# Supplementary material
Source: Research Square preprint supplement (doi:10.21203/rs.3.rs-9590742/v1)
Supplement: Supplementary file 1 [file 0636fb07eed4a78ee33baf4e.xlsx]

## Sheet: S1A_Holstein populations
Table S1A Published whole genome DNA sequencing data for SINE insertion polymorphism
name	RUN	BioSample	BioProject	Origin
holstein4	ERR5748156	SAMEA7989418	PRJEB44441	France
holstein3	ERR5748157	SAMEA7992418	PRJEB44441	France
holstein1	ERR5748158	SAMEA7997668	PRJEB44441	France
holstein2	ERR5748159	SAMEA7999918	PRJEB44441	France
holstein53	SRR934405	SAMN02225734	PRJNA210521	South Korea
holstein61	SRR934406	SAMN02225735	PRJNA210521	South Korea
holstein60	SRR934407	SAMN02225736	PRJNA210521	South Korea
holstein54	SRR934408	SAMN02225737	PRJNA210521	South Korea
holstein62	SRR934409	SAMN02225738	PRJNA210521	South Korea
holstein55	SRR934410	SAMN02225739	PRJNA210521	South Korea
holstein58	SRR934411	SAMN02225740	PRJNA210521	South Korea
holstein59	SRR934412	SAMN02225741	PRJNA210521	South Korea
holstein57	SRR934413	SAMN02225742	PRJNA210521	South Korea
holstein56	SRR934414	SAMN02225743	PRJNA210521	South Korea
holstein165	SRR1188706	SAMN02647168	PRJNA238491	1000 Bull genomes project
holstein79	SRR1262533	SAMN02666026	PRJNA238491	1000 Bull genomes project
holstein77	SRR1262536	SAMN02670933	PRJNA238491	1000 Bull genomes project
holstein75	SRR1262538	SAMN02670934	PRJNA238491	1000 Bull genomes project
holstein70	SRR1262539	SAMN02670935	PRJNA238491	1000 Bull genomes project
holstein124	SRR1262714	SAMN02671454	PRJNA238491	1000 Bull genomes project
holstein104	SRR1262715	SAMN02671455	PRJNA238491	1000 Bull genomes project
holstein129	SRR1262716	SAMN02671456	PRJNA238491	1000 Bull genomes project
holstein126	SRR1262717	SAMN02671457	PRJNA238491	1000 Bull genomes project
holstein156	SRR1262718	SAMN02671458	PRJNA238491	1000 Bull genomes project
holstein99	SRR1262719	SAMN02671459	PRJNA238491	1000 Bull genomes project
holstein116	SRR1262720	SAMN02671460	PRJNA238491	1000 Bull genomes project
holstein107	SRR1262721	SAMN02671461	PRJNA238491	1000 Bull genomes project
holstein122	SRR1262722	SAMN02671462	PRJNA238491	1000 Bull genomes project
holstein80	SRR1262723	SAMN02671463	PRJNA238491	1000 Bull genomes project
holstein97	SRR1262724	SAMN02671464	PRJNA238491	1000 Bull genomes project
holstein128	SRR1262725	SAMN02671465	PRJNA238491	1000 Bull genomes project
holstein139	SRR1262726	SAMN02671466	PRJNA238491	1000 Bull genomes project
holstein111	SRR1262727	SAMN02671467	PRJNA238491	1000 Bull genomes project
holstein118	SRR1262728	SAMN02671468	PRJNA238491	1000 Bull genomes project
holstein105	SRR1262729	SAMN02671469	PRJNA238491	1000 Bull genomes project
holstein143	SRR1262730	SAMN02671470	PRJNA238491	1000 Bull genomes project
holstein91	SRR1262731	SAMN02671471	PRJNA238491	1000 Bull genomes project
holstein95	SRR1262732	SAMN02671472	PRJNA238491	1000 Bull genomes project
holstein102	SRR1262733	SAMN02671473	PRJNA238491	1000 Bull genomes project
holstein94	SRR1262734	SAMN02671474	PRJNA238491	1000 Bull genomes project
holstein110	SRR1262735	SAMN02671475	PRJNA238491	1000 Bull genomes project
holstein142	SRR1262736	SAMN02671476	PRJNA238491	1000 Bull genomes project
holstein144	SRR1262737	SAMN02671477	PRJNA238491	1000 Bull genomes project
holstein141	SRR1262738	SAMN02671478	PRJNA238491	1000 Bull genomes project
holstein106	SRR1262739	SAMN02671479	PRJNA238491	1000 Bull genomes project
holstein93	SRR1262740	SAMN02671480	PRJNA238491	1000 Bull genomes project
holstein101	SRR1262741	SAMN02671481	PRJNA238491	1000 Bull genomes project
holstein136	SRR1262742	SAMN02671482	PRJNA238491	1000 Bull genomes project
holstein138	SRR1262743	SAMN02671483	PRJNA238491	1000 Bull genomes project
holstein113	SRR1262744	SAMN02671484	PRJNA238491	1000 Bull genomes project
holstein109	SRR1262745	SAMN02671485	PRJNA238491	1000 Bull genomes project
holstein130	SRR1262746	SAMN02671486	PRJNA238491	1000 Bull genomes project
holstein132	SRR1262747	SAMN02671487	PRJNA238491	1000 Bull genomes project
holstein117	SRR1262748	SAMN02671488	PRJNA238491	1000 Bull genomes project
holstein121	SRR1262749	SAMN02671489	PRJNA238491	1000 Bull genomes project
holstein114	SRR1262750	SAMN02671490	PRJNA238491	1000 Bull genomes project
holstein115	SRR1262751	SAMN02671491	PRJNA238491	1000 Bull genomes project
holstein127	SRR1262752	SAMN02671492	PRJNA238491	1000 Bull genomes project
holstein125	SRR1262753	SAMN02671493	PRJNA238491	1000 Bull genomes project
holstein120	SRR1262754	SAMN02671494	PRJNA238491	1000 Bull genomes project
holstein98	SRR1262755	SAMN02671495	PRJNA238491	1000 Bull genomes project
holstein66	SRR1262660	SAMN02671543	PRJNA238491	1000 Bull genomes project
holstein153	SRR1262661	SAMN02671544	PRJNA238491	1000 Bull genomes project
holstein68	SRR1262662	SAMN02671545	PRJNA238491	1000 Bull genomes project
holstein103	SRR1262663	SAMN02671546	PRJNA238491	1000 Bull genomes project
holstein158	SRR1262664	SAMN02671547	PRJNA238491	1000 Bull genomes project
holstein76	SRR1262665	SAMN02671548	PRJNA238491	1000 Bull genomes project
holstein63	SRR1262666	SAMN02671549	PRJNA238491	1000 Bull genomes project
holstein72	SRR1262667	SAMN02671550	PRJNA238491	1000 Bull genomes project
holstein137	SRR1262668	SAMN02671551	PRJNA238491	1000 Bull genomes project
holstein87	SRR1262669	SAMN02671552	PRJNA238491	1000 Bull genomes project
holstein86	SRR1262670	SAMN02671553	PRJNA238491	1000 Bull genomes project
holstein82	SRR1262671	SAMN02671554	PRJNA238491	1000 Bull genomes project
holstein154	SRR1262672	SAMN02671555	PRJNA238491	1000 Bull genomes project
holstein89	SRR1262673	SAMN02671556	PRJNA238491	1000 Bull genomes project
holstein175	SRR1262674	SAMN02671557	PRJNA238491	1000 Bull genomes project
holstein131	SRR1262675	SAMN02671558	PRJNA238491	1000 Bull genomes project
holstein85	SRR1262676	SAMN02671559	PRJNA238491	1000 Bull genomes project
holstein173	SRR1262677	SAMN02671560	PRJNA238491	1000 Bull genomes project
holstein140	SRR1262678	SAMN02671561	PRJNA238491	1000 Bull genomes project
holstein151	SRR1262679	SAMN02671562	PRJNA238491	1000 Bull genomes project
holstein84	SRR1262680	SAMN02671563	PRJNA238491	1000 Bull genomes project
holstein167	SRR1262681	SAMN02671564	PRJNA238491	1000 Bull genomes project
holstein119	SRR1262682	SAMN02671565	PRJNA238491	1000 Bull genomes project
holstein92	SRR1262683	SAMN02671566	PRJNA238491	1000 Bull genomes project
holstein169	SRR1262684	SAMN02671567	PRJNA238491	1000 Bull genomes project
holstein83	SRR1262685	SAMN02671568	PRJNA238491	1000 Bull genomes project
holstein81	SRR1262686	SAMN02671569	PRJNA238491	1000 Bull genomes project
holstein69	SRR1262687	SAMN02671570	PRJNA238491	1000 Bull genomes project
holstein74	SRR1262688	SAMN02671571	PRJNA238491	1000 Bull genomes project
holstein90	SRR1262689	SAMN02671572	PRJNA238491	1000 Bull genomes project
holstein71	SRR1262690	SAMN02671573	PRJNA238491	1000 Bull genomes project
holstein133	SRR1262691	SAMN02671574	PRJNA238491	1000 Bull genomes project
holstein78	SRR1262692	SAMN02671575	PRJNA238491	1000 Bull genomes project
holstein73	SRR1262693	SAMN02671576	PRJNA238491	1000 Bull genomes project
holstein157	SRR1262694	SAMN02671577	PRJNA238491	1000 Bull genomes project
holstein183	SRR1262695	SAMN02671578	PRJNA238491	1000 Bull genomes project
holstein187	SRR1262696	SAMN02671579	PRJNA238491	1000 Bull genomes project
holstein135	SRR1262697	SAMN02671580	PRJNA238491	1000 Bull genomes project
holstein195	SRR1262698	SAMN02671581	PRJNA238491	1000 Bull genomes project
holstein163	SRR1262699	SAMN02671582	PRJNA238491	1000 Bull genomes project
holstein182	SRR1262700	SAMN02671583	PRJNA238491	1000 Bull genomes project
holstein194	SRR1262701	SAMN02671584	PRJNA238491	1000 Bull genomes project
holstein178	SRR1262702	SAMN02671585	PRJNA238491	1000 Bull genomes project
holstein184	SRR1262703	SAMN02671586	PRJNA238491	1000 Bull genomes project
holstein166	SRR1262704	SAMN02671587	PRJNA238491	1000 Bull genomes project
holstein179	SRR1262705	SAMN02671588	PRJNA238491	1000 Bull genomes project
holstein180	SRR1262706	SAMN02671589	PRJNA238491	1000 Bull genomes project
holstein171	SRR1262707	SAMN02671590	PRJNA238491	1000 Bull genomes project
holstein65	SRR1262708	SAMN02671591	PRJNA238491	1000 Bull genomes project
holstein176	SRR1262709	SAMN02671592	PRJNA238491	1000 Bull genomes project
holstein185	SRR1262710	SAMN02671593	PRJNA238491	1000 Bull genomes project
holstein177	SRR1262711	SAMN02671594	PRJNA238491	1000 Bull genomes project
holstein186	SRR1262712	SAMN02671595	PRJNA238491	1000 Bull genomes project
holstein170	SRR1262713	SAMN02671596	PRJNA238491	1000 Bull genomes project
holstein152	SRR1262756	SAMN02671612	PRJNA238491	1000 Bull genomes project
holstein191	SRR1262757	SAMN02671613	PRJNA238491	1000 Bull genomes project
holstein192	SRR1262758	SAMN02671614	PRJNA238491	1000 Bull genomes project
holstein193	SRR1262759	SAMN02671615	PRJNA238491	1000 Bull genomes project
holstein174	SRR1262760	SAMN02671616	PRJNA238491	1000 Bull genomes project
holstein197	SRR1262761	SAMN02671617	PRJNA238491	1000 Bull genomes project
holstein188	SRR1262762	SAMN02671618	PRJNA238491	1000 Bull genomes project
holstein168	SRR1262763	SAMN02671619	PRJNA238491	1000 Bull genomes project
holstein190	SRR1262764	SAMN02671620	PRJNA238491	1000 Bull genomes project
holstein196	SRR1262765	SAMN02671621	PRJNA238491	1000 Bull genomes project
holstein172	SRR1262766	SAMN02671622	PRJNA238491	1000 Bull genomes project
holstein108	SRR1262767	SAMN02671623	PRJNA238491	1000 Bull genomes project
holstein189	SRR1262768	SAMN02671624	PRJNA238491	1000 Bull genomes project
holstein155	SRR1262769	SAMN02671668	PRJNA238491	1000 Bull genomes project
holstein149	SRR1262770	SAMN02671669	PRJNA238491	1000 Bull genomes project
holstein147	SRR1262771	SAMN02671670	PRJNA238491	1000 Bull genomes project
holstein64	SRR1262772	SAMN02671671	PRJNA238491	1000 Bull genomes project
holstein112	SRR1262773	SAMN02671672	PRJNA238491	1000 Bull genomes project
holstein148	SRR1262774	SAMN02671673	PRJNA238491	1000 Bull genomes project
holstein123	SRR1262775	SAMN02671674	PRJNA238491	1000 Bull genomes project
holstein146	SRR1262776	SAMN02671675	PRJNA238491	1000 Bull genomes project
holstein145	SRR1262777	SAMN02671676	PRJNA238491	1000 Bull genomes project
holstein96	SRR1262778	SAMN02671677	PRJNA238491	1000 Bull genomes project
holstein198	SRR1262779	SAMN02671723	PRJNA238491	1000 Bull genomes project
holstein162	SRR1262780	SAMN02671724	PRJNA238491	1000 Bull genomes project
holstein150	SRR1262781	SAMN02671725	PRJNA238491	1000 Bull genomes project
holstein134	SRR1262782	SAMN02671726	PRJNA238491	1000 Bull genomes project
holstein67	SRR1262783	SAMN02671727	PRJNA238491	1000 Bull genomes project
holstein88	SRR1262784	SAMN02671728	PRJNA238491	1000 Bull genomes project
holstein161	SRR1262785	SAMN02671729	PRJNA238491	1000 Bull genomes project
holstein164	SRR1262786	SAMN02671730	PRJNA238491	1000 Bull genomes project
holstein160	SRR1262787	SAMN02671731	PRJNA238491	1000 Bull genomes project
holstein100	SRR1262788	SAMN02671732	PRJNA238491	1000 Bull genomes project
holstein181	SRR1205973	SAMN02700161	PRJNA238491	1000 Bull genomes project
holstein159	SRR1205992	SAMN02700162	PRJNA238491	1000 Bull genomes project
holstein15	SRR1346386	SAMN02841109	PRJNA176557	1000 Bull genomes project
holstein5	SRR1346392	SAMN02841117	PRJNA176557	1000 Bull genomes project
holstein13	SRR1346390	SAMN02841118	PRJNA176557	1000 Bull genomes project
holstein12	SRR1346389	SAMN02841119	PRJNA176557	1000 Bull genomes project
holstein52	SRR1348583	SAMN02842701	PRJNA176557	1000 Bull genomes project
holstein18	SRR1348592	SAMN02842711	PRJNA176557	1000 Bull genomes project
holstein29	SRR1348572	SAMN02842716	PRJNA176557	1000 Bull genomes project
holstein51	SRR1365147	SAMN02843110	PRJNA176557	1000 Bull genomes project
holstein14	SRR1365104	SAMN02843114	PRJNA176557	1000 Bull genomes project
holstein33	SRR1365101	SAMN02843120	PRJNA176557	1000 Bull genomes project
holstein34	SRR1365121	SAMN02843124	PRJNA176557	1000 Bull genomes project
holstein31	SRR1365119	SAMN02843125	PRJNA176557	1000 Bull genomes project
holstein32	SRR1365123	SAMN02843126	PRJNA176557	1000 Bull genomes project
holstein30	SRR1365120	SAMN02843127	PRJNA176557	1000 Bull genomes project
holstein38	SRR1365117	SAMN02843128	PRJNA176557	1000 Bull genomes project
holstein36	SRR1365116	SAMN02843129	PRJNA176557	1000 Bull genomes project
holstein39	SRR1365118	SAMN02843130	PRJNA176557	1000 Bull genomes project
holstein17	SRR1365114	SAMN02843139	PRJNA176557	1000 Bull genomes project
holstein28	SRR1365115	SAMN02843140	PRJNA176557	1000 Bull genomes project
holstein19	SRR1425166	SAMN02843154	PRJNA176557	1000 Bull genomes project
holstein9	SRR1425165	SAMN02843155	PRJNA176557	1000 Bull genomes project
holstein50	SRR1425131	SAMN02843156	PRJNA176557	1000 Bull genomes project
holstein42	SRR1425136	SAMN02843157	PRJNA176557	1000 Bull genomes project
holstein37	SRR1425128	SAMN02843158	PRJNA176557	1000 Bull genomes project
holstein35	SRR1425135	SAMN02843159	PRJNA176557	1000 Bull genomes project
holstein41	SRR1425132	SAMN02843160	PRJNA176557	1000 Bull genomes project
holstein46	SRR1425134	SAMN02843161	PRJNA176557	1000 Bull genomes project
holstein47	SRR1425127	SAMN02843162	PRJNA176557	1000 Bull genomes project
holstein48	SRR1425129	SAMN02843163	PRJNA176557	1000 Bull genomes project
holstein43	SRR1425125	SAMN02843164	PRJNA176557	1000 Bull genomes project
holstein44	SRR1425130	SAMN02843165	PRJNA176557	1000 Bull genomes project
holstein49	SRR1425133	SAMN02843166	PRJNA176557	1000 Bull genomes project
holstein40	SRR1425126	SAMN02843167	PRJNA176557	1000 Bull genomes project
holstein45	SRR1425144	SAMN02843168	PRJNA176557	1000 Bull genomes project
holstein26	SRR1425162	SAMN02843169	PRJNA176557	1000 Bull genomes project
holstein7	SRR1425160	SAMN02843170	PRJNA176557	1000 Bull genomes project
holstein23	SRR1425161	SAMN02843171	PRJNA176557	1000 Bull genomes project
holstein27	SRR1425157	SAMN02843172	PRJNA176557	1000 Bull genomes project
holstein22	SRR1425164	SAMN02843173	PRJNA176557	1000 Bull genomes project
holstein20	SRR1425159	SAMN02843174	PRJNA176557	1000 Bull genomes project
holstein21	SRR1425163	SAMN02843175	PRJNA176557	1000 Bull genomes project
holstein24	SRR1425155	SAMN02843176	PRJNA176557	1000 Bull genomes project
holstein25	SRR1425158	SAMN02843177	PRJNA176557	1000 Bull genomes project
holstein16	SRR1425156	SAMN02843178	PRJNA176557	1000 Bull genomes project
holstein11	SRR1425138	SAMN02843179	PRJNA176557	1000 Bull genomes project
holstein10	SRR1425137	SAMN02843180	PRJNA176557	1000 Bull genomes project
holstein8	SRR1425140	SAMN02843181	PRJNA176557	1000 Bull genomes project
holstein6	SRR1425139	SAMN02843182	PRJNA176557	1000 Bull genomes project
holstein199	SRR2016790	SAMN03387021	PRJNA277147	USA
holstein199	SRR2016793	SAMN03387021	PRJNA277147	USA
holstein199	SRR2016789	SAMN03387021	PRJNA277147	USA
holstein199	SRR2016794	SAMN03387021	PRJNA277147	USA
holstein199	SRR2016792	SAMN03387021	PRJNA277147	USA
holstein199	SRR2016803	SAMN03387021	PRJNA277147	USA
holstein199	SRR2016798	SAMN03387021	PRJNA277147	USA
holstein199	SRR2016772	SAMN03387021	PRJNA277147	USA
holstein199	SRR2016791	SAMN03387021	PRJNA277147	USA
holstein199	SRR2016788	SAMN03387021	PRJNA277147	USA
holstein199	SRR2016797	SAMN03387021	PRJNA277147	USA
holstein199	SRR2016801	SAMN03387021	PRJNA277147	USA
holstein199	SRR2016802	SAMN03387021	PRJNA277147	USA
holstein199	SRR2016804	SAMN03387021	PRJNA277147	USA
holstein199	SRR2016769	SAMN03387021	PRJNA277147	USA
holstein199	SRR2016771	SAMN03387021	PRJNA277147	USA
holstein200	SRR6116785	SAMN04201345	PRJNA299394	Denmark
holstein200	SRR2770344	SAMN04201345	PRJNA299394	Denmark
holstein201	SRR2772316	SAMN04201346	PRJNA299394	Denmark
holstein202	SRR2772320	SAMN04201362	PRJNA299394	Denmark
holstein203	SRR2786027	SAMN04201403	PRJNA299394	Denmark
holstein208	SRR4279977	SAMN05788487	PRJNA343262	USA
holstein210	SRR4279978	SAMN05788488	PRJNA343262	USA
holstein209	SRR4279979	SAMN05788489	PRJNA343262	USA
holstein204	SRR4279990	SAMN05788492	PRJNA343262	USA
holstein204	SRR4279989	SAMN05788492	PRJNA343262	USA
holstein204	SRR4279992	SAMN05788492	PRJNA343262	USA
holstein204	SRR4279993	SAMN05788492	PRJNA343262	USA
holstein211	SRR4280060	SAMN05788504	PRJNA343262	USA
holstein206	SRR4280079	SAMN05788508	PRJNA343262	USA
holstein206	SRR4280077	SAMN05788508	PRJNA343262	USA
holstein206	SRR4280076	SAMN05788508	PRJNA343262	USA
holstein205	SRR4280175	SAMN05788532	PRJNA343262	USA
holstein205	SRR4280172	SAMN05788532	PRJNA343262	USA
holstein205	SRR4280173	SAMN05788532	PRJNA343262	USA
holstein205	SRR4280176	SAMN05788532	PRJNA343262	USA
holstein207	SRR4280177	SAMN05788533	PRJNA343262	USA
holstein327	SRR4449812	SAMN05938744	PRJNA350384	Germany
holstein325	SRR4449829	SAMN05939266	PRJNA350384	Germany
holstein326	SRR4449830	SAMN05939364	PRJNA350384	Germany
holstein329	SRR4450628	SAMN05942192	PRJNA350593	Germany
holstein330	SRR4450629	SAMN05942193	PRJNA350593	Germany
holstein328	SRR4450630	SAMN05942194	PRJNA350593	Germany
holstein332	SRR5428252	SAMN06698764	PRJNA382024	New Zealand
holstein331	SRR5428249	SAMN06698773	PRJNA382024	New Zealand
holstein400	SRR7340676	SAMN08612380	PRJNA431934	Australia
holstein347	SRR7340677	SAMN08612381	PRJNA431934	Australia
holstein344	SRR7340674	SAMN08612382	PRJNA431934	Australia
holstein343	SRR7340675	SAMN08612383	PRJNA431934	Australia
holstein338	SRR7340672	SAMN08612384	PRJNA431934	Australia
holstein340	SRR7340673	SAMN08612385	PRJNA431934	Australia
holstein384	SRR7340670	SAMN08612386	PRJNA431934	Australia
holstein356	SRR7340671	SAMN08612387	PRJNA431934	Australia
holstein396	SRR7340678	SAMN08612388	PRJNA431934	Australia
holstein404	SRR7340679	SAMN08612389	PRJNA431934	Australia
holstein348	SRR7340804	SAMN08612390	PRJNA431934	Australia
holstein336	SRR7340805	SAMN08612391	PRJNA431934	Australia
holstein341	SRR7340802	SAMN08612392	PRJNA431934	Australia
holstein385	SRR7340803	SAMN08612393	PRJNA431934	Australia
holstein359	SRR7340800	SAMN08612394	PRJNA431934	Australia
holstein355	SRR7340801	SAMN08612395	PRJNA431934	Australia
holstein351	SRR7340798	SAMN08612396	PRJNA431934	Australia
holstein402	SRR7340799	SAMN08612397	PRJNA431934	Australia
holstein357	SRR7340796	SAMN08612398	PRJNA431934	Australia
holstein424	SRR7340797	SAMN08612399	PRJNA431934	Australia
holstein394	SRR7340727	SAMN08612400	PRJNA431934	Australia
holstein354	SRR7340726	SAMN08612401	PRJNA431934	Australia
holstein440	SRR7340725	SAMN08612402	PRJNA431934	Australia
holstein393	SRR7340724	SAMN08612403	PRJNA431934	Australia
holstein398	SRR7340723	SAMN08612404	PRJNA431934	Australia
holstein352	SRR7340722	SAMN08612405	PRJNA431934	Australia
holstein420	SRR7340720	SAMN08612406	PRJNA431934	Australia
holstein365	SRR7340718	SAMN08612407	PRJNA431934	Australia
holstein360	SRR7340729	SAMN08612408	PRJNA431934	Australia
holstein411	SRR7340728	SAMN08612409	PRJNA431934	Australia
holstein350	SRR7340750	SAMN08612410	PRJNA431934	Australia
holstein353	SRR7340751	SAMN08612411	PRJNA431934	Australia
holstein337	SRR7340752	SAMN08612412	PRJNA431934	Australia
holstein345	SRR7340753	SAMN08612413	PRJNA431934	Australia
holstein358	SRR7340758	SAMN08612414	PRJNA431934	Australia
holstein339	SRR7340754	SAMN08612415	PRJNA431934	Australia
holstein392	SRR7340755	SAMN08612416	PRJNA431934	Australia
holstein346	SRR7340756	SAMN08612417	PRJNA431934	Australia
holstein342	SRR7340757	SAMN08612418	PRJNA431934	Australia
holstein439	SRR7340759	SAMN08612419	PRJNA431934	Australia
holstein414	SRR7340681	SAMN08612420	PRJNA431934	Australia
holstein361	SRR7340680	SAMN08612421	PRJNA431934	Australia
holstein432	SRR7340683	SAMN08612422	PRJNA431934	Australia
holstein406	SRR7340682	SAMN08612423	PRJNA431934	Australia
holstein368	SRR7340685	SAMN08612424	PRJNA431934	Australia
holstein334	SRR7440527	SAMN08612425	PRJNA431934	Australia
holstein334	SRR7390685	SAMN08612425	PRJNA431934	Australia
holstein334	SRR7340684	SAMN08612425	PRJNA431934	Australia
holstein334	SRR7390684	SAMN08612425	PRJNA431934	Australia
holstein446	SRR7340687	SAMN08612426	PRJNA431934	Australia
holstein441	SRR7340686	SAMN08612427	PRJNA431934	Australia
holstein405	SRR7340689	SAMN08612428	PRJNA431934	Australia
holstein371	SRR7340688	SAMN08612429	PRJNA431934	Australia
holstein372	SRR7340702	SAMN08612430	PRJNA431934	Australia
holstein363	SRR7340703	SAMN08612431	PRJNA431934	Australia
holstein335	SRR7340700	SAMN08612432	PRJNA431934	Australia
holstein370	SRR7340701	SAMN08612433	PRJNA431934	Australia
holstein379	SRR7340706	SAMN08612434	PRJNA431934	Australia
holstein375	SRR7340707	SAMN08612435	PRJNA431934	Australia
holstein380	SRR7340704	SAMN08612436	PRJNA431934	Australia
holstein362	SRR7340705	SAMN08612437	PRJNA431934	Australia
holstein333	SRR7390698	SAMN08612438	PRJNA431934	Australia
holstein333	SRR7390699	SAMN08612438	PRJNA431934	Australia
holstein333	SRR7390700	SAMN08612438	PRJNA431934	Australia
holstein333	SRR7390702	SAMN08612438	PRJNA431934	Australia
holstein333	SRR7390703	SAMN08612438	PRJNA431934	Australia
holstein333	SRR7390701	SAMN08612438	PRJNA431934	Australia
holstein333	SRR7440526	SAMN08612438	PRJNA431934	Australia
holstein333	SRR7340708	SAMN08612438	PRJNA431934	Australia
holstein333	SRR7390697	SAMN08612438	PRJNA431934	Australia
holstein417	SRR7340709	SAMN08612439	PRJNA431934	Australia
holstein391	SRR7340832	SAMN08612440	PRJNA431934	Australia
holstein397	SRR7340831	SAMN08612441	PRJNA431934	Australia
holstein349	SRR7340830	SAMN08612442	PRJNA431934	Australia
holstein438	SRR7340828	SAMN08612443	PRJNA431934	Australia
holstein419	SRR7340835	SAMN08612444	PRJNA431934	Australia
holstein422	SRR7340834	SAMN08612445	PRJNA431934	Australia
holstein418	SRR7340833	SAMN08612446	PRJNA431934	Australia
holstein366	SRR7340829	SAMN08612447	PRJNA431934	Australia
holstein403	SRR7340827	SAMN08612448	PRJNA431934	Australia
holstein428	SRR7340826	SAMN08612449	PRJNA431934	Australia
holstein373	SRR7340850	SAMN08612450	PRJNA431934	Australia
holstein448	SRR7340851	SAMN08612451	PRJNA431934	Australia
holstein387	SRR7340852	SAMN08612452	PRJNA431934	Australia
holstein425	SRR7340853	SAMN08612453	PRJNA431934	Australia
holstein423	SRR7340846	SAMN08612454	PRJNA431934	Australia
holstein409	SRR7340848	SAMN08612455	PRJNA431934	Australia
holstein408	SRR7340849	SAMN08612456	PRJNA431934	Australia
holstein376	SRR7340847	SAMN08612457	PRJNA431934	Australia
holstein437	SRR7340854	SAMN08612458	PRJNA431934	Australia
holstein386	SRR7340855	SAMN08612459	PRJNA431934	Australia
holstein369	SRR7340735	SAMN08612460	PRJNA431934	Australia
holstein364	SRR7340734	SAMN08612461	PRJNA431934	Australia
holstein390	SRR7340737	SAMN08612462	PRJNA431934	Australia
holstein388	SRR7340736	SAMN08612463	PRJNA431934	Australia
holstein381	SRR7340731	SAMN08612464	PRJNA431934	Australia
holstein452	SRR7461348	SAMN09510408	PRJNA477833	Ireland
holstein449	SRR7466788	SAMN09510409	PRJNA477833	Ireland
holstein451	SRR7466789	SAMN09510410	PRJNA477833	Ireland
holstein450	SRR7466787	SAMN09510411	PRJNA477833	Ireland
holstein456	SRR7994019	SAMN09519603	PRJNA478565	Canada
holstein456	SRR7521433	SAMN09519603	PRJNA478565	Canada
holstein477	SRR7994018	SAMN09519604	PRJNA478565	Canada
holstein477	SRR7521437	SAMN09519604	PRJNA478565	Canada
holstein476	SRR7994017	SAMN09519605	PRJNA478565	Canada
holstein476	SRR7521417	SAMN09519605	PRJNA478565	Canada
holstein480	SRR7994016	SAMN09519606	PRJNA478565	Canada
holstein480	SRR7521434	SAMN09519606	PRJNA478565	Canada
holstein481	SRR7994015	SAMN09519607	PRJNA478565	Canada
holstein481	SRR7521443	SAMN09519607	PRJNA478565	Canada
holstein482	SRR7994014	SAMN09519608	PRJNA478565	Canada
holstein482	SRR7521444	SAMN09519608	PRJNA478565	Canada
holstein483	SRR7994013	SAMN09519609	PRJNA478565	Canada
holstein483	SRR7521414	SAMN09519609	PRJNA478565	Canada
holstein474	SRR7994012	SAMN09519610	PRJNA478565	Canada
holstein474	SRR7521435	SAMN09519610	PRJNA478565	Canada
holstein475	SRR7994021	SAMN09519611	PRJNA478565	Canada
holstein475	SRR7521413	SAMN09519611	PRJNA478565	Canada
holstein459	SRR7994020	SAMN09519612	PRJNA478565	Canada
holstein459	SRR7521419	SAMN09519612	PRJNA478565	Canada
holstein468	SRR7994029	SAMN09519613	PRJNA478565	Canada
holstein468	SRR7521418	SAMN09519613	PRJNA478565	Canada
holstein469	SRR7994028	SAMN09519614	PRJNA478565	Canada
holstein469	SRR7521424	SAMN09519614	PRJNA478565	Canada
holstein454	SRR7994031	SAMN09519615	PRJNA478565	Canada
holstein454	SRR7521430	SAMN09519615	PRJNA478565	Canada
holstein458	SRR7994030	SAMN09519616	PRJNA478565	Canada
holstein458	SRR7521442	SAMN09519616	PRJNA478565	Canada
holstein457	SRR7994025	SAMN09519617	PRJNA478565	Canada
holstein457	SRR7521441	SAMN09519617	PRJNA478565	Canada
holstein484	SRR7994024	SAMN09519618	PRJNA478565	Canada
holstein484	SRR7521436	SAMN09519618	PRJNA478565	Canada
holstein478	SRR7994027	SAMN09519619	PRJNA478565	Canada
holstein478	SRR7521426	SAMN09519619	PRJNA478565	Canada
holstein464	SRR7994026	SAMN09519620	PRJNA478565	Canada
holstein464	SRR7521422	SAMN09519620	PRJNA478565	Canada
holstein466	SRR7994023	SAMN09519621	PRJNA478565	Canada
holstein466	SRR7521439	SAMN09519621	PRJNA478565	Canada
holstein465	SRR7994022	SAMN09519622	PRJNA478565	Canada
holstein465	SRR7521429	SAMN09519622	PRJNA478565	Canada
holstein453	SRR7994002	SAMN09519623	PRJNA478565	Canada
holstein453	SRR7521440	SAMN09519623	PRJNA478565	Canada
holstein479	SRR7994003	SAMN09519624	PRJNA478565	Canada
holstein479	SRR7521438	SAMN09519624	PRJNA478565	Canada
holstein455	SRR7994004	SAMN09519625	PRJNA478565	Canada
holstein455	SRR7521425	SAMN09519625	PRJNA478565	Canada
holstein462	SRR7994005	SAMN09519626	PRJNA478565	Canada
holstein462	SRR7521415	SAMN09519626	PRJNA478565	Canada
holstein460	SRR7994006	SAMN09519627	PRJNA478565	Canada
holstein460	SRR7521416	SAMN09519627	PRJNA478565	Canada
holstein471	SRR7994007	SAMN09519628	PRJNA478565	Canada
holstein471	SRR7521432	SAMN09519628	PRJNA478565	Canada
holstein472	SRR7994008	SAMN09519629	PRJNA478565	Canada
holstein472	SRR7521421	SAMN09519629	PRJNA478565	Canada
holstein470	SRR7994009	SAMN09519630	PRJNA478565	Canada
holstein470	SRR7521428	SAMN09519630	PRJNA478565	Canada
holstein463	SRR7994010	SAMN09519631	PRJNA478565	Canada
holstein463	SRR7521427	SAMN09519631	PRJNA478565	Canada
holstein473	SRR7994011	SAMN09519632	PRJNA478565	Canada
holstein473	SRR7521420	SAMN09519632	PRJNA478565	Canada
holstein467	SRR7994033	SAMN09519633	PRJNA478565	Canada
holstein467	SRR7521431	SAMN09519633	PRJNA478565	Canada
holstein461	SRR7994032	SAMN09519634	PRJNA478565	Canada
holstein461	SRR7521423	SAMN09519634	PRJNA478565	Canada
holstein487	SRR7897211	SAMN10108008	PRJNA492844	Germany
holstein486	SRR7897210	SAMN10108011	PRJNA492844	Germany
holstein485	SRR7897212	SAMN10108012	PRJNA492844	Germany
holstein488	SRR9126620	SAMN10598549	PRJNA494431	USA
holstein488	SRR8324596	SAMN10598549	PRJNA494431	USA
holstein488	SRR8324591	SAMN10598549	PRJNA494431	USA
holstein489	SRR8324586	SAMN10598568	PRJNA494431	USA
holstein228	SRR8587918	SAMN10940582	PRJNA343262	USA
holstein237	SRR8587917	SAMN10940583	PRJNA343262	USA
holstein230	SRR8587916	SAMN10940584	PRJNA343262	USA
holstein233	SRR8587907	SAMN10940585	PRJNA343262	USA
holstein234	SRR8587906	SAMN10940586	PRJNA343262	USA
holstein225	SRR8588199	SAMN10940587	PRJNA343262	USA
holstein219	SRR8588198	SAMN10940588	PRJNA343262	USA
holstein235	SRR8588203	SAMN10940589	PRJNA343262	USA
holstein232	SRR8588200	SAMN10940590	PRJNA343262	USA
holstein240	SRR8588195	SAMN10940591	PRJNA343262	USA
holstein238	SRR8588194	SAMN10940592	PRJNA343262	USA
holstein241	SRR8587910	SAMN10940593	PRJNA343262	USA
holstein236	SRR8587904	SAMN10940594	PRJNA343262	USA
holstein231	SRR8587999	SAMN10940595	PRJNA343262	USA
holstein226	SRR8588190	SAMN10940596	PRJNA343262	USA
holstein223	SRR8588025	SAMN10940597	PRJNA343262	USA
holstein229	SRR8588026	SAMN10940598	PRJNA343262	USA
holstein239	SRR8588085	SAMN10940599	PRJNA343262	USA
holstein221	SRR8588086	SAMN10940600	PRJNA343262	USA
holstein217	SRR8588083	SAMN10940601	PRJNA343262	USA
holstein220	SRR8588084	SAMN10940602	PRJNA343262	USA
holstein213	SRR8588081	SAMN10940603	PRJNA343262	USA
holstein212	SRR8588082	SAMN10940604	PRJNA343262	USA
holstein214	SRR8588109	SAMN10940605	PRJNA343262	USA
holstein222	SRR8588013	SAMN10940606	PRJNA343262	USA
holstein227	SRR8587984	SAMN10940607	PRJNA343262	USA
holstein218	SRR8587981	SAMN10940608	PRJNA343262	USA
holstein215	SRR8587980	SAMN10940609	PRJNA343262	USA
holstein224	SRR8587979	SAMN10940610	PRJNA343262	USA
holstein216	SRR8587988	SAMN10940611	PRJNA343262	USA
holstein269	SRR8587983	SAMN10940612	PRJNA343262	USA
holstein264	SRR8587985	SAMN10940613	PRJNA343262	USA
holstein268	SRR8587982	SAMN10940614	PRJNA343262	USA
holstein245	SRR8587989	SAMN10940615	PRJNA343262	USA
holstein316	SRR8587986	SAMN10940616	PRJNA343262	USA
holstein248	SRR8587848	SAMN10940617	PRJNA343262	USA
holstein321	SRR8587850	SAMN10940618	PRJNA343262	USA
holstein256	SRR8587851	SAMN10940619	PRJNA343262	USA
holstein305	SRR8587852	SAMN10940620	PRJNA343262	USA
holstein297	SRR8587845	SAMN10940621	PRJNA343262	USA
holstein280	SRR8587846	SAMN10940622	PRJNA343262	USA
holstein285	SRR8587847	SAMN10940623	PRJNA343262	USA
holstein283	SRR8587849	SAMN10940624	PRJNA343262	USA
holstein310	SRR8587853	SAMN10940625	PRJNA343262	USA
holstein292	SRR8587854	SAMN10940626	PRJNA343262	USA
holstein260	SRR8587820	SAMN10940627	PRJNA343262	USA
holstein291	SRR8587819	SAMN10940628	PRJNA343262	USA
holstein296	SRR8587822	SAMN10940629	PRJNA343262	USA
holstein277	SRR8587821	SAMN10940630	PRJNA343262	USA
holstein263	SRR8587824	SAMN10940631	PRJNA343262	USA
holstein281	SRR8587823	SAMN10940632	PRJNA343262	USA
holstein246	SRR8587826	SAMN10940633	PRJNA343262	USA
holstein258	SRR8587825	SAMN10940634	PRJNA343262	USA
holstein254	SRR8587828	SAMN10940635	PRJNA343262	USA
holstein298	SRR8587827	SAMN10940636	PRJNA343262	USA
holstein247	SRR8588122	SAMN10940637	PRJNA343262	USA
holstein315	SRR8588123	SAMN10940638	PRJNA343262	USA
holstein270	SRR8588120	SAMN10940639	PRJNA343262	USA
holstein286	SRR8588121	SAMN10940640	PRJNA343262	USA
holstein312	SRR8588126	SAMN10940641	PRJNA343262	USA
holstein306	SRR8588127	SAMN10940642	PRJNA343262	USA
holstein271	SRR8588124	SAMN10940643	PRJNA343262	USA
holstein265	SRR8588125	SAMN10940644	PRJNA343262	USA
holstein278	SRR8588130	SAMN10940645	PRJNA343262	USA
holstein274	SRR8588132	SAMN10940646	PRJNA343262	USA
holstein290	SRR8588249	SAMN10940647	PRJNA343262	USA
holstein243	SRR8588247	SAMN10940648	PRJNA343262	USA
holstein322	SRR8588246	SAMN10940649	PRJNA343262	USA
holstein284	SRR8588245	SAMN10940650	PRJNA343262	USA
holstein301	SRR8588244	SAMN10940651	PRJNA343262	USA
holstein255	SRR8588243	SAMN10940652	PRJNA343262	USA
holstein303	SRR8588242	SAMN10940653	PRJNA343262	USA
holstein252	SRR8588241	SAMN10940654	PRJNA343262	USA
holstein266	SRR8588256	SAMN10940655	PRJNA343262	USA
holstein276	SRR8588255	SAMN10940656	PRJNA343262	USA
holstein308	SRR8587896	SAMN10940657	PRJNA343262	USA
holstein294	SRR8588184	SAMN10940658	PRJNA343262	USA
holstein289	SRR8587898	SAMN10940659	PRJNA343262	USA
holstein279	SRR8587899	SAMN10940660	PRJNA343262	USA
holstein311	SRR8587900	SAMN10940661	PRJNA343262	USA
holstein299	SRR8587901	SAMN10940662	PRJNA343262	USA
holstein244	SRR8587902	SAMN10940663	PRJNA343262	USA
holstein272	SRR8587903	SAMN10940664	PRJNA343262	USA
holstein309	SRR8588163	SAMN10940665	PRJNA343262	USA
holstein267	SRR8588167	SAMN10940666	PRJNA343262	USA
holstein293	SRR8588068	SAMN10940667	PRJNA343262	USA
holstein319	SRR8588067	SAMN10940668	PRJNA343262	USA
holstein275	SRR8588070	SAMN10940669	PRJNA343262	USA
holstein287	SRR8588069	SAMN10940670	PRJNA343262	USA
holstein251	SRR8588064	SAMN10940671	PRJNA343262	USA
holstein320	SRR8588063	SAMN10940672	PRJNA343262	USA
holstein282	SRR8588066	SAMN10940673	PRJNA343262	USA
holstein242	SRR8588065	SAMN10940674	PRJNA343262	USA
holstein318	SRR8588072	SAMN10940675	PRJNA343262	USA
holstein262	SRR8588071	SAMN10940676	PRJNA343262	USA
holstein273	SRR8587964	SAMN10940677	PRJNA343262	USA
holstein300	SRR8587965	SAMN10940678	PRJNA343262	USA
holstein314	SRR8587962	SAMN10940679	PRJNA343262	USA
holstein250	SRR8587963	SAMN10940680	PRJNA343262	USA
holstein259	SRR8587960	SAMN10940681	PRJNA343262	USA
holstein261	SRR8587961	SAMN10940682	PRJNA343262	USA
holstein313	SRR8587958	SAMN10940683	PRJNA343262	USA
holstein295	SRR8587959	SAMN10940684	PRJNA343262	USA
holstein323	SRR8587967	SAMN10940685	PRJNA343262	USA
holstein302	SRR8587968	SAMN10940686	PRJNA343262	USA
holstein249	SRR8588055	SAMN10940687	PRJNA343262	USA
holstein257	SRR8588056	SAMN10940688	PRJNA343262	USA
holstein288	SRR8588053	SAMN10940689	PRJNA343262	USA
holstein317	SRR8588054	SAMN10940690	PRJNA343262	USA
holstein304	SRR8588059	SAMN10940691	PRJNA343262	USA
holstein324	SRR8588060	SAMN10940692	PRJNA343262	USA
holstein307	SRR8588057	SAMN10940693	PRJNA343262	USA
holstein253	SRR8588058	SAMN10940694	PRJNA343262	USA
holstein490	SRR8727722	SAMN11107031	PRJNA526664	Germany
holstein493	SRR8727719	SAMN11107033	PRJNA526664	Germany
holstein495	SRR8727720	SAMN11107034	PRJNA526664	Germany
holstein492	SRR8727727	SAMN11107035	PRJNA526664	Germany
holstein491	SRR8727728	SAMN11107036	PRJNA526664	Germany
holstein494	SRR8727718	SAMN11107037	PRJNA526664	Germany
holstein496	SRR8944226	SAMN11479477	PRJNA534204	France
holstein497	SRR9117837	SAMN11843850	PRJNA544605	Germany
holstein498	SRR12790178	SAMN16357083	PRJNA667172	USA
holstein500	SRR13733125	SAMN17921756	PRJNA701980	New Zealand
holstein505	SRR13733124	SAMN17921757	PRJNA701980	New Zealand
holstein503	SRR13733123	SAMN17921758	PRJNA701980	New Zealand
holstein501	SRR13733122	SAMN17921759	PRJNA701980	New Zealand
holstein499	SRR13733128	SAMN17921760	PRJNA701980	New Zealand
holstein504	SRR13733127	SAMN17921761	PRJNA701980	New Zealand
holstein502	SRR13733126	SAMN17921762	PRJNA701980	New Zealand
holstein434	SRR14765478	SAMN19491793	PRJNA431934	Australia
holstein433	SRR14765442	SAMN19491794	PRJNA431934	Australia
holstein445	SRR14765429	SAMN19491795	PRJNA431934	Australia
holstein429	SRR14765419	SAMN19491796	PRJNA431934	Australia
holstein431	SRR14765408	SAMN19491797	PRJNA431934	Australia
holstein395	SRR14765399	SAMN19491798	PRJNA431934	Australia
holstein444	SRR14765398	SAMN19491799	PRJNA431934	Australia
holstein401	SRR14765397	SAMN19491800	PRJNA431934	Australia
holstein443	SRR14765396	SAMN19491801	PRJNA431934	Australia
holstein410	SRR14765395	SAMN19491802	PRJNA431934	Australia
holstein412	SRR14765393	SAMN19491803	PRJNA431934	Australia
holstein374	SRR14765389	SAMN19491804	PRJNA431934	Australia
holstein436	SRR14765391	SAMN19491805	PRJNA431934	Australia
holstein442	SRR14765387	SAMN19491806	PRJNA431934	Australia
holstein435	SRR14765388	SAMN19491807	PRJNA431934	Australia
holstein389	SRR14765386	SAMN19491808	PRJNA431934	Australia
holstein415	SRR14765385	SAMN19491809	PRJNA431934	Australia
holstein407	SRR14765382	SAMN19491810	PRJNA431934	Australia
holstein413	SRR14765383	SAMN19491811	PRJNA431934	Australia
holstein426	SRR14765381	SAMN19491812	PRJNA431934	Australia
holstein430	SRR14765379	SAMN19491813	PRJNA431934	Australia
holstein399	SRR14765377	SAMN19491814	PRJNA431934	Australia
holstein427	SRR14765376	SAMN19491815	PRJNA431934	Australia
holstein416	SRR14765375	SAMN19491816	PRJNA431934	Australia
holstein447	SRR14765374	SAMN19491817	PRJNA431934	Australia
holstein382	SRR14765373	SAMN19491818	PRJNA431934	Australia
holstein378	SRR14765372	SAMN19491819	PRJNA431934	Australia
holstein421	SRR14765368	SAMN19491820	PRJNA431934	Australia
holstein367	SRR14765367	SAMN19491821	PRJNA431934	Australia
holstein383	SRR14765364	SAMN19491822	PRJNA431934	Australia
holstein377	SRR14765366	SAMN19491823	PRJNA431934	Australia
holstein512	SRR15373745	SAMN20600132	PRJNA752483	China
holstein512	SRR15373751	SAMN20600132	PRJNA752483	China
holstein513	SRR15373744	SAMN20600133	PRJNA752483	China
holstein507	SRR15373743	SAMN20600134	PRJNA752483	China
holstein508	SRR15373742	SAMN20600135	PRJNA752483	China
holstein509	SRR15373755	SAMN20600136	PRJNA752483	China
holstein509	SRR15373741	SAMN20600136	PRJNA752483	China
holstein510	SRR15373754	SAMN20600137	PRJNA752483	China
holstein506	SRR15373747	SAMN20600138	PRJNA752483	China
holstein511	SRR15373746	SAMN20600139	PRJNA752483	China
holstein519	SRR16937328	SAMN23100781	PRJNA780021	Canada
holstein520	SRR16937327	SAMN23100782	PRJNA780021	Canada
holstein514	SRR16937316	SAMN23100783	PRJNA780021	Canada
holstein532	SRR16937312	SAMN23100784	PRJNA780021	Canada
holstein536	SRR16937311	SAMN23100785	PRJNA780021	Canada
holstein527	SRR16937310	SAMN23100786	PRJNA780021	Canada
holstein518	SRR16937309	SAMN23100787	PRJNA780021	Canada
holstein533	SRR16937308	SAMN23100788	PRJNA780021	Canada
holstein516	SRR16937307	SAMN23100789	PRJNA780021	Canada
holstein521	SRR16937306	SAMN23100790	PRJNA780021	Canada
holstein535	SRR16937326	SAMN23100791	PRJNA780021	Canada
holstein525	SRR16937325	SAMN23100792	PRJNA780021	Canada
holstein522	SRR16937324	SAMN23100793	PRJNA780021	Canada
holstein524	SRR16937323	SAMN23100794	PRJNA780021	Canada
holstein517	SRR16937322	SAMN23100795	PRJNA780021	Canada
holstein515	SRR16937321	SAMN23100796	PRJNA780021	Canada
holstein534	SRR16937320	SAMN23100797	PRJNA780021	Canada
holstein523	SRR16937319	SAMN23100798	PRJNA780021	Canada
holstein530	SRR16937318	SAMN23100799	PRJNA780021	Canada
holstein526	SRR16937317	SAMN23100800	PRJNA780021	Canada
holstein528	SRR16937315	SAMN23100801	PRJNA780021	Canada
holstein531	SRR16937314	SAMN23100802	PRJNA780021	Canada
holstein529	SRR16937313	SAMN23100803	PRJNA780021	Canada
holstein543	SRR21864759	SAMN31245942	PRJNA889458	Ireland
holstein546	SRR21864758	SAMN31245943	PRJNA889458	Ireland
holstein548	SRR21864757	SAMN31245944	PRJNA889458	Ireland
holstein542	SRR21864782	SAMN31245945	PRJNA889458	Ireland
holstein544	SRR21864781	SAMN31245946	PRJNA889458	Ireland
holstein549	SRR21864780	SAMN31245947	PRJNA889458	Ireland
holstein541	SRR21864779	SAMN31245948	PRJNA889458	Ireland
holstein537	SRR21864778	SAMN31245949	PRJNA889458	Ireland
holstein540	SRR21864777	SAMN31245950	PRJNA889458	Ireland
holstein547	SRR21864776	SAMN31245951	PRJNA889458	Ireland
holstein538	SRR21864775	SAMN31245952	PRJNA889458	Ireland
holstein545	SRR21864774	SAMN31245953	PRJNA889458	Ireland
holstein539	SRR21864773	SAMN31245954	PRJNA889458	Ireland
holstein550	SRR21864771	SAMN31245955	PRJNA889458	Ireland

## Sheet: S1B_BosSINEL_polymorphism
Table S1B List of BosSINEL loci with potential insertion polymorphism detected by TypeSINE
loci	TEname	count_1_percent	count_0_percent	count_1	count_0	count_1/1	count_1/0	count_0/0	count_NA	holstein1	holstein2	holstein3	holstein4	holstein5	holstein6	holstein7	holstein8	holstein9	holstein10	holstein11	holstein12	holstein13	holstein14	holstein15	holstein16	holstein17	holstein18	holstein19	holstein20	holstein21	holstein22	holstein23	holstein24	holstein25	holstein26	holstein27	holstein28	holstein29	holstein30	holstein31	holstein32	holstein33	holstein34	holstein35	holstein36	holstein37	holstein38	holstein39	holstein40
NC_037328.1:182030-182295(+)	BosSINEL	54.17	45.83	572	484	47	478	3	8	1/0	1/0	1/0	1/0	1/0	1/1	1/0	1/1	1/0	1/0	1/0	1/0	1/0	1/0	1/0	1/0	1/0	1/0	1/0	1/0	1/0	1/0	1/0	1/0	1/0	1/0	1/0	1/0	1/0	1/0	1/0	1/0	1/0	1/0	1/0	1/0	1/0	1/1	1/0	1/0
NC_037328.1:257090-257365(-)	BosSINEL	62	38	656	402	127	402	0	7	1/0	1/0	1/0	1/0	1/0	1/0	1/1	1/0	1/1	1/1	1/0	1/1	1/0	1/1	1/1	1/1	1/1	1/1	1/1	1/0	1/0	1/0	1/1	1/0	1/0	1/0	1/0	1/0	1/0	1/0	1/0	1/0	1/0	1/1	1/1	1/1	1/0	1/0	1/0	1/0
NC_037328.1:413211-413460(+)	BosSINEL	50	50	530	530	0	530	0	6	1/0	1/0	1/0	1/0	1/0	1/0	1/0	1/0	1/0	1/0	1/0	1/0	1/0	1/0	1/0	1/0	1/0	1/0	1/0	1/0	1/0	1/0	1/0	1/0	1/0	1/0	1/0	1/0	1/0	1/0	1/0	1/0	1/0	1/0	1/0	1/0	1/0	1/0	1/0	1/0
NC_037328.1:721213-721489(+)	BosSINEL	65.85	34.15	698	362	176	346	8	6	1/1	1/0	1/0	1/1	1/0	1/1	1/0	1/0	1/1	1/0	1/0	1/1	1/0	1/0	1/0	1/0	1/0	1/0	1/0	1/0	1/1	1/0	1/0	1/1	1/1	1/1	1/1	1/0	1/0	1/0	1/0	1/0	1/0	1/0	1/0	1/0	1/0	1/0	1/0	1/0
NC_037328.1:726297-726573(+)	BosSINEL	50	50	534	534	5	524	5	2	1/0	1/0	1/0	1/0	1/0	1/0	1/0	1/0	1/0	1/0	1/0	1/0	1/0	1/0	1/0	1/0	1/0	1/0	1/0	1/0	1/0	1/0	1/0	1/0	1/0	1/0	1/0	1/0	1/0	1/0	1/0	1/0	1/0	1/0	1/0	1/0	1/0	1/0	1/0	1/0
NC_037328.1:746234-746510(-)	BosSINEL	54.5	45.5	581	485	53	475	5	3	1/0	1/0	1/0	1/0	1/0	1/0	1/0	1/0	1/0	1/0	1/0	1/0	1/0	1/0	1/0	1/0	1/0	1/0	1/0	1/0	1/0	1/0	1/0	1/0	1/0	1/0	1/0	1/0	1/0	1/0	1/0	1/0	1/0	1/0	1/0	1/0	1/0	1/0	1/0	1/0
NC_037328.1:1168986-1169193(+)	BosSINEL	57.8	42.2	615	449	83	449	0	4	1/0	1/0	1/0	1/0	1/0	1/0	1/0	1/0	1/0	1/1	1/1	1/1	1/0	1/1	1/0	1/0	1/0	1/0	1/0	1/0	1/0	1/0	1/1	1/0	1/0	1/0	1/0	1/0	1/0	1/0	1/0	1/0	1/0	1/0	1/0	1/0	1/0	1/0	1/0	1/0
NC_037328.1:1509605-1509879(+)	BosSINEL	49.72	50.28	531	537	4	523	7	2	1/0	1/0	1/0	1/0	1/0	1/0	1/0	1/0	1/0	1/0	1/0	1/0	1/0	1/0	1/0	1/0	1/0	1/0	1/0	1/0	1/0	1/0	1/0	1/0	1/0	1/0	1/0	1/0	1/0	1/0	1/0	1/0	1/0	1/0	1/0	1/0	1/0	1/0	1/0	1/0
NC_037328.1:3342004-3342280(+)	BosSINEL	84.98	15.02	894	158	373	148	5	10	1/0	1/1	1/1	1/0	1/0	1/1	1/1	1/1	1/0	1/1	1/1	1/1	1/1	1/1	1/1	1/1	1/0	1/1	1/1	1/0	1/0	1/0	1/1	1/1	1/1	1/1	1/1	1/1	1/1	1/0	1/1	1/1	1/1	1/1	1/1	1/1	1/1	1/1	1/1	1/0
NC_037328.1:3877909-3878184(-)	BosSINEL	72.17	27.83	765	295	238	289	3	6	1/1	1/0	1/0	1/1	1/1	1/0	1/0	1/0	1/0	1/1	1/1	1/0	1/1	1/0	1/0	1/0	1/0	1/0	1/1	1/0	1/1	1/0	1/0	1/0	1/1	1/0	1/1	1/0	1/0	1/0	1/0	1/0	1/1	1/1	1/0	1/0	1/1	1/0	1/1	1/1
NC_037328.1:4028565-4028840(-)	BosSINEL	48.88	51.12	522	546	1	520	13	2	1/0	1/0	1/0	1/0	1/0	1/0	1/0	1/0	1/0	1/0	1/0	1/0	1/0	1/0	1/0	1/0	1/0	1/0	1/0	1/0	1/0	1/0	1/0	1/0	1/0	1/0	1/0	1/0	1/0	1/0	1/0	1/0	1/0	1/0	1/0	1/0	1/0	1/0	1/0	1/0
NC_037328.1:4135354-4135630(-)	BosSINEL	56.5	43.5	600	462	82	436	13	5	1/0	1/0	1/0	1/0	1/1	1/1	1/0	1/0	1/0	1/0	1/0	1/1	1/0	1/0	1/0	1/0	1/0	1/0	1/0	1/0	1/1	1/1	1/0	1/0	1/0	1/0	1/0	1/0	1/0	1/0	1/0	1/0	1/0	1/0	1/0	1/0	1/0	1/0	1/0	1/0
NC_037328.1:4830418-4830682(+)	BosSINEL	50.47	49.53	539	529	11	517	6	2	1/0	1/0	1/0	1/0	1/0	1/0	1/0	1/0	1/0	1/0	1/0	1/0	1/0	1/0	1/0	1/0	1/0	1/0	1/0	1/0	1/0	1/0	1/0	1/0	1/0	1/0	1/0	1/0	1/0	1/0	1/0	1/0	1/0	1/0	1/0	1/0	1/0	1/0	1/0	1/0
NC_037328.1:5421414-5421473(+)	BosSINEL	51.22	48.78	544	518	13	518	0	5	1/0	1/0	1/0	1/0	1/0	1/0	1/0	1/0	1/0	1/0	1/0	1/0	1/0	1/0	1/0	1/0	1/0	1/0	1/0	1/0	1/0	1/0	1/0	1/0	1/0	1/0	1/0	1/0	1/0	1/0	1/0	1/0	1/0	1/0	1/0	1/0	1/0	1/0	1/0	1/0
NC_037328.1:6060017-6060293(-)	BosSINEL	69.68	30.32	740	322	210	320	1	5	1/0	1/0	1/0	1/0	1/0	1/0	1/1	1/1	1/1	1/0	1/0	1/0	1/0	1/1	1/1	1/0	1/0	1/0	1/0	1/0	1/1	1/0	1/0	1/0	1/1	1/1	1/1	1/0	1/1	1/0	1/0	1/0	1/0	1/0	1/1	1/0	1/1	1/0	1/1	1/1
NC_037328.1:6877630-6877883(-)	BosSINEL	55.97	44.03	591	465	71	449	8	8	1/0	1/0	1/0	1/0	1/0	1/0	1/0	1/0	1/0	1/0	1/1	1/1	1/0	1/0	1/0	1/0	1/0	1/0	1/0	1/0	1/0	1/0	1/0	1/0	1/0	1/0	1/1	1/0	1/0	1/0	1/0	1/0	1/0	1/0	1/0	1/0	1/0	1/0	1/0	1/1
NC_037328.1:7281437-7281708(+)	BosSINEL	49.06	50.94	523	543	0	523	10	3	1/0	1/0	1/0	1/0	1/0	1/0	1/0	1/0	1/0	1/0	1/0	1/0	1/0	1/0	1/0	1/0	1/0	1/0	1/0	1/0	1/0	1/0	1/0	1/0	1/0	1/0	1/0	1/0	1/0	1/0	1/0	1/0	1/0	1/0	1/0	1/0	1/0	1/0	1/0	1/0
NC_037328.1:7763876-7764150(+)	BosSINEL	51.13	48.87	543	519	21	501	9	5	1/0	1/0	1/0	1/0	1/0	1/0	1/0	1/0	1/0	1/0	1/0	1/0	1/0	1/0	1/0	1/0	1/0	1/0	1/0	1/0	1/0	1/0	1/0	1/0	1/0	1/0	1/0	1/0	1/0	1/0	1/0	1/0	1/0	1/0	1/0	1/0	1/0	1/0	1/0	1/0
NC_037328.1:8175622-8175820(+)	BosSINEL	50.38	49.62	537	529	6	525	2	3	1/0	1/0	1/0	1/0	1/0	1/0	1/0	1/0	1/0	1/0	1/0	1/0	1/0	1/0	1/0	1/0	1/0	1/0	1/0	1/0	1/0	1/0	1/0	1/0	1/0	1/0	1/0	1/0	1/0	1/0	1/0	1/0	1/0	1/0	1/0	1/0	1/0	1/0	1/0	1/0
NC_037328.1:8202502-8202777(+)	BosSINEL	53.46	46.54	571	497	37	497	0	2	1/0	1/0	1/0	1/0	1/0	1/0	1/0	1/0	1/0	1/0	1/0	1/0	1/0	1/0	1/0	1/0	1/0	1/0	1/0	1/0	1/0	1/0	1/0	1/0	1/0	1/0	1/0	1/0	1/1	1/0	1/0	1/0	1/0	1/0	1/0	1/0	1/0	1/0	1/0	1/0
NC_037328.1:9535866-9536141(-)	BosSINEL	49.63	50.37	532	540	6	520	10	0	1/0	1/0	1/0	1/0	1/0	1/0	1/0	1/0	1/0	1/0	1/0	1/0	1/0	1/0	1/0	1/0	1/0	1/0	1/0	1/0	1/0	1/0	1/0	1/0	1/0	1/0	1/0	1/0	1/0	1/0	1/0	1/0	1/0	1/0	1/0	1/0	1/0	1/0	1/0	1/0
NC_037328.1:9536933-9537067(-)	BosSINEL	74.76	25.24	785	265	262	261	2	11	1/1	1/1	1/0	1/0	1/1	1/1	1/1	1/0	1/1	1/0	1/0	1/0	1/1	1/0	1/1	1/1	1/0	1/1	1/1	1/0	1/0	1/1	1/0	1/1	1/1	1/0	1/1	1/0	1/1	1/0	1/1	1/0	1/0	1/1	1/0	1/1	1/1	1/0	1/1	1/1
NC_037328.1:9758188-9758445(+)	BosSINEL	80.7	19.3	857	205	329	199	3	5	1/1	1/0	1/0	1/0	1/1	1/1	1/0	1/0	1/0	1/1	1/1	1/1	1/1	1/0	1/0	1/1	1/1	1/1	1/1	1/1	1/1	1/0	1/0	1/0	1/1	1/0	1/0	1/1	1/0	1/1	1/0	1/0	1/0	1/0	1/0	1/0	1/0	1/1	1/0	1/0
NC_037328.1:10321634-10321908(-)	BosSINEL	67.84	32.16	715	339	190	335	2	9	1/0	1/1	1/0	1/0	1/0	1/0	1/0	1/0	1/0	1/1	1/0	1/0	1/0	1/0	1/0	1/0	1/0	1/0	1/0	1/1	1/0	1/1	1/1	1/0	1/0	1/0	1/1	1/0	1/1	1/1	1/0	1/1	1/0	1/1	1/0	1/1	1/0	1/1	1/1	1/0
NC_037328.1:10322296-10322494(-)	BosSINEL	49.63	50.37	530	538	0	530	4	2	1/0	1/0	1/0	1/0	1/0	1/0	1/0	1/0	1/0	1/0	1/0	1/0	1/0	1/0	1/0	1/0	1/0	1/0	1/0	1/0	1/0	1/0	1/0	1/0	1/0	1/0	1/0	1/0	1/0	1/0	1/0	1/0	1/0	1/0	1/0	1/0	1/0	1/0	1/0	1/0
NC_037328.1:10922655-10922776(+)	BosSINEL	65.44	34.56	695	367	165	365	1	5	1/0	1/0	1/0	1/0	1/1	1/0	1/0	1/1	1/1	1/1	1/0	1/0	1/0	1/0	1/0	1/0	1/1	1/0	1/1	1/1	1/0	1/0	1/0	1/0	1/0	1/1	1/0	1/0	1/0	1/0	1/0	1/0	1/0	1/1	1/0	1/0	1/0	1/0	1/0	1/0
NC_037328.1:11712544-11712675(-)	BosSINEL	50.28	49.72	537	531	10	517	7	2	1/0	1/0	1/0	1/0	1/0	1/0	1/0	1/0	1/0	1/0	1/0	1/0	1/0	1/0	1/0	1/0	1/0	1/0	1/0	1/0	1/0	1/0	1/0	1/0	1/0	1/0	1/0	1/0	1/0	1/0	1/0	1/0	1/0	1/0	1/0	1/0	1/0	1/0	1/0	1/0
NC_037328.1:12055205-12055338(-)	BosSINEL	58	42	616	446	94	428	9	5	1/1	1/1	1/1	1/0	1/0	NA	1/0	1/0	1/0	1/0	1/0	1/0	1/0	1/0	1/1	1/0	1/0	1/0	1/0	1/0	1/1	1/0	1/0	1/1	1/0	1/0	1/0	1/0	1/0	1/0	1/0	1/0	1/0	1/0	1/1	1/0	1/0	1/0	1/1	1/0
NC_037328.1:12384896-12385047(+)	BosSINEL	49.81	50.19	534	538	0	534	2	0	1/0	1/0	1/0	1/0	1/0	1/0	1/0	1/0	1/0	1/0	1/0	1/0	1/0	1/0	1/0	1/0	1/0	1/0	1/0	1/0	1/0	1/0	1/0	1/0	1/0	1/0	1/0	1/0	1/0	1/0	1/0	1/0	1/0	1/0	1/0	1/0	1/0	1/0	1/0	1/0
NC_037328.1:13391830-13391955(+)	BosSINEL	50.19	49.81	533	529	6	521	4	5	1/0	1/0	1/0	1/0	1/0	1/0	1/0	1/0	1/0	1/0	1/0	1/0	1/0	1/0	1/0	1/0	1/0	1/0	1/0	1/0	1/0	1/0	1/0	1/0	1/0	1/0	1/0	1/0	1/0	1/0	1/0	1/0	1/0	1/0	1/0	1/0	1/0	1/0	1/0	1/0
NC_037328.1:14079861-14079987(-)	BosSINEL	82.49	17.51	876	186	346	184	1	5	1/1	1/0	1/0	1/1	1/0	1/0	1/1	1/1	1/1	1/1	1/1	1/1	1/0	1/1	1/1	1/1	1/1	1/0	1/0	1/1	1/0	1/0	1/1	1/1	1/1	1/1	1/0	1/1	1/0	1/0	1/0	1/0	1/0	1/1	1/0	1/0	1/1	1/0	1/0	1/1
NC_037328.1:14212755-14212882(+)	BosSINEL	49.91	50.09	533	535	0	533	1	2	1/0	1/0	1/0	1/0	1/0	1/0	1/0	1/0	1/0	1/0	1/0	1/0	1/0	1/0	1/0	1/0	1/0	1/0	1/0	1/0	1/0	1/0	1/0	1/0	1/0	1/0	1/0	1/0	1/0	1/0	1/0	1/0	1/0	1/0	1/0	1/0	1/0	1/0	1/0	1/0
NC_037328.1:14394934-14395201(+)	BosSINEL	78.71	21.29	839	227	310	219	4	3	1/1	1/1	1/1	1/1	1/0	1/0	1/1	1/0	1/0	1/0	1/0	1/1	1/0	1/1	1/0	1/0	1/0	1/0	1/1	1/0	1/0	1/0	1/0	1/0	1/0	1/0	1/1	1/0	1/0	1/0	1/1	1/0	1/0	1/1	1/0	1/1	1/1	1/1	1/1	1/0
NC_037328.1:15527740-15528016(+)	BosSINEL	76.98	23.02	816	244	288	240	2	6	1/0	1/1	1/1	1/1	1/0	1/1	1/1	1/1	1/1	1/1	1/1	1/1	1/0	1/0	1/0	1/1	1/0	1/0	1/0	1/0	1/0	1/0	1/0	1/0	1/0	1/0	1/0	1/0	1/0	1/0	1/0	1/0	1/1	1/1	1/1	1/1	1/0	1/1	1/1	1/0
NC_037328.1:16890662-16890933(-)	BosSINEL	48.41	51.59	517	551	0	517	17	2	1/0	1/0	1/0	1/0	1/0	1/0	1/0	1/0	1/0	1/0	1/0	1/0	1/0	1/0	1/0	1/0	1/0	1/0	1/0	1/0	1/0	1/0	1/0	1/0	1/0	1/0	1/0	1/0	1/0	1/0	1/0	1/0	1/0	1/0	1/0	1/0	1/0	1/0	1/0	1/0
NC_037328.1:19240723-19240998(-)	BosSINEL	49.07	50.93	525	545	0	525	10	1	1/0	1/0	1/0	1/0	1/0	1/0	1/0	1/0	1/0	1/0	1/0	1/0	1/0	1/0	1/0	1/0	1/0	1/0	1/0	1/0	1/0	1/0	1/0	1/0	1/0	1/0	1/0	1/0	1/0	1/0	1/0	1/0	1/0	1/0	1/0	1/0	1/0	1/0	1/0	1/0
NC_037328.1:19311971-19312246(-)	BosSINEL	49.91	50.09	533	535	5	523	6	2	1/0	1/0	1/0	1/0	1/0	1/0	1/0	1/0	1/0	1/0	1/0	1/0	1/0	1/0	1/0	1/0	1/0	1/0	1/0	1/0	1/0	1/0	1/0	1/0	1/0	1/0	1/0	1/0	1/0	1/0	1/0	1/0	1/0	1/0	1/0	1/0	1/0	1/0	1/0	1/0
NC_037328.1:19784902-19785175(+)	BosSINEL	88.19	11.81	933	125	407	119	3	7	1/1	1/0	1/1	1/1	1/1	1/1	1/1	1/1	1/1	1/1	1/1	1/0	1/1	1/1	1/1	1/1	1/1	1/1	1/1	1/1	1/1	1/1	1/1	1/1	1/1	1/1	1/1	1/1	1/0	1/1	1/1	1/0	1/1	1/1	1/1	1/0	1/1	1/1	1/1	1/1
NC_037328.1:20614162-20614434(-)	BosSINEL	85.75	14.25	909	151	379	151	0	6	1/1	1/1	1/1	1/1	1/1	1/0	1/0	1/1	1/1	1/0	1/1	1/0	1/0	1/1	1/0	1/1	1/0	1/0	1/1	1/1	1/0	1/1	1/1	1/1	1/0	1/1	1/0	1/0	1/1	1/0	1/1	1/1	1/0	1/1	1/0	1/1	1/0	1/0	1/0	1/0
NC_037328.1:21114461-21114640(+)	BosSINEL	57.49	42.51	614	454	83	448	3	2	1/0	1/0	1/0	1/0	1/1	1/0	1/1	1/0	1/1	1/0	1/0	1/0	1/1	1/0	1/0	1/1	1/0	1/0	1/0	1/0	1/0	1/0	1/0	1/1	1/0	1/0	1/0	1/0	1/1	1/0	1/0	1/0	1/0	1/0	1/1	1/0	1/0	1/0	1/1	1/0
NC_037328.1:21569747-21570024(-)	BosSINEL	70.79	29.21	749	309	229	291	9	7	1/1	1/1	1/1	1/1	1/0	1/0	1/0	1/0	1/0	1/0	1/0	1/0	1/0	1/0	1/0	1/0	1/0	1/1	1/0	1/0	1/0	1/0	1/0	1/0	1/0	1/0	1/0	1/0	1/0	1/0	1/0	1/0	1/1	1/0	1/0	1/0	1/0	1/1	1/0	1/0
NC_037328.1:22837168-22837441(+)	BosSINEL	78.86	21.14	828	222	306	216	3	11	1/0	1/0	1/1	1/0	1/1	1/1	1/0	1/0	1/0	1/1	1/1	1/1	1/1	1/1	1/0	1/0	1/1	1/0	1/0	1/1	1/0	1/1	1/0	1/1	1/0	1/1	1/0	1/0	1/0	1/1	1/0	1/0	0/0	1/1	1/0	1/0	1/1	1/0	1/0	1/1
NC_037328.1:23259935-23259987(+)	BosSINEL	49.53	50.47	528	538	8	512	13	3	1/0	1/0	1/0	1/0	1/0	1/0	1/0	1/0	1/0	1/0	1/0	1/0	1/0	1/0	1/0	1/0	1/0	1/0	1/0	1/0	1/0	1/0	1/0	1/0	1/0	1/0	1/0	1/0	1/0	1/0	1/0	1/0	1/0	1/0	1/0	1/0	1/0	1/0	1/0	1/0
NC_037328.1:25552483-25552756(+)	BosSINEL	53.59	46.41	567	491	42	483	4	7	1/0	1/0	1/0	1/0	1/0	1/0	1/0	1/0	1/0	1/0	1/0	1/0	1/0	1/0	1/0	1/0	1/0	1/0	1/0	1/0	1/0	1/0	1/0	1/0	1/0	1/0	1/0	1/0	1/0	1/0	1/0	1/0	1/0	1/0	1/0	1/0	1/0	1/0	1/0	1/0
NC_037328.1:25996947-25997220(-)	BosSINEL	69.83	30.17	743	321	215	313	4	4	1/1	1/1	1/0	1/1	1/1	1/0	1/0	1/0	1/1	1/0	1/0	1/0	1/0	1/1	1/1	1/0	1/1	1/1	1/0	1/1	1/1	1/0	1/0	1/0	1/0	1/1	1/0	1/0	1/0	1/0	1/0	1/1	1/0	1/0	1/1	1/0	1/0	1/0	1/0	1/0
NC_037328.1:26267300-26267567(-)	BosSINEL	49.25	50.75	526	542	0	526	8	2	1/0	1/0	1/0	1/0	1/0	1/0	1/0	1/0	1/0	1/0	1/0	1/0	1/0	1/0	1/0	1/0	1/0	1/0	1/0	1/0	1/0	1/0	1/0	1/0	1/0	1/0	1/0	1/0	1/0	1/0	1/0	1/0	1/0	1/0	1/0	1/0	1/0	1/0	1/0	1/0
NC_037328.1:26409569-26409844(-)	BosSINEL	82.35	17.65	868	186	343	182	2	9	1/1	1/1	1/1	1/1	1/1	1/1	1/1	1/0	1/0	1/0	1/0	1/0	1/0	1/0	1/1	1/0	1/1	1/0	1/0	1/1	1/1	1/1	1/1	1/1	1/0	1/1	1/0	1/0	1/1	1/0	1/1	1/0	1/0	1/0	1/0	1/0	1/1	1/1	1/0	1/0
NC_037328.1:26894297-26894566(-)	BosSINEL	81.34	18.66	859	197	331	197	0	8	1/1	1/1	1/1	1/0	1/1	1/0	1/0	1/1	1/1	1/1	1/1	1/1	1/1	1/0	1/0	1/0	1/1	1/1	1/1	1/1	1/1	1/1	1/1	1/1	1/1	1/0	1/1	1/1	1/1	1/1	1/1	1/1	1/0	1/1	1/1	1/1	1/1	1/0	1/0	1/0
NC_037328.1:27175191-27175468(-)	BosSINEL	49.81	50.19	532	536	2	528	4	2	1/0	1/0	1/0	1/0	1/0	1/0	1/0	1/0	1/0	1/0	1/0	1/0	1/0	1/0	1/0	1/0	1/0	1/0	1/0	1/0	1/0	1/0	1/0	1/0	1/0	1/0	1/0	1/0	1/0	1/0	1/0	1/0	1/0	1/0	1/0	1/0	1/0	1/0	1/0	1/0
NC_037328.1:30347031-30347302(-)	BosSINEL	74.95	25.05	793	265	265	263	1	7	1/1	1/1	1/1	1/0	1/0	1/0	1/1	1/0	1/0	1/1	1/1	1/0	1/1	1/0	1/1	1/0	1/0	1/0	1/0	1/1	1/0	1/0	1/0	1/0	1/0	1/1	1/0	1/0	1/0	1/0	1/0	1/0	1/0	1/0	1/0	1/1	1/1	1/0	1/0	1/0
NC_037328.1:30499311-30499579(-)	BosSINEL	49.63	50.37	532	540	3	526	7	0	1/0	1/0	1/0	1/0	1/0	1/0	1/0	1/0	1/0	1/0	1/0	1/0	1/0	1/0	1/0	1/0	1/0	1/0	1/0	1/0	1/0	1/0	1/0	1/0	1/0	1/0	1/0	1/0	1/0	1/0	1/0	1/0	1/0	1/0	1/0	1/0	1/0	1/0	1/0	1/0
NC_037328.1:30521271-30521546(+)	BosSINEL	60.86	39.14	650	418	121	408	5	2	1/1	1/1	1/0	1/1	1/0	1/0	1/0	1/0	1/0	1/0	1/0	1/0	1/0	1/0	1/0	1/0	1/0	1/0	1/0	1/0	1/0	1/0	1/0	1/0	1/0	1/0	1/0	1/0	1/0	1/0	1/0	1/0	1/0	1/0	1/0	1/0	1/0	1/0	1/0	1/0
NC_037328.1:30721933-30722209(+)	BosSINEL	67.08	32.92	707	347	187	333	7	9	1/1	1/1	1/0	1/1	1/0	1/0	1/0	1/0	1/0	1/0	1/0	1/0	1/0	1/1	1/0	1/0	1/0	1/0	1/0	1/0	1/0	1/1	1/1	1/0	1/1	1/0	1/1	1/1	1/0	1/0	1/0	1/0	1/1	1/0	1/1	1/1	1/0	1/0	1/0	1/0
NC_037328.1:31117025-31117299(-)	BosSINEL	51.88	48.12	551	511	26	499	6	5	1/0	1/0	1/0	1/0	1/1	1/0	1/0	1/0	1/0	1/0	1/0	1/0	1/0	1/0	1/0	1/0	1/0	1/0	1/0	1/1	1/1	1/0	1/1	1/0	1/0	1/0	1/0	1/0	1/0	1/0	1/0	1/0	1/0	1/0	1/0	1/0	1/0	1/0	1/1	1/0
NC_037328.1:32726243-32726493(-)	BosSINEL	52.25	47.75	558	510	26	506	2	2	1/0	1/0	1/0	1/0	1/0	1/0	1/0	1/0	1/0	1/0	1/0	1/0	1/0	1/0	1/0	1/0	1/0	1/0	1/0	1/0	1/0	1/0	1/0	1/0	1/0	1/0	1/0	1/0	1/0	1/0	1/0	1/0	1/0	1/0	1/0	1/0	1/0	1/0	1/0	1/0
NC_037328.1:35234584-35234656(-)	BosSINEL	41.82	58.18	409	569	65	279	145	47	NA	1/0	0/0	1/0	1/0	1/1	1/0	1/0	NA	1/0	0/0	1/0	1/1	1/0	1/0	NA	1/0	1/1	1/0	1/0	NA	1/1	1/0	1/0	0/0	1/1	1/0	1/0	1/0	0/0	1/0	1/0	1/0	1/0	1/0	0/0	1/0	0/0	1/0	1/1
NC_037328.1:35817421-35817529(+)	BosSINEL	49.07	50.93	526	546	0	526	10	0	1/0	1/0	1/0	1/0	1/0	1/0	1/0	1/0	1/0	1/0	1/0	1/0	1/0	1/0	1/0	1/0	1/0	1/0	1/0	1/0	1/0	1/0	1/0	1/0	1/0	1/0	1/0	1/0	1/0	1/0	1/0	1/0	1/0	1/0	1/0	1/0	1/0	1/0	1/0	1/0
NC_037328.1:36320569-36320804(-)	BosSINEL	72.33	27.67	771	295	242	287	4	3	1/0	1/1	1/1	1/0	1/1	1/1	1/1	1/1	1/1	1/1	1/0	1/1	1/0	1/0	1/1	1/1	1/0	1/0	1/1	1/1	1/1	1/0	1/0	1/1	1/0	1/1	1/1	1/1	1/1	1/1	1/1	1/1	1/0	1/1	1/0	1/0	1/0	1/0	1/0	1/0
NC_037328.1:36729890-36730162(-)	BosSINEL	51.87	48.13	554	514	24	506	4	2	1/0	1/0	1/0	1/0	1/0	1/0	1/0	1/0	1/0	1/0	1/0	1/0	1/0	1/0	1/0	1/0	1/0	1/0	1/0	1/0	1/0	1/0	1/0	1/0	1/1	1/0	1/0	1/0	1/0	1/0	1/0	1/0	1/0	1/0	1/0	1/0	1/0	1/0	1/0	1/0
NC_037328.1:38388871-38388992(-)	BosSINEL	87.83	12.17	924	128	398	128	0	10	1/1	1/1	1/1	1/1	1/1	1/1	1/0	1/0	1/1	1/0	1/0	1/0	1/1	1/0	1/0	1/1	1/0	1/0	1/1	1/1	1/1	1/1	1/1	1/1	1/1	1/0	1/0	1/1	1/1	1/1	1/1	1/0	1/0	1/0	1/1	1/0	1/1	1/0	1/0	1/0
NC_037328.1:40119087-40119362(+)	BosSINEL	50.09	49.91	535	533	9	517	8	2	1/0	1/0	1/0	1/0	1/0	1/0	1/0	1/0	1/0	1/0	1/0	1/0	1/0	1/0	1/0	1/0	1/0	1/0	1/0	1/0	1/0	1/0	1/0	1/0	1/0	1/0	1/0	1/0	1/0	1/0	1/0	1/0	1/0	1/0	1/0	1/0	1/0	1/0	1/0	1/0
NC_037328.1:40250110-40250328(-)	BosSINEL	48.41	51.59	519	553	4	511	21	0	1/0	1/0	1/0	1/0	1/0	1/0	1/0	1/0	1/0	1/0	1/0	1/0	1/0	1/0	1/0	1/0	1/0	1/0	1/0	1/0	1/0	1/0	1/0	1/0	1/0	0/0	1/0	1/0	1/0	1/0	1/0	1/0	1/0	1/0	1/0	1/0	1/0	1/0	1/0	1/0
NC_037328.1:41142388-41142656(+)	BosSINEL	50.56	49.44	540	528	14	512	8	2	1/0	1/0	1/0	1/0	1/0	1/0	1/0	1/0	1/0	1/0	1/0	1/0	1/0	1/0	1/0	1/0	1/0	1/0	1/0	1/0	1/0	1/0	1/0	1/0	1/0	1/0	1/0	1/0	1/0	1/0	1/0	1/0	1/0	1/0	1/0	1/0	1/0	1/0	1/0	1/0
NC_037328.1:41410471-41410739(+)	BosSINEL	51.5	48.5	549	517	23	503	7	3	1/0	1/0	1/0	1/0	1/0	1/0	1/0	1/0	1/1	1/0	1/1	1/0	1/0	1/0	1/0	1/0	1/0	1/0	1/0	1/0	1/0	1/0	1/0	1/0	1/0	1/0	1/0	1/0	1/0	1/0	1/0	1/0	1/0	1/0	1/0	1/0	1/0	1/0	1/0	1/0
NC_037328.1:41501828-41502101(+)	BosSINEL	51.96	48.04	556	514	26	504	5	1	1/0	1/0	1/1	1/0	1/0	1/0	1/0	1/0	1/0	1/0	1/0	1/0	1/0	1/0	1/0	1/0	1/0	1/0	1/0	1/0	1/0	1/0	1/0	1/0	1/0	1/0	1/0	1/0	1/0	1/0	1/0	1/0	1/0	1/0	1/0	1/0	1/0	1/0	1/0	1/0
NC_037328.1:42094443-42094580(-)	BosSINEL	88.64	11.36	936	120	408	120	0	8	1/0	1/1	1/1	1/1	1/1	1/1	1/1	1/1	1/1	1/1	1/1	1/0	1/1	1/1	1/1	1/1	1/1	1/1	1/1	1/1	1/1	1/1	1/1	1/1	1/1	1/0	1/1	1/1	1/1	1/0	1/1	1/1	1/1	1/1	1/1	1/1	1/1	1/1	1/1	1/1
NC_037328.1:42622216-42622490(+)	BosSINEL	62.55	37.45	663	397	135	393	2	6	1/0	1/0	1/0	1/0	1/0	1/0	1/0	1/0	1/1	1/0	1/0	1/0	1/0	1/0	1/0	1/0	1/0	1/0	1/0	1/0	1/0	1/0	1/0	1/0	1/0	1/1	1/0	1/0	1/0	1/0	1/0	1/0	1/0	1/1	1/0	1/0	1/0	1/0	1/0	1/0
NC_037328.1:42761079-42761115(+)	BosSINEL	77.43	22.57	827	241	293	241	0	2	1/0	1/0	1/1	1/0	1/1	1/0	1/1	1/1	1/0	1/1	1/1	1/0	1/1	1/0	1/0	1/1	1/0	1/1	1/0	1/0	1/1	1/1	1/0	1/1	1/1	1/0	1/1	1/1	1/1	1/1	1/0	1/0	1/1	1/1	1/0	1/0	1/0	1/1	1/1	1/1
NC_037328.1:42768649-42768879(+)	BosSINEL	49.44	50.56	528	540	4	520	10	2	1/0	1/0	1/0	1/0	1/0	1/0	1/0	1/0	1/0	1/0	1/0	1/0	1/0	1/0	1/0	1/0	1/0	1/0	1/0	1/0	1/0	1/0	1/0	1/0	1/0	1/0	1/0	1/0	1/0	1/0	1/0	1/0	1/0	1/0	1/0	1/0	1/0	1/0	1/0	1/0
NC_037328.1:42770415-42770545(+)	BosSINEL	49.16	50.84	527	545	0	527	9	0	1/0	1/0	1/0	1/0	1/0	1/0	1/0	1/0	1/0	1/0	1/0	1/0	1/0	1/0	1/0	1/0	1/0	1/0	1/0	1/0	1/0	1/0	1/0	1/0	1/0	1/0	1/0	1/0	1/0	1/0	1/0	1/0	1/0	1/0	1/0	1/0	1/0	1/0	1/0	1/0
NC_037328.1:42794758-42795023(-)	BosSINEL	49.44	50.56	529	541	0	529	6	1	1/0	1/0	1/0	1/0	1/0	1/0	1/0	1/0	1/0	1/0	1/0	1/0	1/0	1/0	1/0	1/0	1/0	1/0	1/0	1/0	1/0	1/0	1/0	1/0	1/0	1/0	1/0	1/0	1/0	1/0	1/0	1/0	1/0	1/0	1/0	1/0	1/0	1/0	1/0	1/0
NC_037328.1:42949731-42950001(-)	BosSINEL	61.24	38.76	654	414	122	410	2	2	1/0	1/0	1/1	1/0	1/0	1/1	1/0	1/0	1/0	1/0	1/0	1/0	1/0	1/0	1/0	1/1	1/1	1/0	1/0	1/0	1/1	1/0	1/0	1/0	1/0	1/0	1/0	1/1	1/0	1/0	1/1	1/0	1/0	1/0	1/0	1/0	1/0	1/0	1/0	1/0
NC_037328.1:43418060-43418334(-)	BosSINEL	68.39	31.61	729	337	199	331	3	3	1/1	1/0	1/0	1/1	1/0	1/0	1/0	1/1	1/0	1/0	1/0	1/0	1/0	1/0	1/1	1/0	1/0	1/1	1/0	1/1	1/0	1/1	1/1	1/1	1/0	1/0	1/0	1/0	1/0	1/0	1/0	1/1	1/0	1/0	1/0	1/1	1/0	1/0	1/0	1/0
NC_037328.1:46138800-46139073(+)	BosSINEL	50.09	49.91	535	533	8	519	7	2	1/0	1/0	1/0	1/0	1/0	1/0	1/0	1/0	1/0	1/0	1/0	1/0	1/0	1/0	1/0	1/0	1/0	1/0	1/0	1/0	1/0	1/0	1/0	1/0	1/0	1/0	1/0	1/0	1/0	1/0	1/0	1/0	1/0	1/0	1/0	1/0	1/0	1/0	1/0	1/0
NC_037328.1:46407080-46407356(-)	BosSINEL	52.45	47.55	557	505	30	497	4	5	1/0	1/0	1/0	1/0	1/0	1/0	1/0	1/0	1/0	1/0	1/0	1/0	1/0	1/0	1/0	1/0	1/0	1/0	1/0	1/0	1/0	1/0	1/0	1/0	1/0	1/0	1/0	1/0	1/0	1/0	1/0	1/0	1/0	1/0	1/0	1/0	1/0	1/0	1/0	1/0
NC_037328.1:46717599-46717865(-)	BosSINEL	49.07	50.93	526	546	0	526	10	0	1/0	1/0	1/0	1/0	1/0	1/0	1/0	1/0	1/0	1/0	1/0	1/0	1/0	1/0	1/0	1/0	1/0	1/0	1/0	1/0	1/0	1/0	1/0	1/0	1/0	1/0	1/0	1/0	1/0	1/0	1/0	1/0	1/0	1/0	1/0	1/0	1/0	1/0	1/0	1/0
NC_037328.1:46962905-46963038(-)	BosSINEL	87.1	12.9	918	136	392	134	1	9	1/1	1/0	1/1	1/0	1/1	1/0	1/1	1/1	1/1	1/1	1/1	1/1	1/1	1/1	1/1	1/1	1/1	1/1	1/1	1/1	1/0	1/1	1/1	1/1	1/0	1/1	1/1	1/1	1/0	1/0	1/1	1/0	1/1	1/1	1/1	1/1	1/1	1/1	1/0	1/1
NC_037328.1:47886309-47886585(-)	BosSINEL	67.82	32.18	723	343	195	333	5	3	1/1	1/1	1/0	1/0	1/0	1/0	1/0	1/0	1/0	1/0	1/0	1/0	1/0	1/0	1/0	1/0	1/0	1/0	1/0	1/0	1/0	1/0	1/0	1/0	1/0	1/0	1/0	1/0	1/0	1/0	1/0	1/0	1/0	1/0	1/0	1/1	1/0	1/0	1/0	1/1
NC_037328.1:48036679-48036955(-)	BosSINEL	83.78	16.22	878	170	355	168	1	12	1/1	1/1	1/1	1/1	1/0	NA	1/1	1/1	1/0	1/1	1/0	1/1	1/1	1/1	1/1	1/1	1/1	1/1	1/0	1/1	1/0	1/1	1/0	1/0	1/0	1/0	1/1	1/1	1/1	1/0	1/1	1/0	1/1	1/1	1/1	1/1	1/1	1/1	1/1	1/1
NC_037328.1:48103837-48104112(-)	BosSINEL	77.4	22.6	822	240	292	238	1	5	1/1	1/0	1/0	1/0	1/1	1/0	1/0	1/1	1/1	1/1	1/0	1/1	1/0	1/0	1/1	1/1	1/1	1/0	1/0	1/1	1/1	1/1	1/1	1/0	1/1	1/0	1/0	1/0	1/0	1/1	1/1	1/0	1/0	1/0	1/1	1/0	1/0	1/1	1/1	1/0
NC_037328.1:48656953-48657227(-)	BosSINEL	54.43	45.57	577	483	64	449	17	6	1/0	1/0	1/0	1/0	1/0	1/0	1/0	1/0	1/0	1/0	1/0	1/0	1/0	1/0	1/0	1/0	1/0	1/1	1/0	1/0	1/0	1/0	1/0	1/0	1/0	1/0	1/0	1/0	1/0	1/0	1/1	1/0	1/0	1/0	1/0	1/0	1/0	1/0	1/0	0/0
NC_037328.1:49112890-49113161(-)	BosSINEL	49.44	50.56	529	541	0	529	6	1	1/0	1/0	1/0	1/0	1/0	1/0	1/0	1/0	1/0	1/0	1/0	1/0	1/0	1/0	1/0	1/0	1/0	1/0	1/0	1/0	1/0	1/0	1/0	1/0	1/0	1/0	1/0	1/0	1/0	1/0	1/0	1/0	1/0	1/0	1/0	1/0	1/0	1/0	1/0	1/0
NC_037328.1:49881969-49882240(+)	BosSINEL	84.75	15.25	895	161	368	159	1	8	1/0	1/1	1/0	1/0	1/1	1/0	1/1	1/0	1/1	1/1	1/1	1/1	1/0	1/1	1/1	1/0	1/1	1/1	1/1	1/1	1/1	1/1	1/1	1/1	1/1	1/0	1/1	1/0	1/1	1/0	1/0	1/0	1/1	1/1	1/1	1/1	1/0	1/1	1/1	1/1
NC_037328.1:50338001-50338269(+)	BosSINEL	57.61	42.39	613	451	86	441	5	4	1/0	1/0	1/0	1/0	1/0	1/0	1/0	1/0	1/0	1/0	1/0	1/0	1/0	1/0	1/0	1/1	1/0	1/0	1/0	1/1	1/0	1/0	1/0	1/0	1/0	1/0	1/0	1/0	1/0	1/0	1/0	1/0	1/0	1/1	1/0	1/0	1/0	1/0	1/0	1/0
NC_037328.1:52301895-52302451(-)	BosSINEL	69.36	30.64	738	326	206	326	0	4	1/0	1/0	1/0	1/0	1/1	1/0	1/0	1/1	1/0	1/0	1/0	1/0	1/0	1/0	1/0	1/1	1/0	1/0	1/1	1/0	1/1	1/0	1/1	1/0	1/0	1/1	1/0	1/0	1/1	1/1	1/0	1/0	1/1	1/0	1/0	1/1	1/1	1/0	1/1	1/0
NC_037328.1:53452228-53452498(+)	BosSINEL	51.6	48.4	547	513	21	505	4	6	1/0	1/0	1/0	1/0	1/1	1/0	1/0	1/0	1/1	1/0	1/0	1/0	1/0	1/0	1/0	1/0	1/0	1/0	1/0	1/0	1/0	1/0	1/0	1/0	1/0	1/0	1/0	1/0	1/0	1/0	1/0	1/0	1/0	1/0	1/0	1/0	1/0	1/0	1/0	1/0
NC_037328.1:53503998-53504274(-)	BosSINEL	72.61	27.39	774	292	242	290	1	3	1/1	1/0	1/1	1/0	1/1	1/0	1/1	1/0	1/0	1/1	1/1	1/1	1/0	1/1	1/1	1/1	1/0	1/0	1/0	1/1	1/0	1/0	1/1	1/0	1/1	1/0	1/0	1/0	1/1	1/0	1/0	1/1	1/0	1/0	1/0	1/0	1/0	1/0	1/0	1/0
NC_037328.1:54251096-54251373(-)	BosSINEL	52.9	47.1	565	503	36	493	5	2	1/0	1/0	1/0	1/0	1/0	1/0	1/0	1/0	1/0	1/0	1/0	1/0	1/0	1/0	1/0	1/0	1/0	1/0	1/0	1/0	1/0	1/0	1/0	1/0	1/0	1/0	1/0	1/0	0/0	1/0	1/0	1/0	1/0	1/0	1/0	1/0	1/0	1/0	1/0	1/0
NC_037328.1:54472448-54472721(-)	BosSINEL	50.28	49.72	537	531	10	517	7	2	1/0	1/0	1/0	1/0	1/0	1/0	1/0	1/0	1/0	1/0	1/0	1/0	1/0	1/0	1/0	1/0	1/0	1/0	1/0	1/0	1/0	1/0	1/0	1/0	1/0	1/0	1/0	1/0	1/0	1/0	1/0	1/0	1/0	1/0	1/0	1/0	1/0	1/0	1/0	1/0
NC_037328.1:54796722-54796991(+)	BosSINEL	69.64	30.36	702	306	207	288	9	32	1/0	1/0	1/0	1/0	1/0	1/0	1/1	1/1	1/1	1/0	0/0	1/1	1/1	1/1	1/0	NA	1/1	1/1	1/1	1/1	1/1	1/0	1/0	1/0	1/0	1/0	1/0	1/0	1/1	1/0	1/0	1/1	1/0	1/0	1/0	1/1	1/0	1/1	1/1	1/1
NC_037328.1:54845687-54845941(+)	BosSINEL	76.97	23.03	819	245	291	237	4	4	1/1	1/1	1/1	1/1	1/0	1/0	1/0	1/0	1/0	1/0	1/0	1/0	1/0	1/1	1/0	1/1	1/0	1/0	1/0	1/0	1/0	1/1	1/0	1/1	1/0	1/0	1/0	1/0	1/0	1/0	1/1	1/1	1/0	1/0	1/0	1/0	1/0	1/1	1/0	1/0
NC_037328.1:55401655-55401923(+)	BosSINEL	49.53	50.47	529	539	4	521	9	2	1/0	1/0	1/0	1/0	1/0	1/0	1/0	1/0	1/0	1/0	1/0	1/0	1/0	1/0	1/0	1/0	1/0	1/0	1/0	1/0	1/0	1/0	1/0	1/0	1/0	1/0	1/0	1/0	1/0	1/0	1/0	1/0	1/0	1/0	1/0	1/0	1/0	1/0	1/0	1/0
NC_037328.1:56161702-56161897(-)	BosSINEL	67.37	32.63	706	342	242	222	60	12	1/0	1/0	1/0	0/0	1/1	1/1	1/0	0/0	1/1	1/1	1/1	1/0	1/1	0/0	1/0	1/1	1/0	1/0	1/0	1/0	1/1	1/0	1/1	0/0	1/1	0/0	1/0	1/0	0/0	1/1	1/1	1/0	1/1	1/1	1/0	1/1	1/1	1/1	1/0	1/0
NC_037328.1:56817396-56817658(+)	BosSINEL	89.13	10.87	943	115	414	115	0	7	1/1	1/0	1/0	1/0	1/1	1/1	1/1	1/1	1/1	1/1	1/0	1/1	1/0	1/1	1/0	1/0	1/1	1/1	1/1	1/0	1/1	1/0	1/1	1/1	1/1	1/0	1/1	1/0	1/1	1/1	1/1	1/1	1/0	1/1	1/0	1/1	1/1	1/1	1/1	1/1
NC_037328.1:56983375-56983649(-)	BosSINEL	49.72	50.28	532	538	3	526	6	1	1/0	1/0	1/0	1/0	1/0	1/0	1/0	1/0	1/0	1/0	1/0	1/0	1/0	1/0	1/0	1/0	1/0	1/0	1/0	1/0	1/0	1/0	1/0	1/0	1/0	1/0	1/0	1/0	1/0	1/0	1/0	1/0	1/0	1/0	1/0	1/0	1/0	1/0	1/0	1/0
NC_037328.1:57091353-57091487(-)	BosSINEL	66.57	33.43	707	355	180	347	4	5	1/1	1/0	1/0	1/0	1/0	1/0	1/0	1/0	1/0	1/0	1/0	1/0	1/0	1/1	1/0	1/0	1/0	1/0	1/0	1/0	1/0	1/0	1/0	1/0	1/0	1/0	1/0	1/0	1/0	1/0	1/0	1/0	1/0	1/0	1/0	1/0	1/0	1/0	1/0	1/0
NC_037328.1:57231578-57231837(-)	BosSINEL	80.62	19.38	853	205	325	203	1	7	1/0	1/1	1/1	1/0	1/1	1/0	1/1	1/0	1/1	1/0	1/1	1/1	1/0	1/1	1/0	1/1	1/0	1/1	1/1	1/0	1/1	1/1	1/0	1/0	1/0	1/0	1/0	1/0	1/1	1/1	1/1	1/0	1/1	1/1	1/0	1/0	1/0	1/1	1/0	1/1
NC_037328.1:57429873-57430148(-)	BosSINEL	61.58	38.42	654	408	127	400	4	5	1/0	1/0	1/0	1/0	1/1	1/0	1/0	1/1	1/1	1/0	1/0	1/0	1/1	1/0	1/0	1/1	1/0	1/0	1/0	1/0	1/0	1/0	1/0	1/0	1/0	1/0	1/0	1/0	1/0	1/1	1/0	1/0	1/1	1/0	1/0	1/0	1/0	1/0	1/0	1/0
NC_037328.1:57607058-57607283(-)	BosSINEL	76.83	23.17	799	241	280	239	1	16	1/0	1/0	1/0	1/0	1/0	1/0	1/1	1/0	1/1	1/0	1/1	1/1	1/0	1/1	1/1	1/0	1/1	1/0	1/1	1/1	1/1	1/1	1/1	1/0	1/0	1/1	1/1	1/1	1/1	1/1	1/1	1/1	1/1	1/1	1/1	1/0	1/0	1/0	1/1	1/0
NC_037328.1:59156480-59156745(-)	BosSINEL	79.17	20.83	844	222	314	216	3	3	1/1	1/1	1/1	1/1	1/0	1/0	1/0	1/1	1/1	1/0	1/0	1/0	1/0	1/0	1/1	1/1	1/0	1/1	1/0	1/0	1/0	1/1	1/0	1/1	1/0	1/1	1/1	1/0	1/0	1/1	1/1	1/0	1/0	1/0	1/1	1/0	1/1	1/1	1/0	1/0
NC_037328.1:59798706-59798982(-)	BosSINEL	51.13	48.87	544	520	22	500	10	4	1/0	1/0	1/0	1/0	1/0	1/0	1/0	1/0	1/0	1/0	1/0	1/0	1/0	1/0	1/0	1/0	1/0	1/0	1/0	1/1	1/0	1/0	1/0	1/0	1/0	1/0	1/0	1/0	1/0	1/0	1/0	1/0	1/0	1/0	1/0	1/0	1/0	1/0	1/0	1/0
NC_037328.1:59984184-59984458(+)	BosSINEL	49.81	50.19	532	536	7	518	9	2	1/0	1/0	1/0	1/0	1/0	1/0	1/0	1/0	1/0	1/0	1/0	1/0	1/0	1/0	1/0	1/0	1/0	1/0	1/0	1/0	1/0	1/0	1/0	1/0	1/0	1/0	1/0	1/0	1/0	1/0	1/0	1/0	1/0	1/0	1/0	1/0	1/0	1/0	1/0	1/0
NC_037328.1:61659262-61659537(+)	BosSINEL	48.78	51.22	521	547	0	521	13	2	1/0	1/0	1/0	1/0	1/0	1/0	1/0	1/0	1/0	1/0	1/0	1/0	1/0	1/0	1/0	1/0	1/0	1/0	1/0	1/0	1/0	1/0	1/0	1/0	1/0	1/0	1/0	1/0	1/0	1/0	1/0	1/0	1/0	1/0	1/0	1/0	1/0	1/0	1/0	1/0
NC_037328.1:61689896-61690166(-)	BosSINEL	66.51	33.49	701	353	176	349	2	9	1/0	1/0	1/0	1/0	1/0	1/0	1/1	1/0	1/1	1/0	1/0	1/1	1/0	1/0	1/0	1/0	1/0	1/1	1/0	1/0	1/0	1/0	1/0	1/0	1/0	1/0	1/0	1/0	1/0	1/0	1/0	1/0	1/1	1/0	1/0	1/0	1/0	1/0	1/0	1/1
NC_037328.1:63028502-63028777(+)	BosSINEL	89.62	10.38	889	103	398	93	5	40	1/1	1/1	1/1	1/1	1/0	1/1	1/1	1/1	1/0	1/1	1/1	1/1	1/1	1/1	NA	1/1	1/1	1/1	1/1	1/0	1/1	1/1	1/0	1/1	1/1	1/1	1/1	1/1	1/1	1/0	1/0	1/1	1/1	1/0	1/1	1/1	1/1	1/0	1/0	1/0
NC_037328.1:63097281-63097557(+)	BosSINEL	50	50	534	534	4	526	4	2	1/0	1/0	1/0	1/0	1/0	1/0	1/0	1/0	1/0	1/0	1/0	1/0	1/0	1/0	1/0	1/0	1/0	1/0	1/0	1/0	1/0	1/0	1/0	1/0	1/0	1/0	1/0	1/0	1/0	1/0	1/0	1/0	1/0	1/0	1/0	1/0	1/0	1/0	1/0	1/0
NC_037328.1:63175261-63175537(+)	BosSINEL	61.3	38.7	651	411	124	403	4	5	1/0	1/1	1/1	1/0	1/0	1/0	1/0	1/0	1/0	1/0	1/0	1/0	1/0	1/0	1/0	1/1	1/0	1/0	1/0	1/0	1/0	1/0	1/0	1/1	1/0	1/0	1/0	1/1	1/0	1/0	1/0	1/1	1/0	1/0	1/0	1/0	1/0	1/0	1/0	1/0
NC_037328.1:63620045-63620317(-)	BosSINEL	49.63	50.37	530	538	1	528	5	2	1/0	1/0	1/0	1/0	1/0	1/0	1/0	1/0	1/0	1/0	1/0	1/0	1/0	1/0	1/0	1/0	1/0	1/0	1/0	1/0	1/0	1/0	1/0	1/0	1/0	1/0	1/0	1/0	1/0	1/0	1/0	1/0	1/0	1/0	1/0	1/0	1/0	1/0	1/0	1/0
NC_037328.1:64115762-64116023(-)	BosSINEL	87.62	12.38	927	131	399	129	1	7	1/1	1/1	1/1	1/1	1/1	NA	1/1	1/0	1/0	1/1	1/0	1/1	1/1	1/1	1/0	1/0	1/1	1/0	1/1	1/0	1/1	1/1	1/0	1/0	1/1	1/1	1/1	1/1	1/1	1/0	1/1	1/1	1/1	1/1	1/0	1/0	1/0	1/0	1/1	1/0
NC_037328.1:64617871-64618139(+)	BosSINEL	76.28	23.72	807	251	281	245	3	7	1/0	1/0	1/0	1/0	1/1	1/1	1/0	1/1	1/1	1/0	1/0	1/1	1/0	1/1	1/1	1/1	1/0	1/1	1/0	1/1	1/1	1/0	1/1	1/0	1/0	1/0	1/0	1/0	1/0	1/1	1/1	1/0	1/1	1/0	1/1	1/1	1/1	1/1	1/1	1/0
NC_037328.1:65112260-65112394(+)	BosSINEL	50.66	49.34	541	527	7	527	0	2	1/0	1/0	1/0	1/0	1/0	1/0	1/0	1/0	1/0	1/0	1/0	1/0	1/0	1/0	1/0	1/0	1/0	1/0	1/0	1/0	1/0	1/0	1/0	1/0	1/0	1/0	1/0	1/0	1/0	1/0	1/0	1/0	1/0	1/0	1/0	1/0	1/0	1/0	1/0	1/0
NC_037328.1:65696494-65696762(+)	BosSINEL	59.4	40.6	632	432	105	422	5	4	1/0	1/0	1/0	1/0	1/0	1/0	1/0	1/0	1/0	1/1	1/0	1/0	1/0	1/1	1/0	1/0	1/0	1/0	1/0	1/0	1/0	1/0	1/1	1/0	1/0	1/0	1/0	1/0	1/0	1/0	1/0	1/0	1/0	1/0	1/1	1/0	1/0	1/0	1/0	1/0
NC_037328.1:65748159-65748425(-)	BosSINEL	49.72	50.28	533	539	0	533	3	0	1/0	1/0	1/0	1/0	1/0	1/0	1/0	1/0	1/0	1/0	1/0	1/0	1/0	1/0	1/0	1/0	1/0	1/0	1/0	1/0	1/0	1/0	1/0	1/0	1/0	1/0	1/0	1/0	1/0	1/0	1/0	1/0	1/0	1/0	1/0	1/0	1/0	1/0	1/0	1/0
NC_037328.1:66143744-66144018(+)	BosSINEL	51.87	48.13	554	514	31	492	11	2	1/0	1/0	1/0	1/0	1/0	1/0	1/0	1/0	1/0	1/0	1/0	1/0	1/0	1/0	0/0	1/1	1/0	1/0	1/0	1/0	1/0	1/0	1/0	1/0	1/0	1/0	1/0	1/0	1/0	1/0	1/0	1/1	1/0	1/0	1/0	1/0	1/0	1/0	1/0	1/0
NC_037328.1:66337898-66338166(+)	BosSINEL	80.83	19.17	860	204	330	200	2	4	1/1	1/1	1/1	1/1	1/0	1/1	1/1	1/1	1/0	1/1	1/1	1/0	1/1	1/0	1/0	1/0	1/0	1/0	1/0	1/0	1/1	1/1	1/0	1/0	1/0	1/1	1/0	1/0	1/0	1/0	1/1	1/0	1/0	1/1	1/0	1/0	1/0	1/1	1/0	1/0
NC_037328.1:66470998-66471269(+)	BosSINEL	49.16	50.84	527	545	0	527	9	0	1/0	1/0	1/0	1/0	1/0	1/0	1/0	1/0	1/0	1/0	1/0	1/0	1/0	1/0	1/0	1/0	1/0	1/0	1/0	1/0	1/0	1/0	1/0	1/0	1/0	1/0	1/0	1/0	1/0	1/0	1/0	1/0	1/0	1/0	1/0	1/0	1/0	1/0	1/0	1/0
NC_037328.1:66947908-66948183(-)	BosSINEL	48.51	51.49	520	552	0	520	16	0	1/0	1/0	1/0	1/0	1/0	1/0	1/0	1/0	1/0	1/0	1/0	1/0	1/0	1/0	1/0	1/0	1/0	1/0	1/0	1/0	1/0	1/0	1/0	1/0	1/0	1/0	1/0	1/0	1/0	1/0	1/0	1/0	1/0	1/0	1/0	1/0	1/0	1/0	1/0	1/0
NC_037328.1:68299060-68299331(+)	BosSINEL	53.76	46.24	572	492	42	488	2	4	1/0	1/0	1/1	1/0	1/0	1/0	1/0	1/0	1/0	1/0	1/0	1/1	1/0	1/0	1/0	1/0	1/0	1/0	1/0	1/0	1/0	1/0	1/0	1/0	1/1	1/0	1/0	1/0	1/0	1/0	1/0	1/0	1/0	1/0	1/0	1/0	1/0	1/0	1/0	1/0
NC_037328.1:69176170-69176414(+)	BosSINEL	49.44	50.56	530	542	0	530	6	0	1/0	1/0	1/0	1/0	1/0	1/0	1/0	1/0	1/0	1/0	1/0	1/0	1/0	1/0	1/0	1/0	1/0	1/0	1/0	1/0	1/0	1/0	1/0	1/0	1/0	1/0	1/0	1/0	1/0	1/0	1/0	1/0	1/0	1/0	1/0	1/0	1/0	1/0	1/0	1/0
NC_037328.1:70011408-70011676(+)	BosSINEL	48.88	51.12	524	548	0	524	12	0	1/0	1/0	1/0	1/0	1/0	1/0	1/0	1/0	1/0	1/0	1/0	1/0	1/0	1/0	1/0	1/0	1/0	1/0	1/0	1/0	1/0	1/0	1/0	1/0	1/0	1/0	1/0	1/0	1/0	1/0	1/0	1/0	1/0	1/0	1/0	1/0	1/0	1/0	1/0	1/0
NC_037328.1:70183041-70183316(-)	BosSINEL	56.95	43.05	606	458	80	446	6	4	1/0	1/0	1/0	1/0	1/0	1/0	1/0	1/0	1/0	1/1	1/0	1/0	1/0	1/0	1/1	1/1	1/1	1/0	1/1	1/0	1/0	1/1	1/1	1/0	1/0	1/1	1/0	1/0	1/0	1/0	1/1	1/0	1/0	1/0	1/0	1/1	1/1	1/1	1/0	1/1
NC_037328.1:70197368-70197642(+)	BosSINEL	49.72	50.28	531	537	0	531	3	2	1/0	1/0	1/0	1/0	1/0	1/0	1/0	1/0	1/0	1/0	1/0	1/0	1/0	1/0	1/0	1/0	1/0	1/0	1/0	1/0	1/0	1/0	1/0	1/0	1/0	1/0	1/0	1/0	1/0	1/0	1/0	1/0	1/0	1/0	1/0	1/0	1/0	1/0	1/0	1/0
NC_037328.1:70725339-70725609(-)	BosSINEL	86.99	13.01	929	139	397	135	2	2	1/1	1/1	1/1	1/1	1/0	1/1	1/1	1/0	1/0	1/0	1/1	1/1	1/0	1/1	1/0	1/0	1/1	1/0	1/1	1/0	1/0	1/0	1/1	1/0	1/1	1/1	1/0	1/1	1/1	1/0	1/1	1/1	1/1	1/0	1/0	1/0	1/1	1/1	1/0	1/1
NC_037328.1:71295278-71295553(+)	BosSINEL	75.05	24.95	791	263	267	257	3	9	1/0	1/1	1/0	1/0	1/1	1/1	1/1	1/1	1/1	1/1	1/1	1/1	1/1	1/1	1/0	1/1	1/0	1/0	1/0	1/1	1/1	1/1	1/1	1/1	1/1	1/0	1/1	1/1	1/1	1/1	1/1	1/1	1/0	1/1	1/0	1/0	1/0	1/0	1/0	1/0
NC_037328.1:72685293-72685565(-)	BosSINEL	87.29	12.71	920	134	393	134	0	9	1/1	1/1	1/1	1/1	1/1	1/1	1/1	1/1	1/1	1/1	1/1	1/1	1/0	1/1	1/1	1/1	NA	1/1	1/1	1/1	1/1	1/0	1/1	1/1	1/1	1/1	1/1	1/1	1/0	1/1	1/1	1/1	1/1	1/1	1/1	1/1	1/1	1/1	1/1	1/1
NC_037328.1:72837388-72837604(+)	BosSINEL	52.15	47.85	557	511	29	499	6	2	1/0	1/0	1/0	1/0	1/0	1/0	1/0	1/0	1/0	1/0	1/0	1/0	1/0	1/0	1/0	1/0	1/0	1/0	1/0	1/0	1/0	1/0	1/0	1/0	1/0	1/0	1/0	1/0	1/0	1/0	1/0	1/0	1/0	1/0	1/0	1/0	1/0	1/0	1/0	1/0
NC_037328.1:72931686-72931961(-)	BosSINEL	87.52	12.48	926	132	397	132	0	7	1/1	1/1	1/1	1/1	1/1	1/0	1/1	1/1	1/1	1/1	1/0	1/1	1/1	1/1	1/1	1/1	1/1	1/1	1/0	1/1	1/1	1/1	1/1	1/1	1/0	1/0	1/0	1/0	1/1	1/1	1/1	1/1	1/0	1/1	1/1	1/1	1/1	1/1	1/1	1/1
NC_037328.1:75519808-75519896(+)	BosSINEL	40.44	59.56	423	623	90	243	190	13	1/0	0/0	1/0	1/1	1/1	1/0	1/0	1/0	1/0	1/0	0/0	1/1	1/1	0/0	1/0	1/0	0/0	1/0	1/0	1/0	1/0	1/0	0/0	0/0	1/0	1/0	1/0	0/0	1/0	0/0	1/1	0/0	1/0	0/0	1/1	0/0	1/1	1/0	1/0	1/0
NC_037328.1:75708883-75709157(+)	BosSINEL	86.13	13.87	913	147	386	141	3	6	1/1	1/1	1/1	1/0	1/1	1/1	1/1	1/1	1/0	1/1	1/1	1/1	1/1	1/1	1/1	1/0	1/1	1/1	1/0	1/1	1/0	1/1	1/0	1/0	1/1	1/0	1/0	1/1	1/1	1/0	1/1	1/1	1/1	1/1	1/1	1/0	1/1	1/0	1/1	1/0
NC_037328.1:75939980-75940251(-)	BosSINEL	54.32	45.68	578	486	48	482	2	4	1/1	1/0	1/0	1/0	1/1	1/0	1/0	1/0	1/0	1/0	1/0	1/0	1/0	1/0	1/0	1/0	1/0	1/0	1/0	1/0	1/0	1/0	1/0	1/1	1/0	1/0	1/0	1/0	1/0	1/0	1/0	1/0	1/0	1/0	1/0	1/0	1/0	1/0	1/0	1/0
NC_037328.1:76227651-76227926(+)	BosSINEL	48.88	51.12	522	546	4	514	16	2	1/0	1/0	1/0	1/0	1/0	1/0	1/0	1/0	1/0	1/0	1/0	1/0	0/0	1/0	1/0	1/0	1/0	1/0	1/0	1/0	1/0	1/0	1/0	1/0	1/0	1/0	1/0	1/0	1/0	1/0	1/0	1/0	1/0	1/0	1/0	1/0	1/0	1/0	1/0	1/0
NC_037328.1:76230319-76230437(+)	BosSINEL	51.31	48.69	547	519	18	511	4	3	1/0	1/0	1/0	1/0	1/0	1/0	1/0	1/0	1/0	1/0	1/0	1/0	1/0	1/0	1/0	1/0	1/0	1/0	1/0	1/0	1/0	1/0	1/0	1/0	1/0	1/0	1/0	1/0	1/0	1/0	1/0	1/0	1/0	1/0	1/0	1/0	1/0	1/0	1/0	1/0
NC_037328.1:76833827-76834228(+)	BosSINEL	86.7	13.3	919	141	391	137	2	6	1/1	1/1	1/1	1/1	1/1	1/1	1/0	1/0	1/1	1/0	1/1	1/1	1/1	1/0	1/0	1/1	1/1	1/1	1/0	1/0	1/0	1/1	1/1	1/0	1/0	1/1	1/1	1/0	1/1	1/0	1/0	1/1	1/0	1/1	1/0	1/1	1/0	1/1	1/1	1/1
NC_037328.1:77896624-77896882(-)	BosSINEL	57.36	42.64	608	452	80	448	2	6	1/0	1/0	1/0	1/0	1/0	1/1	1/0	1/0	1/0	1/0	1/1	1/0	1/0	1/0	1/0	1/0	1/0	1/0	1/1	1/0	1/0	1/0	1/0	1/0	1/0	1/0	1/0	1/0	1/0	1/0	1/0	1/0	1/0	1/0	1/0	1/0	1/0	1/0	1/0	1/0
NC_037328.1:78841256-78841531(-)	BosSINEL	49.44	50.56	530	542	0	530	6	0	1/0	1/0	1/0	1/0	1/0	1/0	1/0	1/0	1/0	1/0	1/0	1/0	1/0	1/0	1/0	1/0	1/0	1/0	1/0	1/0	1/0	1/0	1/0	1/0	1/0	1/0	1/0	1/0	1/0	1/0	1/0	1/0	1/0	1/0	1/0	1/0	1/0	1/0	1/0	1/0
NC_037328.1:79578826-79579080(+)	BosSINEL	51.32	48.68	546	518	24	498	10	4	1/0	1/0	1/0	1/0	1/0	1/0	1/0	1/0	1/0	1/0	1/0	1/0	1/0	1/0	1/0	1/0	1/0	1/0	1/0	1/0	1/0	1/0	1/0	1/0	1/0	1/0	1/0	1/0	1/0	1/0	1/0	1/0	1/0	1/0	1/0	1/0	1/0	1/0	1/0	1/0
NC_037328.1:79697865-79698121(+)	BosSINEL	60.3	39.7	644	424	113	418	3	2	1/0	1/0	1/0	1/0	1/0	1/0	1/0	1/0	1/0	1/1	1/0	0/0	1/1	1/0	1/0	1/0	1/1	1/1	1/0	1/0	1/0	1/0	1/0	1/0	1/0	1/0	1/0	1/1	1/0	1/0	1/0	1/0	1/0	1/0	1/0	1/0	1/1	1/0	1/0	1/0
NC_037328.1:80096426-80096697(-)	BosSINEL	49.63	50.37	530	538	2	526	6	2	1/0	1/0	1/0	1/0	1/0	1/0	1/0	1/0	1/0	1/0	1/0	1/0	1/0	1/0	1/0	1/0	1/0	1/0	1/0	1/0	1/0	1/0	1/0	1/0	1/0	1/0	1/0	1/0	1/0	1/0	1/0	1/0	1/0	1/0	1/0	1/0	1/0	1/0	1/0	1/0
NC_037328.1:80098720-80098992(+)	BosSINEL	49.63	50.37	532	540	2	528	6	0	1/0	1/0	1/0	1/0	1/0	1/0	1/0	1/0	1/0	1/0	1/0	1/0	1/0	1/0	1/0	1/0	1/0	1/0	1/0	1/0	1/0	1/0	1/0	1/0	1/0	1/0	1/0	1/0	1/0	1/0	1/0	1/0	1/0	1/0	1/0	1/0	1/0	1/0	1/0	1/0
NC_037328.1:80317448-80317717(+)	BosSINEL	50	50	534	534	0	534	0	2	1/0	1/0	1/0	1/0	1/0	1/0	1/0	1/0	1/0	1/0	1/0	1/0	1/0	1/0	1/0	1/0	1/0	1/0	1/0	1/0	1/0	1/0	1/0	1/0	1/0	1/0	1/0	1/0	1/0	1/0	1/0	1/0	1/0	1/0	1/0	1/0	1/0	1/0	1/0	1/0
NC_037328.1:80317963-80318254(-)	BosSINEL	57.9	42.1	601	437	90	421	8	17	1/0	1/0	1/0	1/0	1/0	1/0	1/0	1/0	1/0	1/0	1/0	1/0	1/0	1/1	1/0	1/1	1/1	1/0	1/0	1/0	1/0	1/0	1/0	1/1	1/0	1/1	1/0	1/1	1/0	1/0	1/0	1/0	1/0	1/0	1/0	1/0	1/0	1/0	1/0	1/0
NC_037328.1:80377710-80377977(+)	BosSINEL	54.87	45.13	586	482	57	472	5	2	1/0	1/0	1/0	1/0	1/0	1/0	1/0	1/0	1/0	1/0	1/0	1/0	1/0	1/0	1/0	1/0	1/0	1/0	1/0	1/0	1/0	1/0	1/0	1/0	1/0	1/0	1/0	1/0	1/0	1/0	1/0	1/0	1/0	1/0	1/0	1/0	1/0	1/0	1/0	1/0
NC_037328.1:80430965-80431235(+)	BosSINEL	68.93	31.07	732	330	202	328	1	5	1/1	1/1	1/0	1/0	1/1	1/0	1/0	1/0	1/1	1/1	1/1	1/0	1/1	1/1	1/0	1/1	1/1	1/1	1/1	1/0	1/0	1/0	1/1	1/1	1/1	1/1	1/1	1/0	1/1	1/0	1/0	1/1	1/1	1/0	1/1	1/0	1/0	1/1	1/0	1/0
NC_037328.1:81216300-81216563(+)	BosSINEL	49.81	50.19	534	538	5	524	7	0	1/0	1/0	1/0	1/0	1/0	1/0	1/0	1/0	1/0	1/0	1/0	1/0	1/0	1/0	1/0	1/0	1/0	1/0	1/0	1/0	1/0	1/0	1/0	1/0	1/0	1/0	1/0	1/0	1/0	1/0	1/0	1/0	1/0	1/0	1/0	1/0	1/0	1/0	1/0	1/0
NC_037328.1:81909220-81909343(-)	BosSINEL	81.58	18.42	868	196	337	194	1	4	1/1	1/1	1/1	1/1	1/1	1/0	1/0	1/1	1/1	1/0	1/1	1/0	1/1	1/1	1/1	1/0	1/1	1/1	1/1	1/0	1/0	1/0	1/0	1/1	1/1	1/1	1/1	1/1	1/1	1/1	1/1	1/1	1/0	1/1	1/1	1/1	1/1	1/1	1/0	1/1
NC_037328.1:82662354-82662629(-)	BosSINEL	50.19	49.81	536	532	4	528	2	2	1/0	1/0	1/0	1/0	1/0	1/0	1/0	1/0	1/0	1/0	1/0	1/0	1/0	1/0	1/0	1/0	1/0	1/0	1/0	1/0	1/0	1/0	1/0	1/0	1/0	1/0	1/0	1/0	1/0	1/0	1/0	1/0	1/0	1/0	1/0	1/0	1/0	1/0	1/0	1/0
NC_037328.1:83075959-83076234(+)	BosSINEL	82.67	17.33	873	183	347	179	2	8	1/1	1/1	1/0	1/0	1/0	1/0	1/0	1/1	1/1	1/1	1/0	1/1	1/1	1/1	1/1	1/1	1/1	1/0	1/1	1/1	1/0	1/0	1/1	1/1	1/1	1/1	1/0	1/0	1/1	1/1	1/1	1/0	1/1	1/1	1/1	1/1	1/1	1/1	1/1	1/1
NC_037328.1:83211084-83211357(-)	BosSINEL	50.09	49.91	534	532	4	526	3	3	1/0	1/0	1/0	1/0	1/0	1/0	1/0	1/0	1/0	1/0	1/0	1/0	1/0	1/0	1/0	1/0	1/0	1/0	1/0	1/0	1/0	1/0	1/0	1/0	1/0	1/0	1/0	1/0	1/0	1/0	1/0	1/0	1/0	1/0	1/0	1/0	1/0	1/0	1/0	1/0
NC_037328.1:83665170-83665445(-)	BosSINEL	49.44	50.56	528	540	0	528	6	2	1/0	1/0	1/0	1/0	1/0	1/0	1/0	1/0	1/0	1/0	1/0	1/0	1/0	1/0	1/0	1/0	1/0	1/0	1/0	1/0	1/0	1/0	1/0	1/0	1/0	1/0	1/0	1/0	1/0	1/0	1/0	1/0	1/0	1/0	1/0	1/0	1/0	1/0	1/0	1/0
NC_037328.1:83665641-83665777(-)	BosSINEL	49.63	50.37	530	538	1	528	5	2	1/0	1/0	1/0	1/0	1/0	1/0	1/0	1/0	1/0	1/0	1/0	1/0	1/0	1/0	1/0	1/0	1/0	1/0	1/0	1/0	1/0	1/0	1/0	1/0	1/0	1/0	1/0	1/0	1/0	1/0	1/0	1/0	1/0	1/0	1/0	1/0	1/0	1/0	1/0	1/0
NC_037328.1:84707609-84707727(+)	BosSINEL	50	50	534	534	4	526	4	2	1/0	1/0	1/0	1/0	1/0	1/0	1/0	1/0	1/0	1/0	1/0	1/0	1/0	1/0	1/0	1/0	1/0	1/0	1/0	1/0	1/0	1/0	1/0	1/0	1/0	1/0	1/0	1/0	1/0	1/0	1/0	1/0	1/0	1/0	1/0	1/0	1/0	1/0	1/0	1/0
NC_037328.1:84996061-84996193(+)	BosSINEL	89.35	10.65	931	111	410	111	0	15	1/1	1/1	1/1	1/1	1/1	1/1	1/0	1/1	1/1	1/1	NA	1/1	1/0	1/1	1/1	1/1	1/1	1/1	1/1	1/1	1/0	1/1	1/0	1/0	1/1	1/0	1/0	1/1	1/1	1/0	1/1	1/1	1/0	1/1	1/1	1/1	1/1	1/0	1/1	1/1
NC_037328.1:85565912-85566184(-)	BosSINEL	49.16	50.84	525	543	1	523	10	2	1/0	1/0	1/0	1/0	1/0	1/0	1/0	1/0	1/0	1/0	1/0	1/0	1/0	1/0	1/0	1/0	1/0	1/0	1/0	1/0	1/0	1/0	1/0	1/0	1/0	1/0	1/0	1/0	1/0	1/0	1/0	1/0	1/0	1/0	1/0	1/0	1/0	1/0	1/0	1/0
NC_037328.1:85685244-85685516(+)	BosSINEL	89.53	10.47	949	111	419	111	0	6	1/1	1/1	1/1	1/1	1/1	1/0	1/1	1/0	1/1	1/0	1/1	1/0	1/1	1/0	1/1	NA	1/1	1/1	1/1	1/1	1/1	1/0	1/1	1/1	1/0	1/1	1/1	1/1	1/1	1/1	1/0	1/1	1/1	1/0	1/1	1/0	1/1	1/0	1/1	1/1
NC_037328.1:85808634-85808767(-)	BosSINEL	66.13	33.87	701	359	175	351	4	6	1/1	1/0	1/0	1/1	1/0	1/0	1/0	1/0	1/0	1/0	1/0	1/0	1/0	1/0	1/1	1/0	1/0	1/0	1/0	1/1	1/1	1/0	1/0	1/0	1/0	1/0	1/0	1/1	1/0	1/0	1/0	1/0	1/0	1/0	1/0	1/0	1/0	1/0	1/0	1/0
NC_037328.1:86012919-86013043(-)	BosSINEL	87.9	12.1	930	128	402	126	1	7	1/1	1/1	1/1	1/1	1/1	1/1	1/1	1/0	1/1	1/1	1/1	1/0	1/1	1/1	1/1	1/1	1/1	1/1	1/1	1/0	1/0	1/0	1/1	1/0	1/1	1/1	1/1	1/1	1/1	1/0	1/1	1/0	1/0	1/1	1/1	1/0	1/1	1/0	1/0	1/1
NC_037328.1:86517448-86517555(-)	BosSINEL	54.8	45.2	582	480	58	466	7	5	1/0	1/0	1/0	1/0	1/0	1/0	1/0	1/0	1/0	1/1	1/0	1/0	1/0	1/0	1/0	1/0	1/0	1/0	1/0	1/0	1/0	1/0	1/0	1/0	1/1	1/0	1/1	1/0	1/1	1/0	1/0	1/0	1/0	1/1	1/0	1/1	1/0	1/1	1/0	1/0
NC_037328.1:86797857-86798141(-)	BosSINEL	48.97	51.03	525	547	29	467	40	0	1/0	1/1	1/0	1/0	0/0	1/0	1/0	1/0	1/0	1/0	1/0	1/0	1/0	1/0	1/0	1/0	1/0	0/0	1/0	1/0	1/0	1/0	1/0	1/0	1/0	1/0	1/0	1/0	1/0	1/0	1/0	1/0	1/0	1/0	1/0	1/0	1/0	1/0	1/0	1/0
NC_037328.1:86803078-86803171(-)	BosSINEL	49.53	50.47	529	539	0	529	5	2	1/0	1/0	1/0	1/0	1/0	1/0	1/0	1/0	1/0	1/0	1/0	1/0	1/0	1/0	1/0	1/0	1/0	1/0	1/0	1/0	1/0	1/0	1/0	1/0	1/0	1/0	1/0	1/0	1/0	1/0	1/0	1/0	1/0	1/0	1/0	1/0	1/0	1/0	1/0	1/0
NC_037328.1:87303830-87304097(+)	BosSINEL	53.58	46.42	569	493	49	471	11	5	1/0	1/0	1/0	1/0	1/0	1/0	1/0	1/0	1/0	1/0	1/1	1/0	1/0	1/0	1/0	1/0	1/0	1/0	1/0	1/0	1/0	1/0	1/0	1/0	1/0	1/0	1/0	1/0	1/0	1/0	1/0	1/0	1/0	1/0	1/0	1/0	1/0	1/0	1/0	1/0
NC_037328.1:87819558-87819832(+)	BosSINEL	75.75	24.25	803	257	276	251	3	6	1/0	1/1	1/1	1/0	1/1	1/0	1/0	1/1	1/0	1/0	1/0	1/0	0/0	1/0	1/0	1/0	1/0	1/0	1/0	1/0	1/0	1/0	1/0	1/0	1/0	1/0	1/0	1/0	1/0	1/0	1/1	1/0	1/0	1/0	1/0	1/1	1/0	1/0	1/0	1/0
NC_037328.1:88969186-88969452(+)	BosSINEL	49.81	50.19	534	538	0	534	2	0	1/0	1/0	1/0	1/0	1/0	1/0	1/0	1/0	1/0	1/0	1/0	1/0	1/0	1/0	1/0	1/0	1/0	1/0	1/0	1/0	1/0	1/0	1/0	1/0	1/0	1/0	1/0	1/0	1/0	1/0	1/0	1/0	1/0	1/0	1/0	1/0	1/0	1/0	1/0	1/0
NC_037328.1:89397241-89397516(+)	BosSINEL	51.22	48.78	547	521	17	513	4	2	1/0	1/0	1/0	1/0	1/0	1/0	1/0	1/0	1/0	1/0	1/0	1/0	1/0	1/0	1/0	1/0	1/0	1/0	1/0	1/0	1/1	1/0	1/0	1/0	1/0	1/0	1/0	1/0	1/0	1/0	1/0	1/0	1/0	1/0	1/0	1/0	1/0	1/0	1/0	1/0
NC_037328.1:89407746-89407877(+)	BosSINEL	47.94	52.06	512	556	0	512	22	2	1/0	1/0	1/0	1/0	1/0	1/0	1/0	1/0	1/0	1/0	1/0	1/0	1/0	1/0	1/0	1/0	1/0	1/0	1/0	1/0	1/0	1/0	1/0	1/0	1/0	1/0	1/0	1/0	1/0	1/0	1/0	1/0	1/0	1/0	1/0	1/0	1/0	1/0	1/0	1/0
NC_037328.1:90782993-90783269(-)	BosSINEL	49.63	50.37	532	540	2	528	6	0	1/0	1/0	1/0	1/0	1/0	1/0	1/0	1/0	1/0	1/0	1/0	1/0	1/0	1/0	1/0	1/0	1/0	1/0	1/0	1/0	1/0	1/0	1/0	1/0	1/0	1/0	1/0	1/0	1/0	1/0	1/0	1/0	1/0	1/0	1/0	1/0	1/0	1/0	1/0	1/0
NC_037328.1:91496862-91497125(-)	BosSINEL	49.63	50.37	532	540	3	526	7	0	1/0	1/0	1/0	1/0	1/0	1/0	1/0	1/0	1/0	1/0	1/0	1/0	1/0	1/0	1/0	1/0	1/0	1/0	1/0	1/0	1/0	1/0	1/0	1/0	1/0	1/0	1/0	1/0	1/0	1/0	1/0	1/0	1/0	1/0	1/0	1/0	1/0	1/0	1/0	1/0
NC_037328.1:92960020-92960270(-)	BosSINEL	49.91	50.09	532	534	5	522	6	3	1/0	1/0	1/0	1/0	1/0	1/0	1/0	1/0	1/0	1/0	1/0	1/0	1/0	1/0	1/0	1/0	1/0	1/0	1/0	1/0	1/0	1/0	1/0	1/0	1/0	1/0	1/0	1/0	1/0	1/0	1/0	1/0	1/0	1/0	1/0	1/0	1/0	1/0	1/0	1/0
NC_037328.1:93369933-93370210(-)	BosSINEL	50.19	49.81	536	532	2	532	0	2	1/0	1/0	1/0	1/0	1/0	1/0	1/0	1/0	1/0	1/0	1/0	1/0	1/0	1/0	1/0	1/0	1/0	1/0	1/0	1/0	1/0	1/0	1/0	1/0	1/0	1/0	1/0	1/0	1/0	1/0	1/0	1/0	1/0	1/0	1/0	1/0	1/0	1/0	1/0	1/0
NC_037328.1:94639021-94639289(-)	BosSINEL	60.11	39.89	642	426	111	420	3	2	1/0	1/0	1/0	1/0	1/1	1/1	1/0	1/1	1/0	1/0	1/1	1/1	1/0	1/0	1/1	1/0	1/0	1/0	1/0	1/0	1/0	1/0	1/0	1/0	1/0	1/0	1/0	1/0	1/1	1/1	1/0	1/0	1/0	1/0	1/0	1/1	1/0	1/0	1/0	1/1
NC_037328.1:96767761-96767942(+)	BosSINEL	50	50	534	534	5	524	5	2	1/0	1/0	1/0	1/0	1/0	1/0	1/0	1/0	1/0	1/0	1/0	1/0	1/0	1/0	1/0	1/0	1/0	1/0	1/0	1/0	1/0	1/0	1/0	1/0	1/0	1/0	1/0	1/0	1/0	1/0	1/0	1/0	1/0	1/0	1/0	1/0	1/0	1/0	1/0	1/0
NC_037328.1:98910399-98910674(-)	BosSINEL	67.01	32.99	709	349	181	347	1	7	1/0	1/0	1/0	1/0	1/0	1/0	1/1	1/1	1/1	1/1	1/1	1/0	1/1	1/0	1/1	1/0	1/0	1/0	1/1	1/1	1/0	1/0	1/0	1/0	1/1	1/0	1/1	1/0	1/0	1/0	1/0	1/0	1/1	1/1	1/0	1/0	1/1	1/0	1/1	1/1
NC_037328.1:100234963-100235102(-)	BosSINEL	51.03	48.97	543	521	13	517	2	4	1/0	1/0	1/0	1/0	1/0	1/0	1/0	1/0	1/0	1/0	1/0	1/0	1/0	1/0	1/0	1/0	1/0	1/0	1/0	1/0	1/0	1/0	1/0	1/0	1/0	1/0	1/0	1/0	1/0	1/0	1/0	1/0	1/0	1/0	1/0	1/0	1/0	1/0	1/0	1/0
NC_037328.1:101118969-101119242(+)	BosSINEL	70.47	29.53	747	313	221	305	4	6	1/1	1/1	1/1	1/0	1/0	1/0	1/0	1/0	1/0	1/0	1/0	1/0	1/0	1/0	1/0	1/0	1/0	1/0	1/0	1/0	1/0	1/0	1/0	1/0	1/0	1/0	1/0	1/0	1/0	1/0	1/0	1/0	1/1	1/0	1/0	1/0	1/0	1/0	1/0	1/0
NC_037328.1:101367175-101367451(+)	BosSINEL	50.09	49.91	532	530	14	504	13	5	1/0	1/0	1/0	1/0	1/0	1/0	1/0	1/0	1/0	1/0	1/0	1/0	1/0	1/0	1/0	1/0	1/0	1/0	1/0	1/0	1/0	1/0	1/0	1/0	1/0	1/0	1/0	1/0	1/0	1/0	1/0	1/0	1/0	1/0	1/0	1/0	1/0	1/0	1/0	1/0
NC_037328.1:101384678-101384930(+)	BosSINEL	49.34	50.66	527	541	3	521	10	2	1/0	1/0	1/0	1/0	1/0	1/0	1/0	1/0	1/0	1/0	1/0	1/0	1/0	1/0	1/0	1/0	1/0	1/0	1/0	1/0	1/0	1/0	1/0	1/0	1/0	1/0	1/0	1/0	1/0	1/0	1/0	1/0	1/0	1/0	1/0	1/0	1/0	1/0	1/0	1/0
NC_037328.1:102293713-102293989(+)	BosSINEL	75.98	24.02	810	256	277	256	0	3	1/0	1/1	1/0	1/0	1/0	1/0	1/1	1/1	1/1	1/1	1/1	1/1	1/1	1/1	1/1	1/1	1/1	1/1	1/1	1/1	1/1	1/1	1/1	1/1	1/1	1/1	1/1	1/0	1/1	1/1	1/1	1/0	1/1	1/1	1/1	1/0	1/0	1/1	1/1	1/1
NC_037328.1:102466537-102466669(-)	BosSINEL	49.91	50.09	534	536	6	522	7	1	1/0	1/0	1/0	1/0	1/0	1/0	1/0	1/0	1/0	1/0	1/0	1/0	1/0	1/0	1/0	1/0	1/0	1/0	1/0	1/0	1/0	1/0	1/0	1/0	1/0	1/0	1/0	1/0	1/0	1/0	1/0	1/0	1/0	1/0	1/0	1/0	1/0	1/0	1/0	1/0
NC_037328.1:102841046-102841301(+)	BosSINEL	78.22	21.78	826	230	303	220	5	8	1/1	1/1	1/1	1/1	1/1	1/1	1/0	1/1	1/0	1/0	1/1	1/1	1/0	1/0	1/0	1/0	1/0	1/0	1/0	1/0	1/0	1/0	1/1	1/1	1/0	1/1	1/0	1/0	1/0	1/0	1/0	1/0	1/1	1/0	1/0	1/0	1/1	1/0	1/0	1/0
NC_037328.1:103090433-103090709(-)	BosSINEL	56.66	43.34	604	462	72	460	1	3	1/0	1/0	1/0	1/0	1/0	1/1	1/0	1/1	1/0	1/0	1/0	1/1	1/0	1/1	1/0	1/0	1/0	1/0	1/0	1/0	1/0	1/0	1/0	1/0	1/1	1/0	1/0	1/0	1/0	1/0	1/0	1/0	1/0	1/0	1/0	1/0	1/0	1/0	1/0	1/0
NC_037328.1:103392565-103392688(+)	BosSINEL	52.26	47.74	556	508	27	502	3	4	1/0	1/0	1/0	1/0	1/0	1/0	1/0	1/0	1/0	1/0	1/0	1/0	1/0	1/0	1/0	1/0	1/0	1/0	1/0	1/0	1/0	1/0	1/0	1/0	1/0	1/0	1/0	1/0	1/0	1/0	1/0	1/0	1/0	1/0	1/0	1/0	1/0	1/0	1/0	1/0
NC_037328.1:103446147-103446416(+)	BosSINEL	49.91	50.09	533	535	6	521	7	2	1/0	1/0	1/0	1/0	1/0	1/0	1/0	1/0	1/0	1/0	1/0	1/0	1/0	1/0	1/0	1/0	1/0	1/0	1/0	1/0	1/0	1/0	1/0	1/0	1/0	1/0	1/0	1/0	1/0	1/0	1/0	1/0	1/0	1/0	1/0	1/0	1/0	1/0	1/0	1/0
NC_037328.1:103446956-103447207(-)	BosSINEL	54	46	567	483	46	475	4	11	1/0	1/0	1/0	1/0	1/0	1/0	1/0	1/1	1/0	1/0	1/0	1/0	1/0	1/0	1/0	1/0	1/0	1/1	1/0	1/0	1/0	1/0	1/0	1/0	1/0	1/0	1/0	1/0	1/1	1/0	1/0	1/0	1/0	1/0	1/0	1/0	1/0	1/0	1/0	1/0
NC_037328.1:103823620-103823897(+)	BosSINEL	49.44	50.56	528	540	3	522	9	2	1/0	1/0	1/0	1/0	1/0	1/0	1/0	1/0	1/0	1/0	1/0	1/0	1/0	1/0	1/0	1/0	1/0	1/0	1/0	1/0	1/0	1/0	1/0	1/0	1/0	1/0	1/0	1/0	1/0	1/0	1/0	1/0	1/0	1/0	1/0	1/0	1/0	1/0	1/0	1/0
NC_037328.1:104075597-104075854(+)	BosSINEL	67.08	32.92	711	349	184	343	3	6	1/1	1/0	1/1	1/0	1/0	1/0	1/1	1/0	1/0	1/0	1/0	1/0	1/0	1/0	1/0	1/0	1/0	1/0	1/0	1/0	1/0	1/0	1/0	1/0	1/0	1/0	1/0	NA	1/0	1/0	1/1	1/0	1/1	1/0	1/1	1/1	1/0	1/0	1/0	1/0
NC_037328.1:104748368-104748644(-)	BosSINEL	71.88	28.12	759	297	234	291	3	8	1/0	1/0	1/0	1/1	1/0	1/1	1/0	1/1	1/0	1/1	1/1	1/1	1/0	1/0	1/0	1/1	1/0	1/0	1/1	1/1	1/1	1/0	1/0	1/1	1/0	1/0	1/1	1/1	1/0	1/0	1/1	1/1	1/1	1/0	1/0	1/0	1/0	1/0	1/1	1/0
NC_037328.1:104919882-104919985(-)	BosSINEL	85.74	14.26	878	146	367	144	1	24	1/1	1/0	1/0	1/0	NA	1/1	1/1	1/1	1/1	1/1	1/1	1/1	1/0	1/1	1/1	1/1	1/1	1/1	1/1	1/1	1/1	1/1	1/1	1/1	1/1	1/1	1/1	1/1	1/1	1/1	1/1	1/1	1/1	1/0	1/1	1/1	1/1	1/1	1/1	1/1
NC_037328.1:104944799-104945074(-)	BosSINEL	83.58	16.42	891	175	358	175	0	3	1/1	1/0	1/0	1/1	1/1	1/0	1/1	1/1	1/0	1/1	1/0	1/1	1/1	1/1	1/0	1/1	1/1	1/0	1/1	1/0	1/0	1/0	1/1	1/1	1/1	1/1	1/1	1/1	1/0	1/1	1/1	1/1	1/0	1/1	1/0	1/0	1/0	1/0	1/1	1/0
NC_037328.1:105042515-105042647(+)	BosSINEL	66.86	33.14	702	348	180	342	3	11	1/0	1/0	1/0	1/0	1/1	1/0	1/0	1/0	1/1	1/1	1/0	1/0	1/0	1/0	1/1	1/0	1/0	1/0	1/0	1/0	1/1	1/1	1/0	1/0	1/0	1/0	1/0	1/0	1/0	1/1	1/0	1/1	1/1	1/0	1/0	1/0	1/0	1/1	1/0	1/0
NC_037328.1:105745750-105745882(-)	BosSINEL	76.69	23.31	816	248	285	246	1	4	1/1	1/1	1/1	1/1	1/0	1/0	1/0	1/0	1/1	1/0	1/0	1/0	1/0	1/1	1/1	1/0	1/0	1/0	1/0	1/0	1/1	1/0	1/1	1/0	1/0	1/0	1/0	1/0	1/0	1/0	1/0	1/0	1/0	1/0	1/0	1/0	1/0	1/1	1/0	1/0
NC_037328.1:108460827-108461102(+)	BosSINEL	72.75	27.25	777	291	250	277	7	2	1/1	1/1	1/1	1/1	1/0	1/0	1/0	1/0	1/0	1/0	1/1	1/0	1/0	1/0	1/0	1/1	1/0	1/0	1/0	1/0	1/0	1/0	1/0	1/0	1/0	1/0	1/0	1/1	1/0	1/0	1/0	1/0	1/1	1/0	1/0	1/0	1/0	1/0	1/0	1/0
NC_037328.1:108748707-108748869(+)	BosSINEL	51.69	48.31	551	515	26	499	8	3	1/0	1/0	1/0	1/0	1/0	1/0	1/0	1/0	1/1	1/0	1/0	1/0	1/0	1/0	1/0	1/0	1/0	1/0	1/0	1/0	1/0	1/0	1/0	1/0	1/1	1/0	1/0	1/0	1/0	1/0	1/0	1/0	1/0	1/0	1/0	1/0	1/0	1/0	1/0	1/0
NC_037328.1:109123970-109124246(+)	BosSINEL	50.19	49.81	536	532	8	520	6	2	1/0	1/0	1/0	1/0	1/0	1/0	1/0	1/0	1/0	1/0	1/0	1/0	1/0	1/0	1/0	1/0	1/0	1/0	1/0	1/0	1/0	1/0	1/0	1/0	1/0	1/0	1/0	1/0	1/0	1/0	1/0	1/0	1/0	1/0	1/0	1/0	1/0	1/0	1/0	1/0
NC_037328.1:109402577-109402847(-)	BosSINEL	50.09	49.91	535	533	3	529	2	2	1/0	1/0	1/0	1/0	1/0	1/0	1/0	1/0	1/0	1/0	1/0	1/0	1/0	1/0	1/0	1/0	1/0	1/0	1/0	1/0	1/0	1/0	1/0	1/0	1/0	1/0	1/0	1/0	1/0	1/0	1/0	1/0	1/0	1/0	1/0	1/0	1/0	1/0	1/0	1/0
NC_037328.1:109741179-109741310(+)	BosSINEL	72.08	27.92	764	296	234	296	0	6	1/0	1/0	1/0	1/0	1/0	1/0	1/0	1/1	1/1	1/1	1/0	1/0	1/1	1/0	1/0	1/0	1/1	1/1	1/0	1/0	1/1	1/0	1/0	1/0	1/0	1/0	1/0	1/0	1/1	1/1	1/0	1/0	1/1	1/1	1/0	1/0	1/0	1/1	1/0	1/1
NC_037328.1:110224406-110224671(-)	BosSINEL	50	50	534	534	5	524	5	2	1/0	1/0	1/0	1/0	1/0	1/0	1/0	1/0	1/0	1/0	1/0	1/0	1/0	1/0	1/0	1/0	1/0	1/0	1/0	1/0	1/0	1/0	1/0	1/0	1/0	1/0	1/0	1/0	1/0	1/0	1/0	1/0	1/0	1/0	1/0	1/0	1/0	1/0	1/0	1/0
NC_037328.1:110279096-110279371(+)	BosSINEL	59.96	40.04	638	426	115	408	9	4	1/1	1/0	1/0	1/0	1/0	1/0	1/0	1/0	1/1	1/1	1/0	1/0	1/0	1/0	1/1	1/0	1/0	1/1	1/0	1/0	1/0	1/0	1/0	1/0	1/0	1/0	1/0	1/0	1/0	1/0	1/0	1/0	1/0	1/0	1/0	1/0	1/0	1/0	1/0	1/0
NC_037328.1:110380632-110380759(-)	BosSINEL	58.21	41.79	617	443	89	439	2	6	1/0	1/0	1/0	1/0	1/0	1/0	1/1	1/0	1/0	1/0	1/0	1/0	1/0	1/0	1/1	1/0	1/0	1/0	1/0	1/0	1/0	1/0	1/0	1/0	1/0	1/0	1/1	1/0	1/0	1/0	1/0	1/0	1/0	1/0	1/0	1/1	1/0	1/0	1/0	1/0
NC_037328.1:110911951-110912168(+)	BosSINEL	50.19	49.81	536	532	2	532	0	2	1/0	1/0	1/0	1/0	1/0	1/0	1/0	1/0	1/0	1/0	1/0	1/0	1/0	1/0	1/0	1/0	1/0	1/0	1/0	1/0	1/0	1/0	1/0	1/0	1/0	1/0	1/0	1/0	1/0	1/0	1/0	1/0	1/0	1/0	1/0	1/0	1/0	1/0	1/0	1/0
NC_037328.1:111019359-111019630(-)	BosSINEL	84.59	15.41	895	163	366	163	0	7	1/1	1/1	1/1	1/1	1/1	1/1	1/0	1/0	1/0	1/1	1/0	1/0	1/0	1/1	1/0	1/1	1/0	1/1	1/0	1/0	1/0	1/0	1/0	1/0	1/0	1/1	1/0	1/1	1/0	1/0	1/0	1/0	1/1	1/0	1/0	1/0	1/0	1/1	1/1	1/0
NC_037328.1:111347065-111347331(+)	BosSINEL	61.56	38.44	655	409	127	401	4	4	1/0	1/1	1/0	1/1	1/0	1/0	1/0	1/0	1/0	1/1	1/1	1/0	1/0	1/0	1/0	1/0	1/0	1/0	1/0	1/0	1/0	1/0	1/0	1/0	1/0	1/0	1/0	1/0	1/0	1/1	1/1	1/0	1/0	1/0	1/0	1/0	1/0	1/0	1/0	1/0
NC_037328.1:111929742-111930013(+)	BosSINEL	74.81	25.19	790	266	266	258	4	8	1/0	1/0	1/0	1/0	1/0	1/1	1/1	1/1	1/0	1/0	1/0	1/0	1/1	1/0	1/1	1/1	1/1	1/0	1/1	1/1	1/0	1/1	1/1	1/0	1/1	1/0	1/1	1/1	1/1	1/1	1/0	1/0	1/1	1/0	1/1	1/0	1/1	1/1	1/0	1/1
NC_037328.1:111941288-111941330(-)	BosSINEL	49.72	50.28	531	537	1	529	4	2	1/0	1/0	1/0	1/0	1/0	1/0	1/0	1/0	1/0	1/0	1/0	1/0	1/0	1/0	1/0	1/0	1/0	1/0	1/0	1/0	1/0	1/0	1/0	1/0	1/0	1/0	1/0	1/0	1/0	1/0	1/0	1/0	1/0	1/0	1/0	1/0	1/0	1/0	1/0	1/0
NC_037328.1:112664582-112664792(+)	BosSINEL	64.73	35.27	690	376	157	376	0	3	1/1	1/1	1/1	1/0	1/1	1/1	1/0	1/0	1/1	1/0	1/0	1/0	1/0	1/0	1/0	1/0	1/0	1/0	1/0	1/0	1/0	1/0	1/0	1/0	1/0	1/0	1/1	1/1	1/0	1/0	1/0	1/0	1/0	1/0	1/0	1/0	1/0	1/0	1/0	1/0
NC_037328.1:112742778-112743058(+)	BosSINEL	51.68	48.32	554	518	25	504	7	0	1/0	1/0	1/0	1/0	1/0	1/0	1/0	1/0	1/0	1/0	1/0	1/0	1/0	1/0	1/1	1/0	1/0	1/0	1/0	1/0	1/0	1/0	1/0	1/0	1/0	1/0	1/0	1/0	1/0	1/0	1/0	1/0	1/0	1/0	1/0	1/0	1/0	1/0	1/0	1/0
NC_037328.1:113029155-113029280(-)	BosSINEL	48.97	51.03	525	547	0	525	11	0	1/0	1/0	1/0	1/0	1/0	1/0	1/0	1/0	1/0	1/0	1/0	1/0	1/0	1/0	1/0	1/0	1/0	1/0	1/0	1/0	1/0	1/0	1/0	1/0	1/0	1/0	1/0	1/0	1/0	1/0	1/0	1/0	1/0	1/0	1/0	1/0	1/0	1/0	1/0	1/0
NC_037328.1:113032760-113033036(+)	BosSINEL	61.99	38.01	662	406	130	402	2	2	1/0	1/0	1/0	1/0	1/0	1/1	1/0	1/0	1/0	1/0	1/0	1/1	1/0	1/0	1/0	1/1	1/1	1/0	1/0	1/0	1/0	1/0	1/0	1/1	1/0	1/0	1/0	1/0	1/1	1/0	1/0	1/0	1/0	1/1	1/0	1/0	1/0	1/0	1/1	1/0
NC_037328.1:113208702-113208982(+)	BosSINEL	84.22	15.78	891	167	365	161	3	7	1/0	1/1	1/1	1/1	1/1	1/1	1/1	1/1	1/1	1/0	1/1	1/0	1/1	1/1	1/1	1/0	1/0	1/1	1/0	1/1	1/1	1/0	1/0	1/1	1/0	1/1	1/0	1/1	1/0	1/1	1/1	1/1	1/1	1/1	1/1	1/1	1/1	1/1	1/1	1/0
NC_037328.1:113450911-113451186(+)	BosSINEL	49.25	50.75	528	544	0	528	8	0	1/0	1/0	1/0	1/0	0/0	1/0	1/0	1/0	1/0	1/0	1/0	1/0	1/0	1/0	1/0	1/0	1/0	1/0	1/0	1/0	1/0	1/0	1/0	1/0	1/0	1/0	1/0	1/0	1/0	1/0	1/0	1/0	1/0	1/0	1/0	1/0	1/0	1/0	1/0	1/0
NC_037328.1:113553376-113553652(+)	BosSINEL	52.72	47.28	562	504	29	504	0	3	1/0	1/0	1/0	1/0	1/0	1/0	1/0	1/1	1/0	1/0	1/0	1/0	1/0	1/0	1/1	1/0	1/0	1/0	1/0	1/0	1/0	1/0	1/0	1/0	1/0	1/0	1/0	1/0	1/0	1/0	1/0	1/0	1/0	1/0	1/0	1/0	1/0	1/0	1/0	1/0
NC_037328.1:113996643-113996706(-)	BosSINEL	42.56	57.44	452	610	20	412	99	5	1/0	1/0	1/0	1/0	1/0	1/0	1/0	1/0	1/0	1/0	1/0	1/0	1/0	1/0	1/0	1/0	1/0	1/0	0/0	0/0	1/0	1/0	1/0	1/0	1/0	1/0	1/0	1/0	1/0	1/1	1/0	1/0	1/0	1/0	1/0	1/0	1/0	1/0	1/0	1/1
NC_037328.1:114019484-114019758(-)	BosSINEL	49.44	50.56	530	542	0	530	6	0	1/0	1/0	1/0	1/0	1/0	1/0	1/0	1/0	1/0	1/0	1/0	1/0	1/0	1/0	1/0	1/0	1/0	1/0	1/0	1/0	1/0	1/0	1/0	1/0	1/0	1/0	1/0	1/0	1/0	1/0	1/0	1/0	1/0	1/0	1/0	1/0	1/0	1/0	1/0	1/0
NC_037328.1:114248320-114248608(-)	BosSINEL	75.95	24.05	796	252	275	246	3	12	1/0	1/0	1/0	1/0	1/1	1/1	1/1	1/1	1/1	1/1	1/1	1/1	1/1	1/1	1/1	1/1	1/1	1/1	1/1	1/1	1/1	1/1	1/1	1/0	1/1	1/0	1/1	1/1	1/1	1/1	1/1	1/1	1/1	1/1	1/1	1/1	1/1	1/1	1/1	1/0
NC_037328.1:114273799-114273932(-)	BosSINEL	50	50	534	534	2	530	2	2	1/0	1/0	1/0	1/0	1/0	1/0	1/0	1/0	1/0	1/0	1/0	1/0	1/0	1/0	1/0	1/0	1/0	1/0	1/0	1/0	1/0	1/0	1/0	1/0	1/0	1/0	1/0	1/0	1/0	1/0	1/0	1/0	1/0	1/0	1/0	1/0	1/0	1/0	1/0	1/0
NC_037328.1:114978161-114978408(+)	BosSINEL	83.62	16.38	888	174	357	174	0	5	1/1	1/1	1/1	1/1	1/0	1/0	1/0	1/0	1/1	1/0	1/1	1/1	1/0	1/1	1/0	1/1	1/0	1/0	1/1	1/1	1/0	1/1	1/0	1/1	1/0	1/0	1/0	1/0	1/1	1/1	1/1	1/1	1/1	1/0	1/1	1/0	1/1	1/0	1/0	1/1
NC_037328.1:115133109-115133383(-)	BosSINEL	48.6	51.4	521	551	0	521	15	0	1/0	1/0	1/0	1/0	1/0	1/0	1/0	1/0	1/0	1/0	1/0	1/0	1/0	1/0	1/0	1/0	1/0	1/0	1/0	1/0	1/0	1/0	1/0	1/0	1/0	1/0	1/0	1/0	1/0	1/0	1/0	1/0	1/0	1/0	1/0	1/0	1/0	1/0	1/0	1/0
NC_037328.1:115429536-115429811(-)	BosSINEL	73.15	26.85	771	283	246	279	2	9	1/1	1/0	1/1	1/1	1/1	1/1	1/0	1/0	1/1	1/0	1/0	1/0	1/0	1/1	1/0	1/1	1/0	1/0	1/0	1/0	1/0	1/0	1/0	1/0	1/0	1/0	1/1	1/0	1/1	1/0	1/1	1/0	1/0	1/1	1/0	1/0	1/1	1/0	1/0	1/0
NC_037328.1:116997367-116997642(-)	BosSINEL	56.65	43.35	605	463	73	459	2	2	1/0	1/0	1/0	1/0	1/0	1/0	1/0	1/0	1/0	1/0	1/0	1/0	1/0	1/0	1/0	1/0	1/1	1/1	1/0	1/0	1/0	1/0	1/0	1/0	1/0	1/0	1/0	1/0	1/1	1/0	1/0	1/0	1/0	1/0	1/0	1/0	1/0	1/0	1/0	1/0
NC_037328.1:118247971-118248102(+)	BosSINEL	49.63	50.37	530	538	3	524	7	2	1/0	1/0	1/0	1/0	1/0	1/0	1/0	1/0	1/0	1/0	1/0	1/0	1/0	1/0	1/0	1/0	1/0	1/0	1/0	1/0	1/0	1/0	1/0	1/0	1/0	1/0	1/0	1/0	1/0	1/0	1/0	1/0	1/0	1/0	1/0	1/0	1/0	1/0	1/0	1/0
NC_037328.1:118437128-118437401(+)	BosSINEL	49.53	50.47	530	540	0	530	5	1	1/0	1/0	1/0	1/0	1/0	1/0	1/0	1/0	1/0	1/0	1/0	1/0	1/0	1/0	1/0	1/0	1/0	1/0	1/0	1/0	1/0	1/0	1/0	1/0	1/0	1/0	1/0	1/0	1/0	1/0	1/0	1/0	1/0	1/0	1/0	1/0	1/0	1/0	1/0	1/0
NC_037328.1:119438887-119438985(+)	BosSINEL	63.57	36.43	670	384	147	376	4	9	1/0	1/0	1/0	1/0	1/0	1/0	1/0	1/1	1/0	1/0	1/0	1/0	1/0	1/0	1/0	1/0	1/0	1/0	1/0	1/0	1/0	1/0	1/0	1/0	1/0	1/0	1/1	1/0	1/0	1/0	1/0	1/0	1/0	1/0	1/0	1/0	1/0	1/0	1/0	1/0
NC_037328.1:120362133-120362264(+)	BosSINEL	54.98	45.02	585	479	55	475	2	4	1/0	1/0	1/0	1/0	1/1	1/1	1/0	1/1	1/0	1/0	1/1	1/0	1/0	1/0	1/0	1/0	1/0	1/0	1/0	1/0	1/0	1/0	1/0	1/0	1/0	1/0	1/0	1/0	1/0	1/0	1/0	1/0	1/0	1/0	1/0	1/1	1/0	1/0	1/0	1/0
NC_037328.1:120427908-120428040(+)	BosSINEL	66.82	33.18	711	353	181	349	2	4	1/0	1/0	1/0	1/0	1/1	1/1	1/1	1/1	1/0	1/1	1/1	1/1	1/1	1/1	1/0	1/1	1/1	1/1	1/1	1/1	1/0	1/0	1/0	1/1	1/1	1/1	1/0	1/1	1/0	1/1	1/0	1/1	1/0	1/1	1/1	1/1	1/1	1/0	1/0	1/1
NC_037328.1:120492094-120492369(-)	BosSINEL	49.81	50.19	534	538	0	534	2	0	1/0	1/0	1/0	1/0	1/0	1/0	1/0	1/0	1/0	1/0	1/0	1/0	1/0	1/0	1/0	1/0	1/0	1/0	1/0	1/0	1/0	1/0	1/0	1/0	1/0	1/0	1/0	1/0	1/0	1/0	1/0	1/0	1/0	1/0	1/0	1/0	1/0	1/0	1/0	1/0
NC_037328.1:121158612-121158782(+)	BosSINEL	60.98	39.02	650	416	121	408	4	3	1/0	1/0	1/1	1/0	1/0	1/0	1/0	1/0	1/0	1/0	1/0	1/0	1/0	1/0	1/0	1/0	1/0	1/0	1/0	1/0	1/0	1/0	1/0	1/0	1/0	1/0	1/0	1/0	1/0	1/0	1/0	1/0	1/0	1/0	1/0	1/0	1/0	1/0	1/0	1/0
NC_037328.1:121254217-121254493(+)	BosSINEL	80.32	19.68	853	209	324	205	2	5	1/1	1/1	1/0	1/1	1/1	1/0	1/0	1/0	1/0	1/1	1/1	1/1	1/0	1/0	1/0	1/0	1/0	1/1	1/0	1/0	1/1	1/1	1/0	1/0	1/1	1/1	1/0	1/1	1/1	1/0	1/0	1/0	1/1	1/0	1/0	1/1	1/0	1/0	1/0	1/0
NC_037328.1:121403220-121403488(-)	BosSINEL	53.3	46.7	566	496	38	490	3	5	1/0	1/0	1/0	1/0	1/0	1/0	1/0	1/0	1/0	1/0	1/0	1/0	1/1	1/0	1/0	1/0	1/0	1/1	1/0	1/0	1/0	1/0	1/0	1/0	1/0	1/0	1/0	1/0	1/0	1/0	1/0	1/0	1/1	1/0	1/0	1/0	1/0	1/0	1/0	1/0
NC_037328.1:121818483-121818619(-)	BosSINEL	49.63	50.37	531	539	4	523	8	1	1/0	1/0	1/0	1/0	1/0	1/0	1/0	1/0	1/0	1/0	1/0	1/0	1/0	1/0	1/0	1/0	1/0	1/0	1/0	1/0	1/0	1/0	1/0	1/0	1/0	1/0	1/0	1/0	1/0	1/0	1/0	1/0	1/0	1/0	1/0	1/0	1/0	1/0	1/0	1/0
NC_037328.1:122383137-122383412(-)	BosSINEL	50.19	49.81	536	532	6	524	4	2	1/0	1/0	1/0	1/0	1/0	1/0	1/0	1/0	1/0	1/0	1/0	1/0	1/0	1/0	1/0	1/0	1/0	1/0	1/0	1/0	1/0	1/0	1/0	1/0	1/0	1/0	1/0	1/0	1/0	1/0	1/0	1/0	1/0	1/0	1/0	1/0	1/0	1/0	1/0	1/0
NC_037328.1:123284302-123284540(+)	BosSINEL	49.62	50.38	529	537	2	525	6	3	1/0	1/0	1/0	1/0	1/0	1/0	1/0	1/0	1/0	1/0	1/0	1/0	1/0	1/0	1/0	1/0	1/0	1/0	1/0	1/0	1/0	1/0	1/0	1/0	1/0	1/0	1/0	1/0	1/0	1/0	1/0	1/0	1/0	1/0	1/0	1/0	1/0	1/0	1/0	1/0
NC_037328.1:123350658-123350931(-)	BosSINEL	71.63	28.37	765	303	233	299	2	2	1/0	1/1	1/1	1/1	1/0	1/0	1/0	1/0	1/0	1/1	1/0	1/0	1/0	1/1	1/0	1/0	1/0	1/0	1/0	1/0	1/0	1/0	1/0	1/1	1/1	1/0	1/0	1/1	1/0	1/0	1/0	1/0	1/0	1/0	1/0	1/0	1/0	1/0	1/0	1/0
NC_037328.1:123360775-123361035(-)	BosSINEL	64.88	35.12	689	373	158	373	0	5	1/0	1/0	1/0	1/0	1/1	1/0	1/0	1/1	1/1	1/0	1/0	1/0	1/1	1/1	1/0	1/0	1/0	1/0	1/0	1/0	1/1	1/0	1/0	1/1	1/0	1/0	1/0	1/0	1/0	1/0	1/0	1/0	1/1	1/0	1/0	1/0	1/0	1/0	1/0	1/0
NC_037328.1:123903537-123903809(+)	BosSINEL	88.45	11.55	934	122	406	122	0	8	1/1	1/1	1/1	1/1	1/1	1/1	1/1	1/1	1/0	1/1	1/1	1/1	1/1	1/1	1/1	1/1	1/1	1/1	1/1	1/0	1/0	1/1	1/0	1/1	1/1	1/1	1/1	1/0	1/1	1/1	1/1	1/1	1/0	1/1	1/0	1/0	1/1	1/1	1/1	1/0
NC_037328.1:124488311-124488587(-)	BosSINEL	71.37	28.63	758	304	230	298	3	5	1/0	1/0	1/0	1/0	1/1	1/0	1/0	1/0	1/0	1/0	1/0	1/1	1/0	1/0	1/0	1/0	1/0	1/0	1/0	1/0	1/0	1/0	1/0	1/1	1/0	1/1	1/0	1/0	1/0	1/1	1/0	1/0	1/0	1/1	1/0	1/0	1/1	1/0	1/0	1/0
NC_037328.1:124612796-124613070(-)	BosSINEL	49.44	50.56	530	542	0	530	6	0	1/0	1/0	1/0	1/0	1/0	1/0	1/0	1/0	1/0	1/0	1/0	1/0	1/0	1/0	1/0	1/0	1/0	1/0	1/0	1/0	1/0	1/0	1/0	1/0	1/0	1/0	1/0	1/0	1/0	1/0	1/0	1/0	1/0	1/0	1/0	1/0	1/0	1/0	1/0	1/0
NC_037328.1:124785201-124785461(+)	BosSINEL	79.4	20.6	840	218	313	214	2	7	1/1	1/1	1/1	1/0	1/1	1/1	1/1	1/0	1/1	1/1	1/1	1/1	1/1	1/1	1/0	1/1	1/1	1/1	1/1	1/1	1/1	1/0	1/1	1/1	1/1	1/1	1/1	1/0	1/0	1/0	1/1	1/1	1/1	1/1	1/1	1/1	1/1	1/1	1/1	1/0
NC_037328.1:126920546-126920815(-)	BosSINEL	85.43	14.57	909	155	377	155	0	4	1/0	1/1	1/1	1/1	1/1	1/1	1/0	1/0	1/0	1/1	1/1	1/0	1/1	1/1	1/1	1/1	1/1	1/0	1/1	1/1	1/0	1/0	1/1	1/1	1/1	1/0	1/1	1/1	1/0	1/0	1/1	1/1	1/1	1/1	1/0	1/0	1/1	1/0	1/1	1/1
NC_037328.1:127113029-127113279(+)	BosSINEL	59.96	40.04	632	422	112	408	7	9	1/1	1/1	1/0	1/0	1/0	1/0	1/0	1/0	1/0	1/0	1/0	1/0	1/0	1/0	1/0	1/1	1/0	1/0	1/0	1/0	1/0	1/0	1/0	1/0	1/0	1/0	1/1	1/0	1/0	1/1	1/0	1/0	1/0	1/0	1/0	1/0	1/0	1/0	1/0	1/0
NC_037328.1:127211403-127211663(-)	BosSINEL	50.75	49.25	540	524	14	512	6	4	1/0	1/0	1/0	1/0	1/0	1/0	1/0	1/0	1/0	1/0	1/0	1/0	1/0	1/0	1/0	1/0	1/0	1/0	1/0	1/0	1/0	1/0	1/0	1/0	1/0	1/0	1/0	1/0	1/0	1/0	1/0	1/0	1/0	1/0	1/0	1/0	1/0	1/0	1/0	1/0
NC_037328.1:127317749-127318019(+)	BosSINEL	50.28	49.72	536	530	11	514	8	3	1/0	1/0	1/0	1/0	1/0	1/0	1/0	1/0	1/0	1/0	1/0	1/0	1/0	1/0	1/0	1/0	1/0	1/0	1/0	1/0	1/0	1/0	1/0	1/0	1/0	1/0	1/0	1/0	1/0	1/0	1/0	1/0	1/0	1/0	1/0	1/0	1/0	1/0	1/0	1/0
NC_037328.1:127614582-127614857(+)	BosSINEL	49.91	50.09	533	535	7	519	8	2	1/0	1/0	1/0	1/0	1/0	1/0	1/0	1/0	1/0	1/0	1/0	1/0	1/0	1/0	1/0	1/0	1/0	1/0	1/0	1/0	1/0	1/0	1/0	1/0	1/0	1/0	1/0	1/0	1/0	1/0	1/0	1/0	1/0	1/0	1/0	1/0	1/0	1/0	1/0	1/0
NC_037328.1:127960397-127960527(-)	BosSINEL	49.07	50.93	526	546	0	526	10	0	1/0	1/0	1/0	1/0	1/0	1/0	1/0	1/0	1/0	1/0	1/0	1/0	1/0	1/0	1/0	1/0	1/0	1/0	1/0	1/0	1/0	1/0	1/0	1/0	1/0	1/0	1/0	1/0	1/0	1/0	1/0	1/0	1/0	1/0	1/0	1/0	1/0	1/0	1/0	1/0
NC_037328.1:128122571-128122841(-)	BosSINEL	49.44	50.56	528	540	0	528	6	2	1/0	1/0	1/0	1/0	1/0	1/0	1/0	1/0	1/0	1/0	1/0	1/0	1/0	1/0	1/0	1/0	1/0	1/0	1/0	1/0	1/0	1/0	1/0	1/0	1/0	1/0	1/0	1/0	1/0	1/0	1/0	1/0	1/0	1/0	1/0	1/0	1/0	1/0	1/0	1/0
NC_037328.1:129126162-129126437(+)	BosSINEL	76.6	23.4	812	248	283	246	1	6	1/0	1/0	1/1	1/0	1/1	1/1	1/0	1/0	1/0	1/1	1/1	1/1	1/1	1/0	1/0	1/1	1/0	1/1	1/0	1/1	1/1	1/0	1/0	1/0	1/1	1/0	1/0	1/0	1/1	1/0	1/1	1/0	1/0	1/0	1/1	1/0	1/1	1/0	1/0	1/0
NC_037328.1:129139231-129139507(+)	BosSINEL	49.06	50.94	524	544	0	524	10	2	1/0	1/0	1/0	1/0	1/0	1/0	1/0	1/0	1/0	1/0	1/0	1/0	1/0	1/0	1/0	1/0	1/0	1/0	1/0	1/0	1/0	1/0	1/0	1/0	1/0	1/0	1/0	1/0	1/0	1/0	1/0	1/0	1/0	1/0	1/0	1/0	1/0	1/0	1/0	1/0
NC_037328.1:129469948-129470225(+)	BosSINEL	49.63	50.37	531	539	1	529	5	1	1/0	1/0	1/0	1/0	1/0	1/0	1/0	1/0	1/0	1/0	1/0	1/0	1/0	1/0	1/0	1/0	1/0	1/0	1/0	1/0	1/0	1/0	1/0	1/0	1/0	1/0	1/0	1/0	1/0	1/0	1/0	1/0	1/0	1/0	1/0	1/0	1/0	1/0	1/0	1/0
NC_037328.1:130048537-130048670(-)	BosSINEL	56.2	43.8	598	466	72	454	6	4	1/0	1/0	1/0	1/0	1/0	1/0	1/0	1/0	1/0	1/0	1/0	1/0	1/0	1/0	1/0	1/0	1/0	1/0	1/0	1/0	1/0	1/0	1/0	1/0	1/0	1/0	1/0	1/1	1/0	1/1	1/0	1/1	1/0	1/0	1/0	1/0	1/0	1/0	1/1	1/0
NC_037328.1:130990024-130990300(-)	BosSINEL	49.53	50.47	529	539	0	529	5	2	1/0	1/0	1/0	1/0	1/0	1/0	1/0	1/0	1/0	1/0	1/0	1/0	1/0	1/0	1/0	1/0	1/0	1/0	1/0	1/0	1/0	1/0	1/0	1/0	1/0	1/0	1/0	1/0	1/0	1/0	1/0	1/0	1/0	1/0	1/0	1/0	1/0	1/0	1/0	1/0
NC_037328.1:131088987-131089259(+)	BosSINEL	59.3	40.7	631	433	100	431	1	4	1/0	1/0	1/0	1/0	1/1	1/0	1/1	1/1	1/0	1/1	1/0	1/0	1/0	1/0	1/0	1/1	1/0	1/1	1/0	1/1	1/0	1/0	1/0	1/0	1/1	1/0	1/0	1/0	1/0	1/0	1/0	1/0	1/0	1/0	1/0	1/0	1/0	1/0	1/0	1/1
NC_037328.1:131536722-131536973(-)	BosSINEL	51.31	48.69	550	522	23	504	9	0	1/0	1/0	1/0	1/0	1/0	1/0	1/0	1/0	1/0	1/0	1/0	1/0	1/0	1/0	1/0	1/0	1/0	1/0	1/0	1/0	1/0	1/0	1/0	1/0	1/0	1/0	1/0	1/0	1/0	1/0	1/0	1/0	1/0	1/0	1/0	1/0	1/0	1/0	1/0	1/0
NC_037328.1:131571641-131571902(-)	BosSINEL	43.27	56.73	463	607	0	463	72	1	1/0	1/0	1/0	1/0	1/0	1/0	1/0	1/0	1/0	1/0	1/0	1/0	1/0	1/0	1/0	1/0	1/0	1/0	1/0	1/0	1/0	1/0	1/0	1/0	1/0	1/0	1/0	1/0	0/0	1/0	1/0	1/0	1/0	1/0	1/0	0/0	1/0	1/0	1/0	1/0
NC_037328.1:132957239-132957504(-)	BosSINEL	89.59	10.41	955	111	422	111	0	3	1/1	1/1	1/0	1/0	1/1	1/1	1/1	1/1	1/1	1/1	1/0	1/1	1/1	1/1	1/1	1/1	1/1	1/1	1/1	1/1	1/0	1/1	1/1	1/1	1/1	1/0	1/1	1/1	1/1	1/1	1/0	1/1	1/1	1/0	1/1	1/1	1/1	1/1	1/1	1/1
NC_037328.1:132974577-132974851(+)	BosSINEL	81.46	18.54	870	198	337	196	1	2	1/1	1/0	1/1	1/1	1/1	1/0	1/0	1/0	1/1	1/1	1/1	1/0	1/0	1/0	1/0	1/1	1/1	1/1	1/0	1/1	1/1	1/1	1/1	1/0	1/1	1/1	1/0	1/1	1/1	1/1	1/0	1/1	1/0	1/1	1/1	1/0	1/1	1/0	1/1	1/0
NC_037328.1:133009224-133009445(-)	BosSINEL	50	50	533	533	5	523	5	3	1/0	1/0	1/0	1/0	1/0	1/0	1/0	1/0	1/0	1/0	1/0	1/0	1/0	1/0	1/0	1/0	1/0	1/0	1/0	1/0	1/0	1/0	1/0	1/0	1/0	1/0	1/0	1/0	1/0	1/0	1/0	1/0	1/0	1/0	1/0	1/0	1/0	1/0	1/0	1/0
NC_037328.1:133877652-133877930(-)	BosSINEL	70.32	29.68	744	314	223	298	8	7	1/1	1/1	1/1	1/1	1/0	1/0	1/0	1/0	1/0	1/0	1/0	1/0	1/0	1/0	1/0	1/0	1/0	1/0	1/0	1/0	1/0	1/0	1/1	1/0	1/0	1/0	1/0	1/0	1/0	1/0	1/0	1/0	1/0	1/0	1/0	1/0	1/0	1/0	1/0	1/0
NC_037328.1:134639456-134639591(-)	BosSINEL	61.05	38.95	652	416	120	412	2	2	1/0	1/0	1/0	1/0	1/0	1/1	1/0	1/1	1/0	1/0	1/0	1/1	1/0	1/0	1/0	1/0	1/0	1/0	1/1	1/0	1/0	1/0	1/0	1/1	1/0	1/0	1/1	1/0	1/0	1/0	1/0	1/0	1/0	1/0	1/1	1/0	1/0	1/0	1/0	1/0
NC_037328.1:135045185-135045452(+)	BosSINEL	55.99	44.01	598	470	65	468	1	2	1/0	1/0	1/0	1/0	1/0	1/0	1/0	1/0	1/0	1/0	1/0	1/0	1/0	1/1	1/0	1/0	1/0	1/0	1/0	1/0	1/0	1/0	1/0	1/0	1/0	1/0	1/0	1/0	1/0	1/0	1/0	1/0	1/0	1/0	1/0	1/0	1/0	1/0	1/0	1/0
NC_037328.1:135701646-135701911(-)	BosSINEL	50.2	49.8	513	509	53	407	51	25	1/0	1/0	1/0	1/0	1/0	1/0	1/0	1/0	1/0	1/0	1/0	1/0	0/0	1/0	1/0	1/0	0/0	1/0	1/0	1/0	1/0	1/0	1/0	1/0	1/0	1/0	1/0	1/0	1/0	1/0	1/0	1/0	1/0	1/0	0/0	1/0	1/0	1/0	1/0	1/1
NC_037328.1:135710209-135710485(-)	BosSINEL	49.91	50.09	532	534	6	520	7	3	1/0	1/0	1/0	1/0	1/0	1/0	1/0	1/0	1/0	1/0	1/0	1/0	1/0	1/0	1/0	1/0	1/0	1/0	1/0	1/0	1/0	1/0	1/0	1/0	1/0	1/0	1/0	1/0	1/1	1/0	1/0	1/0	1/0	0/0	1/0	1/0	1/0	1/0	1/0	1/0
NC_037328.1:136553322-136553581(+)	BosSINEL	88.88	11.12	935	117	409	117	0	10	1/1	1/1	1/1	1/0	1/1	1/1	1/1	1/1	1/0	1/0	1/1	1/1	1/1	1/0	1/0	1/0	1/0	1/0	1/1	1/1	1/1	1/1	1/1	1/1	1/0	1/0	1/1	1/0	1/1	1/1	1/1	1/1	1/1	1/1	1/1	1/0	1/1	1/1	1/1	1/0
NC_037328.1:137085026-137085297(-)	BosSINEL	57.39	42.61	598	444	180	238	103	15	1/0	1/0	1/0	1/1	0/0	1/1	1/1	1/0	0/0	1/0	1/0	1/1	1/0	1/0	1/0	1/1	1/0	1/1	1/0	1/0	1/1	1/0	1/0	1/0	0/0	1/1	0/0	1/0	1/1	1/1	1/1	1/0	1/0	1/0	1/1	1/0	1/0	1/0	1/0	0/0
NC_037328.1:137391993-137392130(-)	BosSINEL	80.23	19.77	844	208	320	204	2	10	1/1	1/1	1/1	1/0	1/1	1/1	1/1	1/1	1/0	1/0	1/0	1/0	1/0	1/0	1/0	1/0	1/0	1/0	1/1	1/0	1/0	1/1	1/1	1/1	1/1	1/1	1/0	1/0	1/0	1/0	1/0	1/0	1/0	1/1	1/1	1/0	1/0	1/0	1/0	1/0
NC_037328.1:137561486-137561759(+)	BosSINEL	88.32	11.68	938	124	407	124	0	5	1/0	1/0	1/0	1/1	1/1	1/1	1/1	1/1	1/1	1/1	1/1	1/1	1/1	1/1	1/1	1/1	1/1	1/1	1/1	1/1	1/1	1/1	1/1	1/1	1/1	1/1	1/1	1/1	1/1	1/1	1/1	1/1	1/1	1/1	1/1	1/1	1/1	1/1	1/1	1/1
NC_037328.1:137923222-137923494(-)	BosSINEL	63.25	36.75	673	391	149	375	8	4	1/1	1/0	1/0	1/1	1/0	1/0	1/0	1/0	1/0	1/0	1/0	1/0	1/0	1/0	1/1	1/0	1/0	1/0	1/0	1/0	1/0	1/0	1/0	1/0	1/0	1/0	1/0	1/0	1/1	1/0	1/0	1/1	1/0	1/0	1/0	1/0	1/1	1/0	1/0	1/0
NC_037328.1:137998166-137998437(-)	BosSINEL	52.35	47.65	557	507	29	499	4	4	1/0	1/0	1/0	1/0	1/0	1/0	1/0	1/0	1/0	1/0	1/0	1/0	1/0	1/0	1/0	1/0	1/0	1/0	1/0	1/0	1/0	1/0	1/0	1/0	1/0	1/0	1/0	1/0	1/0	1/0	1/0	1/0	1/0	1/0	1/0	1/0	1/0	1/0	1/0	1/0
NC_037328.1:138087165-138087438(+)	BosSINEL	65.26	34.74	697	371	171	355	8	2	1/1	1/1	1/0	1/0	1/0	1/0	1/0	1/0	1/0	1/1	1/0	1/1	1/0	1/0	1/0	1/0	1/0	1/0	1/0	1/0	1/0	1/1	1/0	1/0	1/0	1/0	1/0	1/0	1/0	1/0	1/0	1/0	1/0	1/0	1/0	1/0	1/0	1/0	1/0	1/0
NC_037328.1:138090049-138090308(+)	BosSINEL	50.09	49.91	535	533	3	529	2	2	1/0	1/0	1/0	1/0	1/0	1/0	1/0	1/0	1/0	1/0	1/0	1/0	1/0	1/0	1/0	1/0	1/0	1/0	1/0	1/0	1/0	1/0	1/0	1/0	1/0	1/0	1/0	1/0	1/0	1/0	1/0	1/0	1/0	1/0	1/0	1/0	1/0	1/0	1/0	1/0
NC_037328.1:138283678-138283953(+)	BosSINEL	65.72	34.28	694	362	170	354	4	8	1/0	1/0	1/0	1/0	1/0	1/0	1/0	1/1	1/0	1/1	1/0	1/0	1/0	1/0	1/0	1/0	1/0	1/0	1/1	1/1	1/0	1/1	1/0	1/1	1/0	1/0	1/0	1/0	1/0	1/0	1/1	0/0	1/1	1/0	1/0	1/0	1/0	1/0	1/0	1/0
NC_037328.1:139606418-139606696(+)	BosSINEL	49.91	50.09	533	535	12	509	13	2	1/0	1/0	1/0	1/0	1/0	1/0	1/0	1/0	1/0	1/0	1/0	1/0	1/0	1/0	1/0	1/0	1/0	1/0	1/0	1/0	1/0	1/0	1/0	1/0	1/0	1/0	1/0	1/0	1/0	1/0	1/0	1/0	1/0	1/0	1/0	1/0	1/0	1/0	1/0	1/0
NC_037328.1:139934401-139934662(+)	BosSINEL	75.71	24.29	804	258	280	244	7	5	1/1	1/1	1/1	1/1	1/0	1/0	1/0	1/0	1/0	1/0	1/0	1/0	1/0	1/0	1/1	1/0	1/0	1/0	1/0	1/0	1/1	1/0	1/0	1/0	1/0	1/0	1/0	1/0	1/0	1/0	1/0	1/0	1/0	1/1	1/0	1/0	1/1	1/1	1/0	1/0
NC_037328.1:140360496-140360753(+)	BosSINEL	79.73	20.27	842	214	317	208	3	8	1/0	1/1	1/1	1/0	1/0	1/1	1/1	1/1	1/0	1/1	1/1	1/1	1/0	1/1	1/0	1/1	1/1	1/1	1/0	1/1	1/0	1/0	1/1	1/0	1/1	1/1	1/0	1/1	1/0	1/1	1/1	1/0	1/0	1/1	1/0	1/0	1/0	1/1	1/1	1/0
NC_037328.1:140632678-140632953(-)	BosSINEL	77.28	22.72	813	239	296	221	9	10	1/1	1/1	1/1	1/1	1/0	1/0	1/1	1/0	1/0	1/0	1/0	1/1	1/1	1/1	1/0	1/0	1/1	1/1	1/0	1/0	NA	1/0	1/1	1/0	1/1	1/0	1/0	1/0	1/1	1/0	1/0	1/0	1/0	1/1	1/0	1/0	1/0	1/0	1/0	1/0
NC_037328.1:140798276-140798535(+)	BosSINEL	50.09	49.91	534	532	11	512	10	3	1/0	1/0	1/0	1/0	1/0	1/0	1/0	1/0	1/0	1/0	1/0	1/0	1/0	1/0	1/0	1/0	1/0	1/0	1/0	1/0	1/0	1/0	1/0	1/0	1/0	1/0	1/0	1/0	1/0	1/0	1/0	1/0	1/0	1/0	1/0	1/0	1/0	1/0	1/0	1/0
NC_037328.1:141223484-141223614(-)	BosSINEL	89.62	10.38	950	110	420	110	0	6	1/1	1/1	1/1	1/1	1/1	1/0	1/1	1/0	1/0	1/1	1/0	1/0	1/1	1/1	1/1	1/0	1/0	1/1	1/1	1/0	1/1	1/0	1/1	1/0	1/0	1/0	1/0	1/1	1/0	1/0	1/1	1/1	1/1	1/1	1/0	1/1	1/0	1/1	1/1	1/1
NC_037328.1:141566341-141566616(+)	BosSINEL	55.56	44.44	570	456	189	192	132	23	1/0	1/0	1/1	1/1	1/0	1/0	1/1	1/1	0/0	1/0	0/0	1/1	1/1	0/0	1/0	1/0	1/0	1/0	1/1	1/0	1/1	1/0	0/0	0/0	1/0	0/0	1/0	1/0	1/0	1/1	1/0	0/0	0/0	1/1	1/1	1/0	1/0	1/0	0/0	0/0
NC_037328.1:141569654-141569923(+)	BosSINEL	81.7	18.3	866	194	336	194	0	6	1/0	1/0	1/0	1/0	1/1	1/1	1/1	1/1	1/1	1/1	1/1	1/1	1/1	1/1	1/1	1/0	1/1	1/1	1/0	1/1	1/1	1/1	1/1	1/1	1/1	1/0	1/1	1/1	1/1	1/1	1/1	1/1	1/1	1/1	1/1	1/1	1/1	1/1	1/1	1/1
NC_037328.1:141584419-141584694(-)	BosSINEL	88.55	11.45	928	120	404	120	0	12	1/0	1/1	1/1	1/0	1/0	1/0	1/1	1/1	1/1	1/1	1/1	1/0	1/1	1/1	1/1	1/1	1/0	1/1	1/1	1/1	1/0	1/1	1/1	1/1	1/1	1/1	1/1	1/1	1/1	1/1	1/0	1/1	1/1	1/1	1/1	1/1	1/1	1/1	1/1	1/1
NC_037328.1:141729379-141729464(+)	BosSINEL	50.47	49.53	540	530	12	516	7	1	1/0	1/0	1/0	1/0	1/0	1/0	1/0	1/0	1/0	1/0	1/0	1/0	1/0	1/0	1/0	1/0	1/0	1/0	1/0	1/0	1/0	1/0	1/0	1/0	1/0	1/0	1/0	1/0	1/0	1/0	1/0	1/0	1/0	1/0	1/0	1/0	1/0	1/0	1/0	1/0
NC_037328.1:141795065-141795329(+)	BosSINEL	49.35	50.65	529	543	4	521	11	0	1/0	1/0	1/0	1/0	1/0	1/0	1/0	1/0	1/0	1/0	1/0	1/0	0/0	1/0	1/0	1/0	1/0	1/0	1/0	1/0	1/0	1/0	1/0	1/0	1/0	1/0	1/0	1/0	1/0	1/0	1/0	1/0	1/0	1/0	1/0	1/0	1/0	1/0	1/0	1/0
NC_037328.1:142045318-142045592(+)	BosSINEL	50.37	49.63	539	531	8	523	4	1	1/0	1/0	1/0	1/0	1/0	1/0	1/0	1/0	1/0	1/0	1/0	1/0	1/0	1/0	1/0	1/0	1/0	1/0	1/0	1/0	1/0	1/0	1/0	1/0	1/0	1/0	1/0	1/0	1/0	1/0	1/0	1/0	1/0	1/0	1/0	1/0	1/0	1/0	1/0	1/0
NC_037328.1:142579164-142579268(-)	BosSINEL	51.99	48.01	549	507	30	489	9	8	1/0	1/0	1/0	1/0	1/0	1/1	1/0	1/0	1/0	1/0	1/0	1/0	1/0	1/0	1/0	1/1	1/0	1/0	1/0	1/0	1/0	1/0	1/0	1/0	1/0	1/0	1/0	1/0	1/0	1/0	1/0	1/0	1/0	1/0	1/0	1/0	1/0	1/0	1/1	1/0
NC_037328.1:143658830-143659092(+)	BosSINEL	52.26	47.74	555	507	30	495	6	5	1/0	1/0	1/0	1/0	1/0	1/0	1/0	1/0	1/0	1/0	1/0	1/0	1/0	1/0	1/0	1/0	1/0	1/0	1/0	1/0	1/0	1/0	1/0	1/0	1/0	1/0	1/0	1/0	1/0	1/0	1/0	1/0	1/0	1/0	1/0	1/0	1/0	1/0	1/0	1/0
NC_037328.1:144524960-144525369(-)	BosSINEL	51.97	48.03	554	512	25	504	4	3	1/0	1/0	1/0	1/0	1/0	1/0	1/0	1/0	1/0	1/0	1/0	1/0	1/1	1/0	1/0	1/0	1/0	1/0	1/0	1/0	1/0	1/0	1/0	1/0	1/0	1/0	1/0	1/0	1/0	1/0	1/0	1/0	1/0	1/1	1/0	1/0	1/0	1/0	1/0	1/0
NC_037328.1:144932105-144932380(-)	BosSINEL	82.29	17.71	864	186	341	182	2	11	1/1	1/1	1/1	1/1	1/1	1/1	1/1	1/1	1/0	1/0	1/1	1/1	1/1	1/1	1/1	1/0	1/0	1/0	1/1	1/1	1/1	1/1	1/0	1/0	1/0	1/0	1/0	1/1	1/1	1/1	1/0	1/0	1/1	1/0	1/0	1/1	1/1	1/0	1/1	1/0
NC_037328.1:145502187-145502456(-)	BosSINEL	50.19	49.81	536	532	6	524	4	2	1/0	1/0	1/0	1/0	1/0	1/0	1/0	1/0	1/0	1/0	1/0	1/0	1/0	1/0	1/0	1/0	1/0	1/0	1/0	1/0	1/0	1/0	1/0	1/0	1/0	1/0	1/0	1/0	1/0	1/0	1/0	1/0	1/0	1/0	1/0	1/0	1/0	1/0	1/0	1/0
NC_037328.1:146304652-146304917(-)	BosSINEL	48.88	51.12	522	546	0	522	12	2	1/0	1/0	1/0	1/0	1/0	1/0	1/0	1/0	1/0	1/0	1/0	1/0	1/0	1/0	1/0	1/0	1/0	1/0	1/0	1/0	1/0	1/0	1/0	1/0	1/0	1/0	1/0	1/0	1/0	1/0	1/0	1/0	1/0	1/0	1/0	1/0	1/0	1/0	1/0	1/0
NC_037328.1:146446745-146447020(-)	BosSINEL	49.72	50.28	531	537	1	529	4	2	1/0	1/0	1/0	1/0	1/0	1/0	1/0	1/0	1/0	1/0	1/0	1/0	1/0	1/0	1/0	1/0	1/0	1/0	1/0	1/0	1/0	1/0	1/0	1/0	1/0	1/0	1/0	1/0	1/0	1/0	1/0	1/0	1/0	1/0	1/0	1/0	1/0	1/0	1/0	1/0
NC_037328.1:146520157-146520432(+)	BosSINEL	49.25	50.75	528	544	0	528	8	0	1/0	1/0	1/0	1/0	1/0	1/0	1/0	1/0	1/0	1/0	1/0	1/0	1/0	1/0	1/0	1/0	1/0	1/0	1/0	1/0	1/0	1/0	1/0	1/0	1/0	1/0	1/0	1/0	1/0	1/0	1/0	1/0	1/0	1/0	1/0	1/0	1/0	1/0	1/0	1/0
NC_037328.1:146626146-146626381(+)	BosSINEL	49.53	50.47	529	539	0	529	5	2	1/0	1/0	1/0	1/0	1/0	1/0	1/0	1/0	1/0	1/0	1/0	1/0	1/0	1/0	1/0	1/0	1/0	1/0	1/0	1/0	1/0	1/0	1/0	1/0	1/0	1/0	1/0	1/0	1/0	1/0	1/0	1/0	1/0	1/0	1/0	1/0	1/0	1/0	1/0	1/0
NC_037328.1:146960957-146961071(+)	BosSINEL	48.69	51.31	522	550	0	522	14	0	1/0	1/0	1/0	1/0	1/0	1/0	1/0	1/0	1/0	1/0	1/0	1/0	1/0	1/0	1/0	1/0	1/0	1/0	1/0	1/0	1/0	1/0	1/0	1/0	1/0	1/0	1/0	1/0	1/0	1/0	1/0	1/0	1/0	1/0	1/0	1/0	1/0	1/0	1/0	1/0
NC_037328.1:147283435-147283711(-)	BosSINEL	48.78	51.22	521	547	1	519	14	2	1/0	1/0	1/0	1/0	1/0	1/0	1/0	1/0	1/0	1/0	1/0	1/0	1/0	1/0	1/0	1/0	1/0	1/0	1/0	1/0	1/0	1/0	1/0	1/0	1/0	1/0	1/0	1/0	1/0	1/0	1/0	1/0	1/0	1/0	1/0	1/0	1/0	1/0	1/0	1/0
NC_037328.1:147289141-147289389(+)	BosSINEL	58.08	41.92	618	446	92	434	6	4	1/0	1/0	1/0	1/0	1/0	1/0	1/0	1/0	1/0	1/0	1/0	1/0	1/1	1/0	1/0	1/0	1/1	1/0	1/0	1/0	1/0	1/0	1/0	1/1	1/0	1/1	1/0	1/0	1/0	1/0	1/0	1/0	1/0	1/0	1/0	1/0	1/0	1/0	1/0	1/0
NC_037328.1:148188632-148188758(-)	BosSINEL	49.72	50.28	533	539	5	523	8	0	1/0	1/0	1/0	1/0	1/0	1/0	1/0	1/0	1/0	1/0	1/0	1/0	1/0	1/0	1/0	1/0	1/0	1/0	1/0	1/0	1/0	1/0	1/0	1/0	1/0	1/0	1/0	1/0	1/0	1/0	1/0	1/0	1/0	1/0	1/0	1/0	1/0	1/0	1/0	1/0
NC_037328.1:148421525-148421791(-)	BosSINEL	51.41	48.59	548	518	21	506	6	3	1/0	1/0	1/0	1/0	1/0	1/0	1/0	1/0	1/0	1/0	1/0	1/0	1/0	1/0	1/0	1/0	1/0	1/0	1/0	1/0	1/0	1/0	1/0	1/0	1/0	1/0	1/0	1/0	1/0	1/0	1/0	1/0	1/0	1/0	1/0	1/0	1/0	1/0	1/0	1/0
NC_037328.1:150055450-150055547(+)	BosSINEL	52.29	47.71	549	501	34	481	10	11	1/0	1/0	1/0	1/0	1/0	1/0	1/0	1/0	1/0	1/0	1/0	1/0	1/0	1/0	1/0	1/0	1/0	1/0	1/0	1/0	1/0	1/0	1/0	1/0	1/0	1/0	1/0	1/0	1/0	1/0	1/0	1/0	1/0	1/0	1/0	1/0	1/0	1/0	1/0	1/0
NC_037328.1:152400016-152400283(+)	BosSINEL	48.69	51.31	522	550	0	522	14	0	1/0	1/0	1/0	1/0	1/0	1/0	1/0	1/0	1/0	1/0	1/0	1/0	1/0	1/0	1/0	1/0	1/0	1/0	1/0	1/0	1/0	1/0	1/0	1/0	1/0	1/0	1/0	1/0	1/0	1/0	1/0	1/0	1/0	1/0	1/0	1/0	1/0	1/0	1/0	1/0
NC_037328.1:154920564-154920819(+)	BosSINEL	49.44	50.56	528	540	2	524	8	2	1/0	1/0	1/0	1/0	1/0	1/0	1/0	1/0	1/0	1/0	1/0	1/0	1/0	1/0	1/0	1/0	1/0	1/0	1/0	1/0	1/0	1/0	1/0	1/0	1/0	1/0	1/0	1/0	1/0	1/0	1/0	1/0	1/0	1/0	1/0	1/0	1/0	1/0	1/0	1/0
NC_037328.1:154921225-154921485(+)	BosSINEL	78.65	21.35	829	225	303	223	1	9	1/1	1/1	1/1	1/1	1/1	1/0	1/0	1/1	1/1	1/1	1/1	1/1	1/0	1/1	1/0	1/0	1/0	1/1	1/0	1/1	1/0	1/1	1/0	1/0	1/0	1/1	1/0	1/1	1/0	1/1	1/0	1/0	1/0	1/1	1/1	1/0	1/1	1/1	1/1	1/0
NC_037328.1:155355741-155355811(+)	BosSINEL	49.35	50.65	529	543	0	529	7	0	1/0	1/0	1/0	1/0	1/0	1/0	1/0	1/0	1/0	1/0	1/0	1/0	1/0	1/0	1/0	1/0	1/0	1/0	1/0	1/0	1/0	1/0	1/0	1/0	1/0	1/0	1/0	1/0	1/0	1/0	1/0	1/0	1/0	1/0	1/0	1/0	1/0	1/0	1/0	1/0
NC_037328.1:155661847-155661948(-)	BosSINEL	86.38	13.62	907	143	382	143	0	11	1/1	1/1	1/0	1/1	1/1	1/1	1/1	1/1	1/0	1/0	1/1	1/1	1/0	1/0	1/1	1/0	1/1	1/1	1/0	1/0	1/1	1/1	1/1	1/0	1/0	1/1	1/1	1/0	1/1	1/0	1/1	1/1	1/1	1/1	1/1	1/1	1/1	1/1	1/0	1/0
NC_037328.1:155803694-155803746(+)	BosSINEL	49.91	50.09	533	535	5	523	6	2	1/0	1/0	1/0	1/0	1/0	1/0	1/0	1/0	1/0	1/0	1/0	1/0	1/0	1/0	1/0	1/0	1/0	1/0	1/0	1/0	1/0	1/0	1/0	1/0	1/0	1/0	1/0	1/0	1/0	1/0	1/0	1/0	1/0	1/0	1/0	1/0	1/0	1/0	1/0	1/0
NC_037328.1:158137907-158138170(-)	BosSINEL	58.52	41.48	618	438	101	416	11	8	1/0	1/0	1/0	1/0	1/1	1/0	1/0	1/0	1/0	1/0	1/0	1/0	1/0	1/0	1/0	1/0	1/0	1/0	1/0	1/0	1/0	1/0	1/0	1/0	1/0	1/0	1/0	1/1	1/0	1/0	1/0	1/0	1/0	1/0	1/1	1/0	1/0	1/0	1/0	1/0
NC_037328.1:158146177-158146437(+)	BosSINEL	79.83	20.17	843	213	317	209	2	8	1/1	1/1	1/1	1/1	1/1	1/0	1/0	1/0	1/0	1/0	1/0	1/1	1/0	1/1	1/0	1/0	1/1	1/1	1/0	1/0	1/1	1/0	1/0	1/1	1/0	1/0	1/0	1/1	1/0	1/0	1/0	1/0	1/0	1/0	1/1	1/0	1/0	1/1	1/1	1/0
NC_037337.1:81342-81617(+)	BosSINEL	49.81	50.19	528	532	2	524	4	6	1/0	1/0	1/0	1/0	1/0	1/0	1/0	1/0	1/0	1/0	1/0	1/0	1/0	1/0	1/0	1/0	1/0	1/0	1/0	1/0	1/0	1/0	1/0	1/0	1/0	1/0	1/0	1/0	1/0	1/0	1/0	1/0	1/0	1/0	1/0	1/0	1/0	1/0	1/0	1/0
NC_037337.1:82483-82755(-)	BosSINEL	48.79	51.21	523	549	0	523	13	0	1/0	1/0	1/0	1/0	1/0	1/0	1/0	1/0	1/0	1/0	1/0	1/0	1/0	1/0	1/0	1/0	1/0	1/0	1/0	1/0	1/0	1/0	1/0	1/0	1/0	1/0	1/0	1/0	1/0	1/0	1/0	1/0	1/0	1/0	1/0	1/0	1/0	1/0	1/0	1/0
NC_037337.1:262567-262823(+)	BosSINEL	49.62	50.38	526	534	1	524	5	6	1/0	1/0	1/0	1/0	1/0	1/0	1/0	1/0	1/0	1/0	1/0	1/0	1/0	1/0	1/0	1/0	1/0	1/0	1/0	1/0	1/0	1/0	1/0	1/0	1/0	1/0	1/0	1/0	1/0	1/0	1/0	1/0	1/0	1/0	1/0	1/0	1/0	1/0	1/0	1/0
NC_037337.1:287894-288162(-)	BosSINEL	48.3	51.7	512	548	1	510	19	6	1/0	1/0	1/0	1/0	1/0	1/0	1/0	1/0	1/0	1/0	1/0	1/0	1/0	1/0	1/0	1/0	1/0	1/0	1/0	1/0	1/0	1/0	1/0	1/0	1/0	1/0	1/0	1/0	1/0	1/0	1/0	1/0	1/0	1/0	1/0	1/0	1/0	1/0	1/0	1/0
NC_037337.1:333278-333398(-)	BosSINEL	49.53	50.47	525	535	0	525	5	6	1/0	1/0	1/0	1/0	1/0	1/0	1/0	1/0	1/0	1/0	1/0	1/0	1/0	1/0	1/0	1/0	1/0	1/0	1/0	1/0	1/0	1/0	1/0	1/0	1/0	1/0	1/0	1/0	1/0	1/0	1/0	1/0	1/0	1/0	1/0	1/0	1/0	1/0	1/0	1/0
NC_037337.1:354205-354472(+)	BosSINEL	66	34	693	357	171	351	3	11	1/1	1/0	1/0	1/0	1/0	1/0	1/0	1/0	1/0	1/0	1/0	1/1	1/1	1/0	1/1	1/0	1/0	1/0	1/1	1/1	1/1	1/1	1/0	1/0	1/0	1/1	1/0	1/1	1/0	1/0	1/0	1/0	1/0	1/1	1/0	1/1	1/1	1/0	1/1	1/0
NC_037337.1:418342-418606(-)	BosSINEL	48.88	51.12	522	546	0	522	12	2	1/0	1/0	1/0	1/0	1/0	1/0	1/0	1/0	1/0	1/0	1/0	1/0	1/0	1/0	1/0	1/0	1/0	1/0	1/0	1/0	1/0	1/0	1/0	1/0	1/0	1/0	1/0	1/0	1/0	1/0	1/0	1/0	1/0	1/0	1/0	1/0	1/0	1/0	1/0	1/0
NC_037337.1:496720-496992(-)	BosSINEL	48.69	51.31	522	550	0	522	14	0	1/0	1/0	1/0	1/0	1/0	1/0	1/0	1/0	1/0	1/0	1/0	1/0	1/0	1/0	1/0	1/0	1/0	1/0	1/0	1/0	1/0	1/0	1/0	1/0	1/0	1/0	1/0	1/0	1/0	1/0	1/0	1/0	1/0	1/0	1/0	1/0	1/0	1/0	1/0	1/0
NC_037337.1:1482948-1483225(-)	BosSINEL	74.48	25.52	788	270	259	270	0	7	1/0	1/1	1/0	1/1	1/1	1/1	1/1	1/0	1/1	1/1	1/1	1/0	1/1	1/0	1/1	1/1	1/1	1/0	1/1	1/0	1/0	1/1	1/1	1/0	1/0	1/0	1/0	1/0	1/0	1/0	1/1	1/1	1/1	1/1	1/1	1/1	1/1	1/1	1/1	1/1
NC_037337.1:1639125-1639255(-)	BosSINEL	48.69	51.31	522	550	0	522	14	0	1/0	1/0	1/0	1/0	1/0	1/0	1/0	1/0	1/0	1/0	1/0	1/0	1/0	1/0	1/0	1/0	1/0	1/0	1/0	1/0	1/0	1/0	1/0	1/0	1/0	1/0	1/0	1/0	1/0	1/0	1/0	1/0	1/0	1/0	1/0	1/0	1/0	1/0	1/0	1/0
NC_037337.1:1996599-1996861(+)	BosSINEL	54.07	45.93	571	485	50	471	7	8	1/0	1/0	1/0	1/0	1/0	1/0	1/0	1/0	1/0	1/1	1/0	1/0	1/0	1/0	1/0	1/0	1/0	1/1	1/0	1/0	1/0	1/0	1/0	1/0	1/0	1/0	1/0	1/0	1/0	1/0	1/0	1/0	1/0	1/0	1/0	1/0	1/0	1/0	1/0	1/0
NC_037337.1:2913654-2913916(+)	BosSINEL	60.17	39.83	639	423	112	415	4	5	1/0	1/0	1/0	1/0	1/0	1/0	1/1	1/0	1/0	1/0	1/0	1/0	1/0	1/0	1/0	1/0	1/1	1/0	1/0	1/0	1/0	1/0	1/0	1/0	1/0	1/0	1/0	1/0	1/0	1/0	1/0	1/0	1/0	1/0	1/0	1/0	1/0	1/0	1/0	1/0
NC_037337.1:3484663-3484758(+)	BosSINEL	47.94	52.06	511	555	1	509	23	3	1/0	1/0	1/0	1/0	1/0	1/0	1/0	1/0	1/0	1/0	1/0	1/0	1/0	1/0	1/0	1/0	1/0	1/0	1/0	1/0	1/0	1/0	1/0	1/0	1/0	1/0	1/0	1/0	1/0	1/0	1/0	1/0	1/0	1/0	1/0	1/0	1/0	1/0	1/0	1/0
NC_037337.1:3848385-3848646(+)	BosSINEL	48.6	51.4	519	549	0	519	15	2	1/0	1/0	1/0	1/0	1/0	1/0	1/0	1/0	1/0	1/0	1/0	1/0	1/0	1/0	1/0	1/0	1/0	1/0	1/0	1/0	1/0	1/0	1/0	1/0	1/0	1/0	1/0	1/0	1/0	1/0	1/0	1/0	1/0	1/0	1/0	1/0	1/0	1/0	1/0	1/0
NC_037337.1:4011720-4011968(-)	BosSINEL	53.4	46.6	565	493	44	477	8	7	1/0	1/0	1/0	1/0	1/0	1/0	1/0	1/0	1/0	1/0	1/0	1/0	1/0	1/0	1/0	1/0	1/0	1/0	1/0	1/0	1/0	1/0	1/0	1/0	1/0	1/0	1/0	1/0	1/0	1/0	1/0	1/0	1/0	1/0	1/0	1/0	1/0	1/0	1/0	1/0
NC_037337.1:4411141-4411416(+)	BosSINEL	53.49	46.51	567	493	47	473	10	6	1/0	1/0	1/0	1/0	1/0	1/0	1/0	1/0	1/0	1/0	1/0	1/0	1/0	1/0	1/0	1/0	1/0	1/0	1/0	1/0	1/0	1/0	1/0	1/0	1/0	1/0	1/0	1/0	1/0	1/0	1/0	1/0	1/0	1/0	1/0	1/0	1/0	1/0	1/0	1/0
NC_037337.1:4418746-4418865(-)	BosSINEL	58.49	41.51	620	440	91	438	1	6	1/0	1/0	1/0	1/0	1/0	1/0	1/0	1/0	1/0	1/0	1/0	1/1	1/0	1/0	1/0	1/0	1/0	1/0	1/0	1/0	1/0	1/0	1/0	1/0	1/0	1/0	1/0	1/0	1/0	1/0	1/0	1/0	1/0	1/0	1/0	1/0	1/1	1/0	1/0	1/0
NC_037337.1:4479832-4480102(-)	BosSINEL	52.46	47.54	555	503	38	479	12	7	1/0	1/0	1/0	1/0	1/0	1/0	1/0	1/0	1/0	1/1	1/0	1/0	1/0	1/0	1/0	1/0	1/0	1/0	1/0	1/0	1/1	1/0	1/0	1/0	1/0	1/0	1/0	1/0	1/0	1/0	1/0	1/0	1/0	1/0	1/0	1/0	1/1	1/0	1/0	1/0
NC_037337.1:4693551-4693808(-)	BosSINEL	49.91	50.09	533	535	7	519	8	2	1/0	1/0	1/0	1/0	1/0	1/0	1/0	1/0	1/0	1/0	1/0	1/0	1/0	1/0	1/0	1/0	1/0	1/0	1/0	1/0	1/0	1/0	1/0	1/0	1/0	1/0	1/0	1/0	1/0	1/0	1/0	1/0	1/0	1/0	1/0	1/0	1/0	1/0	1/0	1/0
NC_037337.1:4983733-4983983(-)	BosSINEL	55.31	44.69	583	471	68	447	12	9	1/0	1/0	1/0	1/0	1/1	1/0	1/1	1/0	1/1	1/0	1/0	1/0	1/0	1/0	1/0	1/0	1/0	1/0	1/0	1/0	1/0	1/0	1/0	1/0	1/0	1/0	1/0	1/0	1/0	1/0	1/0	1/0	1/0	1/0	1/0	1/0	1/0	1/0	1/0	1/0
NC_037337.1:5192543-5192808(-)	BosSINEL	78.42	21.58	825	227	300	225	1	10	1/1	1/0	1/0	1/0	1/1	1/1	1/1	1/1	1/1	1/1	1/1	1/1	1/1	1/1	1/1	1/1	1/1	1/1	1/1	1/1	1/0	1/0	1/1	1/1	1/1	1/1	1/1	1/1	1/1	1/0	1/1	1/1	1/1	1/1	1/1	1/1	1/1	1/1	1/0	1/1
NC_037337.1:6128016-6128289(+)	BosSINEL	49.62	50.38	528	536	2	524	6	4	1/0	1/0	1/0	1/0	1/0	1/0	1/0	1/0	1/0	1/0	1/0	1/0	1/0	1/0	1/0	1/0	1/0	1/0	1/0	1/0	1/0	1/0	1/0	1/0	1/0	1/0	1/0	1/0	1/0	1/0	1/0	1/0	1/0	1/0	1/0	1/0	1/0	1/0	1/0	1/0
NC_037337.1:6908972-6909247(+)	BosSINEL	49.06	50.94	524	544	1	522	11	2	1/0	1/0	1/0	1/0	1/0	1/0	1/0	1/0	1/0	1/0	1/0	1/0	1/0	1/0	1/0	1/0	1/0	1/0	1/0	1/0	1/0	1/0	1/0	1/0	1/0	1/0	1/0	1/0	1/0	1/0	1/0	1/0	1/0	1/0	1/0	1/0	1/0	1/0	1/0	1/0
NC_037337.1:6949674-6949722(+)	BosSINEL	49.06	50.94	524	544	0	524	10	2	1/0	1/0	1/0	1/0	1/0	1/0	1/0	1/0	1/0	1/0	1/0	1/0	1/0	1/0	1/0	1/0	1/0	1/0	1/0	1/0	1/0	1/0	1/0	1/0	1/0	1/0	1/0	1/0	1/0	1/0	1/0	1/0	1/0	1/0	1/0	1/0	1/0	1/0	1/0	1/0
NC_037337.1:7049247-7049523(-)	BosSINEL	49.34	50.66	522	536	0	522	7	7	1/0	1/0	1/0	1/0	1/0	1/0	1/0	1/0	1/0	1/0	1/0	1/0	1/0	1/0	1/0	1/0	1/0	1/0	1/0	1/0	1/0	1/0	1/0	1/0	1/0	1/0	1/0	1/0	1/0	1/0	1/0	1/0	1/0	1/0	1/0	1/0	1/0	1/0	1/0	1/0
NC_037337.1:7407711-7408131(+)	BosSINEL	48.23	51.77	517	555	0	517	19	0	1/0	1/0	1/0	1/0	1/0	1/0	1/0	1/0	1/0	1/0	1/0	1/0	1/0	1/0	1/0	1/0	1/0	1/0	1/0	1/0	1/0	1/0	1/0	1/0	1/0	1/0	1/0	1/0	1/0	1/0	1/0	1/0	1/0	1/0	1/0	1/0	1/0	1/0	1/0	1/0
NC_037337.1:8245925-8246200(-)	BosSINEL	88.61	11.39	934	120	407	120	0	9	1/1	1/1	1/0	1/1	1/0	1/1	1/1	1/1	1/1	1/0	1/0	1/1	1/1	1/0	1/1	1/1	1/1	1/1	1/1	1/1	1/1	1/1	1/1	1/1	1/1	1/1	1/0	1/0	1/1	1/0	1/0	1/1	1/1	1/1	1/1	1/1	1/0	1/1	1/0	1/0
NC_037337.1:8294921-8295195(+)	BosSINEL	84.63	15.37	892	162	365	162	0	9	1/0	1/0	1/1	1/1	1/1	1/1	1/1	1/1	1/1	1/1	1/1	1/1	1/0	1/1	1/1	1/1	1/1	1/0	1/1	1/1	1/0	1/1	1/1	1/1	1/1	1/1	1/1	1/1	1/0	1/1	1/1	1/0	1/1	1/1	1/0	1/1	1/1	1/1	1/1	1/1
NC_037337.1:9168944-9169207(-)	BosSINEL	49.25	50.75	526	542	3	520	11	2	1/0	1/0	1/0	1/0	1/0	1/0	1/0	1/0	1/0	1/0	1/0	1/0	1/0	1/0	1/0	1/0	1/0	1/0	1/0	1/0	1/0	1/0	1/0	1/0	1/0	1/0	1/0	1/0	1/0	1/0	1/0	1/0	1/0	1/0	1/0	1/0	1/0	1/0	1/0	1/0
NC_037337.1:9463796-9464071(-)	BosSINEL	83.02	16.98	875	179	351	173	3	9	1/1	1/1	1/1	1/1	1/1	1/1	1/0	1/0	1/1	1/0	1/0	1/0	1/1	1/0	1/0	1/0	1/0	1/0	1/1	1/0	1/0	1/1	1/0	1/0	1/0	1/0	1/1	1/0	1/0	1/0	1/0	1/0	1/0	1/1	1/1	1/0	1/0	1/0	1/0	1/0
NC_037337.1:9926487-9926763(+)	BosSINEL	48.69	51.31	520	548	0	520	14	2	1/0	1/0	1/0	1/0	1/0	1/0	1/0	1/0	1/0	1/0	1/0	1/0	1/0	1/0	1/0	1/0	1/0	1/0	1/0	1/0	1/0	1/0	1/0	1/0	1/0	1/0	1/0	1/0	1/0	1/0	1/0	1/0	1/0	1/0	1/0	1/0	1/0	1/0	1/0	1/0
NC_037337.1:9994674-9994947(+)	BosSINEL	49.72	50.28	531	537	1	529	4	2	1/0	1/0	1/0	1/0	1/0	1/0	1/0	1/0	1/0	1/0	1/0	1/0	1/0	1/0	1/0	1/0	1/0	1/0	1/0	1/0	1/0	1/0	1/0	1/0	1/0	1/0	1/0	1/0	1/0	1/0	1/0	1/0	1/0	1/0	1/0	1/0	1/0	1/0	1/0	1/0
NC_037337.1:10174405-10174680(+)	BosSINEL	50.19	49.81	532	528	5	522	3	6	1/0	1/0	1/0	1/0	1/0	1/0	1/0	1/0	1/0	1/0	1/0	1/0	1/0	1/0	1/0	1/0	1/0	1/0	1/0	1/0	1/0	1/0	1/0	1/0	1/0	1/0	1/0	1/0	1/0	1/0	1/0	1/0	1/0	1/0	1/0	1/0	1/0	1/0	1/0	1/0
NC_037337.1:10570926-10571202(+)	BosSINEL	49.72	50.28	525	531	10	505	13	8	1/0	1/0	1/0	1/0	1/0	1/0	1/0	1/0	1/0	1/0	1/0	1/0	1/0	1/0	1/0	1/0	1/0	1/0	1/0	1/0	1/0	1/0	1/0	1/0	1/0	1/0	1/0	1/0	1/0	1/0	1/0	1/0	1/0	1/0	1/0	1/0	1/0	1/0	1/0	1/0
NC_037337.1:10873864-10874138(-)	BosSINEL	48.51	51.49	520	552	0	520	16	0	1/0	1/0	1/0	1/0	1/0	1/0	1/0	1/0	1/0	1/0	1/0	1/0	1/0	1/0	1/0	1/0	1/0	0/0	1/0	1/0	1/0	1/0	1/0	1/0	1/0	1/0	1/0	1/0	1/0	1/0	1/0	1/0	1/0	1/0	1/0	1/0	1/0	1/0	1/0	1/0
NC_037337.1:11266107-11266237(+)	BosSINEL	49.53	50.47	528	538	0	528	5	3	1/0	1/0	1/0	1/0	1/0	1/0	1/0	1/0	1/0	1/0	1/0	1/0	1/0	1/0	1/0	1/0	1/0	1/0	1/0	1/0	1/0	1/0	1/0	1/0	1/0	1/0	1/0	1/0	1/0	1/0	1/0	1/0	1/0	1/0	1/0	1/0	1/0	1/0	1/0	1/0
NC_037337.1:11338969-11339234(+)	BosSINEL	51.8	48.2	548	510	29	490	10	7	1/0	1/0	1/0	1/0	1/0	1/0	1/0	1/0	1/0	1/0	1/0	1/0	1/0	1/0	1/0	1/0	1/0	1/0	1/0	1/0	1/0	1/0	1/0	1/0	1/0	1/0	1/0	1/0	1/0	1/0	1/0	1/0	1/0	1/0	1/0	1/0	1/0	1/0	1/0	1/0
NC_037337.1:11682005-11682134(-)	BosSINEL	58.22	41.78	616	442	92	432	5	7	1/1	1/0	1/0	1/0	1/0	1/0	1/0	1/0	1/0	1/0	1/1	1/0	1/0	1/1	1/0	1/0	1/0	1/0	1/0	1/0	1/0	1/0	1/0	1/0	1/0	1/0	1/0	1/0	1/0	1/0	1/0	1/0	1/0	1/0	1/0	1/0	1/0	1/0	1/0	1/0
NC_037337.1:11858937-11858992(-)	BosSINEL	49.34	50.66	523	537	0	523	7	6	1/0	1/0	1/0	1/0	1/0	1/0	1/0	1/0	1/0	1/0	1/0	1/0	1/0	1/0	1/0	1/0	1/0	1/0	1/0	1/0	1/0	1/0	1/0	1/0	1/0	1/0	1/0	1/0	1/0	1/0	1/0	1/0	1/0	1/0	1/0	1/0	1/0	1/0	1/0	1/0
NC_037337.1:12455761-12456026(+)	BosSINEL	50.75	49.25	538	522	20	498	12	6	1/0	1/0	1/0	1/0	1/0	1/0	1/0	1/0	1/0	1/0	1/0	1/0	1/0	1/0	1/0	1/0	1/0	1/0	1/0	1/0	1/0	1/0	1/0	1/0	1/0	1/0	1/0	1/0	1/0	1/0	1/0	1/0	1/0	1/0	1/0	1/0	1/0	1/0	1/0	1/0
NC_037337.1:12731490-12731763(-)	BosSINEL	51.42	48.58	543	513	18	507	3	8	1/0	1/0	1/0	1/0	1/0	1/0	1/0	1/1	1/0	1/0	1/0	1/0	1/0	1/0	1/0	1/0	1/0	1/0	1/0	1/0	1/0	1/0	1/0	1/0	1/0	1/0	1/0	1/0	1/0	1/0	1/0	1/0	1/0	1/0	1/0	1/0	1/0	1/0	1/0	1/0
NC_037337.1:12823340-12823389(-)	BosSINEL	31.71	68.29	333	717	59	215	251	11	1/0	1/0	1/0	1/1	1/0	1/0	1/0	0/0	1/0	1/0	1/0	1/0	0/0	1/0	1/0	1/1	0/0	0/0	1/1	1/0	0/0	0/0	0/0	0/0	1/1	1/0	1/0	1/0	1/0	0/0	1/1	1/1	1/0	0/0	1/0	0/0	1/0	0/0	1/0	1/0
NC_037337.1:13813410-13813686(+)	BosSINEL	50.66	49.34	536	522	16	504	9	7	1/0	1/0	1/0	1/0	1/0	1/0	1/0	1/0	1/0	1/0	1/0	1/0	1/0	1/0	1/0	1/0	1/0	1/0	1/0	1/0	1/0	1/0	1/0	1/0	1/0	1/0	1/0	1/0	1/0	1/0	1/0	1/0	1/0	1/0	1/0	1/0	1/0	1/0	1/0	1/0
NC_037337.1:14813183-14813454(-)	BosSINEL	48.69	51.31	520	548	1	518	15	2	1/0	1/0	1/0	1/0	1/0	1/0	1/0	1/0	1/0	1/0	1/0	1/0	1/0	1/0	1/0	1/0	1/0	1/0	1/0	1/0	1/0	1/0	1/0	1/0	1/0	1/0	1/0	1/0	1/0	1/0	1/0	1/0	1/0	1/0	1/0	1/0	1/0	1/0	1/0	1/0
NC_037337.1:15694460-15694732(+)	BosSINEL	62.64	37.36	664	396	134	396	0	6	1/0	1/0	1/0	1/0	1/0	1/1	1/0	1/0	1/0	1/0	1/0	1/0	1/0	1/0	1/0	1/0	1/0	1/0	1/0	1/0	1/0	1/0	1/1	1/1	1/0	1/0	1/1	1/0	1/0	1/0	1/1	1/0	1/0	1/0	1/0	1/1	1/0	1/0	1/0	1/0
NC_037337.1:15776005-15776138(+)	BosSINEL	65.72	34.28	694	362	167	360	1	8	1/0	1/0	1/0	1/0	1/0	1/0	1/0	1/0	1/0	1/0	1/0	1/0	1/0	1/1	1/0	1/0	1/0	1/0	1/0	1/1	1/0	1/0	1/0	1/0	1/0	1/1	1/0	1/1	1/0	1/0	1/0	1/0	1/1	1/1	1/0	1/0	1/0	1/0	1/0	1/0
NC_037337.1:15815182-15815310(-)	BosSINEL	49.07	50.93	525	545	0	525	10	1	1/0	1/0	1/0	1/0	1/0	1/0	1/0	1/0	1/0	1/0	1/0	1/0	1/0	1/0	1/0	1/0	1/0	1/0	1/0	1/0	1/0	1/0	1/0	1/0	1/0	1/0	1/0	1/0	1/0	1/0	1/0	1/0	1/0	1/0	1/0	1/0	1/0	1/0	1/0	1/0
NC_037337.1:16052136-16052269(-)	BosSINEL	50	50	532	532	8	516	8	4	1/0	1/0	1/0	1/0	1/0	1/0	1/0	1/0	1/0	1/0	1/0	1/0	1/0	1/0	1/0	1/0	1/0	1/0	1/0	1/0	1/0	1/0	1/0	1/0	1/0	1/0	1/0	1/0	1/0	1/0	1/0	1/0	1/0	1/0	1/0	1/0	1/0	1/0	1/0	1/0
NC_037337.1:16234131-16234407(-)	BosSINEL	74.9	25.1	788	264	269	250	7	10	1/1	1/1	1/1	1/1	1/1	1/0	1/0	1/1	1/0	1/0	1/0	1/0	1/0	1/0	1/0	1/0	1/1	1/0	1/0	1/0	1/0	1/1	1/1	1/1	1/0	1/0	1/0	1/0	1/0	1/1	1/0	1/1	1/0	1/0	1/1	1/0	1/0	1/1	1/0	1/1
NC_037337.1:16310100-16310231(+)	BosSINEL	49.81	50.19	528	532	5	518	7	6	1/0	1/0	1/0	1/0	1/0	1/0	1/0	1/0	1/0	1/0	1/0	1/0	1/0	1/0	1/0	1/0	1/0	1/0	1/0	1/0	1/0	1/0	1/0	1/0	1/0	1/0	1/0	1/0	1/0	1/0	1/0	1/0	1/0	1/0	1/0	1/0	1/0	1/0	1/0	1/0
NC_037337.1:17286565-17286840(+)	BosSINEL	86.56	13.44	895	139	378	139	0	19	1/0	1/0	1/0	1/0	1/1	1/1	1/1	1/0	1/1	1/1	1/1	1/1	1/1	1/1	1/1	1/1	1/1	1/1	1/1	1/1	1/1	1/1	1/1	1/1	1/1	1/1	1/1	1/1	1/0	1/1	1/1	1/1	1/1	1/1	1/1	1/1	1/0	1/0	1/1	1/1
NC_037337.1:17365866-17366142(-)	BosSINEL	56.1	43.9	589	461	70	449	6	11	1/1	1/1	1/0	1/1	1/0	1/0	1/0	1/0	1/0	1/0	1/1	1/0	1/0	1/0	1/0	1/0	1/0	1/0	1/0	1/0	1/0	1/0	1/0	1/0	1/0	1/0	1/0	1/0	1/0	1/0	1/0	1/0	1/0	1/0	1/0	1/0	1/0	1/0	1/0	1/0
NC_037337.1:17520235-17520491(+)	BosSINEL	82.31	17.69	861	185	339	183	1	13	1/0	1/1	1/1	1/1	1/0	1/1	1/1	1/1	1/1	1/1	1/1	1/0	1/0	1/1	1/1	1/1	1/1	1/0	1/0	1/1	1/0	1/1	1/1	1/1	1/1	1/1	1/1	1/0	1/1	1/1	1/1	1/1	1/0	1/1	1/1	1/1	1/1	1/1	1/1	1/0
NC_037337.1:18384711-18384977(+)	BosSINEL	48.78	51.22	521	547	0	521	13	2	1/0	1/0	1/0	1/0	1/0	1/0	1/0	1/0	1/0	1/0	1/0	1/0	1/0	1/0	1/0	1/0	1/0	1/0	1/0	1/0	1/0	1/0	1/0	1/0	1/0	1/0	1/0	1/0	1/0	1/0	1/0	1/0	1/0	1/0	1/0	1/0	1/0	1/0	1/0	1/0
NC_037337.1:19697836-19697971(+)	BosSINEL	48.23	51.77	517	555	0	517	19	0	1/0	1/0	1/0	1/0	1/0	1/0	1/0	1/0	1/0	1/0	1/0	1/0	1/0	1/0	1/0	1/0	1/0	1/0	1/0	1/0	1/0	1/0	1/0	1/0	1/0	1/0	1/0	1/0	1/0	1/0	1/0	1/0	1/0	1/0	1/0	1/0	1/0	1/0	1/0	1/0
NC_037337.1:19742387-19742613(-)	BosSINEL	49.53	50.47	528	538	1	526	6	3	1/0	1/0	1/0	1/0	1/0	1/0	1/0	1/0	1/0	1/0	1/0	1/0	1/0	1/0	1/0	1/0	1/0	1/0	1/0	1/0	1/0	1/0	1/0	1/0	1/0	1/0	1/0	1/0	1/0	1/0	1/0	1/0	1/0	1/0	1/0	1/0	1/0	1/0	1/0	1/0
NC_037337.1:20339682-20339956(-)	BosSINEL	70.21	29.79	740	314	215	310	2	9	1/0	1/0	1/0	1/0	1/1	1/0	1/0	1/0	1/1	1/1	1/1	1/1	1/0	1/1	1/0	1/0	1/0	1/1	1/1	1/0	1/0	1/1	1/0	1/1	1/1	1/0	1/1	1/1	1/1	1/0	1/0	1/0	1/1	1/0	1/1	1/1	1/0	1/1	0/0	1/0
NC_037337.1:20679667-20679798(-)	BosSINEL	74.28	25.72	771	267	253	265	1	17	1/1	1/0	1/0	1/1	1/1	1/1	1/1	1/1	1/0	1/1	1/1	1/1	1/1	1/1	1/1	1/1	1/1	1/0	1/1	1/1	1/0	1/1	1/0	1/0	1/1	1/1	1/1	1/1	1/0	1/1	1/0	1/1	1/1	1/0	1/0	1/0	1/1	1/0	1/1	1/1
NC_037337.1:21355346-21355616(-)	BosSINEL	50.75	49.25	543	527	16	511	8	1	1/0	1/0	1/0	1/0	1/0	1/0	1/0	1/0	1/0	1/0	1/0	1/0	1/0	1/0	1/0	1/0	1/0	1/0	1/0	1/0	1/0	1/0	1/0	1/0	1/0	1/0	1/0	1/0	1/0	1/0	1/0	1/0	1/0	1/0	1/0	1/0	1/0	1/0	1/0	1/0
NC_037337.1:22662502-22662777(+)	BosSINEL	49.62	50.38	526	534	3	520	7	6	1/0	1/0	1/0	1/0	1/0	1/0	1/0	1/0	1/0	1/0	1/0	1/0	1/0	1/0	1/0	1/0	1/0	1/0	1/0	1/0	1/0	1/0	1/0	1/0	1/0	1/0	1/0	1/0	1/0	1/0	1/0	1/0	1/0	1/0	1/0	1/0	1/0	1/0	1/0	1/0
NC_037337.1:22765133-22765338(-)	BosSINEL	46.36	53.64	496	574	0	496	39	1	1/0	1/0	1/0	1/0	1/0	1/0	1/0	1/0	1/0	1/0	1/0	1/0	1/0	1/0	1/0	1/0	1/0	1/0	1/0	1/0	1/0	1/0	1/0	1/0	1/0	1/0	0/0	1/0	1/0	1/0	1/0	1/0	1/0	1/0	1/0	1/0	1/0	1/0	1/0	1/0
NC_037337.1:22884959-22885234(-)	BosSINEL	47.26	52.74	501	559	1	499	30	6	1/0	1/0	1/0	1/0	1/0	1/0	1/0	1/0	1/0	1/0	1/0	1/0	1/0	1/0	1/0	1/0	1/0	1/0	1/0	1/0	1/0	1/0	1/0	1/0	1/0	1/0	1/0	1/0	1/0	1/0	1/0	1/0	1/0	1/0	1/0	1/0	1/0	1/0	1/0	1/0
NC_037337.1:22981500-22981775(+)	BosSINEL	34.15	65.85	362	698	0	362	168	6	1/0	1/0	1/0	0/0	1/0	1/0	1/0	1/0	1/0	0/0	0/0	0/0	1/0	1/0	1/0	0/0	0/0	1/0	0/0	1/0	1/0	1/0	0/0	1/0	0/0	1/0	1/0	1/0	0/0	1/0	1/0	1/0	1/0	0/0	1/0	0/0	0/0	0/0	1/0	1/0
NC_037337.1:23107173-23107448(-)	BosSINEL	13.71	86.29	145	913	1	143	385	7	0/0	0/0	0/0	0/0	0/0	0/0	0/0	0/0	1/0	1/0	1/0	0/0	1/0	0/0	0/0	0/0	1/0	0/0	0/0	0/0	1/0	0/0	1/0	0/0	0/0	0/0	1/0	0/0	0/0	0/0	0/0	0/0	0/0	0/0	0/0	0/0	1/0	0/0	0/0	0/0
NC_037337.1:23286878-23287114(-)	BosSINEL	72.03	27.97	739	287	246	247	20	23	1/0	1/0	1/0	1/0	1/1	1/0	1/0	0/0	1/1	1/1	1/1	1/0	1/0	1/1	1/0	1/1	1/1	1/1	1/0	1/1	1/1	1/1	1/1	1/0	1/1	1/0	1/0	1/1	1/0	1/1	1/0	1/1	1/1	1/1	1/1	1/0	1/1	1/0	1/0	1/1
NC_037337.1:23397330-23397598(-)	BosSINEL	68.44	31.56	709	327	196	317	5	18	1/0	1/0	1/0	1/1	1/0	1/0	1/0	1/1	1/0	1/1	1/1	1/1	1/0	1/1	1/0	1/1	1/1	1/0	1/1	1/1	1/0	1/1	1/1	1/0	1/1	1/0	1/0	1/0	1/1	1/1	1/0	1/0	1/0	1/1	1/0	1/1	1/1	1/1	1/0	1/0
NC_037337.1:23419047-23419323(-)	BosSINEL	58.22	41.78	616	442	91	434	4	7	1/0	1/0	1/0	1/1	1/1	1/0	1/0	1/0	1/0	1/1	1/1	1/0	1/0	1/0	1/0	1/1	1/0	1/0	1/1	1/0	1/1	1/0	1/1	1/0	1/1	1/0	1/0	1/0	1/0	1/0	1/0	1/0	1/0	1/0	1/0	1/0	1/1	1/0	1/0	1/0
NC_037337.1:23691022-23691294(-)	BosSINEL	49.06	50.94	520	540	0	520	10	6	1/0	1/0	1/0	1/0	1/0	1/0	1/0	1/0	1/0	1/0	1/0	1/0	1/0	1/0	1/0	1/0	1/0	0/0	1/0	1/0	1/0	1/0	1/0	1/0	1/0	1/0	1/0	1/0	1/0	1/0	1/0	1/0	1/0	1/0	1/0	1/0	1/0	1/0	1/0	1/0
NC_037337.1:23693390-23693662(+)	BosSINEL	45.85	54.15	486	574	0	486	44	6	1/0	1/0	1/0	1/0	1/0	1/0	1/0	1/0	1/0	1/0	1/0	1/0	1/0	1/0	1/0	1/0	1/0	1/0	1/0	1/0	1/0	1/0	1/0	1/0	1/0	1/0	1/0	1/0	1/0	1/0	1/0	1/0	1/0	1/0	1/0	1/0	1/0	1/0	1/0	1/0
NC_037337.1:23722512-23722749(+)	BosSINEL	50	50	530	530	0	530	0	6	1/0	1/0	1/0	1/0	1/0	1/0	1/0	1/0	1/0	1/0	1/0	1/0	1/0	1/0	1/0	1/0	1/0	1/0	1/0	1/0	1/0	1/0	1/0	1/0	1/0	1/0	1/0	1/0	1/0	1/0	1/0	1/0	1/0	1/0	1/0	1/0	1/0	1/0	1/0	1/0
NC_037337.1:24844881-24845157(-)	BosSINEL	48.49	51.51	514	546	0	514	16	6	1/0	1/0	1/0	1/0	1/0	1/0	1/0	1/0	1/0	1/0	1/0	1/0	1/0	1/0	1/0	1/0	1/0	1/0	1/0	1/0	1/0	1/0	1/0	1/0	1/0	1/0	1/0	1/0	1/0	1/0	1/0	1/0	1/0	1/0	1/0	1/0	1/0	1/0	1/0	1/0
NC_037337.1:24915321-24915462(+)	BosSINEL	67.65	32.35	713	341	190	333	4	9	1/1	1/0	1/0	1/1	1/1	1/0	1/0	1/0	1/0	1/0	1/0	1/1	1/0	1/1	1/0	1/0	1/0	1/1	1/0	1/0	1/0	1/0	1/0	1/0	1/1	1/0	1/0	1/0	1/0	1/0	1/1	1/1	1/0	1/0	1/0	1/0	1/0	1/0	1/0	1/0
NC_037337.1:24954681-24954937(-)	BosSINEL	52.46	47.54	555	503	27	501	1	7	1/0	1/0	1/0	1/0	1/1	1/0	1/0	1/1	1/0	1/0	1/0	1/0	1/0	1/0	1/0	1/0	1/0	1/0	1/0	1/0	1/0	1/0	1/0	1/0	1/0	1/0	1/0	1/0	1/0	1/0	1/0	1/1	1/0	1/0	1/0	1/0	1/0	1/0	1/0	1/0
NC_037337.1:24992633-24992873(+)	BosSINEL	87.02	12.98	865	129	375	115	7	39	1/0	1/1	1/0	1/0	1/0	1/1	1/0	NA	1/1	1/1	1/1	1/0	1/1	1/1	1/1	1/0	1/1	1/1	1/0	1/0	1/1	1/0	1/1	1/0	1/0	1/1	1/1	1/1	1/1	1/1	1/1	1/0	1/1	1/0	1/1	1/1	1/1	1/1	1/0	1/1
NC_037337.1:25217964-25218234(+)	BosSINEL	75.19	24.81	779	257	275	229	14	18	1/1	1/1	1/1	1/1	1/1	1/0	1/0	1/0	1/0	1/0	1/0	1/0	1/0	1/0	1/1	1/1	1/0	1/0	1/0	1/0	1/0	1/0	1/0	1/0	1/0	1/1	1/1	1/0	1/0	1/0	1/0	1/0	1/0	1/0	1/0	1/1	1/0	1/0	1/0	1/0
NC_037337.1:25231195-25231469(+)	BosSINEL	49.81	50.19	528	532	5	518	7	6	1/0	1/0	1/0	1/0	1/0	1/0	1/0	1/0	1/0	1/0	1/0	1/0	1/0	1/0	1/0	1/0	1/0	1/0	1/0	1/0	1/0	1/0	1/0	1/0	1/0	1/0	1/0	1/0	1/0	1/0	1/0	1/0	1/0	1/0	1/0	1/0	1/0	1/0	1/0	1/0
NC_037337.1:25249847-25250123(-)	BosSINEL	66.67	33.33	704	352	178	348	2	8	1/0	1/1	1/0	1/0	1/0	1/0	1/1	1/0	1/1	1/0	1/0	1/0	1/0	1/0	1/0	1/0	1/0	1/0	1/0	1/0	1/0	1/0	1/0	1/0	1/0	1/0	1/0	1/0	1/0	1/1	1/0	1/0	1/0	1/0	1/1	1/1	1/0	1/0	1/0	1/1
NC_037337.1:25412486-25412742(+)	BosSINEL	49.05	50.95	519	539	2	515	12	7	1/0	1/0	1/0	1/0	1/0	1/0	1/0	1/0	1/0	1/0	1/0	1/0	1/0	1/0	1/0	1/0	1/0	1/0	1/0	1/0	1/0	1/0	1/0	1/0	1/0	1/0	1/0	1/0	1/0	1/0	1/0	1/0	1/0	1/0	1/0	1/0	1/0	1/0	1/0	1/0
NC_037337.1:25453135-25453410(-)	BosSINEL	49.34	50.66	523	537	0	523	7	6	1/0	1/0	1/0	1/0	1/0	1/0	1/0	1/0	1/0	1/0	1/0	1/0	1/0	1/0	1/0	1/0	1/0	1/0	1/0	1/0	1/0	1/0	1/0	1/0	1/0	1/0	1/0	1/0	1/0	1/0	1/0	1/0	1/0	1/0	1/0	1/0	1/0	1/0	1/0	1/0
NC_037337.1:26104413-26104654(+)	BosSINEL	49.34	50.66	523	537	1	521	8	6	1/0	1/0	1/0	1/0	1/0	1/0	1/0	1/0	1/0	1/0	1/0	1/0	1/0	1/0	1/0	1/0	1/0	1/0	1/0	1/0	1/0	1/0	1/0	1/0	1/0	1/0	1/0	1/0	1/0	1/0	1/0	1/0	1/0	1/0	1/0	1/0	1/0	1/0	1/0	1/0
NC_037337.1:26130151-26130259(-)	BosSINEL	49.62	50.38	529	537	0	529	4	3	1/0	1/0	1/0	1/0	1/0	1/0	1/0	1/0	1/0	1/0	1/0	1/0	1/0	1/0	1/0	1/0	1/0	1/0	1/0	1/0	1/0	1/0	1/0	1/0	1/0	1/0	1/0	1/0	1/0	1/0	1/0	1/0	1/0	1/0	1/0	1/0	1/0	1/0	1/0	1/0
NC_037337.1:26346899-26347169(+)	BosSINEL	49.72	50.28	527	533	0	527	3	6	1/0	1/0	1/0	1/0	1/0	1/0	1/0	1/0	1/0	1/0	1/0	1/0	1/0	1/0	1/0	1/0	1/0	1/0	1/0	1/0	1/0	1/0	1/0	1/0	1/0	1/0	1/0	1/0	1/0	1/0	1/0	1/0	1/0	1/0	1/0	1/0	1/0	1/0	1/0	1/0
NC_037337.1:26762641-26762912(+)	BosSINEL	81.88	18.12	863	191	339	185	3	9	1/1	1/1	1/1	1/1	1/1	1/0	1/1	1/0	1/0	1/1	1/1	1/0	1/1	1/1	1/0	1/0	1/0	1/0	1/0	1/0	1/0	1/0	1/0	1/1	1/0	1/0	1/0	1/1	1/0	1/1	1/0	1/0	1/0	1/0	1/0	1/1	1/0	1/0	1/0	1/0
NC_037337.1:26896754-26897024(-)	BosSINEL	88.43	11.57	925	121	421	83	19	13	1/1	1/0	1/0	1/1	1/1	1/0	1/1	1/1	1/1	1/1	1/1	1/1	1/1	1/1	1/1	1/1	1/1	1/1	1/1	1/1	1/0	0/0	1/1	1/0	1/1	0/0	1/0	1/0	1/1	1/1	1/1	1/1	1/1	1/1	1/1	1/1	1/1	1/1	0/0	1/1
NC_037337.1:27019565-27019839(-)	BosSINEL	50.76	49.24	536	520	18	500	10	8	1/0	1/0	1/0	1/0	1/0	1/0	1/0	1/0	1/0	1/0	0/0	1/0	1/0	1/0	1/0	1/0	1/0	1/0	1/0	1/0	1/0	1/0	1/0	1/0	1/0	1/0	1/0	1/0	1/0	1/0	0/0	1/0	1/0	1/0	1/0	1/0	1/0	1/0	1/0	1/0
NC_037337.1:27323677-27323947(+)	BosSINEL	52.2	47.8	546	500	149	248	126	13	1/0	0/0	1/0	1/1	1/0	1/0	0/0	0/0	1/0	1/0	1/0	1/0	0/0	1/0	1/0	1/1	1/0	1/0	1/1	1/0	1/1	1/0	0/0	1/0	1/1	1/0	0/0	1/0	1/1	0/0	1/0	1/1	1/0	1/0	0/0	0/0	1/0	1/1	0/0	0/0
NC_037337.1:27598819-27599094(+)	BosSINEL	47.66	52.34	510	560	0	510	25	1	1/0	1/0	1/0	1/0	1/0	0/0	1/0	1/0	1/0	1/0	1/0	1/0	1/0	1/0	1/0	1/0	0/0	1/0	1/0	1/0	1/0	1/0	1/0	1/0	1/0	1/0	1/0	1/0	1/0	1/0	1/0	1/0	1/0	1/0	1/0	1/0	1/0	1/0	1/0	1/0
NC_037337.1:27608304-27608426(-)	BosSINEL	32.88	67.12	340	694	10	320	187	19	1/0	1/0	0/0	0/0	1/0	0/0	1/0	1/0	1/0	1/0	1/0	1/0	1/0	1/0	1/0	0/0	NA	1/1	0/0	1/0	1/0	0/0	1/0	1/0	0/0	0/0	1/0	1/0	0/0	1/0	1/0	0/0	1/0	1/0	1/0	1/0	1/0	0/0	1/0	1/0
NC_037337.1:27902551-27902826(-)	BosSINEL	49.52	50.48	517	527	154	209	159	14	1/0	1/0	1/0	0/0	1/1	1/0	1/0	1/1	1/1	1/1	0/0	1/0	1/1	1/0	1/0	0/0	1/1	1/0	0/0	1/0	1/0	1/0	1/0	1/1	0/0	1/0	1/0	1/1	0/0	1/0	1/0	0/0	1/0	0/0	1/0	0/0	1/0	0/0	1/1	1/1
NC_037337.1:27920451-27920728(+)	BosSINEL	50.66	49.34	537	523	12	513	5	6	1/0	1/0	1/0	1/0	1/1	1/0	1/0	1/0	1/0	1/0	1/0	1/0	1/0	1/0	1/0	1/0	1/0	1/0	1/0	1/0	1/0	1/0	1/0	1/0	1/0	1/0	1/0	1/0	1/0	1/0	1/0	1/0	1/0	1/0	1/0	1/0	1/0	1/0	1/0	1/0
NC_037337.1:29091603-29091871(-)	BosSINEL	72.51	27.49	757	287	240	277	5	14	1/0	1/1	1/0	1/0	1/0	1/0	1/1	1/0	1/0	0/0	1/0	1/0	1/0	1/0	1/0	1/0	1/0	1/1	1/0	1/0	1/0	1/1	1/0	1/0	1/0	1/0	1/1	1/1	1/0	1/0	1/1	1/1	1/0	1/0	1/0	1/0	1/1	1/0	1/0	1/0
NC_037337.1:29460730-29461004(-)	BosSINEL	49.25	50.75	528	544	0	528	8	0	1/0	1/0	1/0	1/0	1/0	1/0	1/0	1/0	1/0	1/0	1/0	1/0	1/0	1/0	1/0	1/0	1/0	1/0	1/0	1/0	1/0	1/0	1/0	1/0	1/0	1/0	1/0	1/0	1/0	1/0	1/0	1/0	1/0	1/0	1/0	1/0	1/0	1/0	1/0	1/0
NC_037337.1:29510047-29510307(-)	BosSINEL	48.69	51.31	520	548	0	520	14	2	1/0	1/0	1/0	1/0	1/0	1/0	1/0	1/0	1/0	1/0	1/0	1/0	1/0	1/0	1/0	1/0	1/0	1/0	1/0	1/0	1/0	1/0	1/0	1/0	1/0	1/0	1/0	1/0	1/0	1/0	1/0	1/0	1/0	1/0	1/0	1/0	1/0	1/0	1/0	1/0
NC_037337.1:30154226-30154486(-)	BosSINEL	60.47	39.53	641	419	118	405	7	6	1/0	1/1	1/0	1/0	1/0	1/0	1/0	1/0	1/0	1/0	1/0	1/0	1/0	1/0	1/0	1/0	1/0	1/0	1/0	1/1	1/0	1/0	1/0	1/0	1/0	1/1	1/0	1/0	1/0	1/0	1/0	1/0	1/0	1/0	1/0	1/0	1/0	1/0	1/0	1/0
NC_037337.1:30823946-30824199(+)	BosSINEL	75.29	24.71	789	259	267	255	2	12	1/1	1/0	1/0	1/0	1/1	1/1	1/1	1/1	1/1	1/1	1/1	1/1	1/1	1/1	1/1	1/1	1/1	1/1	1/1	1/1	1/0	1/0	1/1	1/1	1/1	1/1	1/1	1/1	1/0	1/1	1/1	1/1	1/0	1/1	1/0	1/1	1/0	1/1	1/1	1/1
NC_037337.1:31082253-31082385(-)	BosSINEL	75.76	24.24	794	254	271	252	1	12	1/1	1/0	1/1	1/1	1/0	1/0	1/1	1/1	1/0	1/1	1/1	1/0	1/1	1/1	1/0	1/1	1/0	1/1	1/0	1/0	1/0	1/0	1/0	1/0	1/1	1/0	1/0	1/0	1/0	1/0	1/0	1/0	1/0	1/1	1/0	1/0	1/0	1/1	1/1	1/0
NC_037337.1:31211781-31212056(-)	BosSINEL	78.31	21.69	827	229	303	221	4	8	1/1	1/1	1/1	1/1	1/1	1/0	1/0	1/1	1/0	1/0	1/1	1/1	1/0	1/0	1/1	1/1	1/0	1/0	1/0	1/0	1/1	1/0	1/0	1/0	1/0	1/1	1/0	1/0	1/0	1/0	1/0	1/0	1/0	1/0	1/0	1/0	1/0	1/0	1/0	1/0
NC_037337.1:31355093-31355366(-)	BosSINEL	68	32	680	320	205	270	25	36	1/0	1/0	1/1	1/1	1/0	1/1	NA	1/0	1/1	1/1	1/1	NA	1/0	1/0	1/1	1/0	0/0	1/0	1/0	1/1	1/1	1/0	1/0	0/0	1/0	1/0	1/0	1/0	1/0	0/0	1/0	1/1	1/0	1/0	0/0	NA	1/0	1/0	1/0	1/0
NC_037337.1:31512493-31512767(+)	BosSINEL	50.56	49.44	537	525	11	515	5	5	1/0	1/0	1/0	1/0	1/0	1/0	1/0	1/0	1/0	1/0	1/0	1/0	1/0	1/0	1/0	1/0	1/0	1/0	1/0	1/0	1/0	1/0	1/0	1/0	1/0	1/0	1/0	1/0	1/0	1/0	1/0	1/0	1/0	1/0	1/0	1/0	1/0	1/0	1/0	1/0
NC_037337.1:31991653-31991926(-)	BosSINEL	84.8	15.2	887	159	364	159	0	13	1/0	1/1	1/1	1/1	1/1	1/1	1/1	1/0	1/1	1/1	1/1	1/1	1/1	1/1	1/1	1/0	1/1	1/0	1/1	1/1	1/1	1/1	1/0	1/1	1/1	1/0	1/0	1/1	1/1	1/1	1/0	1/0	1/1	1/0	1/1	1/0	1/1	1/1	1/1	1/1
NC_037337.1:32133560-32133693(+)	BosSINEL	50.28	49.72	532	526	9	514	6	7	1/0	1/0	1/0	1/0	1/0	1/0	1/0	1/0	1/0	1/0	1/0	1/0	1/0	1/0	1/0	1/0	1/0	1/0	1/0	1/0	1/0	1/0	1/0	1/0	1/0	1/0	1/0	1/0	1/0	1/0	1/0	1/0	1/0	1/0	1/0	1/0	1/0	1/0	1/0	1/0
NC_037337.1:32284588-32284865(-)	BosSINEL	89.92	10.08	946	106	420	106	0	10	1/1	1/1	1/1	1/1	1/1	1/1	1/1	1/1	1/0	1/1	1/1	1/1	1/1	1/1	1/1	1/1	1/0	1/1	1/1	1/1	1/1	1/1	1/0	1/1	1/1	1/1	1/1	1/0	1/1	1/1	1/1	1/1	1/1	1/1	1/1	1/1	1/1	1/1	1/1	1/1
NC_037337.1:32380365-32380641(+)	BosSINEL	76.84	23.16	813	245	288	237	4	7	1/1	1/0	1/1	1/1	1/0	1/0	1/1	1/1	1/0	1/1	1/0	1/0	1/0	1/1	1/0	1/1	1/0	1/1	1/1	1/0	1/0	1/1	1/0	1/0	1/1	1/1	1/0	1/0	1/0	1/0	1/0	1/1	1/0	1/0	1/0	1/0	1/0	1/0	1/0	1/0
NC_037337.1:33345285-33345361(+)	BosSINEL	50.94	49.06	540	520	10	520	0	6	1/0	1/0	1/0	1/0	1/0	1/0	1/0	1/0	1/0	1/0	1/0	1/0	1/0	1/0	1/0	1/0	1/0	1/0	1/0	1/0	1/0	1/0	1/0	1/0	1/0	1/0	1/0	1/0	1/0	1/0	1/0	1/0	1/0	1/0	1/0	1/0	1/0	1/0	1/0	1/0
NC_037337.1:33605997-33606271(+)	BosSINEL	49.25	50.75	525	541	3	519	11	3	1/0	1/0	1/0	1/0	1/0	1/0	1/0	1/0	1/0	1/0	1/0	1/0	1/0	1/0	1/0	1/0	1/0	1/0	1/0	1/0	1/0	1/0	1/0	1/0	1/0	1/0	1/0	1/0	1/0	1/0	1/0	1/0	1/0	1/0	1/0	1/0	1/0	1/0	1/0	1/0
NC_037337.1:33924402-33924659(+)	BosSINEL	54.17	45.83	572	484	45	482	1	8	1/0	1/0	1/0	1/0	1/0	1/0	1/0	1/0	1/0	1/0	1/0	1/0	1/1	1/1	1/0	1/0	1/0	1/0	1/0	1/0	1/0	1/0	1/0	1/0	1/0	1/0	1/0	1/0	1/0	1/0	1/0	1/0	1/0	1/0	1/0	1/0	1/0	1/0	1/0	1/0
NC_037337.1:34224405-34224680(+)	BosSINEL	49.81	50.19	531	535	3	525	5	3	1/0	1/0	1/0	1/0	1/0	1/0	1/0	1/0	1/0	1/0	1/0	1/0	1/0	1/0	1/0	1/0	1/0	1/0	1/0	1/0	1/0	1/0	1/0	1/0	1/0	1/0	1/0	1/0	1/0	1/0	1/0	1/0	1/0	1/0	1/0	1/0	1/0	1/0	1/0	1/0
NC_037337.1:35014755-35015029(-)	BosSINEL	50.28	49.72	531	525	8	515	5	8	1/0	1/0	1/0	1/0	1/0	1/0	1/0	1/0	1/0	1/0	1/0	1/0	1/0	1/0	1/0	1/0	1/0	1/0	1/0	1/0	1/0	1/0	1/0	1/0	1/0	1/0	1/0	1/0	1/0	1/0	1/0	1/0	1/0	1/0	1/0	1/0	1/0	1/0	1/0	1/0
NC_037337.1:35025201-35025468(+)	BosSINEL	50.19	49.81	531	527	3	525	1	7	1/0	1/0	1/0	1/0	1/0	1/0	1/0	1/0	1/0	1/0	1/0	1/0	1/0	1/0	1/0	1/0	1/0	1/0	1/0	1/0	1/0	1/0	1/0	1/0	1/0	1/0	1/0	1/0	1/0	1/0	1/0	1/0	1/0	1/0	1/0	1/0	1/0	1/0	1/0	1/0
NC_037337.1:35878023-35878299(-)	BosSINEL	48.69	51.31	521	549	1	519	15	1	1/0	1/0	1/0	1/0	1/0	1/0	1/0	1/0	1/0	1/0	1/0	1/0	1/0	1/0	1/0	1/0	1/0	1/0	1/0	1/0	1/0	1/0	1/0	1/0	1/0	1/0	1/0	1/0	1/0	1/0	1/0	1/0	1/0	1/0	1/0	1/0	1/0	1/0	1/0	1/0
NC_037337.1:36334831-36335101(-)	BosSINEL	48.59	51.41	517	547	4	509	19	4	1/0	1/0	1/0	1/0	1/0	1/0	1/0	1/0	1/0	1/0	1/0	1/0	1/0	1/0	1/0	1/0	1/0	1/0	1/0	1/0	1/0	1/0	1/0	1/0	1/0	1/0	1/0	1/0	1/0	1/0	1/0	1/0	1/0	1/0	1/0	1/0	1/0	1/0	1/0	1/0
NC_037337.1:36556653-36556929(-)	BosSINEL	51.24	48.76	538	512	19	500	6	11	1/0	1/0	1/0	1/0	1/0	1/0	1/0	1/0	1/0	1/0	1/0	1/0	1/0	1/0	1/0	1/0	1/0	1/0	1/0	1/0	1/0	1/0	1/0	1/0	1/0	1/0	1/0	1/0	1/0	1/0	1/0	1/0	1/0	1/0	1/0	1/0	1/0	1/0	1/0	1/0
NC_037337.1:36682120-36682393(-)	BosSINEL	88.89	11.11	928	116	407	114	1	14	1/1	1/1	1/1	1/1	1/1	1/1	1/1	1/1	1/1	1/1	1/1	1/1	1/0	1/1	1/0	1/1	1/1	1/1	1/1	1/1	1/1	1/1	1/1	1/1	1/1	1/1	1/1	1/1	1/1	1/1	1/1	1/1	1/0	1/1	1/1	1/1	1/1	1/1	1/0	1/1
NC_037337.1:37051541-37051820(+)	BosSINEL	57.09	42.91	604	454	80	444	5	7	1/0	1/0	1/0	1/0	1/0	1/1	1/0	1/1	1/0	1/0	1/0	1/0	1/0	1/0	1/0	1/1	1/0	1/0	1/0	1/0	1/0	1/0	1/0	1/0	1/0	1/0	1/0	1/0	1/0	1/1	1/0	1/0	1/0	1/0	1/0	1/0	1/0	1/0	1/0	1/0
NC_037337.1:37340408-37340572(+)	BosSINEL	49.25	50.75	528	544	0	528	8	0	1/0	1/0	1/0	1/0	1/0	1/0	1/0	1/0	1/0	1/0	1/0	1/0	1/0	1/0	1/0	1/0	1/0	1/0	1/0	1/0	1/0	1/0	1/0	1/0	1/0	1/0	1/0	1/0	1/0	1/0	1/0	1/0	1/0	1/0	1/0	1/0	1/0	1/0	1/0	1/0
NC_037337.1:37410470-37410745(+)	BosSINEL	48.79	51.21	523	549	0	523	13	0	1/0	1/0	1/0	1/0	1/0	1/0	1/0	1/0	1/0	1/0	1/0	1/0	1/0	1/0	1/0	1/0	1/0	1/0	1/0	1/0	1/0	1/0	1/0	1/0	1/0	1/0	1/0	1/0	1/0	1/0	1/0	1/0	1/0	1/0	1/0	1/0	1/0	1/0	1/0	1/0
NC_037337.1:38819166-38819443(-)	BosSINEL	50.57	49.43	534	522	14	506	8	8	1/0	1/0	1/0	1/0	1/0	1/0	1/0	1/0	1/0	1/0	1/0	1/0	1/0	1/0	1/0	1/0	1/0	1/0	1/0	1/0	1/0	1/0	1/0	1/0	1/0	1/0	1/0	1/0	1/0	1/0	1/0	1/0	1/0	1/0	1/0	1/0	1/0	1/0	1/0	1/0
NC_037337.1:38870770-38871039(-)	BosSINEL	57.24	42.76	601	449	87	427	11	11	1/0	1/0	1/0	1/0	1/0	1/1	1/0	1/0	1/0	1/0	1/0	1/0	1/0	1/1	1/0	1/0	1/0	1/0	1/0	1/0	1/0	1/1	1/1	1/0	1/0	1/0	1/0	1/0	1/0	1/0	1/0	1/1	1/1	1/1	1/0	1/0	1/0	1/0	1/0	1/0
NC_037337.1:39424094-39424371(+)	BosSINEL	50	50	529	529	8	513	8	7	1/0	1/0	1/0	1/0	1/0	1/0	1/0	1/0	1/0	1/0	1/0	1/0	1/0	1/0	1/0	1/0	1/0	1/0	1/0	1/0	1/0	1/0	1/0	1/0	1/0	1/0	1/0	1/0	1/0	1/0	1/0	1/0	1/0	1/0	1/0	1/0	1/0	1/0	1/0	1/0
NC_037337.1:39424832-39424888(+)	BosSINEL	84.13	15.87	880	166	360	160	3	13	1/1	1/1	1/1	1/1	1/1	1/0	1/0	1/0	1/0	1/1	1/0	1/1	1/0	1/1	1/1	1/1	1/0	1/1	1/0	1/1	1/1	1/0	1/0	1/1	1/0	1/0	1/0	1/0	1/0	1/1	1/1	1/1	1/0	1/1	1/1	1/0	1/0	1/1	1/0	1/1
NC_037337.1:39538045-39538321(+)	BosSINEL	50.66	49.34	541	527	16	509	9	2	1/0	1/0	1/0	1/0	1/0	1/0	1/0	1/0	1/0	1/0	1/0	1/0	1/0	1/0	1/0	1/0	1/1	1/0	1/0	1/0	1/0	1/0	1/0	1/0	1/0	1/0	1/0	1/0	1/0	1/0	1/0	1/0	1/0	1/0	1/0	1/0	1/1	1/0	1/0	1/0
NC_037337.1:39549707-39549983(-)	BosSINEL	48.26	51.74	498	534	80	338	98	20	0/0	1/0	1/0	0/0	0/0	1/0	0/0	1/1	1/0	1/0	1/0	1/0	1/0	0/0	1/0	1/0	1/0	0/0	1/0	1/1	1/0	1/0	1/0	1/0	0/0	1/0	1/1	1/0	1/1	0/0	0/0	0/0	1/0	0/0	NA	0/0	1/0	1/0	1/0	1/0
NC_037337.1:41391512-41391621(+)	BosSINEL	51.15	48.85	534	510	12	510	0	14	1/0	1/0	1/0	1/0	1/0	1/0	1/0	1/0	1/0	1/0	1/0	1/0	1/0	1/0	1/0	1/0	1/0	1/0	1/0	1/0	1/0	1/0	1/0	1/0	1/0	1/0	1/0	1/0	1/0	1/0	1/0	1/0	1/0	1/0	1/0	1/0	1/0	1/0	1/0	1/0
NC_037337.1:41749209-41749484(+)	BosSINEL	63.66	36.34	671	383	146	379	2	9	1/0	1/1	1/0	1/1	1/1	1/0	1/0	1/0	1/0	1/0	1/0	1/1	1/0	1/0	1/0	1/0	1/0	1/0	1/0	1/0	1/0	1/0	1/0	1/0	1/0	1/0	1/1	1/0	1/0	1/0	1/1	1/0	1/0	1/0	1/0	1/0	1/0	1/0	1/0	1/1
NC_037337.1:42330097-42330370(+)	BosSINEL	50.38	49.62	534	526	14	506	10	6	1/0	1/0	1/0	1/0	1/0	1/0	1/0	1/0	1/0	1/0	1/0	1/0	1/0	1/0	1/0	1/0	1/0	1/0	1/0	1/0	1/0	1/0	1/0	1/0	1/0	1/0	1/0	1/0	1/0	1/0	1/0	1/0	1/0	1/0	1/0	1/0	1/0	1/0	1/0	1/0
NC_037337.1:43144669-43144754(+)	BosSINEL	49.34	50.66	527	541	6	515	13	2	1/0	1/0	1/0	1/0	1/0	1/0	1/0	1/0	1/0	1/0	1/0	1/0	1/0	1/0	1/0	1/0	1/0	1/0	1/0	1/0	1/0	1/0	1/0	1/0	1/0	1/0	1/0	1/0	1/0	1/0	1/0	1/0	1/0	1/0	1/0	1/0	1/0	1/0	1/0	1/0
NC_037337.1:43146864-43147132(+)	BosSINEL	81.21	18.79	856	198	329	198	0	9	1/0	1/1	1/1	1/1	1/0	1/0	1/1	1/0	1/1	1/0	1/0	1/0	1/0	1/1	1/0	1/1	1/0	1/1	1/1	1/0	1/0	1/1	1/0	1/1	1/1	1/0	1/0	1/1	1/1	1/0	1/0	1/0	1/0	1/0	1/0	1/1	1/1	1/1	1/0	1/1
NC_037337.1:43533459-43533587(+)	BosSINEL	82.57	17.43	867	183	342	183	0	11	1/1	1/0	1/1	1/1	1/1	1/0	1/1	1/1	1/1	1/1	1/1	1/0	1/1	1/0	1/0	1/0	1/1	1/1	1/0	1/0	1/1	1/0	1/1	1/0	1/1	1/0	1/0	1/1	1/0	1/1	1/0	1/0	1/1	1/0	1/0	1/0	1/1	1/1	1/0	1/0
NC_037337.1:43621796-43621965(+)	BosSINEL	50.47	49.53	533	523	9	515	4	8	1/0	1/0	1/0	1/0	1/0	1/0	1/0	1/0	1/0	1/0	1/0	1/0	1/0	1/0	1/0	1/0	1/0	1/0	1/0	1/0	1/0	1/0	1/0	1/0	1/0	1/0	1/0	1/0	1/0	1/0	1/0	1/0	1/0	1/0	1/0	1/0	1/0	1/0	1/0	1/0
NC_037337.1:43923639-43923911(+)	BosSINEL	49.16	50.84	527	545	0	527	9	0	1/0	1/0	1/0	1/0	1/0	1/0	1/0	1/0	1/0	1/0	1/0	1/0	1/0	1/0	1/0	1/0	1/0	1/0	1/0	1/0	1/0	1/0	1/0	1/0	1/0	1/0	1/0	1/0	1/0	1/0	1/0	1/0	1/0	1/0	1/0	1/0	1/0	1/0	1/0	1/0
NC_037337.1:46069227-46069496(-)	BosSINEL	88.46	11.54	920	120	401	118	1	16	1/1	1/1	1/1	1/1	1/1	1/1	1/1	1/1	1/1	1/1	1/1	1/1	1/1	1/1	1/1	1/1	1/0	1/1	1/1	1/1	1/1	1/1	1/1	1/1	1/1	1/1	1/1	1/0	1/1	1/0	1/1	1/1	1/0	1/1	1/1	1/1	1/1	1/1	1/0	1/1
NC_037337.1:47080419-47080688(-)	BosSINEL	87.36	12.64	919	133	398	123	5	10	1/1	1/1	1/1	1/0	1/1	1/1	1/1	1/1	1/0	1/1	1/1	1/0	1/1	1/1	1/1	1/1	1/1	1/1	1/0	1/0	1/1	1/1	1/1	1/1	1/1	1/0	1/1	1/1	1/0	1/1	1/0	1/1	1/0	1/0	1/1	1/1	1/0	1/1	1/1	1/1
NC_037337.1:47512025-47512294(-)	BosSINEL	49.15	50.85	522	540	0	522	9	5	1/0	1/0	1/0	1/0	1/0	1/0	1/0	1/0	1/0	1/0	1/0	1/0	1/0	1/0	1/0	1/0	1/0	1/0	1/0	1/0	1/0	1/0	1/0	1/0	1/0	1/0	1/0	1/0	1/0	1/0	1/0	1/0	1/0	1/0	1/0	1/0	1/0	1/0	1/0	1/0
NC_037337.1:47997196-47997472(+)	BosSINEL	74.19	25.81	776	270	255	266	2	13	1/0	1/0	1/1	1/0	1/0	1/0	1/0	1/0	1/0	1/0	1/0	1/1	1/0	1/1	1/1	1/0	1/0	1/0	1/1	1/0	1/1	1/0	1/0	1/0	1/0	1/0	1/0	1/1	1/0	1/0	1/0	1/0	1/1	1/0	1/0	1/1	1/1	1/0	1/1	1/0
NC_037337.1:48833510-48833785(+)	BosSINEL	61.03	38.97	642	410	120	402	4	10	1/1	1/0	1/1	1/0	1/0	1/0	1/0	1/0	1/0	1/0	1/0	1/0	1/0	1/0	1/0	1/0	1/0	1/0	1/0	1/0	1/0	1/0	1/0	1/0	1/0	1/0	1/0	1/0	1/0	1/0	1/0	1/0	1/0	1/0	1/0	1/0	1/0	1/0	1/0	1/0
NC_037337.1:48886381-48886646(+)	BosSINEL	85.71	14.29	900	150	377	146	2	11	1/1	1/1	1/1	1/0	1/1	1/1	1/1	1/1	1/0	1/1	1/1	1/1	1/1	1/1	1/1	1/0	1/1	1/1	1/1	1/1	1/0	1/0	1/0	1/1	1/0	1/1	1/1	1/1	1/0	1/0	1/0	1/1	1/1	1/1	1/1	1/1	1/1	1/1	1/0	1/0
NC_037337.1:49069121-49069384(-)	BosSINEL	84.28	15.72	890	166	362	166	0	8	1/1	1/1	1/1	1/0	1/0	1/1	1/0	1/1	1/1	1/1	1/1	1/0	1/1	1/1	1/1	1/0	1/1	1/0	1/1	1/0	1/1	1/1	1/1	1/1	1/1	1/1	1/0	1/0	1/0	1/0	1/1	1/1	1/0	1/0	1/1	1/1	1/0	1/0	1/1	1/1
NC_037337.1:49848366-49848642(+)	BosSINEL	48.88	51.12	522	546	0	522	12	2	1/0	1/0	1/0	1/0	1/0	1/0	1/0	1/0	1/0	1/0	1/0	1/0	1/0	1/0	1/0	1/0	1/0	1/0	1/0	1/0	1/0	1/0	1/0	1/0	1/0	1/0	1/0	1/0	1/0	1/0	1/0	1/0	1/0	1/0	1/0	1/0	1/0	1/0	1/0	1/0
NC_037337.1:50838163-50838439(+)	BosSINEL	86.81	13.19	915	139	388	139	0	9	1/1	1/1	1/1	1/1	1/1	1/0	1/0	1/1	1/1	1/1	1/0	1/1	1/0	1/1	1/0	1/1	1/1	1/1	1/1	1/1	1/1	1/0	1/1	1/1	1/1	1/0	1/1	1/0	1/1	1/0	1/1	1/1	1/1	1/1	1/1	1/1	1/1	1/1	1/1	1/1
NC_037337.1:50908118-50908385(+)	BosSINEL	50.75	49.25	538	522	15	508	7	6	1/0	1/0	1/0	1/0	1/0	1/0	1/0	1/0	1/0	1/0	1/0	1/0	1/0	1/0	1/0	1/0	1/0	1/0	1/0	1/0	1/0	1/0	1/0	1/0	1/0	1/0	1/0	1/0	1/0	1/0	1/0	1/0	1/0	1/0	1/0	1/0	1/0	1/0	1/0	1/0
NC_037337.1:50914059-50914334(+)	BosSINEL	50.28	49.72	533	527	12	509	9	6	1/0	1/0	1/0	1/0	1/0	1/0	1/0	1/0	1/0	1/0	1/0	1/0	1/0	1/0	1/0	1/0	1/0	1/0	1/0	1/0	1/0	1/0	1/0	1/0	1/0	1/0	1/0	1/0	1/0	1/0	1/0	1/0	1/0	1/0	1/0	1/0	1/0	1/0	1/0	1/0
NC_037337.1:51475409-51475674(-)	BosSINEL	87.28	12.72	906	132	387	132	0	17	1/1	1/1	1/0	1/1	1/1	1/1	1/1	1/0	1/1	1/0	1/1	1/1	1/0	1/1	1/0	1/1	1/1	1/1	1/0	1/1	1/0	1/1	1/1	1/1	1/1	1/1	1/1	1/0	1/1	1/1	1/1	1/1	1/0	1/0	1/1	1/1	1/1	1/1	1/1	1/0
NC_037337.1:51498386-51498660(+)	BosSINEL	61.05	38.95	641	409	121	399	5	11	1/0	1/1	1/0	1/0	1/0	1/0	1/1	1/0	1/0	1/0	1/0	1/0	1/0	1/0	1/1	1/0	1/0	1/1	1/0	1/0	1/0	1/0	1/1	1/0	1/1	1/1	1/1	1/0	1/0	1/0	1/0	1/0	1/0	1/0	1/0	1/0	1/0	1/0	1/0	1/0
NC_037337.1:51520848-51521121(+)	BosSINEL	49.53	50.47	528	538	0	528	5	3	1/0	1/0	1/0	1/0	1/0	1/0	1/0	1/0	1/0	1/0	1/0	1/0	1/0	1/0	1/0	1/0	1/0	1/0	1/0	1/0	1/0	1/0	1/0	1/0	1/0	1/0	1/0	1/0	1/0	1/0	1/0	1/0	1/0	1/0	1/0	1/0	1/0	1/0	1/0	1/0
NC_037337.1:52411249-52411525(-)	BosSINEL	84.79	15.21	892	160	368	156	2	10	1/1	1/1	1/1	1/1	1/1	1/0	1/1	1/1	1/1	1/1	1/1	1/1	1/0	1/0	1/0	1/1	1/0	1/0	1/0	1/0	1/0	1/1	1/0	1/0	1/1	1/0	1/1	1/0	1/0	1/0	1/0	1/1	1/1	1/1	1/1	1/1	1/0	1/0	1/1	1/0
NC_037337.1:52472891-52473017(+)	BosSINEL	86.7	13.3	867	133	371	125	4	36	1/0	1/1	1/1	1/1	1/0	NA	1/0	1/1	1/1	1/1	1/0	1/1	1/1	1/1	1/1	1/0	1/1	1/1	1/0	1/1	1/1	1/1	1/1	1/1	1/0	1/1	1/1	1/1	1/1	1/0	1/1	1/1	1/1	1/0	1/1	1/1	1/0	NA	1/1	1/0
NC_037337.1:52905774-52906041(-)	BosSINEL	49.81	50.19	528	532	3	522	5	6	1/0	1/0	1/0	1/0	1/0	1/0	1/0	1/0	1/0	1/0	1/0	1/0	1/0	1/0	1/0	1/0	1/0	1/0	1/0	1/0	1/0	1/0	1/0	1/0	1/0	1/0	1/0	1/0	1/0	1/0	1/0	1/0	1/0	1/0	1/0	1/0	1/0	1/0	1/0	1/0
NC_037337.1:53205480-53205754(-)	BosSINEL	53.71	46.29	565	487	45	475	6	10	1/0	1/0	1/0	1/0	1/0	1/0	1/0	1/0	1/0	1/0	1/0	1/0	1/0	1/0	1/0	1/0	1/0	1/0	1/0	1/0	1/0	1/0	1/0	1/0	1/0	1/0	1/0	1/0	1/0	1/0	1/0	1/0	1/0	1/0	1/0	1/0	1/0	1/0	1/0	1/0
NC_037337.1:53449606-53449876(+)	BosSINEL	48.79	51.21	522	548	0	522	13	1	1/0	1/0	1/0	1/0	1/0	1/0	1/0	1/0	1/0	1/0	1/0	1/0	1/0	1/0	1/0	1/0	1/0	1/0	1/0	1/0	1/0	1/0	1/0	1/0	1/0	1/0	1/0	1/0	1/0	1/0	1/0	1/0	1/0	1/0	1/0	1/0	1/0	1/0	1/0	1/0
NC_037337.1:54691862-54692139(-)	BosSINEL	65.74	34.26	689	359	170	349	5	12	1/1	1/0	1/1	1/0	1/1	1/0	1/0	1/0	1/0	1/0	1/0	1/0	1/0	1/0	1/0	1/1	1/0	1/1	1/0	1/0	1/0	1/0	1/0	1/1	1/0	1/0	1/0	1/0	1/0	1/0	1/0	1/0	1/0	1/1	1/0	1/0	1/0	1/1	1/0	1/1
NC_037337.1:54806506-54806779(-)	BosSINEL	66.29	33.71	700	356	174	352	2	8	1/0	1/0	1/0	1/0	1/1	1/1	1/1	1/1	1/0	1/1	1/0	1/1	1/0	1/0	1/0	1/0	1/1	1/1	1/0	1/0	1/1	1/0	1/1	1/1	1/0	1/1	1/1	1/0	1/0	1/1	1/0	1/1	1/0	1/0	1/1	1/0	1/0	1/0	1/1	1/0
NC_037337.1:55529758-55530028(-)	BosSINEL	63.36	36.64	664	384	141	382	1	12	1/0	1/0	1/0	1/0	1/0	1/0	1/0	1/0	1/0	1/0	1/0	1/0	1/1	1/0	1/0	1/0	1/0	1/1	1/0	1/0	1/0	1/1	1/0	1/0	1/0	1/1	1/0	1/0	1/0	1/1	1/0	1/0	1/0	1/0	1/0	1/0	1/0	1/0	1/0	1/0
NC_037337.1:56010439-56010714(-)	BosSINEL	49.06	50.94	524	544	1	522	11	2	1/0	1/0	1/0	1/0	1/0	1/0	1/0	1/0	1/0	1/0	1/0	1/0	1/0	1/0	1/0	1/0	1/0	1/0	1/0	1/0	1/0	1/0	1/0	1/0	1/0	1/0	1/0	1/0	1/0	1/0	1/0	1/0	1/0	1/0	1/0	1/0	1/0	1/0	1/0	1/0
NC_037337.1:56028543-56028817(-)	BosSINEL	64.88	35.12	676	366	161	354	6	15	1/0	1/0	1/0	1/0	1/0	1/1	1/0	1/1	1/1	1/1	1/1	1/0	1/1	1/1	1/0	1/1	1/1	1/0	1/0	1/0	1/1	1/1	1/0	1/0	1/0	1/0	1/0	1/1	1/0	1/0	1/0	1/1	1/0	1/1	1/1	1/0	1/1	1/0	1/1	1/1
NC_037337.1:56096015-56096285(-)	BosSINEL	54.61	45.39	569	473	55	459	7	15	1/0	1/0	1/0	1/0	1/0	1/0	1/0	1/1	1/0	1/0	1/0	1/0	1/0	1/0	1/0	1/0	1/0	1/0	0/0	1/0	1/0	1/0	1/0	1/0	1/0	1/0	1/0	1/0	1/0	1/0	1/0	1/0	1/0	1/0	1/0	1/0	1/0	1/0	1/0	1/0
NC_037337.1:56120498-56120602(-)	BosSINEL	49.25	50.75	528	544	0	528	8	0	1/0	1/0	1/0	1/0	1/0	1/0	1/0	1/0	1/0	1/0	1/0	1/0	1/0	1/0	1/0	1/0	1/0	1/0	1/0	1/0	1/0	1/0	1/0	1/0	1/0	1/0	1/0	1/0	1/0	1/0	1/0	1/0	1/0	1/0	1/0	1/0	1/0	1/0	1/0	1/0
NC_037337.1:56871896-56871962(+)	BosSINEL	83.43	16.57	871	173	352	167	3	14	1/1	1/1	1/1	1/0	1/1	1/1	1/1	1/0	1/0	1/1	1/0	1/1	1/0	1/1	1/1	1/1	1/0	1/0	1/1	1/0	1/0	1/0	1/1	1/0	1/1	1/0	1/1	1/0	1/0	1/0	NA	1/0	1/0	1/0	1/1	1/1	1/1	1/0	1/0	1/1
NC_037337.1:57012919-57013043(+)	BosSINEL	69.35	30.65	731	323	211	309	7	9	1/1	1/1	1/1	1/1	1/0	1/1	1/0	1/0	1/0	1/0	1/0	1/0	1/0	1/1	1/0	1/0	1/0	1/0	1/1	1/0	1/0	1/0	1/0	1/0	1/0	1/0	1/0	1/1	1/0	1/0	1/0	1/0	1/0	1/0	1/0	1/0	1/0	1/0	1/0	1/0
NC_037337.1:57482038-57482307(+)	BosSINEL	56.42	43.58	598	462	71	456	3	6	1/1	1/0	1/0	1/0	1/0	1/1	1/0	1/0	1/0	1/0	1/0	1/0	1/1	1/0	1/0	1/0	1/0	1/0	1/1	1/0	1/1	1/1	1/0	1/0	1/0	1/0	1/0	1/0	1/0	1/0	1/0	1/0	1/0	1/0	1/0	1/1	1/0	1/0	1/0	1/0
NC_037337.1:58291924-58292181(+)	BosSINEL	50.19	49.81	532	528	15	502	13	6	1/0	1/0	1/0	1/0	1/0	1/0	1/0	1/0	1/0	1/0	1/0	1/0	1/0	1/0	1/0	1/0	1/1	1/0	1/0	1/0	1/0	1/0	1/0	1/0	1/0	1/0	1/0	1/0	1/0	1/0	1/0	1/0	1/0	1/0	1/0	1/0	1/0	1/0	1/0	1/0
NC_037337.1:59636439-59636708(-)	BosSINEL	62.71	37.29	666	396	140	386	5	5	1/0	1/0	1/0	1/0	1/0	1/1	1/0	1/1	1/1	1/0	1/0	1/0	1/0	1/0	1/0	1/0	1/0	1/1	1/0	1/1	1/1	1/1	1/0	1/1	1/0	1/0	1/1	1/1	1/1	1/1	1/0	1/0	1/1	1/0	1/0	1/0	1/1	1/0	1/0	1/0
NC_037337.1:60237712-60237977(+)	BosSINEL	49.25	50.75	528	544	0	528	8	0	1/0	1/0	1/0	1/0	1/0	1/0	1/0	1/0	1/0	1/0	1/0	1/0	1/0	1/0	1/0	1/0	1/0	1/0	1/0	1/0	1/0	1/0	1/0	1/0	1/0	1/0	1/0	1/0	1/0	1/0	1/0	1/0	1/0	1/0	1/0	1/0	1/0	1/0	1/0	1/0
NC_037337.1:60277722-60277984(-)	BosSINEL	67.61	32.39	714	342	187	340	1	8	1/0	1/1	1/1	1/1	1/0	1/0	1/0	1/1	1/0	1/0	1/0	1/0	1/0	1/0	1/1	1/0	1/0	1/0	1/1	1/0	1/0	1/0	1/1	1/0	1/0	1/0	1/0	1/1	1/0	1/0	1/0	1/0	1/0	1/0	1/0	1/0	1/0	1/0	1/0	1/1
NC_037337.1:60284090-60284211(-)	BosSINEL	82.52	17.48	883	187	351	181	3	1	1/1	1/1	1/1	1/1	1/0	1/0	1/0	1/1	1/1	1/1	1/0	1/1	1/0	1/1	1/1	1/1	1/1	1/1	1/0	1/0	1/1	1/1	1/1	1/1	1/1	1/1	1/0	1/0	1/1	1/1	1/1	1/1	1/1	1/0	1/1	1/1	1/0	1/1	1/0	1/1
NC_037337.1:60527926-60528197(+)	BosSINEL	48.78	51.22	521	547	1	519	14	2	1/0	1/0	1/0	1/0	1/0	1/0	1/0	1/0	1/0	1/0	1/0	1/0	1/0	1/0	1/0	1/0	1/0	1/0	1/0	1/0	1/0	1/0	1/0	1/0	1/0	1/0	1/0	1/0	1/0	1/0	1/0	1/0	1/0	0/0	1/0	1/0	1/0	1/0	1/0	1/0
NC_037337.1:60698291-60698566(-)	BosSINEL	85.69	14.31	886	148	370	146	1	19	1/1	1/1	1/1	1/1	1/1	1/1	1/1	1/1	1/0	1/0	1/0	1/0	1/0	1/0	1/1	1/1	1/1	1/0	1/1	1/1	1/1	1/1	1/0	1/0	1/0	1/1	1/0	1/1	1/1	1/1	1/1	1/1	1/0	1/0	1/1	1/1	1/1	1/0	1/0	1/0
NC_037337.1:60789458-60789589(+)	BosSINEL	49.16	50.84	527	545	0	527	9	0	1/0	1/0	1/0	1/0	1/0	1/0	1/0	1/0	1/0	1/0	1/0	1/0	1/0	1/0	1/0	1/0	1/0	1/0	1/0	1/0	1/0	1/0	1/0	1/0	1/0	1/0	1/0	1/0	1/0	1/0	1/0	1/0	1/0	1/0	1/0	1/0	1/0	1/0	1/0	1/0
NC_037337.1:61016910-61017182(-)	BosSINEL	50.19	49.81	529	525	11	507	9	9	1/0	1/0	1/0	1/0	1/0	1/0	1/0	1/0	1/0	1/0	1/0	1/0	1/0	1/0	1/0	1/0	1/0	1/0	1/0	1/0	1/0	1/0	1/0	1/0	1/0	1/0	1/0	1/0	1/0	1/0	1/0	1/0	1/0	1/0	1/0	1/0	1/0	1/0	1/0	1/0
NC_037337.1:61272407-61272675(+)	BosSINEL	84.09	15.91	888	168	360	168	0	8	1/1	1/1	1/1	1/1	1/1	1/0	1/0	1/1	1/1	1/0	1/0	1/0	1/0	1/1	1/1	1/0	1/1	1/0	1/1	1/0	1/1	1/0	1/1	1/1	1/0	1/0	1/1	1/0	1/1	1/1	1/0	1/0	1/1	1/0	1/1	1/0	1/0	1/0	1/1	1/0
NC_037337.1:61440752-61440869(-)	BosSINEL	49.81	50.19	528	532	5	518	7	6	1/0	1/0	1/0	1/0	1/0	1/0	1/0	1/0	1/0	1/0	1/0	1/0	1/0	1/0	1/0	1/0	1/0	1/0	1/0	1/0	1/0	1/0	1/0	1/0	1/0	1/0	1/0	1/0	1/0	1/0	1/0	1/0	1/0	1/0	1/0	1/0	1/0	1/0	1/0	1/0
NC_037337.1:61580483-61580748(+)	BosSINEL	49.06	50.94	524	544	0	524	10	2	1/0	1/0	1/0	1/0	1/0	1/0	1/0	1/0	1/0	1/0	1/0	1/0	1/0	1/0	1/0	1/0	1/0	1/0	1/0	1/0	1/0	1/0	1/0	1/0	1/0	1/0	1/0	1/0	1/0	1/0	1/0	1/0	1/0	1/0	1/0	1/0	1/0	1/0	1/0	1/0
NC_037337.1:61935872-61936147(+)	BosSINEL	48.97	51.03	523	545	0	523	11	2	1/0	1/0	1/0	1/0	1/0	1/0	1/0	1/0	1/0	1/0	1/0	1/0	1/0	1/0	1/0	1/0	1/0	1/0	1/0	1/0	1/0	1/0	1/0	1/0	1/0	1/0	1/0	1/0	1/0	1/0	1/0	1/0	1/0	1/0	1/0	1/0	1/0	1/0	1/0	1/0
NC_037337.1:61986548-61986822(+)	BosSINEL	48.79	51.21	523	549	0	523	13	0	1/0	1/0	1/0	1/0	1/0	1/0	1/0	1/0	1/0	1/0	1/0	1/0	1/0	1/0	1/0	1/0	1/0	1/0	1/0	1/0	1/0	1/0	1/0	1/0	1/0	1/0	1/0	1/0	1/0	1/0	1/0	1/0	1/0	1/0	1/0	1/0	1/0	1/0	1/0	1/0
NC_037337.1:63586152-63586428(-)	BosSINEL	73.16	26.84	777	285	248	281	2	5	1/1	1/0	1/0	1/0	1/1	1/0	1/0	1/0	1/0	1/0	1/0	1/0	1/1	1/1	1/1	1/0	1/1	1/1	1/0	1/0	1/0	1/1	1/0	1/1	1/1	1/0	1/1	1/1	1/1	1/1	1/1	1/1	1/1	1/0	1/0	1/1	1/1	1/0	1/0	1/1
NC_037337.1:63632467-63632740(-)	BosSINEL	49.16	50.84	527	545	0	527	9	0	1/0	1/0	1/0	1/0	1/0	1/0	1/0	1/0	1/0	1/0	1/0	1/0	1/0	1/0	1/0	1/0	1/0	1/0	1/0	1/0	1/0	1/0	1/0	1/0	1/0	1/0	1/0	1/0	1/0	1/0	1/0	1/0	1/0	1/0	1/0	1/0	1/0	1/0	1/0	1/0
NC_037337.1:65203708-65203984(+)	BosSINEL	89.24	10.76	937	113	412	113	0	11	1/1	1/1	1/1	1/1	1/1	1/0	1/1	1/0	1/1	1/1	1/1	1/0	1/0	1/0	1/1	1/0	1/1	1/1	1/0	1/1	1/1	1/1	1/0	1/1	1/0	1/1	1/1	1/0	1/0	1/1	1/0	1/0	1/0	1/1	1/1	1/0	1/0	1/1	1/1	1/1
NC_037337.1:65397366-65397642(+)	BosSINEL	48.4	51.6	513	547	0	513	17	6	1/0	1/0	1/0	1/0	1/0	1/0	1/0	1/0	1/0	1/0	1/0	1/0	1/0	1/0	1/0	1/0	1/0	1/0	1/0	1/0	1/0	1/0	1/0	1/0	1/0	1/0	1/0	1/0	1/0	1/0	1/0	1/0	1/0	1/0	1/0	1/0	1/0	1/0	1/0	1/0
NC_037337.1:67365972-67366248(-)	BosSINEL	79.41	20.59	837	217	311	215	1	9	1/0	1/0	1/0	1/0	1/1	1/1	1/1	1/1	1/1	1/0	1/1	1/1	1/1	1/1	1/1	1/0	1/1	1/1	1/1	1/1	1/1	1/1	1/1	1/1	1/1	1/1	1/1	1/1	1/1	1/1	1/1	1/1	1/1	1/1	1/1	1/1	1/1	1/1	1/1	1/1
NC_037337.1:68061986-68062060(+)	BosSINEL	66.42	33.58	704	356	181	342	7	6	1/1	1/1	1/1	1/0	0/0	1/0	1/0	1/0	1/0	1/0	1/0	1/0	1/0	1/0	1/0	1/0	1/0	1/0	1/0	1/0	1/0	1/0	1/0	1/0	1/0	1/0	1/0	1/0	1/0	1/0	1/0	1/0	1/0	1/0	1/0	1/0	1/0	1/0	1/0	1/0
NC_037337.1:68897846-68897974(+)	BosSINEL	88.69	11.31	933	119	408	117	1	10	1/1	1/1	1/0	1/0	NA	1/0	1/1	1/1	1/1	1/1	1/1	1/1	1/1	1/1	1/1	1/1	1/1	1/1	1/1	1/0	1/1	1/1	1/1	1/1	1/1	1/1	1/1	1/0	1/1	1/0	1/1	1/1	1/1	1/1	1/1	1/1	1/1	1/1	1/1	1/1
NC_037337.1:69133939-69134207(+)	BosSINEL	56.62	43.38	599	459	72	455	2	7	1/1	1/0	1/0	1/0	1/0	1/0	1/0	1/0	1/0	1/0	1/1	1/0	1/0	1/0	1/0	1/0	1/0	1/0	1/0	1/0	1/0	1/0	1/0	1/0	1/0	1/0	1/0	1/0	1/0	1/0	1/0	1/0	1/0	1/0	1/1	1/0	1/0	1/0	1/0	1/0
NC_037337.1:70281419-70281687(-)	BosSINEL	49.07	50.93	526	546	0	526	10	0	1/0	1/0	1/0	1/0	1/0	1/0	1/0	1/0	1/0	1/0	1/0	1/0	1/0	1/0	1/0	1/0	1/0	1/0	1/0	1/0	1/0	1/0	1/0	1/0	1/0	1/0	1/0	1/0	1/0	1/0	1/0	1/0	1/0	1/0	1/0	1/0	1/0	1/0	1/0	1/0
NC_037337.1:70316392-70316556(-)	BosSINEL	48.04	51.96	514	556	0	514	21	1	1/0	1/0	1/0	1/0	1/0	1/0	1/0	1/0	1/0	1/0	1/0	1/0	1/0	1/0	1/0	1/0	1/0	1/0	1/0	1/0	1/0	1/0	1/0	1/0	1/0	1/0	1/0	1/0	1/0	1/0	1/0	1/0	1/0	1/0	1/0	1/0	1/0	1/0	1/0	1/0
NC_037337.1:71434871-71435147(+)	BosSINEL	84.34	15.66	867	161	361	145	8	22	1/1	1/1	1/1	1/1	1/1	1/1	1/0	1/1	1/0	NA	1/0	1/1	1/0	1/1	1/1	1/0	1/0	1/1	1/0	1/1	1/0	1/1	1/1	1/0	1/1	1/0	1/0	1/0	1/1	1/0	1/0	1/0	1/0	1/0	1/0	1/0	1/0	1/1	1/1	1/0
NC_037337.1:71994711-71994980(-)	BosSINEL	48.97	51.03	525	547	0	525	11	0	1/0	1/0	1/0	1/0	1/0	1/0	1/0	1/0	1/0	1/0	1/0	1/0	1/0	1/0	1/0	1/0	1/0	1/0	1/0	1/0	1/0	1/0	1/0	1/0	1/0	1/0	1/0	1/0	1/0	1/0	1/0	1/0	1/0	1/0	1/0	1/0	1/0	1/0	1/0	1/0
NC_037337.1:72171914-72172183(+)	BosSINEL	56.63	43.37	598	458	77	444	7	8	1/0	1/0	1/1	1/0	1/0	1/0	1/0	1/0	1/1	1/0	1/0	1/0	1/0	1/0	1/0	1/0	1/0	1/0	1/0	1/0	1/0	1/0	1/0	1/0	1/0	1/0	1/0	1/0	1/0	1/0	1/0	1/0	1/0	1/0	1/0	1/0	1/0	1/0	1/0	1/0
NC_037337.1:72415057-72415334(+)	BosSINEL	49.34	50.66	527	541	0	527	7	2	1/0	1/0	1/0	1/0	1/0	1/0	1/0	1/0	1/0	1/0	1/0	1/0	1/0	1/0	1/0	1/0	1/0	1/0	1/0	1/0	1/0	1/0	1/0	1/0	1/0	1/0	1/0	1/0	1/0	1/0	1/0	1/0	1/0	1/0	1/0	1/0	1/0	1/0	1/0	1/0
NC_037337.1:74290062-74290108(-)	BosSINEL	68.37	31.63	711	329	193	325	2	16	1/0	1/1	1/0	1/1	1/0	1/1	1/1	1/1	1/0	1/0	1/1	1/0	1/1	1/0	1/1	1/1	1/0	1/1	1/1	1/0	1/0	1/0	1/1	1/1	1/0	1/0	1/1	1/0	1/0	1/0	1/1	1/0	1/0	1/0	1/0	1/0	1/0	1/0	1/0	1/1
NC_037337.1:74845264-74845528(-)	BosSINEL	49.07	50.93	526	546	0	526	10	0	1/0	1/0	1/0	1/0	1/0	1/0	1/0	1/0	1/0	1/0	1/0	1/0	1/0	1/0	1/0	1/0	1/0	1/0	1/0	1/0	1/0	1/0	1/0	1/0	1/0	1/0	1/0	1/0	1/0	1/0	1/0	1/0	1/0	1/0	1/0	1/0	1/0	1/0	1/0	1/0
NC_037337.1:75059709-75059872(-)	BosSINEL	60.94	39.06	646	414	118	410	2	6	1/0	1/1	1/0	1/0	1/1	1/0	1/0	1/0	1/0	1/0	1/0	1/0	1/1	1/0	1/0	1/0	1/0	1/0	1/0	1/0	1/0	1/0	1/0	1/0	1/0	1/0	1/0	1/0	1/0	1/0	1/0	1/0	1/0	1/0	1/0	1/0	1/1	1/0	1/0	1/0
NC_037337.1:75140521-75140559(+)	BosSINEL	55.86	44.14	591	467	62	467	0	7	1/0	1/0	1/0	1/0	1/1	1/0	1/0	1/0	1/0	1/0	1/0	1/0	1/0	1/0	1/0	1/0	1/0	1/0	1/0	1/0	1/0	1/0	1/0	1/0	1/0	1/0	1/0	1/0	1/0	1/0	1/0	1/0	1/0	1/0	1/0	1/0	1/0	1/0	1/0	1/0
NC_037337.1:75300520-75300795(+)	BosSINEL	83.17	16.83	870	176	349	172	2	13	1/1	1/1	1/1	1/1	1/1	1/1	1/1	1/1	1/0	1/1	1/0	1/0	1/1	1/0	1/0	1/1	1/1	1/1	1/1	1/0	1/0	1/1	1/0	1/1	1/1	1/1	1/0	1/1	1/0	1/0	1/0	1/0	1/0	1/0	1/1	1/0	1/0	1/1	1/0	1/0
NC_037337.1:75395264-75395538(-)	BosSINEL	49.62	50.38	528	536	1	526	5	4	1/0	1/0	1/0	1/0	1/0	1/0	1/0	1/0	1/0	1/0	1/0	1/0	1/0	1/0	1/0	1/0	1/0	1/0	1/0	1/0	1/0	1/0	1/0	1/0	1/0	1/0	1/0	1/0	1/0	1/0	1/0	1/0	1/0	1/0	1/0	1/0	1/0	1/0	1/0	1/0
NC_037337.1:75897154-75897430(+)	BosSINEL	59.24	40.76	622	428	103	416	6	11	1/0	1/0	1/0	1/0	1/0	1/0	1/0	1/1	1/0	1/0	1/0	1/1	1/0	1/0	1/0	1/0	1/0	1/0	1/0	1/1	1/0	1/0	1/0	1/1	1/0	1/1	1/0	1/0	1/1	1/1	1/0	1/0	1/0	1/0	1/0	1/1	1/0	1/1	1/1	1/0
NC_037337.1:75958802-75959059(+)	BosSINEL	49.07	50.93	526	546	0	526	10	0	1/0	1/0	1/0	1/0	1/0	1/0	1/0	1/0	1/0	1/0	1/0	1/0	1/0	1/0	1/0	1/0	1/0	1/0	1/0	1/0	1/0	1/0	1/0	1/0	1/0	1/0	1/0	1/0	1/0	1/0	1/0	1/0	1/0	1/0	1/0	1/0	1/0	1/0	1/0	1/0
NC_037337.1:76402756-76402886(-)	BosSINEL	79.02	20.98	825	219	305	215	2	14	1/0	1/0	1/1	1/1	1/1	1/0	1/0	1/0	1/1	1/1	1/1	1/1	1/1	1/1	1/1	1/1	1/0	1/0	1/0	1/1	1/0	1/1	1/0	1/1	1/0	1/0	1/0	1/0	1/1	1/1	1/0	1/1	1/0	1/1	1/1	1/1	1/0	1/1	1/0	1/0
NC_037337.1:76506361-76506603(+)	BosSINEL	48.88	51.12	524	548	0	524	12	0	1/0	1/0	1/0	1/0	1/0	1/0	1/0	1/0	1/0	1/0	1/0	1/0	1/0	1/0	1/0	1/0	1/0	1/0	1/0	1/0	1/0	1/0	1/0	1/0	1/0	1/0	1/0	1/0	1/0	1/0	1/0	1/0	1/0	1/0	1/0	1/0	1/0	1/0	1/0	1/0
NC_037337.1:77012559-77012834(-)	BosSINEL	49.44	50.56	527	539	2	523	8	3	1/0	1/0	1/0	1/0	1/0	1/0	1/0	1/0	1/0	1/0	1/0	1/0	1/0	1/0	1/0	1/0	1/0	1/0	1/0	1/0	1/0	1/0	1/0	1/0	1/0	1/0	1/0	1/0	1/0	1/0	1/0	1/0	1/0	1/0	1/0	1/0	1/0	1/0	1/0	1/0
NC_037337.1:77699673-77699948(+)	BosSINEL	58.4	41.6	619	441	94	431	5	6	1/0	1/0	1/0	1/0	1/1	1/0	1/1	1/0	1/0	1/0	1/0	1/0	1/0	1/0	1/0	1/0	1/0	1/0	1/0	1/0	1/1	1/0	1/1	1/1	1/0	1/0	1/0	1/0	1/0	1/0	1/0	1/0	1/1	1/0	1/0	1/0	1/0	1/0	1/0	1/0
NC_037337.1:78357274-78357460(+)	BosSINEL	51.9	48.1	545	505	20	505	0	11	1/0	1/0	1/0	1/0	1/0	1/0	1/0	1/0	1/0	1/0	1/0	1/0	1/0	1/0	1/0	1/0	1/0	1/0	1/0	1/0	1/0	1/0	1/0	1/0	1/0	1/0	1/0	1/0	1/0	1/0	1/0	1/0	1/0	1/0	1/0	1/0	1/0	1/0	1/0	1/0
NC_037337.1:79520602-79520779(+)	BosSINEL	84.06	15.94	886	168	360	166	1	9	1/1	1/1	1/1	1/0	1/1	1/0	1/1	1/0	1/1	1/1	1/0	1/0	1/1	1/1	1/0	1/0	1/1	1/0	1/1	1/0	1/1	1/0	1/1	1/1	1/1	1/1	1/1	1/0	1/1	1/1	1/1	1/1	1/1	1/1	1/1	1/1	1/1	1/1	1/1	1/0
NC_037337.1:80995813-80996086(-)	BosSINEL	51.22	48.78	545	519	16	513	3	4	1/0	1/0	1/0	1/0	1/0	1/0	1/0	1/0	1/0	1/0	1/0	1/0	1/0	1/0	1/0	1/0	1/0	1/0	1/0	1/0	1/0	1/0	1/0	1/0	1/0	1/0	1/0	1/0	1/0	1/0	1/0	1/0	1/0	1/0	1/0	1/0	1/0	1/0	1/0	1/0
NC_037337.1:82044748-82045023(+)	BosSINEL	86.06	13.94	895	145	375	145	0	16	1/1	1/1	1/0	1/1	1/1	1/1	1/1	1/1	1/1	1/1	1/1	1/1	1/1	1/1	1/1	1/1	1/1	1/1	1/1	1/1	1/1	1/1	1/1	1/1	NA	1/1	1/1	1/1	1/1	1/1	1/1	1/1	1/1	1/1	1/1	1/1	1/1	1/1	1/1	1/1
NC_037337.1:82071693-82071964(-)	BosSINEL	49.16	50.84	526	544	0	526	9	1	1/0	1/0	1/0	1/0	1/0	1/0	1/0	1/0	1/0	1/0	1/0	1/0	1/0	1/0	1/0	1/0	1/0	1/0	1/0	1/0	1/0	1/0	0/0	1/0	1/0	1/0	1/0	1/0	1/0	1/0	1/0	1/0	1/0	1/0	1/0	1/0	1/0	1/0	1/0	1/0
NC_037337.1:82240961-82241232(+)	BosSINEL	86.61	13.39	899	139	380	139	0	17	1/1	1/1	1/1	1/1	1/1	1/1	1/1	1/1	1/1	1/1	1/1	1/1	1/1	1/1	1/1	1/1	1/1	1/1	1/0	1/1	1/0	1/0	1/1	1/1	1/0	1/1	1/1	1/1	1/1	1/1	1/1	1/1	1/1	1/1	1/1	1/1	1/1	1/0	1/0	1/1
NC_037337.1:82413027-82413302(-)	BosSINEL	49.15	50.85	521	539	0	521	9	6	1/0	1/0	1/0	1/0	1/0	1/0	1/0	1/0	1/0	1/0	1/0	1/0	1/0	1/0	1/0	1/0	1/0	1/0	1/0	1/0	1/0	1/0	1/0	1/0	1/0	1/0	1/0	1/0	1/0	1/0	1/0	1/0	1/0	1/0	1/0	1/0	1/0	1/0	1/0	1/0
NC_037337.1:82689647-82689923(-)	BosSINEL	49.25	50.75	526	542	0	526	8	2	1/0	1/0	1/0	1/0	1/0	1/0	1/0	1/0	1/0	1/0	1/0	1/0	1/0	1/0	1/0	1/0	1/0	1/0	1/0	1/0	1/0	1/0	1/0	1/0	1/0	1/0	1/0	1/0	1/0	1/0	1/0	1/0	1/0	1/0	1/0	1/0	1/0	1/0	1/0	1/0
NC_037337.1:83733373-83733645(-)	BosSINEL	49.07	50.93	526	546	0	526	10	0	1/0	1/0	1/0	1/0	1/0	1/0	1/0	1/0	1/0	1/0	1/0	1/0	1/0	1/0	1/0	1/0	1/0	1/0	1/0	1/0	1/0	1/0	1/0	1/0	1/0	1/0	1/0	1/0	1/0	1/0	1/0	1/0	1/0	1/0	1/0	1/0	1/0	1/0	1/0	1/0
NC_037337.1:84705953-84706229(-)	BosSINEL	49.53	50.47	525	535	7	511	12	6	1/0	1/0	1/0	1/0	1/0	1/0	1/0	1/0	1/0	1/0	1/0	1/0	1/0	1/0	1/0	1/0	1/0	1/0	1/0	1/0	1/0	1/0	1/0	1/0	1/0	1/0	1/0	1/0	1/0	1/0	1/0	1/0	1/0	1/0	1/0	1/0	1/0	1/0	1/0	1/0
NC_037337.1:84989697-84989973(+)	BosSINEL	64.53	35.47	684	376	162	360	8	6	1/0	1/1	1/0	1/0	1/0	1/1	1/0	1/0	1/1	1/0	1/0	1/1	1/1	1/0	1/0	1/0	1/0	1/0	1/0	1/0	1/0	1/0	1/0	1/1	1/0	1/0	1/0	1/0	1/0	1/0	1/0	1/0	1/0	1/0	1/1	1/0	1/0	1/0	1/0	1/0
NC_037337.1:86394814-86395090(+)	BosSINEL	48.97	51.03	523	545	0	523	11	2	1/0	1/0	1/0	1/0	1/0	1/0	1/0	1/0	1/0	1/0	1/0	1/0	1/0	1/0	1/0	1/0	1/0	1/0	1/0	1/0	1/0	1/0	1/0	1/0	1/0	1/0	1/0	1/0	1/0	1/0	1/0	1/0	1/0	1/0	1/0	1/0	1/0	1/0	1/0	1/0
NC_037337.1:86652914-86653188(+)	BosSINEL	64.82	35.18	678	368	172	334	17	13	1/0	1/1	1/0	1/0	0/0	1/0	1/0	1/0	1/1	1/0	1/0	1/0	1/0	1/1	1/0	1/0	1/0	1/0	1/0	1/0	1/0	1/0	1/0	1/0	1/1	1/0	1/0	1/0	0/0	1/0	1/0	1/0	1/1	1/0	1/0	1/0	1/0	1/0	1/0	1/0
NC_037337.1:86878212-86878484(+)	BosSINEL	79.09	20.91	832	220	341	150	35	10	1/1	1/1	0/0	1/0	0/0	1/1	1/1	1/1	0/0	1/1	1/1	1/0	1/1	1/0	1/1	1/1	1/1	1/1	0/0	1/1	1/1	0/0	1/1	1/0	1/1	0/0	1/1	1/1	1/0	1/1	1/0	1/0	0/0	0/0	1/1	1/1	1/1	1/0	1/0	1/1
NC_037337.1:87412405-87412670(-)	BosSINEL	49.44	50.56	528	540	7	514	13	2	1/0	1/0	1/0	1/0	1/0	1/0	1/0	1/0	1/0	1/0	1/0	1/0	1/0	1/0	1/0	1/0	1/0	1/0	1/0	1/0	1/0	1/0	1/0	1/0	1/0	1/0	1/0	1/0	1/0	1/0	1/0	1/0	1/0	1/0	1/0	1/0	1/0	1/0	1/0	1/0
NC_037337.1:88936243-88936365(-)	BosSINEL	74.23	25.77	775	269	256	263	3	14	1/0	1/0	1/1	1/1	1/0	1/1	1/0	1/0	1/0	1/1	1/1	1/1	1/1	1/0	1/0	1/0	1/1	1/0	1/1	1/0	1/1	1/1	1/1	1/1	1/0	1/0	1/1	1/0	1/1	1/0	1/0	1/0	1/0	1/0	1/0	1/1	1/0	1/1	1/1	1/1
NC_037337.1:89162304-89162574(-)	BosSINEL	86.8	13.2	901	137	382	137	0	17	1/1	1/1	1/0	1/1	1/1	1/1	1/1	1/1	1/0	1/1	1/1	1/1	1/1	1/0	1/1	1/1	1/1	1/0	1/1	1/1	1/1	1/1	1/1	1/0	1/1	1/1	1/1	1/0	1/1	1/0	1/1	1/0	1/0	1/0	1/0	1/1	1/1	1/0	1/1	1/1
NC_037337.1:91291321-91291453(-)	BosSINEL	87.71	12.29	921	129	398	125	2	11	1/1	1/0	1/1	1/1	1/1	1/1	1/1	1/1	1/1	1/1	1/1	1/1	1/1	1/1	1/1	1/1	1/1	1/1	1/0	1/0	1/0	1/1	1/1	1/1	1/0	1/0	1/1	1/1	1/0	1/1	1/1	1/1	1/0	1/0	1/0	1/1	1/1	1/0	1/1	1/0
NC_037337.1:91861929-91862204(-)	BosSINEL	69	31	730	328	201	328	0	7	1/1	1/0	1/0	1/0	1/0	1/1	1/0	1/0	1/1	1/0	1/0	1/0	1/0	1/0	1/0	1/0	1/1	1/0	1/1	1/0	1/0	1/0	1/0	1/1	1/0	1/0	1/0	1/1	1/0	1/0	1/1	1/0	1/0	1/1	1/0	1/1	1/1	1/0	1/0	1/0
NC_037337.1:91916351-91916620(-)	BosSINEL	49.25	50.75	527	543	2	523	10	1	1/0	1/0	1/0	1/0	1/0	1/0	1/0	1/0	1/0	1/0	1/0	1/0	1/0	1/0	1/0	1/0	0/0	1/0	1/0	1/0	1/0	1/0	1/0	1/0	1/0	1/0	1/0	1/0	1/0	1/0	1/0	1/0	1/0	1/0	1/0	1/0	1/0	1/0	1/0	1/0
NC_037337.1:92432599-92432876(+)	BosSINEL	49.43	50.57	522	534	1	520	7	8	1/0	1/0	1/0	1/0	1/0	1/0	1/0	1/0	1/0	1/0	1/0	1/0	1/0	1/0	1/0	1/0	1/0	1/0	1/0	1/0	1/0	1/0	1/0	1/0	1/0	1/0	1/0	1/0	1/0	1/0	1/0	1/0	1/0	1/0	1/0	1/0	1/0	1/0	1/0	1/0
NC_037337.1:93364745-93364906(+)	BosSINEL	33.84	66.16	358	700	4	350	175	7	1/0	1/0	0/0	1/0	1/0	1/0	0/0	1/0	0/0	1/0	1/0	1/0	0/0	0/0	0/0	1/0	1/0	1/0	1/0	1/0	1/0	0/0	1/0	0/0	1/0	1/0	1/0	1/0	0/0	0/0	1/0	0/0	1/0	1/0	0/0	1/0	1/0	1/0	1/0	1/0
NC_037337.1:93698157-93698279(-)	BosSINEL	50.75	49.25	538	522	11	516	3	6	1/0	1/0	1/0	1/0	1/0	1/0	1/0	1/0	1/0	1/0	1/0	1/0	1/0	1/0	1/0	1/0	1/0	1/0	1/0	1/0	1/0	1/0	1/0	1/0	1/0	1/0	1/0	1/0	1/0	1/0	1/0	1/0	1/0	1/0	1/0	1/0	1/0	1/0	1/0	1/0
NC_037337.1:93941060-93941335(-)	BosSINEL	48.88	51.12	522	546	0	522	12	2	1/0	1/0	1/0	1/0	1/0	1/0	1/0	1/0	1/0	1/0	1/0	1/0	1/0	1/0	1/0	1/0	1/0	1/0	1/0	1/0	1/0	1/0	1/0	1/0	1/0	1/0	1/0	1/0	1/0	1/0	1/0	1/0	1/0	1/0	1/0	1/0	1/0	1/0	1/0	1/0
NC_037337.1:94527275-94527543(+)	BosSINEL	52.28	47.72	551	503	32	487	8	9	1/0	1/0	1/0	1/0	1/0	1/0	1/0	1/1	1/0	1/0	1/0	1/0	1/0	1/0	1/0	1/0	1/0	1/0	1/0	1/0	1/0	1/0	1/0	1/0	1/0	1/0	1/0	1/0	1/0	1/0	1/0	1/0	1/0	1/0	1/0	1/0	1/0	1/0	1/0	1/0
NC_037337.1:96450223-96450498(+)	BosSINEL	88.2	11.8	919	123	400	119	2	15	1/1	1/1	1/1	1/1	1/1	1/1	1/1	1/1	1/0	1/0	1/1	1/0	1/1	1/1	1/1	1/1	1/0	1/1	1/1	1/0	1/1	1/0	1/1	1/1	1/1	1/1	1/0	1/0	1/1	1/0	1/1	1/1	1/0	1/1	1/1	1/1	1/1	1/1	1/0	1/0
NC_037337.1:97490959-97491236(+)	BosSINEL	81.51	18.49	851	193	329	193	0	14	1/0	1/0	1/0	1/1	1/1	1/1	1/1	1/1	1/1	1/0	1/1	1/0	1/1	1/1	1/1	1/0	1/0	1/1	1/1	1/1	1/1	1/0	1/0	1/1	1/1	1/1	1/1	1/1	1/1	1/1	1/1	1/0	1/1	1/1	1/1	1/0	1/1	1/0	1/1	1/1
NC_037337.1:98142444-98142719(-)	BosSINEL	56.83	43.17	599	455	100	399	28	9	1/1	1/1	1/0	1/0	1/0	1/0	1/0	1/0	1/0	1/0	1/0	1/0	1/0	1/0	1/0	1/0	1/0	1/1	1/1	1/0	1/0	1/0	1/0	1/1	1/0	1/0	1/0	1/0	1/0	1/0	0/0	1/0	1/0	1/1	1/0	1/0	1/0	1/0	1/0	1/0
NC_037337.1:100011953-100012231(-)	BosSINEL	78.05	21.95	818	230	294	230	0	12	1/1	1/1	1/1	1/1	1/1	1/1	1/0	1/1	1/0	1/0	1/0	1/0	1/0	1/0	1/0	1/1	1/0	1/1	1/1	1/0	1/0	1/0	1/0	1/0	1/1	1/1	1/1	1/0	1/0	1/0	1/1	1/1	1/0	1/0	1/1	1/0	1/1	1/0	1/0	1/1
NC_037337.1:100737729-100737981(+)	BosSINEL	71.73	28.27	746	294	228	290	2	16	1/0	1/1	1/1	1/0	1/0	1/1	1/0	1/0	1/0	1/1	1/0	1/1	1/1	1/0	1/0	1/0	1/0	1/0	1/0	1/1	1/0	1/1	1/0	1/1	1/0	1/1	1/1	1/0	1/1	1/0	1/0	1/1	1/0	1/1	1/1	1/0	1/0	1/0	1/1	1/0
NC_037337.1:102547016-102547275(-)	BosSINEL	51.04	48.96	539	517	21	497	10	8	1/0	1/0	1/0	1/0	1/0	1/0	1/0	1/0	1/0	1/0	1/0	1/0	1/0	1/0	1/0	1/0	1/0	1/0	1/0	1/0	1/0	1/0	1/0	1/0	1/0	1/0	1/0	1/0	1/0	1/0	1/0	1/0	1/0	1/0	1/0	1/0	1/0	1/0	1/0	1/0
NC_037337.1:103000342-103000617(+)	BosSINEL	52.55	47.45	556	502	31	494	4	7	1/0	1/0	1/0	1/0	1/0	1/0	1/0	1/0	1/0	1/0	1/0	1/0	1/0	1/0	1/0	1/0	1/0	1/0	1/0	1/0	1/0	1/0	1/0	1/0	1/0	1/0	1/0	1/0	1/0	1/0	1/0	1/0	1/0	1/1	1/0	1/0	1/0	1/0	1/0	1/0
NC_037337.1:103138238-103138522(-)	BosSINEL	48.6	51.4	521	551	0	521	15	0	1/0	1/0	1/0	1/0	1/0	1/0	1/0	1/0	1/0	1/0	1/0	1/0	1/0	1/0	1/0	1/0	1/0	1/0	1/0	1/0	1/0	1/0	1/0	1/0	1/0	1/0	1/0	1/0	1/0	1/0	1/0	1/0	1/0	1/0	1/0	1/0	1/0	1/0	1/0	1/0
NW_020191223.1:132126-132397(+)	BosSINEL	64.69	35.31	687	375	158	371	2	5	1/0	1/0	1/0	1/0	1/0	1/0	1/0	1/0	1/0	1/1	1/0	1/0	1/0	1/0	1/0	1/0	1/0	1/0	1/0	1/0	1/0	1/1	1/0	1/0	1/1	1/0	1/0	1/0	1/0	1/0	1/0	1/0	1/1	1/1	1/0	1/0	1/1	1/1	1/0	1/0
NW_020191223.1:201759-201838(-)	BosSINEL	53.4	46.6	566	494	38	490	2	6	1/0	1/0	1/0	1/0	1/0	1/0	1/0	1/0	1/1	1/0	1/0	1/0	1/0	1/0	1/0	1/0	1/1	1/0	1/1	1/0	1/0	1/0	1/0	1/0	1/0	1/0	1/0	1/0	1/0	1/0	1/0	1/0	1/0	1/0	1/0	1/0	1/0	1/0	1/0	1/0
NW_020191225.1:5327-5596(-)	BosSINEL	63.58	36.42	674	386	148	378	4	6	1/0	1/0	1/0	1/0	1/0	1/0	1/0	1/1	1/1	1/0	1/0	1/1	1/0	1/1	1/0	1/1	1/0	1/0	1/0	1/1	1/0	1/0	1/0	1/1	1/0	1/1	1/0	1/0	1/0	1/0	1/0	1/0	1/1	1/0	1/0	1/0	1/0	1/0	1/1	1/1
NW_020191239.1:14397-14672(+)	BosSINEL	76.05	23.95	759	239	313	133	53	37	1/1	1/1	1/0	1/1	0/0	1/0	1/0	1/1	NA	1/1	1/1	1/1	1/1	1/0	1/1	0/0	1/1	1/0	1/0	1/0	1/1	1/1	1/0	1/0	1/1	0/0	1/0	1/0	1/1	NA	1/1	1/0	1/1	0/0	1/0	1/1	1/0	1/1	1/1	0/0
NW_020191239.1:46744-47008(-)	BosSINEL	49.43	50.57	518	530	54	410	60	12	1/0	1/0	1/0	1/0	0/0	1/0	1/0	1/1	1/0	1/0	1/0	1/0	1/0	1/0	1/0	0/0	1/0	1/0	0/0	1/0	1/0	1/0	1/0	1/0	1/0	0/0	1/0	1/0	1/0	1/0	1/0	1/0	1/0	0/0	1/0	1/0	1/0	1/0	1/1	0/0
NW_020191239.1:59812-60088(-)	BosSINEL	48.47	51.53	506	538	44	418	60	14	1/0	1/0	1/1	1/0	0/0	1/0	0/0	1/0	1/0	1/1	1/0	1/0	1/0	1/0	1/0	0/0	1/0	1/0	1/1	1/0	1/0	1/0	1/0	1/0	1/0	0/0	1/0	1/0	1/0	1/0	1/0	1/1	1/0	0/0	1/0	1/0	1/0	1/0	1/0	0/0
NW_020191248.1:35372-35646(-)	BosSINEL	87.74	12.26	902	126	388	126	0	22	1/0	1/0	1/0	1/0	NA	1/1	1/1	1/1	1/1	1/1	1/1	1/1	1/1	1/1	1/0	1/0	1/1	1/1	1/1	1/1	1/1	1/0	1/0	1/1	1/1	1/1	1/1	1/1	1/1	1/1	1/1	1/1	1/1	1/1	1/1	1/1	1/1	1/1	1/1	1/1
NW_020191263.1:27556-27825(-)	BosSINEL	79.11	20.89	837	221	308	221	0	7	1/0	1/0	1/1	1/0	1/1	1/1	1/1	1/1	1/0	1/0	1/1	1/0	1/1	1/0	1/0	1/1	1/0	1/1	1/1	1/1	1/0	1/1	1/1	1/1	1/1	1/1	1/0	1/1	1/1	1/1	1/1	1/0	1/1	1/1	1/1	1/0	1/0	1/1	1/1	1/1
NW_020191298.1:87322-87598(+)	BosSINEL	49.91	50.09	528	530	3	522	4	7	1/0	1/0	1/0	1/0	1/0	1/0	1/0	1/0	1/0	1/0	1/0	1/0	1/0	1/0	1/0	1/0	1/0	1/0	1/0	1/0	1/0	1/0	1/0	1/0	1/0	1/0	1/0	1/0	1/0	1/0	1/0	1/0	1/0	1/0	1/0	1/0	1/0	1/0	1/0	1/0
NW_020191298.1:143127-143402(-)	BosSINEL	55.9	44.1	587	463	68	451	6	11	1/0	1/0	1/0	1/0	1/0	1/0	1/0	1/1	1/0	1/0	1/0	1/0	1/0	1/0	1/0	1/0	1/0	1/1	1/0	1/0	1/0	1/0	1/0	1/0	1/0	1/0	1/1	1/0	1/1	1/0	1/0	1/0	1/0	1/0	1/0	1/0	1/0	1/0	1/0	1/1
NW_020191298.1:158212-158488(-)	BosSINEL	50.47	49.53	535	525	13	509	8	6	1/0	1/0	1/0	1/0	1/0	1/0	1/0	1/0	1/0	1/0	1/0	1/0	1/0	1/0	1/0	1/0	1/0	1/0	1/0	1/0	1/0	1/0	1/0	1/0	1/0	1/0	1/0	1/0	1/0	1/0	1/0	1/0	1/0	1/0	1/0	1/0	1/0	1/0	1/0	1/0
NW_020191298.1:159413-159678(+)	BosSINEL	50	50	530	530	3	524	3	6	1/0	1/0	1/0	1/0	1/0	1/0	1/0	1/0	1/0	1/0	1/0	1/0	1/0	1/0	1/0	1/0	1/0	1/0	1/0	1/0	1/0	1/0	1/0	1/0	1/0	1/0	1/0	1/0	1/0	1/0	1/0	1/0	1/0	1/0	1/0	1/0	1/0	1/0	1/0	1/0
NW_020191298.1:170569-170705(+)	BosSINEL	83.84	16.16	877	169	357	163	3	13	1/1	1/0	1/0	1/0	1/1	1/0	1/1	1/1	1/1	1/0	1/1	1/1	1/1	1/1	1/1	1/1	1/0	1/1	1/1	1/1	1/1	1/0	1/1	1/1	1/1	1/1	1/0	1/1	1/1	1/1	1/1	1/0	1/1	1/1	1/0	1/1	1/0	1/1	1/0	1/0
NW_020191298.1:208087-208323(+)	BosSINEL	48.49	51.51	514	546	0	514	16	6	1/0	1/0	1/0	1/0	1/0	1/0	1/0	1/0	1/0	1/0	1/0	1/0	1/0	1/0	1/0	1/0	1/0	1/0	1/0	1/0	1/0	1/0	1/0	1/0	1/0	1/0	1/0	1/0	1/0	1/0	1/0	1/0	1/0	1/0	1/0	1/0	1/0	1/0	1/0	1/0
NC_037338.1:83151-83427(-)	BosSINEL	49.52	50.48	518	528	23	472	28	13	1/0	1/0	1/0	1/0	1/0	1/0	1/0	1/0	1/0	1/0	1/0	1/0	1/0	1/0	1/0	0/0	1/1	1/0	1/1	1/0	1/0	1/0	1/0	1/0	1/0	1/0	1/0	1/1	1/0	1/0	1/0	1/0	1/0	1/0	1/0	1/0	1/0	1/0	1/0	1/1
NC_037338.1:88701-88819(-)	BosSINEL	47.91	52.09	504	548	12	480	34	10	1/0	1/0	1/0	1/0	1/0	1/0	1/0	1/0	1/0	1/0	1/0	1/0	1/0	1/0	1/0	1/0	1/0	1/0	1/0	0/0	1/0	1/0	1/0	1/0	1/0	1/0	1/0	1/0	1/0	1/0	1/0	1/0	1/0	1/0	1/0	1/0	1/0	1/0	1/0	1/0
NC_037338.1:696394-696667(-)	BosSINEL	56.36	43.64	594	460	71	452	4	9	1/0	1/0	1/0	1/0	1/0	1/1	1/0	1/0	1/0	1/0	1/1	1/1	1/0	1/1	1/0	1/0	1/0	1/1	1/0	1/1	1/0	1/0	1/0	1/0	1/0	1/0	1/1	1/0	1/0	1/0	1/0	1/0	1/0	1/0	1/0	1/0	1/0	1/0	1/0	1/1
NC_037338.1:1427598-1427869(+)	BosSINEL	49.81	50.19	528	532	6	516	8	6	1/0	1/0	1/0	1/0	1/0	1/0	1/0	1/0	1/0	1/0	1/0	1/0	1/0	1/0	1/0	1/0	1/0	1/0	1/0	1/0	1/0	1/0	1/0	1/0	1/0	1/0	1/0	1/0	1/0	1/0	1/0	1/0	1/0	1/0	1/0	1/0	1/0	1/0	1/0	1/0
NC_037338.1:1432750-1433017(+)	BosSINEL	64.37	35.63	672	372	151	370	1	14	1/0	1/0	1/0	1/0	1/1	1/0	1/0	1/1	1/0	1/0	1/0	1/1	1/1	1/0	1/0	1/1	1/0	1/1	1/0	1/0	1/0	1/1	1/0	1/1	1/0	1/1	1/1	1/1	1/0	1/1	1/0	1/0	1/1	1/1	1/1	1/1	1/0	1/0	1/0	1/1
NC_037338.1:1800560-1800827(-)	BosSINEL	52.75	47.25	556	498	42	472	13	9	1/0	1/0	1/0	1/0	1/0	1/0	1/0	1/0	1/0	1/0	1/0	1/0	1/0	1/0	1/0	1/0	1/1	1/0	1/0	1/0	1/0	1/0	1/0	1/0	1/0	1/0	1/0	1/0	1/0	1/0	1/0	1/0	1/0	1/0	1/0	1/0	1/0	1/1	1/1	0/0
NC_037338.1:2131815-2131943(-)	BosSINEL	84.35	15.65	889	165	362	165	0	9	1/1	1/1	1/1	1/1	1/0	1/0	1/1	1/1	1/1	1/0	1/1	1/0	1/1	1/1	1/0	1/1	1/0	1/1	1/0	1/1	1/0	1/0	1/1	1/0	1/1	1/1	1/0	1/1	1/1	1/1	1/0	1/0	1/0	1/0	1/0	1/0	1/1	1/0	1/0	1/0
NC_037338.1:3313207-3313483(-)	BosSINEL	49.63	50.37	530	538	0	530	4	2	1/0	1/0	1/0	1/0	1/0	1/0	1/0	1/0	1/0	1/0	1/0	1/0	1/0	1/0	1/0	1/0	1/0	1/0	1/0	1/0	1/0	1/0	1/0	1/0	1/0	1/0	1/0	1/0	1/0	1/0	1/0	1/0	1/0	1/0	1/0	1/0	1/0	1/0	1/0	1/0
NC_037338.1:3640356-3640422(+)	BosSINEL	49.16	50.84	524	542	3	518	12	3	1/0	1/0	1/0	1/0	1/0	1/0	1/0	1/0	1/0	1/0	1/0	1/0	1/0	1/0	1/0	1/0	1/0	1/0	1/0	1/0	1/0	1/0	1/0	1/0	1/0	1/0	1/0	1/0	1/0	1/0	1/0	1/0	1/0	1/0	1/0	1/0	1/0	1/0	1/0	1/0
NC_037338.1:3891475-3891732(-)	BosSINEL	57.37	42.63	607	451	85	437	7	7	1/0	1/0	1/0	1/0	1/0	1/0	1/0	1/1	1/0	1/0	1/0	1/0	1/0	1/0	1/0	1/0	1/0	1/0	1/0	1/0	1/0	1/0	1/0	1/0	1/0	1/0	1/1	1/0	1/0	1/0	1/0	1/0	1/0	1/0	1/0	1/0	1/0	1/0	1/0	1/0
NC_037338.1:3981467-3981731(-)	BosSINEL	49.43	50.57	524	536	0	524	6	6	1/0	1/0	1/0	1/0	1/0	1/0	1/0	1/0	1/0	1/0	1/0	1/0	1/0	1/0	1/0	1/0	1/0	1/0	1/0	1/0	1/0	1/0	1/0	1/0	1/0	1/0	1/0	1/0	1/0	1/0	1/0	1/0	1/0	1/0	1/0	1/0	1/0	1/0	1/0	1/0
NC_037338.1:4776695-4776812(+)	BosSINEL	49.62	50.38	525	533	14	497	18	7	1/0	1/0	1/0	1/0	1/0	1/0	1/0	1/0	1/0	1/0	1/0	1/0	1/0	1/0	1/0	1/0	1/0	1/0	1/0	1/0	1/0	1/0	1/0	1/0	1/0	1/0	1/0	1/0	1/0	1/0	1/0	1/0	1/0	1/0	1/0	1/0	1/0	1/0	1/0	1/0
NC_037338.1:5740489-5740765(-)	BosSINEL	51.6	48.4	548	514	23	502	6	5	1/0	1/0	1/0	1/0	1/0	1/0	1/0	1/0	1/0	1/0	1/0	1/0	1/0	1/0	1/0	1/0	1/0	1/0	1/0	1/0	1/0	1/0	1/0	1/0	1/0	1/0	1/0	1/0	1/0	1/0	1/0	1/0	1/0	1/0	1/0	1/0	1/0	1/0	1/0	1/0
NC_037338.1:6265867-6266142(+)	BosSINEL	49.06	50.94	521	541	0	521	10	5	1/0	1/0	1/0	1/0	1/0	1/0	1/0	1/0	1/0	1/0	1/0	1/0	1/0	1/0	1/0	1/0	1/0	1/0	1/0	1/0	1/0	1/0	1/0	1/0	1/0	1/0	1/0	1/0	1/0	1/0	1/0	1/0	1/0	1/0	1/0	1/0	1/0	1/0	1/0	1/0
NC_037338.1:6797219-6797494(+)	BosSINEL	49.07	50.93	525	545	0	525	10	1	1/0	1/0	1/0	1/0	1/0	1/0	1/0	1/0	1/0	1/0	1/0	1/0	1/0	1/0	1/0	1/0	1/0	1/0	1/0	1/0	1/0	1/0	1/0	1/0	1/0	1/0	1/0	1/0	1/0	1/0	1/0	1/0	1/0	1/0	1/0	1/0	1/0	1/0	1/0	1/0
NC_037338.1:6898445-6898711(+)	BosSINEL	61.79	38.21	650	402	127	396	3	10	1/0	1/0	1/0	1/0	1/1	1/0	1/0	1/0	1/0	1/0	1/1	1/0	1/0	1/1	1/0	1/1	1/0	1/0	1/1	1/1	1/1	1/0	1/1	1/0	1/0	1/0	1/0	1/1	1/1	1/0	1/1	1/0	1/0	1/0	1/0	1/0	1/0	1/1	1/0	1/0
NC_037338.1:7486727-7486990(+)	BosSINEL	55.75	44.25	591	469	65	461	4	6	1/0	1/1	1/0	1/0	1/0	1/0	1/0	1/0	1/0	1/0	1/0	1/0	1/0	1/0	1/0	1/0	1/0	1/0	1/0	1/0	1/0	1/0	1/0	1/0	1/0	1/0	1/0	1/0	1/0	1/0	1/0	1/0	1/0	1/0	1/0	1/0	1/0	1/0	1/0	1/0
NC_037338.1:8086936-8087195(+)	BosSINEL	55.49	44.51	576	462	59	458	2	17	1/0	1/0	1/0	1/0	1/0	1/0	1/0	1/0	1/0	1/0	1/0	1/0	1/0	1/1	1/1	1/0	1/1	1/0	1/0	1/0	1/0	1/0	1/1	1/1	1/0	1/0	1/0	1/0	1/0	1/0	1/0	1/0	1/0	1/0	1/0	1/0	1/1	1/1	1/0	1/0
NC_037338.1:9027909-9027978(+)	BosSINEL	51.78	48.22	552	514	19	514	0	3	1/0	1/0	1/0	1/0	1/0	1/0	1/0	1/0	1/0	1/0	1/0	1/0	1/0	1/0	1/0	1/0	1/0	1/0	1/0	1/0	1/0	1/0	1/0	1/0	1/0	1/0	1/0	1/0	1/0	1/0	1/0	1/0	1/0	1/0	1/0	1/0	1/0	1/0	1/0	1/0
NC_037338.1:9090319-9090570(-)	BosSINEL	86.29	13.71	906	144	381	144	0	11	1/1	1/1	1/1	1/1	1/1	1/0	1/1	1/1	1/0	1/1	1/1	1/1	1/1	1/1	1/0	1/0	1/1	1/1	1/1	1/1	1/0	1/0	1/0	1/1	1/0	1/0	1/1	1/1	1/0	1/1	1/0	1/1	1/1	1/0	1/1	1/1	1/1	1/1	1/1	1/0
NC_037338.1:9696378-9696653(+)	BosSINEL	68.45	31.55	716	330	200	316	7	13	1/0	1/1	1/1	1/1	1/0	1/0	1/0	1/0	1/0	1/0	1/0	1/1	1/0	1/0	1/1	1/0	1/0	1/0	1/0	1/0	1/0	1/0	1/0	1/0	1/0	1/0	1/0	1/0	1/0	1/0	1/0	1/0	1/0	1/0	1/0	1/0	1/0	1/0	1/0	1/0
NC_037338.1:10301719-10301988(+)	BosSINEL	84.89	15.11	888	158	367	154	2	13	1/1	1/1	1/1	1/1	1/0	1/1	1/1	1/1	1/1	1/1	1/1	1/1	1/1	1/1	1/1	1/0	1/1	1/1	1/0	1/0	1/0	1/1	1/1	1/1	1/0	1/0	1/1	1/1	1/0	1/1	1/0	1/0	1/1	1/1	1/1	1/0	1/1	1/1	1/0	1/0
NC_037338.1:10463642-10463827(+)	BosSINEL	68.06	31.94	716	336	192	332	2	10	1/0	1/0	1/0	1/0	1/1	1/0	1/0	1/0	1/1	1/0	1/1	1/1	1/1	1/0	1/1	1/0	1/1	1/0	1/0	1/1	1/0	1/1	1/0	1/1	1/0	1/0	1/1	1/0	1/1	1/0	1/1	1/1	1/1	1/1	1/1	1/0	1/0	1/0	1/1	1/0
NC_037338.1:10483237-10483502(-)	BosSINEL	60.31	39.69	632	416	111	410	3	12	1/0	1/0	1/0	1/0	1/0	1/0	1/0	1/0	1/0	1/0	1/0	1/0	1/0	1/0	1/0	1/0	1/0	1/0	1/0	1/0	1/0	1/0	1/0	1/0	1/0	1/0	1/0	1/0	1/0	1/0	1/0	1/0	1/0	1/0	1/0	1/0	1/0	1/0	1/0	1/0
NC_037338.1:11307239-11307270(+)	BosSINEL	50.19	49.81	525	521	14	497	12	13	1/0	1/0	1/0	1/0	1/0	1/0	1/0	1/0	1/0	1/0	1/0	1/0	1/0	1/0	1/0	1/0	1/0	1/0	1/0	1/0	1/0	1/0	1/0	1/0	1/0	1/0	1/0	1/0	1/0	1/0	1/0	1/0	1/0	1/0	1/0	1/0	1/0	1/0	1/0	1/0
NC_037338.1:11875105-11875371(-)	BosSINEL	49.53	50.47	529	539	0	529	5	2	1/0	1/0	1/0	1/0	1/0	1/0	1/0	1/0	1/0	1/0	1/0	1/0	1/0	1/0	1/0	1/0	1/0	1/0	1/0	1/0	1/0	1/0	1/0	1/0	1/0	1/0	1/0	1/0	1/0	1/0	1/0	1/0	1/0	1/0	1/0	1/0	1/0	1/0	1/0	1/0
NC_037338.1:12317367-12317531(-)	BosSINEL	53.66	46.34	572	494	48	476	9	3	1/0	1/0	1/0	1/0	1/0	1/0	1/0	1/0	1/0	1/0	1/1	1/0	1/0	1/0	1/0	1/0	1/0	1/0	1/0	1/0	1/0	1/1	1/1	1/0	1/0	1/1	1/0	1/0	1/0	1/0	1/0	1/0	1/0	1/0	1/0	1/0	1/0	1/0	1/0	1/0
NC_037338.1:12944598-12944871(-)	BosSINEL	65.5	34.5	693	365	166	361	2	7	1/1	1/0	1/1	1/1	1/0	1/0	1/1	1/1	1/0	1/0	1/0	1/0	1/0	1/0	1/0	1/0	1/1	1/0	1/0	1/0	1/0	1/0	1/0	1/0	1/0	1/0	1/0	1/1	1/1	1/1	1/0	1/0	1/0	1/1	1/1	1/0	1/1	1/1	1/0	1/0
NC_037338.1:14290841-14291117(-)	BosSINEL	55.16	44.84	588	478	60	468	5	3	1/0	1/0	1/0	1/0	1/0	1/0	1/0	1/0	1/1	1/1	1/0	1/1	1/0	1/0	1/0	1/0	1/0	1/1	1/0	1/0	1/0	1/0	1/0	1/0	1/0	1/0	1/1	1/0	1/0	1/0	1/0	1/0	1/1	1/0	1/0	1/0	1/0	1/0	1/0	1/0
NC_037338.1:14511907-14512184(-)	BosSINEL	49.25	50.75	526	542	0	526	8	2	1/0	1/0	1/0	1/0	1/0	1/0	1/0	1/0	1/0	1/0	1/0	1/0	1/0	1/0	1/0	1/0	1/0	1/0	1/0	1/0	1/0	1/0	1/0	1/0	1/0	1/0	1/0	1/0	1/0	1/0	1/0	1/0	1/0	1/0	1/0	1/0	1/0	1/0	1/0	1/0
NC_037338.1:15455567-15455815(-)	BosSINEL	48.88	51.12	523	547	0	523	12	1	1/0	1/0	1/0	1/0	1/0	1/0	1/0	1/0	1/0	1/0	1/0	1/0	1/0	1/0	1/0	1/0	1/0	1/0	1/0	1/0	1/0	1/0	1/0	1/0	1/0	1/0	1/0	1/0	1/0	1/0	1/0	1/0	1/0	1/0	1/0	1/0	1/0	1/0	1/0	1/0
NC_037338.1:15946748-15947023(+)	BosSINEL	50.75	49.25	539	523	20	499	12	5	1/0	1/0	1/0	1/0	1/0	1/0	1/0	1/0	1/0	1/0	1/0	1/0	1/0	1/0	1/0	1/0	1/0	1/0	1/0	1/0	1/0	1/0	1/0	1/0	1/0	1/0	1/0	1/0	1/0	1/0	1/0	1/0	1/0	1/0	1/0	1/0	1/0	1/0	1/0	1/0
NC_037338.1:16086412-16086596(+)	BosSINEL	55.47	44.53	578	464	65	448	8	15	1/0	1/0	1/0	1/0	1/0	1/0	1/0	1/0	1/0	1/0	1/1	1/0	1/0	1/0	1/0	1/0	1/1	1/0	1/0	1/0	1/0	1/0	1/0	1/0	1/0	1/0	1/0	1/0	1/0	1/0	1/0	1/0	1/1	1/0	1/0	1/0	1/0	1/1	1/0	1/0
NC_037338.1:16615359-16615493(+)	BosSINEL	87.76	12.24	925	129	398	129	0	9	1/1	1/1	1/1	1/1	1/1	1/1	1/1	1/0	1/0	1/1	1/0	1/1	1/0	1/1	1/1	1/0	1/1	1/1	1/1	1/1	1/1	1/1	1/0	1/1	1/0	1/0	1/0	1/1	1/1	1/1	1/1	1/1	1/1	1/1	1/1	1/0	1/1	1/0	1/0	1/0
NC_037338.1:17269482-17269746(+)	BosSINEL	49.07	50.93	525	545	1	523	11	1	1/0	1/0	1/0	1/0	1/0	1/0	1/0	1/0	1/0	1/0	1/0	1/0	1/0	1/0	1/0	1/0	1/0	1/0	1/0	1/0	1/0	1/0	1/0	1/0	1/0	1/0	1/0	1/0	1/0	1/0	1/0	1/0	1/0	1/0	1/0	1/0	1/0	1/0	1/0	1/0
NC_037338.1:17270134-17270244(-)	BosSINEL	89.64	10.36	943	109	417	109	0	10	1/1	1/0	1/0	1/1	1/1	1/1	1/1	1/1	1/1	1/1	1/1	1/1	1/1	1/1	1/1	1/1	1/1	1/1	1/1	1/1	1/1	1/1	1/1	1/1	1/1	1/1	1/1	1/1	1/1	1/1	1/1	1/1	1/1	1/1	1/1	1/1	1/1	1/1	1/1	1/1
NC_037338.1:17433548-17433822(-)	BosSINEL	53.11	46.89	563	497	40	483	7	6	1/0	1/0	1/0	1/0	1/0	1/0	1/0	1/0	1/0	1/0	1/0	1/0	1/0	1/0	1/0	1/0	1/0	1/0	1/0	1/0	1/0	1/0	1/0	1/0	1/0	1/0	1/0	1/0	1/0	1/0	1/0	1/0	1/0	1/0	1/0	1/0	1/0	1/0	1/0	1/0
NC_037338.1:17718960-17719233(+)	BosSINEL	58.13	41.87	615	443	93	429	7	7	1/0	1/1	1/0	1/0	1/0	1/0	1/0	1/0	1/0	1/0	1/0	1/0	1/0	1/0	1/0	1/0	1/0	1/0	1/0	1/0	1/0	1/0	1/0	1/0	1/0	1/0	1/0	1/0	1/0	1/0	1/0	1/0	1/0	1/0	1/0	1/0	1/0	1/0	1/0	1/0
NC_037338.1:17904140-17904413(-)	BosSINEL	49.06	50.94	524	544	1	522	11	2	1/0	1/0	1/0	1/0	1/0	1/0	1/0	1/0	1/0	1/0	1/0	1/0	1/0	1/0	1/0	1/0	1/0	1/0	1/0	1/0	1/0	1/0	1/0	1/0	1/0	1/0	1/0	1/0	1/0	1/0	1/0	1/0	1/0	1/0	1/0	1/0	1/0	1/0	1/0	1/0
NC_037338.1:18169968-18170234(-)	BosSINEL	49.44	50.56	527	539	0	527	6	3	1/0	1/0	1/0	1/0	1/0	1/0	1/0	1/0	1/0	1/0	1/0	1/0	1/0	1/0	1/0	1/0	1/0	1/0	1/0	1/0	1/0	1/0	1/0	1/0	1/0	1/0	1/0	1/0	1/0	1/0	1/0	1/0	1/0	1/0	1/0	1/0	1/0	1/0	1/0	1/0
NC_037338.1:18263206-18263262(+)	BosSINEL	62.57	37.43	662	396	135	392	2	7	1/0	1/0	1/0	1/0	1/0	1/1	1/1	1/1	1/0	1/0	1/1	1/0	1/1	1/0	1/0	1/0	1/1	1/1	1/0	1/0	1/0	1/0	1/1	1/1	1/0	1/0	1/1	1/0	1/0	1/0	1/1	1/0	1/0	1/1	1/1	1/0	1/0	1/0	1/0	1/1
NC_037338.1:19073690-19073966(-)	BosSINEL	49.62	50.38	529	537	2	525	6	3	1/0	1/0	1/0	1/0	1/0	1/0	1/0	1/0	1/0	1/0	1/0	1/0	1/0	1/0	1/0	1/0	1/0	1/0	1/0	1/0	1/0	1/0	1/0	1/0	1/0	1/0	1/0	1/0	1/0	1/0	1/0	1/0	1/0	1/0	1/0	1/0	1/0	1/0	1/0	1/0
NC_037338.1:19470849-19471111(+)	BosSINEL	50.38	49.62	533	525	6	521	2	7	1/0	1/0	1/0	1/0	1/0	1/0	1/0	1/0	1/0	1/0	1/0	1/0	1/0	1/0	1/0	1/0	1/0	1/0	1/0	1/0	1/0	1/0	1/0	1/0	1/0	1/0	1/0	1/0	1/0	1/0	1/0	1/0	1/0	1/0	1/0	1/0	1/0	1/0	1/0	1/0
NC_037338.1:20124523-20124800(+)	BosSINEL	58.27	41.73	613	439	90	433	3	10	1/0	1/0	1/0	1/0	1/1	1/0	1/0	1/0	1/0	1/0	1/1	1/0	1/0	1/1	1/0	1/0	1/0	1/0	1/0	1/0	1/0	1/0	1/1	1/0	1/0	1/0	1/0	1/1	1/0	1/0	1/0	1/1	1/0	1/1	1/0	1/0	1/0	1/0	1/0	1/0
NC_037338.1:20147121-20147214(+)	BosSINEL	52.81	47.19	563	503	44	475	14	3	1/0	1/0	1/0	1/0	1/0	1/0	1/0	1/0	1/0	1/0	1/0	1/0	1/0	1/0	1/0	1/0	1/0	1/0	1/0	1/0	1/0	1/0	1/0	1/0	1/0	1/0	1/0	1/1	1/0	1/0	1/0	1/0	1/0	1/0	1/0	1/0	1/0	1/0	1/0	1/0
NC_037338.1:20950783-20951051(-)	BosSINEL	71.24	28.76	758	306	228	302	2	4	1/0	1/0	1/1	1/0	1/0	1/0	1/1	1/1	1/1	1/1	1/0	1/1	1/1	1/0	1/1	1/1	1/1	1/0	1/0	1/0	1/1	1/0	1/0	1/1	1/1	1/0	1/1	1/1	1/0	1/1	1/1	1/0	1/1	1/0	1/1	1/0	1/0	1/0	1/1	1/0
NC_037338.1:21031128-21031206(+)	BosSINEL	52.54	47.46	559	505	37	485	10	4	1/0	1/0	1/0	1/0	1/0	1/0	1/0	1/0	1/0	1/0	1/0	1/0	1/0	1/0	1/0	1/0	1/0	1/0	1/0	1/0	1/0	1/0	1/0	1/0	1/0	1/0	1/0	1/0	1/0	1/0	1/0	1/0	1/0	1/0	1/0	1/0	1/0	1/0	1/0	1/0
NC_037338.1:22030137-22030265(-)	BosSINEL	48.59	51.41	516	546	0	516	15	5	1/0	1/0	1/0	1/0	1/0	1/0	1/0	1/0	1/0	1/0	1/0	1/0	1/0	1/0	1/0	1/0	1/0	1/0	1/0	1/0	1/0	1/0	1/0	1/0	1/0	1/0	1/0	1/0	1/0	1/0	1/0	1/0	1/0	1/0	1/0	1/0	1/0	1/0	1/0	1/0
NC_037338.1:22759830-22759939(+)	BosSINEL	62.64	37.36	659	393	140	379	7	10	1/1	1/1	1/1	1/0	1/0	1/0	1/1	1/0	1/0	1/0	1/0	1/0	1/1	1/0	1/0	1/0	1/0	1/0	1/0	1/0	1/1	1/0	1/0	1/0	1/0	1/0	1/0	1/0	1/0	1/0	1/0	1/0	1/0	1/0	1/0	1/0	1/0	1/0	1/0	1/0
NC_037338.1:23408478-23408751(+)	BosSINEL	50.09	49.91	532	530	6	520	5	5	1/0	1/0	1/0	1/0	1/0	1/0	1/0	1/0	1/0	1/0	1/0	1/0	1/0	1/0	1/0	1/0	1/0	1/0	1/0	1/0	1/0	1/0	1/0	1/0	1/0	1/0	1/0	1/0	1/0	1/0	1/0	1/0	1/0	1/0	1/0	1/0	1/0	1/0	1/0	1/0
NC_037338.1:23549293-23549567(+)	BosSINEL	70.58	29.42	751	313	219	313	0	4	1/0	1/0	1/1	1/1	1/1	1/0	1/0	1/0	1/0	1/0	1/1	1/0	1/1	1/1	1/0	1/0	1/0	1/0	1/0	1/0	1/0	1/0	1/0	1/1	1/0	1/0	1/0	1/0	1/0	1/0	1/1	1/0	1/1	1/1	1/0	1/0	1/0	1/0	1/0	1/0
NC_037338.1:23724062-23724318(+)	BosSINEL	89.58	10.42	946	110	420	106	2	8	1/1	1/1	1/1	1/1	1/0	1/1	1/1	1/1	1/0	1/0	1/1	1/1	1/0	1/1	1/1	1/0	1/0	1/1	1/1	1/0	1/1	1/0	1/1	1/1	1/0	1/1	1/1	1/0	1/1	1/0	1/1	1/1	1/1	1/1	1/0	1/1	1/1	1/0	1/1	1/1
NC_037338.1:24853405-24853672(+)	BosSINEL	71.51	28.49	748	298	228	292	3	13	1/0	1/1	1/0	1/0	1/1	1/1	1/0	1/1	1/0	1/1	1/1	1/0	1/1	1/1	1/1	1/0	1/1	1/0	1/1	1/0	1/0	1/1	1/1	1/0	1/0	1/1	1/0	1/0	1/1	1/0	1/1	1/0	1/0	1/0	1/0	1/1	1/1	1/1	1/1	1/1
NC_037338.1:26401979-26402256(+)	BosSINEL	49.35	50.65	529	543	0	529	7	0	1/0	1/0	1/0	1/0	1/0	1/0	1/0	1/0	1/0	1/0	1/0	1/0	1/0	1/0	1/0	1/0	1/0	1/0	1/0	1/0	1/0	1/0	1/0	1/0	1/0	1/0	1/0	1/0	1/0	1/0	1/0	1/0	1/0	1/0	1/0	1/0	1/0	1/0	1/0	1/0
NC_037338.1:26524570-26524837(-)	BosSINEL	49.06	50.94	524	544	0	524	10	2	1/0	1/0	1/0	1/0	1/0	1/0	1/0	1/0	1/0	1/0	1/0	1/0	1/0	1/0	1/0	1/0	1/0	1/0	1/0	1/0	1/0	1/0	1/0	1/0	1/0	1/0	1/0	1/0	1/0	1/0	1/0	1/0	1/0	1/0	1/0	1/0	1/0	1/0	1/0	1/0
NC_037338.1:26684037-26684155(-)	BosSINEL	49.91	50.09	529	531	5	519	6	6	1/0	1/0	1/0	1/0	1/0	1/0	1/0	1/0	1/0	1/0	1/0	1/0	1/0	1/0	1/0	1/0	1/0	1/0	1/0	1/0	1/0	1/0	1/0	1/0	1/0	1/0	1/0	1/0	1/0	1/0	1/0	1/0	1/0	1/0	1/0	1/0	1/0	1/0	1/0	1/0
NC_037338.1:26938099-26938373(+)	BosSINEL	48.78	51.22	521	547	0	521	13	2	1/0	1/0	1/0	1/0	1/0	1/0	1/0	1/0	1/0	1/0	1/0	1/0	1/0	1/0	1/0	1/0	1/0	1/0	1/0	1/0	1/0	1/0	1/0	1/0	1/0	1/0	1/0	1/0	1/0	1/0	1/0	1/0	1/0	1/0	1/0	1/0	1/0	1/0	1/0	1/0
NC_037338.1:27608063-27608336(-)	BosSINEL	83.46	16.54	883	175	356	171	2	7	1/1	1/1	1/1	1/0	1/1	1/1	1/1	1/0	1/1	1/1	1/0	1/1	1/1	1/1	1/1	1/0	1/1	1/1	1/1	1/1	1/1	1/1	1/1	1/1	1/1	1/1	1/1	1/1	1/1	1/0	1/1	1/0	1/0	1/1	1/1	1/0	1/0	1/1	1/1	1/1
NC_037338.1:28045977-28046044(+)	BosSINEL	60.87	39.13	644	414	121	402	6	7	1/0	1/0	1/0	1/0	1/1	1/0	1/1	1/0	1/1	1/0	1/0	1/1	1/0	1/0	1/0	1/1	1/0	1/0	1/0	1/0	1/0	1/0	1/0	1/0	1/0	1/0	1/0	1/0	1/0	1/0	1/0	1/0	1/0	1/0	1/1	1/1	1/1	1/0	1/0	1/0
NC_037338.1:28052014-28052289(-)	BosSINEL	49.53	50.47	526	536	0	526	5	5	1/0	1/0	1/0	1/0	1/0	1/0	1/0	1/0	1/0	1/0	1/0	1/0	1/0	1/0	1/0	1/0	1/0	1/0	1/0	1/0	1/0	1/0	1/0	1/0	1/0	1/0	1/0	1/0	1/0	1/0	1/0	1/0	1/0	1/0	1/0	1/0	1/0	1/0	1/0	1/0
NC_037338.1:28682877-28683151(-)	BosSINEL	82.76	17.24	869	181	347	175	3	11	1/1	1/1	1/0	1/1	1/1	1/1	1/0	1/0	1/0	1/1	1/0	1/0	1/0	1/0	1/0	1/1	1/1	1/1	1/0	1/1	1/0	1/1	1/1	1/1	1/1	1/0	1/1	1/0	1/1	1/0	1/1	1/1	1/1	1/1	1/1	1/1	1/1	1/1	1/0	1/0
NC_037338.1:29856555-29856687(-)	BosSINEL	47.75	52.25	510	558	1	508	25	2	1/0	1/0	1/0	1/0	1/0	1/0	1/0	1/0	1/0	1/0	1/0	1/0	1/0	1/0	1/0	1/0	1/0	1/0	1/0	1/0	1/0	1/0	1/0	1/0	1/0	1/0	1/0	1/0	1/0	1/0	1/0	1/0	1/0	1/0	1/0	1/0	1/0	1/0	1/0	1/0
NC_037338.1:30065355-30065625(-)	BosSINEL	49.91	50.09	530	532	5	520	6	5	1/0	1/0	1/0	1/0	1/0	1/0	1/0	1/0	1/0	1/0	1/0	1/0	1/0	1/0	1/0	1/0	1/0	1/0	1/0	1/0	1/0	1/0	1/0	1/0	1/0	1/0	1/0	1/0	1/0	1/0	1/0	1/0	1/0	1/0	1/0	1/0	1/0	1/0	1/0	1/0
NC_037338.1:30386396-30386526(-)	BosSINEL	49.62	50.38	527	535	0	527	4	5	1/0	1/0	1/0	1/0	1/0	1/0	1/0	1/0	1/0	1/0	1/0	1/0	1/0	1/0	1/0	1/0	1/0	1/0	1/0	1/0	1/0	1/0	1/0	1/0	1/0	1/0	1/0	1/0	1/0	1/0	1/0	1/0	1/0	1/0	1/0	1/0	1/0	1/0	1/0	1/0
NC_037338.1:30684930-30685185(-)	BosSINEL	49.16	50.84	527	545	0	527	9	0	1/0	1/0	1/0	1/0	1/0	1/0	1/0	1/0	1/0	1/0	1/0	1/0	1/0	1/0	1/0	1/0	1/0	1/0	1/0	1/0	1/0	1/0	1/0	1/0	1/0	1/0	1/0	1/0	1/0	1/0	1/0	1/0	1/0	1/0	1/0	1/0	1/0	1/0	1/0	1/0
NC_037338.1:31210447-31210724(-)	BosSINEL	73.63	26.37	779	279	250	279	0	7	1/0	1/1	1/0	1/0	1/0	1/0	1/0	1/0	1/1	1/1	1/0	1/0	1/0	1/0	1/0	1/0	1/0	1/1	1/0	1/0	1/0	1/1	1/0	1/1	1/1	1/0	1/1	1/1	1/1	1/1	1/1	1/0	1/1	1/0	1/1	1/0	1/1	1/1	1/1	1/0
NC_037338.1:31502866-31503142(-)	BosSINEL	60.61	39.39	640	416	119	402	7	8	1/0	1/0	1/0	1/0	1/0	1/0	1/0	1/1	1/0	1/0	1/0	1/0	1/0	1/0	1/0	1/0	1/0	1/1	1/0	1/0	1/0	1/0	1/1	1/0	1/0	1/0	1/0	1/0	1/0	1/0	1/1	1/0	1/0	1/0	1/0	1/1	1/0	1/0	1/0	1/0
NC_037338.1:31722836-31722959(-)	BosSINEL	57.28	42.72	606	452	80	446	3	7	1/1	1/0	1/0	1/0	1/0	1/0	1/0	1/0	1/0	1/0	1/0	1/1	1/0	1/0	1/0	1/0	1/0	1/0	1/0	1/0	1/0	1/0	1/0	1/0	1/0	1/0	1/0	1/0	1/0	1/0	1/0	1/0	1/0	1/1	1/0	1/0	1/0	1/0	1/0	1/0
NC_037338.1:31860895-31861005(+)	BosSINEL	85.1	14.9	897	157	370	157	0	9	1/0	1/0	1/1	1/0	1/0	1/0	1/1	1/1	1/1	1/1	1/1	1/1	1/1	1/1	1/1	1/1	1/0	1/1	1/0	1/0	1/1	1/1	1/1	1/1	1/1	1/1	1/1	1/1	1/1	1/1	1/1	1/1	1/1	1/1	1/1	1/1	1/1	1/1	1/1	1/1
NC_037338.1:32004322-32004553(+)	BosSINEL	49.62	50.38	526	534	4	518	8	6	1/0	1/0	1/0	1/0	1/0	1/0	1/0	1/0	1/0	1/0	1/0	1/0	1/0	1/0	1/0	1/0	1/0	1/0	1/0	1/0	1/0	1/0	1/0	1/0	1/0	1/0	1/0	1/0	1/0	1/0	1/0	1/0	1/0	1/0	1/0	1/0	1/0	1/0	1/0	1/0
NC_037338.1:32160183-32160286(+)	BosSINEL	56.7	43.3	601	459	73	455	2	6	1/0	1/0	1/0	1/0	1/0	0/0	1/0	1/1	1/0	1/0	1/0	1/0	1/0	1/0	1/0	1/0	1/0	1/1	1/0	1/0	1/0	1/0	1/0	1/0	1/0	1/0	1/0	1/0	1/0	1/0	1/0	1/0	1/0	1/1	1/0	1/0	1/0	1/0	1/1	1/1
NC_037338.1:32924568-32924698(+)	BosSINEL	77.02	22.98	801	239	323	155	42	16	1/1	1/1	1/1	1/0	1/1	1/1	1/0	1/0	1/0	1/1	1/1	1/1	1/0	1/1	1/1	1/1	1/0	1/1	1/1	1/0	1/0	1/1	1/1	1/0	1/1	1/1	1/0	1/1	1/1	1/1	1/0	1/1	1/1	1/0	1/0	1/0	1/1	1/0	0/0	1/1
NC_037338.1:33667984-33668260(+)	BosSINEL	50.19	49.81	528	524	17	494	15	10	1/0	1/0	1/0	1/0	1/0	1/0	1/0	1/0	1/0	1/0	1/0	1/0	1/0	1/0	1/0	1/0	1/0	1/0	1/0	1/0	1/0	1/0	1/0	1/0	1/0	1/0	1/0	1/0	1/0	1/0	1/0	1/0	1/0	1/0	1/0	1/0	1/0	1/0	1/0	1/0
NC_037338.1:33767452-33767725(+)	BosSINEL	49.72	50.28	528	534	1	526	4	5	1/0	1/0	1/0	1/0	1/0	1/0	1/0	1/0	1/0	1/0	1/0	1/0	1/0	1/0	1/0	1/0	1/0	1/0	1/0	1/0	1/0	1/0	1/0	1/0	1/0	1/0	1/0	1/0	1/0	1/0	1/0	1/0	1/0	1/0	1/0	1/0	1/0	1/0	1/0	1/0
NC_037338.1:35714540-35714616(+)	BosSINEL	56.43	43.57	597	461	71	455	3	7	1/0	1/0	1/0	1/0	1/0	1/0	1/0	1/0	1/0	1/0	1/1	1/0	1/0	1/0	1/0	1/0	1/0	1/1	1/1	1/1	1/0	1/0	1/0	1/0	1/0	1/0	1/0	1/0	1/0	1/0	1/0	1/0	1/0	1/0	1/0	1/0	1/0	1/0	1/0	1/0
NC_037338.1:36748561-36748834(-)	BosSINEL	49.53	50.47	525	535	1	523	6	6	1/0	1/0	1/0	1/0	1/0	1/0	1/0	1/0	1/0	1/0	1/0	1/0	1/0	1/0	1/0	1/0	1/0	1/0	1/0	1/0	1/0	1/0	1/0	1/0	1/0	1/0	1/0	1/0	1/0	1/0	1/0	1/0	1/0	1/0	1/0	1/0	1/0	1/0	1/0	1/0
NC_037338.1:37857766-37858038(+)	BosSINEL	83.56	16.44	854	168	352	150	9	25	1/0	1/1	1/1	1/0	1/1	1/0	1/1	0/0	1/1	NA	1/1	1/1	1/1	1/0	1/1	1/1	1/1	1/1	1/1	1/0	1/0	1/1	1/0	1/1	1/1	1/1	1/0	1/1	1/1	1/0	1/1	1/1	1/1	1/1	1/1	1/0	1/1	1/1	1/1	1/0
NC_037338.1:38415692-38415877(-)	BosSINEL	85.43	14.57	897	153	372	153	0	11	1/1	1/1	1/0	1/1	1/1	1/1	1/1	1/1	1/0	1/1	1/1	1/1	1/1	1/1	1/1	1/1	1/1	1/0	1/1	1/1	1/1	1/1	1/1	1/1	1/1	1/1	1/1	1/1	1/1	1/1	1/1	1/0	1/1	1/1	1/0	1/1	1/1	1/1	1/1	1/1
NC_037338.1:38555182-38555310(-)	BosSINEL	49.53	50.47	525	535	1	523	6	6	1/0	1/0	1/0	1/0	1/0	1/0	1/0	1/0	1/0	1/0	1/0	1/0	1/0	1/0	1/0	1/0	1/0	1/0	1/0	1/0	1/0	1/0	1/0	1/0	1/0	1/0	1/0	1/0	1/0	1/0	1/0	1/0	1/0	1/0	1/0	1/0	1/0	1/0	1/0	1/0
NC_037338.1:39312061-39312192(+)	BosSINEL	57.12	42.88	602	452	79	444	4	9	1/0	1/0	1/0	1/0	1/1	1/1	1/0	1/0	1/0	1/0	1/1	1/0	1/0	1/0	1/0	1/0	1/0	1/0	1/0	1/0	1/0	1/0	1/0	1/1	1/0	1/0	1/1	1/0	1/0	1/0	1/0	1/0	1/0	1/1	1/0	1/0	1/1	1/0	1/0	1/0
NC_037338.1:39453043-39453304(+)	BosSINEL	48.97	51.03	525	547	0	525	11	0	1/0	1/0	1/0	1/0	1/0	1/0	1/0	1/0	1/0	1/0	1/0	1/0	1/0	1/0	1/0	1/0	1/0	1/0	1/0	1/0	1/0	1/0	1/0	1/0	1/0	1/0	1/0	1/0	1/0	1/0	1/0	1/0	1/0	1/0	1/0	1/0	1/0	1/0	1/0	1/0
NC_037338.1:40086975-40087110(-)	BosSINEL	50.09	49.91	532	530	11	510	10	5	1/0	1/0	1/0	1/0	1/0	1/0	1/0	1/0	1/0	1/0	1/0	1/0	1/0	1/0	1/0	1/0	1/0	1/0	1/0	1/0	1/0	1/0	1/0	1/0	1/0	1/0	1/0	1/0	1/0	1/0	1/0	1/0	1/0	1/0	1/0	1/0	1/0	1/0	1/0	1/0
NC_037338.1:41231684-41231947(+)	BosSINEL	48.88	51.12	524	548	0	524	12	0	1/0	1/0	1/0	1/0	1/0	1/0	1/0	1/0	1/0	1/0	1/0	1/0	1/0	1/0	1/0	1/0	1/0	1/0	1/0	1/0	1/0	1/0	1/0	1/0	1/0	1/0	1/0	1/0	1/0	1/0	1/0	1/0	1/0	1/0	1/0	1/0	1/0	1/0	1/0	1/0
NC_037338.1:41497024-41497298(-)	BosSINEL	48.88	51.12	524	548	0	524	12	0	1/0	1/0	1/0	1/0	1/0	1/0	1/0	1/0	1/0	1/0	1/0	1/0	1/0	1/0	1/0	1/0	0/0	1/0	1/0	1/0	1/0	1/0	1/0	1/0	1/0	1/0	1/0	1/0	1/0	1/0	1/0	1/0	1/0	1/0	1/0	1/0	1/0	1/0	1/0	1/0
NC_037338.1:41691430-41691563(-)	BosSINEL	51.98	48.02	550	508	27	496	6	7	1/0	1/0	1/0	1/1	1/0	1/0	1/0	1/0	1/0	1/0	1/0	1/0	1/0	1/0	1/0	1/0	1/0	1/0	1/0	1/0	1/0	1/0	1/0	1/0	1/0	1/0	1/0	1/0	1/0	1/0	1/0	1/0	1/0	1/0	1/0	1/0	1/0	1/0	1/0	1/0
NC_037338.1:42067580-42067761(-)	BosSINEL	54.44	45.56	576	482	53	470	6	7	1/0	1/0	1/0	1/0	1/1	1/0	1/1	1/1	1/0	1/1	1/0	1/0	1/0	1/1	1/1	1/0	1/0	1/0	1/0	1/0	1/0	1/0	1/0	1/1	1/0	1/0	1/0	1/0	1/0	1/1	1/0	1/0	1/0	1/0	1/0	1/0	1/0	1/0	1/0	1/0
NC_037338.1:42075410-42075686(-)	BosSINEL	75.33	24.67	791	259	268	255	2	11	1/0	1/0	1/1	1/0	1/1	1/0	1/0	1/0	1/0	1/0	1/0	1/1	1/1	1/0	1/0	1/1	1/0	1/0	1/0	1/0	1/0	1/1	1/0	1/0	1/1	1/0	1/1	1/1	1/0	1/0	1/1	1/0	1/0	1/0	1/1	1/0	1/0	1/0	1/1	1/0
NC_037338.1:42367024-42367300(+)	BosSINEL	80.36	19.64	847	207	320	207	0	9	1/0	1/1	1/0	1/1	1/0	1/0	1/1	1/1	1/1	1/1	1/1	1/1	1/1	1/1	1/1	1/1	1/1	1/0	1/1	1/0	1/1	1/0	1/0	1/1	1/1	1/1	1/1	1/1	1/1	1/1	1/1	1/0	1/1	1/1	1/1	1/1	1/1	1/1	1/1	1/0
NC_037338.1:43043979-43044210(+)	BosSINEL	49.53	50.47	525	535	0	525	5	6	1/0	1/0	1/0	1/0	1/0	1/0	1/0	1/0	1/0	1/0	1/0	1/0	1/0	1/0	1/0	1/0	1/0	1/0	1/0	1/0	1/0	1/0	1/0	1/0	1/0	1/0	1/0	1/0	1/0	1/0	1/0	1/0	1/0	1/0	1/0	1/0	1/0	1/0	1/0	1/0
NC_037338.1:43712168-43712442(-)	BosSINEL	86.74	13.26	916	140	389	138	1	8	1/0	1/1	1/0	1/1	1/1	1/1	1/1	1/0	1/1	1/1	1/1	1/1	1/1	1/1	1/1	1/1	1/1	1/1	1/1	1/1	1/0	1/0	1/1	1/0	1/1	1/1	1/0	1/1	1/0	1/1	1/1	1/1	1/1	1/1	1/1	1/1	1/1	1/1	1/0	1/0
NC_037338.1:43819158-43819429(-)	BosSINEL	88.85	11.15	940	118	411	118	0	7	1/1	1/0	1/1	1/0	1/1	1/1	1/1	1/1	1/1	1/0	1/1	1/1	1/1	1/0	1/1	1/1	1/1	1/1	1/1	1/1	1/1	1/1	1/1	1/1	1/1	1/1	1/1	1/1	1/1	1/1	1/1	1/1	1/1	1/1	1/1	1/1	1/1	1/1	1/1	1/1
NC_037338.1:44118358-44118634(-)	BosSINEL	61.93	38.07	654	402	127	400	1	8	1/0	1/0	1/0	1/0	1/0	1/0	1/0	1/1	1/0	1/0	1/0	1/0	1/0	1/0	1/0	1/1	1/0	1/0	1/0	1/0	1/0	1/0	1/0	1/0	1/0	1/0	1/0	1/0	1/0	1/1	1/0	1/0	1/0	1/0	1/0	1/1	1/0	1/0	1/0	1/0
NC_037338.1:44385770-44385898(+)	BosSINEL	50	50	526	526	0	526	0	10	1/0	1/0	1/0	1/0	1/0	1/0	1/0	1/0	1/0	1/0	1/0	1/0	1/0	1/0	1/0	1/0	1/0	1/0	1/0	1/0	1/0	1/0	1/0	1/0	1/0	1/0	1/0	1/0	1/0	1/0	1/0	1/0	1/0	1/0	1/0	1/0	1/0	1/0	1/0	1/0
NC_037338.1:46100278-46100551(-)	BosSINEL	50.66	49.34	536	522	13	510	6	7	1/0	1/0	1/0	1/0	1/0	1/0	1/0	1/0	1/0	1/0	1/0	1/0	1/0	1/0	1/0	1/0	1/0	1/0	1/0	1/0	1/0	1/0	1/0	1/0	1/0	1/0	1/0	1/0	1/0	1/0	1/0	1/0	1/0	1/0	1/0	1/0	1/0	1/0	1/0	1/0
NC_037338.1:46115240-46115510(-)	BosSINEL	49.62	50.38	528	536	2	524	6	4	1/0	1/0	1/0	1/0	1/0	1/0	1/0	1/0	1/0	1/0	1/0	1/0	1/0	1/0	1/0	1/0	1/0	1/0	1/0	1/0	1/0	1/0	1/0	1/0	1/0	1/0	1/0	1/0	1/0	1/0	1/0	1/0	1/0	1/0	1/0	1/0	1/0	1/0	1/0	1/0
NC_037338.1:46306412-46306677(+)	BosSINEL	57.26	42.74	607	453	86	435	9	6	1/0	1/0	1/0	1/0	1/0	1/0	1/0	1/0	1/0	1/0	1/0	1/0	1/0	1/0	1/0	1/0	1/0	1/0	1/0	1/0	1/0	1/0	1/0	1/0	1/0	1/0	1/0	1/0	1/0	1/0	1/0	1/0	1/0	1/0	1/0	1/0	1/0	1/0	1/0	1/0
NC_037338.1:46623216-46623492(-)	BosSINEL	57.38	42.62	599	445	81	437	4	14	1/1	1/0	1/0	1/0	1/0	1/0	1/1	1/0	1/0	1/0	1/1	1/0	1/0	1/0	1/1	1/0	1/1	1/1	1/0	1/0	1/0	1/0	1/0	1/0	1/0	1/0	1/0	1/0	1/0	1/0	1/0	1/0	1/1	1/0	1/0	1/0	1/0	1/0	1/0	1/0
NC_037338.1:46820089-46820353(-)	BosSINEL	62.64	37.36	664	396	140	384	6	6	1/1	1/0	1/0	1/0	1/0	1/1	1/0	1/0	1/0	1/0	1/0	1/1	1/0	1/0	1/1	1/0	1/0	1/0	1/0	1/0	1/0	1/0	1/0	1/0	1/0	1/0	1/1	1/0	1/0	1/0	1/0	1/0	1/1	1/0	1/0	1/0	1/1	1/0	1/0	1/1
NC_037338.1:46841023-46841297(-)	BosSINEL	82.24	17.76	852	184	339	174	5	18	1/1	1/0	1/0	1/0	1/1	1/1	1/1	1/0	1/0	1/1	1/1	1/0	1/0	1/0	1/1	1/0	1/1	1/0	1/1	1/0	1/0	1/1	1/1	1/1	1/0	1/1	1/1	1/0	1/1	1/0	1/0	1/0	1/1	1/1	1/1	1/0	1/1	1/0	1/1	1/1
NC_037338.1:47212420-47212667(+)	BosSINEL	30.53	69.47	323	735	3	317	209	7	1/0	0/0	0/0	1/0	1/0	0/0	0/0	1/0	1/0	0/0	0/0	1/0	1/0	0/0	1/0	1/0	1/0	1/0	1/0	1/0	1/0	0/0	1/0	0/0	1/0	1/0	1/0	0/0	0/0	0/0	1/0	0/0	1/0	1/0	0/0	1/0	0/0	1/0	1/0	1/0
NC_037338.1:47220676-47220812(+)	BosSINEL	54.47	45.53	573	479	61	451	14	10	1/0	1/0	1/0	1/0	1/1	1/1	1/0	1/0	1/0	1/0	1/0	1/0	1/1	1/0	1/0	1/0	1/0	1/0	1/0	1/0	1/0	1/0	1/0	1/0	1/0	1/0	1/1	1/0	1/0	1/0	1/1	1/0	1/0	1/0	1/0	1/0	1/0	1/0	1/0	1/0
NC_037338.1:47228661-47228805(+)	BosSINEL	49.43	50.57	524	536	0	524	6	6	1/0	1/0	1/0	1/0	1/0	1/0	1/0	1/0	1/0	1/0	1/0	1/0	1/0	1/0	1/0	1/0	1/0	1/0	1/0	1/0	1/0	1/0	1/0	1/0	1/0	1/0	1/0	1/0	1/0	1/0	1/0	1/0	1/0	1/0	1/0	1/0	1/0	1/0	1/0	1/0
NC_037338.1:47345061-47345324(+)	BosSINEL	49.44	50.56	527	539	1	525	7	3	1/0	1/0	1/0	1/0	1/0	1/0	1/0	1/0	1/0	1/0	1/0	1/0	1/0	1/0	1/0	1/0	1/0	1/0	1/0	1/0	1/0	1/0	1/0	1/0	1/0	1/0	1/0	1/0	1/0	1/0	1/0	1/0	1/0	1/0	1/0	1/0	1/0	1/0	1/0	1/0
NC_037338.1:47396173-47396466(-)	BosSINEL	49.34	50.66	526	540	2	522	9	3	1/0	1/0	1/0	1/0	1/0	1/0	1/0	1/0	1/0	1/0	1/0	1/0	1/0	1/0	1/0	1/0	1/0	1/0	1/0	1/0	1/0	1/0	1/0	1/0	1/0	1/0	1/0	1/0	1/0	1/0	1/0	1/0	1/0	1/0	1/0	1/0	1/0	1/0	1/0	1/0
NC_037338.1:47899513-47899763(+)	BosSINEL	48.97	51.03	523	545	0	523	11	2	1/0	1/0	1/0	1/0	1/0	1/0	1/0	1/0	1/0	1/0	1/0	1/0	1/0	1/0	1/0	1/0	1/0	1/0	1/0	1/0	1/0	1/0	1/0	1/0	1/0	1/0	1/0	1/0	1/0	1/0	1/0	1/0	1/0	1/0	1/0	1/0	1/0	1/0	1/0	1/0
NC_037338.1:49223972-49224235(-)	BosSINEL	58.56	41.44	602	426	98	406	10	22	1/0	NA	1/0	1/0	1/1	1/0	1/0	1/1	1/0	1/0	1/0	1/0	1/0	1/0	1/0	1/0	1/0	1/0	1/0	1/0	1/0	0/0	1/0	1/0	1/0	1/0	1/0	1/0	1/0	1/0	1/0	1/1	1/0	1/0	1/0	1/0	1/0	1/0	1/0	1/0
NC_037338.1:49275770-49276046(-)	BosSINEL	49.91	50.09	528	530	7	514	8	7	1/0	1/0	1/0	1/0	1/0	1/0	1/0	1/0	1/0	1/0	1/0	1/0	1/0	1/0	1/0	1/0	1/0	1/0	1/0	1/0	1/0	1/0	1/0	1/0	1/0	1/0	1/0	1/0	1/0	1/0	1/0	1/0	1/0	1/0	1/0	1/0	1/0	1/0	1/0	1/0
NC_037338.1:49916635-49916910(+)	BosSINEL	48.5	51.5	518	550	0	518	16	2	1/0	1/0	1/0	1/0	1/0	1/0	1/0	1/0	1/0	1/0	1/0	1/0	1/0	1/0	1/0	1/0	1/0	1/0	1/0	1/0	1/0	1/0	1/0	1/0	1/0	1/0	1/0	1/0	1/0	1/0	1/0	1/0	1/0	1/0	1/0	1/0	1/0	1/0	1/0	1/0
NC_037338.1:50062929-50063204(+)	BosSINEL	49.44	50.56	528	540	2	524	8	2	1/0	1/0	1/0	1/0	1/0	1/0	1/0	1/0	1/0	1/0	1/0	0/0	1/0	1/0	1/0	1/0	1/0	1/0	1/0	1/0	1/0	1/0	1/0	1/0	1/0	1/0	1/0	1/0	1/0	1/0	1/0	1/0	1/0	1/0	1/0	1/0	1/0	1/0	1/0	1/0
NC_037338.1:51246914-51247182(-)	BosSINEL	48.79	51.21	523	549	1	521	14	0	1/0	1/0	1/0	1/0	1/0	1/0	1/0	1/0	1/0	1/0	1/0	1/0	1/0	1/0	1/0	1/0	1/0	1/0	1/0	1/0	1/0	1/0	1/0	1/0	1/0	1/0	1/0	1/0	1/0	1/0	1/0	1/0	1/0	1/0	1/0	1/0	1/0	1/0	1/0	1/0
NC_037338.1:51532621-51532895(+)	BosSINEL	84.99	15.01	855	151	359	137	7	33	1/1	1/0	1/1	1/1	1/0	1/1	1/1	1/1	1/1	1/1	1/1	1/1	1/0	1/1	1/1	1/1	1/1	1/0	1/0	1/1	1/0	1/1	1/1	1/1	1/1	1/0	1/0	1/0	1/1	1/1	1/1	1/1	1/1	1/1	1/1	1/1	1/1	1/1	1/0	1/1
NC_037338.1:51761030-51761304(+)	BosSINEL	81.19	18.81	859	199	333	193	3	7	1/1	1/1	1/1	1/1	1/0	1/1	1/1	1/0	1/0	1/0	1/0	1/0	1/1	1/0	1/0	1/1	1/0	1/0	1/1	1/0	1/1	1/1	1/1	1/1	1/1	1/0	1/0	1/1	1/0	1/0	1/0	1/1	1/0	1/0	1/0	1/0	1/0	1/0	1/0	1/1
NC_037338.1:51847487-51847752(+)	BosSINEL	79.79	20.21	833	211	312	209	1	14	1/1	1/1	1/0	1/0	1/1	1/1	NA	1/1	1/1	1/0	1/0	1/0	1/0	1/1	1/1	1/1	1/1	1/0	1/1	1/1	1/1	1/1	1/1	1/0	1/0	1/0	1/1	1/0	1/0	1/0	1/1	1/1	1/1	1/1	1/1	1/1	1/1	1/1	1/0	1/1
NC_037338.1:52629997-52630269(+)	BosSINEL	50.09	49.91	530	528	6	518	5	7	1/0	1/0	1/0	1/0	1/0	1/0	1/0	1/0	1/0	1/0	1/0	1/0	1/0	1/0	1/0	1/0	1/0	1/0	1/0	1/0	1/0	1/0	1/0	1/0	1/0	1/0	1/0	1/0	1/0	1/0	1/0	1/0	1/0	1/0	1/0	1/0	1/0	1/0	1/0	1/0
NC_037338.1:52716993-52717131(-)	BosSINEL	71.55	28.45	737	293	232	273	10	21	0/0	1/0	1/0	1/1	1/1	1/0	1/1	1/0	1/0	1/0	1/0	0/0	1/1	1/1	NA	1/0	1/1	1/1	1/1	1/1	1/1	1/0	1/1	1/0	1/0	1/0	1/1	1/0	1/1	1/0	1/1	1/0	NA	1/1	1/1	1/0	1/1	1/0	1/1	1/1
NC_037338.1:52732586-52732711(+)	BosSINEL	49.44	50.56	530	542	0	530	6	0	1/0	1/0	1/0	1/0	1/0	1/0	1/0	1/0	1/0	1/0	1/0	1/0	1/0	1/0	1/0	1/0	1/0	1/0	1/0	1/0	1/0	1/0	1/0	1/0	1/0	1/0	1/0	1/0	1/0	1/0	1/0	1/0	1/0	1/0	1/0	1/0	1/0	1/0	1/0	1/0
NC_037338.1:53621763-53622010(-)	BosSINEL	49.72	50.28	530	536	5	520	8	3	1/0	1/0	1/0	1/0	1/0	1/0	1/0	1/0	1/0	1/0	1/0	1/0	1/0	1/0	1/0	1/0	1/0	1/0	1/0	1/0	1/0	1/0	1/0	1/0	1/0	1/0	1/0	1/0	1/0	1/0	1/0	1/0	1/0	1/0	1/0	1/0	1/0	1/0	1/0	1/0
NC_037338.1:53995439-53995715(+)	BosSINEL	49.53	50.47	529	539	7	515	12	2	1/0	1/0	1/0	1/0	1/0	1/0	1/0	1/0	1/0	1/0	1/0	1/0	1/0	1/0	1/0	1/0	1/0	1/0	1/0	1/0	1/0	1/0	1/0	1/0	1/0	1/0	1/0	1/0	1/0	1/0	1/0	1/0	1/0	1/0	1/0	1/0	1/0	1/0	1/0	1/0
NC_037338.1:54265780-54265871(+)	BosSINEL	59.52	40.48	625	425	104	417	4	11	1/0	1/0	1/0	1/0	1/0	1/0	1/1	1/0	1/0	1/0	1/1	1/0	1/0	1/1	1/0	1/0	1/0	1/1	1/0	1/0	1/1	1/0	1/0	1/0	1/0	1/0	1/0	1/0	1/1	1/0	1/0	1/0	1/1	1/0	1/0	1/0	1/0	1/0	1/1	1/0
NC_037338.1:54995962-54996238(-)	BosSINEL	65.58	34.42	686	360	165	356	2	13	1/1	1/0	1/0	1/0	1/0	1/1	1/0	1/0	1/1	1/1	1/0	1/0	1/0	1/0	1/1	1/1	1/0	1/0	1/0	1/0	1/1	1/0	1/1	1/1	1/1	1/0	1/0	1/0	1/0	1/1	1/0	1/0	1/0	1/0	1/1	1/0	1/0	1/0	1/1	1/1
NC_037338.1:55259986-55260261(-)	BosSINEL	62.81	37.19	662	392	150	362	15	9	1/1	1/1	1/0	1/1	1/0	1/0	1/0	1/0	1/0	1/0	1/0	1/0	1/0	1/0	1/0	1/0	1/0	1/0	1/0	1/1	1/0	1/1	1/0	1/0	1/0	1/0	1/0	1/0	1/0	1/0	1/0	1/0	1/0	1/0	1/0	1/0	1/0	1/0	1/0	1/0
NC_037338.1:56118812-56119086(+)	BosSINEL	55.58	44.42	588	470	64	460	5	7	1/0	1/0	1/0	1/0	1/1	1/1	1/0	1/0	1/0	1/0	1/0	1/0	1/0	1/0	1/0	1/1	1/0	1/0	1/0	1/0	1/0	1/0	1/0	1/0	1/1	1/0	1/0	1/0	1/0	1/0	1/0	1/0	1/0	1/0	1/0	1/0	1/0	1/0	1/0	1/0
NC_037338.1:56143507-56143766(-)	BosSINEL	49.43	50.57	524	536	0	524	6	6	1/0	1/0	1/0	1/0	1/0	1/0	1/0	1/0	1/0	1/0	1/0	1/0	1/0	1/0	1/0	1/0	1/0	1/0	1/0	1/0	1/0	1/0	1/0	1/0	1/0	1/0	1/0	1/0	1/0	1/0	1/0	1/0	1/0	1/0	1/0	1/0	1/0	1/0	1/0	1/0
NC_037338.1:56654807-56655083(+)	BosSINEL	47.37	52.63	504	560	3	498	31	4	1/0	1/0	1/0	1/0	1/0	1/0	1/0	1/0	1/0	1/0	1/0	1/0	1/0	1/0	1/0	1/0	1/0	1/0	1/0	1/0	1/0	1/0	1/0	1/0	1/0	1/0	1/0	1/0	1/0	1/0	1/0	1/0	1/0	1/0	1/0	1/0	1/0	1/0	1/0	1/0
NC_037338.1:57677694-57677952(+)	BosSINEL	49.81	50.19	530	534	5	520	7	4	1/0	1/0	1/0	1/0	1/0	1/0	1/0	1/0	1/0	1/0	1/0	1/0	1/0	1/0	1/0	1/0	1/0	1/0	1/0	1/0	1/0	1/0	1/0	1/0	1/0	1/0	1/0	1/0	1/0	1/0	1/0	1/0	1/0	1/0	1/0	1/0	1/0	1/0	1/0	1/0
NC_037338.1:58074115-58074390(+)	BosSINEL	56.19	43.81	590	460	68	454	3	11	1/0	1/0	1/0	1/0	1/0	1/0	1/0	1/0	1/0	1/1	1/1	1/0	1/1	1/0	1/0	1/0	1/0	1/0	1/0	1/0	1/0	1/0	1/0	1/0	1/0	1/0	1/0	1/1	1/0	1/0	1/0	1/1	1/0	1/1	1/0	1/0	1/0	1/0	1/0	1/1
NC_037338.1:58245302-58245381(-)	BosSINEL	66.79	33.21	704	350	184	336	7	9	1/1	1/1	1/1	1/1	1/0	1/0	1/0	1/0	1/0	1/0	1/0	1/0	1/0	1/0	1/0	1/0	1/0	1/0	1/0	1/0	1/0	1/0	1/0	1/0	1/0	1/0	1/0	1/0	1/0	1/0	1/0	1/0	1/0	1/0	1/0	1/0	1/0	1/0	1/0	1/0
NC_037338.1:59214052-59214323(+)	BosSINEL	64.62	35.38	685	375	156	373	1	6	1/0	1/0	1/1	1/0	1/0	1/0	1/0	1/0	1/1	1/0	1/0	1/0	1/0	1/1	1/0	1/0	1/0	1/0	1/0	1/0	1/0	1/0	1/0	1/0	1/0	1/1	1/0	1/0	1/0	1/0	1/0	1/0	1/0	1/0	1/0	1/0	1/0	1/0	1/0	1/0
NC_037338.1:59481154-59481430(+)	BosSINEL	57.16	42.84	607	455	80	447	4	5	1/0	1/1	1/0	1/1	1/0	1/0	1/0	1/0	1/0	1/0	1/0	1/0	1/0	1/0	1/0	1/0	1/0	1/0	1/0	1/0	1/0	1/0	1/0	1/0	1/0	1/0	1/0	1/0	1/0	1/0	1/0	1/0	1/0	1/0	1/0	1/0	1/0	1/0	1/0	1/0
NC_037338.1:59776188-59776462(-)	BosSINEL	75.95	24.05	799	253	275	249	2	10	1/1	1/1	1/1	1/0	1/0	1/0	1/0	1/0	1/1	1/0	1/0	1/0	1/0	1/0	1/0	1/1	1/0	1/0	1/1	1/0	1/1	1/0	1/1	1/0	1/0	1/0	1/1	1/1	1/0	1/0	1/1	1/1	1/0	1/0	1/1	1/1	1/0	1/0	1/0	1/0
NC_037338.1:60316977-60317250(-)	BosSINEL	50.76	49.24	537	521	12	513	4	7	1/0	1/0	1/0	1/0	1/0	1/0	1/0	1/0	1/0	1/0	1/0	1/0	1/0	1/0	1/0	1/0	1/0	1/0	1/0	1/0	1/0	1/0	1/0	1/0	1/0	1/0	1/0	1/0	1/0	1/0	1/0	1/0	1/0	1/0	1/0	1/0	1/0	1/0	1/0	1/0
NC_037338.1:60639695-60639970(+)	BosSINEL	58.32	41.68	617	441	90	437	2	7	1/0	1/0	1/0	1/0	1/1	1/0	1/1	1/1	1/0	1/1	1/0	1/0	1/0	1/1	1/0	1/0	1/0	1/0	1/0	1/0	1/0	1/0	1/0	1/0	1/0	1/1	1/0	1/0	1/0	1/1	1/0	1/1	1/0	1/0	1/0	1/0	1/0	1/0	1/0	1/0
NC_037338.1:62102784-62103059(+)	BosSINEL	53.88	46.12	569	487	45	479	4	8	1/0	1/0	1/0	1/0	1/0	1/0	1/0	1/0	1/0	1/0	1/0	1/0	1/0	1/0	1/0	1/0	1/1	1/0	1/0	1/0	1/0	1/0	1/0	1/0	1/1	1/0	1/0	1/0	1/0	1/0	1/0	1/0	1/0	1/0	1/0	1/0	1/0	1/0	1/0	1/0
NC_037338.1:62384919-62385193(-)	BosSINEL	49.25	50.75	528	544	0	528	8	0	1/0	1/0	1/0	1/0	1/0	1/0	1/0	1/0	1/0	1/0	1/0	1/0	1/0	1/0	1/0	1/0	1/0	1/0	1/0	1/0	1/0	1/0	1/0	1/0	1/0	1/0	1/0	1/0	1/0	1/0	1/0	1/0	1/0	1/0	1/0	1/0	1/0	1/0	1/0	1/0
NC_037338.1:64009790-64010065(-)	BosSINEL	88.57	11.43	930	120	405	120	0	11	1/0	1/0	1/1	1/0	1/1	1/1	1/1	1/1	1/1	1/1	1/1	1/1	1/1	1/1	1/1	1/1	1/1	1/1	1/1	1/1	1/1	1/1	1/1	1/0	1/1	1/1	1/1	1/1	1/1	1/1	1/1	1/1	1/1	1/1	1/1	1/1	1/1	1/1	1/1	1/1
NC_037338.1:64153637-64153913(+)	BosSINEL	68.25	31.75	718	334	195	328	3	10	1/1	1/0	1/1	1/0	1/0	1/0	1/0	1/0	1/0	1/0	1/1	1/0	1/0	1/0	1/0	1/0	1/0	1/0	1/0	1/0	1/1	1/0	1/0	1/0	1/0	1/0	1/0	1/0	1/0	1/0	1/1	1/0	1/0	1/0	1/0	1/0	1/1	1/0	1/0	1/0
NC_037338.1:64288750-64289020(+)	BosSINEL	55.66	44.34	590	470	67	456	7	6	1/0	1/0	1/0	1/0	1/1	1/0	1/0	1/0	1/0	1/0	1/0	1/0	1/0	1/1	1/0	1/1	1/0	1/0	1/0	1/0	1/0	1/1	1/1	1/0	1/0	1/0	1/0	1/1	1/1	1/0	1/0	1/0	1/0	1/0	1/0	1/0	1/0	1/1	1/0	1/0
NC_037338.1:65092022-65092268(+)	BosSINEL	85.48	14.52	901	153	376	149	2	9	1/1	1/1	1/1	1/1	1/1	1/1	1/1	1/1	1/0	1/0	1/0	1/1	1/0	1/1	1/0	1/0	1/0	1/1	1/1	1/1	1/1	1/0	1/1	1/1	1/1	1/1	1/1	1/1	1/1	1/1	1/0	1/0	1/0	1/1	1/1	1/0	1/1	1/1	1/0	1/1
NC_037338.1:66183139-66183414(+)	BosSINEL	80.81	19.19	855	203	327	201	1	7	1/1	1/1	1/1	1/1	1/0	1/1	1/1	1/0	1/1	1/0	1/0	1/1	1/0	1/0	1/0	1/0	1/0	1/1	1/0	1/1	1/0	1/0	1/0	1/1	1/1	1/1	1/1	1/1	1/0	1/0	1/0	1/0	1/1	1/1	1/0	1/0	1/0	1/0	1/1	1/0
NC_037338.1:66237007-66237283(+)	BosSINEL	61.55	38.45	650	406	127	396	5	8	1/0	1/0	1/1	1/0	1/1	1/0	1/0	1/0	1/0	1/0	1/0	1/1	1/0	1/0	1/0	1/1	1/1	1/1	1/0	1/0	1/1	1/0	1/0	1/1	1/1	1/1	1/0	1/0	1/1	1/0	1/0	1/0	1/0	1/0	1/0	1/0	1/0	1/0	1/0	1/0
NC_037338.1:66356555-66356783(-)	BosSINEL	49.34	50.66	523	537	7	509	14	6	1/0	1/0	1/0	1/0	1/0	1/0	1/0	1/0	1/0	1/0	1/0	1/0	1/0	1/0	1/0	1/0	1/0	1/0	1/0	1/0	1/0	1/0	1/0	1/0	1/0	1/0	1/0	1/0	1/0	1/0	1/0	1/0	1/0	1/0	1/0	1/0	1/0	1/0	1/0	1/0
NC_037338.1:69064113-69064246(+)	BosSINEL	49.25	50.75	522	538	1	520	9	6	1/0	1/0	1/0	1/0	1/0	1/0	1/0	1/0	1/0	1/0	1/0	1/0	1/0	1/0	1/0	1/0	1/0	1/0	0/0	1/0	1/0	1/0	1/0	1/0	1/0	1/0	1/0	1/0	1/0	1/0	1/0	1/0	1/0	1/0	1/0	1/0	1/0	1/0	1/0	1/0
NC_037338.1:69080651-69080897(-)	BosSINEL	71.52	28.48	751	299	235	281	9	11	1/1	1/1	1/0	1/1	1/0	1/0	1/1	1/0	1/0	1/1	1/1	1/0	1/0	1/1	1/0	1/0	1/0	1/0	1/0	1/0	1/0	1/1	1/0	1/0	1/0	1/0	1/0	1/0	1/0	1/0	1/0	1/0	1/0	1/0	1/1	1/0	1/0	1/0	1/0	1/0
NC_037338.1:69183917-69184190(+)	BosSINEL	60.13	39.87	635	421	114	407	7	8	1/0	1/0	1/0	1/0	1/0	1/1	1/1	1/1	1/1	1/0	1/0	1/1	1/1	1/0	1/0	1/0	1/0	1/0	1/0	1/0	1/0	1/1	1/1	1/1	1/1	1/0	1/0	1/0	1/1	1/0	1/0	1/1	1/0	1/0	1/0	1/0	1/1	1/0	1/0	1/1
NC_037338.1:71510647-71510858(-)	BosSINEL	64.82	35.18	678	368	155	368	0	13	1/0	1/1	1/0	1/0	1/1	1/0	1/1	1/0	1/0	1/0	1/1	1/1	1/0	1/1	1/0	1/1	1/0	1/0	1/0	1/0	1/0	1/0	1/1	1/0	1/1	1/1	1/1	1/0	1/0	1/0	1/0	1/0	1/0	1/0	1/0	1/0	1/1	1/1	1/0	1/0
NC_037338.1:72126834-72127109(+)	BosSINEL	78.77	21.23	835	225	305	225	0	6	1/1	1/1	1/1	1/1	1/1	1/1	1/1	1/1	1/0	1/1	1/1	1/0	1/1	1/1	1/1	1/1	1/1	1/1	1/0	1/0	1/0	1/0	1/1	1/0	1/1	1/0	1/1	1/1	1/1	1/1	1/0	1/1	1/1	1/1	1/1	1/1	1/1	1/1	1/0	1/1
NC_037338.1:75132303-75132364(+)	BosSINEL	88.45	11.55	927	121	404	119	1	12	1/1	1/1	1/1	1/1	1/1	1/0	1/0	1/1	1/1	1/0	1/0	1/1	1/1	1/1	1/1	1/1	1/1	1/0	1/1	1/1	1/1	1/0	1/1	1/1	1/1	1/1	1/0	1/1	1/0	1/0	1/1	1/0	1/1	1/0	1/0	1/0	1/0	1/0	1/0	1/1
NC_037338.1:75805995-75806273(+)	BosSINEL	70.7	29.3	748	310	221	306	2	7	1/0	1/0	1/0	1/1	1/0	1/0	1/1	1/0	1/1	1/1	1/1	1/0	1/1	1/0	1/1	1/1	1/0	1/1	1/1	1/0	1/0	1/1	1/0	1/1	1/0	1/0	1/1	1/0	1/0	1/1	1/0	1/0	1/1	1/0	1/0	1/0	1/1	1/0	1/0	1/0
NC_037338.1:75823809-75823941(+)	BosSINEL	67.93	32.07	716	338	192	332	3	9	1/0	1/0	1/1	1/0	1/1	1/0	1/0	1/0	1/0	1/1	1/0	1/1	1/0	1/0	1/1	1/0	1/1	1/0	1/0	1/0	1/1	1/0	1/1	1/0	1/1	1/0	1/1	1/0	1/1	1/0	1/0	1/0	1/1	1/0	1/0	1/0	1/0	1/0	1/0	1/0
NC_037338.1:76143791-76144070(+)	BosSINEL	84.35	15.65	884	164	363	158	3	12	1/1	1/1	1/0	1/1	1/1	1/1	1/1	1/1	1/1	1/1	1/1	1/1	1/1	1/0	1/1	1/1	1/0	1/1	1/0	1/1	1/0	1/1	1/0	1/0	1/1	1/1	1/0	1/1	1/1	1/0	1/1	1/0	1/1	1/0	1/1	1/0	1/1	1/0	1/1	1/1
NC_037338.1:76736944-76737201(-)	BosSINEL	76.33	23.67	803	249	280	243	3	10	1/0	1/0	1/0	1/0	1/1	1/1	1/0	1/1	1/1	1/1	1/1	1/1	1/1	1/0	1/1	1/0	1/1	1/0	1/0	1/1	1/1	1/0	1/0	1/1	1/0	1/1	1/1	1/1	1/1	1/1	1/0	1/1	1/1	1/0	1/0	1/0	1/0	1/0	1/0	1/0
NC_037338.1:77216708-77216967(+)	BosSINEL	89.27	10.73	932	112	411	110	1	14	1/0	1/0	1/1	1/0	1/1	1/1	1/1	1/1	1/1	1/1	1/1	1/1	1/1	1/1	1/1	1/1	1/1	1/1	1/1	1/1	1/1	1/1	1/1	1/1	1/1	1/1	1/1	1/1	1/1	1/1	1/1	1/1	1/1	1/1	1/1	1/1	1/1	1/1	1/1	1/1
NC_037338.1:78772792-78772964(+)	BosSINEL	50.75	49.25	539	523	15	509	7	5	1/0	1/0	1/0	1/0	1/0	1/0	1/0	1/0	1/0	1/0	1/0	1/0	1/0	1/0	1/0	1/0	1/0	1/0	1/0	1/0	1/0	1/0	1/0	1/0	1/0	1/0	1/0	1/0	1/0	1/0	1/0	1/0	1/0	1/0	1/0	1/0	1/0	1/0	1/0	1/0
NC_037338.1:79699010-79699285(+)	BosSINEL	49.63	50.37	530	538	2	526	6	2	1/0	1/0	1/0	1/0	1/0	1/0	1/0	1/0	1/0	1/0	1/0	1/0	1/0	1/0	1/0	1/0	1/0	1/0	1/0	1/0	1/0	1/0	1/0	1/0	1/0	1/0	1/0	1/0	1/0	1/0	1/0	1/0	1/0	1/0	1/0	1/0	1/0	1/0	1/0	1/0
NC_037338.1:81565181-81565456(-)	BosSINEL	78.02	21.98	827	233	300	227	3	6	1/1	1/1	1/1	1/0	1/1	1/1	1/1	1/1	1/1	1/1	1/1	1/1	1/1	1/1	1/1	1/1	1/0	1/1	1/0	1/1	1/0	1/0	1/0	1/0	1/0	1/1	1/0	1/1	1/1	1/1	1/1	1/0	1/1	1/1	1/1	1/1	1/1	1/1	1/1	1/0
NC_037338.1:81779942-81780204(-)	BosSINEL	49.63	50.37	530	538	0	530	4	2	1/0	1/0	1/0	1/0	1/0	1/0	1/0	1/0	1/0	1/0	1/0	1/0	1/0	1/0	1/0	1/0	1/0	1/0	1/0	1/0	1/0	1/0	1/0	1/0	1/0	1/0	1/0	1/0	1/0	1/0	1/0	1/0	1/0	1/0	1/0	1/0	1/0	1/0	1/0	1/0
NC_037338.1:83576676-83576961(-)	BosSINEL	54.62	45.38	579	481	58	463	9	6	1/0	1/0	1/0	1/0	1/0	1/0	1/0	1/0	1/0	1/0	1/0	1/0	1/0	1/0	1/0	1/0	1/0	1/0	1/0	1/0	1/0	1/0	1/0	1/0	1/0	1/0	1/0	1/0	1/0	1/0	1/0	1/0	1/0	1/0	1/0	1/0	1/0	1/0	1/0	1/0
NC_037338.1:84192305-84192435(+)	BosSINEL	81.73	18.27	850	190	330	190	0	16	1/1	1/1	1/0	1/1	1/0	1/1	1/1	1/0	1/0	1/1	1/1	1/0	1/0	1/1	1/1	1/0	1/1	1/1	1/1	1/1	1/0	1/0	1/0	1/0	1/0	1/1	1/1	1/0	1/0	1/1	1/0	1/0	1/1	1/1	1/0	1/0	1/0	1/1	1/0	1/1
NC_037338.1:85990833-85991102(-)	BosSINEL	87.07	12.93	909	135	387	135	0	14	1/0	1/1	1/1	1/1	1/1	1/1	1/0	1/1	1/1	1/0	1/1	1/1	1/1	1/1	1/1	1/0	1/0	1/0	1/1	1/0	1/1	1/1	1/1	1/1	1/1	1/0	1/1	1/0	1/1	1/1	1/1	1/1	1/1	1/1	1/1	1/0	1/1	1/0	1/1	1/1
NC_037338.1:86431801-86432075(-)	BosSINEL	53.48	46.52	569	495	48	473	11	4	1/0	1/0	1/0	1/0	1/0	1/0	1/1	1/0	1/0	1/0	1/0	1/0	1/0	1/1	1/0	1/1	1/0	1/0	1/0	1/0	1/0	1/0	1/0	1/0	1/0	1/0	1/0	1/0	1/0	1/0	1/0	1/0	1/0	1/0	1/0	1/0	1/0	1/0	1/0	1/0
NC_037338.1:87651468-87651718(+)	BosSINEL	49.07	50.93	526	546	0	526	10	0	1/0	1/0	1/0	1/0	1/0	1/0	1/0	1/0	1/0	1/0	1/0	1/0	1/0	1/0	1/0	1/0	1/0	1/0	1/0	1/0	1/0	1/0	1/0	1/0	1/0	1/0	1/0	1/0	1/0	1/0	1/0	1/0	1/0	1/0	1/0	1/0	1/0	1/0	1/0	1/0
NC_037338.1:88483782-88484056(+)	BosSINEL	49.62	50.38	526	534	2	522	6	6	1/0	1/0	1/0	1/0	1/0	1/0	1/0	1/0	1/0	1/0	1/0	1/0	1/0	1/0	1/0	1/0	1/0	1/0	1/0	1/0	1/0	1/0	1/0	1/0	1/0	1/0	1/0	1/0	1/0	1/0	1/0	1/0	1/0	1/0	1/0	1/0	1/0	1/0	1/0	1/0
NC_037338.1:88762659-88762852(+)	BosSINEL	75.43	24.57	786	256	271	244	6	15	1/0	1/1	1/0	1/0	1/1	1/1	1/0	1/0	1/1	1/0	1/1	1/0	1/0	1/0	1/0	1/1	1/0	1/0	1/0	1/1	1/0	1/0	1/0	1/1	1/1	1/1	1/1	1/0	1/0	1/1	1/1	1/1	1/0	1/0	1/0	1/0	1/1	1/1	1/0	1/1
NC_037338.1:90000642-90000918(-)	BosSINEL	61.76	38.24	651	403	128	395	4	9	1/1	1/1	1/0	1/0	1/0	1/0	1/0	1/1	1/0	1/0	1/0	1/0	1/0	1/0	1/1	1/0	1/0	1/0	1/1	1/0	1/0	1/0	1/1	1/0	1/1	1/0	1/0	1/0	1/0	1/0	1/0	1/0	1/0	1/0	1/0	1/1	1/0	1/0	1/0	1/0
NC_037338.1:90631559-90631834(+)	BosSINEL	48.87	51.13	521	545	0	521	12	3	1/0	1/0	1/0	1/0	1/0	1/0	1/0	1/0	1/0	1/0	1/0	1/0	1/0	1/0	1/0	1/0	1/0	1/0	1/0	1/0	1/0	1/0	1/0	1/0	1/0	1/0	1/0	1/0	1/0	1/0	1/0	1/0	1/0	1/0	1/0	1/0	1/0	1/0	1/0	1/0
NC_037338.1:90647362-90647630(+)	BosSINEL	50.85	49.15	537	519	16	505	7	8	1/0	1/0	1/0	1/0	1/0	1/0	1/1	1/0	1/0	1/0	1/0	1/0	1/0	1/0	1/0	1/0	1/0	1/0	1/0	1/0	1/0	1/0	1/0	1/0	1/0	1/0	1/0	1/0	1/0	1/0	1/0	1/0	1/0	1/0	1/0	1/0	1/0	1/0	1/0	1/0
NC_037338.1:91313825-91314085(+)	BosSINEL	49.81	50.19	529	533	2	525	4	5	1/0	1/0	1/0	1/0	1/0	1/0	1/0	1/0	1/0	1/0	1/0	1/0	1/0	1/0	1/0	1/0	1/0	1/0	1/0	1/0	1/0	1/0	1/0	1/0	1/0	1/0	1/0	1/0	1/0	1/0	1/0	1/0	1/0	1/0	1/0	1/0	1/0	1/0	1/0	1/0
NC_037338.1:91579481-91579542(+)	BosSINEL	49.62	50.38	528	536	4	520	8	4	1/0	1/0	1/0	1/0	1/0	1/0	1/0	1/0	1/0	1/0	1/0	1/0	1/0	1/0	1/0	1/0	1/0	1/0	1/0	1/0	1/0	1/0	1/0	1/0	1/0	1/0	1/0	1/0	1/0	1/0	1/0	1/0	1/0	1/0	1/0	1/0	1/0	1/0	1/0	1/0
NC_037338.1:92273944-92274218(+)	BosSINEL	67.11	32.89	706	346	181	344	1	10	1/0	1/0	1/0	1/0	1/1	1/1	1/0	1/1	1/1	1/0	1/1	1/1	1/1	1/0	1/0	1/1	1/1	1/0	1/0	1/0	1/1	1/1	1/0	1/0	1/0	1/0	1/1	1/1	1/0	1/1	1/0	1/0	1/1	1/0	1/1	1/0	1/0	1/0	1/0	1/1
NC_037338.1:93265789-93265923(-)	BosSINEL	85.23	14.77	883	153	369	145	4	18	1/0	1/1	1/0	1/0	1/0	1/1	1/0	1/1	1/0	1/0	1/0	1/1	1/0	1/1	1/1	1/1	1/1	1/1	1/1	1/1	1/1	1/1	1/1	1/0	1/1	1/1	1/0	1/1	1/1	1/1	1/1	1/1	1/1	1/0	1/0	1/0	1/1	1/0	1/1	1/0
NC_037338.1:93366631-93366907(-)	BosSINEL	52.19	47.81	547	501	30	487	7	12	1/0	1/0	1/0	1/0	1/1	1/0	1/0	1/0	1/0	1/0	1/0	1/0	1/0	1/0	1/0	1/0	1/0	1/0	1/0	1/0	1/0	1/0	1/0	1/0	1/0	1/0	1/0	1/0	1/0	1/0	1/0	1/0	1/0	1/0	1/0	1/0	1/0	1/0	1/0	1/0
NC_037338.1:93655793-93656066(+)	BosSINEL	53.01	46.99	564	500	40	484	8	4	1/0	1/0	1/0	1/0	1/0	1/0	1/0	1/0	1/0	1/0	1/1	1/0	1/1	1/0	1/0	1/0	1/0	1/1	1/0	1/0	1/0	1/0	1/0	1/0	1/0	1/0	1/0	1/0	1/0	1/0	1/0	1/0	1/0	1/0	1/0	1/0	1/0	1/0	1/0	1/0
NC_037338.1:93656499-93656682(+)	BosSINEL	78	22	819	231	294	231	0	11	1/1	1/1	1/0	1/0	1/1	1/0	1/1	1/1	1/1	1/0	1/0	1/1	1/0	1/0	1/0	1/1	1/0	1/1	1/1	1/1	1/1	1/1	1/1	1/1	1/0	1/1	1/1	1/0	1/1	1/1	1/1	1/0	1/0	1/1	1/1	1/1	1/0	1/0	1/1	1/0
NC_037338.1:95794088-95794336(+)	BosSINEL	65.25	34.75	689	367	162	365	1	8	1/0	1/1	1/1	1/1	1/1	1/0	1/0	1/0	1/0	1/0	1/0	1/0	1/0	1/0	1/0	1/1	1/0	1/0	1/0	1/0	1/0	1/0	1/0	1/0	1/0	1/0	1/0	1/0	1/0	1/0	1/0	1/0	1/0	1/0	1/0	1/1	1/0	1/0	1/0	1/0
NC_037338.1:95827001-95827272(-)	BosSINEL	60.42	39.58	638	418	113	412	3	8	1/1	1/0	1/0	1/0	1/0	1/0	1/0	1/0	1/0	1/0	1/0	1/0	1/0	1/0	1/0	1/0	1/0	1/0	1/0	1/0	1/0	1/0	1/0	1/0	1/0	1/1	1/1	1/0	1/0	1/1	1/0	1/0	1/0	1/0	1/0	1/0	1/0	1/0	1/1	1/0
NC_037338.1:96070297-96070572(+)	BosSINEL	49.72	50.28	528	534	5	518	8	5	1/0	1/0	1/0	1/0	1/0	1/0	1/0	1/0	1/0	1/0	1/0	1/0	1/0	1/0	1/0	1/0	1/0	1/0	1/0	1/0	1/0	1/0	1/0	1/0	1/0	1/0	1/0	1/0	1/0	1/0	1/0	1/0	1/0	1/0	1/0	1/0	1/0	1/0	1/0	1/0
NC_037338.1:96165673-96165802(+)	BosSINEL	48.2	51.8	510	548	4	502	23	7	1/0	1/0	1/0	1/0	1/0	1/0	0/0	1/0	1/0	1/0	1/0	1/0	1/0	1/0	1/0	1/0	1/0	1/0	1/0	1/0	1/0	1/0	1/0	1/0	0/0	1/0	1/0	1/0	1/0	1/0	1/0	1/0	1/0	1/0	1/0	1/0	1/0	1/0	1/0	1/0
NC_037338.1:97345181-97345455(-)	BosSINEL	54.15	45.85	574	486	50	474	6	6	1/0	1/0	1/0	1/0	1/0	1/0	1/0	1/0	1/0	1/0	1/0	1/0	1/0	1/0	1/0	1/0	1/0	1/0	1/0	1/0	1/0	1/0	1/0	1/0	1/0	1/0	1/0	1/0	1/0	1/0	1/0	1/0	1/0	1/0	1/0	1/0	1/0	1/0	1/0	1/0
NC_037338.1:101390925-101391057(-)	BosSINEL	57.12	42.88	602	452	81	440	6	9	1/0	1/0	1/0	1/0	1/1	1/0	1/0	1/0	1/0	1/0	1/0	1/0	1/0	1/0	1/0	1/1	1/1	1/0	1/1	1/0	1/0	1/0	1/0	1/0	1/0	1/0	1/1	1/0	1/0	1/0	1/0	1/0	1/0	1/0	1/0	1/0	1/1	1/0	1/1	1/0
NC_037338.1:103352566-103352841(-)	BosSINEL	49.25	50.75	522	538	0	522	8	6	1/0	1/0	1/0	1/0	1/0	1/0	1/0	1/0	1/0	1/0	1/0	1/0	1/0	1/0	1/0	1/0	1/0	1/0	1/0	1/0	1/0	1/0	1/0	1/0	1/0	1/0	1/0	1/0	1/0	1/0	1/0	1/0	1/0	1/0	1/0	1/0	1/0	1/0	1/0	1/0
NC_037338.1:103361650-103361923(-)	BosSINEL	81.46	18.54	857	195	333	191	2	10	1/0	1/0	1/0	1/0	1/1	1/1	1/1	1/1	1/1	1/1	1/1	1/0	1/1	1/1	1/1	1/1	1/1	1/1	1/1	1/1	1/1	1/1	1/1	1/0	1/1	1/1	1/0	1/1	1/1	1/1	1/1	1/1	1/1	1/1	1/1	1/1	1/1	1/1	1/1	1/1
NC_037338.1:103449751-103450024(-)	BosSINEL	49.16	50.84	525	543	3	519	12	2	1/0	1/0	1/0	1/0	1/0	1/0	1/0	1/0	1/0	1/0	1/0	1/0	1/0	1/0	1/0	1/0	1/0	1/0	1/0	1/0	1/0	1/0	1/0	1/0	1/0	1/0	1/0	1/0	1/0	1/0	1/0	1/0	1/0	1/0	1/0	1/0	1/0	1/0	1/0	1/0
NC_037338.1:104159566-104159842(+)	BosSINEL	33.43	66.57	353	703	1	351	176	8	1/0	1/0	1/0	1/0	0/0	1/0	0/0	0/0	0/0	1/0	0/0	1/0	1/0	0/0	0/0	0/0	1/0	1/0	0/0	1/0	1/0	1/0	0/0	0/0	1/0	0/0	1/0	1/0	0/0	1/0	1/0	1/0	1/0	1/0	0/0	1/0	1/0	0/0	1/0	1/0
NC_037338.1:104247666-104247943(-)	BosSINEL	73.72	26.28	777	277	255	267	5	9	1/1	1/0	1/1	1/0	1/1	1/1	1/1	1/1	1/1	1/1	1/1	1/1	1/1	1/0	1/0	1/1	1/1	1/1	1/0	1/1	1/1	1/1	1/0	1/0	1/0	1/0	1/0	1/0	1/1	1/1	1/0	1/1	1/1	1/0	1/0	1/0	1/0	1/1	1/1	1/1
NC_037338.1:106294389-106294654(-)	BosSINEL	47.76	52.24	511	559	0	511	24	1	1/0	1/0	1/0	1/0	1/0	1/0	1/0	1/0	1/0	1/0	1/0	1/0	1/0	1/0	1/0	1/0	1/0	1/0	1/0	1/0	1/0	1/0	1/0	1/0	1/0	1/0	1/0	1/0	1/0	1/0	1/0	1/0	1/0	1/0	1/0	1/0	1/0	1/0	1/0	1/0
NC_037338.1:106861568-106861842(+)	BosSINEL	74.05	25.95	779	273	258	263	5	10	1/1	1/1	1/1	1/1	1/0	1/0	1/0	1/0	1/0	1/0	1/0	1/0	1/0	1/0	1/0	1/0	1/0	1/0	1/0	1/0	1/0	1/0	1/0	1/0	1/0	1/0	1/1	1/0	1/1	1/0	1/0	1/0	1/0	1/0	1/1	1/0	1/0	1/1	1/0	1/0
NC_037338.1:106910898-106910944(-)	BosSINEL	69.8	30.2	705	305	203	299	3	31	1/0	1/1	1/0	1/1	1/0	1/1	1/1	1/0	1/1	1/1	1/0	1/1	1/1	1/1	1/1	1/1	1/0	1/0	1/1	1/1	1/0	1/1	1/1	1/0	1/1	1/0	1/0	1/0	1/1	1/1	1/1	1/1	1/1	1/0	1/0	1/0	1/1	1/1	1/0	1/0
NC_037338.1:106911000-106911046(-)	BosSINEL	74.35	25.65	739	255	245	249	3	39	1/0	1/0	1/0	1/0	1/1	1/1	1/1	1/0	1/1	1/1	1/1	1/0	1/1	1/1	1/0	1/1	1/1	1/0	1/1	1/1	1/1	1/1	1/0	1/1	1/1	1/0	1/1	1/1	1/1	1/0	1/1	1/1	1/1	1/1	1/1	1/0	1/1	1/1	1/0	1/1
NC_037338.1:106957514-106957786(+)	BosSINEL	81.92	18.08	852	188	335	182	3	16	1/1	1/0	1/0	1/1	1/1	1/1	1/0	1/0	1/0	1/1	1/1	1/1	1/1	1/1	1/1	1/0	1/1	1/1	1/1	1/1	1/1	1/1	1/1	1/1	1/0	1/1	1/1	1/0	1/1	1/0	1/1	1/0	1/1	1/1	1/1	1/1	1/1	1/1	1/1	1/1
NC_037338.1:106958026-106958301(-)	BosSINEL	67.68	32.32	712	340	187	338	1	10	1/0	1/1	1/0	1/0	1/1	1/0	1/1	1/0	1/0	1/0	1/0	1/0	1/0	1/0	1/0	1/1	1/0	1/1	1/0	1/0	1/1	1/0	1/0	1/0	1/1	1/0	1/1	1/0	1/0	1/0	1/1	1/0	1/1	1/0	1/0	1/0	1/0	1/0	1/1	1/1
NC_037338.1:106959081-106959337(+)	BosSINEL	57.6	42.4	606	446	82	442	2	10	1/0	1/0	1/0	1/0	1/0	1/0	1/0	1/1	1/0	1/0	1/0	1/0	1/1	1/0	1/0	1/0	1/0	1/0	1/0	1/0	1/0	1/0	1/0	1/0	1/0	1/0	1/1	1/0	1/0	1/0	1/0	1/0	1/0	1/1	1/0	1/0	1/0	1/0	1/0	1/0
NW_020191325.1:79858-80134(+)	BosSINEL	89.36	10.64	899	107	402	95	6	33	1/1	1/1	1/1	1/1	1/1	1/1	1/0	1/1	1/1	1/1	1/0	0/0	1/1	1/1	1/1	1/0	1/1	1/0	1/0	1/1	1/1	1/0	1/0	1/1	1/1	1/0	1/1	1/1	1/0	1/0	1/0	1/1	1/1	1/1	1/1	1/0	1/1	1/1	1/0	1/0
NW_020191356.1:31618-31752(+)	BosSINEL	60.13	39.87	635	421	107	421	0	8	1/0	1/0	1/0	1/0	1/0	1/0	1/1	1/1	1/1	1/0	1/1	1/1	1/1	1/0	1/0	1/1	1/0	1/0	1/1	1/0	1/0	1/0	1/1	1/1	1/1	1/0	1/0	1/0	1/1	1/0	1/0	1/1	1/0	1/0	1/1	1/1	1/0	1/0	1/0	1/0
NW_020191356.1:64298-64574(-)	BosSINEL	52.27	47.73	552	504	41	470	17	8	1/0	1/0	1/0	1/0	1/0	1/0	1/0	1/0	1/0	1/0	1/0	1/0	1/0	1/0	1/0	1/0	1/0	1/0	1/0	1/0	1/0	1/0	1/0	1/0	1/0	1/0	1/0	1/0	1/0	1/0	1/0	1/0	1/0	1/0	1/0	1/0	1/0	1/0	1/0	1/0
NW_020191370.1:13596-13864(-)	BosSINEL	74.11	25.89	747	261	262	223	19	32	1/1	1/1	1/1	1/1	1/1	1/1	1/1	1/1	1/1	1/1	1/0	1/0	1/0	1/0	0/0	1/0	1/0	1/0	1/1	NA	1/1	1/1	1/1	1/1	1/0	1/0	1/0	1/0	1/0	1/1	1/0	1/0	1/0	1/1	1/0	1/1	1/0	1/1	1/0	1/1
NW_020191373.1:17723-18021(-)	BosSINEL	45.94	54.06	487	573	0	487	43	6	1/0	1/0	1/0	1/0	1/0	1/0	1/0	1/0	1/0	1/0	1/0	1/0	1/0	1/0	1/0	1/0	1/0	1/0	1/0	1/0	1/0	1/0	1/0	1/0	0/0	1/0	1/0	1/0	1/0	1/0	1/0	1/0	1/0	1/0	1/0	1/0	1/0	1/0	1/0	1/0
NW_020190209.1:93774-94042(+)	BosSINEL	53.3	46.7	565	495	37	491	2	6	1/0	1/0	1/0	1/0	1/1	1/0	1/0	1/0	1/0	1/0	1/0	1/0	1/0	1/0	1/0	1/0	1/0	1/0	1/0	1/0	1/0	1/0	1/0	1/0	1/0	1/0	1/0	1/0	1/0	1/0	1/0	1/0	1/0	1/0	1/0	1/0	1/0	1/0	1/0	1/0
NW_020190209.1:219358-219626(+)	BosSINEL	81.1	18.9	858	200	329	200	0	7	1/1	1/0	1/0	1/1	1/1	1/0	1/1	1/0	1/0	1/0	1/0	1/1	1/1	1/1	1/1	1/1	1/0	1/0	1/1	1/0	1/0	1/0	1/0	1/1	1/1	1/0	1/1	1/1	1/1	1/0	1/0	1/0	1/0	1/1	1/1	1/0	1/0	1/0	1/0	1/0
NW_020191430.1:9838-10107(+)	BosSINEL	52.74	47.26	559	501	42	475	13	6	1/0	1/0	1/0	1/0	1/0	1/0	1/0	1/1	1/0	1/0	1/0	1/0	1/0	1/0	1/0	1/0	1/0	1/0	1/0	1/0	1/0	1/0	1/0	1/0	1/0	1/0	1/0	1/0	1/0	1/0	1/0	1/0	1/0	1/0	1/0	1/0	1/0	1/1	1/1	1/0
NC_037339.1:140186-140431(-)	BosSINEL	48.31	51.69	516	552	0	516	18	2	1/0	1/0	1/0	1/0	1/0	1/0	1/0	1/0	1/0	1/0	1/0	1/0	1/0	1/0	1/0	1/0	1/0	1/0	1/0	1/0	1/0	1/0	1/0	1/0	1/0	1/0	1/0	1/0	1/0	1/0	1/0	1/0	1/0	1/0	1/0	1/0	1/0	1/0	1/0	1/0
NC_037339.1:302114-302382(+)	BosSINEL	51.5	48.5	548	516	21	506	5	4	1/0	1/0	1/0	1/0	1/0	1/0	1/0	1/0	1/0	1/0	1/0	1/0	1/0	1/0	1/0	1/0	1/0	1/0	1/0	1/0	1/0	1/0	1/0	1/0	1/0	1/0	1/0	1/0	1/0	1/0	1/0	1/0	1/0	1/0	1/0	1/0	1/0	1/0	1/0	1/0
NC_037339.1:416278-416543(-)	BosSINEL	49.72	50.28	527	533	4	519	7	6	1/0	1/0	1/0	1/0	1/0	1/0	1/0	1/0	1/0	1/0	1/0	1/0	1/0	1/0	1/0	1/0	1/0	1/0	1/0	1/0	1/0	1/0	1/0	1/0	1/0	1/0	1/0	1/0	1/0	1/0	1/0	1/0	1/0	1/0	1/0	1/0	1/0	1/0	1/0	1/0
NC_037339.1:1037094-1037364(+)	BosSINEL	86.44	13.56	899	141	379	141	0	16	1/1	1/1	1/0	1/1	1/0	1/0	1/1	1/1	1/0	1/0	1/1	1/0	1/0	1/0	1/1	1/0	1/1	1/1	1/1	1/1	1/1	1/0	1/1	1/1	1/0	1/1	1/0	1/1	1/1	1/0	1/1	1/0	1/1	1/1	1/0	1/1	1/0	1/1	1/1	1/1
NC_037339.1:1152267-1152536(+)	BosSINEL	76.76	23.24	806	244	281	244	0	11	1/0	1/0	1/1	1/0	1/0	1/1	1/1	1/1	1/1	1/1	1/1	1/1	1/1	1/1	1/1	1/1	1/1	1/1	1/1	1/0	1/0	1/1	1/0	1/1	1/1	1/1	1/1	1/1	1/1	1/1	1/1	1/1	1/1	1/1	1/0	1/0	1/1	1/1	1/1	1/1
NC_037339.1:1476247-1476388(-)	BosSINEL	49.16	50.84	524	542	0	524	9	3	1/0	1/0	1/0	1/0	1/0	1/0	1/0	1/0	1/0	1/0	1/0	1/0	1/0	1/0	1/0	1/0	1/0	1/0	1/0	1/0	1/0	1/0	1/0	1/0	1/0	1/0	1/0	1/0	1/0	1/0	1/0	1/0	1/0	1/0	1/0	1/0	1/0	1/0	1/0	1/0
NC_037339.1:1486143-1486276(-)	BosSINEL	48.31	51.69	516	552	0	516	18	2	1/0	1/0	1/0	1/0	1/0	1/0	1/0	1/0	1/0	1/0	1/0	1/0	1/0	1/0	1/0	1/0	1/0	1/0	1/0	1/0	1/0	1/0	1/0	1/0	1/0	1/0	1/0	1/0	1/0	1/0	1/0	1/0	1/0	1/0	1/0	1/0	1/0	1/0	1/0	1/0
NC_037339.1:1969895-1970169(-)	BosSINEL	74.52	25.48	784	268	259	266	1	10	1/1	1/1	1/1	1/1	1/0	1/0	1/0	1/1	1/0	1/0	1/1	1/0	1/1	1/0	1/1	1/0	1/0	1/0	1/0	1/0	1/0	1/0	1/1	1/1	1/0	1/0	1/0	1/0	1/0	1/0	1/0	1/0	1/0	1/0	1/0	1/0	1/0	1/0	1/0	1/0
NC_037339.1:2749012-2749286(+)	BosSINEL	60.4	39.6	639	419	112	415	2	7	1/0	1/1	1/0	1/0	1/0	1/0	1/0	1/1	1/0	1/0	1/0	1/0	1/0	1/0	1/0	1/0	1/0	1/1	1/0	1/0	1/0	1/0	1/0	1/0	1/1	1/0	1/1	1/1	1/0	1/0	1/0	1/0	1/0	1/0	1/0	1/0	1/0	1/0	1/0	1/0
NC_037339.1:2942062-2942334(-)	BosSINEL	64.62	35.38	672	368	155	362	3	16	1/0	1/0	1/0	1/0	1/1	1/1	1/1	1/0	1/0	1/0	1/1	1/0	1/0	1/0	1/0	1/1	1/1	1/0	1/1	1/0	1/0	1/0	1/0	1/1	1/0	1/0	1/0	1/1	1/0	1/1	1/0	1/0	1/0	1/1	1/0	1/1	1/1	1/1	1/0	1/0
NC_037339.1:2999523-2999730(-)	BosSINEL	55.97	44.03	591	465	68	455	5	8	1/0	1/0	1/1	1/0	1/0	1/0	1/0	1/0	1/0	1/0	1/0	1/0	1/0	1/0	1/0	1/0	1/0	1/0	1/0	1/0	1/0	1/0	1/0	1/0	1/0	1/0	1/0	1/0	1/0	1/0	1/0	1/0	1/0	1/0	1/0	1/0	1/0	1/0	1/0	1/0
NC_037339.1:3303286-3303562(+)	BosSINEL	49.15	50.85	521	539	0	521	9	6	1/0	1/0	1/0	1/0	1/0	1/0	1/0	1/0	1/0	1/0	1/0	1/0	1/0	1/0	1/0	1/0	1/0	1/0	1/0	1/0	1/0	1/0	1/0	1/0	1/0	1/0	1/0	1/0	1/0	1/0	1/0	1/0	1/0	1/0	1/0	1/0	1/0	1/0	1/0	1/0
NC_037339.1:5050283-5050388(+)	BosSINEL	49.72	50.28	527	533	2	523	5	6	1/0	1/0	1/0	1/0	1/0	1/0	0/0	1/0	1/0	1/0	1/0	1/0	1/0	1/0	1/0	1/0	1/0	1/0	1/0	1/0	1/0	1/0	1/0	1/0	1/0	1/0	1/0	1/0	1/0	1/0	1/0	1/0	1/0	1/0	1/0	1/0	1/0	1/0	1/0	1/0
NC_037339.1:5332786-5332974(-)	BosSINEL	62.83	37.17	661	391	139	383	4	10	1/0	1/0	1/0	1/0	1/0	1/1	1/1	1/0	1/0	1/0	1/0	1/0	1/0	1/1	1/1	1/1	1/0	1/0	1/0	1/0	1/1	1/0	1/0	1/0	1/0	1/1	1/0	1/0	1/0	1/0	1/1	1/0	1/0	1/0	1/1	1/0	1/0	1/0	1/1	1/0
NC_037339.1:5548556-5548826(-)	BosSINEL	49.81	50.19	525	529	5	515	7	9	1/0	1/0	1/0	1/0	1/0	1/0	1/0	1/0	1/0	1/0	1/0	1/0	1/0	1/0	1/0	1/0	1/0	1/0	1/0	1/0	1/0	1/0	1/0	1/0	1/0	1/0	1/0	1/0	1/0	1/0	1/0	1/0	1/0	1/0	1/0	1/0	1/0	1/0	1/0	1/0
NC_037339.1:6015878-6016017(-)	BosSINEL	59.6	40.4	633	429	104	425	2	5	1/0	1/0	1/0	1/0	1/0	1/0	1/0	1/0	1/1	1/0	1/1	1/0	1/0	1/0	1/0	1/0	1/0	1/0	1/1	1/1	1/0	1/0	1/0	1/1	1/1	1/0	1/0	1/0	1/1	1/0	1/1	1/0	1/0	1/1	1/0	1/0	1/0	1/0	1/1	1/0
NC_037339.1:6231995-6232271(-)	BosSINEL	49.34	50.66	523	537	0	523	7	6	1/0	1/0	1/0	1/0	1/0	1/0	1/0	1/0	1/0	1/0	1/0	1/0	1/0	1/0	1/0	1/0	1/0	1/0	1/0	1/0	1/0	1/0	1/0	1/0	1/0	1/0	1/0	1/0	1/0	1/0	1/0	1/0	1/0	1/0	1/0	1/0	1/0	1/0	1/0	1/0
NC_037339.1:6443026-6443294(+)	BosSINEL	49.34	50.66	523	537	7	509	14	6	1/0	1/0	1/0	1/0	1/0	1/0	1/0	1/0	1/0	1/0	1/0	1/0	1/0	1/0	1/0	1/0	1/0	1/0	1/0	1/0	1/0	1/0	1/0	1/0	1/0	1/0	1/0	1/0	1/0	1/0	1/0	1/0	1/0	1/0	1/0	1/0	1/0	1/0	1/0	1/0
NC_037339.1:7794845-7795126(+)	BosSINEL	66.6	33.4	706	354	177	352	1	6	1/1	1/0	1/0	1/0	1/0	1/0	1/0	1/1	1/1	1/1	1/1	1/0	1/1	1/0	1/0	1/0	1/1	1/0	1/1	1/0	1/0	1/0	1/1	1/0	1/1	1/1	1/1	1/0	1/0	1/0	1/0	1/0	1/0	1/0	1/0	1/0	1/1	1/1	1/0	1/1
NC_037339.1:8417413-8417684(-)	BosSINEL	49.72	50.28	529	535	1	527	4	4	1/0	1/0	1/0	1/0	1/0	1/0	1/0	1/0	1/0	1/0	1/0	1/0	1/0	1/0	1/0	1/0	1/0	1/0	1/0	1/0	1/0	1/0	1/0	1/0	1/0	1/0	1/0	1/0	1/0	1/0	1/0	1/0	1/0	1/0	1/0	1/0	1/0	1/0	1/0	1/0
NC_037339.1:8531800-8532075(+)	BosSINEL	76.19	23.81	803	251	280	243	4	9	1/1	1/1	1/1	1/0	1/0	1/0	1/0	1/1	1/0	1/0	1/0	1/0	1/0	1/1	1/1	1/1	1/0	1/0	1/0	1/0	1/1	1/0	1/0	1/0	1/0	1/1	1/0	1/0	1/0	1/0	1/1	1/1	1/0	1/0	1/0	1/0	1/0	1/0	1/1	1/0
NC_037339.1:8657264-8657533(+)	BosSINEL	46.9	53.1	500	566	0	500	33	3	1/0	1/0	1/0	1/0	1/0	1/0	1/0	1/0	1/0	1/0	1/0	1/0	1/0	1/0	1/0	0/0	0/0	1/0	1/0	1/0	1/0	1/0	1/0	1/0	0/0	0/0	1/0	1/0	1/0	1/0	1/0	1/0	1/0	1/0	1/0	1/0	1/0	1/0	1/0	1/0
NC_037339.1:10689758-10690035(+)	BosSINEL	85.67	14.33	891	149	372	147	1	16	1/1	1/1	1/1	1/0	1/1	1/0	1/1	1/1	1/0	1/1	1/1	1/1	1/1	1/1	1/0	1/0	1/1	1/1	1/1	1/0	1/1	1/0	1/0	1/0	1/0	1/0	1/0	1/1	1/0	1/0	1/1	1/1	1/1	1/0	1/1	1/1	1/1	1/1	1/0	1/1
NC_037339.1:10943373-10943589(+)	BosSINEL	69.81	30.19	733	317	211	311	3	11	1/1	1/1	1/1	1/0	1/1	1/0	1/1	1/0	1/0	1/0	1/0	1/0	1/1	1/1	1/0	1/0	1/0	1/1	1/0	1/0	1/0	1/1	1/0	1/0	1/0	1/0	1/0	1/0	1/0	1/0	1/0	1/0	1/0	1/0	1/0	1/0	1/0	1/0	1/1	1/0
NC_037339.1:12772437-12772712(+)	BosSINEL	25.29	74.71	263	777	50	163	307	16	1/0	1/0	0/0	1/0	1/1	0/0	1/0	1/0	0/0	1/1	0/0	0/0	1/0	0/0	0/0	0/0	1/0	1/0	1/1	0/0	1/0	0/0	1/1	0/0	0/0	0/0	1/0	0/0	0/0	0/0	0/0	0/0	1/1	0/0	1/0	0/0	1/1	0/0	0/0	0/0
NC_037339.1:12850407-12850546(-)	BosSINEL	82.43	17.57	854	182	338	178	2	18	1/0	1/0	1/0	1/1	1/1	1/1	1/0	1/1	1/0	1/1	1/0	1/0	1/0	1/0	1/0	NA	1/1	1/0	1/0	1/0	1/0	1/0	1/0	1/0	1/0	1/0	1/1	1/0	1/1	1/0	1/0	1/0	1/0	1/0	1/0	1/1	1/0	1/1	1/0	1/0
NC_037339.1:14285125-14285379(+)	BosSINEL	80.59	19.41	851	205	323	205	0	8	1/0	1/1	1/1	1/0	1/1	1/1	1/1	1/0	1/0	1/1	1/1	1/0	1/1	1/0	1/1	1/0	1/0	1/0	1/1	1/0	1/1	1/1	1/0	1/1	1/1	1/1	1/0	1/0	1/0	1/0	1/1	1/1	1/1	1/0	1/0	1/1	1/0	1/0	1/0	1/1
NC_037339.1:15674886-15675162(-)	BosSINEL	88.76	11.24	932	118	407	118	0	11	1/1	1/1	1/1	1/1	1/1	1/1	1/1	1/1	1/1	1/1	1/1	1/1	1/1	1/1	1/1	1/1	1/1	1/1	1/1	1/1	1/0	1/1	1/1	1/1	1/0	1/1	1/1	1/0	1/1	1/0	1/1	1/0	1/1	1/1	1/1	1/1	1/1	1/1	1/1	1/1
NC_037339.1:15750039-15750307(-)	BosSINEL	87.62	12.38	920	130	397	126	2	11	1/1	1/1	1/0	1/1	1/1	1/1	1/1	1/1	1/1	1/1	1/1	1/0	1/1	1/1	1/0	1/1	1/1	1/0	1/0	1/1	1/0	1/1	1/1	1/0	1/1	1/0	1/1	1/0	1/1	1/1	1/1	1/1	1/0	1/1	1/1	1/1	1/1	1/0	1/1	1/1
NC_037339.1:17152142-17152417(+)	BosSINEL	50	50	527	527	6	515	6	9	1/0	1/0	1/0	1/0	1/0	1/0	1/0	1/0	1/0	1/0	1/0	1/0	1/0	1/0	1/0	0/0	1/0	1/0	1/0	1/0	1/0	1/0	1/0	1/0	1/0	1/0	1/0	1/0	1/0	1/0	1/0	1/0	1/0	1/0	1/0	1/0	1/0	1/0	1/0	1/0
NC_037339.1:17162076-17162279(+)	BosSINEL	77.09	22.91	811	241	285	241	0	10	1/0	1/0	1/0	1/0	1/1	1/1	1/1	1/1	1/1	1/1	1/1	1/1	1/0	1/1	1/1	1/1	1/0	1/0	1/0	1/1	1/1	1/1	1/0	1/1	1/1	1/1	1/0	1/1	1/1	1/1	1/1	1/1	1/0	1/1	1/1	1/1	1/1	1/0	1/1	1/1
NC_037339.1:17595108-17595382(+)	BosSINEL	49.91	50.09	529	531	5	519	6	6	1/0	1/0	1/0	1/0	1/0	1/0	1/0	1/0	1/0	1/0	1/0	1/0	1/0	1/0	1/0	1/0	1/0	1/0	1/0	1/0	1/0	1/0	1/0	1/0	1/0	1/0	1/0	1/0	1/0	1/0	1/0	1/0	1/0	1/0	1/0	1/0	1/0	1/0	1/0	1/0
NC_037339.1:18076869-18077155(+)	BosSINEL	89.85	10.15	947	107	421	105	1	9	1/1	1/0	1/0	1/0	1/1	1/1	1/1	1/1	1/1	1/1	1/1	1/1	1/1	1/1	1/1	1/1	1/1	1/1	1/1	1/1	1/1	1/1	1/1	1/1	1/1	1/1	1/1	1/1	1/1	1/1	1/1	1/1	1/1	1/1	1/1	1/1	1/1	1/1	1/1	1/1
NC_037339.1:18709236-18709511(-)	BosSINEL	75.66	24.34	802	258	275	252	3	6	1/1	1/0	1/1	1/0	1/1	1/1	1/1	1/0	1/0	1/1	1/0	1/1	1/0	1/0	1/1	1/1	1/0	1/0	1/1	1/1	1/1	1/0	1/0	1/0	1/0	1/1	1/1	1/1	1/1	1/0	1/0	1/1	1/0	1/0	1/0	1/0	1/0	1/0	1/1	1/0
NC_037339.1:23001561-23001836(+)	BosSINEL	48.97	51.03	525	547	0	525	11	0	1/0	1/0	1/0	1/0	1/0	1/0	1/0	1/0	1/0	1/0	1/0	1/0	1/0	1/0	1/0	1/0	1/0	1/0	1/0	1/0	1/0	1/0	1/0	1/0	1/0	1/0	1/0	1/0	1/0	1/0	1/0	1/0	1/0	1/0	1/0	1/0	1/0	1/0	1/0	1/0
NC_037339.1:23961292-23961557(+)	BosSINEL	48.78	51.22	521	547	0	521	13	2	1/0	1/0	1/0	1/0	1/0	1/0	1/0	1/0	1/0	1/0	1/0	1/0	1/0	1/0	1/0	1/0	1/0	1/0	1/0	1/0	1/0	1/0	1/0	1/0	1/0	1/0	1/0	1/0	1/0	1/0	1/0	1/0	1/0	1/0	1/0	1/0	1/0	1/0	1/0	1/0
NC_037339.1:24097491-24097764(+)	BosSINEL	49.81	50.19	530	534	2	526	4	4	1/0	1/0	1/0	1/0	1/0	1/0	1/0	1/0	1/0	1/0	1/0	1/0	1/0	1/0	1/0	1/0	1/0	1/0	1/0	1/0	1/0	1/0	1/0	1/0	1/0	1/0	1/0	1/0	1/0	1/0	1/0	1/0	1/0	1/0	1/0	1/0	1/0	1/0	1/0	1/0
NC_037339.1:26078075-26078349(+)	BosSINEL	71.97	28.03	760	296	232	296	0	8	1/0	1/0	1/1	1/0	1/1	1/0	1/1	1/0	1/1	1/0	1/0	1/1	1/0	1/0	1/1	1/1	1/0	1/0	1/1	1/0	1/1	1/1	1/1	1/1	1/0	1/1	1/1	1/0	1/0	1/0	1/1	1/0	1/1	1/1	1/0	1/0	1/1	1/0	1/0	1/0
NC_037339.1:26605859-26606129(-)	BosSINEL	50.28	49.72	531	525	6	519	3	8	1/0	1/0	1/0	1/0	1/0	1/0	1/0	1/0	1/0	1/0	1/0	1/0	1/0	1/0	1/0	1/0	1/0	1/0	1/0	1/0	1/0	1/0	1/0	1/0	1/0	1/0	1/0	1/0	1/0	1/0	1/0	1/0	1/0	1/0	1/0	1/0	1/0	1/0	1/0	1/0
NC_037339.1:27416198-27416463(-)	BosSINEL	48.69	51.31	522	550	0	522	14	0	1/0	1/0	1/0	1/0	1/0	1/0	1/0	1/0	1/0	1/0	1/0	1/0	1/0	1/0	1/0	1/0	1/0	1/0	1/0	1/0	1/0	1/0	1/0	1/0	1/0	1/0	1/0	1/0	1/0	1/0	1/0	1/0	1/0	1/0	1/0	1/0	1/0	1/0	1/0	1/0
NC_037339.1:27487834-27488108(+)	BosSINEL	58.14	41.86	614	442	95	424	9	8	1/0	1/0	1/0	1/0	1/0	1/1	1/0	1/0	1/0	1/0	1/0	1/0	1/0	1/0	1/0	1/0	1/0	1/0	1/0	1/0	1/0	1/0	1/0	1/0	1/0	1/0	1/0	1/0	1/0	1/0	1/0	1/0	1/0	1/0	1/0	1/0	1/1	1/0	1/0	1/0
NC_037339.1:28170081-28170215(-)	BosSINEL	68.8	31.2	721	327	203	315	6	12	1/0	1/0	1/1	1/1	1/0	1/1	1/0	1/0	1/0	1/0	1/0	1/1	1/0	1/0	1/1	1/1	1/1	1/0	1/1	1/0	1/1	1/1	1/0	1/0	1/0	1/0	1/0	1/1	1/0	1/1	1/1	1/0	1/0	1/0	1/1	1/1	1/0	1/0	1/0	1/1
NC_037339.1:28267924-28268189(-)	BosSINEL	48.97	51.03	525	547	0	525	11	0	1/0	1/0	1/0	1/0	1/0	1/0	1/0	1/0	1/0	1/0	1/0	1/0	1/0	1/0	1/0	1/0	1/0	1/0	1/0	1/0	1/0	1/0	1/0	1/0	1/0	1/0	1/0	1/0	1/0	1/0	1/0	1/0	1/0	1/0	1/0	1/0	1/0	1/0	1/0	1/0
NC_037339.1:28690704-28690833(-)	BosSINEL	52.53	47.47	561	507	36	489	9	2	1/0	1/0	1/0	1/0	1/0	1/0	1/0	1/0	1/0	1/0	1/0	1/0	1/0	1/0	1/0	1/0	1/0	1/0	1/0	1/0	1/0	1/0	1/0	1/0	1/0	1/0	1/0	1/0	1/0	1/0	1/0	1/0	1/0	1/0	1/1	1/0	1/0	1/0	1/0	1/0
NC_037339.1:28993010-28993280(-)	BosSINEL	69.01	30.99	726	326	203	320	3	10	1/1	1/0	1/0	1/0	1/0	1/1	1/1	1/1	1/0	1/0	1/0	1/1	1/1	1/0	1/1	1/0	1/0	1/1	1/1	1/0	1/1	1/1	1/1	1/1	1/0	1/1	1/0	1/0	1/0	1/1	1/0	1/0	1/1	1/0	1/1	1/0	1/0	1/0	1/0	1/1
NC_037339.1:29359740-29360008(+)	BosSINEL	87.29	12.71	920	134	394	132	1	9	1/1	1/1	1/1	1/1	1/0	1/1	1/0	1/0	1/1	1/1	1/1	1/1	1/1	1/1	1/1	1/0	1/0	1/1	1/0	1/1	1/1	1/1	1/0	1/1	1/1	1/1	1/0	1/1	1/0	1/0	1/1	1/1	1/1	1/0	1/1	1/0	1/0	1/0	1/0	1/0
NC_037339.1:33249515-33249632(-)	BosSINEL	55.32	44.68	582	470	57	468	1	10	1/0	1/0	1/0	1/0	1/0	1/0	1/0	1/0	1/0	1/0	1/0	1/0	1/0	1/1	1/0	1/0	1/0	1/0	1/0	1/0	1/0	1/0	1/0	1/0	1/0	1/0	1/0	1/0	1/0	1/0	1/0	1/0	1/0	1/0	1/0	1/0	1/0	1/0	1/0	1/0
NC_037339.1:34481540-34481812(+)	BosSINEL	46.08	53.92	494	578	0	494	42	0	1/0	1/0	1/0	1/0	1/0	1/0	0/0	1/0	1/0	1/0	1/0	1/0	1/0	1/0	1/0	1/0	1/0	1/0	1/0	1/0	1/0	1/0	1/0	1/0	1/0	1/0	0/0	1/0	1/0	1/0	1/0	1/0	1/0	1/0	1/0	1/0	1/0	1/0	1/0	1/0
NC_037339.1:34630885-34631161(-)	BosSINEL	58.25	41.75	614	440	92	430	5	9	1/0	1/0	1/0	1/0	1/0	1/0	1/0	1/0	1/1	1/0	1/0	1/0	1/0	1/0	1/1	1/0	1/0	1/0	1/1	1/1	1/0	1/0	1/0	1/0	1/0	1/1	1/0	1/1	1/0	1/0	1/0	1/0	1/0	1/0	0/0	1/1	1/1	1/0	1/1	1/0
NC_037339.1:35923254-35923386(+)	BosSINEL	85.77	14.23	904	150	377	150	0	9	1/1	1/1	1/1	1/1	1/0	1/1	1/1	1/1	1/0	1/0	1/1	1/1	1/1	1/1	1/0	1/1	1/1	1/1	1/1	1/0	1/1	1/0	1/0	1/1	1/0	1/0	1/1	1/1	1/0	1/1	1/1	1/0	1/1	1/1	1/1	1/0	1/0	1/0	1/1	1/1
NC_037339.1:36096462-36096723(-)	BosSINEL	48.88	51.12	524	548	0	524	12	0	1/0	1/0	1/0	1/0	1/0	1/0	1/0	1/0	1/0	1/0	1/0	1/0	1/0	1/0	1/0	1/0	1/0	1/0	1/0	1/0	1/0	1/0	1/0	1/0	1/0	1/0	1/0	1/0	1/0	1/0	1/0	1/0	1/0	1/0	1/0	1/0	1/0	1/0	1/0	1/0
NC_037339.1:36807163-36807438(-)	BosSINEL	50.57	49.43	536	524	15	506	9	6	1/0	1/0	1/0	1/0	1/0	1/0	1/0	1/0	1/0	1/0	1/0	1/0	1/0	1/0	1/0	1/0	1/0	1/0	1/0	1/0	1/0	1/0	1/0	1/0	1/0	1/0	1/0	1/0	1/0	1/0	1/0	1/0	1/0	1/0	1/0	1/0	1/0	1/0	1/0	1/0
NC_037339.1:37259955-37260229(+)	BosSINEL	49.25	50.75	527	543	0	527	8	1	1/0	1/0	1/0	1/0	1/0	1/0	1/0	1/0	1/0	1/0	1/0	1/0	1/0	1/0	1/0	1/0	1/0	1/0	1/0	1/0	1/0	1/0	1/0	1/0	1/0	1/0	1/0	1/0	1/0	1/0	1/0	1/0	1/0	1/0	1/0	1/0	1/0	1/0	1/0	1/0
NC_037339.1:38076572-38076835(+)	BosSINEL	54.64	45.36	577	479	53	471	4	8	1/0	1/0	1/0	1/0	1/0	1/1	1/0	1/0	1/0	1/0	1/0	1/0	1/0	1/0	1/0	1/0	1/0	1/0	1/0	1/0	1/0	1/0	1/0	1/0	1/0	1/0	1/0	1/0	1/0	1/1	1/0	1/0	1/1	1/0	1/0	1/0	1/0	1/0	1/0	1/0
NC_037339.1:38559207-38559325(+)	BosSINEL	49.43	50.57	524	536	0	524	6	6	1/0	1/0	1/0	1/0	1/0	1/0	1/0	1/0	1/0	1/0	1/0	1/0	1/0	1/0	1/0	1/0	1/0	1/0	1/0	1/0	1/0	1/0	1/0	1/0	1/0	1/0	1/0	1/0	1/0	1/0	1/0	1/0	1/0	1/0	1/0	1/0	1/0	1/0	1/0	1/0
NC_037339.1:40432900-40433033(+)	BosSINEL	67.78	32.22	713	339	194	325	7	10	1/0	1/0	1/1	1/1	1/1	1/0	1/0	1/0	1/0	1/0	1/0	1/0	1/0	1/1	1/0	1/1	1/0	1/0	1/0	1/0	1/0	1/0	1/1	1/0	1/0	1/0	1/0	1/0	1/0	1/0	1/0	1/0	1/0	1/0	1/0	1/0	1/0	1/0	1/0	1/0
NC_037339.1:40911477-40911747(-)	BosSINEL	85.32	14.68	889	153	369	151	1	15	1/0	1/0	1/1	1/1	1/0	1/0	1/0	1/1	1/0	1/0	1/1	1/1	1/1	1/1	1/1	1/1	1/1	1/1	1/0	1/0	1/0	1/1	1/1	1/1	1/1	1/0	1/0	1/0	1/0	1/0	1/0	1/0	1/0	1/1	1/0	1/0	1/0	1/0	1/0	1/1
NC_037339.1:41093282-41093486(-)	BosSINEL	46.9	53.1	500	566	0	500	33	3	1/0	1/0	1/0	1/0	1/0	1/0	1/0	1/0	1/0	1/0	1/0	1/0	1/0	1/0	1/0	1/0	1/0	1/0	1/0	1/0	1/0	1/0	1/0	1/0	1/0	1/0	1/0	1/0	1/0	1/0	1/0	1/0	0/0	0/0	1/0	1/0	1/0	1/0	1/0	1/0
NC_037339.1:41316000-41316267(-)	BosSINEL	71.76	28.24	752	296	231	290	3	12	1/1	1/0	1/0	1/0	1/0	1/0	1/0	1/1	1/1	1/0	1/0	1/1	1/1	1/1	1/0	1/0	1/1	1/0	1/1	1/1	1/0	1/1	1/0	1/0	1/0	1/0	1/1	1/0	1/1	1/1	1/1	1/0	1/0	1/0	1/1	1/1	1/0	1/1	1/1	1/0
NC_037339.1:42080676-42080791(+)	BosSINEL	48.41	51.59	519	553	0	519	17	0	1/0	1/0	1/0	1/0	1/0	1/0	1/0	1/0	1/0	1/0	1/0	1/0	1/0	1/0	1/0	1/0	1/0	1/0	1/0	1/0	1/0	1/0	1/0	1/0	1/0	1/0	1/0	1/0	1/0	1/0	1/0	1/0	1/0	1/0	1/0	1/0	1/0	1/0	1/0	1/0
NC_037339.1:42082813-42083088(-)	BosSINEL	49.06	50.94	524	544	0	524	10	2	1/0	1/0	1/0	1/0	1/0	1/0	1/0	1/0	1/0	1/0	1/0	1/0	1/0	1/0	1/0	1/0	1/0	1/0	1/0	1/0	1/0	1/0	1/0	1/0	1/0	1/0	1/0	1/0	1/0	1/0	1/0	1/0	1/0	1/0	1/0	1/0	1/0	1/0	1/0	1/0
NC_037339.1:42717176-42717445(-)	BosSINEL	50.75	49.25	540	524	15	510	7	4	1/0	1/0	1/0	1/0	1/0	1/0	1/0	1/0	1/0	1/0	1/0	1/0	1/0	1/0	1/0	1/0	1/0	1/0	1/0	1/0	1/0	1/0	1/0	1/0	1/0	1/0	1/0	1/0	1/0	1/0	1/0	1/0	1/0	1/0	1/0	1/0	1/0	1/0	1/0	1/0
NC_037339.1:43984323-43984524(-)	BosSINEL	54.16	45.84	573	485	46	481	2	7	1/0	1/0	1/0	1/0	1/0	1/0	1/0	1/0	1/0	1/0	1/0	1/0	1/0	1/0	1/0	1/0	1/0	1/0	1/0	1/0	1/1	1/0	1/0	1/0	1/1	1/0	1/0	1/0	1/0	1/0	1/1	1/0	1/0	1/0	1/0	1/0	1/0	1/0	1/0	1/1
NC_037339.1:44031357-44031624(-)	BosSINEL	50.47	49.53	535	525	19	497	14	6	1/0	1/0	1/0	1/0	1/0	1/0	1/0	1/0	1/0	1/0	0/0	1/0	1/0	1/0	1/0	1/0	1/0	1/0	1/0	1/0	1/0	1/0	1/0	1/0	1/0	1/0	1/0	1/0	1/0	1/0	1/0	1/0	1/0	1/0	1/0	1/0	1/0	1/0	1/0	1/0
NC_037339.1:45873592-45873729(+)	BosSINEL	51.13	48.87	541	517	24	493	12	7	1/0	1/0	1/0	1/0	1/0	1/0	1/0	1/0	1/0	1/0	1/0	1/0	1/0	1/0	1/0	1/0	1/1	1/0	1/0	1/0	1/0	1/0	1/0	1/0	1/0	1/0	1/0	1/0	1/0	1/0	1/0	1/0	1/0	1/0	1/0	1/0	1/0	1/0	1/0	1/0
NC_037339.1:47484828-47484880(+)	BosSINEL	59.03	40.97	621	431	97	427	2	10	1/0	1/0	1/0	1/0	1/0	1/0	1/0	1/1	1/0	1/0	1/1	1/0	1/0	1/0	1/0	1/1	1/0	1/0	1/0	1/0	1/0	1/0	1/0	1/0	1/0	1/0	1/0	1/0	1/0	1/0	1/0	1/0	1/0	1/0	1/0	1/0	1/1	1/0	1/0	1/0
NC_037339.1:48026750-48026874(-)	BosSINEL	87.45	12.55	920	132	394	132	0	10	1/1	1/1	1/1	1/1	1/1	1/1	1/1	1/1	1/1	1/1	1/1	1/0	1/1	1/1	1/0	1/0	1/1	1/1	1/1	1/0	1/0	1/1	1/1	1/1	1/0	1/0	1/1	1/1	1/0	1/1	1/1	1/1	1/1	1/1	1/1	1/0	1/0	1/1	1/0	1/1
NC_037339.1:48357906-48358172(-)	BosSINEL	57.44	42.56	610	452	86	438	7	5	1/0	1/0	1/0	1/0	1/0	1/0	1/1	1/1	1/0	1/0	1/0	1/1	1/0	1/0	1/0	1/0	1/0	1/0	1/1	1/0	1/1	1/0	1/0	1/0	1/0	1/0	1/0	1/0	1/0	1/0	1/0	1/0	1/0	1/0	1/0	1/0	1/1	1/0	1/0	1/0
NC_037339.1:48699109-48699380(-)	BosSINEL	70.83	29.17	748	308	222	304	2	8	1/1	1/0	1/0	1/0	1/1	1/0	1/1	1/0	1/0	1/1	1/0	1/0	1/0	1/1	1/0	1/1	1/0	1/1	1/1	1/0	1/1	1/1	1/1	1/1	1/0	1/1	1/0	1/0	1/0	1/0	1/1	1/1	1/1	1/0	1/1	1/0	1/0	1/1	1/1	1/0
NC_037339.1:49098478-49098551(+)	BosSINEL	53.27	46.73	554	486	51	452	17	16	1/0	1/0	1/0	1/0	1/0	1/0	1/1	1/0	1/1	1/0	1/0	1/0	1/0	1/0	1/0	1/0	1/0	1/0	1/0	1/0	1/1	1/0	1/0	1/0	1/0	1/0	1/0	1/0	1/0	1/0	1/0	1/0	1/0	1/0	1/0	1/0	1/0	1/0	1/0	1/0
NC_037339.1:49300893-49301168(+)	BosSINEL	58.47	41.53	621	441	100	421	10	5	1/0	1/0	1/0	1/0	1/0	1/0	1/0	1/0	1/0	1/0	1/0	1/0	1/0	1/0	1/0	1/1	1/0	1/0	1/1	1/1	1/0	1/1	1/0	1/0	1/0	1/0	1/0	1/0	1/0	1/0	1/0	1/0	1/0	1/0	1/1	1/0	1/0	1/1	1/0	1/1
NC_037339.1:49397568-49397797(+)	BosSINEL	44.08	55.92	454	576	49	356	110	21	1/1	1/0	0/0	1/0	1/0	1/0	0/0	1/0	0/0	1/0	0/0	1/0	NA	1/0	NA	1/0	1/0	0/0	0/0	1/0	0/0	NA	1/0	1/0	1/0	1/0	1/0	1/0	0/0	0/0	1/0	1/0	0/0	0/0	0/0	1/1	1/0	1/0	1/0	0/0
NC_037339.1:49398127-49398395(+)	BosSINEL	51.6	48.4	548	514	27	494	10	5	1/0	1/0	1/0	1/0	1/0	1/0	1/0	1/0	1/0	1/0	1/0	1/0	1/0	1/0	1/0	1/0	1/0	1/0	1/0	1/0	1/0	1/0	1/0	1/0	1/0	1/0	1/0	1/0	1/0	1/0	1/0	1/0	1/0	1/0	1/0	1/0	1/0	1/0	1/0	1/0
NC_037339.1:49431365-49431486(-)	BosSINEL	50	50	534	534	6	522	6	2	1/0	1/0	1/0	1/0	1/0	1/0	1/0	1/0	1/0	1/0	1/0	1/0	1/0	1/0	1/0	1/0	1/0	1/0	1/0	1/0	1/0	1/0	1/0	1/0	1/0	1/0	1/0	1/0	1/0	1/0	1/0	1/0	1/0	1/0	1/0	1/0	1/0	1/0	1/0	1/0
NC_037339.1:49803329-49803594(-)	BosSINEL	85.25	14.75	890	154	368	154	0	14	1/1	1/1	1/1	1/1	1/1	1/0	1/1	1/0	1/1	1/0	1/0	1/1	1/0	1/1	1/0	1/0	1/1	1/0	1/1	1/1	1/0	1/0	1/0	1/0	1/1	1/1	1/0	1/0	1/1	1/1	1/1	1/0	1/1	1/0	1/1	1/0	1/1	1/1	1/0	1/0
NC_037339.1:51092721-51093000(+)	BosSINEL	80.8	19.2	850	202	328	194	4	10	1/1	1/1	1/1	1/1	1/1	1/0	1/0	1/1	1/1	1/0	1/0	1/0	1/1	1/0	1/1	1/1	1/1	1/0	1/0	1/0	1/0	1/1	1/0	1/1	1/1	1/1	1/1	1/1	1/0	1/0	1/0	1/0	1/0	1/0	1/0	1/1	1/0	1/0	1/1	1/0
NC_037339.1:51098861-51099137(-)	BosSINEL	55.14	44.86	579	471	59	461	5	11	1/0	1/0	1/0	1/0	1/0	1/0	1/0	1/0	1/0	1/0	1/0	1/0	1/0	1/0	1/0	1/0	1/0	1/0	1/0	1/0	1/0	1/0	1/0	1/0	1/0	1/0	1/0	1/0	1/0	1/0	1/0	1/0	1/0	1/0	1/0	1/0	1/0	1/0	1/0	1/0
NC_037339.1:51476008-51476277(+)	BosSINEL	48.78	51.22	521	547	0	521	13	2	1/0	1/0	1/0	1/0	1/0	1/0	1/0	1/0	1/0	1/0	1/0	1/0	1/0	1/0	1/0	1/0	1/0	1/0	1/0	1/0	1/0	1/0	1/0	1/0	1/0	1/0	1/0	1/0	1/0	1/0	1/0	1/0	1/0	1/0	1/0	1/0	1/0	1/0	1/0	1/0
NC_037339.1:53091944-53092075(-)	BosSINEL	48.13	51.87	516	556	1	514	21	0	1/0	1/0	1/0	1/0	1/0	1/0	1/0	1/0	1/0	1/0	1/0	1/0	1/0	1/0	1/0	1/0	1/0	1/0	1/0	1/0	1/0	1/0	1/0	1/0	1/0	1/0	1/0	1/0	1/0	1/0	1/0	1/0	1/0	1/0	1/0	1/0	1/0	1/0	1/0	1/0
NC_037339.1:53194411-53194687(-)	BosSINEL	85.07	14.93	883	155	367	149	3	17	1/1	1/1	1/1	1/1	1/1	1/1	1/1	1/1	1/0	1/1	1/1	1/1	1/1	1/0	1/1	1/0	1/1	1/0	1/0	1/1	1/1	1/1	1/0	1/1	1/0	1/0	1/1	1/0	1/1	1/1	1/0	1/0	1/1	1/1	1/1	1/1	1/0	1/0	1/1	1/1
NC_037339.1:53336822-53337097(+)	BosSINEL	83.24	16.76	874	176	350	174	1	11	1/1	1/1	1/1	1/1	1/1	1/1	1/1	1/1	1/0	1/1	1/1	1/1	1/1	1/0	1/0	1/0	1/1	1/1	1/1	1/1	1/1	1/1	1/0	1/1	1/1	1/1	1/1	1/1	1/0	1/0	1/1	1/1	1/0	1/0	1/1	1/1	1/0	1/1	1/1	1/1
NC_037339.1:53380962-53381086(-)	BosSINEL	49.53	50.47	529	539	1	527	6	2	1/0	1/0	1/0	1/0	1/0	1/0	1/0	1/0	1/0	1/0	1/0	1/0	1/0	1/0	1/0	1/0	1/0	1/0	1/0	1/0	1/0	1/0	1/0	1/0	1/0	1/0	1/0	1/0	1/0	1/0	1/0	1/0	1/0	1/0	1/0	1/0	1/0	1/0	1/0	1/0
NC_037339.1:54256939-54257175(+)	BosSINEL	52.64	47.36	558	502	37	484	9	6	1/0	1/0	1/0	1/0	1/1	1/0	1/0	1/0	1/0	1/0	1/0	1/0	1/0	1/0	1/0	1/0	1/1	1/0	1/0	1/0	1/0	1/0	1/0	1/0	1/0	1/0	1/0	1/0	1/0	1/0	1/0	1/0	1/0	1/0	1/0	1/0	1/0	1/0	1/0	1/0
NC_037339.1:54405969-54406091(+)	BosSINEL	47.85	52.15	513	559	0	513	23	0	1/0	1/0	1/0	1/0	1/0	1/0	1/0	1/0	1/0	1/0	1/0	1/0	1/0	1/0	1/0	1/0	1/0	1/0	1/0	1/0	1/0	1/0	1/0	1/0	1/0	1/0	1/0	1/0	1/0	1/0	1/0	1/0	1/0	1/0	1/0	1/0	1/0	1/0	1/0	1/0
NC_037339.1:54663634-54663772(-)	BosSINEL	66.54	33.46	696	350	174	348	1	13	1/0	1/1	1/0	1/0	1/0	1/0	1/0	1/0	1/0	1/1	1/1	1/1	1/1	1/0	1/1	1/1	1/1	1/0	1/0	1/0	1/0	1/1	1/0	1/0	1/0	1/0	1/0	1/1	1/0	1/0	1/0	1/1	1/0	1/0	1/0	1/1	1/1	1/0	1/0	1/1
NC_037339.1:55303330-55303599(-)	BosSINEL	49.06	50.94	523	543	0	523	10	3	1/0	1/0	1/0	1/0	1/0	1/0	1/0	1/0	1/0	1/0	0/0	1/0	1/0	1/0	1/0	1/0	1/0	1/0	1/0	1/0	1/0	1/0	1/0	1/0	1/0	1/0	1/0	1/0	1/0	1/0	1/0	1/0	1/0	1/0	1/0	1/0	1/0	1/0	1/0	1/0
NC_037339.1:56774792-56775068(+)	BosSINEL	88.76	11.24	932	118	407	118	0	11	1/1	1/0	1/1	1/1	1/0	1/1	1/1	1/1	1/1	1/1	1/1	1/1	1/1	1/0	1/1	1/1	1/1	1/1	1/1	1/1	1/1	1/1	1/1	1/1	1/1	1/1	1/1	1/1	1/1	1/1	1/1	1/0	1/1	1/1	1/1	1/0	1/1	1/1	1/1	1/1
NC_037339.1:57495013-57495118(-)	BosSINEL	85.97	14.03	901	147	377	147	0	12	1/1	1/1	1/0	1/1	1/1	1/1	1/1	1/1	1/0	1/1	1/1	1/1	1/1	1/0	1/0	1/0	1/1	1/1	1/0	1/1	1/1	1/0	1/1	1/1	1/0	1/0	1/1	1/1	1/1	1/0	1/1	1/0	1/1	1/0	1/0	1/1	1/1	1/1	1/1	1/1
NC_037339.1:57943221-57943488(+)	BosSINEL	78.99	21.01	831	221	308	215	3	10	1/1	1/1	1/1	1/1	1/0	NA	1/1	1/0	1/0	0/0	1/1	1/0	1/0	1/1	1/0	1/1	1/0	1/1	1/0	1/0	1/1	1/0	1/0	1/0	1/0	1/0	1/0	1/0	1/1	1/0	1/0	1/1	1/0	1/0	1/0	1/0	1/0	1/0	1/0	1/0
NC_037339.1:58185193-58185364(+)	BosSINEL	86.46	13.54	913	143	385	143	0	8	1/1	1/1	1/1	1/1	1/0	1/1	1/1	1/1	1/0	1/0	1/0	1/1	1/0	1/1	1/1	1/0	1/1	1/1	1/0	1/0	1/1	1/0	1/1	1/0	1/0	1/0	1/0	1/1	1/1	1/1	1/0	1/0	1/0	1/1	1/1	1/0	1/1	1/1	1/1	1/1
NC_037339.1:58569186-58569461(-)	BosSINEL	87.93	12.07	918	126	397	124	1	14	1/0	1/1	1/1	1/1	1/1	1/1	1/1	1/1	1/1	1/1	1/0	1/0	1/0	1/1	1/1	1/1	1/0	1/1	1/0	1/1	1/1	1/1	1/1	1/0	1/1	1/0	1/1	1/1	1/1	1/1	1/1	1/1	1/1	1/1	1/1	1/1	1/1	1/0	1/1	1/1
NC_037339.1:58678869-58679141(-)	BosSINEL	65.25	34.75	689	367	161	367	0	8	1/0	1/0	1/0	1/0	1/0	1/1	1/0	1/1	1/0	1/0	1/0	1/1	1/0	1/0	1/0	1/1	1/0	1/0	1/1	1/0	1/0	1/1	1/0	1/0	1/0	1/0	1/1	1/0	1/1	1/0	1/0	1/0	1/0	1/1	1/0	1/0	1/1	1/0	1/0	1/0
NC_037339.1:58716230-58716483(+)	BosSINEL	87.07	12.93	916	136	390	136	0	10	1/0	1/0	1/0	1/1	1/1	1/1	1/0	1/1	1/1	1/0	1/1	1/1	1/1	1/1	1/1	1/0	1/1	1/1	1/1	1/1	1/1	1/1	1/1	1/0	1/1	1/1	1/1	1/1	1/1	1/1	1/1	1/1	1/1	1/1	1/1	1/1	1/1	1/1	1/0	1/1
NC_037339.1:58841949-58842022(+)	BosSINEL	49.15	50.85	521	539	0	521	9	6	1/0	1/0	1/0	1/0	1/0	1/0	1/0	1/0	1/0	1/0	1/0	1/0	1/0	1/0	1/0	1/0	1/0	1/0	1/0	1/0	1/0	1/0	1/0	1/0	1/0	1/0	1/0	1/0	1/0	1/0	1/0	1/0	1/0	1/0	1/0	1/0	1/0	1/0	1/0	1/0
NC_037339.1:58845026-58845059(+)	BosSINEL	49.62	50.38	526	534	0	526	4	6	1/0	1/0	1/0	1/0	1/0	1/0	1/0	1/0	1/0	1/0	1/0	1/0	1/0	1/0	1/0	1/0	1/0	1/0	1/0	1/0	1/0	1/0	1/0	1/0	1/0	1/0	1/0	1/0	1/0	1/0	1/0	1/0	1/0	1/0	1/0	1/0	1/0	1/0	1/0	1/0
NC_037339.1:58849024-58849157(+)	BosSINEL	51.42	48.58	544	514	24	496	9	7	1/0	1/0	1/0	1/0	1/0	1/0	1/0	1/0	1/0	1/0	1/0	1/0	1/0	1/0	1/0	1/0	1/0	1/0	1/0	1/0	1/0	1/0	1/0	1/0	1/0	1/0	1/0	1/0	1/0	1/0	1/0	1/0	1/0	1/0	1/0	1/0	1/0	1/0	1/0	1/0
NC_037339.1:59348149-59348341(+)	BosSINEL	47.08	52.92	499	561	3	493	34	6	1/0	1/0	1/0	1/0	1/0	1/0	1/0	1/0	1/0	1/0	1/0	1/0	1/0	1/0	1/0	1/0	1/0	1/0	1/0	1/0	1/0	1/0	1/0	1/0	1/0	1/0	1/0	1/0	1/0	1/0	1/0	1/0	1/0	1/0	1/0	1/0	1/0	1/0	1/0	1/0
NC_037339.1:60190807-60190928(+)	BosSINEL	29.53	70.47	316	754	0	316	219	1	0/0	1/0	1/0	0/0	0/0	1/0	1/0	1/0	0/0	0/0	0/0	0/0	1/0	1/0	1/0	1/0	1/0	1/0	1/0	1/0	0/0	0/0	1/0	1/0	0/0	1/0	1/0	1/0	1/0	0/0	0/0	1/0	0/0	1/0	1/0	0/0	1/0	1/0	1/0	1/0
NC_037339.1:60243530-60243806(-)	BosSINEL	49.72	50.28	530	536	4	522	7	3	1/0	1/0	1/0	1/0	1/0	1/0	1/0	1/0	1/0	1/0	1/0	1/0	1/0	1/0	1/0	1/0	1/0	1/0	1/0	1/0	1/0	1/0	1/0	1/0	1/0	1/0	1/0	1/0	1/0	1/0	1/0	1/0	1/0	1/0	1/0	1/0	1/0	1/0	1/0	1/0
NC_037339.1:60935383-60935659(+)	BosSINEL	51.23	48.77	543	517	25	493	12	6	1/0	1/0	1/0	1/0	1/0	1/0	1/0	1/0	1/0	1/0	1/0	1/0	1/0	1/0	1/0	1/0	1/0	1/0	1/0	1/0	1/0	1/0	1/0	1/0	1/0	1/0	1/0	1/0	1/0	1/0	1/0	1/0	1/0	1/0	1/0	1/0	1/0	1/0	1/0	1/0
NC_037339.1:60977509-60977772(+)	BosSINEL	34.81	65.19	369	691	1	367	162	6	1/0	0/0	0/0	1/0	1/0	0/0	1/0	1/0	1/0	1/0	1/0	0/0	1/0	1/0	1/0	1/0	1/0	0/0	1/0	1/0	0/0	1/0	1/0	1/0	1/0	1/0	1/0	1/0	0/0	1/0	0/0	1/0	0/0	1/0	1/0	0/0	1/0	1/0	1/0	1/0
NC_037339.1:60994134-60994397(+)	BosSINEL	38.51	61.49	399	637	16	367	135	18	0/0	1/0	1/0	1/0	1/0	1/0	0/0	1/0	0/0	0/0	1/0	1/0	1/0	1/0	1/0	0/0	1/0	1/0	1/0	0/0	1/0	1/0	1/0	1/0	1/0	1/0	0/0	0/0	1/0	1/0	1/0	1/0	1/0	1/0	1/0	1/0	0/0	1/0	1/0	1/0
NC_037339.1:61130422-61130685(-)	BosSINEL	78.65	21.35	829	225	303	223	1	9	1/0	1/0	1/0	1/0	1/0	1/0	1/1	1/1	1/1	1/0	1/0	1/1	1/1	1/1	1/1	1/1	1/1	1/1	1/1	1/0	1/1	1/1	1/0	1/1	1/1	1/1	1/1	1/1	1/1	1/1	1/1	1/1	1/0	1/1	1/1	1/1	1/1	1/0	1/0	1/0
NC_037339.1:61130958-61131041(-)	BosSINEL	64.38	35.62	676	374	154	368	3	11	1/0	1/0	1/0	1/0	1/0	1/0	1/0	1/1	1/0	1/1	1/1	1/1	1/0	1/1	1/0	1/1	1/0	1/1	1/0	1/1	1/1	1/0	1/0	1/1	1/0	1/1	1/1	1/1	1/0	1/1	1/0	1/0	1/0	1/0	1/1	1/0	1/0	1/1	1/1	1/1
NC_037339.1:61349914-61350175(+)	BosSINEL	75.38	24.62	796	260	269	258	1	8	1/1	1/1	1/0	1/0	1/0	1/0	1/0	1/0	1/1	1/1	1/0	1/1	1/0	1/1	1/1	1/1	1/0	1/0	1/1	1/1	1/0	1/0	1/0	1/0	1/0	1/1	1/0	1/0	1/0	1/1	1/1	1/0	1/1	1/1	1/0	1/1	1/0	1/0	1/0	1/1
NC_037339.1:62699973-62700247(-)	BosSINEL	50.38	49.62	532	524	11	510	7	8	1/0	1/0	1/0	1/0	1/0	1/0	1/0	1/0	1/0	1/0	1/0	1/0	1/0	1/0	1/0	1/0	1/0	1/0	1/0	1/0	1/0	1/0	1/0	1/0	1/0	1/0	1/0	1/0	1/0	1/0	1/0	1/0	1/0	1/0	1/0	1/0	1/0	1/0	1/0	1/0
NC_037339.1:62789421-62789650(+)	BosSINEL	56.56	43.44	595	457	76	443	7	10	1/0	1/0	1/0	1/0	1/0	1/0	1/0	1/0	1/1	1/0	1/0	1/0	1/0	1/0	1/0	1/0	1/0	1/0	1/0	1/0	1/0	1/0	1/0	1/0	1/0	1/0	1/1	1/0	1/0	1/0	1/1	1/0	1/0	1/0	1/0	1/0	1/0	1/0	1/0	1/0
NC_037339.1:63077919-63078194(-)	BosSINEL	58.35	41.65	615	439	97	421	9	9	1/0	1/0	1/1	1/0	1/0	1/1	1/0	1/0	1/0	1/0	1/0	1/0	1/0	1/0	1/0	1/0	1/0	1/0	1/1	1/0	1/0	1/0	1/0	1/0	1/0	1/1	1/0	1/0	1/0	1/0	1/0	1/0	1/0	1/0	1/0	1/0	1/0	1/0	1/0	1/0
NC_037339.1:63116747-63117007(-)	BosSINEL	54.43	45.57	578	484	47	484	0	5	1/0	1/0	1/0	1/0	1/0	1/0	1/0	1/0	1/0	1/0	1/0	1/0	1/0	1/0	1/0	1/0	1/0	1/0	1/0	1/0	1/0	1/0	1/0	1/1	1/0	1/0	1/0	1/0	1/0	1/0	1/0	1/0	1/0	1/0	1/0	1/0	1/0	1/0	1/0	1/0
NC_037339.1:63915995-63916127(-)	BosSINEL	75.29	24.71	792	260	272	248	6	10	1/0	1/1	1/0	1/1	1/0	1/1	1/1	1/1	1/0	1/1	1/0	1/1	1/0	1/0	1/1	1/1	1/0	1/0	1/1	1/0	1/0	1/0	1/1	1/0	1/0	1/1	1/0	1/1	1/0	1/0	1/0	1/0	1/0	1/0	1/1	1/1	1/0	1/0	1/0	1/0
NC_037339.1:64081317-64081592(-)	BosSINEL	65.21	34.79	686	366	166	354	6	10	1/1	1/0	1/0	1/0	1/1	1/0	1/0	1/0	1/0	1/0	1/0	1/0	1/0	1/0	1/1	1/0	1/1	1/0	1/0	1/0	1/0	1/0	1/1	1/0	1/1	1/0	1/0	1/0	1/1	1/1	1/0	1/1	1/0	1/1	1/0	1/0	1/1	1/0	1/0	1/1
NC_037339.1:64538406-64538453(-)	BosSINEL	49.34	50.66	527	541	2	523	9	2	1/0	1/0	1/0	1/0	1/0	1/0	1/0	1/0	1/0	1/0	1/0	1/0	1/0	1/0	1/0	1/0	1/0	1/0	1/0	1/0	1/0	1/0	1/0	1/0	1/0	1/0	1/0	1/0	1/0	1/0	1/0	1/0	1/0	1/0	1/0	1/0	1/0	1/0	1/0	1/0
NC_037339.1:64734702-64734978(+)	BosSINEL	60.82	39.18	635	409	117	401	4	14	1/0	1/1	1/0	1/0	1/1	1/0	1/0	1/0	1/1	1/0	1/0	1/1	1/0	1/0	1/0	1/1	1/0	1/1	1/1	1/0	1/0	1/0	1/0	1/0	1/0	1/0	1/0	1/0	1/0	1/0	1/1	1/0	1/0	1/0	1/0	1/1	1/0	1/0	1/1	1/0
NC_037339.1:64764755-64764946(+)	BosSINEL	69.91	30.09	741	319	211	319	0	6	1/1	1/1	1/0	1/1	1/0	1/1	1/0	1/0	1/1	1/0	1/0	1/0	1/0	1/0	1/0	1/1	1/0	1/0	1/0	1/0	1/1	1/0	1/0	1/0	1/0	1/0	1/0	1/0	1/0	1/0	1/0	1/0	1/0	1/0	1/0	1/0	1/0	1/0	1/0	1/0
NC_037339.1:64808975-64809257(+)	BosSINEL	78.63	21.37	835	227	305	225	1	5	1/0	1/0	1/1	1/0	1/1	1/1	1/1	1/1	1/0	1/1	1/1	1/0	1/0	1/1	1/1	1/0	1/1	1/0	1/0	1/0	1/0	1/0	1/1	1/1	1/1	1/0	1/1	1/1	1/0	1/1	1/0	1/1	1/1	1/1	1/0	1/1	1/0	1/1	1/1	1/1
NC_037339.1:67253241-67253516(-)	BosSINEL	66.06	33.94	695	357	176	343	7	10	1/0	1/0	1/0	1/1	1/0	1/0	1/0	1/0	1/0	1/0	1/0	1/0	1/0	1/0	1/0	1/1	1/0	1/0	1/0	1/1	1/0	1/0	1/0	1/1	1/0	1/0	1/0	1/0	1/0	1/0	1/0	1/0	1/0	1/0	1/0	1/0	1/0	1/0	1/0	1/0
NC_037339.1:67448513-67448787(-)	BosSINEL	74.06	25.94	785	275	257	271	2	6	1/1	1/1	1/1	1/0	1/1	1/0	1/1	1/0	1/1	1/0	1/1	1/0	1/0	1/0	1/1	1/0	1/0	1/0	1/0	1/1	1/1	1/0	1/0	1/1	1/0	1/0	1/0	1/0	1/1	1/1	1/1	1/1	1/1	1/1	1/1	1/0	1/0	1/0	1/0	1/0
NC_037339.1:67494039-67494314(-)	BosSINEL	48.78	51.22	518	544	0	518	13	5	1/0	1/0	1/0	1/0	1/0	1/0	1/0	1/0	1/0	1/0	1/0	1/0	1/0	1/0	1/0	1/0	1/0	1/0	1/0	1/0	1/0	1/0	1/0	1/0	1/0	1/0	1/0	1/0	1/0	1/0	1/0	1/0	1/0	1/0	1/0	1/0	1/0	1/0	1/0	1/0
NC_037339.1:68420833-68421093(-)	BosSINEL	76.93	23.07	817	245	287	243	1	5	1/1	1/0	1/1	1/1	1/1	1/1	1/1	1/0	1/1	1/0	1/0	1/1	1/0	1/0	1/0	1/0	1/0	1/0	1/0	1/0	1/0	1/0	1/1	1/1	1/1	1/1	1/1	1/1	1/1	1/0	1/0	1/0	1/1	1/0	1/1	1/0	1/1	1/0	1/1	1/1
NC_037339.1:68671107-68671379(+)	BosSINEL	49.34	50.66	527	541	0	527	7	2	1/0	1/0	1/0	1/0	1/0	1/0	1/0	1/0	1/0	1/0	1/0	1/0	1/0	1/0	1/0	1/0	1/0	1/0	1/0	1/0	1/0	1/0	1/0	1/0	1/0	1/0	1/0	1/0	1/0	1/0	1/0	1/0	1/0	1/0	1/0	1/0	1/0	1/0	1/0	1/0
NC_037339.1:69098818-69098932(+)	BosSINEL	51.43	48.57	539	509	33	473	18	12	1/0	1/0	1/0	1/0	1/0	1/0	1/0	1/0	1/0	1/0	1/0	1/0	1/0	1/0	1/0	1/0	1/0	1/0	1/0	1/0	1/0	1/0	1/0	1/0	1/0	1/0	1/0	1/0	1/0	1/0	1/0	1/0	1/0	1/0	1/0	1/0	1/0	1/0	1/0	1/0
NC_037339.1:69341315-69341455(-)	BosSINEL	53.11	46.89	563	497	37	489	4	6	1/0	1/0	1/0	1/0	1/0	1/0	1/0	1/0	1/0	1/0	1/0	1/0	1/0	1/0	1/0	1/0	1/0	1/0	1/0	1/0	1/0	1/0	1/0	1/0	1/0	1/0	1/0	1/0	1/0	1/0	1/0	1/0	1/0	1/0	1/0	1/0	1/0	1/0	1/0	1/0
NC_037339.1:69775560-69775684(-)	BosSINEL	64.67	35.33	648	354	178	292	31	35	1/0	1/0	1/0	1/1	1/1	1/0	1/0	NA	1/1	1/0	1/0	1/1	1/0	1/1	1/0	NA	1/1	1/0	1/1	1/1	1/1	1/0	1/0	1/1	1/1	1/1	1/1	1/1	1/0	1/1	1/0	1/1	1/0	1/0	1/0	1/0	1/1	1/1	1/1	1/1
NC_037339.1:69780138-69780262(-)	BosSINEL	66.07	33.93	666	342	184	298	22	32	1/0	1/0	1/0	1/0	NA	0/0	1/1	1/1	1/0	1/0	1/1	1/0	1/1	1/0	1/1	NA	1/1	1/0	1/1	1/0	1/1	1/1	1/0	1/1	1/1	1/1	1/0	1/1	1/1	1/0	1/1	1/0	1/1	1/0	1/0	1/1	1/0	1/1	1/1	1/1
NC_037339.1:69784716-69784840(-)	BosSINEL	77.54	22.46	763	221	286	191	15	44	1/1	1/0	1/1	1/0	1/1	1/0	1/1	1/1	1/1	1/0	1/0	1/0	1/0	1/1	1/1	NA	1/0	1/1	1/1	1/1	1/1	1/1	1/1	1/1	1/1	NA	1/0	1/1	1/1	1/1	1/0	1/0	1/0	1/1	1/1	1/1	0/0	1/1	1/1	1/1
NC_037339.1:69805855-69806074(+)	BosSINEL	40.5	59.5	409	601	30	349	126	31	1/0	1/0	0/0	1/0	0/0	1/0	1/0	1/0	0/0	1/0	1/0	1/0	1/0	0/0	1/0	NA	1/0	0/0	0/0	1/0	0/0	1/0	1/0	1/0	1/0	NA	1/0	1/0	1/0	1/0	1/0	0/0	1/0	1/0	1/0	1/0	1/0	1/0	1/0	1/1
NC_037339.1:70068688-70068949(+)	BosSINEL	24.24	75.76	255	797	28	199	299	10	1/0	0/0	0/0	1/0	0/0	0/0	1/0	1/1	0/0	1/0	1/0	0/0	0/0	0/0	1/0	0/0	0/0	0/0	0/0	1/0	0/0	0/0	1/0	1/0	1/0	0/0	1/0	1/0	0/0	0/0	0/0	0/0	0/0	0/0	1/0	0/0	0/0	0/0	1/1	0/0
NC_037339.1:70169693-70169961(-)	BosSINEL	45.96	54.04	489	575	4	481	47	4	1/0	1/0	1/0	1/0	1/0	1/0	1/0	1/0	1/0	1/0	1/0	1/0	1/0	1/0	1/0	0/0	1/0	1/0	1/0	0/0	1/0	1/0	1/0	1/0	1/0	1/0	1/0	1/0	1/0	1/0	1/0	1/0	1/0	1/0	1/0	1/0	1/0	1/0	1/0	1/0
NC_037339.1:70217705-70217984(+)	BosSINEL	71.66	28.34	741	293	265	211	41	19	1/1	1/1	1/0	1/1	0/0	1/0	NA	1/1	1/1	1/1	1/1	1/1	1/1	1/0	1/1	0/0	1/0	1/0	1/0	0/0	1/1	1/1	1/1	1/0	1/1	0/0	1/0	1/1	1/0	1/0	1/0	1/0	1/1	1/0	1/0	1/0	1/0	1/0	1/1	0/0
NC_037339.1:70248149-70248413(+)	BosSINEL	49.9	50.1	523	525	29	465	30	12	1/0	1/0	1/0	1/0	1/0	1/0	1/0	1/0	1/0	1/0	1/0	1/0	1/0	1/0	1/0	1/0	1/0	1/0	1/0	1/0	1/0	1/0	1/0	1/0	1/0	1/1	1/0	1/0	1/0	1/0	1/0	1/0	1/0	1/0	1/0	1/0	1/0	1/0	1/0	1/0
NC_037339.1:70268952-70269226(+)	BosSINEL	46.68	53.32	492	562	4	484	39	9	1/0	1/0	1/0	1/0	1/0	1/0	1/0	0/0	1/0	1/0	1/0	1/0	1/0	1/0	1/0	1/0	1/0	1/0	1/0	1/0	1/0	1/0	1/0	1/0	1/0	1/0	1/0	1/0	1/0	1/0	1/0	1/0	1/0	1/0	1/0	1/0	1/0	1/0	0/0	1/0
NC_037339.1:70344616-70344890(-)	BosSINEL	89.77	10.23	948	108	420	108	0	8	1/1	1/1	1/0	1/1	1/0	1/0	1/1	1/1	1/1	1/1	1/1	1/1	1/1	1/0	1/1	1/0	1/1	1/0	1/0	1/1	1/1	1/1	1/0	1/0	1/1	1/0	1/1	1/1	1/1	1/1	1/1	1/1	1/1	1/1	1/1	1/1	1/1	1/1	1/1	1/1
NC_037339.1:70357643-70357777(-)	BosSINEL	46.13	53.87	489	571	1	487	42	6	1/0	1/0	1/0	1/0	1/0	1/0	1/0	0/0	1/0	1/0	1/0	1/0	1/0	1/0	1/0	1/0	1/0	1/0	1/0	1/0	1/0	1/0	1/0	1/0	1/0	1/0	0/0	1/0	1/0	1/0	1/0	1/0	1/0	1/0	1/0	1/0	1/0	1/0	0/0	1/0
NC_037339.1:70408079-70408164(-)	BosSINEL	71.86	28.14	756	296	266	224	36	10	1/0	1/1	1/0	1/0	1/1	1/1	1/0	0/0	1/1	1/0	1/0	1/0	1/0	1/1	1/0	1/1	1/0	1/1	1/1	1/0	1/1	1/1	1/0	1/0	1/0	1/1	1/0	1/0	1/0	1/0	1/0	1/1	1/1	1/0	1/0	1/0	1/1	1/0	0/0	1/1
NC_037339.1:70498148-70498423(+)	BosSINEL	72.07	27.93	725	281	240	245	18	33	1/1	1/1	1/0	1/1	1/0	1/0	1/1	NA	1/1	1/1	1/1	1/0	1/1	1/1	1/1	1/1	1/1	1/0	1/0	1/1	1/1	1/0	1/0	1/0	1/1	1/1	1/0	NA	1/1	1/1	1/1	1/0	1/1	1/0	1/0	1/0	1/0	1/1	0/0	1/1
NC_037339.1:70586572-70586848(+)	BosSINEL	71.73	28.27	713	281	223	267	7	39	1/1	1/1	1/0	1/0	1/0	1/0	1/0	NA	1/1	1/1	1/1	1/1	1/0	1/0	1/1	1/0	1/0	1/0	1/0	1/0	1/1	1/1	1/0	1/1	1/1	1/0	1/0	1/0	1/0	1/0	1/0	1/0	1/1	1/0	1/0	1/0	1/0	1/0	NA	1/0
NC_037339.1:70602080-70602345(+)	BosSINEL	47.15	52.85	497	557	15	467	45	9	1/0	1/0	1/0	1/0	1/0	1/0	1/0	0/0	1/0	1/0	1/0	1/0	1/0	1/0	1/0	1/0	1/0	1/0	1/0	1/0	1/0	1/0	1/0	1/0	1/0	1/0	1/0	1/0	1/0	1/0	1/0	1/0	1/0	1/0	1/0	1/0	1/0	1/0	0/0	1/0
NC_037339.1:70638212-70638345(+)	BosSINEL	61.71	38.29	648	402	127	394	4	11	1/0	1/0	1/0	1/0	1/1	1/0	1/1	1/0	1/0	1/0	1/1	1/0	1/0	1/0	1/0	1/1	1/0	1/0	1/0	1/1	1/0	1/0	1/0	1/0	NA	1/0	1/0	1/0	1/0	1/0	1/0	1/0	1/0	1/0	1/0	1/0	1/0	1/0	1/0	1/0
NC_037339.1:70656281-70656544(+)	BosSINEL	49.34	50.66	520	534	29	462	36	9	1/0	1/0	1/0	1/0	1/0	1/0	1/0	0/0	1/0	1/0	1/0	1/0	1/0	1/0	1/0	1/1	1/0	1/0	1/0	1/0	1/0	1/0	1/0	1/0	1/0	1/0	1/0	0/0	1/0	1/0	1/0	1/0	1/0	1/0	1/0	1/0	1/0	1/0	0/0	1/0
NC_037339.1:70722249-70722510(+)	BosSINEL	62.18	37.82	628	382	137	354	14	31	1/1	1/0	1/0	1/0	1/0	1/1	0/0	NA	1/0	1/0	1/0	1/0	1/1	1/0	1/0	1/1	1/0	1/1	1/0	1/1	1/1	1/1	1/0	1/0	1/1	1/0	1/0	1/0	1/0	1/0	1/0	1/0	1/0	1/0	1/0	1/0	1/1	1/0	0/0	1/0
NC_037339.1:70727030-70727281(+)	BosSINEL	49.62	50.38	522	530	55	412	59	10	1/0	1/0	1/0	1/0	1/1	1/0	1/0	0/0	1/0	1/0	1/1	1/0	1/0	1/0	1/0	1/0	1/0	1/0	1/0	1/1	1/0	1/0	1/0	0/0	1/0	1/0	1/0	1/0	1/0	1/0	1/0	1/0	1/0	1/0	1/0	1/0	1/0	1/0	0/0	1/0
NC_037339.1:70825924-70826177(+)	BosSINEL	25.38	74.62	268	788	0	268	260	8	0/0	0/0	1/0	0/0	1/0	1/0	1/0	0/0	0/0	0/0	0/0	1/0	1/0	0/0	0/0	1/0	1/0	1/0	0/0	1/0	0/0	0/0	0/0	0/0	0/0	1/0	1/0	0/0	1/0	1/0	1/0	1/0	0/0	1/0	1/0	1/0	1/0	1/0	0/0	1/0
NC_037339.1:70828897-70828950(-)	BosSINEL	31.21	68.79	329	725	63	203	261	9	0/0	0/0	1/0	0/0	1/1	1/0	1/0	0/0	0/0	0/0	0/0	1/0	1/0	0/0	0/0	1/1	1/0	1/0	1/0	1/0	0/0	0/0	0/0	0/0	0/0	1/1	1/0	0/0	1/0	1/0	1/0	1/0	0/0	1/1	1/0	1/0	1/0	1/0	0/0	1/1
NC_037339.1:70942527-70942778(+)	BosSINEL	24.81	75.19	261	791	5	251	270	10	0/0	0/0	1/0	0/0	1/0	1/0	1/0	0/0	0/0	0/0	0/0	1/0	1/0	0/0	0/0	1/0	1/0	1/0	1/0	1/0	0/0	0/0	0/0	0/0	0/0	1/0	1/0	0/0	1/0	1/0	1/0	1/0	0/0	1/0	1/0	1/0	1/0	1/0	0/0	1/0
NC_037339.1:71025539-71025805(+)	BosSINEL	84.89	15.11	871	155	362	147	4	23	1/1	1/1	1/0	1/0	1/1	1/1	1/1	1/1	1/0	1/1	1/1	1/0	1/1	1/0	1/1	1/0	1/1	1/1	1/0	1/1	1/0	1/0	1/0	1/1	1/1	1/1	1/1	1/1	1/1	1/1	1/1	1/1	1/1	1/1	1/1	1/0	1/0	1/1	1/1	1/0
NC_037339.1:71034722-71034802(-)	BosSINEL	46.18	53.82	495	577	0	495	41	0	1/0	1/0	1/0	1/0	1/0	1/0	1/0	1/0	1/0	1/0	1/0	1/0	1/0	1/0	1/0	1/0	1/0	1/0	1/0	1/0	1/0	1/0	1/0	1/0	1/0	1/0	1/0	1/0	1/0	1/0	1/0	1/0	1/0	1/0	1/0	1/0	1/0	1/0	1/0	1/0
NC_037339.1:71043811-71044077(-)	BosSINEL	82.33	17.67	848	182	343	162	10	21	1/1	1/1	1/1	1/0	1/0	1/1	0/0	1/1	1/0	1/1	1/0	1/1	0/0	1/0	1/0	1/1	1/0	1/0	1/0	1/1	1/0	1/1	1/1	1/0	1/1	1/1	1/1	1/1	1/1	1/0	1/1	1/0	1/1	1/1	1/0	1/0	1/0	1/1	1/0	1/0
NC_037339.1:71240797-71241068(+)	BosSINEL	50.66	49.34	537	523	10	517	3	6	1/0	1/0	1/0	1/0	1/0	1/0	1/0	1/0	1/0	1/0	1/0	1/0	1/0	1/0	1/0	1/0	1/0	1/0	1/0	1/0	1/0	1/0	1/0	1/0	1/0	1/0	1/0	1/0	1/0	1/0	1/0	1/0	1/0	1/0	1/0	1/0	1/0	1/0	1/0	1/0
NC_037339.1:71909987-71910249(-)	BosSINEL	75.45	24.55	756	246	274	208	19	35	1/0	1/1	1/1	1/0	1/0	1/1	1/0	1/0	1/0	1/1	1/0	1/1	1/0	1/0	1/1	1/0	1/0	1/0	1/0	1/1	NA	0/0	1/1	1/0	1/0	1/0	1/1	1/1	1/1	1/0	1/1	1/0	1/1	1/0	1/0	1/1	1/1	1/1	1/1	1/0
NC_037339.1:72307619-72307895(+)	BosSINEL	24.09	75.91	239	753	20	199	277	40	1/0	0/0	1/0	1/0	1/1	1/1	1/0	0/0	1/0	0/0	0/0	0/0	1/0	0/0	1/0	1/0	0/0	1/0	1/0	0/0	0/0	0/0	0/0	0/0	0/0	1/0	1/0	0/0	0/0	0/0	0/0	0/0	1/0	0/0	1/0	0/0	1/0	1/0	0/0	1/0
NC_037339.1:72322550-72322773(+)	BosSINEL	20.38	79.62	216	844	0	216	314	6	1/0	1/0	1/0	1/0	1/0	1/0	1/0	0/0	1/0	0/0	0/0	0/0	1/0	0/0	1/0	1/0	0/0	1/0	1/0	0/0	0/0	0/0	0/0	0/0	0/0	1/0	1/0	0/0	0/0	0/0	0/0	0/0	1/0	0/0	1/0	0/0	1/0	1/0	0/0	1/0
NC_037339.1:72367044-72367308(+)	BosSINEL	33.08	66.92	350	708	1	348	180	7	1/0	0/0	1/0	1/0	1/0	1/0	1/0	1/0	0/0	1/0	1/0	0/0	1/0	1/0	1/0	1/0	0/0	1/0	1/0	1/0	0/0	0/0	1/0	1/0	1/0	1/0	1/0	1/0	0/0	0/0	0/0	0/0	1/0	0/0	1/0	0/0	1/0	1/0	1/0	1/0
NC_037339.1:72417800-72418074(-)	BosSINEL	17.55	82.45	178	836	7	164	336	29	0/0	1/0	0/0	0/0	0/0	0/0	0/0	1/0	0/0	0/0	0/0	1/0	1/0	0/0	0/0	0/0	0/0	NA	NA	1/0	0/0	1/0	0/0	0/0	0/0	1/0	0/0	0/0	1/0	1/0	1/0	0/0	0/0	1/0	0/0	1/0	1/0	1/0	1/0	0/0
NC_037339.1:72520004-72520274(-)	BosSINEL	40.49	59.51	430	632	9	412	110	5	0/0	1/0	0/0	1/0	1/0	1/0	1/0	1/0	1/0	1/0	1/0	1/0	0/0	1/0	1/0	0/0	1/0	0/0	0/0	1/0	0/0	0/0	1/0	1/0	0/0	0/0	1/0	1/0	1/0	1/0	1/0	1/0	1/0	1/0	1/0	1/0	0/0	0/0	1/0	1/0
NC_037339.1:72529420-72529696(-)	BosSINEL	50.95	49.05	539	519	12	515	2	7	1/0	1/0	1/0	1/0	1/0	1/0	1/0	1/0	1/0	1/0	1/0	1/0	1/0	1/0	1/0	1/0	1/0	1/0	1/0	1/0	1/0	1/0	1/0	1/0	1/0	1/0	1/0	1/0	1/0	1/0	1/0	1/0	1/0	1/0	1/0	1/0	1/0	1/0	1/0	1/0
NC_037339.1:72637610-72637885(+)	BosSINEL	51.06	48.94	528	506	55	418	44	19	1/0	1/0	1/0	1/0	1/0	1/0	1/0	1/0	1/0	1/0	1/0	1/0	0/0	1/0	1/0	0/0	1/0	0/0	0/0	1/0	1/1	0/0	1/0	1/0	1/0	1/1	1/0	1/0	1/0	1/0	1/0	1/0	1/0	1/0	1/0	1/0	1/0	1/0	1/0	1/0
NC_037339.1:72855657-72855932(-)	BosSINEL	61.26	38.74	642	406	122	398	4	12	1/0	1/0	1/0	1/0	1/0	1/0	1/0	1/0	1/0	1/1	1/1	1/0	1/1	1/0	1/0	1/1	1/1	1/1	1/1	1/0	1/0	1/0	1/1	1/0	1/0	1/0	1/0	1/0	1/0	1/1	1/0	1/0	1/1	1/0	1/1	1/0	1/0	1/1	1/0	1/0
NC_037339.1:72933943-72934006(+)	BosSINEL	48.88	51.12	522	546	0	522	12	2	1/0	1/0	1/0	1/0	1/0	1/0	1/0	1/0	1/0	1/0	1/0	1/0	1/0	1/0	1/0	1/0	1/0	1/0	1/0	1/0	1/0	1/0	1/0	1/0	1/0	1/0	1/0	1/0	1/0	1/0	1/0	1/0	1/0	1/0	1/0	1/0	1/0	1/0	1/0	1/0
NC_037339.1:73146507-73146685(+)	BosSINEL	80.78	19.22	853	203	329	195	4	8	1/1	1/1	1/1	1/1	1/0	1/1	1/1	1/0	1/0	1/0	1/0	1/0	1/0	1/0	1/0	1/0	1/0	1/0	1/0	1/0	1/0	1/1	1/0	1/1	1/0	1/1	1/1	1/1	1/0	1/1	1/0	1/0	1/0	1/1	1/1	1/0	1/0	1/0	1/1	1/0
NC_037339.1:73240413-73240548(+)	BosSINEL	85.03	14.97	886	156	367	152	2	15	1/0	1/0	1/1	1/0	1/0	1/1	1/1	1/1	1/1	1/1	1/1	1/1	1/1	1/1	1/1	1/0	1/1	1/1	1/1	1/1	1/1	1/1	1/1	1/1	1/1	1/1	1/1	1/1	1/1	1/1	1/1	1/0	1/1	1/1	1/1	1/1	1/1	1/1	1/1	1/1
NC_037339.1:73546530-73546795(-)	BosSINEL	54.08	45.92	570	484	48	474	5	9	1/0	1/0	1/0	1/0	1/0	1/0	1/0	1/0	1/0	1/0	1/0	1/0	1/0	1/0	1/0	1/0	1/0	1/0	1/0	1/0	1/0	1/0	1/0	1/0	1/0	1/0	1/0	1/0	1/0	1/0	1/0	1/0	1/0	1/0	1/0	1/0	1/0	1/0	1/0	1/0
NC_037339.1:73681456-73681728(+)	BosSINEL	57.63	42.37	604	444	90	424	10	12	1/0	1/0	1/0	1/0	1/1	1/0	1/0	1/0	1/1	1/0	1/0	1/0	1/0	1/1	1/1	1/0	1/0	1/1	1/1	1/0	1/0	1/0	1/0	1/1	1/1	1/0	1/0	1/0	1/1	1/0	1/0	1/0	1/1	1/0	1/0	1/0	1/0	1/0	1/0	1/0
NC_037339.1:74584548-74584811(+)	BosSINEL	54.92	45.08	569	467	66	437	15	18	1/0	1/0	1/0	1/0	1/0	0/0	1/0	1/0	1/1	1/0	1/0	1/0	1/0	1/0	1/0	NA	1/0	1/0	1/0	1/1	1/0	1/0	1/0	1/0	1/0	1/0	1/0	1/0	1/0	1/1	1/1	1/0	1/0	1/0	1/0	1/0	1/0	1/0	1/0	1/0
NC_037339.1:74835176-74835312(+)	BosSINEL	75.52	24.48	793	257	269	255	1	11	1/0	1/0	1/0	1/1	1/0	1/1	1/0	1/0	1/0	1/0	1/1	1/1	1/1	1/0	1/1	1/1	1/0	1/1	1/0	1/1	1/1	1/0	1/0	1/1	1/0	1/0	1/1	1/1	1/0	1/0	1/1	1/1	1/0	1/0	1/0	1/0	1/1	1/1	1/1	1/0
NC_037339.1:74939060-74939302(+)	BosSINEL	75.57	24.43	792	256	271	250	3	12	1/0	1/1	1/0	1/1	1/0	1/0	1/0	1/0	1/0	1/0	1/0	1/0	1/0	1/1	1/0	1/0	1/0	1/0	1/0	1/1	1/1	1/0	1/0	1/1	1/0	1/0	1/0	1/0	1/1	1/0	1/0	1/0	1/0	1/0	1/1	1/0	1/1	1/0	1/1	1/0
NC_037339.1:75021110-75021370(-)	BosSINEL	52.55	47.45	557	503	35	487	8	6	1/0	1/0	1/0	1/0	1/0	1/0	1/0	1/0	1/0	1/0	1/0	1/0	1/0	1/0	1/0	1/0	1/1	1/0	1/0	1/0	1/0	1/0	1/0	1/0	1/0	1/0	1/0	1/0	1/0	1/0	1/0	1/0	1/0	1/0	1/0	1/0	1/0	1/0	1/0	1/0
NC_037339.1:75363730-75364006(-)	BosSINEL	65.78	34.22	692	360	170	352	4	10	1/0	1/0	1/0	1/0	1/0	1/0	1/0	1/0	1/0	1/0	1/1	1/0	1/0	1/1	1/0	1/0	1/0	1/0	1/0	1/0	1/0	1/0	1/1	1/0	1/0	1/0	1/0	1/0	1/0	1/0	1/0	1/0	1/0	1/1	1/0	1/1	1/1	1/0	1/0	1/1
NC_037339.1:76532342-76532596(+)	BosSINEL	79.32	20.68	844	220	316	212	4	4	1/0	1/1	1/1	1/0	1/0	1/0	1/1	1/1	1/0	1/1	1/1	1/1	1/1	1/0	1/1	1/1	1/1	1/1	1/0	1/1	1/1	1/0	1/1	1/1	1/1	1/1	1/1	1/1	1/0	1/1	1/0	1/0	1/1	1/1	1/0	1/1	1/1	1/1	1/0	1/0
NC_037339.1:77545020-77545289(-)	BosSINEL	49.44	50.56	528	540	0	528	6	2	1/0	1/0	1/0	1/0	1/0	1/0	1/0	1/0	1/0	1/0	1/0	1/0	1/0	1/0	1/0	1/0	1/0	1/0	1/0	1/0	1/0	1/0	1/0	1/0	1/0	1/0	1/0	1/0	1/0	1/0	1/0	1/0	1/0	1/0	1/0	1/0	1/0	1/0	1/0	1/0
NC_037339.1:77779912-77780301(-)	BosSINEL	53.99	46.01	568	484	54	460	12	10	1/0	1/0	1/0	1/1	1/0	1/0	1/0	1/1	1/0	1/0	1/0	1/0	1/0	1/0	1/0	1/0	1/0	1/0	1/0	1/0	1/0	1/0	1/0	1/0	1/0	1/0	1/0	1/0	1/0	1/0	1/0	1/0	1/0	1/0	1/0	1/0	1/0	1/0	1/0	1/0
NC_037339.1:80442200-80442475(-)	BosSINEL	81.72	18.28	863	193	336	191	1	8	1/1	1/1	1/0	1/1	1/1	1/1	1/0	1/0	1/0	1/1	1/0	1/0	1/1	1/0	1/1	1/0	1/1	1/1	1/1	1/0	1/1	1/1	1/1	1/1	1/1	1/1	1/1	1/1	1/0	1/1	1/1	1/1	1/1	1/1	1/0	1/1	1/1	1/1	1/0	1/1
NC_037339.1:82386788-82386882(-)	BosSINEL	46	54	460	540	56	348	96	36	1/0	1/0	1/0	1/0	1/0	1/0	1/0	1/1	1/0	1/0	1/0	1/0	1/0	1/0	1/0	0/0	1/0	0/0	1/1	NA	1/0	1/0	1/0	1/0	NA	1/0	1/1	1/0	NA	1/0	1/0	1/0	1/0	1/0	1/0	1/0	1/0	0/0	1/0	1/0
NC_037339.1:82389625-82389898(+)	BosSINEL	48.97	51.03	525	547	0	525	11	0	1/0	1/0	1/0	1/0	1/0	1/0	1/0	1/0	1/0	1/0	1/0	1/0	1/0	1/0	1/0	1/0	1/0	1/0	1/0	1/0	1/0	1/0	1/0	1/0	1/0	1/0	1/0	1/0	1/0	1/0	1/0	1/0	1/0	1/0	1/0	1/0	1/0	1/0	1/0	1/0
NC_037339.1:83159544-83159820(-)	BosSINEL	49.81	50.19	528	532	5	518	7	6	1/0	1/0	1/0	1/0	1/0	1/0	1/0	1/0	1/0	1/0	1/0	1/0	1/0	1/0	1/0	1/0	1/0	1/0	1/0	1/0	1/0	1/0	1/0	1/0	1/0	1/0	1/0	1/0	1/0	1/0	1/0	1/0	1/0	1/0	1/0	1/0	1/0	1/0	1/0	1/0
NC_037339.1:83333685-83333742(-)	BosSINEL	50.1	49.9	521	519	2	517	1	16	1/0	1/0	1/0	1/0	1/0	1/0	1/0	1/0	1/0	1/0	1/0	1/0	1/0	1/0	1/0	1/0	1/0	1/0	1/0	1/0	1/0	1/0	1/0	1/0	1/0	1/0	1/0	1/0	1/0	1/0	1/0	1/0	1/0	1/0	1/0	1/0	1/0	1/0	1/0	1/0
NC_037339.1:83424900-83425176(-)	BosSINEL	60.84	39.16	640	412	121	398	7	10	1/0	1/0	1/0	1/0	1/0	1/0	1/1	1/1	1/1	1/0	1/0	1/0	1/0	1/0	1/1	1/0	1/0	1/0	1/1	1/0	1/0	1/0	1/0	1/0	1/0	1/0	1/0	1/1	1/0	1/0	1/0	1/0	1/0	1/0	1/0	1/0	1/0	1/0	1/0	1/0
NC_037339.1:83771026-83771295(+)	BosSINEL	53.58	46.42	568	492	52	464	14	6	1/0	1/0	1/0	1/0	1/0	1/0	1/0	1/0	1/1	1/0	1/0	1/0	1/0	1/0	1/0	1/0	1/0	1/0	1/0	1/0	1/0	1/1	1/0	1/0	1/0	1/0	1/0	1/0	1/0	1/0	1/0	1/0	1/0	1/0	1/0	1/0	1/0	1/0	1/0	1/0
NC_037339.1:85374802-85374928(+)	BosSINEL	50.85	49.15	540	522	20	500	11	5	1/0	1/0	1/0	1/0	1/0	1/0	1/0	1/0	1/0	1/0	1/0	1/0	1/0	1/0	1/0	1/0	1/0	1/1	1/0	1/0	1/0	1/0	1/0	1/0	1/0	1/0	1/0	1/0	1/0	1/0	1/0	1/0	1/0	1/0	1/0	1/0	1/0	1/0	1/0	1/0
NC_037339.1:86126116-86126248(+)	BosSINEL	64.2	35.8	678	378	153	372	3	8	1/0	1/1	1/0	1/0	1/0	1/0	1/0	1/0	1/0	1/0	1/0	1/0	1/0	1/0	1/0	1/0	1/0	1/0	1/0	1/0	1/0	1/0	1/0	1/0	1/0	1/0	1/0	1/0	1/0	1/0	1/0	1/0	1/0	1/0	1/0	1/0	1/0	1/0	1/0	1/0
NC_037339.1:87103495-87103753(+)	BosSINEL	48.78	51.22	521	547	7	507	20	2	1/0	1/0	1/0	1/0	1/0	1/0	1/0	1/0	1/0	1/0	1/0	1/0	1/0	1/0	1/0	1/0	1/0	1/0	1/0	1/0	1/0	1/0	1/0	1/0	1/0	1/0	1/0	1/0	1/0	1/0	1/0	1/0	1/0	1/0	1/0	1/0	1/0	1/0	1/0	1/0
NC_037339.1:87106502-87106777(+)	BosSINEL	48.88	51.12	522	546	0	522	12	2	1/0	1/0	1/0	1/0	1/0	1/0	1/0	1/0	1/0	1/0	1/0	1/0	1/0	1/0	1/0	1/0	1/0	1/0	1/0	1/0	1/0	1/0	0/0	1/0	1/0	1/0	1/0	1/0	1/0	1/0	1/0	1/0	1/0	1/0	1/0	1/0	1/0	1/0	1/0	1/0
NC_037339.1:87111880-87112151(+)	BosSINEL	49.53	50.47	525	535	6	513	11	6	1/0	1/0	1/0	1/0	1/0	1/0	1/0	1/0	1/0	1/0	1/0	1/0	1/0	1/0	1/0	1/0	1/0	1/0	1/0	1/0	1/0	1/0	1/0	1/0	1/0	1/0	1/0	1/0	1/0	1/0	1/0	1/0	1/0	1/0	1/0	1/0	1/0	1/0	1/0	1/0
NW_020191445.1:18969-19243(-)	BosSINEL	26.78	73.22	286	782	1	284	249	2	1/0	0/0	1/0	1/0	1/0	1/0	0/0	1/0	0/0	1/0	0/0	0/0	1/0	0/0	1/0	0/0	0/0	0/0	1/0	0/0	1/0	1/0	1/0	0/0	1/0	1/0	0/0	0/0	0/0	0/0	0/0	0/0	0/0	0/0	0/0	0/0	1/0	1/0	0/0	0/0
NW_020191467.1:61709-61983(-)	BosSINEL	55.94	44.06	593	467	63	467	0	6	1/0	1/0	1/0	1/0	1/0	1/0	1/0	1/0	1/0	1/0	1/0	1/0	1/0	1/0	1/0	1/0	1/0	1/0	1/0	1/0	1/0	1/0	1/0	1/0	1/0	1/0	1/1	1/0	1/0	1/0	1/0	1/0	1/0	1/0	1/0	1/0	1/0	1/0	1/1	1/0
NW_020191471.1:114968-115244(-)	BosSINEL	68.68	31.32	728	332	199	330	1	6	1/0	1/1	1/1	1/0	1/0	1/0	1/0	1/0	1/0	1/0	1/0	1/0	1/0	1/0	1/0	1/0	1/0	1/0	1/0	1/0	1/0	1/0	1/1	1/1	1/0	1/0	1/0	1/0	1/0	1/0	1/0	1/1	1/1	1/0	1/0	1/0	1/0	1/0	1/0	1/0
NW_020191484.1:34247-34448(+)	BosSINEL	27.75	72.25	293	763	4	285	239	8	1/0	1/0	1/0	0/0	1/0	1/0	1/0	0/0	1/0	0/0	0/0	1/0	1/0	0/0	0/0	1/0	1/0	1/0	1/0	0/0	0/0	1/0	0/0	0/0	0/0	1/0	1/0	0/0	1/0	1/0	1/0	1/0	0/0	1/0	1/0	0/0	1/0	1/0	1/0	1/0
NW_020191494.1:38898-39173(+)	BosSINEL	45.09	54.91	477	581	1	475	53	7	1/0	1/0	1/0	1/0	1/0	1/0	1/0	1/0	1/0	1/0	1/0	1/0	1/0	0/0	1/0	1/0	1/0	1/0	1/0	0/0	1/0	1/0	1/0	1/0	1/0	1/0	1/0	1/0	1/0	1/0	1/0	1/0	1/0	1/0	1/0	1/0	1/0	1/0	1/0	1/0
NW_020191494.1:67043-67319(+)	BosSINEL	65.41	34.59	692	366	171	350	8	7	1/0	1/1	1/1	1/1	1/0	1/0	1/0	1/0	1/0	1/0	1/0	1/0	1/0	1/0	1/0	1/0	1/0	1/0	1/0	1/0	1/0	1/0	1/0	1/0	0/0	1/0	1/0	1/0	1/0	1/0	1/0	1/0	1/0	1/0	1/0	1/0	1/0	1/0	1/0	1/0
NW_020191494.1:225979-226254(+)	BosSINEL	46.67	53.33	490	560	1	488	36	11	1/0	1/0	1/0	1/0	1/0	1/0	1/0	1/0	1/0	1/0	1/0	1/0	1/0	1/0	1/0	0/0	1/0	1/0	1/0	NA	1/0	1/0	1/0	1/0	1/0	1/0	1/0	1/0	1/0	0/0	1/0	1/0	0/0	1/0	1/0	1/0	1/0	1/0	1/0	1/0
NW_020191494.1:285235-285511(-)	BosSINEL	48.57	51.43	511	541	14	483	29	10	1/0	1/0	1/0	1/0	1/0	1/0	1/0	1/0	1/0	1/0	1/0	1/0	1/0	1/0	1/0	1/0	1/0	1/0	1/0	1/0	1/0	1/0	1/0	0/0	1/0	1/0	1/0	1/0	1/0	1/0	1/0	1/0	0/0	1/0	1/0	1/0	1/1	1/0	1/0	1/0
NW_020191512.1:25401-25673(+)	BosSINEL	51.31	48.69	549	521	19	511	5	1	1/0	1/0	1/0	1/0	1/0	1/0	1/0	1/0	1/0	1/0	1/0	1/0	1/0	1/0	1/0	1/0	1/0	1/0	1/0	1/0	1/0	1/0	1/0	1/0	1/0	1/0	1/0	1/0	1/0	1/0	1/0	1/0	1/0	1/0	1/0	1/0	1/0	1/0	1/0	1/0
NW_020191531.1:30686-30962(-)	BosSINEL	49.72	50.28	531	537	1	529	4	2	1/0	1/0	1/0	1/0	1/0	1/0	1/0	1/0	1/0	1/0	1/0	1/0	1/0	1/0	1/0	1/0	1/0	1/0	1/0	1/0	1/0	1/0	1/0	1/0	1/0	1/0	1/0	1/0	1/0	1/0	1/0	1/0	1/0	1/0	1/0	1/0	1/0	1/0	1/0	1/0
NW_020191539.1:75359-75633(-)	BosSINEL	50	50	521	521	18	485	18	15	1/0	1/0	1/0	1/0	1/0	1/0	1/0	1/0	1/0	1/0	1/0	1/0	1/0	1/0	1/0	1/0	1/0	1/0	1/0	1/0	1/0	1/0	1/0	1/1	1/0	1/0	1/0	1/0	1/0	1/0	1/0	1/0	1/0	1/0	1/0	1/0	1/0	1/0	1/0	1/0
NW_020191539.1:84181-84455(+)	BosSINEL	58.94	41.06	613	427	107	399	14	16	1/0	1/0	1/0	1/0	1/1	1/0	1/1	1/0	0/0	1/0	1/0	0/0	0/0	1/1	1/0	1/0	1/0	1/0	1/0	0/0	1/0	1/0	1/1	1/0	1/0	1/0	1/0	1/0	1/1	1/0	1/0	1/0	1/0	1/0	1/0	1/0	1/0	1/0	1/0	1/0
NW_020191540.1:28620-28893(+)	BosSINEL	49.53	50.47	525	535	0	525	5	6	1/0	1/0	1/0	1/0	1/0	1/0	1/0	1/0	1/0	1/0	1/0	1/0	1/0	1/0	1/0	1/0	1/0	1/0	1/0	1/0	1/0	1/0	1/0	1/0	1/0	1/0	1/0	1/0	1/0	1/0	1/0	1/0	1/0	1/0	1/0	1/0	1/0	1/0	1/0	1/0
NC_037340.1:272890-273014(+)	BosSINEL	59.58	40.42	622	422	106	410	6	14	1/0	1/0	1/0	1/0	1/0	1/0	1/0	1/0	1/0	1/0	1/0	1/1	1/0	1/0	1/0	1/0	1/0	1/0	1/0	1/0	1/0	1/0	1/0	1/0	1/0	1/0	1/0	1/0	1/0	1/1	1/0	1/0	1/0	1/0	1/0	1/0	1/1	1/0	1/0	1/0
NC_037340.1:286246-286521(+)	BosSINEL	52.55	47.45	557	503	31	495	4	6	1/0	1/0	1/0	1/0	1/0	1/0	1/0	1/0	1/0	1/0	1/0	1/0	1/0	1/0	1/0	1/0	1/0	1/0	1/0	1/0	1/0	1/0	1/0	1/0	1/0	1/0	1/0	1/0	1/0	1/0	1/0	1/0	1/0	1/0	1/0	1/0	1/0	1/0	1/0	1/0
NC_037340.1:421297-421426(+)	BosSINEL	55.15	44.85	578	470	59	460	5	12	1/0	1/0	1/0	1/0	1/0	1/0	1/0	1/0	1/0	1/0	1/0	1/1	1/0	1/0	1/0	1/0	1/0	1/0	1/0	1/0	1/0	1/0	1/0	1/0	1/1	1/0	1/1	1/0	1/0	1/1	1/0	1/1	1/0	1/0	1/0	1/0	1/0	1/0	1/0	1/0
NC_037340.1:466996-467272(+)	BosSINEL	55.88	44.12	589	465	65	459	3	9	1/0	1/0	1/0	1/0	1/0	1/0	1/0	1/0	1/0	1/0	1/1	1/0	1/0	1/0	1/1	1/1	1/0	1/1	1/0	1/0	1/1	1/0	1/0	1/0	1/0	1/0	1/0	1/0	1/0	1/0	1/0	1/0	1/0	1/0	1/1	1/0	1/0	1/0	1/0	1/0
NC_037340.1:1373335-1373610(-)	BosSINEL	49.81	50.19	532	536	8	516	10	2	1/0	1/0	1/0	1/0	1/0	1/0	1/0	1/0	1/1	1/0	1/0	1/0	1/0	1/0	1/0	1/0	0/0	1/0	1/0	1/0	1/0	1/0	1/0	1/0	1/0	1/0	1/0	1/0	1/0	1/0	1/0	1/0	1/0	1/0	1/0	1/0	1/0	1/0	1/0	1/0
NC_037340.1:1808739-1809014(+)	BosSINEL	85.52	14.48	898	152	375	148	2	11	1/1	1/1	1/1	1/1	1/0	1/0	1/1	1/0	1/0	1/1	1/1	1/1	1/0	1/0	1/0	1/0	1/1	1/1	1/0	1/0	1/1	1/1	1/1	1/1	1/1	1/0	1/0	1/0	1/0	1/0	1/1	1/0	1/0	1/0	1/1	1/1	1/1	1/0	1/0	1/1
NC_037340.1:2755533-2755676(-)	BosSINEL	52.36	47.64	555	505	36	483	11	6	1/0	1/0	1/0	1/0	1/0	1/1	1/0	1/0	1/0	1/0	1/1	1/0	1/0	1/0	1/0	1/1	1/0	1/0	1/0	1/0	1/1	1/0	1/0	1/1	1/0	1/0	1/0	1/0	1/0	1/0	1/0	1/0	1/0	1/1	1/0	1/0	1/1	1/0	1/0	1/0
NC_037340.1:2786371-2786650(-)	BosSINEL	48.13	51.87	514	554	2	510	22	2	1/0	1/0	1/0	1/0	1/0	1/0	1/0	1/0	1/0	1/0	1/0	1/0	1/0	1/0	1/0	1/0	1/0	1/0	1/0	1/0	1/0	1/0	1/0	1/0	1/0	1/0	1/0	1/0	1/0	1/0	1/0	1/0	1/0	1/0	1/0	1/0	1/0	1/0	1/0	1/0
NC_037340.1:2961819-2962064(+)	BosSINEL	82.56	17.44	857	181	339	179	1	17	1/1	1/1	1/0	1/0	1/1	1/1	1/0	1/1	1/1	1/1	1/0	1/1	1/1	1/1	1/1	1/1	1/0	1/1	1/0	1/1	1/1	1/1	1/1	1/1	1/0	1/1	1/1	1/1	1/0	1/1	1/1	1/1	1/1	1/0	1/1	1/1	1/0	1/1	1/0	1/1
NC_037340.1:3031704-3031976(-)	BosSINEL	89.5	10.5	929	109	411	107	1	17	1/1	1/1	1/0	1/1	1/1	1/1	1/1	1/1	1/0	1/1	1/1	1/1	1/0	1/1	1/1	1/1	1/1	1/1	1/1	1/1	1/1	1/1	1/1	1/0	1/1	1/1	1/1	1/1	1/1	1/1	1/1	1/1	1/0	1/0	1/1	1/1	1/1	1/1	1/1	1/0
NC_037340.1:3213345-3213478(-)	BosSINEL	56.74	43.26	598	456	80	438	9	9	1/0	1/0	1/0	1/0	1/0	1/0	1/0	1/0	1/0	1/0	1/0	1/0	1/0	1/0	1/0	1/0	1/0	1/0	1/0	1/0	1/0	1/0	1/0	1/0	1/0	1/0	1/0	1/0	1/0	1/0	1/0	1/0	1/0	1/0	1/0	1/0	1/0	1/0	1/0	1/0
NC_037340.1:3255989-3256089(+)	BosSINEL	64.83	35.17	682	370	163	356	7	10	1/0	1/0	1/1	1/0	1/1	1/0	1/0	1/0	1/1	1/0	1/0	1/0	1/1	1/1	1/1	1/1	1/0	1/0	1/0	1/1	1/1	1/0	1/0	1/0	1/0	1/0	1/0	1/1	1/0	1/1	1/0	1/0	1/0	1/1	1/0	1/0	1/0	1/0	1/1	1/0
NC_037340.1:3344673-3344798(-)	BosSINEL	83.4	16.6	874	174	352	170	2	12	1/1	1/1	1/1	1/1	1/0	1/0	1/1	1/0	1/0	1/1	1/0	1/0	1/0	1/0	1/0	1/1	1/0	1/1	1/1	1/0	1/0	1/0	1/0	1/1	1/0	1/0	1/1	1/0	1/0	1/1	1/0	1/0	1/1	1/0	1/0	1/0	1/0	1/0	1/1	1/0
NC_037340.1:3424546-3424822(+)	BosSINEL	78.78	21.22	824	222	305	214	4	13	1/0	1/1	1/0	1/1	1/1	1/1	1/1	1/0	1/1	1/1	1/1	1/1	1/0	1/1	1/1	1/1	1/1	1/1	1/1	1/1	1/1	1/1	1/0	1/0	1/0	1/1	1/1	1/1	1/0	1/0	1/0	1/0	1/1	1/1	1/1	1/1	1/1	1/1	1/0	1/0
NC_037340.1:5331644-5331914(+)	BosSINEL	72.35	27.65	764	292	239	286	3	8	1/1	1/1	1/1	1/0	1/0	1/1	1/1	1/0	1/1	1/0	1/0	1/0	1/0	1/0	1/0	1/0	1/1	1/1	1/0	1/0	1/0	1/1	1/0	1/1	1/0	1/0	1/0	1/0	1/0	1/0	1/1	1/0	1/0	1/0	1/0	1/0	1/0	1/0	1/1	1/0
NC_037340.1:5818083-5818356(-)	BosSINEL	89.56	10.44	901	105	402	97	4	33	1/1	1/1	1/1	1/1	1/1	1/1	1/1	1/1	1/1	1/1	1/1	1/0	1/1	1/1	1/1	1/1	1/1	1/0	1/1	1/0	1/0	1/1	1/1	1/1	1/1	1/0	1/0	1/0	1/0	1/1	1/0	1/1	1/1	1/1	1/1	1/1	1/1	1/1	1/0	1/0
NC_037340.1:6224207-6224482(-)	BosSINEL	27.03	72.97	286	772	2	282	245	7	0/0	1/0	1/0	1/0	0/0	0/0	1/0	0/0	1/0	1/0	1/0	1/0	1/0	0/0	0/0	1/0	1/0	0/0	1/0	0/0	1/0	0/0	0/0	0/0	1/0	1/0	0/0	0/0	0/0	0/0	0/0	0/0	0/0	0/0	1/0	1/0	0/0	0/0	1/0	1/0
NC_037340.1:6252211-6252485(+)	BosSINEL	89.81	10.19	934	106	414	106	0	16	1/1	1/0	1/1	1/1	1/1	1/1	1/1	1/0	1/1	1/1	1/1	1/1	1/1	1/1	1/0	1/0	1/0	1/1	1/1	1/0	1/0	1/1	1/1	1/1	1/1	1/0	1/1	1/1	1/1	1/1	1/1	1/0	1/1	1/1	1/1	1/1	1/1	1/1	1/1	1/1
NC_037340.1:6605606-6605882(+)	BosSINEL	60.17	39.83	639	423	111	417	3	5	1/0	1/0	1/0	1/0	1/0	1/0	1/0	1/0	1/0	1/0	1/0	1/0	1/1	1/0	1/1	1/0	1/0	1/0	1/0	1/0	1/0	1/0	1/0	1/0	1/0	1/1	1/0	1/0	1/0	1/1	1/0	1/0	1/0	1/1	1/0	1/0	1/0	1/0	1/0	1/0
NC_037340.1:6679536-6679805(-)	BosSINEL	51.03	48.97	544	522	18	508	7	3	1/0	1/0	1/0	1/0	1/0	1/0	1/0	1/0	1/0	1/0	1/0	1/0	1/0	1/0	1/0	1/0	1/0	1/0	1/0	1/0	1/0	1/0	1/0	1/0	1/0	1/0	1/0	1/0	1/0	1/0	1/0	1/0	1/0	1/0	1/0	1/0	1/0	1/0	1/0	1/0
NC_037340.1:6955038-6955165(-)	BosSINEL	52.26	47.74	554	506	32	490	8	6	1/0	1/0	1/0	1/0	1/1	1/1	1/0	1/0	1/0	1/0	1/0	1/0	1/0	1/0	1/0	1/0	1/0	1/0	1/0	1/0	1/0	1/0	1/0	1/0	1/0	1/0	1/0	1/0	1/0	1/0	1/0	1/0	1/0	1/0	1/0	1/0	1/0	1/0	1/0	1/0
NC_037340.1:7202951-7203226(-)	BosSINEL	51.51	48.49	545	513	30	485	14	7	1/0	1/0	1/0	1/0	1/0	1/0	1/0	1/0	1/0	1/0	1/0	1/0	1/1	1/0	1/0	1/0	1/0	1/0	1/0	1/0	1/0	1/0	1/0	1/0	1/0	1/0	1/0	1/0	0/0	1/0	1/0	1/0	1/0	1/0	1/0	1/0	1/0	1/0	1/0	1/0
NC_037340.1:7456679-7456741(-)	BosSINEL	50.56	49.44	540	528	12	516	6	2	1/0	1/0	1/0	1/0	1/0	1/0	1/0	1/0	1/0	1/0	1/0	1/0	1/0	1/0	1/0	1/0	1/0	1/0	1/0	1/0	1/0	1/0	1/0	1/0	1/0	1/0	1/0	1/0	1/0	1/0	1/0	1/0	1/0	1/0	1/0	1/0	1/0	1/0	1/0	1/0
NC_037340.1:8260042-8260317(-)	BosSINEL	52.36	47.64	555	505	27	501	2	6	1/0	1/0	1/0	1/0	1/0	1/0	1/0	1/0	1/0	1/0	1/0	1/0	1/0	1/0	1/0	1/0	1/0	1/0	1/0	1/0	1/0	1/0	1/0	1/0	1/0	1/0	1/0	1/0	1/0	1/0	1/0	1/0	1/0	1/0	1/0	1/0	1/0	1/0	1/0	1/0
NC_037340.1:8310255-8310383(-)	BosSINEL	64.88	35.12	689	373	165	359	7	5	1/0	1/1	1/0	1/0	1/0	1/0	1/0	1/1	1/0	1/1	1/0	1/1	1/1	1/0	1/0	1/0	1/1	1/1	1/0	1/1	1/0	1/0	1/0	1/0	1/0	1/0	1/0	1/0	1/0	1/0	1/1	1/0	1/0	1/0	1/1	1/0	1/0	1/0	1/0	1/0
NC_037340.1:8676950-8677225(-)	BosSINEL	57.24	42.76	609	455	83	443	6	4	1/0	1/0	1/0	1/0	1/1	1/0	1/0	1/0	1/0	1/1	1/0	1/0	1/0	1/0	1/0	1/0	1/0	1/0	1/0	1/0	1/0	1/0	1/0	1/0	1/0	1/0	1/0	1/0	1/0	1/0	1/0	1/0	1/0	1/0	1/0	1/0	1/0	1/1	1/0	1/0
NC_037340.1:9168377-9168652(+)	BosSINEL	52.81	47.19	564	504	38	488	8	2	1/0	1/0	1/0	1/0	1/0	1/0	1/0	1/0	1/0	1/0	1/0	1/0	1/0	1/0	1/0	1/0	1/0	1/0	1/0	1/0	1/0	1/0	1/0	1/0	1/0	1/0	1/0	1/0	1/0	1/0	1/1	1/0	1/0	1/0	1/0	1/0	1/0	1/0	1/0	1/0
NC_037340.1:9628044-9628307(-)	BosSINEL	49.44	50.56	530	542	0	530	6	0	1/0	1/0	1/0	1/0	1/0	1/0	1/0	1/0	1/0	1/0	1/0	1/0	1/0	1/0	1/0	1/0	1/0	1/0	1/0	1/0	1/0	1/0	1/0	1/0	1/0	1/0	1/0	1/0	1/0	1/0	1/0	1/0	1/0	1/0	1/0	1/0	1/0	1/0	1/0	1/0
NC_037340.1:9727034-9727175(+)	BosSINEL	76.47	23.53	806	248	283	240	4	9	1/1	1/0	1/0	1/0	1/1	1/0	1/1	1/0	1/1	1/0	1/1	1/0	1/1	1/0	1/0	1/1	1/0	1/1	1/1	1/0	1/1	1/0	1/0	1/1	1/0	1/0	1/1	1/1	1/1	1/1	1/0	1/0	1/0	1/1	1/0	1/1	1/0	1/1	1/0	1/1
NC_037340.1:9919282-9919548(+)	BosSINEL	49.81	50.19	528	532	6	516	8	6	1/0	1/0	1/0	1/0	1/0	1/0	1/0	1/0	1/0	1/0	1/0	1/0	1/0	1/0	1/0	1/0	1/0	1/0	1/0	1/0	1/0	1/0	1/0	1/0	1/0	1/0	1/0	1/0	1/0	1/0	1/0	1/0	1/0	1/0	1/0	1/0	1/0	1/0	1/0	1/0
NC_037340.1:10257847-10258114(-)	BosSINEL	89.62	10.38	932	108	413	106	1	16	1/1	1/1	1/1	1/1	1/0	1/1	1/1	1/1	1/0	1/1	NA	1/0	1/0	1/1	1/1	1/1	1/1	1/1	1/0	1/0	1/0	1/0	1/1	1/1	1/0	1/1	1/1	1/1	1/1	1/1	1/1	1/1	1/0	1/0	1/1	1/1	1/1	1/1	1/1	1/0
NC_037340.1:10679639-10679914(+)	BosSINEL	53.58	46.42	568	492	38	492	0	6	1/0	1/0	1/0	1/0	1/0	1/0	1/0	1/0	1/0	1/0	1/0	1/0	1/0	1/0	1/0	1/1	1/0	1/0	1/0	1/0	1/0	1/0	1/0	1/0	1/0	1/0	1/1	1/0	1/0	1/0	1/0	1/0	1/0	1/0	1/0	1/0	1/0	1/0	1/0	1/0
NC_037340.1:10784566-10784645(-)	BosSINEL	68.63	31.37	722	330	197	328	1	10	1/0	1/0	1/0	1/0	1/1	1/1	1/1	1/0	1/0	1/0	1/0	1/1	1/1	1/1	1/0	1/1	1/0	1/1	1/0	1/0	1/1	1/0	1/0	1/1	1/1	1/1	1/0	1/0	1/0	1/0	1/1	1/0	1/0	1/1	1/0	1/0	1/0	1/1	1/0	1/1
NC_037340.1:10790149-10790394(+)	BosSINEL	49.72	50.28	526	532	8	510	11	7	1/0	1/0	1/0	1/0	1/0	1/0	1/0	1/0	1/0	1/0	1/0	1/0	1/0	1/0	1/0	1/0	1/0	1/0	1/0	1/0	1/0	1/0	1/0	1/0	1/0	1/0	1/0	1/0	1/0	1/0	1/0	1/0	1/0	1/0	1/0	1/0	1/0	1/0	1/0	1/0
NC_037340.1:10863711-10863986(-)	BosSINEL	54.25	45.75	575	485	45	485	0	6	1/0	1/0	1/0	1/0	1/0	1/0	1/0	1/0	1/0	1/0	1/0	1/0	1/0	1/0	1/0	1/0	1/0	1/0	1/1	1/0	1/0	1/0	1/1	1/0	1/0	1/0	1/0	1/0	1/0	1/0	1/0	1/0	1/0	1/0	1/0	1/0	1/0	1/0	1/0	1/0
NC_037340.1:10872371-10872645(+)	BosSINEL	50.19	49.81	531	527	2	527	0	7	1/0	1/0	1/0	1/0	1/0	1/0	1/0	1/0	1/0	1/0	1/0	1/0	1/0	1/0	1/0	1/0	1/0	1/0	1/0	1/0	1/0	1/0	1/0	1/0	1/0	1/0	1/0	1/0	1/0	1/0	1/0	1/0	1/0	1/0	1/0	1/0	1/0	1/0	1/0	1/0
NC_037340.1:10922706-10922976(-)	BosSINEL	49.34	50.66	523	537	0	523	7	6	1/0	1/0	1/0	1/0	1/0	1/0	1/0	1/0	1/0	1/0	1/0	1/0	1/0	1/0	1/0	1/0	1/0	1/0	1/0	1/0	1/0	1/0	1/0	1/0	1/0	1/0	1/0	1/0	1/0	1/0	1/0	1/0	1/0	1/0	1/0	1/0	1/0	1/0	1/0	1/0
NC_037340.1:10924732-10924999(+)	BosSINEL	59.26	40.74	621	427	101	419	4	12	1/0	1/0	1/0	1/0	1/1	1/0	1/0	1/0	1/0	1/0	1/0	1/0	1/0	1/0	1/1	1/0	1/1	1/0	1/0	1/1	1/0	1/0	1/0	1/0	1/1	1/0	1/0	1/0	1/0	1/0	1/0	1/0	1/0	1/0	1/1	1/0	1/0	1/0	1/0	1/0
NC_037340.1:11111438-11111714(-)	BosSINEL	10.76	89.24	113	937	0	113	412	11	0/0	0/0	0/0	1/0	0/0	0/0	0/0	0/0	1/0	0/0	1/0	0/0	1/0	0/0	0/0	NA	0/0	0/0	1/0	0/0	0/0	1/0	0/0	0/0	0/0	0/0	1/0	0/0	0/0	0/0	0/0	0/0	0/0	0/0	0/0	0/0	0/0	1/0	0/0	0/0
NC_037340.1:11169086-11169355(+)	BosSINEL	49.62	50.38	526	534	2	522	6	6	1/0	1/0	1/0	1/0	1/0	1/0	1/0	1/0	1/0	1/0	1/0	1/0	1/0	1/0	1/0	1/0	1/0	1/0	1/0	1/0	1/0	1/0	1/0	1/0	1/0	1/0	1/0	1/0	1/0	1/0	1/0	1/0	1/0	1/0	1/0	1/0	1/0	1/0	1/0	1/0
NC_037340.1:11202347-11202623(-)	BosSINEL	82.12	17.88	859	187	337	185	1	13	1/0	1/0	1/1	1/1	1/1	1/0	1/1	1/0	1/1	1/0	1/1	1/1	1/0	1/1	1/0	1/1	1/0	1/0	1/1	1/1	1/1	1/1	1/1	1/1	1/1	1/1	1/1	1/1	1/1	1/1	1/0	1/0	1/0	1/0	1/1	1/1	1/1	1/1	1/1	1/1
NC_037340.1:11221059-11221328(-)	BosSINEL	70.64	29.36	746	310	220	306	2	8	1/1	1/0	1/0	1/0	1/1	1/1	1/0	1/0	1/0	1/1	1/0	1/1	1/0	1/0	1/1	1/0	1/0	1/0	1/0	1/1	1/0	1/0	1/1	1/0	1/1	1/1	1/0	1/0	1/0	1/0	1/1	1/0	1/0	1/0	1/0	1/0	1/0	1/0	1/0	1/0
NC_037340.1:11286028-11286295(+)	BosSINEL	49.62	50.38	526	534	0	526	4	6	1/0	1/0	1/0	1/0	1/0	1/0	1/0	1/0	1/0	1/0	1/0	1/0	1/0	1/0	1/0	1/0	1/0	1/0	1/0	1/0	1/0	1/0	1/0	1/0	1/0	1/0	1/0	1/0	1/0	1/0	1/0	1/0	1/0	1/0	1/0	1/0	1/0	1/0	1/0	1/0
NC_037340.1:11359693-11359939(-)	BosSINEL	61.67	38.33	650	404	129	392	6	9	1/1	1/1	1/0	1/0	1/0	1/0	1/1	1/0	1/1	1/1	1/0	1/0	1/0	1/0	1/1	1/0	1/0	1/0	1/0	1/0	0/0	1/0	1/0	1/0	1/0	1/0	1/0	1/0	1/0	1/0	1/0	1/0	1/0	1/0	1/0	1/0	1/0	1/0	1/0	1/0
NC_037340.1:11395888-11396021(-)	BosSINEL	50.09	49.91	531	529	5	521	4	6	1/0	1/0	1/0	1/0	1/0	1/0	1/0	1/0	1/0	1/0	1/0	1/0	1/0	1/0	1/0	1/0	1/0	1/0	1/0	1/0	1/0	1/0	1/0	1/0	1/0	1/0	1/0	1/0	1/0	1/0	1/0	1/0	1/0	1/0	1/0	1/0	1/0	1/0	1/0	1/0
NC_037340.1:11430031-11430307(+)	BosSINEL	88.78	11.22	934	118	408	118	0	10	1/0	1/1	1/0	1/1	1/1	1/1	1/1	1/1	1/1	1/1	NA	1/1	1/1	1/1	1/1	1/1	1/1	1/1	1/1	1/1	1/1	1/1	1/1	1/1	1/1	1/1	1/1	1/1	1/1	1/1	1/1	1/1	1/1	1/1	1/1	1/1	1/1	1/1	1/1	1/1
NC_037340.1:11641400-11641535(+)	BosSINEL	48.03	51.97	513	555	0	513	21	2	1/0	1/0	1/0	1/0	1/0	1/0	1/0	1/0	1/0	1/0	1/0	1/0	1/0	1/0	1/0	1/0	1/0	1/0	1/0	1/0	1/0	1/0	1/0	1/0	1/0	1/0	1/0	1/0	1/0	1/0	1/0	1/0	1/0	1/0	1/0	1/0	1/0	1/0	1/0	1/0
NC_037340.1:13438193-13438460(+)	BosSINEL	49.72	50.28	529	535	1	527	4	4	1/0	1/0	1/0	1/0	1/0	1/0	1/0	1/0	1/0	1/0	1/0	1/0	1/0	1/0	1/0	1/0	1/0	1/0	1/0	1/0	1/0	1/0	1/0	1/0	1/0	1/0	1/0	1/0	1/0	1/0	1/0	1/0	1/0	1/0	1/0	1/0	1/0	1/0	1/0	1/0
NC_037340.1:13757096-13757370(+)	BosSINEL	55.86	44.14	591	467	66	459	4	7	1/0	1/0	1/0	1/0	1/0	1/0	1/0	1/0	1/0	1/0	1/0	1/0	1/0	1/0	1/0	1/0	1/0	1/0	1/0	1/0	1/0	1/0	1/0	1/0	1/0	1/0	1/0	1/0	1/0	1/0	1/0	1/0	1/0	1/0	1/0	1/0	1/0	1/0	1/0	1/0
NC_037340.1:13796984-13797258(-)	BosSINEL	49.81	50.19	527	531	7	513	9	7	1/0	1/0	1/0	1/0	1/0	1/0	1/0	1/0	1/0	1/0	1/0	1/0	1/0	1/0	1/0	1/0	1/0	1/0	1/0	1/0	1/0	1/0	1/0	1/0	1/0	1/0	1/0	1/0	1/0	1/0	1/0	1/0	1/0	1/0	1/0	1/0	1/0	1/0	1/0	1/0
NC_037340.1:13988308-13988575(-)	BosSINEL	63.04	36.96	667	391	148	371	10	7	1/1	1/1	1/0	1/0	1/0	1/1	1/0	1/0	1/0	1/1	1/0	1/0	1/1	1/0	1/0	1/1	1/0	1/0	1/0	1/0	1/0	1/0	1/0	1/0	1/0	1/0	1/0	1/0	1/0	1/0	1/0	1/0	1/0	1/0	1/0	1/0	1/0	1/0	1/0	1/0
NC_037340.1:14526816-14527089(-)	BosSINEL	51.23	48.77	542	516	14	514	1	7	1/0	1/0	1/0	1/0	1/0	1/0	1/0	1/0	1/0	1/0	1/0	1/0	1/0	1/0	1/0	1/0	1/0	1/0	1/0	1/0	1/0	1/0	1/0	1/0	1/0	1/0	1/0	1/0	1/0	1/0	1/0	1/0	1/0	1/0	1/0	1/0	1/0	1/0	1/0	1/0
NC_037340.1:14549208-14549483(-)	BosSINEL	67.24	32.76	706	344	183	340	2	11	1/1	1/0	1/0	1/0	1/0	1/0	1/0	1/0	1/1	1/0	1/0	1/0	1/0	1/0	1/0	1/0	1/0	1/0	1/0	1/0	1/0	1/0	1/0	1/0	1/0	1/0	1/0	1/1	1/0	1/0	1/0	1/0	1/0	1/1	1/0	1/0	1/1	1/0	1/0	1/0
NC_037340.1:15892624-15892689(+)	BosSINEL	50.57	49.43	534	522	7	520	1	8	1/0	1/0	1/0	1/0	1/0	1/0	1/0	1/0	1/0	1/0	1/0	1/0	1/0	1/0	1/0	1/0	1/0	1/0	1/0	1/0	1/0	1/0	1/0	1/0	1/0	1/0	1/0	1/0	1/0	1/0	1/0	1/0	1/0	1/0	1/0	1/0	1/0	1/0	1/0	1/0
NC_037340.1:16549206-16549478(-)	BosSINEL	70.97	29.03	748	306	224	300	3	9	1/0	1/0	1/0	1/0	1/1	1/0	1/1	1/0	1/0	1/0	1/1	1/1	1/1	1/0	1/1	1/1	1/0	1/1	1/1	1/1	1/1	1/1	1/1	1/1	1/1	1/1	1/1	1/1	1/1	1/0	1/1	1/1	1/1	1/1	1/1	1/1	1/1	1/1	1/1	1/1
NC_037340.1:16791228-16791503(-)	BosSINEL	48.69	51.31	522	550	0	522	14	0	1/0	1/0	1/0	1/0	1/0	1/0	1/0	1/0	1/0	1/0	1/0	1/0	1/0	1/0	1/0	1/0	1/0	1/0	1/0	1/0	1/0	1/0	1/0	1/0	1/0	1/0	1/0	1/0	1/0	1/0	1/0	1/0	1/0	1/0	1/0	1/0	1/0	1/0	1/0	1/0
NC_037340.1:17138764-17139030(+)	BosSINEL	48.22	51.78	514	552	0	514	19	3	1/0	1/0	1/0	1/0	1/0	1/0	1/0	1/0	1/0	1/0	1/0	1/0	1/0	1/0	1/0	1/0	1/0	1/0	1/0	1/0	1/0	1/0	1/0	1/0	1/0	1/0	1/0	1/0	1/0	1/0	1/0	1/0	1/0	1/0	1/0	1/0	1/0	1/0	1/0	1/0
NC_037340.1:17578977-17579243(-)	BosSINEL	50.09	49.91	531	529	3	525	2	6	1/0	1/0	1/0	1/0	1/0	1/0	1/0	1/0	1/0	1/0	1/0	1/0	1/0	1/0	1/0	1/0	1/0	1/0	1/0	1/0	1/0	1/0	1/0	1/0	1/0	1/0	1/0	1/0	1/0	1/0	1/0	1/0	1/0	1/0	1/0	1/0	1/0	1/0	1/0	1/0
NC_037340.1:18782358-18782485(-)	BosSINEL	86.41	13.59	909	143	384	141	1	10	1/0	1/1	1/1	1/1	1/1	1/0	1/1	1/1	1/1	1/1	1/1	1/1	1/1	1/1	1/1	1/1	1/1	1/1	1/1	1/0	1/0	1/1	1/1	1/1	1/1	1/1	1/1	1/1	1/1	1/1	1/1	1/0	1/1	1/1	1/1	1/1	1/1	1/1	1/1	1/1
NC_037340.1:19217167-19217442(-)	BosSINEL	54.25	45.75	574	484	50	474	5	7	1/0	1/0	1/0	1/0	1/0	1/0	1/1	1/0	1/0	1/0	1/1	1/0	1/0	1/0	1/0	1/0	1/0	1/0	1/0	1/0	1/0	1/0	1/0	1/0	1/0	1/0	1/1	1/0	1/0	1/0	1/0	1/0	1/0	1/0	1/0	1/0	1/0	1/0	1/0	1/0
NC_037340.1:19758952-19759227(-)	BosSINEL	76.37	23.63	808	250	280	248	1	7	1/1	1/1	1/1	1/1	1/1	1/1	1/0	1/1	1/1	1/1	1/1	1/1	1/0	1/0	1/1	1/0	1/0	1/0	1/0	1/1	1/0	1/1	1/0	1/1	1/1	1/1	1/1	1/0	1/0	1/1	1/0	1/1	1/0	1/0	1/1	1/1	1/1	1/1	1/0	1/0
NC_037340.1:20123698-20123969(-)	BosSINEL	69.38	30.62	734	324	210	314	5	7	1/1	1/1	1/1	1/1	1/0	1/0	1/0	1/0	1/0	1/0	1/1	1/0	1/0	1/0	1/0	1/0	1/0	1/0	1/0	1/0	1/0	1/1	1/0	1/0	1/0	1/0	1/1	1/0	1/0	1/0	1/0	1/0	1/0	1/0	1/0	1/0	1/0	1/0	1/0	1/0
NC_037340.1:20212548-20212818(+)	BosSINEL	48.97	51.03	524	546	0	524	11	1	1/0	1/0	1/0	1/0	1/0	1/0	1/0	1/0	1/0	1/0	1/0	1/0	1/0	1/0	1/0	1/0	1/0	1/0	1/0	1/0	1/0	1/0	1/0	1/0	1/0	1/0	1/0	1/0	1/0	1/0	1/0	1/0	1/0	1/0	1/0	1/0	1/0	1/0	1/0	1/0
NC_037340.1:21174348-21174472(-)	BosSINEL	61.52	38.48	641	401	130	381	10	15	1/0	1/0	1/0	1/0	1/0	1/0	1/0	1/0	1/0	1/0	1/0	1/0	1/0	1/0	1/0	1/0	1/0	1/0	1/0	1/0	1/1	1/0	1/0	1/0	1/0	1/0	1/0	1/0	1/0	1/1	1/0	1/0	1/0	1/0	1/0	1/0	1/0	1/0	1/0	1/0
NC_037340.1:21907387-21907658(-)	BosSINEL	88.28	11.72	934	124	406	122	1	7	1/1	1/1	1/1	1/0	1/1	1/0	1/0	1/1	1/1	1/1	1/1	1/1	1/1	1/0	1/1	1/1	1/1	1/1	1/1	1/1	1/1	1/0	1/0	1/1	1/1	1/1	1/1	1/1	1/1	1/1	1/1	1/1	1/0	1/1	1/0	1/1	1/1	1/1	1/1	1/1
NC_037340.1:23339780-23340050(+)	BosSINEL	85.36	14.64	898	154	375	148	3	10	1/1	1/1	1/1	1/0	1/1	1/1	1/1	1/1	1/1	1/1	1/1	1/1	1/1	1/0	1/1	1/0	1/0	1/1	1/1	1/0	1/0	1/1	1/1	1/0	1/1	1/1	1/0	1/1	1/0	1/1	1/1	1/0	1/1	1/1	1/1	1/1	1/0	1/0	1/1	1/0
NC_037340.1:23676834-23677120(+)	BosSINEL	49.07	50.93	526	546	0	526	10	0	1/0	1/0	1/0	1/0	1/0	1/0	1/0	1/0	1/0	1/0	1/0	1/0	1/0	1/0	1/0	1/0	1/0	1/0	1/0	1/0	1/0	1/0	1/0	1/0	1/0	1/0	1/0	1/0	1/0	1/0	1/0	1/0	1/0	1/0	1/0	1/0	1/0	1/0	1/0	1/0
NC_037340.1:24579080-24579352(-)	BosSINEL	49.15	50.85	522	540	0	522	9	5	1/0	1/0	1/0	1/0	1/0	1/0	1/0	1/0	1/0	1/0	1/0	1/0	1/0	1/0	1/0	1/0	1/0	1/0	1/0	1/0	1/0	1/0	1/0	1/0	1/0	1/0	1/0	1/0	1/0	1/0	1/0	1/0	1/0	1/0	1/0	1/0	1/0	1/0	1/0	1/0
NC_037340.1:25032683-25032924(+)	BosSINEL	50.85	49.15	538	520	13	512	4	7	1/0	1/0	1/0	1/0	1/0	1/0	1/0	1/0	1/0	1/0	1/0	1/0	1/0	1/0	1/0	1/0	1/0	1/0	1/0	1/0	1/0	1/0	1/0	1/0	1/0	1/0	1/0	1/0	1/0	1/0	1/0	1/0	1/0	1/0	1/0	1/0	1/1	1/0	1/0	1/0
NC_037340.1:25436558-25436833(+)	BosSINEL	53.4	46.6	566	494	41	484	5	6	1/0	1/0	1/0	1/0	1/0	1/0	1/0	1/0	1/0	1/0	1/0	1/0	1/0	1/0	1/0	1/0	1/0	1/0	1/0	1/0	1/0	1/0	1/0	1/0	1/0	1/0	1/0	1/0	1/0	1/0	1/0	1/0	1/0	1/0	1/0	1/0	1/0	1/0	1/0	1/0
NC_037340.1:25448329-25448604(-)	BosSINEL	58.48	41.52	614	436	99	416	10	11	1/1	1/0	1/0	1/0	1/0	1/0	1/1	1/0	1/0	1/0	1/0	1/1	1/0	1/0	1/0	1/0	1/0	1/0	1/0	1/0	1/0	1/0	1/0	1/0	1/0	1/0	1/1	1/0	1/1	1/0	1/0	1/0	1/1	1/0	1/1	1/0	1/0	1/0	1/0	1/0
NC_037340.1:25629965-25630230(-)	BosSINEL	53.76	46.24	572	492	47	478	7	4	1/0	1/0	1/0	1/0	1/0	1/0	1/0	1/0	1/0	1/0	1/0	1/0	1/0	1/0	1/0	1/0	1/0	1/0	1/0	1/0	1/0	1/0	1/0	1/1	1/0	1/0	1/0	1/0	1/0	1/0	1/0	1/0	1/1	1/0	1/0	1/0	1/0	1/1	1/0	1/0
NC_037340.1:26270130-26270402(-)	BosSINEL	57.29	42.71	605	451	81	443	4	8	1/0	1/0	1/0	1/0	1/0	1/0	1/0	1/0	1/0	1/0	1/1	1/0	1/0	1/0	1/0	1/0	1/1	1/0	1/0	1/0	1/0	1/0	1/0	1/0	1/0	1/1	1/0	1/0	1/0	1/0	1/0	1/0	1/0	1/0	1/0	1/0	1/0	1/1	1/0	1/1
NC_037340.1:26275160-26275435(+)	BosSINEL	51.87	48.13	554	514	26	502	6	2	1/0	1/0	1/0	1/0	1/0	1/0	1/0	1/0	1/0	1/0	1/0	1/0	1/1	1/0	1/0	1/0	1/0	1/0	1/0	1/0	1/0	1/0	1/0	1/0	1/0	1/0	1/0	1/0	1/0	1/0	1/0	1/0	1/0	1/0	1/0	1/0	1/0	1/0	1/0	1/0
NC_037340.1:27830377-27830545(+)	BosSINEL	50.09	49.91	531	529	4	523	3	6	1/0	1/0	1/0	1/0	1/0	1/0	1/0	1/0	1/0	1/0	1/0	1/0	1/0	1/0	1/0	1/0	1/0	1/0	1/0	1/0	1/0	1/0	1/0	1/0	1/0	1/0	1/0	1/0	1/0	1/0	1/0	1/0	1/0	1/0	1/0	1/0	1/0	1/0	1/0	1/0
NC_037340.1:27982015-27982147(-)	BosSINEL	52.08	47.92	552	508	29	494	7	6	1/0	1/0	1/0	1/0	1/0	1/0	1/0	1/0	1/0	1/0	1/0	1/0	1/0	1/0	1/0	1/0	1/0	1/0	1/0	1/0	1/0	1/0	1/0	1/0	1/0	1/0	1/0	1/0	1/0	1/0	1/0	1/0	1/0	1/0	1/0	1/0	1/0	1/0	1/0	1/0
NC_037340.1:28068298-28068470(+)	BosSINEL	48.78	51.22	520	546	0	520	13	3	1/0	1/0	1/0	1/0	1/0	1/0	1/0	1/0	1/0	1/0	1/0	1/0	1/0	1/0	1/0	1/0	1/0	1/0	1/0	1/0	1/0	1/0	1/0	1/0	1/0	1/0	1/0	1/0	1/0	1/0	1/0	1/0	1/0	1/0	1/0	1/0	1/0	1/0	1/0	1/0
NC_037340.1:28686096-28686372(-)	BosSINEL	52.09	47.91	549	505	31	487	9	9	1/0	1/0	1/0	1/0	0/0	1/0	1/0	1/0	1/0	1/0	1/0	1/0	1/0	1/0	1/1	1/0	1/0	1/0	1/0	1/0	1/0	1/0	1/0	1/0	1/0	1/0	1/0	1/0	1/0	1/0	1/0	1/0	1/0	1/0	1/0	1/0	1/0	1/0	1/0	1/0
NC_037340.1:29583903-29584174(+)	BosSINEL	48.88	51.12	524	548	0	524	12	0	1/0	1/0	1/0	1/0	1/0	1/0	1/0	1/0	1/0	1/0	1/0	1/0	1/0	1/0	1/0	1/0	1/0	1/0	1/0	1/0	1/0	1/0	1/0	1/0	1/0	1/0	1/0	1/0	1/0	1/0	1/0	1/0	1/0	1/0	1/0	1/0	1/0	1/0	1/0	1/0
NC_037340.1:31438979-31439396(-)	BosSINEL	73.05	26.95	767	283	242	283	0	11	1/1	1/0	1/0	1/1	1/1	1/0	1/1	1/1	1/0	1/0	1/0	1/1	1/0	1/0	1/0	1/1	1/1	1/1	1/0	1/0	1/1	1/1	1/1	1/0	1/1	1/1	1/1	1/1	1/1	1/1	1/0	1/1	1/1	1/0	1/0	1/1	1/1	1/1	1/0	1/1
NC_037340.1:31691484-31691747(+)	BosSINEL	51.22	48.78	544	518	27	490	14	5	1/0	1/0	1/0	1/0	1/0	1/1	1/0	1/0	1/1	1/0	1/0	1/0	1/0	1/0	1/0	1/0	1/1	1/0	1/0	1/0	1/0	1/0	1/0	1/0	1/0	1/0	1/0	1/0	1/0	1/0	1/0	1/0	1/0	1/0	1/0	1/0	1/0	1/0	1/0	1/0
NC_037340.1:31965217-31965491(+)	BosSINEL	53.22	46.78	562	494	35	492	1	8	1/0	1/0	1/0	1/0	1/0	1/0	1/0	1/0	1/0	1/0	1/0	1/0	1/0	1/0	1/0	1/0	1/0	1/0	1/0	1/1	1/0	1/0	1/0	1/0	1/0	1/0	1/0	1/0	1/0	1/0	1/0	1/0	1/0	1/0	1/0	1/0	1/0	1/0	1/0	1/0
NC_037340.1:32233622-32233898(+)	BosSINEL	68.37	31.63	722	334	200	322	6	8	1/1	1/1	1/1	1/1	1/0	1/0	1/0	1/0	1/0	1/0	1/0	1/0	1/0	1/0	1/0	1/0	1/0	1/0	1/0	1/0	1/0	1/0	1/0	1/0	1/0	1/0	1/0	1/0	1/0	1/0	1/0	1/0	1/0	1/0	1/0	1/0	1/0	1/0	1/0	1/0
NC_037340.1:33058777-33058899(-)	BosSINEL	68.15	31.85	721	337	194	333	2	7	1/1	1/0	1/0	1/0	1/1	1/1	1/1	1/1	1/1	1/1	1/0	1/1	1/0	1/1	1/1	1/1	1/0	1/1	1/1	1/0	1/0	1/1	1/0	1/1	1/0	1/1	1/0	1/1	1/0	1/1	1/0	1/0	1/1	1/1	1/1	1/1	1/0	1/1	1/0	1/0
NC_037340.1:33589766-33590035(-)	BosSINEL	49.34	50.66	522	536	2	518	9	7	1/0	1/0	1/0	1/0	1/0	1/0	1/0	1/0	1/0	1/0	1/0	1/0	1/0	1/0	1/0	1/0	1/0	1/0	1/0	1/0	1/0	1/0	1/0	1/0	1/0	1/0	1/0	1/0	1/0	1/0	1/0	1/0	1/0	1/0	1/0	1/0	1/0	1/0	1/0	1/0
NC_037340.1:33892435-33892684(+)	BosSINEL	51.13	48.87	542	518	20	502	8	6	1/0	1/0	1/0	1/0	1/0	1/0	1/0	1/0	1/0	1/0	1/0	1/0	1/0	1/0	1/0	1/0	1/0	1/0	1/0	1/0	1/0	1/0	1/0	1/0	1/0	1/0	1/0	1/0	1/0	1/0	1/0	1/0	1/0	1/0	1/0	1/0	1/0	1/0	1/0	1/0
NC_037340.1:35900260-35900379(+)	BosSINEL	48.88	51.12	522	546	0	522	12	2	1/0	1/0	1/0	1/0	1/0	1/0	1/0	1/0	1/0	1/0	1/0	1/0	1/0	1/0	1/0	1/0	1/0	1/0	1/0	1/0	1/0	1/0	1/0	1/0	1/0	1/0	1/0	1/0	1/0	1/0	1/0	1/0	1/0	1/0	1/0	1/0	1/0	1/0	1/0	1/0
NC_037340.1:36561437-36561702(-)	BosSINEL	61.24	38.76	643	407	120	403	2	11	1/0	1/0	1/0	1/0	1/1	1/0	1/1	1/0	1/1	1/0	1/0	1/0	1/0	1/0	1/1	1/0	1/0	1/0	1/1	1/0	1/1	1/0	1/1	1/1	1/0	1/0	1/1	1/0	1/0	1/1	1/0	1/1	1/0	1/1	1/0	1/0	1/0	1/1	1/0	1/0
NC_037340.1:37071746-37072020(-)	BosSINEL	49.43	50.57	524	536	3	518	9	6	1/0	1/0	1/0	1/0	1/0	1/0	1/0	1/0	1/0	1/0	1/0	1/0	1/0	1/0	1/0	1/0	0/0	1/0	1/0	1/0	1/0	1/0	1/0	1/0	1/0	1/0	1/0	1/0	1/0	1/0	1/0	1/0	1/0	1/0	1/0	1/0	1/0	1/0	1/0	1/0
NC_037340.1:37073380-37073655(-)	BosSINEL	49.53	50.47	524	534	5	514	10	7	1/0	1/0	1/0	1/0	1/0	1/0	1/0	1/0	1/0	1/0	1/0	1/0	1/0	1/0	1/0	1/0	1/0	1/0	1/0	1/0	1/0	1/0	1/0	1/0	1/0	1/0	1/0	1/0	1/0	1/0	1/0	1/0	1/0	1/0	1/0	1/0	1/0	1/0	1/0	1/0
NC_037340.1:37165637-37165769(-)	BosSINEL	50.19	49.81	532	528	9	514	7	6	1/0	1/0	1/0	1/0	1/0	1/0	1/0	1/0	1/0	1/0	1/0	1/0	1/0	1/0	1/0	1/0	1/0	1/0	1/0	1/0	1/0	1/0	1/0	1/0	1/0	1/0	1/0	1/0	1/0	1/0	1/0	1/0	1/0	1/0	1/0	1/0	1/0	1/0	1/0	1/0
NC_037340.1:37921392-37921665(+)	BosSINEL	51.13	48.87	541	517	13	515	1	7	1/0	1/0	1/0	1/0	1/0	1/0	1/0	1/0	1/0	1/0	1/0	1/0	1/0	1/0	1/0	1/0	1/0	1/0	1/0	1/0	1/0	1/0	1/0	1/0	1/0	1/0	1/0	1/0	1/0	1/0	1/0	1/0	1/0	1/0	1/0	1/0	1/0	1/0	1/0	1/0
NC_037340.1:38438935-38439210(-)	BosSINEL	49.34	50.66	527	541	3	521	10	2	1/0	1/0	1/0	1/0	1/0	1/0	1/0	1/0	1/0	1/0	1/0	1/0	1/0	1/0	1/0	1/0	1/0	1/0	1/0	1/0	1/0	1/0	1/0	1/0	1/0	1/0	1/0	1/0	1/0	1/0	1/0	1/0	1/0	1/0	1/0	1/0	1/0	1/0	1/0	1/0
NC_037340.1:38471021-38471293(-)	BosSINEL	50.66	49.34	534	520	15	504	8	9	1/0	1/0	1/0	1/0	1/0	1/0	1/0	1/0	1/0	1/0	1/0	1/0	1/0	1/0	1/0	1/0	1/0	1/0	1/0	1/0	1/0	1/0	1/0	1/0	1/0	1/0	1/0	1/0	1/0	1/0	1/0	1/0	1/0	1/0	1/0	1/0	1/0	1/0	1/0	1/0
NC_037340.1:38483463-38483735(-)	BosSINEL	48.69	51.31	522	550	0	522	14	0	1/0	1/0	1/0	1/0	1/0	1/0	1/0	1/0	1/0	1/0	1/0	1/0	1/0	1/0	1/0	1/0	1/0	1/0	1/0	1/0	1/0	1/0	1/0	1/0	1/0	1/0	1/0	1/0	1/0	1/0	1/0	1/0	1/0	1/0	1/0	1/0	1/0	1/0	1/0	1/0
NC_037340.1:38493948-38494224(+)	BosSINEL	85.93	14.07	904	148	380	144	2	10	1/1	1/1	1/1	1/1	1/1	1/1	1/0	1/1	1/1	1/0	1/0	1/0	1/1	1/0	1/1	1/0	1/0	1/1	1/0	1/1	1/1	1/1	1/1	1/0	1/1	1/1	1/1	1/1	1/1	1/1	1/1	1/1	1/1	1/0	1/0	1/0	1/0	1/0	1/0	1/1
NC_037340.1:38597320-38597595(+)	BosSINEL	55.87	44.13	590	466	74	442	12	8	1/0	1/0	1/0	1/0	1/0	1/0	1/0	1/0	1/0	1/0	1/0	1/1	1/0	1/0	1/0	1/0	1/0	1/0	1/0	1/0	1/0	1/0	1/0	1/1	1/0	1/0	1/1	1/0	1/0	1/0	1/1	1/1	1/0	1/0	1/1	1/0	1/0	1/0	1/0	1/0
NC_037340.1:39188361-39188641(+)	BosSINEL	85.02	14.98	891	157	370	151	3	12	1/1	1/1	1/1	1/1	1/0	1/1	1/1	1/1	1/0	1/1	1/0	1/0	1/1	1/0	1/1	1/0	1/1	1/0	1/0	1/0	1/0	1/1	1/0	1/1	1/0	1/1	1/0	1/1	1/1	1/0	1/0	1/0	1/1	1/1	1/0	1/1	1/0	1/1	1/1	1/0
NC_037340.1:40186738-40186786(-)	BosSINEL	89.2	10.8	892	108	397	98	5	36	1/0	1/0	1/1	1/0	1/1	1/1	1/1	1/1	1/1	1/0	1/1	1/0	1/1	1/1	NA	1/0	1/1	1/1	1/1	1/1	1/1	1/1	1/1	NA	1/1	1/1	1/1	1/1	1/0	1/1	NA	1/1	1/1	1/1	1/0	1/1	1/1	1/1	1/1	1/1
NC_037340.1:41627079-41627353(-)	BosSINEL	51.9	48.1	546	506	33	480	13	10	1/0	1/0	1/0	1/0	1/0	1/0	1/0	1/0	1/0	1/0	1/0	1/0	1/0	1/1	1/0	1/0	1/0	1/0	1/0	1/0	1/0	1/0	1/0	1/0	1/0	1/0	1/0	1/0	1/0	1/0	1/0	1/0	1/0	1/0	1/0	1/0	1/0	1/0	1/0	1/0
NC_037340.1:41862322-41862410(-)	BosSINEL	49.44	50.56	528	540	5	518	11	2	1/0	1/0	1/0	1/0	1/0	1/0	1/0	1/0	1/0	1/0	1/0	1/0	1/0	1/0	1/0	1/0	1/0	1/0	1/0	1/0	1/0	1/0	1/0	1/0	1/0	1/0	1/0	1/0	1/0	1/0	1/0	1/0	1/0	1/0	1/0	1/0	1/0	1/0	1/0	1/0
NC_037340.1:43426166-43426300(+)	BosSINEL	50.85	49.15	539	521	13	513	4	6	1/0	1/0	1/0	1/0	1/0	1/0	1/0	1/0	1/0	1/0	1/0	1/0	1/0	1/0	1/0	1/0	1/0	1/0	1/0	1/0	1/0	1/0	1/0	1/0	1/0	1/0	1/0	1/0	1/0	1/0	1/0	1/0	1/0	1/0	1/0	1/0	1/0	1/0	1/0	1/0
NC_037340.1:43830859-43831134(-)	BosSINEL	48.97	51.03	523	545	0	523	11	2	1/0	1/0	1/0	1/0	1/0	1/0	1/0	1/0	1/0	1/0	1/0	1/0	1/0	1/0	1/0	1/0	1/0	1/0	1/0	1/0	1/0	1/0	1/0	1/0	1/0	1/0	1/0	1/0	1/0	1/0	1/0	1/0	1/0	1/0	1/0	1/0	1/0	1/0	1/0	1/0
NC_037340.1:43837572-43837608(+)	BosSINEL	50.28	49.72	533	527	10	513	7	6	1/0	1/0	1/0	1/0	1/0	1/0	1/0	1/0	1/0	1/0	1/0	1/0	1/0	1/0	1/0	1/0	1/0	1/0	1/0	1/0	1/0	1/0	1/0	1/0	1/0	1/0	1/0	1/0	1/0	1/0	1/0	1/0	1/0	1/0	1/0	1/0	1/0	1/0	1/0	1/0
NC_037340.1:43947438-43947713(+)	BosSINEL	82.58	17.42	872	184	345	182	1	8	1/1	1/0	1/0	1/1	1/1	1/0	1/1	1/0	1/1	1/1	1/1	1/0	1/0	1/1	1/1	1/0	1/1	1/1	1/1	1/0	1/1	1/0	1/0	1/1	1/1	1/1	1/1	1/1	1/1	1/0	1/1	1/0	1/1	1/0	1/0	1/1	1/0	1/1	1/1	1/1
NC_037340.1:44512237-44512513(+)	BosSINEL	65.66	34.34	696	364	168	360	2	6	1/0	1/1	1/0	1/0	1/0	1/0	1/0	1/0	1/0	1/0	1/0	1/0	1/0	1/0	1/0	1/0	1/0	1/0	1/0	1/0	1/1	1/0	1/0	1/0	1/0	1/0	1/0	1/0	1/0	1/0	1/1	1/1	1/0	1/0	1/0	1/0	1/0	1/0	1/0	1/0
NC_037340.1:45286710-45286984(+)	BosSINEL	43.5	56.5	462	600	4	454	73	5	1/0	0/0	1/0	1/0	1/0	1/0	1/0	1/0	1/0	1/0	1/0	0/0	1/0	1/0	1/0	1/0	1/0	1/0	1/0	1/0	1/0	1/0	0/0	1/0	1/0	1/0	1/0	1/0	1/0	0/0	1/0	1/0	1/0	1/0	0/0	1/0	1/0	1/0	0/0	1/0
NC_037340.1:46207483-46207754(+)	BosSINEL	62.97	37.03	665	391	146	373	9	8	1/0	1/0	1/0	1/0	1/0	1/0	1/0	1/0	1/0	1/0	1/0	1/0	1/1	1/0	1/0	1/1	1/1	1/1	1/0	1/1	1/1	1/0	1/0	1/0	1/1	1/1	1/0	1/0	1/0	1/0	1/0	1/1	1/0	1/0	1/0	1/0	1/0	1/1	1/0	1/0
NC_037340.1:46883735-46884005(-)	BosSINEL	49.34	50.66	527	541	0	527	7	2	1/0	1/0	1/0	1/0	1/0	1/0	1/0	1/0	1/0	1/0	1/0	1/0	1/0	1/0	1/0	1/0	1/0	1/0	1/0	1/0	1/0	1/0	1/0	1/0	1/0	1/0	1/0	1/0	1/0	1/0	1/0	1/0	1/0	1/0	1/0	1/0	1/0	1/0	1/0	1/0
NC_037340.1:47659448-47659559(+)	BosSINEL	83.56	16.44	879	173	356	167	3	10	1/1	1/1	1/1	1/1	1/0	1/0	1/0	1/1	1/0	1/0	1/1	1/0	1/1	1/1	1/0	1/1	1/0	1/0	1/1	1/1	1/0	1/0	1/1	1/1	1/0	1/1	1/0	1/0	1/1	1/0	1/0	1/1	1/0	1/0	1/1	1/0	1/0	1/0	1/0	1/0
NC_037340.1:47789920-47790195(-)	BosSINEL	49.72	50.28	531	537	4	523	7	2	1/0	1/0	1/0	1/0	1/0	1/0	1/0	1/0	1/0	1/0	1/0	1/0	1/0	1/0	1/0	1/0	1/0	1/0	1/0	1/0	1/0	1/0	1/0	1/0	1/0	1/0	1/0	1/0	1/0	1/0	1/0	1/0	1/0	1/0	1/0	1/0	1/0	1/0	1/0	1/0
NC_037340.1:48336903-48337173(-)	BosSINEL	51.7	48.3	547	511	34	479	16	7	1/0	1/0	1/0	1/0	1/0	1/0	1/0	1/0	1/0	1/0	1/0	1/0	1/0	1/0	1/0	1/0	1/0	1/0	1/0	1/0	1/0	1/0	1/0	1/0	1/0	1/0	1/0	1/0	1/0	1/0	1/0	1/0	1/0	1/0	1/0	1/0	1/0	1/0	1/0	1/0
NC_037340.1:48935808-48936084(+)	BosSINEL	50.47	49.53	534	524	10	514	5	7	1/0	1/0	1/0	1/0	1/0	1/0	1/0	1/0	1/0	1/0	1/0	1/0	1/1	1/0	1/0	1/0	1/0	1/0	1/0	1/0	1/0	1/0	1/0	1/0	1/0	1/0	1/0	1/0	1/0	1/0	1/0	1/0	1/0	1/0	1/0	1/0	1/0	1/0	1/0	1/0
NC_037340.1:49786315-49786568(+)	BosSINEL	50.19	49.81	530	526	5	520	3	8	1/0	1/0	1/0	1/0	1/0	1/0	1/0	1/0	1/0	1/0	1/0	1/0	1/0	1/0	1/0	1/0	1/0	1/0	1/0	1/0	1/0	1/0	1/0	1/0	1/0	1/0	1/0	1/0	1/0	1/0	1/0	1/0	1/0	1/0	1/0	1/0	1/0	1/0	1/0	1/0
NC_037340.1:49851879-49852141(-)	BosSINEL	82.82	17.18	868	180	346	176	2	12	1/1	1/0	1/1	1/1	1/1	1/0	1/1	1/1	1/1	1/0	1/1	1/0	1/1	1/0	1/0	1/0	1/0	1/1	1/0	1/1	1/0	1/0	1/0	1/0	1/1	1/0	1/1	1/0	1/0	1/1	1/0	1/1	1/0	1/1	1/0	1/1	1/1	1/1	1/1	1/1
NC_037340.1:49927338-49927611(-)	BosSINEL	50.09	49.91	535	533	14	507	13	2	1/0	1/0	1/0	1/0	1/0	1/0	1/0	1/0	1/0	1/0	1/0	1/0	1/0	1/0	1/0	1/0	1/0	1/0	1/0	1/0	1/0	1/0	1/0	1/0	1/0	1/0	1/0	1/0	1/0	1/0	1/0	1/0	1/0	1/0	1/0	1/0	1/0	1/0	1/0	1/0
NC_037340.1:50012049-50012183(-)	BosSINEL	52.36	47.64	555	505	26	503	1	6	1/0	1/0	1/0	1/0	1/0	1/0	1/0	1/0	1/0	1/1	1/0	1/0	1/0	1/0	1/0	1/0	1/0	1/1	1/0	1/0	1/0	1/0	1/0	1/0	1/0	1/0	1/0	1/0	1/0	1/0	1/0	1/0	1/0	1/0	1/0	1/0	1/0	1/0	1/0	1/0
NC_037340.1:50576186-50576460(-)	BosSINEL	89.98	10.02	943	105	419	105	0	12	1/1	1/1	1/0	1/1	1/1	1/1	1/0	1/1	1/1	1/1	1/1	1/1	1/1	1/1	1/1	1/1	1/1	1/1	1/1	1/1	1/1	1/0	1/1	1/1	1/1	1/1	1/1	1/1	1/1	1/1	1/1	1/1	1/1	1/1	1/0	1/0	1/0	1/1	1/0	1/1
NC_037340.1:50857021-50857294(-)	BosSINEL	55.91	44.09	596	470	76	444	13	3	1/0	1/1	1/0	1/1	1/0	1/0	1/0	1/0	1/0	1/0	1/0	1/0	1/0	1/0	1/0	1/0	1/0	1/0	1/0	1/0	1/0	1/0	1/0	1/0	1/0	1/0	1/0	1/0	1/0	1/0	1/0	1/0	1/0	1/0	1/0	1/0	1/0	1/0	1/0	1/0
NC_037340.1:51151189-51151429(+)	BosSINEL	50	50	530	530	2	526	2	6	1/0	1/0	1/0	1/0	1/0	1/0	1/0	1/0	0/0	1/0	1/0	1/0	1/0	1/0	1/0	1/0	1/0	1/0	1/0	1/0	1/0	1/0	1/0	1/0	1/0	1/0	1/0	1/0	1/0	1/0	1/0	1/0	1/0	1/0	1/0	1/0	1/0	1/0	1/0	1/0
NC_037340.1:51536477-51536706(-)	BosSINEL	82.15	17.85	856	186	338	180	3	15	1/1	1/0	1/1	1/0	1/1	1/1	1/0	1/1	1/0	1/0	1/0	1/0	1/1	1/0	1/0	1/0	1/1	1/0	1/0	1/1	1/0	1/0	1/1	1/0	1/1	1/1	1/0	1/0	1/1	1/0	1/0	1/1	1/1	1/0	1/1	1/1	1/0	1/0	1/1	1/0
NC_037340.1:51760956-51761232(+)	BosSINEL	54.06	45.94	572	486	49	474	6	7	1/0	1/0	1/0	1/0	1/0	1/0	1/0	1/0	1/0	1/0	1/0	1/0	1/0	1/1	1/0	1/0	1/0	1/0	1/0	1/0	1/0	1/0	1/0	1/0	1/0	1/0	1/1	1/0	1/0	1/0	1/0	1/0	1/0	1/0	1/0	1/0	1/0	1/1	1/0	1/0
NC_037340.1:52022131-52022407(-)	BosSINEL	69.13	30.87	730	326	210	310	8	8	1/1	1/0	1/1	1/0	1/1	1/0	1/0	1/1	1/0	1/0	1/0	1/1	1/0	1/1	1/0	1/0	1/0	1/0	1/1	1/0	1/0	1/1	1/0	1/1	1/0	1/0	1/0	1/1	1/0	1/0	1/0	1/0	1/0	1/1	1/0	1/0	1/0	1/1	1/0	1/0
NC_037340.1:52210386-52210517(+)	BosSINEL	51.5	48.5	548	516	20	508	4	4	1/0	1/0	1/0	1/0	1/0	1/0	1/0	1/0	1/0	1/0	1/0	1/0	1/0	1/0	1/0	1/0	1/0	1/0	1/0	1/0	1/0	1/0	1/0	1/0	1/0	1/0	1/0	1/0	1/0	1/0	1/0	1/0	1/0	1/0	1/0	1/0	1/0	1/0	1/0	1/0
NC_037340.1:52767547-52767820(-)	BosSINEL	60.19	39.81	632	418	209	214	102	11	1/1	1/1	1/1	1/1	1/0	0/0	1/0	1/0	1/0	1/1	1/0	1/0	1/1	1/0	1/1	1/1	0/0	1/0	1/0	1/0	1/1	1/1	1/0	1/0	1/0	1/0	1/1	1/0	1/0	1/1	1/1	1/0	1/1	1/0	1/0	0/0	1/0	1/1	1/0	1/0
NC_037340.1:52811879-52812154(+)	BosSINEL	77.43	22.57	813	237	293	227	5	11	1/1	1/0	1/1	1/0	1/1	1/1	1/0	1/0	1/1	1/0	1/0	1/0	1/1	1/1	1/0	1/0	1/1	1/1	1/0	1/0	1/0	1/0	1/1	1/0	1/0	1/1	1/0	1/1	1/1	1/0	1/0	1/0	1/0	1/0	1/0	1/0	1/0	1/0	1/1	1/1
NC_037340.1:52828462-52828731(+)	BosSINEL	75.33	24.67	788	258	267	254	2	13	1/0	1/1	1/0	1/1	1/0	1/0	1/0	1/1	1/1	1/1	1/0	1/0	1/0	1/0	1/0	1/0	1/1	1/0	1/1	1/0	1/0	1/0	1/0	1/0	1/1	1/1	1/1	1/0	1/0	1/1	1/0	1/0	1/0	1/1	1/1	1/1	1/1	1/0	1/0	1/1
NC_037340.1:53628436-53628701(+)	BosSINEL	74.86	25.14	792	266	266	260	3	7	1/1	1/0	1/0	1/0	1/0	1/0	1/0	1/0	1/1	1/1	1/0	1/0	1/0	1/0	1/0	1/0	1/0	1/1	1/0	1/0	1/0	1/0	1/0	1/1	1/0	1/1	1/1	1/0	1/0	1/0	1/1	1/0	1/0	1/1	1/1	1/1	1/0	1/0	1/0	1/1
NC_037340.1:55485697-55485734(+)	BosSINEL	59.17	40.83	626	432	103	420	6	7	1/0	1/1	1/0	1/0	1/1	1/0	1/0	1/0	1/0	1/0	1/0	1/0	1/0	1/0	1/0	1/0	1/0	1/0	1/0	1/0	1/0	1/0	1/0	1/0	1/0	1/1	1/0	1/0	1/0	1/0	1/0	1/0	1/0	1/0	1/0	1/0	1/0	1/0	1/0	1/0
NC_037340.1:58016766-58016899(+)	BosSINEL	62.64	37.36	664	396	136	392	2	6	1/0	1/0	1/0	1/0	1/0	1/0	1/0	1/0	1/0	1/0	1/0	1/1	1/0	1/0	1/1	1/1	1/1	1/0	1/1	1/0	1/0	1/0	1/0	1/0	1/0	1/0	1/0	1/0	1/0	1/0	1/0	1/0	1/0	1/0	1/1	1/1	1/0	1/0	1/0	1/0
NC_037340.1:58230747-58230933(+)	BosSINEL	74.95	25.05	748	250	251	246	2	37	1/1	1/0	1/0	1/1	1/0	1/0	1/1	1/0	1/0	1/0	1/1	1/1	1/0	1/0	1/1	1/0	1/1	1/0	1/1	1/0	1/1	1/0	1/0	1/0	1/0	1/1	1/1	1/0	1/1	1/1	1/0	1/1	1/0	1/1	1/0	1/0	1/1	1/1	1/1	1/0
NC_037340.1:58619771-58620046(+)	BosSINEL	70.06	29.94	737	315	212	313	1	10	1/1	1/0	1/1	1/0	1/0	1/0	1/1	1/0	1/1	1/0	1/0	1/0	1/1	1/0	1/0	1/0	1/1	1/1	1/1	1/0	1/0	1/0	1/0	1/0	1/0	1/0	1/0	1/1	1/1	1/0	1/0	1/0	1/0	1/1	1/1	1/1	1/0	1/1	1/1	1/0
NC_037340.1:59013062-59013129(+)	BosSINEL	48.79	51.21	522	548	0	522	13	1	1/0	1/0	1/0	1/0	1/0	1/0	1/0	1/0	1/0	1/0	1/0	1/0	1/0	1/0	1/0	1/0	1/0	1/0	1/0	1/0	1/0	1/0	1/0	1/0	1/0	1/0	1/0	1/0	1/0	1/0	1/0	1/0	1/0	1/0	1/0	1/0	1/0	1/0	1/0	1/0
NC_037340.1:59875150-59875420(-)	BosSINEL	52.06	47.94	556	512	32	492	10	2	1/0	1/0	1/0	1/0	1/0	1/0	1/0	1/0	1/0	1/0	1/1	1/0	1/0	1/0	1/0	1/0	1/0	1/0	1/0	1/0	1/0	1/0	1/0	1/0	0/0	1/0	1/0	1/0	1/0	1/0	1/0	1/0	1/0	1/0	1/0	1/0	1/0	1/0	1/0	1/0
NC_037340.1:59886933-59887056(+)	BosSINEL	56.58	43.42	593	455	71	451	2	12	1/0	1/0	1/0	1/0	1/0	1/0	1/0	1/0	1/0	1/0	1/0	1/0	1/0	1/0	1/0	1/0	1/0	1/0	1/0	1/0	1/0	1/0	1/0	1/0	1/0	1/0	1/0	1/0	1/0	1/0	1/0	1/0	1/0	1/0	1/0	1/0	1/0	1/0	1/0	1/0
NC_037340.1:60667996-60668129(+)	BosSINEL	48.69	51.31	522	550	0	522	14	0	1/0	1/0	1/0	1/0	1/0	1/0	1/0	1/0	1/0	1/0	1/0	1/0	1/0	1/0	1/0	1/0	1/0	1/0	1/0	1/0	1/0	1/0	1/0	1/0	1/0	1/0	1/0	1/0	1/0	1/0	1/0	1/0	1/0	1/0	1/0	1/0	1/0	1/0	1/0	1/0
NC_037340.1:62468710-62468947(+)	BosSINEL	48.6	51.4	521	551	2	517	17	0	1/0	1/0	1/0	1/0	1/0	1/0	1/0	1/0	1/0	1/0	1/0	1/0	1/0	1/0	1/0	1/0	1/0	1/0	1/0	1/0	1/0	1/0	1/0	1/0	1/0	1/0	1/0	1/0	1/0	1/0	1/0	1/0	1/0	1/0	1/0	1/0	1/0	1/0	1/0	1/0
NC_037340.1:63410302-63410575(-)	BosSINEL	74.95	25.05	787	263	267	253	5	11	1/1	1/0	1/1	1/0	1/1	1/1	1/0	1/1	1/0	1/1	1/0	1/0	1/0	1/0	1/0	1/0	1/0	1/1	1/1	1/1	1/1	1/1	1/0	1/0	1/0	1/1	1/0	1/0	1/1	1/1	1/0	1/1	1/1	1/1	1/0	1/0	1/0	1/0	1/1	1/1
NC_037340.1:63668568-63668636(-)	BosSINEL	53.52	46.48	563	489	39	485	2	10	1/0	1/0	1/0	1/0	1/0	1/0	1/0	1/0	1/0	1/0	1/0	1/0	1/0	1/0	1/0	1/0	1/0	1/0	1/0	1/0	1/0	1/0	1/1	1/0	1/0	1/0	1/0	1/0	1/0	1/0	1/0	1/0	1/0	1/0	1/0	1/0	1/0	1/0	1/0	1/0
NC_037340.1:63670829-63670964(-)	BosSINEL	48.88	51.12	523	547	0	523	12	1	1/0	1/0	1/0	1/0	1/0	1/0	1/0	1/0	1/0	1/0	1/0	1/0	1/0	1/0	1/0	1/0	1/0	1/0	1/0	1/0	1/0	1/0	1/0	1/0	1/0	1/0	1/0	1/0	1/0	1/0	1/0	1/0	1/0	1/0	1/0	1/0	1/0	1/0	1/0	1/0
NC_037340.1:63747996-63748119(+)	BosSINEL	84.04	15.96	874	166	356	162	2	16	1/1	1/1	1/1	1/1	1/0	1/1	1/1	1/0	1/0	1/0	1/0	1/1	1/1	1/0	1/0	1/1	1/0	1/0	1/0	1/1	1/0	1/0	1/1	1/1	1/0	1/1	1/0	1/0	1/0	1/1	1/0	1/0	1/0	1/1	1/0	1/1	1/1	1/0	1/0	1/1
NC_037340.1:64467437-64467710(+)	BosSINEL	70.36	29.64	743	313	217	309	2	8	1/0	1/0	1/0	1/0	1/0	1/1	1/1	1/0	1/0	1/0	1/0	1/0	1/0	1/0	1/0	1/0	1/0	1/0	1/0	1/1	1/0	1/0	1/0	1/1	1/1	1/1	1/0	1/0	1/0	1/0	1/1	1/0	1/0	1/1	1/0	1/0	1/1	1/0	1/0	1/1
NC_037340.1:66024367-66024445(-)	BosSINEL	80.38	19.62	844	206	320	204	1	11	1/0	1/1	1/1	1/1	1/0	1/1	1/0	1/0	1/0	1/0	1/1	1/0	1/0	1/1	1/0	1/0	1/1	1/1	1/0	1/1	1/0	1/1	1/1	1/0	1/1	1/0	1/0	1/0	1/1	1/0	1/1	1/1	1/0	1/0	1/0	1/0	1/0	1/0	1/1	1/0
NC_037340.1:66418433-66418557(+)	BosSINEL	85.82	14.18	908	150	379	150	0	7	1/1	1/1	1/1	1/1	1/1	1/0	1/1	1/1	1/1	1/1	1/1	1/1	1/1	1/1	1/1	1/1	1/0	1/0	1/0	1/1	1/1	1/0	1/1	1/1	1/0	1/0	1/0	1/1	1/0	1/1	1/1	1/0	1/1	1/0	1/1	1/1	1/1	1/0	1/0	1/0
NC_037340.1:67508384-67508797(+)	BosSINEL	84.36	15.64	879	163	361	157	3	15	1/1	1/1	1/1	1/1	1/0	1/1	1/1	1/1	1/1	1/1	1/1	1/0	1/0	1/1	1/1	1/0	1/1	1/0	1/0	1/1	1/0	1/0	1/0	1/0	1/0	1/0	1/0	1/0	1/0	1/1	1/0	1/0	1/0	1/0	1/1	1/1	1/0	1/0	1/1	1/1
NC_037340.1:67928036-67928309(+)	BosSINEL	49.91	50.09	529	531	5	519	6	6	1/0	1/0	1/0	1/0	1/0	1/0	1/0	1/0	1/0	1/0	1/0	1/0	1/0	1/0	1/0	1/0	1/0	1/0	1/0	1/0	1/0	1/0	1/0	1/0	1/0	1/0	1/0	1/0	1/0	1/0	1/0	1/0	1/0	1/0	1/0	1/0	1/0	1/0	1/0	1/0
NC_037340.1:68421428-68421697(-)	BosSINEL	59.3	40.7	625	429	105	415	7	9	1/0	1/0	1/0	1/0	1/0	1/1	1/1	1/1	1/0	1/0	1/0	1/0	1/0	1/1	1/0	1/0	1/0	1/1	1/1	1/1	1/1	1/0	1/1	1/0	1/1	1/0	1/0	1/0	1/0	1/1	1/0	1/0	1/0	1/0	1/0	0/0	1/0	1/1	1/0	1/0
NC_037340.1:68669812-68670086(-)	BosSINEL	48.04	51.96	515	557	0	515	21	0	1/0	1/0	1/0	1/0	1/0	1/0	1/0	1/0	1/0	1/0	1/0	1/0	1/0	1/0	1/0	1/0	1/0	1/0	1/0	1/0	1/0	1/0	1/0	1/0	1/0	1/0	1/0	1/0	1/0	1/0	1/0	1/0	1/0	1/0	1/0	1/0	1/0	1/0	1/0	1/0
NC_037340.1:68779737-68780013(-)	BosSINEL	71.51	28.49	758	302	231	296	3	6	1/1	1/1	1/1	1/1	1/1	1/1	1/0	1/1	1/0	1/1	1/1	1/1	1/0	1/1	1/1	1/1	1/1	1/0	1/1	1/1	1/0	1/0	1/0	1/1	1/1	1/1	1/1	1/1	1/0	1/1	1/0	1/1	1/0	1/0	1/1	1/0	1/0	1/1	1/0	1/0
NC_037340.1:72094253-72094419(-)	BosSINEL	63.05	36.95	662	388	147	368	10	11	1/0	1/0	1/0	1/0	1/0	1/0	1/1	1/1	1/0	1/1	1/0	1/0	1/0	1/0	1/1	1/0	1/0	1/0	1/0	1/1	1/0	1/0	1/0	1/0	1/0	1/1	1/0	1/0	1/1	1/0	1/0	1/1	1/0	1/0	1/1	1/1	1/0	1/0	1/0	1/1
NC_037340.1:72783358-72783634(+)	BosSINEL	54.65	45.35	576	478	58	460	9	9	1/1	1/0	1/0	1/0	1/0	1/0	1/0	1/0	1/0	1/0	1/0	1/0	1/0	1/0	1/0	1/0	1/0	1/0	1/0	1/0	1/0	1/0	1/0	1/0	1/0	1/0	1/0	1/0	1/0	1/0	1/0	1/0	1/0	1/0	1/0	1/0	1/0	1/0	1/0	1/0
NC_037340.1:72941626-72941896(-)	BosSINEL	52.55	47.45	557	503	39	479	12	6	1/0	1/0	1/0	1/0	1/1	0/0	1/0	1/0	1/0	1/0	1/0	1/0	1/0	1/0	1/0	1/0	1/0	1/0	1/0	1/0	1/0	1/0	1/0	1/0	1/0	1/0	1/0	1/0	1/0	1/0	1/0	1/0	1/0	1/0	1/0	1/1	1/0	1/0	1/0	1/0
NC_037340.1:73555806-73556074(+)	BosSINEL	50.19	49.81	532	528	4	524	2	6	1/0	1/0	1/0	1/0	1/0	1/0	1/0	1/0	1/0	1/0	1/0	1/0	1/0	1/0	1/0	1/0	1/0	1/0	1/0	1/0	1/0	1/0	1/0	1/0	1/0	1/0	1/0	1/0	1/0	1/0	1/0	1/0	1/0	1/0	1/0	1/0	1/0	1/0	1/0	1/0
NC_037340.1:73846377-73846653(-)	BosSINEL	48.68	51.32	518	546	0	518	14	4	1/0	1/0	1/0	1/0	1/0	1/0	1/0	1/0	1/0	1/0	1/0	1/0	1/0	1/0	1/0	1/0	1/0	1/0	1/0	1/0	1/0	1/0	1/0	1/0	1/0	1/0	1/0	1/0	1/0	1/0	1/0	1/0	1/0	1/0	1/0	1/0	1/0	1/0	1/0	1/0
NC_037340.1:73968068-73968183(+)	BosSINEL	50	50	529	529	5	519	5	7	1/0	1/0	1/0	1/0	1/0	1/0	1/0	1/0	1/0	1/0	1/0	1/0	1/0	1/0	1/0	1/0	1/0	1/0	1/0	1/0	1/0	1/0	1/0	0/0	1/0	1/0	1/0	1/0	1/0	1/0	1/0	1/0	1/0	1/0	1/0	1/0	1/0	1/0	1/0	1/0
NC_037340.1:73995715-73995836(-)	BosSINEL	49.43	50.57	524	536	3	518	9	6	1/0	1/0	1/0	1/0	1/0	1/0	1/0	1/0	1/0	1/0	1/0	1/0	1/0	1/0	1/0	1/0	1/0	1/0	1/0	1/0	1/0	1/0	1/0	1/0	1/0	1/0	1/0	1/0	1/0	1/0	1/0	1/0	1/0	1/0	1/0	1/0	1/0	1/0	1/0	1/0
NC_037340.1:74252981-74253256(-)	BosSINEL	58.79	41.21	622	436	110	402	17	7	1/0	1/0	1/0	1/0	1/1	1/1	1/0	1/0	1/0	1/0	1/1	1/1	1/0	1/0	1/1	1/0	1/0	1/0	1/0	1/0	1/0	1/0	1/0	1/0	1/0	1/1	1/0	1/1	1/0	1/0	1/0	1/0	1/0	1/0	1/0	1/0	1/1	1/0	1/0	1/1
NC_037340.1:74285419-74285689(-)	BosSINEL	48.97	51.03	523	545	0	523	11	2	1/0	1/0	1/0	1/0	1/0	1/0	1/0	1/0	1/0	1/0	1/0	1/0	1/0	1/0	1/0	1/0	1/0	1/0	1/0	1/0	1/0	1/0	1/0	1/0	1/0	1/0	1/0	1/0	1/0	1/0	1/0	1/0	1/0	1/0	1/0	1/0	1/0	1/0	1/0	1/0
NC_037340.1:74631395-74631666(-)	BosSINEL	49.72	50.28	527	533	5	517	8	6	1/0	1/0	1/0	1/0	1/0	1/0	1/0	1/0	1/0	1/0	1/0	1/0	1/0	1/0	1/0	1/0	1/0	1/0	1/0	1/0	1/0	1/0	1/0	1/0	1/0	1/0	1/0	1/0	1/0	1/0	1/0	1/0	1/0	1/0	1/0	1/0	1/0	1/0	1/0	1/0
NC_037340.1:74667907-74668178(-)	BosSINEL	89.66	10.34	945	109	421	103	3	9	1/1	1/1	1/1	1/1	1/1	1/1	1/1	1/0	1/1	1/0	1/1	1/1	1/0	1/1	1/1	1/1	1/1	1/1	1/1	1/1	1/1	1/1	1/0	1/1	1/0	1/0	1/0	1/0	1/1	1/1	1/0	1/1	1/1	1/1	1/0	1/1	1/1	1/1	1/0	1/1
NC_037340.1:75941573-75941709(+)	BosSINEL	50.19	49.81	532	528	15	502	13	6	1/0	1/0	1/0	1/0	1/0	1/0	1/0	1/0	1/0	1/0	1/0	1/0	1/0	1/0	1/0	1/0	1/0	1/0	1/0	1/0	1/0	1/0	1/0	1/0	1/0	1/0	1/0	1/0	1/0	1/0	1/0	1/0	1/0	1/0	1/0	1/0	1/0	1/0	1/0	1/0
NC_037340.1:76300428-76300710(+)	BosSINEL	58.16	41.84	613	441	90	433	4	9	1/0	1/0	1/0	1/0	1/0	1/0	1/0	1/0	1/0	1/0	1/0	1/1	1/0	1/0	1/1	1/0	1/0	1/1	1/0	1/1	1/0	1/1	1/0	1/1	1/0	1/0	1/0	1/0	1/1	1/1	1/1	1/1	1/0	1/0	1/0	1/0	1/1	1/1	1/0	1/0
NC_037340.1:76778875-76779002(-)	BosSINEL	52.18	47.82	550	504	27	496	4	9	1/0	1/0	1/0	1/0	1/1	1/0	1/0	1/0	1/0	1/0	1/0	1/0	1/0	1/0	1/1	1/0	1/0	1/0	1/0	1/0	1/0	1/0	1/0	1/0	1/0	1/0	1/0	1/0	1/0	1/0	1/0	1/0	1/0	1/0	1/0	1/0	1/0	1/0	1/0	1/0
NC_037340.1:77125541-77125806(+)	BosSINEL	61.63	38.37	657	409	128	401	4	3	1/0	1/0	1/1	1/0	1/0	1/0	1/0	1/0	1/0	1/0	1/0	1/0	1/0	1/0	1/0	1/0	1/0	1/0	1/0	1/0	1/0	1/0	1/0	1/0	1/0	1/0	1/0	1/0	1/0	1/0	1/0	1/0	1/0	1/0	1/0	1/0	1/0	1/0	1/0	1/0
NC_037340.1:79155768-79156045(-)	BosSINEL	76.3	23.7	792	246	283	226	10	17	1/0	1/1	1/0	1/0	1/0	1/1	1/1	1/0	1/0	NA	1/1	1/0	1/1	1/1	1/1	1/0	1/1	1/0	1/1	1/1	1/1	1/0	1/1	1/1	1/0	1/0	1/1	1/1	1/0	1/1	1/1	1/0	1/1	1/0	1/0	1/0	1/1	1/0	1/1	1/1
NC_037340.1:80206520-80206601(+)	BosSINEL	49.81	50.19	528	532	4	520	6	6	1/0	1/0	1/0	1/0	1/0	1/0	1/0	1/0	1/0	1/0	1/0	1/0	1/0	1/0	1/0	1/0	1/0	1/0	1/0	1/0	1/0	1/0	1/0	1/0	1/0	1/0	1/0	1/0	1/0	1/0	1/0	1/0	1/0	1/0	1/0	1/0	1/0	1/0	1/0	1/0
NC_037340.1:80261171-80261206(+)	BosSINEL	77.33	22.67	812	238	289	234	2	11	1/0	1/0	1/1	1/1	1/1	1/0	1/1	1/1	1/0	1/0	1/0	1/0	1/0	1/0	1/1	1/1	1/0	1/1	1/0	1/0	1/0	1/0	1/1	1/0	1/0	1/0	1/0	1/1	1/0	1/0	1/0	1/1	1/0	1/1	1/0	1/0	1/0	1/0	1/0	1/1
NC_037340.1:80353391-80353662(+)	BosSINEL	78.27	21.73	825	229	299	227	1	9	1/1	1/1	1/1	1/1	1/1	1/1	1/0	1/0	1/0	1/0	1/1	1/0	1/0	1/1	1/0	1/1	1/0	1/0	1/0	1/0	1/0	1/1	1/0	1/0	1/0	1/0	1/0	1/0	1/1	1/1	1/1	1/0	1/0	1/0	1/0	1/0	1/1	1/0	1/1	1/0
NC_037340.1:80844683-80844957(+)	BosSINEL	85.52	14.48	886	150	368	150	0	18	1/1	1/1	1/1	1/1	1/1	1/1	1/1	1/1	1/1	1/1	1/1	1/1	1/1	1/1	1/1	1/0	1/1	1/1	1/1	1/1	1/1	1/1	1/1	1/1	1/1	1/1	1/1	1/1	1/1	1/1	1/1	1/0	1/1	1/1	1/1	1/1	1/1	1/1	1/1	1/1
NC_037340.1:80977312-80977579(+)	BosSINEL	48.69	51.31	522	550	0	522	14	0	1/0	1/0	1/0	1/0	1/0	1/0	1/0	1/0	1/0	1/0	1/0	1/0	1/0	1/0	1/0	1/0	1/0	1/0	1/0	1/0	1/0	1/0	1/0	1/0	1/0	1/0	1/0	1/0	1/0	1/0	1/0	1/0	1/0	1/0	1/0	1/0	1/0	1/0	1/0	1/0
NC_037340.1:81557339-81557612(-)	BosSINEL	77.03	22.97	798	238	280	238	0	18	1/1	1/1	1/1	1/1	1/1	1/1	1/0	1/0	1/0	1/0	1/0	1/0	1/0	1/0	1/0	1/1	1/1	1/0	1/0	1/0	1/1	1/1	1/0	1/0	1/1	1/1	1/0	1/0	1/0	1/0	1/0	1/0	1/0	1/0	1/0	1/1	1/0	1/1	1/0	1/0
NC_037340.1:81994888-81994922(-)	BosSINEL	55.57	44.43	579	463	58	463	0	15	1/0	1/0	1/0	1/0	1/0	1/0	1/0	1/0	1/0	1/0	1/0	1/0	1/0	1/0	1/1	1/0	1/0	1/0	1/0	1/0	1/1	1/0	1/1	1/0	1/0	1/0	1/0	1/0	1/0	1/0	1/0	1/1	1/0	1/0	1/0	1/0	1/0	1/0	1/0	1/0
NC_037340.1:83170799-83171026(+)	BosSINEL	47	53	501	565	1	499	33	3	1/0	1/0	1/0	1/0	1/0	1/0	1/0	1/0	1/0	1/0	1/0	1/0	1/0	1/0	1/0	1/0	1/0	1/0	1/0	1/0	1/0	1/0	1/0	1/0	1/0	1/0	1/0	1/0	1/0	1/0	1/0	1/0	1/0	1/0	1/0	1/0	1/0	1/0	1/0	1/0
NC_037340.1:83282483-83282754(+)	BosSINEL	83.17	16.83	875	177	350	175	1	10	1/1	1/1	1/1	1/1	1/0	1/0	1/0	1/1	1/1	1/0	1/1	1/0	1/0	1/0	1/0	1/0	1/0	1/0	1/0	1/0	1/1	1/1	1/0	1/0	1/0	1/0	1/0	1/0	1/0	1/0	1/0	1/0	1/0	1/1	1/1	1/1	1/0	1/0	1/0	1/0
NC_037340.1:83459275-83459407(+)	BosSINEL	49.34	50.66	523	537	0	523	7	6	1/0	1/0	1/0	1/0	1/0	1/0	1/0	1/0	1/0	1/0	1/0	1/0	1/0	1/0	1/0	1/0	1/0	1/0	1/0	1/0	1/0	1/0	1/0	1/0	1/0	1/0	1/0	1/0	1/0	1/0	1/0	1/0	1/0	1/0	1/0	1/0	1/0	1/0	1/0	1/0
NW_020191576.1:22900-23170(-)	BosSINEL	51.23	48.77	543	517	14	515	1	6	1/0	1/0	1/0	1/0	1/0	1/0	1/0	1/0	1/0	1/0	1/0	1/0	1/0	1/0	1/0	1/0	1/0	1/0	1/0	1/0	1/0	1/0	1/0	1/0	1/0	1/0	1/0	1/0	1/0	1/0	1/0	1/0	1/0	1/0	1/0	1/0	1/0	1/0	1/0	1/0
NW_020191578.1:58604-58880(+)	BosSINEL	51.93	48.07	538	498	128	282	108	18	1/0	1/0	1/0	1/1	0/0	0/0	1/0	1/0	1/1	1/0	1/0	1/0	1/1	1/1	1/1	0/0	1/0	0/0	0/0	1/0	1/1	1/1	1/0	1/1	1/1	1/0	1/0	1/1	1/0	1/0	1/0	0/0	1/0	1/0	1/0	1/0	0/0	1/0	1/0	0/0
NW_020191578.1:60064-60185(-)	BosSINEL	50	50	502	502	96	310	96	34	1/1	1/0	1/1	1/1	0/0	0/0	1/1	1/0	0/0	1/0	1/0	1/0	1/0	1/0	1/1	NA	1/0	NA	NA	1/0	1/1	1/0	1/0	1/1	1/1	1/0	1/1	1/1	0/0	1/0	1/0	0/0	1/0	1/0	1/1	1/0	0/0	1/0	1/0	0/0
NW_020191578.1:94624-94892(+)	BosSINEL	31.34	68.66	309	677	34	241	218	43	0/0	1/0	0/0	1/0	0/0	0/0	0/0	1/0	0/0	1/0	1/0	1/0	1/0	1/1	0/0	0/0	1/0	0/0	0/0	1/0	0/0	1/0	0/0	1/0	0/0	0/0	0/0	1/0	NA	1/0	0/0	0/0	0/0	0/0	0/0	1/0	0/0	0/0	NA	0/0
NW_020191578.1:256753-257003(+)	BosSINEL	73.5	26.5	760	274	246	268	3	19	1/0	1/0	1/0	1/1	1/1	1/1	1/0	1/1	1/0	1/1	1/1	1/0	1/1	1/0	1/1	1/0	1/0	1/0	1/1	1/0	NA	1/1	1/0	1/1	1/1	1/1	1/0	1/1	1/0	1/0	1/0	1/1	1/1	1/0	1/1	1/0	1/1	1/0	1/1	1/0
NW_020191578.1:275537-275809(-)	BosSINEL	27.04	72.96	285	769	0	285	242	9	0/0	1/0	0/0	0/0	1/0	0/0	0/0	0/0	1/0	1/0	1/0	1/0	1/0	1/0	0/0	0/0	1/0	0/0	0/0	0/0	0/0	1/0	0/0	0/0	0/0	1/0	0/0	0/0	1/0	1/0	1/0	1/0	1/0	1/0	0/0	1/0	0/0	0/0	1/0	0/0
NW_020191578.1:321154-321249(-)	BosSINEL	63.61	36.39	673	385	152	369	8	7	1/1	1/0	1/1	1/0	1/1	1/1	1/0	1/0	1/0	1/0	1/0	1/0	1/0	1/0	1/0	1/1	1/0	1/1	1/1	1/0	1/1	1/0	1/0	1/0	1/0	1/0	1/0	1/0	1/1	1/0	1/1	1/1	1/0	1/1	1/0	1/0	1/1	1/1	1/0	1/1
NW_020191578.1:593308-593584(-)	BosSINEL	41.02	58.98	434	624	35	364	130	7	1/0	1/0	1/0	1/0	0/0	1/0	0/0	1/0	0/0	1/0	1/0	1/0	1/1	1/0	1/0	0/0	1/0	1/0	1/0	1/0	1/0	1/0	1/0	1/0	1/0	1/0	0/0	1/0	1/0	1/0	1/0	0/0	1/0	1/0	0/0	1/0	1/0	1/1	1/0	0/0
NW_020191629.1:114499-114768(+)	BosSINEL	78.98	21.02	834	222	306	222	0	8	1/1	1/1	1/1	1/0	1/0	1/1	1/1	1/0	1/0	1/1	1/0	1/0	1/1	1/0	1/0	1/1	1/1	1/1	1/1	1/1	1/0	1/1	1/1	1/1	1/1	1/1	1/1	1/0	1/1	1/1	1/1	1/0	1/0	1/1	1/1	1/0	1/0	1/0	1/1	1/0
NW_020191629.1:130267-130536(+)	BosSINEL	77.75	22.25	821	235	294	233	1	8	1/1	1/1	1/1	1/1	1/1	1/1	1/0	1/0	1/1	1/1	1/1	1/1	1/1	1/1	1/0	1/1	1/1	1/1	1/1	1/1	1/0	1/1	1/0	1/1	1/1	1/1	1/0	1/1	1/1	1/1	1/1	1/1	1/1	1/1	1/0	1/1	1/1	1/0	1/1	1/1
NC_037341.1:124939-125208(-)	BosSINEL	79.19	20.81	803	211	301	201	5	29	1/0	1/0	1/0	1/0	1/0	1/0	1/1	1/1	1/0	1/1	1/1	1/1	1/0	1/0	1/0	1/0	1/1	1/1	1/1	1/1	1/0	1/0	1/1	1/1	1/1	1/1	1/1	1/1	1/1	1/0	1/0	1/1	1/1	1/1	1/1	1/0	1/1	1/0	1/1	1/0
NC_037341.1:141558-141677(-)	BosSINEL	50.85	49.15	538	520	14	510	5	7	1/0	1/0	1/0	1/0	1/0	1/0	1/0	1/0	1/0	1/0	1/0	1/0	1/0	1/0	1/0	1/0	1/0	1/0	1/0	1/0	1/0	1/0	1/0	1/0	1/0	1/0	1/0	1/0	1/0	1/0	1/0	1/0	1/0	1/0	1/0	1/0	1/0	1/0	1/0	1/0
NC_037341.1:221023-221290(-)	BosSINEL	56.03	43.97	595	467	70	455	6	5	1/0	1/0	1/0	1/0	1/0	1/0	1/0	1/0	1/0	1/0	1/0	1/0	1/0	1/0	1/0	1/0	1/0	1/0	1/0	1/0	1/0	1/0	1/0	1/0	1/1	1/0	1/1	1/0	1/0	1/0	1/0	1/0	1/0	1/0	1/0	1/0	1/0	1/1	1/0	1/0
NC_037341.1:522471-522747(+)	BosSINEL	49.34	50.66	525	539	2	521	9	4	1/0	1/0	1/0	1/0	1/0	1/0	1/0	1/0	1/0	1/0	1/0	1/0	1/0	1/0	1/0	1/0	1/0	1/0	1/0	1/0	1/0	1/0	1/0	1/0	1/0	1/0	1/0	1/0	1/0	1/0	1/0	1/0	1/0	1/0	1/0	1/0	1/0	1/0	1/0	1/0
NC_037341.1:790507-790633(+)	BosSINEL	72.18	27.82	755	291	234	287	2	13	1/0	1/0	1/1	1/0	1/1	1/1	1/1	1/1	1/0	1/1	1/1	1/0	1/1	1/1	1/1	1/1	1/1	1/0	1/1	1/0	1/1	0/0	1/1	1/1	1/0	1/1	1/1	1/1	1/1	1/1	1/0	1/1	1/1	1/1	1/0	1/1	1/0	1/0	1/0	1/0
NC_037341.1:1461365-1461634(+)	BosSINEL	48.6	51.4	521	551	0	521	15	0	1/0	1/0	1/0	1/0	1/0	1/0	1/0	1/0	1/0	1/0	1/0	1/0	1/0	1/0	1/0	1/0	1/0	1/0	1/0	1/0	1/0	1/0	1/0	1/0	1/0	1/0	1/0	1/0	1/0	1/0	1/0	1/0	1/0	1/0	1/0	1/0	1/0	1/0	1/0	1/0
NC_037341.1:3339718-3339978(+)	BosSINEL	57.55	42.45	610	450	88	434	8	6	1/0	1/0	1/0	1/0	1/1	1/0	1/0	1/0	1/0	1/0	1/0	1/0	1/0	1/0	1/0	1/0	1/0	1/0	1/0	1/0	1/0	1/1	1/0	1/0	1/0	1/0	1/0	1/0	1/0	1/0	1/1	1/0	1/0	1/0	1/0	1/0	1/0	1/0	1/0	1/0
NC_037341.1:3800785-3801058(-)	BosSINEL	54.06	45.94	573	487	53	467	10	6	1/0	1/0	1/0	1/0	1/0	1/0	1/0	1/0	1/0	1/0	1/0	1/1	1/0	1/0	1/0	1/0	1/0	1/0	1/0	1/0	1/0	1/0	1/0	1/0	1/0	1/0	1/0	1/0	1/0	1/0	1/0	1/0	1/0	1/0	1/0	1/1	1/0	1/0	1/0	1/1
NC_037341.1:4817285-4817556(+)	BosSINEL	72.8	27.2	760	284	241	278	3	14	1/0	1/0	1/0	1/0	1/0	1/1	1/1	1/1	1/1	1/0	1/1	1/1	1/1	1/1	1/1	1/1	1/1	1/1	1/1	1/1	1/1	1/1	1/0	1/1	1/1	1/1	1/1	1/1	1/0	1/1	1/1	1/1	1/1	1/1	1/1	1/1	1/1	1/1	1/1	1/1
NC_037341.1:5344618-5344883(+)	BosSINEL	48.31	51.69	516	552	0	516	18	2	1/0	1/0	1/0	1/0	1/0	1/0	1/0	1/0	1/0	1/0	1/0	1/0	1/0	1/0	1/0	1/0	1/0	1/0	1/0	1/0	1/0	1/0	1/0	1/0	1/0	1/0	1/0	1/0	1/0	1/0	1/0	1/0	1/0	1/0	1/0	1/0	1/0	1/0	1/0	1/0
NC_037341.1:5864059-5864159(+)	BosSINEL	67.77	32.23	717	341	191	335	3	7	1/0	1/0	1/1	1/0	1/0	1/1	1/0	1/0	1/0	1/1	1/0	1/0	1/0	1/0	1/1	1/1	1/0	1/0	1/1	1/0	1/0	1/0	1/0	1/0	1/0	1/0	1/0	1/0	1/0	1/0	1/0	1/1	1/0	1/0	1/0	1/0	1/0	1/0	1/1	1/0
NC_037341.1:5929824-5930098(-)	BosSINEL	52.18	47.82	550	504	28	494	5	9	1/0	1/0	1/0	1/0	1/0	1/0	1/0	1/0	1/0	1/0	1/0	1/0	1/0	1/0	1/0	1/0	1/0	1/0	1/0	1/0	1/1	1/0	1/0	1/0	1/0	1/0	1/0	1/0	1/0	1/0	1/0	1/0	1/0	1/0	1/0	1/0	1/0	1/0	1/0	1/0
NC_037341.1:6955917-6956189(+)	BosSINEL	75.38	24.62	793	259	268	257	1	10	1/0	1/0	1/1	1/0	1/0	1/1	1/0	1/0	1/0	1/1	1/1	1/1	1/1	1/0	1/1	1/0	1/1	1/1	1/0	1/0	1/1	1/1	1/0	1/0	1/1	1/1	1/1	1/0	1/1	1/0	1/1	1/1	1/0	1/0	1/0	1/1	1/0	1/0	1/0	1/1
NC_037341.1:7724356-7724632(-)	BosSINEL	48.97	51.03	523	545	0	523	11	2	1/0	1/0	1/0	1/0	1/0	1/0	1/0	1/0	1/0	1/0	1/0	1/0	1/0	1/0	1/0	1/0	1/0	1/0	1/0	1/0	1/0	1/0	1/0	1/0	1/0	1/0	1/0	1/0	1/0	1/0	1/0	1/0	1/0	1/0	1/0	1/0	1/0	1/0	1/0	1/0
NC_037341.1:10980569-10980844(-)	BosSINEL	79.96	20.04	846	212	318	210	1	7	1/0	1/0	1/0	1/1	1/0	1/1	1/1	1/1	1/0	1/1	1/0	1/1	1/0	1/0	1/1	1/1	1/0	1/0	1/1	1/1	1/1	1/0	1/0	1/1	1/0	1/0	1/1	1/1	1/1	1/1	1/0	1/0	1/1	1/1	1/0	1/1	1/1	1/0	1/1	1/0
NC_037341.1:11139098-11139358(+)	BosSINEL	65.6	34.4	694	364	168	358	3	7	1/0	1/0	1/0	1/0	1/0	1/0	1/0	1/1	1/0	1/0	1/0	1/0	1/0	1/0	1/0	1/0	1/0	1/0	1/0	1/0	1/0	1/0	1/0	1/0	1/0	1/0	1/1	1/0	1/1	1/0	1/0	1/0	1/0	1/0	1/0	1/0	1/0	1/1	1/0	1/0
NC_037341.1:13335195-13335470(-)	BosSINEL	81.2	18.8	864	200	333	198	1	4	1/1	1/1	1/0	1/1	1/0	1/0	1/0	1/1	1/1	1/0	1/0	1/0	1/0	1/0	1/0	1/0	1/0	1/1	1/1	1/0	1/1	1/1	1/0	1/0	1/0	1/1	1/1	1/1	1/0	1/0	1/1	1/0	1/0	1/1	1/1	1/0	1/1	1/1	1/1	1/0
NC_037341.1:13684697-13684972(+)	BosSINEL	50.28	49.72	530	524	7	516	4	9	1/0	1/0	1/0	1/0	1/0	1/0	1/0	1/0	1/0	1/0	1/0	1/0	1/0	1/0	1/0	1/0	1/0	1/0	1/0	1/0	1/0	0/0	1/0	1/0	1/0	1/0	1/0	1/0	1/0	1/0	1/0	1/0	1/0	1/0	1/0	1/0	1/0	1/0	1/0	1/0
NC_037341.1:13694535-13694668(+)	BosSINEL	43.4	56.6	460	600	0	460	70	6	1/0	1/0	1/0	1/0	1/0	1/0	1/0	1/0	1/0	1/0	1/0	1/0	1/0	1/0	1/0	1/0	1/0	1/0	1/0	1/0	1/0	0/0	1/0	0/0	1/0	1/0	1/0	1/0	0/0	1/0	1/0	1/0	1/0	1/0	1/0	1/0	1/0	1/0	1/0	1/0
NC_037341.1:15622577-15622852(-)	BosSINEL	84.66	15.34	894	162	367	160	1	8	1/1	1/1	1/1	1/1	1/0	1/1	1/0	1/0	1/1	1/1	1/1	1/1	1/0	1/0	1/0	1/1	1/1	1/1	1/1	1/0	1/0	1/1	1/1	1/0	1/1	1/1	1/1	1/0	1/0	1/0	1/0	1/0	1/0	1/1	1/1	1/0	1/0	1/0	1/1	1/0
NC_037341.1:16422334-16422379(+)	BosSINEL	61.5	38.5	647	405	121	405	0	10	1/0	1/0	1/1	1/0	1/1	1/0	1/1	1/0	1/0	1/0	1/1	1/0	1/0	1/0	1/0	1/0	1/1	1/0	1/1	1/0	1/0	1/0	1/0	1/0	1/0	1/0	1/0	1/0	1/0	1/0	1/0	1/0	1/0	1/0	1/0	1/0	1/0	1/0	1/0	1/0
NC_037341.1:16422636-16422662(+)	BosSINEL	52.28	47.72	550	502	24	502	0	10	1/0	1/0	1/0	1/0	1/0	1/0	1/0	1/0	1/0	1/0	1/0	1/0	1/0	1/0	1/0	1/0	1/0	1/0	1/0	1/0	1/0	1/0	1/0	1/0	1/0	1/0	1/0	1/0	1/0	1/0	1/0	1/0	1/0	1/0	1/0	1/0	1/0	1/0	1/0	1/0
NC_037341.1:17496395-17496671(+)	BosSINEL	48.77	51.23	517	543	1	515	14	6	1/0	1/0	1/0	1/0	1/0	1/0	1/0	1/0	1/0	1/0	1/0	1/0	1/0	1/0	1/0	1/0	1/0	1/0	1/0	1/0	1/0	1/0	1/0	1/0	1/0	1/0	1/0	1/0	1/0	1/0	1/0	1/0	1/0	1/0	1/0	1/0	1/0	1/0	1/0	1/0
NC_037341.1:17510143-17510399(+)	BosSINEL	55.31	44.69	583	471	60	463	4	9	1/0	1/0	1/0	1/0	1/0	1/1	1/0	1/0	1/0	1/0	1/0	1/0	1/0	1/0	1/0	1/0	1/0	1/0	1/0	1/0	1/0	1/0	1/0	1/0	1/0	1/0	1/0	1/1	1/0	1/0	1/0	1/0	1/0	1/0	1/0	1/1	1/0	1/0	1/1	1/0
NC_037341.1:17795507-17795596(+)	BosSINEL	83.46	16.54	873	173	356	161	6	13	1/1	1/1	1/1	1/1	1/0	1/0	1/1	1/0	1/0	1/1	1/0	1/0	1/0	1/0	1/1	1/1	1/1	1/0	1/0	1/0	1/0	1/0	1/1	1/0	1/1	1/0	1/1	1/0	1/1	1/0	1/1	1/1	1/1	1/0	1/0	1/0	1/0	1/0	1/0	1/0
NC_037341.1:17850802-17851078(-)	BosSINEL	48.88	51.12	524	548	0	524	12	0	1/0	1/0	1/0	1/0	0/0	1/0	1/0	1/0	1/0	1/0	1/0	1/0	1/0	1/0	1/0	1/0	1/0	1/0	1/0	1/0	1/0	1/0	1/0	1/0	1/0	1/0	1/0	1/0	1/0	1/0	1/0	1/0	1/0	1/0	1/0	1/0	1/0	1/0	1/0	1/0
NC_037341.1:18030817-18031074(+)	BosSINEL	48.87	51.13	518	542	0	518	12	6	1/0	1/0	1/0	1/0	1/0	1/0	1/0	1/0	1/0	1/0	1/0	1/0	1/0	1/0	1/0	1/0	1/0	1/0	1/0	1/0	1/0	1/0	1/0	1/0	1/0	1/0	1/0	1/0	1/0	1/0	1/0	1/0	1/0	1/0	1/0	1/0	1/0	1/0	1/0	1/0
NC_037341.1:18533523-18533663(+)	BosSINEL	52.46	47.54	554	502	30	494	4	8	1/0	1/0	1/0	1/0	1/1	1/0	1/0	1/0	1/0	1/0	1/0	1/0	1/0	1/0	1/0	1/0	1/0	1/0	1/0	1/0	1/0	1/0	1/0	1/0	1/0	1/0	1/1	1/0	1/0	1/0	1/0	1/0	1/0	1/0	1/0	1/0	1/0	1/0	1/0	1/0
NC_037341.1:18809347-18809620(+)	BosSINEL	49.81	50.19	526	530	4	518	6	8	1/0	1/0	1/0	1/0	1/0	1/0	1/0	1/0	1/0	1/0	1/0	1/0	1/0	1/0	1/0	1/0	1/0	1/0	1/0	1/0	1/0	1/0	1/0	1/0	1/0	1/0	1/0	1/0	1/0	1/0	1/0	1/0	1/0	1/0	1/0	1/0	1/0	1/0	1/0	1/0
NC_037341.1:18820056-18820160(-)	BosSINEL	65.84	34.16	690	358	168	354	2	12	1/1	1/0	1/0	1/0	1/0	1/0	1/1	1/1	1/1	1/0	1/0	1/0	1/1	1/0	1/0	1/1	1/1	1/0	1/0	1/0	1/1	1/0	1/0	1/0	1/1	1/0	1/1	1/1	1/1	1/1	1/1	1/1	1/0	1/1	1/1	1/0	1/1	1/0	1/0	1/1
NC_037341.1:19024357-19024625(-)	BosSINEL	65.55	34.45	683	359	174	335	12	15	1/1	1/0	1/0	1/0	1/0	1/1	1/1	1/0	1/1	1/1	1/0	1/1	1/0	1/1	1/1	1/0	1/0	1/0	1/0	1/0	1/0	1/0	1/1	1/1	1/0	1/0	1/1	1/0	1/0	1/0	1/0	1/0	1/1	1/1	1/1	1/1	1/1	1/1	1/0	1/0
NC_037341.1:19074106-19074304(+)	BosSINEL	51.7	48.3	548	512	22	504	4	6	1/0	1/0	1/0	1/0	1/0	1/0	1/0	1/0	1/0	1/0	1/0	1/0	1/0	1/1	1/0	1/0	1/0	1/0	1/0	1/0	1/0	1/0	1/0	1/0	1/0	1/0	1/0	1/0	1/0	1/0	1/0	1/0	1/0	1/0	1/0	1/0	1/0	1/0	1/0	1/0
NC_037341.1:19404707-19404937(-)	BosSINEL	49.43	50.57	523	535	2	519	8	7	1/0	1/0	1/0	1/0	1/0	1/0	1/0	1/0	1/0	1/0	1/0	1/0	1/0	1/0	1/0	1/0	1/0	1/0	1/0	1/0	1/0	1/0	1/0	1/0	1/0	1/0	1/0	1/0	1/0	1/0	1/0	1/0	1/0	1/0	1/0	1/0	1/0	1/0	1/0	1/0
NC_037341.1:19419265-19419535(-)	BosSINEL	48.87	51.13	518	542	0	518	12	6	1/0	1/0	1/0	1/0	1/0	1/0	1/0	1/0	1/0	1/0	1/0	1/0	1/0	1/0	1/0	1/0	1/0	1/0	1/0	1/0	1/0	1/0	1/0	1/0	1/0	1/0	1/0	1/0	1/0	1/0	1/0	1/0	1/0	1/0	1/0	1/0	1/0	1/0	1/0	1/0
NC_037341.1:20339039-20339298(+)	BosSINEL	83.59	16.41	881	173	355	171	1	9	1/1	1/0	1/1	1/1	1/0	1/1	1/0	1/1	1/1	1/0	1/0	1/1	1/0	1/1	1/1	1/1	1/0	1/1	1/0	1/0	1/0	1/0	1/1	1/1	1/0	1/1	1/1	1/0	1/0	1/0	1/0	1/0	1/1	1/1	1/0	1/1	1/1	1/0	1/0	1/0
NC_037341.1:20797954-20798228(-)	BosSINEL	74.86	25.14	792	266	265	262	2	7	1/0	1/0	1/0	1/1	1/1	1/0	1/1	1/1	1/0	1/0	1/0	1/0	1/0	1/1	1/0	1/0	1/0	1/0	1/0	1/1	1/0	1/0	1/0	1/1	1/0	1/1	1/0	1/1	1/1	1/1	1/0	1/1	1/0	1/0	1/0	1/0	1/0	1/0	1/0	1/0
NC_037341.1:20809226-20809358(+)	BosSINEL	52.66	47.34	554	498	32	490	4	10	1/0	1/0	1/0	1/0	1/0	1/0	1/0	1/0	1/0	1/0	1/0	1/0	1/0	1/0	1/0	1/0	1/0	1/0	1/0	1/0	1/0	1/0	1/0	1/0	1/0	1/0	1/0	1/0	1/0	1/0	1/0	1/0	1/0	1/0	1/0	1/0	1/0	1/0	1/0	1/0
NC_037341.1:21312391-21312654(-)	BosSINEL	50.28	49.72	533	527	8	517	5	6	1/0	1/0	1/0	1/0	1/0	1/0	1/0	1/0	1/0	1/0	1/0	1/0	1/0	1/0	1/0	1/0	1/0	1/0	1/0	1/0	1/0	1/0	1/0	1/0	1/0	1/0	1/0	1/0	1/0	1/0	1/0	1/0	1/0	1/0	1/0	1/0	1/0	1/0	1/0	1/0
NC_037341.1:21680361-21680637(+)	BosSINEL	59.07	40.93	625	433	99	427	3	7	1/0	1/0	1/0	1/0	1/1	1/0	1/0	1/0	1/0	1/0	1/1	1/1	1/0	1/1	1/0	1/0	1/0	1/0	1/0	1/0	1/0	1/0	1/0	1/0	1/0	1/0	1/0	1/0	1/0	1/0	1/0	1/0	1/0	1/0	1/0	1/1	1/1	1/0	1/1	1/0
NC_037341.1:21837366-21837416(-)	BosSINEL	49.91	50.09	529	531	2	525	3	6	1/0	1/0	1/0	1/0	1/0	1/0	1/0	1/0	1/0	1/0	1/0	1/0	1/0	1/0	1/0	1/0	1/0	1/0	1/0	1/0	1/0	1/0	1/0	1/0	1/0	1/0	1/0	1/0	1/0	1/0	1/0	1/0	1/0	1/0	1/0	1/0	1/0	1/0	1/0	1/0
NC_037341.1:22351571-22351844(+)	BosSINEL	49.16	50.84	527	545	0	527	9	0	1/0	1/0	1/0	1/0	1/0	1/0	1/0	1/0	1/0	1/0	1/0	1/0	1/0	1/0	1/0	1/0	1/0	1/0	1/0	1/0	1/0	1/0	1/0	1/0	1/0	1/0	1/0	1/0	1/0	1/0	1/0	1/0	1/0	1/0	1/0	1/0	1/0	1/0	1/0	1/0
NC_037341.1:26712495-26712760(-)	BosSINEL	67.5	32.5	706	340	193	320	10	13	1/1	1/0	1/0	1/1	1/1	1/1	1/1	1/0	1/1	1/0	1/1	1/0	1/1	1/0	1/1	1/0	1/0	1/1	1/1	1/0	1/0	1/1	1/0	1/1	1/0	1/0	1/0	1/1	1/1	1/0	1/0	1/0	1/1	1/0	1/1	1/0	1/1	1/0	1/0	1/0
NC_037341.1:27297839-27298113(-)	BosSINEL	50	50	529	529	15	499	15	7	1/0	1/0	1/0	1/0	1/0	1/0	1/0	1/0	1/0	1/0	1/0	1/0	1/0	1/0	1/0	1/0	1/0	1/0	1/0	1/0	1/0	1/0	1/0	1/0	1/0	1/0	1/0	1/0	1/0	1/0	1/0	1/0	1/0	1/0	1/0	1/0	1/0	1/0	1/0	1/0
NC_037341.1:27733165-27733438(-)	BosSINEL	50.57	49.43	536	524	12	512	6	6	1/0	1/0	1/0	1/0	1/0	1/0	1/0	1/0	1/0	1/0	1/0	1/0	1/0	1/0	1/0	1/0	1/0	1/0	1/0	1/0	1/0	1/0	1/0	1/0	1/0	1/0	1/0	1/0	1/0	1/0	1/0	1/0	1/0	1/0	1/0	1/0	1/0	1/0	1/0	1/0
NC_037341.1:27914431-27914563(+)	BosSINEL	49.63	50.37	530	538	3	524	7	2	1/0	1/0	1/0	1/0	1/0	1/0	1/0	1/0	1/0	1/0	1/0	1/0	1/0	1/0	1/0	1/0	1/0	1/0	1/0	1/0	1/0	1/0	1/0	1/0	1/0	1/0	1/0	1/0	1/0	1/0	1/0	1/0	1/0	1/0	1/0	1/0	1/0	1/0	1/0	1/0
NC_037341.1:28489797-28490072(+)	BosSINEL	48.97	51.03	523	545	0	523	11	2	1/0	1/0	1/0	1/0	1/0	1/0	1/0	1/0	1/0	1/0	1/0	1/0	1/0	1/0	1/0	1/0	1/0	1/0	1/0	1/0	1/0	1/0	1/0	1/0	1/0	1/0	1/0	1/0	1/0	1/0	1/0	1/0	1/0	1/0	1/0	1/0	1/0	1/0	1/0	1/0
NC_037341.1:28724359-28724623(-)	BosSINEL	53.78	46.22	569	489	51	467	11	7	1/0	1/0	1/0	1/0	1/0	1/0	1/0	1/0	1/0	1/0	1/0	1/1	1/0	1/0	1/0	1/1	1/0	1/0	1/0	1/0	1/0	1/0	1/0	1/0	1/0	1/0	1/0	1/0	1/0	1/0	1/0	1/0	1/0	1/0	1/0	1/0	1/0	1/0	1/0	1/0
NC_037341.1:29090631-29090733(-)	BosSINEL	67.14	32.86	709	347	182	345	1	8	1/1	1/1	1/0	1/0	1/1	1/0	1/0	1/1	1/1	1/1	1/1	1/1	1/0	1/0	1/0	1/0	1/1	1/0	1/0	1/0	1/0	1/0	1/1	1/0	1/0	1/0	1/1	1/0	1/0	1/1	1/0	1/0	1/1	1/0	1/0	1/1	1/0	1/0	1/0	1/0
NC_037341.1:29190550-29190721(+)	BosSINEL	67.65	32.35	709	339	190	329	5	12	1/0	1/1	1/0	1/0	1/1	1/0	1/1	1/0	1/0	1/1	1/1	1/1	1/1	1/0	1/1	1/1	1/0	1/1	1/0	1/1	1/0	1/0	1/0	1/0	1/1	1/1	1/0	1/1	1/0	1/0	1/0	1/0	1/0	1/1	1/0	0/0	1/1	1/0	1/0	1/1
NC_037341.1:29410215-29410480(-)	BosSINEL	52.74	47.26	559	501	39	481	10	6	1/0	1/0	1/0	1/0	1/0	1/0	1/0	1/0	1/0	1/0	1/0	1/0	1/0	1/0	1/0	1/0	1/0	1/0	1/0	1/0	1/0	1/0	1/0	1/0	1/0	1/0	1/0	1/0	1/0	1/0	1/0	1/0	1/0	1/0	1/0	1/0	1/0	1/0	1/0	1/0
NC_037341.1:29530267-29530353(-)	BosSINEL	68.51	31.49	681	313	184	313	0	39	1/0	1/0	1/0	1/0	1/1	1/1	1/0	1/0	1/0	1/0	1/1	1/1	1/1	1/0	1/1	1/1	1/1	1/0	1/1	1/1	1/0	1/1	1/0	1/0	1/0	1/1	1/0	1/1	1/0	1/0	1/0	1/0	1/1	1/1	1/0	1/0	1/0	1/0	1/0	1/0
NC_037341.1:29530364-29530450(-)	BosSINEL	84.2	15.8	879	165	357	165	0	14	1/0	1/1	1/1	1/1	1/1	1/1	1/1	1/0	1/1	1/1	1/1	1/0	1/1	1/1	1/1	1/1	1/0	1/1	1/1	1/1	1/0	1/1	1/0	1/0	1/1	1/0	1/0	1/1	1/1	1/1	1/1	1/0	1/1	1/1	1/1	1/0	1/1	1/0	1/1	1/0
NC_037341.1:29776590-29776716(-)	BosSINEL	62.43	37.57	658	396	131	396	0	9	1/1	1/0	1/0	1/0	1/1	1/1	1/0	1/0	1/0	1/0	1/0	1/1	1/0	1/1	1/0	1/1	1/1	1/0	1/1	1/0	1/1	1/1	1/0	1/1	1/0	1/0	1/0	1/0	1/1	1/0	1/0	1/0	1/0	1/0	1/0	1/0	1/0	1/0	1/0	1/0
NC_037341.1:29783459-29783575(-)	BosSINEL	59.45	40.55	629	429	103	423	3	7	1/0	1/0	1/0	1/0	1/0	1/0	1/0	1/0	1/0	1/0	1/0	1/0	1/0	1/0	1/1	1/0	1/0	1/0	1/0	1/1	1/1	1/0	1/0	1/0	1/0	1/0	1/0	1/0	1/0	1/1	1/0	1/1	1/0	1/0	1/1	1/0	1/0	1/0	1/0	1/0
NC_037341.1:29943978-29944252(-)	BosSINEL	48.96	51.04	520	542	7	506	18	5	1/0	1/0	1/0	1/0	1/0	1/0	1/0	1/0	1/0	1/0	1/0	1/0	1/0	1/0	1/0	1/0	1/0	1/0	1/0	1/0	1/0	1/0	1/0	1/0	1/0	1/0	1/0	1/0	1/0	1/0	1/0	1/0	1/0	1/0	1/0	1/0	1/0	1/0	1/0	1/0
NC_037341.1:30222898-30223173(-)	BosSINEL	58.03	41.97	614	444	87	440	2	7	1/1	1/0	1/0	1/0	1/0	1/0	1/0	1/0	1/0	1/0	1/0	1/1	1/0	1/0	1/0	1/0	1/0	1/0	1/0	1/0	1/0	1/0	1/0	1/1	1/0	1/1	1/0	1/1	1/0	1/0	1/0	1/0	1/0	1/0	1/0	1/0	1/0	1/0	1/0	1/0
NC_037341.1:30907409-30907587(-)	BosSINEL	88.92	11.08	939	117	412	115	1	8	1/1	1/1	1/1	1/0	1/0	1/1	1/1	1/1	1/1	1/1	1/1	1/1	1/1	1/0	1/1	1/1	1/1	1/0	1/1	1/1	1/1	1/0	1/0	1/0	1/0	1/0	1/0	1/1	1/1	1/1	1/1	1/0	1/1	1/1	1/1	1/1	1/0	1/0	1/1	1/0
NC_037341.1:31779582-31779850(+)	BosSINEL	89.47	10.53	943	111	416	111	0	9	1/1	1/0	1/1	1/0	1/1	1/0	1/0	1/1	1/1	1/1	1/0	1/1	1/1	1/0	1/0	1/1	1/0	1/1	1/1	1/0	1/0	1/0	1/1	1/1	1/0	1/1	1/1	1/1	1/1	1/0	1/0	1/1	1/0	1/1	1/0	1/1	1/1	1/0	1/1	1/1
NC_037341.1:31844618-31844879(+)	BosSINEL	49.72	50.28	527	533	5	517	8	6	1/0	1/0	1/0	1/0	1/0	1/0	1/0	1/0	1/0	1/0	1/0	1/0	1/0	1/0	1/0	1/0	1/0	1/0	1/0	1/0	1/0	1/0	1/0	1/0	1/0	1/0	1/0	1/0	1/0	1/0	1/0	1/0	1/0	1/0	1/0	1/0	1/0	1/0	1/0	1/0
NC_037341.1:32526032-32526308(+)	BosSINEL	49.44	50.56	530	542	0	530	6	0	1/0	1/0	1/0	1/0	1/0	1/0	1/0	1/0	1/0	1/0	1/0	1/0	1/0	1/0	1/0	1/0	1/0	1/0	1/0	1/0	1/0	1/0	1/0	1/0	1/0	1/0	1/0	1/0	1/0	1/0	1/0	1/0	1/0	1/0	1/0	1/0	1/0	1/0	1/0	1/0
NC_037341.1:33106829-33107031(+)	BosSINEL	57.39	42.61	606	450	91	424	13	8	1/0	1/0	1/0	1/0	1/1	1/1	1/0	1/0	0/0	1/0	1/0	1/0	1/1	1/0	1/1	1/0	1/0	1/0	1/1	1/0	1/0	1/0	1/0	1/0	1/0	1/0	1/0	1/0	1/0	1/1	1/1	1/0	1/0	1/0	1/0	1/0	1/0	1/0	1/0	1/0
NC_037341.1:33687422-33687688(-)	BosSINEL	50.38	49.62	534	526	17	500	13	6	1/0	1/0	1/0	1/0	1/0	1/0	1/0	1/0	1/0	1/0	1/0	1/0	1/0	1/0	1/0	1/0	1/0	1/0	1/0	1/0	1/0	1/0	1/0	1/0	1/0	1/0	1/0	1/0	1/0	1/0	1/0	1/0	1/0	1/0	1/0	1/0	1/0	1/0	1/0	1/0
NC_037341.1:34504191-34504459(+)	BosSINEL	53.33	46.67	561	491	40	481	5	10	1/0	1/0	1/0	1/0	1/0	1/1	1/0	1/0	1/0	1/0	1/0	1/0	1/0	1/0	1/0	1/0	1/0	1/0	1/0	1/0	1/0	1/0	1/1	1/0	1/0	1/0	1/0	1/0	1/0	1/0	1/0	1/0	1/0	1/0	1/0	1/0	1/0	1/0	1/0	1/0
NC_037341.1:35030312-35030586(-)	BosSINEL	72.02	27.98	762	296	238	286	5	7	1/0	1/1	1/1	1/1	1/1	1/1	1/0	1/0	1/0	1/0	1/1	1/0	1/1	1/0	1/0	1/1	1/1	1/1	1/0	1/0	1/0	1/0	1/0	1/0	1/0	1/1	1/0	1/0	1/0	1/0	1/0	1/0	1/0	1/0	1/0	1/0	1/0	1/1	1/0	1/0
NC_037341.1:35998751-35999011(-)	BosSINEL	62.62	37.38	665	397	136	393	2	5	1/0	1/0	1/0	1/0	1/0	1/0	1/0	1/0	1/0	1/0	1/0	1/0	1/1	1/1	1/1	1/1	1/1	1/0	1/0	1/1	1/1	1/1	1/0	1/1	1/0	1/0	1/1	1/0	1/0	1/1	1/1	1/0	1/0	1/0	1/1	1/0	1/0	1/0	1/0	1/0
NC_037341.1:36246348-36246466(+)	BosSINEL	48.41	51.59	517	551	0	517	17	2	1/0	1/0	1/0	1/0	1/0	1/0	1/0	1/0	1/0	1/0	1/0	1/0	1/0	1/0	1/0	1/0	1/0	1/0	1/0	1/0	1/0	1/0	1/0	1/0	1/0	1/0	1/0	1/0	1/0	1/0	1/0	1/0	1/0	1/0	1/0	1/0	1/0	1/0	1/0	1/0
NC_037341.1:37175276-37175546(+)	BosSINEL	85.69	14.31	898	150	378	142	4	12	1/1	1/1	1/1	1/1	1/1	1/1	1/1	1/1	1/1	1/1	1/1	1/0	1/1	1/1	1/1	1/1	1/0	1/1	1/1	1/0	1/0	1/0	1/0	1/1	1/1	1/1	1/1	1/1	1/0	1/1	1/0	1/1	1/0	1/1	1/0	1/1	1/0	1/1	1/1	1/1
NC_037341.1:37603747-37603991(-)	BosSINEL	50.57	49.43	536	524	10	516	4	6	1/0	1/0	1/0	1/0	1/0	1/0	1/0	1/0	1/0	1/0	1/0	1/0	1/0	1/0	1/0	1/0	1/0	1/0	1/0	1/0	1/0	1/0	1/0	1/0	1/0	1/0	1/0	1/0	1/0	1/0	1/0	1/0	1/0	1/0	1/0	1/0	1/0	1/0	1/0	1/0
NC_037341.1:37955505-37955639(+)	BosSINEL	48.79	51.21	522	548	1	520	14	1	1/0	1/0	1/0	1/0	1/0	1/0	1/0	1/0	1/0	1/0	1/0	1/0	1/0	1/0	1/0	1/0	1/0	1/0	1/0	1/0	1/0	1/0	1/0	1/0	1/0	1/0	1/0	1/0	1/0	1/0	1/0	1/0	1/0	1/0	1/0	1/0	1/0	1/0	1/0	1/0
NC_037341.1:38068692-38068962(+)	BosSINEL	63.61	36.39	673	385	149	375	5	7	1/0	1/1	1/1	1/0	1/0	1/0	1/0	1/0	1/0	1/0	1/0	1/0	1/0	1/0	1/0	1/0	1/0	1/0	1/0	1/0	1/0	1/0	1/0	1/0	1/0	1/0	1/1	1/0	1/0	1/0	1/0	1/0	1/0	1/0	1/0	1/0	1/0	1/0	1/0	1/0
NC_037341.1:39000526-39000797(+)	BosSINEL	47.76	52.24	512	560	0	512	24	0	1/0	1/0	1/0	1/0	1/0	1/0	1/0	1/0	1/0	1/0	1/0	1/0	1/0	1/0	1/0	1/0	1/0	1/0	1/0	1/0	1/0	1/0	1/0	1/0	1/0	1/0	1/0	1/0	1/0	1/0	1/0	1/0	1/0	1/0	1/0	1/0	1/0	1/0	1/0	1/0
NC_037341.1:39912621-39912737(+)	BosSINEL	51.51	48.49	545	513	25	495	9	7	1/0	1/0	1/0	1/0	1/0	1/0	1/0	1/0	1/0	1/0	1/0	1/0	1/0	1/0	1/0	1/0	1/0	1/0	1/0	1/0	1/0	1/0	1/0	1/0	1/0	1/0	1/0	1/0	1/0	1/0	1/0	1/0	1/0	1/0	1/0	1/0	1/0	1/0	1/0	1/0
NC_037341.1:40571900-40572176(-)	BosSINEL	75.19	24.81	797	263	267	263	0	6	1/0	1/0	1/0	1/0	1/0	1/1	1/1	1/1	1/1	1/0	1/1	1/1	1/1	1/1	1/1	1/1	1/1	1/1	1/1	1/1	1/1	1/1	1/1	1/0	1/1	1/1	1/1	1/1	1/1	1/1	1/1	1/1	1/1	1/1	1/1	1/1	1/1	1/1	1/1	1/1
NC_037341.1:42153302-42153430(-)	BosSINEL	66.19	33.81	699	357	175	349	4	8	1/0	1/1	1/1	1/0	1/0	1/1	1/0	1/0	1/0	1/0	1/0	1/0	1/0	1/0	1/0	1/0	1/0	1/0	1/0	1/1	1/0	1/0	1/0	1/0	1/0	1/0	1/0	1/0	1/0	1/0	1/0	1/0	1/0	1/0	1/0	1/0	1/0	1/0	1/0	1/0
NC_037341.1:43811271-43811406(-)	BosSINEL	55.51	44.49	584	468	61	462	3	10	1/0	1/0	1/0	1/0	1/0	1/0	1/0	1/0	1/0	1/0	1/0	1/0	1/0	1/0	1/0	1/0	1/0	1/0	1/0	1/0	1/0	1/0	1/0	1/0	1/0	1/0	1/0	1/1	1/0	1/0	1/0	1/0	1/0	1/0	1/0	1/0	1/0	1/0	1/0	1/0
NC_037341.1:43989964-43990207(+)	BosSINEL	53.77	46.23	570	490	47	476	7	6	1/0	1/0	1/0	1/0	1/0	1/0	1/0	1/0	1/0	1/0	1/0	1/0	1/0	1/0	1/0	1/0	1/0	1/0	1/0	1/0	1/0	1/0	1/0	1/0	1/0	1/0	1/0	1/0	1/0	1/0	1/0	1/0	1/0	1/0	1/0	1/0	1/0	1/0	1/0	1/0
NC_037341.1:43996651-43996789(-)	BosSINEL	55.75	44.25	591	469	67	457	6	6	1/0	1/0	1/0	1/0	1/0	1/0	1/0	1/0	1/0	1/0	1/0	1/0	1/0	1/0	1/1	1/0	1/0	1/0	1/0	1/0	1/0	1/0	1/0	1/0	1/0	1/0	1/1	1/0	1/0	1/0	1/0	1/0	1/0	1/0	1/0	1/0	1/0	1/0	1/0	1/1
NC_037341.1:44334257-44334525(-)	BosSINEL	49.25	50.75	522	538	4	514	12	6	1/0	1/0	1/0	1/0	1/0	1/0	1/0	1/0	1/0	1/0	1/0	1/0	1/0	1/0	1/0	1/0	1/0	1/0	1/0	1/0	1/0	1/0	1/0	1/0	1/0	1/0	1/0	1/0	1/0	1/0	1/0	1/0	1/0	1/0	1/0	1/0	1/0	1/0	1/0	1/0
NC_037341.1:44626015-44626290(-)	BosSINEL	77.32	22.68	815	239	293	229	5	9	1/1	1/0	1/1	1/0	1/1	1/0	1/0	1/0	1/1	1/1	1/0	1/0	1/1	1/1	1/0	1/0	1/0	1/0	1/1	1/0	1/0	1/1	1/0	1/1	1/0	1/0	1/0	1/0	1/0	1/1	1/0	1/0	1/0	1/0	1/1	1/1	1/0	1/1	1/0	1/0
NC_037341.1:44912720-44912995(-)	BosSINEL	59.83	40.17	633	425	114	405	10	7	1/0	1/0	1/0	1/0	1/0	1/0	1/0	1/1	1/1	1/0	1/0	1/0	1/0	1/0	1/1	1/0	1/0	1/1	1/0	1/1	1/0	1/1	1/0	1/0	1/0	1/0	1/0	1/0	1/0	1/1	1/0	1/1	1/0	1/0	1/0	1/0	1/0	1/0	1/0	1/0
NC_037341.1:45060975-45061250(+)	BosSINEL	55.95	44.05	592	466	66	460	3	7	1/0	1/0	1/0	1/0	1/0	1/0	1/0	1/0	1/0	1/0	1/0	1/1	1/0	1/0	1/0	1/0	1/0	1/0	1/1	1/0	1/0	1/0	1/0	1/0	1/0	1/0	1/0	1/0	1/0	1/0	1/0	1/0	1/0	1/0	1/0	1/0	1/0	1/0	1/0	1/0
NC_037341.1:45136249-45136522(+)	BosSINEL	86.57	13.43	909	141	385	139	1	11	1/1	1/1	1/1	1/1	1/1	1/1	1/0	1/1	1/1	1/0	1/0	1/0	1/1	1/0	1/1	1/0	1/1	1/1	1/1	1/1	1/1	1/1	1/1	1/0	1/0	1/0	1/1	1/1	1/1	1/0	1/1	1/1	1/0	1/0	1/0	1/1	1/0	1/1	1/0	1/1
NC_037341.1:45567937-45568208(+)	BosSINEL	57.47	42.53	608	450	85	438	6	7	1/0	1/0	1/1	1/0	1/0	1/0	1/0	1/0	1/0	1/0	1/0	1/1	1/0	1/0	1/0	1/0	1/0	1/0	1/0	1/0	1/0	1/0	1/0	1/0	1/0	1/0	1/0	1/0	1/0	1/0	1/0	1/0	1/0	1/0	1/0	1/0	1/0	1/0	1/0	1/0
NC_037341.1:45986531-45986805(-)	BosSINEL	89.18	10.82	931	113	409	113	0	14	1/1	1/1	1/1	1/1	1/1	1/1	1/0	1/1	1/1	1/1	1/1	1/0	1/1	1/1	1/1	1/1	1/1	1/1	1/1	1/1	1/0	1/0	1/1	1/1	1/1	1/1	1/1	1/1	1/1	1/1	1/0	1/0	1/0	1/1	1/1	1/1	1/0	1/1	1/0	1/0
NC_037341.1:46456946-46457221(+)	BosSINEL	63.38	36.62	668	386	142	384	1	9	1/0	1/0	1/0	1/0	1/0	1/0	1/1	1/0	1/0	1/1	1/0	1/0	1/1	1/0	1/0	1/0	1/0	1/1	1/0	1/1	1/1	1/1	1/0	1/0	1/0	1/0	1/0	1/0	1/0	1/0	1/1	1/0	1/0	1/0	1/0	1/0	1/0	1/0	1/0	1/0
NC_037341.1:46915336-46915612(-)	BosSINEL	48.78	51.22	521	547	0	521	13	2	1/0	1/0	1/0	1/0	1/0	1/0	1/0	1/0	1/0	1/0	1/0	1/0	1/0	1/0	1/0	1/0	1/0	1/0	1/0	1/0	1/0	1/0	1/0	1/0	1/0	1/0	1/0	1/0	1/0	1/0	1/0	1/0	1/0	1/0	1/0	1/0	1/0	1/0	1/0	1/0
NC_037341.1:48046978-48047259(-)	BosSINEL	62.64	37.36	659	393	135	389	2	10	1/0	1/0	1/0	1/0	1/0	1/1	1/1	1/0	1/0	1/1	1/0	1/0	1/1	1/0	1/0	1/0	1/0	1/0	1/0	1/0	1/0	1/1	1/0	1/0	1/1	1/0	1/0	1/0	1/0	1/0	1/0	1/0	1/1	1/0	1/0	1/1	1/0	1/0	1/0	1/0
NC_037341.1:51058045-51058315(-)	BosSINEL	50.94	49.06	543	523	16	511	6	3	1/0	1/0	1/0	1/0	1/0	1/0	1/0	1/0	1/0	1/0	1/1	1/0	1/0	1/0	1/0	1/0	1/0	1/0	1/0	1/0	1/0	1/0	1/0	1/0	1/0	1/0	1/0	1/0	1/1	1/0	1/0	1/0	1/0	1/0	1/0	1/0	1/0	1/0	1/0	1/0
NC_037341.1:51998821-51999095(-)	BosSINEL	58.38	41.62	613	437	95	423	7	11	1/0	1/0	1/0	1/1	1/1	1/0	1/0	1/0	1/0	1/0	1/0	1/0	1/0	1/0	1/1	1/0	1/0	1/0	1/0	1/1	1/0	1/1	1/0	1/0	1/0	1/0	1/0	1/0	1/0	1/0	1/0	1/0	1/0	1/0	1/0	1/0	1/0	1/0	1/0	1/0
NC_037341.1:52565295-52565413(-)	BosSINEL	50	50	530	530	3	524	3	6	1/0	1/0	1/0	1/0	1/0	1/0	1/0	1/0	1/0	1/0	1/0	1/0	1/0	1/0	1/0	1/0	1/0	1/0	1/0	1/0	1/0	1/0	1/0	1/0	1/0	1/0	1/0	1/0	1/0	1/0	1/0	1/0	1/0	1/0	1/0	1/0	1/0	1/0	1/0	1/0
NC_037341.1:52772356-52772638(+)	BosSINEL	48.37	51.63	504	538	129	246	146	15	1/0	1/0	1/0	1/1	1/1	1/1	1/0	1/0	1/0	1/0	1/0	1/0	0/0	0/0	0/0	1/0	0/0	0/0	1/1	1/0	0/0	1/0	0/0	0/0	1/0	0/0	1/0	0/0	1/0	1/0	1/1	1/0	1/1	0/0	1/0	0/0	0/0	1/0	1/1	1/0
NC_037341.1:52797667-52797864(-)	BosSINEL	49.53	50.47	525	535	0	525	5	6	1/0	1/0	1/0	1/0	1/0	1/0	1/0	1/0	1/0	1/0	1/0	1/0	1/0	1/0	1/0	1/0	1/0	1/0	1/0	1/0	1/0	1/0	1/0	1/0	1/0	1/0	1/0	1/0	1/0	1/0	1/0	1/0	1/0	1/0	1/0	1/0	1/0	1/0	1/0	1/0
NC_037341.1:53101500-53101775(-)	BosSINEL	49.53	50.47	524	534	0	524	5	7	1/0	1/0	1/0	1/0	1/0	1/0	1/0	1/0	1/0	1/0	1/0	1/0	1/0	1/0	1/0	1/0	1/0	1/0	1/0	1/0	1/0	1/0	1/0	1/0	1/0	1/0	1/0	1/0	1/0	1/0	1/0	1/0	1/0	1/0	1/0	1/0	1/0	1/0	1/0	1/0
NC_037341.1:53874458-53874734(-)	BosSINEL	80.29	19.71	843	207	322	199	4	11	1/0	1/1	1/0	1/1	1/1	1/0	1/1	1/1	1/0	1/1	1/1	1/1	1/1	1/0	1/0	1/1	1/1	1/0	1/1	1/1	1/0	1/1	1/1	1/0	1/0	1/0	1/0	1/1	1/0	1/0	1/0	1/1	1/1	1/0	1/1	1/0	1/1	1/0	1/1	1/1
NC_037341.1:53932624-53932876(-)	BosSINEL	49.72	50.28	531	537	5	521	8	2	1/0	1/0	1/0	1/0	1/0	1/0	1/0	1/0	1/0	1/0	1/0	1/0	1/0	1/0	1/0	1/0	1/0	1/0	1/0	1/0	1/0	1/0	1/0	1/0	1/0	1/0	1/0	1/0	1/0	1/0	1/0	1/0	1/0	1/0	1/0	1/0	1/0	1/0	1/0	1/0
NC_037341.1:54179850-54180126(+)	BosSINEL	56.36	43.64	594	460	74	446	7	9	1/0	1/0	1/0	1/0	1/1	1/0	1/0	1/0	1/1	1/0	1/0	1/0	1/0	1/0	1/1	1/0	1/0	1/0	1/0	1/0	1/0	1/0	1/0	1/0	1/0	1/0	1/0	1/0	1/0	1/0	1/0	1/0	1/0	1/0	1/0	1/0	1/0	1/0	1/0	1/0
NC_037341.1:54871583-54871858(+)	BosSINEL	50.56	49.44	541	529	9	523	3	1	1/0	1/0	1/0	1/0	1/0	1/0	1/0	1/0	1/0	1/0	1/0	0/0	1/0	1/0	1/0	1/0	1/0	1/0	1/0	1/0	1/0	1/0	1/0	1/0	1/0	1/0	1/0	1/0	1/0	1/0	1/0	1/0	1/0	1/0	1/0	1/0	1/1	1/0	1/0	1/0
NC_037341.1:55743974-55744249(+)	BosSINEL	70.13	29.87	742	316	213	316	0	7	1/1	1/1	1/1	1/1	1/0	1/0	1/0	1/0	1/1	1/1	1/0	1/0	1/1	1/0	1/0	1/0	1/0	1/0	1/0	1/0	1/0	1/0	1/0	1/0	1/0	1/0	1/0	1/0	1/0	1/0	1/0	1/0	1/0	1/0	1/0	1/0	1/0	1/0	1/0	1/0
NC_037341.1:56220736-56220864(+)	BosSINEL	49.62	50.38	528	536	1	526	5	4	1/0	1/0	1/0	1/0	1/0	1/0	1/0	1/0	1/0	1/0	1/0	1/0	1/0	1/0	1/0	1/0	1/0	1/0	1/0	1/0	1/0	1/0	1/0	1/0	1/0	1/0	1/0	1/0	1/0	1/0	1/0	1/0	1/0	1/0	1/0	1/0	1/0	1/0	1/0	1/0
NC_037341.1:56633130-56633193(-)	BosSINEL	49.15	50.85	523	541	1	521	10	4	1/0	1/0	1/0	1/0	1/0	1/0	1/0	1/0	1/0	1/0	1/0	1/0	1/0	1/0	1/0	1/0	1/0	1/0	1/0	1/0	1/0	1/0	1/0	1/0	1/0	1/0	1/0	1/0	1/0	1/0	1/0	1/0	1/0	1/0	1/0	1/0	1/0	1/0	1/0	1/0
NC_037341.1:57119767-57119907(+)	BosSINEL	75.77	24.23	791	253	274	243	5	14	1/1	1/1	1/0	1/0	1/1	1/1	1/1	1/1	1/1	1/1	1/0	1/1	1/0	1/0	1/0	1/0	1/1	1/0	1/1	1/1	1/1	1/1	1/1	1/0	1/1	1/0	1/1	1/1	1/0	1/1	1/1	1/0	1/0	1/1	1/1	1/1	1/0	1/0	1/0	1/1
NC_037341.1:59462134-59462405(+)	BosSINEL	65.53	34.47	692	364	164	364	0	8	1/0	1/0	1/1	1/0	1/1	1/0	1/0	1/0	1/0	1/0	1/1	1/1	1/0	1/0	1/0	1/1	1/0	1/0	1/1	1/0	1/0	1/0	1/0	1/0	1/1	1/0	1/0	1/1	1/0	1/0	1/0	1/0	1/0	1/0	1/0	1/0	1/0	1/1	1/0	1/1
NC_037341.1:61113003-61113275(+)	BosSINEL	49.53	50.47	524	534	0	524	5	7	1/0	1/0	1/0	1/0	1/0	1/0	1/0	1/0	1/0	1/0	1/0	1/0	1/0	1/0	1/0	1/0	1/0	1/0	1/0	1/0	1/0	1/0	1/0	1/0	1/0	1/0	1/0	1/0	1/0	1/0	1/0	1/0	1/0	1/0	1/0	1/0	1/0	1/0	1/0	1/0
NC_037341.1:61954208-61954475(+)	BosSINEL	51.32	48.68	546	518	24	498	10	4	1/0	1/0	1/0	1/0	1/0	1/0	1/0	1/0	1/0	1/0	1/0	1/0	1/0	1/0	1/0	1/0	1/0	1/0	1/0	1/0	1/0	1/0	1/0	1/0	1/0	1/0	1/0	1/0	1/0	1/0	1/0	1/0	1/0	1/0	1/0	1/0	1/0	1/0	1/0	1/0
NC_037341.1:62477484-62477759(-)	BosSINEL	53.11	46.89	563	497	42	479	9	6	1/0	1/0	1/0	1/0	1/0	1/0	1/0	1/0	1/0	1/0	1/0	1/0	1/0	1/0	1/0	1/0	1/0	1/0	1/0	1/0	1/0	1/0	1/0	1/0	1/0	1/0	1/0	1/0	1/0	1/0	1/0	1/0	1/0	1/0	1/0	1/0	1/0	1/0	1/0	1/0
NC_037341.1:62913408-62913460(-)	BosSINEL	72.5	27.5	767	291	238	291	0	7	1/1	1/1	1/1	1/1	1/1	1/1	1/0	1/0	1/1	1/0	1/0	1/0	1/0	1/1	1/0	1/1	1/1	1/0	1/0	1/1	1/0	1/0	1/1	1/0	1/1	1/0	1/0	1/1	1/0	1/0	1/0	1/1	1/0	1/0	1/0	1/0	1/0	1/1	1/0	1/0
NC_037341.1:63229412-63229684(-)	BosSINEL	51.42	48.58	544	514	21	502	6	7	1/0	1/0	1/0	1/0	1/0	1/0	1/0	1/0	1/0	1/0	1/0	1/0	1/0	1/0	1/0	1/0	1/0	1/0	1/0	1/0	1/0	1/0	1/0	1/0	1/0	1/0	1/0	1/0	1/0	1/0	1/0	1/0	1/0	1/0	1/0	1/0	1/0	1/0	1/0	1/0
NC_037341.1:63737329-63737605(-)	BosSINEL	53.58	46.42	568	492	43	482	5	6	1/0	1/0	1/0	1/0	1/0	1/0	1/0	1/0	1/0	1/0	1/0	1/0	1/0	1/0	1/0	1/0	1/0	1/0	1/0	1/0	1/0	1/0	1/0	1/0	1/0	1/0	1/0	1/0	1/0	1/0	1/0	1/0	1/0	1/0	1/0	1/0	1/0	1/0	1/0	1/0
NC_037341.1:64264428-64264701(-)	BosSINEL	87.28	12.72	913	133	391	131	1	13	1/1	1/1	1/0	1/0	1/1	1/1	1/1	1/1	1/1	1/0	1/1	1/1	1/1	1/1	1/1	1/1	1/1	1/1	1/1	1/1	1/1	1/1	1/1	1/1	1/1	1/1	1/1	1/1	1/1	1/0	1/1	1/0	1/1	1/1	1/1	1/0	1/1	1/1	1/0	1/1
NC_037341.1:64374286-64374321(+)	BosSINEL	50.85	49.15	539	521	11	517	2	6	1/0	1/0	1/0	1/0	1/0	1/0	1/0	1/0	1/0	1/0	1/0	1/0	1/0	1/0	1/0	1/0	1/0	1/0	1/0	1/0	1/0	1/0	1/0	1/0	1/0	1/0	1/0	1/0	1/0	1/0	1/0	1/0	1/0	1/0	1/0	1/0	1/0	1/0	1/0	1/0
NC_037341.1:64430520-64430652(-)	BosSINEL	50.95	49.05	537	517	16	505	6	9	1/0	1/0	1/0	1/0	1/0	1/0	1/0	1/0	1/0	1/0	1/0	1/0	1/0	1/0	1/0	1/0	1/0	1/0	1/0	1/0	1/0	1/0	1/0	1/0	1/0	1/0	1/0	1/0	1/0	1/0	1/0	1/0	1/0	1/0	1/0	1/0	1/0	1/0	1/0	1/0
NC_037341.1:66085630-66085761(-)	BosSINEL	59.9	40.1	629	421	109	411	5	11	1/0	1/0	1/0	1/0	1/0	1/0	1/1	1/0	1/0	1/0	1/0	1/1	1/0	1/0	1/1	1/0	1/0	1/0	1/1	1/0	1/0	1/0	1/0	1/0	1/0	1/0	1/0	1/0	1/1	1/1	1/0	1/0	1/1	1/0	1/0	1/0	1/1	1/0	1/0	1/0
NC_037341.1:66468454-66468729(-)	BosSINEL	48.78	51.22	520	546	0	520	13	3	1/0	1/0	1/0	1/0	1/0	1/0	1/0	1/0	1/0	1/0	1/0	1/0	1/0	1/0	1/0	1/0	1/0	1/0	1/0	1/0	1/0	1/0	1/0	1/0	1/0	1/0	1/0	1/0	1/0	1/0	1/0	1/0	1/0	1/0	1/0	1/0	1/0	1/0	1/0	1/0
NC_037341.1:66470464-66470740(+)	BosSINEL	48.41	51.59	517	551	0	517	17	2	1/0	1/0	1/0	1/0	1/0	1/0	1/0	1/0	1/0	1/0	1/0	1/0	1/0	1/0	1/0	1/0	1/0	1/0	1/0	1/0	1/0	1/0	1/0	1/0	1/0	1/0	1/0	1/0	1/0	1/0	1/0	1/0	1/0	1/0	1/0	1/0	1/0	1/0	1/0	1/0
NC_037341.1:66486724-66486873(+)	BosSINEL	88.21	11.79	905	121	400	105	8	23	1/1	1/1	1/1	1/1	1/1	1/0	1/1	1/0	1/0	1/1	1/1	1/0	1/1	1/1	1/0	1/0	1/0	1/0	1/1	1/0	1/1	1/0	1/0	1/1	1/1	1/0	1/1	1/1	1/0	1/1	1/1	1/0	1/0	1/1	1/0	1/0	1/1	1/0	1/1	1/0
NC_037341.1:66571739-66571846(+)	BosSINEL	51.89	48.11	548	508	26	496	6	8	1/0	1/0	1/0	1/0	1/0	1/0	1/0	1/0	1/0	1/0	1/0	1/0	1/0	1/0	1/0	1/0	1/0	1/0	1/0	1/0	1/0	1/0	1/0	1/0	1/0	1/0	1/0	1/0	1/0	1/0	1/0	1/0	1/0	1/0	1/0	1/0	1/0	1/0	1/0	1/0
NC_037341.1:66592138-66592413(+)	BosSINEL	50.28	49.72	530	524	13	504	10	9	1/0	1/0	1/0	1/0	1/0	1/0	1/0	1/0	1/0	1/0	1/0	1/0	1/0	1/0	1/0	1/0	1/0	1/0	1/0	1/0	1/0	1/0	1/0	1/0	1/0	1/0	1/0	1/0	1/0	1/0	1/0	1/0	1/0	1/0	1/0	1/0	1/0	1/0	1/0	1/0
NC_037341.1:67228397-67228651(+)	BosSINEL	65.28	34.72	692	368	164	364	2	6	1/0	1/0	1/0	1/1	1/0	1/0	1/0	1/0	1/0	1/0	1/0	1/0	1/0	1/0	1/0	1/0	1/1	1/0	1/0	1/1	1/0	1/0	1/0	1/1	1/0	1/0	1/0	1/0	1/0	1/0	1/1	1/0	1/0	1/0	1/0	1/0	1/1	1/0	1/1	1/0
NC_037341.1:69001134-69001188(-)	BosSINEL	49.06	50.94	520	540	0	520	10	6	1/0	1/0	1/0	1/0	1/0	1/0	1/0	1/0	1/0	1/0	1/0	1/0	1/0	1/0	1/0	1/0	1/0	1/0	1/0	1/0	1/0	1/0	1/0	1/0	1/0	1/0	1/0	1/0	1/0	1/0	1/0	1/0	1/0	1/0	1/0	1/0	1/0	1/0	1/0	1/0
NC_037341.1:69856886-69857040(-)	BosSINEL	59.81	40.19	634	426	108	418	4	6	1/0	1/0	1/0	1/0	1/0	1/1	1/0	1/0	1/0	1/0	1/1	1/0	1/0	1/0	1/0	1/0	1/0	1/0	1/0	1/1	1/0	1/0	1/0	1/0	1/0	1/0	1/0	1/1	1/0	1/1	1/0	1/0	1/0	1/0	1/0	1/0	1/0	1/1	1/0	1/1
NC_037341.1:70297477-70297755(-)	BosSINEL	48.51	51.49	520	552	0	520	16	0	1/0	1/0	1/0	1/0	1/0	1/0	1/0	1/0	1/0	1/0	1/0	1/0	1/0	1/0	1/0	1/0	1/0	1/0	1/0	1/0	1/0	1/0	1/0	1/0	1/0	1/0	1/0	1/0	1/0	1/0	1/0	1/0	1/0	1/0	1/0	1/0	1/0	1/0	1/0	1/0
NC_037341.1:70618931-70619201(-)	BosSINEL	49.72	50.28	527	533	0	527	3	6	1/0	1/0	1/0	1/0	1/0	1/0	1/0	1/0	1/0	1/0	1/0	1/0	1/0	1/0	1/0	1/0	1/0	1/0	1/0	1/0	1/0	1/0	1/0	1/0	1/0	1/0	1/0	1/0	1/0	1/0	1/0	1/0	1/0	1/0	1/0	1/0	1/0	1/0	1/0	1/0
NC_037341.1:70708016-70708285(-)	BosSINEL	53.12	46.88	561	495	51	459	18	8	1/0	1/0	1/0	1/0	1/1	1/0	1/0	1/1	1/0	1/0	1/0	1/0	1/0	1/0	1/1	1/0	1/0	1/0	1/0	1/0	1/0	1/0	1/0	1/0	1/0	1/0	1/0	1/0	1/0	1/0	1/0	1/0	1/0	1/0	1/0	1/1	1/0	1/0	1/1	1/0
NC_037341.1:71000795-71001071(+)	BosSINEL	50.19	49.81	528	524	13	502	11	10	1/0	1/0	1/0	1/0	1/0	1/1	1/0	1/0	1/0	1/0	1/0	1/0	1/0	1/0	1/0	1/0	1/0	1/0	1/0	1/0	1/0	1/0	1/0	1/0	1/0	1/0	1/0	1/0	1/0	1/0	1/0	1/0	1/0	1/0	1/0	1/0	1/0	1/0	1/0	1/0
NC_037341.1:71502339-71502619(+)	BosSINEL	54.72	45.28	580	480	50	480	0	6	1/0	1/0	1/0	1/0	1/0	1/0	1/0	1/0	1/0	1/0	1/0	1/1	1/0	1/0	1/0	1/0	1/0	1/0	1/1	1/0	1/0	1/0	1/0	1/0	1/0	1/0	1/0	1/0	1/0	1/0	1/0	1/0	1/0	1/0	1/0	1/0	1/0	1/0	1/0	1/0
NC_037341.1:72233912-72234022(-)	BosSINEL	49.16	50.84	525	543	0	525	9	2	1/0	1/0	1/0	1/0	1/0	1/0	1/0	1/0	1/0	1/0	1/0	1/0	1/0	1/0	1/0	1/0	1/0	1/0	1/0	1/0	1/0	1/0	1/0	1/0	1/0	1/0	1/0	1/0	1/0	1/0	1/0	1/0	1/0	1/0	1/0	1/0	1/0	1/0	1/0	1/0
NC_037341.1:72613581-72613684(+)	BosSINEL	48.97	51.03	525	547	0	525	11	0	1/0	1/0	1/0	1/0	1/0	1/0	1/0	1/0	1/0	1/0	1/0	1/0	1/0	1/0	1/0	1/0	1/0	1/0	1/0	1/0	1/0	1/0	1/0	1/0	1/0	1/0	1/0	1/0	1/0	1/0	1/0	1/0	1/0	1/0	1/0	1/0	1/0	1/0	1/0	1/0
NC_037341.1:72789550-72789819(-)	BosSINEL	49.81	50.19	528	532	1	526	3	6	1/0	1/0	1/0	1/0	1/0	1/0	1/0	1/0	1/0	1/0	1/0	1/0	1/0	1/0	1/0	1/0	1/0	1/0	1/0	1/0	1/0	1/0	1/0	1/0	1/0	1/0	1/0	1/0	1/0	1/0	1/0	1/0	1/0	1/0	1/0	1/0	1/0	1/0	1/0	1/0
NC_037341.1:72841092-72841353(-)	BosSINEL	49.15	50.85	521	539	1	519	10	6	1/0	1/0	1/0	1/0	1/0	1/0	1/0	1/0	1/0	1/0	1/0	1/0	1/0	1/0	1/0	1/0	1/0	1/0	1/0	1/0	1/0	1/0	1/0	1/0	1/0	1/0	1/0	1/0	1/0	1/0	1/0	1/0	1/0	1/0	1/0	1/0	1/0	1/0	1/0	1/0
NC_037341.1:73066117-73066390(-)	BosSINEL	69.96	30.04	715	307	213	289	9	25	1/0	1/0	1/0	1/0	1/1	1/0	1/0	1/0	1/1	1/1	1/0	1/1	1/1	1/1	1/0	1/0	1/0	1/1	1/0	1/0	1/0	1/1	1/1	1/1	1/0	1/0	1/0	1/0	1/1	1/0	1/1	1/1	1/0	1/1	1/1	1/1	1/1	1/0	1/0	1/1
NC_037341.1:73358874-73359150(-)	BosSINEL	88.88	11.12	935	117	409	117	0	10	1/1	1/1	1/1	1/1	1/0	1/1	1/1	1/1	1/0	1/1	1/1	1/0	1/1	1/0	1/1	1/0	1/1	1/1	1/0	1/0	1/0	1/1	1/0	1/1	1/0	1/1	1/1	1/1	1/0	1/1	1/0	1/0	1/1	1/0	1/0	1/0	1/0	1/0	1/1	1/1
NC_037341.1:74740498-74740766(+)	BosSINEL	61.58	38.42	654	408	128	398	5	5	1/0	1/0	1/0	1/0	1/0	1/1	1/1	1/1	1/1	1/1	1/1	1/0	1/1	1/0	1/1	1/1	1/1	1/1	1/1	1/0	1/1	1/0	1/1	1/0	1/0	1/1	1/1	1/1	1/1	1/1	1/1	1/0	1/0	1/0	1/0	1/0	1/0	1/0	1/0	1/0
NC_037341.1:74905547-74905667(-)	BosSINEL	49.53	50.47	529	539	1	527	6	2	1/0	1/0	1/0	1/0	1/0	1/0	1/0	1/0	1/0	1/0	1/0	1/0	1/0	1/0	1/0	1/0	1/0	1/0	1/0	1/0	1/0	1/0	1/0	1/0	1/0	1/0	1/0	1/0	1/0	1/0	1/0	1/0	1/0	1/0	1/0	1/0	1/0	1/0	1/0	1/0
NC_037341.1:74908638-74908914(-)	BosSINEL	77.94	22.06	823	233	295	233	0	8	1/0	1/0	1/1	1/0	1/1	1/0	1/1	1/1	1/1	1/1	1/0	1/0	1/1	1/1	1/1	1/1	1/1	1/0	1/1	1/0	1/0	1/1	1/1	1/1	1/1	1/1	1/0	1/1	1/0	1/1	1/0	1/1	1/1	1/1	1/1	1/0	1/1	1/1	1/1	1/0
NC_037341.1:76253949-76254225(+)	BosSINEL	51.42	48.58	542	512	19	504	4	9	1/0	1/0	1/0	1/0	1/0	1/0	1/0	1/0	1/0	1/0	1/0	1/0	1/0	1/0	1/0	1/0	1/0	1/0	1/0	1/0	1/0	1/0	1/0	1/0	1/0	1/0	1/0	1/0	1/0	1/0	1/0	1/0	1/0	1/0	1/0	1/0	1/0	1/0	1/0	1/0
NC_037341.1:76293878-76294010(+)	BosSINEL	80.94	19.06	845	199	324	197	1	14	1/1	1/0	1/0	1/0	1/0	1/1	1/0	1/0	1/1	1/0	1/0	1/0	1/1	1/1	1/1	1/1	1/0	1/1	1/0	1/1	1/1	1/1	1/0	1/0	1/1	1/1	1/0	1/0	1/1	1/1	1/0	1/0	1/1	1/0	1/0	1/1	1/1	1/1	1/0	1/0
NC_037341.1:77135767-77136041(+)	BosSINEL	50.19	49.81	532	528	3	526	1	6	1/0	1/0	1/0	1/0	1/0	1/0	1/0	1/0	1/0	1/0	1/0	1/0	1/0	1/0	1/0	1/0	1/0	1/0	1/0	1/0	1/0	1/0	1/0	1/0	1/0	1/0	1/0	1/0	1/0	1/0	1/0	1/0	1/0	1/0	1/0	1/0	1/0	1/0	1/0	1/0
NC_037341.1:77152066-77152329(-)	BosSINEL	49.72	50.28	527	533	1	525	4	6	1/0	1/0	1/0	1/0	1/0	1/0	1/0	1/0	1/0	1/0	1/0	1/0	1/0	1/0	1/0	1/0	1/0	1/0	1/0	1/0	1/0	1/0	1/0	1/0	1/0	1/0	1/0	1/0	1/0	1/0	1/0	1/0	1/0	1/0	1/0	1/0	1/0	1/0	1/0	1/0
NC_037341.1:77167007-77167125(-)	BosSINEL	58.86	41.14	618	432	93	432	0	11	1/0	1/0	1/0	1/0	1/1	1/1	1/0	1/0	1/1	1/0	1/0	1/0	1/0	1/0	1/0	1/0	1/0	1/0	1/1	1/0	1/0	1/0	1/0	1/0	1/0	1/0	1/0	1/1	1/1	1/0	1/0	1/0	1/0	1/0	1/1	1/0	1/0	1/0	1/0	1/0
NC_037341.1:77191550-77191809(+)	BosSINEL	50	50	530	530	2	526	2	6	1/0	1/0	1/0	1/0	1/0	1/0	1/0	1/0	1/0	1/0	1/0	1/0	1/0	1/0	1/0	1/0	1/0	1/0	1/0	1/0	1/0	1/0	1/0	1/0	1/0	1/0	1/0	1/0	1/0	1/0	1/0	1/0	1/0	1/0	1/0	1/0	1/0	1/0	1/0	1/0
NC_037341.1:78029460-78029580(-)	BosSINEL	52.74	47.26	559	501	33	493	4	6	1/0	1/0	1/0	1/0	1/0	1/0	1/0	1/0	1/0	1/0	1/0	1/0	1/0	1/0	1/0	1/0	1/0	1/0	1/0	1/0	1/0	1/0	1/0	1/0	1/0	1/0	1/0	1/0	1/0	1/0	1/0	1/0	1/0	1/0	1/0	1/0	1/0	1/0	1/0	1/0
NC_037341.1:78051698-78051967(-)	BosSINEL	63.02	36.98	663	389	143	377	6	10	1/1	1/0	1/1	1/0	1/0	1/0	1/1	1/0	1/0	1/0	1/0	1/1	1/0	1/0	1/0	1/0	1/0	1/0	1/0	1/0	1/0	1/0	1/0	1/0	1/0	1/0	1/0	1/0	1/0	1/0	1/0	1/0	1/0	1/0	1/1	1/0	1/0	1/0	1/0	1/1
NC_037341.1:78171739-78172011(-)	BosSINEL	81.38	18.62	835	191	325	185	3	23	1/1	1/0	1/1	1/1	1/0	1/0	1/0	1/1	1/1	1/1	1/0	1/1	1/1	1/0	1/0	1/1	1/1	1/0	1/1	1/0	1/1	1/1	1/0	1/0	1/1	1/0	1/1	1/0	1/0	1/1	1/0	1/0	1/0	1/0	1/0	1/0	1/1	1/0	1/0	1/1
NC_037341.1:79209092-79209367(-)	BosSINEL	78.1	21.9	820	230	296	228	1	11	1/0	1/1	1/0	1/0	1/1	1/1	1/1	1/0	1/1	1/1	1/1	1/0	1/1	1/1	1/1	1/1	1/1	1/1	1/1	1/0	1/1	1/1	1/1	1/1	1/1	1/0	1/1	1/1	1/0	1/0	1/1	1/0	1/1	1/0	1/1	1/0	1/0	1/0	1/1	1/1
NC_037341.1:79348895-79348926(-)	BosSINEL	56.73	43.27	590	450	70	450	0	16	1/0	1/0	1/0	1/0	1/0	1/0	1/0	1/0	1/0	1/0	1/0	1/0	1/0	1/0	1/0	1/0	1/0	1/0	1/0	1/0	1/0	1/0	1/0	1/0	1/0	1/0	1/0	1/0	1/0	1/0	1/0	1/0	1/0	1/0	1/0	1/0	1/0	1/0	1/0	1/0
NC_037341.1:79813235-79813454(+)	BosSINEL	50	50	530	530	6	518	6	6	1/0	1/0	1/0	1/0	1/0	1/0	1/0	1/0	1/0	1/0	1/0	1/0	1/0	1/0	1/0	1/0	1/0	1/0	1/0	1/0	1/0	1/0	1/0	1/0	1/0	1/0	1/0	1/0	1/0	1/0	1/0	1/0	1/0	1/0	1/0	1/0	1/0	1/0	1/0	1/0
NC_037341.1:80411210-80411486(+)	BosSINEL	51.69	48.31	550	514	30	490	12	4	1/0	1/0	1/0	1/0	1/0	1/0	1/0	1/0	1/0	1/0	1/0	1/0	1/0	1/0	1/0	1/0	1/0	1/0	1/0	1/0	1/0	1/0	1/0	1/0	1/0	1/0	1/0	1/0	1/0	1/0	1/0	1/0	1/0	1/0	1/0	1/0	1/0	1/0	1/0	1/0
NC_037341.1:80494224-80494499(+)	BosSINEL	67.93	32.07	716	338	190	336	1	9	1/1	1/1	1/1	1/1	1/0	1/0	1/0	1/0	1/0	1/0	1/0	1/0	1/0	1/0	1/0	1/0	1/0	1/1	1/0	1/0	1/1	1/0	1/0	1/0	1/0	1/0	1/0	1/0	1/1	1/0	1/0	1/0	1/0	1/0	1/0	1/0	1/1	1/0	1/0	1/0
NC_037341.1:81545906-81546182(-)	BosSINEL	53.04	46.96	559	495	57	445	25	9	1/0	1/0	1/0	1/0	1/0	1/0	1/0	1/1	1/0	1/0	1/0	1/0	1/0	1/0	1/0	1/0	1/0	1/0	1/0	1/0	1/0	1/0	1/0	1/0	1/0	1/0	1/0	1/0	1/0	1/0	1/0	1/0	1/0	1/0	1/0	1/0	1/0	1/0	1/0	1/0
NC_037341.1:82148525-82148792(+)	BosSINEL	48.87	51.13	521	545	1	519	13	3	1/0	1/0	1/0	1/0	1/0	1/0	1/0	1/0	1/0	1/0	1/0	1/0	1/0	1/0	1/0	1/0	1/0	1/0	1/0	1/0	1/0	1/0	1/0	1/0	1/0	1/0	1/0	1/0	1/0	1/0	1/0	1/0	1/0	1/0	1/0	1/0	1/0	1/0	1/0	1/0
NW_020191713.1:100019-100152(-)	BosSINEL	76.5	23.5	791	243	277	237	3	19	1/1	1/1	1/1	1/0	1/1	1/1	1/0	1/1	1/1	1/1	1/0	1/1	1/1	1/1	1/0	1/1	1/1	1/1	1/0	1/1	1/0	1/1	1/0	1/1	1/0	1/0	1/0	1/1	1/1	1/1	1/0	1/1	1/0	1/1	1/1	1/1	1/1	1/0	1/1	1/0
NC_037342.1:177541-177817(+)	BosSINEL	48.87	51.13	518	542	0	518	12	6	1/0	1/0	1/0	1/0	1/0	1/0	1/0	1/0	1/0	1/0	1/0	1/0	1/0	1/0	1/0	1/0	1/0	1/0	1/0	1/0	1/0	1/0	1/0	1/0	0/0	1/0	1/0	1/0	1/0	1/0	1/0	1/0	1/0	1/0	1/0	1/0	1/0	1/0	1/0	1/0
NC_037342.1:233159-233296(+)	BosSINEL	49.72	50.28	526	532	8	510	11	7	1/0	1/0	1/0	1/0	1/0	1/0	1/0	1/0	1/0	1/0	1/0	1/0	1/0	1/0	1/0	1/0	1/0	1/0	1/0	1/0	1/0	1/0	1/0	1/0	1/0	1/0	1/0	1/0	1/0	1/0	1/0	1/0	1/0	1/0	1/0	1/0	1/0	1/0	1/0	1/0
NC_037342.1:777801-777936(-)	BosSINEL	81.19	18.81	846	196	329	188	4	15	1/0	1/1	1/1	1/0	1/1	1/1	1/1	1/1	1/1	1/1	1/1	1/1	1/1	1/0	1/0	1/0	1/0	1/1	1/0	1/1	1/1	1/1	1/0	1/0	1/0	1/1	1/1	1/1	1/1	1/0	1/1	1/1	1/1	1/0	1/0	1/0	1/0	1/1	1/1	1/0
NC_037342.1:805870-806141(+)	BosSINEL	49.81	50.19	528	532	2	524	4	6	1/0	1/0	1/0	1/0	1/0	1/0	1/0	1/0	1/0	1/0	1/0	1/0	1/0	1/0	1/0	1/0	1/0	1/0	1/0	1/0	1/0	1/0	1/0	1/0	1/0	1/0	1/0	1/0	1/0	1/0	1/0	1/0	1/0	1/0	1/0	1/0	1/0	1/0	1/0	1/0
NC_037342.1:976016-976149(+)	BosSINEL	66.19	33.81	695	355	174	347	4	11	1/0	1/0	1/0	1/0	1/1	1/0	1/0	1/0	1/0	1/0	1/0	1/1	1/0	1/0	1/0	1/0	1/0	1/1	1/1	1/1	1/0	1/0	1/1	1/1	1/1	1/0	1/0	1/1	1/0	1/0	1/1	1/0	1/0	1/0	1/0	1/0	1/1	1/0	1/0	1/0
NC_037342.1:1516455-1516698(-)	BosSINEL	51.98	48.02	551	509	22	507	1	6	1/0	1/0	1/0	1/0	1/0	1/0	1/0	1/0	1/0	1/0	1/0	1/0	1/0	1/0	1/0	1/0	1/0	1/0	1/0	1/0	1/0	1/0	1/0	1/0	1/0	1/0	1/0	1/0	1/0	1/0	1/0	1/0	1/0	1/0	1/0	1/0	1/0	1/0	1/0	1/0
NC_037342.1:2024648-2024931(-)	BosSINEL	58.21	41.79	617	443	91	435	4	6	1/0	1/0	1/0	1/0	1/0	1/0	1/0	1/0	1/0	1/0	1/0	1/0	1/0	1/0	1/0	1/0	1/0	1/0	1/0	1/0	1/0	1/0	1/0	1/0	1/1	1/0	1/0	1/0	1/0	1/0	1/0	1/0	1/0	1/0	1/0	1/0	1/0	1/1	1/0	1/0
NC_037342.1:2106021-2106133(+)	BosSINEL	49.07	50.93	526	546	0	526	10	0	1/0	1/0	1/0	1/0	1/0	1/0	1/0	1/0	1/0	1/0	1/0	1/0	1/0	1/0	1/0	1/0	1/0	1/0	1/0	1/0	1/0	1/0	1/0	1/0	1/0	1/0	1/0	1/0	1/0	1/0	1/0	1/0	1/0	1/0	1/0	1/0	1/0	1/0	1/0	1/0
NC_037342.1:2312715-2312983(-)	BosSINEL	47.95	52.05	514	558	0	514	22	0	1/0	1/0	1/0	1/0	1/0	1/0	1/0	0/0	1/0	1/0	1/0	1/0	1/0	1/0	1/0	1/0	1/0	1/0	1/0	1/0	1/0	1/0	1/0	1/0	1/0	1/0	1/0	1/0	1/0	1/0	1/0	1/0	1/0	1/0	1/0	1/0	1/0	1/0	1/0	1/0
NC_037342.1:2453327-2453602(-)	BosSINEL	49.34	50.66	525	539	0	525	7	4	1/0	1/0	1/0	1/0	1/0	1/0	1/0	1/0	1/0	1/0	1/0	1/0	1/0	1/0	1/0	1/0	1/0	1/0	1/0	1/0	1/0	1/0	1/0	1/0	1/0	1/0	1/0	1/0	1/0	1/0	1/0	1/0	1/0	1/0	1/0	1/0	1/0	1/0	1/0	1/0
NC_037342.1:3002874-3002966(+)	BosSINEL	49.25	50.75	526	542	0	526	8	2	1/0	1/0	1/0	1/0	1/0	1/0	1/0	1/0	1/0	1/0	1/0	1/0	1/0	1/0	1/0	1/0	1/0	1/0	1/0	1/0	1/0	1/0	1/0	1/0	1/0	1/0	1/0	1/0	1/0	1/0	1/0	1/0	1/0	1/0	1/0	1/0	1/0	1/0	1/0	1/0
NC_037342.1:3883091-3883275(-)	BosSINEL	89.91	10.09	953	107	423	107	0	6	1/1	1/1	1/1	1/1	1/1	1/1	1/1	1/1	1/1	1/0	1/0	1/0	1/0	1/1	1/0	1/0	1/1	1/1	1/1	1/1	1/1	1/1	1/1	1/1	1/0	1/0	1/1	1/1	1/1	1/1	1/0	1/0	1/1	1/1	1/1	1/1	1/1	1/1	1/1	1/0
NC_037342.1:5120724-5120783(+)	BosSINEL	79.67	20.33	827	211	314	199	6	17	1/1	1/0	1/1	1/1	1/1	1/0	1/1	1/1	1/0	1/0	1/1	1/1	1/0	1/1	1/0	1/0	1/1	1/1	1/1	1/0	1/1	1/1	1/1	1/0	1/0	1/0	1/1	1/1	1/0	1/0	1/1	1/0	1/0	1/0	1/1	1/0	1/1	1/0	1/1	1/1
NC_037342.1:5461563-5461840(-)	BosSINEL	51.78	48.22	552	514	24	504	5	3	1/0	1/0	1/0	1/0	1/0	1/1	1/0	1/0	1/0	1/0	1/0	1/0	1/0	1/0	1/0	1/0	1/0	1/1	1/0	1/0	1/0	1/0	1/0	1/0	1/0	1/0	1/0	1/0	1/0	1/1	1/0	1/0	1/0	1/0	1/0	1/0	1/0	1/0	1/0	1/0
NC_037342.1:5576381-5576656(+)	BosSINEL	54.49	45.51	570	476	64	442	17	13	1/0	1/0	1/0	1/0	1/0	1/0	1/0	0/0	1/0	1/0	1/0	1/0	1/0	1/0	1/0	1/0	1/0	1/0	1/0	1/0	1/0	1/1	1/0	1/0	1/0	1/0	1/0	1/0	1/0	1/0	1/0	1/0	1/0	1/0	1/0	1/0	1/0	1/0	1/0	1/0
NC_037342.1:6753291-6753566(-)	BosSINEL	81.25	18.75	858	198	332	194	2	8	1/1	1/1	1/1	1/1	1/0	1/0	1/1	1/0	1/1	1/0	1/0	1/0	1/0	1/1	1/1	1/1	1/0	1/0	1/1	1/0	1/1	1/0	1/0	1/0	1/0	1/1	1/0	1/0	1/0	1/0	1/1	1/0	1/0	1/0	1/0	1/1	1/0	1/0	1/0	1/0
NC_037342.1:6978447-6978708(-)	BosSINEL	66.92	33.08	708	350	181	346	2	7	1/0	1/0	1/1	1/1	1/0	1/0	1/0	1/1	1/0	1/1	1/1	1/1	1/0	1/1	1/1	1/0	1/0	1/0	1/0	1/0	1/0	1/1	1/1	1/1	1/0	1/0	1/0	1/1	1/0	1/1	1/0	1/0	1/1	1/0	1/0	1/0	1/1	1/1	1/0	1/1
NC_037342.1:7634541-7634663(-)	BosSINEL	87.15	12.85	922	136	393	136	0	7	1/1	1/1	1/0	1/0	1/1	1/1	1/1	1/1	1/1	1/0	1/0	1/1	1/0	1/1	1/1	1/1	1/1	1/1	1/1	1/1	1/0	1/0	1/1	1/1	1/1	1/1	1/1	1/1	1/1	1/1	1/1	1/0	1/0	1/1	1/1	1/1	1/1	1/1	1/1	1/0
NC_037342.1:7646104-7646379(-)	BosSINEL	89.62	10.38	932	108	414	104	2	16	1/1	1/1	1/1	1/1	1/1	1/1	1/1	1/0	1/0	1/0	1/0	1/1	1/1	1/1	1/0	1/1	1/0	1/1	1/0	1/0	1/0	1/0	1/0	1/0	1/0	1/0	1/1	1/1	1/0	1/1	1/1	1/1	1/1	1/1	1/1	1/0	1/1	1/1	1/0	1/1
NC_037342.1:8748218-8748476(-)	BosSINEL	52.83	47.17	560	500	33	494	3	6	1/0	1/0	1/1	1/0	1/0	1/0	1/0	1/0	1/0	1/0	1/0	1/0	1/0	1/0	1/0	1/0	1/0	1/0	1/0	1/0	1/0	1/0	1/0	1/0	1/0	1/0	1/0	1/0	1/0	1/0	1/0	1/0	1/0	1/0	1/0	1/0	1/0	1/0	1/0	1/0
NC_037342.1:9243122-9243159(+)	BosSINEL	53.21	46.79	564	496	42	480	8	6	1/0	1/0	1/0	1/0	1/0	1/0	1/0	1/0	1/0	1/0	1/0	1/0	1/0	1/0	1/0	1/0	1/0	1/0	1/0	1/0	1/1	1/0	1/0	1/0	1/0	1/0	1/0	1/0	1/0	1/0	1/0	1/0	1/0	1/0	1/0	1/0	1/0	1/0	1/0	1/0
NC_037342.1:9589716-9589991(+)	BosSINEL	57.7	42.3	607	445	87	433	6	10	1/1	1/0	1/0	1/0	1/0	1/0	1/0	1/0	1/0	1/0	1/0	1/0	1/0	1/0	1/0	1/0	1/0	1/0	1/0	1/0	1/0	1/0	1/0	1/0	1/0	1/0	1/0	1/0	1/0	1/0	1/0	1/0	1/0	1/0	1/0	1/0	1/0	1/0	1/1	1/0
NC_037342.1:9693813-9693937(-)	BosSINEL	78.42	21.58	825	227	302	221	3	10	1/1	1/1	1/1	1/1	1/0	1/1	1/0	1/1	1/0	1/1	1/0	1/0	1/0	1/1	1/1	1/0	1/1	1/1	1/1	1/0	1/0	1/0	1/0	1/0	1/1	1/1	1/1	1/1	1/0	1/0	1/1	1/0	1/0	1/0	1/0	1/0	1/0	1/0	1/1	1/0
NC_037342.1:10210170-10210445(-)	BosSINEL	47.76	52.24	511	559	0	511	24	1	1/0	1/0	1/0	1/0	1/0	1/0	1/0	1/0	1/0	1/0	1/0	1/0	1/0	1/0	1/0	1/0	1/0	1/0	1/0	1/0	1/0	1/0	1/0	1/0	1/0	1/0	1/0	1/0	1/0	1/0	1/0	1/0	1/0	1/0	1/0	1/0	1/0	1/0	1/0	1/0
NC_037342.1:10577972-10578232(-)	BosSINEL	89.63	10.37	925	107	413	99	4	20	1/1	1/1	1/1	1/1	1/1	1/0	1/0	1/1	1/0	1/1	1/1	1/1	1/1	1/1	1/1	1/1	1/0	1/1	1/0	1/1	1/0	1/1	1/1	1/1	1/0	1/1	1/1	1/1	1/1	1/1	1/1	1/1	1/0	1/1	1/0	1/0	1/0	1/0	1/1	1/1
NC_037342.1:10674287-10674554(+)	BosSINEL	49.06	50.94	524	544	0	524	10	2	1/0	1/0	1/0	1/0	1/0	1/0	1/0	1/0	1/0	1/0	1/0	1/0	1/0	1/0	1/0	1/0	1/0	1/0	1/0	1/0	1/0	1/0	1/0	1/0	1/0	1/0	1/0	1/0	1/0	1/0	1/0	1/0	1/0	1/0	1/0	1/0	1/0	1/0	1/0	1/0
NC_037342.1:11435997-11436267(-)	BosSINEL	49.81	50.19	528	532	0	528	2	6	1/0	1/0	1/0	1/0	1/0	1/0	1/0	1/0	1/0	1/0	1/0	1/0	1/0	1/0	1/0	1/0	1/0	1/0	1/0	1/0	1/0	1/0	1/0	1/0	1/0	1/0	1/0	1/0	1/0	1/0	1/0	1/0	1/0	1/0	1/0	1/0	1/0	1/0	1/0	1/0
NC_037342.1:11791866-11791999(+)	BosSINEL	49.44	50.56	529	541	0	529	6	1	1/0	1/0	1/0	1/0	1/0	1/0	1/0	1/0	1/0	1/0	1/0	1/0	1/0	1/0	1/0	1/0	1/0	1/0	1/0	1/0	1/0	1/0	1/0	1/0	1/0	1/0	1/0	1/0	1/0	1/0	1/0	1/0	1/0	1/0	1/0	1/0	1/0	1/0	1/0	1/0
NC_037342.1:12543979-12544254(-)	BosSINEL	56.53	43.47	597	459	74	449	5	8	1/1	1/0	1/0	1/0	1/0	1/0	1/0	1/0	1/0	1/0	1/0	1/0	1/0	1/0	1/0	1/0	1/0	1/0	1/0	1/0	1/0	1/0	1/0	1/0	1/0	1/0	1/0	1/0	1/0	1/0	1/0	1/0	1/0	1/0	1/0	1/0	1/0	1/0	1/0	1/0
NC_037342.1:13047590-13047858(-)	BosSINEL	49.62	50.38	526	534	0	526	4	6	1/0	1/0	1/0	1/0	1/0	1/0	1/0	1/0	1/0	1/0	1/0	1/0	1/0	1/0	1/0	1/0	1/0	1/0	1/0	1/0	1/0	1/0	1/0	1/0	1/0	1/0	1/0	1/0	1/0	1/0	1/0	1/0	1/0	1/0	1/0	1/0	1/0	1/0	1/0	1/0
NC_037342.1:13378935-13379199(-)	BosSINEL	49.34	50.66	527	541	4	519	11	2	1/0	1/0	1/0	1/0	1/0	1/0	1/1	1/0	1/0	1/0	1/0	1/0	1/0	1/0	1/0	1/0	1/0	1/0	1/0	1/0	1/0	1/0	1/0	1/0	1/0	1/0	1/0	1/0	1/0	1/0	1/0	1/0	1/0	1/0	1/0	1/0	1/0	1/0	1/0	1/0
NC_037342.1:13757202-13757482(+)	BosSINEL	86.16	13.84	903	145	379	145	0	12	1/1	1/1	1/1	1/1	1/0	1/0	1/0	1/0	1/0	1/0	1/1	1/0	1/0	1/1	1/1	1/0	1/1	1/1	1/0	1/0	1/1	1/0	1/1	1/1	1/1	1/0	1/1	1/1	1/1	1/0	1/0	1/0	1/0	1/0	1/1	1/0	1/0	1/0	1/0	1/1
NC_037342.1:13760406-13760680(-)	BosSINEL	81.46	18.54	857	195	331	195	0	10	1/1	1/0	1/1	1/1	1/0	1/0	1/1	1/1	1/0	1/0	1/1	1/0	1/1	1/0	1/1	1/0	1/1	1/1	1/0	1/0	1/1	1/0	1/0	1/1	1/1	1/0	1/0	1/0	1/1	1/0	1/0	1/0	1/1	1/1	1/0	1/1	1/0	1/0	1/0	1/1
NC_037342.1:13812640-13812915(-)	BosSINEL	62.33	37.67	652	394	136	380	7	13	1/0	1/1	1/0	1/1	1/0	1/0	1/0	1/0	1/0	1/0	1/0	1/0	1/0	1/1	1/0	1/0	1/0	1/0	1/0	1/0	1/0	NA	1/0	1/0	1/0	1/0	1/1	1/1	1/0	1/0	1/0	1/0	1/1	1/0	1/0	1/0	1/0	1/0	1/1	1/1
NC_037342.1:14797638-14797888(-)	BosSINEL	86.29	13.71	913	145	384	145	0	7	1/1	1/0	1/1	1/1	1/0	1/0	1/0	1/1	1/0	1/1	1/0	1/0	1/1	1/1	1/1	1/1	1/1	1/1	1/0	1/0	1/1	1/0	1/1	1/1	1/1	1/0	1/1	1/1	1/1	1/0	1/1	1/1	1/0	1/0	1/1	1/1	1/1	1/0	1/1	1/0
NC_037342.1:14840442-14840713(+)	BosSINEL	49.16	50.84	526	544	0	526	9	1	1/0	1/0	1/0	1/0	1/0	1/0	1/0	1/0	1/0	1/0	1/0	1/0	1/0	1/0	1/0	1/0	1/0	1/0	1/0	1/0	1/0	1/0	1/0	1/0	1/0	1/0	1/0	1/0	1/0	1/0	1/0	1/0	1/0	1/0	1/0	1/0	1/0	1/0	1/0	1/0
NC_037342.1:14859458-14859727(+)	BosSINEL	65.66	34.34	696	364	174	348	8	6	1/1	1/1	1/1	1/1	1/0	1/0	1/0	1/0	1/0	1/0	1/0	1/0	1/0	1/0	1/0	1/0	1/0	1/0	1/0	1/0	1/0	1/0	1/0	1/0	1/0	1/0	1/0	1/0	1/0	1/0	1/0	1/0	1/0	1/0	1/0	1/0	1/1	1/0	1/0	1/0
NC_037342.1:14892366-14892641(-)	BosSINEL	67.97	32.03	711	335	190	331	2	13	1/0	1/0	1/0	1/0	1/1	1/1	1/0	1/0	1/1	1/0	1/0	1/0	1/1	1/1	1/1	1/0	1/1	1/0	1/0	1/0	1/0	1/0	1/1	1/1	1/0	1/1	1/1	1/1	1/1	1/1	1/1	1/1	1/0	1/0	1/1	1/1	1/1	1/0	1/0	1/0
NC_037342.1:15754682-15754941(+)	BosSINEL	77.95	22.05	820	232	294	232	0	10	1/1	1/0	1/0	1/0	1/1	1/1	1/1	1/1	1/0	1/1	1/0	1/0	1/1	1/0	1/1	1/1	1/0	1/0	1/1	1/1	1/1	1/1	1/1	1/0	1/1	1/0	1/1	1/1	1/0	1/0	1/0	1/0	1/1	1/1	1/1	1/0	1/0	1/0	1/1	1/1
NC_037342.1:16162766-16163040(-)	BosSINEL	74.19	25.81	782	272	262	258	7	9	1/0	1/1	1/1	1/1	1/0	1/0	1/0	1/0	1/0	1/1	1/0	1/0	1/0	1/0	1/1	1/0	1/0	1/0	1/0	1/0	1/0	1/0	1/0	1/0	1/0	1/0	1/0	1/0	1/0	1/0	1/0	1/0	1/0	1/0	1/0	1/0	1/0	1/0	1/0	1/0
NC_037342.1:16229748-16230024(-)	BosSINEL	51.22	48.78	546	520	17	512	4	3	1/0	1/0	1/0	1/0	1/0	1/0	1/0	1/0	1/0	1/0	1/0	1/0	1/0	1/0	1/0	1/1	1/0	1/0	1/0	1/0	1/0	1/0	1/0	1/0	1/0	1/0	1/0	1/0	1/0	1/0	1/0	1/0	1/0	1/0	1/0	1/0	1/0	1/0	1/0	1/0
NC_037342.1:16358131-16358398(+)	BosSINEL	65.65	34.35	692	362	166	360	1	9	1/0	1/0	1/0	1/0	1/0	1/1	1/0	1/0	1/1	1/1	1/1	1/0	1/0	1/0	1/0	1/0	1/1	1/0	1/1	1/0	1/0	1/1	1/1	1/0	1/0	1/1	1/0	1/0	1/0	1/0	1/1	1/0	1/0	1/0	1/0	1/0	1/0	1/1	1/0	1/0
NC_037342.1:16672538-16672812(+)	BosSINEL	46.83	53.17	502	570	0	502	34	0	1/0	1/0	1/0	1/0	1/0	1/0	1/0	1/0	1/0	1/0	1/0	1/0	1/0	1/0	1/0	1/0	1/0	1/0	1/0	1/0	1/0	1/0	0/0	1/0	1/0	1/0	1/0	1/0	1/0	1/0	1/0	1/0	1/0	1/0	1/0	1/0	1/0	1/0	1/0	1/0
NC_037342.1:17055302-17055577(+)	BosSINEL	86.59	13.41	904	140	383	138	1	14	1/0	1/1	1/1	1/0	1/1	1/1	1/1	1/1	1/1	1/0	1/1	1/1	1/1	1/1	1/1	1/1	1/1	1/1	1/1	1/1	1/1	1/0	1/1	1/1	1/1	1/0	1/0	1/1	1/1	1/1	1/1	1/1	1/0	1/0	1/1	1/1	1/1	1/1	1/1	1/0
NC_037342.1:17249375-17249598(+)	BosSINEL	50.47	49.53	534	524	10	514	5	7	1/0	1/0	1/0	1/0	1/0	1/0	1/0	1/0	1/0	1/0	1/0	1/0	1/0	1/0	1/0	1/0	1/0	1/0	1/0	1/0	1/0	1/0	1/0	1/0	1/0	1/0	1/0	1/0	1/0	1/0	1/0	1/0	1/0	1/0	1/0	1/0	1/0	1/0	1/0	1/0
NC_037342.1:18081072-18081336(-)	BosSINEL	81.7	18.3	866	194	336	194	0	6	1/1	1/0	1/0	1/0	1/0	1/1	1/0	1/0	1/1	1/0	1/1	1/0	1/1	1/1	1/1	1/1	1/1	1/1	1/0	1/1	1/1	1/0	1/1	1/1	1/0	1/0	1/1	1/1	1/1	1/0	1/1	1/1	1/0	1/1	1/1	1/1	1/1	1/1	1/0	1/0
NC_037342.1:18138647-18138911(+)	BosSINEL	49.16	50.84	524	542	0	524	9	3	1/0	1/0	1/0	1/0	1/0	1/0	1/0	1/0	1/0	1/0	1/0	1/0	1/0	1/0	1/0	1/0	1/0	1/0	1/0	1/0	1/0	1/0	1/0	1/0	1/0	1/0	1/0	1/0	1/0	1/0	1/0	1/0	1/0	1/0	1/0	1/0	1/0	1/0	1/0	1/0
NC_037342.1:18143379-18143655(-)	BosSINEL	71.25	28.75	751	303	226	299	2	9	1/1	1/1	1/0	1/0	1/1	1/1	1/1	1/0	1/0	1/0	1/1	1/1	1/0	1/1	1/0	1/1	1/0	1/0	1/1	1/0	1/0	1/1	1/1	1/0	1/0	1/1	1/0	1/1	1/1	1/1	1/0	1/1	1/1	1/0	1/0	1/1	1/1	1/0	1/0	1/0
NC_037342.1:18482804-18483076(+)	BosSINEL	53.15	46.85	556	490	37	482	4	13	1/1	1/0	1/0	1/0	1/0	1/0	1/0	1/0	1/0	1/0	1/0	1/0	1/0	1/0	1/0	1/1	1/0	1/0	1/0	1/0	1/0	1/0	1/0	1/0	1/0	1/0	1/0	1/0	1/0	1/0	1/0	1/0	1/0	1/0	1/0	1/0	1/0	1/0	1/0	1/0
NC_037342.1:18957637-18957897(-)	BosSINEL	39.89	60.11	422	636	10	402	117	7	1/0	1/0	1/0	1/0	1/0	1/0	0/0	1/0	0/0	0/0	1/0	1/0	1/0	1/0	0/0	0/0	0/0	1/0	1/0	0/0	1/0	1/0	1/0	0/0	1/0	1/0	1/0	1/0	0/0	0/0	1/0	0/0	1/0	1/0	1/0	1/0	1/0	1/0	1/0	1/0
NC_037342.1:19054852-19055113(-)	BosSINEL	68.5	31.5	722	332	197	328	2	9	1/1	1/1	1/1	1/1	1/0	1/1	1/0	1/0	1/0	1/1	1/0	1/0	1/0	1/0	1/1	1/0	1/0	1/0	1/1	1/0	1/0	1/0	1/0	1/0	1/0	1/0	1/0	1/0	1/0	1/0	1/0	1/0	1/0	1/0	1/0	1/0	1/0	1/0	1/0	1/0
NC_037342.1:19489767-19489813(-)	BosSINEL	67.74	32.26	718	342	191	336	3	6	1/1	1/1	1/1	1/0	1/0	1/0	1/0	1/0	1/0	1/0	1/0	1/0	1/0	1/0	1/0	1/0	1/0	1/0	1/0	1/0	1/0	1/0	1/0	1/1	1/0	1/0	1/1	1/0	1/0	1/0	1/0	1/0	1/0	1/0	1/0	1/0	1/0	1/0	1/0	1/0
NC_037342.1:19496686-19496962(+)	BosSINEL	51.14	48.86	537	513	27	483	15	11	1/0	1/0	1/0	1/0	1/0	1/0	1/0	1/0	1/0	1/0	1/0	1/0	1/0	1/0	1/0	1/0	1/0	1/0	1/0	1/0	1/0	1/0	1/0	1/0	1/0	1/0	1/0	1/0	1/0	1/0	1/0	1/0	1/0	1/0	1/0	1/0	1/0	1/0	1/0	1/0
NC_037342.1:20566095-20566366(+)	BosSINEL	67.86	32.14	699	331	184	331	0	21	1/0	1/0	1/0	1/0	1/1	1/1	1/0	1/0	1/0	1/0	1/0	1/1	1/1	1/0	1/0	1/1	1/1	1/1	1/0	1/1	1/1	1/1	1/1	1/1	1/1	1/0	1/0	1/0	1/1	1/0	1/0	1/1	1/0	1/1	1/0	1/1	1/1	1/1	1/0	1/0
NC_037342.1:20996765-20997041(-)	BosSINEL	51.69	48.31	552	516	30	492	12	2	1/0	1/0	1/0	1/0	1/0	1/1	1/0	1/0	1/0	1/0	1/0	1/0	1/0	1/0	1/0	1/0	1/0	1/0	1/0	1/0	1/0	1/0	1/0	1/0	1/0	1/0	1/0	1/0	1/1	1/0	1/0	1/0	1/0	1/0	1/0	1/0	1/0	1/0	1/0	1/0
NC_037342.1:21276554-21276775(+)	BosSINEL	63.95	36.05	674	380	149	376	2	9	1/1	1/0	1/0	1/0	1/0	1/1	1/0	1/0	1/1	1/0	1/0	1/0	1/0	1/0	1/0	1/1	1/0	1/0	1/0	1/1	1/0	1/0	1/1	1/0	1/0	1/1	1/0	1/0	1/0	1/0	1/1	1/0	1/0	1/1	1/0	1/1	1/0	1/0	1/1	1/0
NC_037342.1:21861733-21862009(+)	BosSINEL	73.52	26.48	772	278	250	272	3	11	1/0	1/1	1/0	1/0	1/1	1/1	1/0	1/1	1/0	1/1	1/0	1/0	1/0	1/1	1/0	1/1	1/0	1/1	1/1	1/1	1/0	1/0	1/0	1/1	1/1	1/0	1/1	1/0	1/0	1/1	1/1	1/0	1/0	1/1	1/0	1/0	1/0	1/0	1/1	1/0
NC_037342.1:22284586-22284842(+)	BosSINEL	81.7	18.3	853	191	333	187	2	14	1/1	1/1	1/0	1/1	1/0	1/1	1/1	1/1	1/0	1/1	1/1	1/0	1/1	1/0	1/0	1/0	1/1	1/1	1/0	1/1	1/1	1/1	1/1	1/0	1/0	1/0	1/0	1/0	1/1	1/1	1/0	1/0	1/0	1/0	1/1	1/1	1/0	1/0	1/0	1/1
NC_037342.1:22428252-22428369(-)	BosSINEL	50.28	49.72	531	525	5	521	2	8	1/0	1/0	1/0	1/0	1/0	1/0	1/0	1/0	1/0	1/0	1/0	1/0	1/0	1/0	1/0	1/0	1/0	1/0	1/0	1/0	1/0	1/0	1/0	1/0	1/0	1/0	1/0	1/0	1/0	1/0	1/0	1/0	1/0	1/0	1/0	1/0	1/0	1/0	1/0	1/0
NC_037342.1:22862851-22863114(-)	BosSINEL	88.92	11.08	939	117	412	115	1	8	1/0	1/1	1/1	1/0	1/1	1/1	1/1	1/1	1/1	1/1	1/1	1/1	1/1	1/1	1/1	1/1	1/1	1/1	1/0	1/1	1/1	1/1	1/0	1/1	1/1	1/1	1/1	1/1	1/1	1/1	1/1	1/1	1/1	1/1	1/1	1/1	1/0	1/1	1/1	1/1
NC_037342.1:24397244-24397509(-)	BosSINEL	87.05	12.95	914	136	391	132	2	11	1/1	1/1	1/1	1/1	1/1	1/0	1/1	1/1	1/0	1/1	1/0	1/1	1/1	1/1	1/0	1/1	1/1	1/0	1/1	1/0	1/1	1/1	1/1	1/1	1/1	1/1	1/1	1/1	1/1	1/1	1/0	1/1	1/1	1/1	1/1	1/1	1/1	1/0	1/1	1/0
NC_037342.1:26428810-26429086(-)	BosSINEL	50.19	49.81	532	528	21	490	19	6	1/0	1/0	1/0	1/0	1/0	1/0	1/0	1/0	1/0	1/0	1/0	1/0	1/0	1/0	1/0	1/0	1/0	1/0	1/0	1/0	1/0	1/0	1/0	1/0	1/0	1/0	1/0	1/0	1/0	1/0	1/0	1/0	1/0	1/0	1/0	1/0	1/0	1/0	1/0	1/0
NC_037342.1:26551457-26551666(-)	BosSINEL	82.22	17.78	860	186	338	184	1	13	1/1	1/1	1/1	1/0	1/1	1/1	1/1	1/1	1/1	1/0	1/1	1/1	1/0	1/0	1/1	1/0	1/0	1/0	1/1	1/0	1/0	1/1	1/1	1/0	1/0	1/0	1/1	1/0	1/1	1/1	1/1	1/1	1/1	1/1	1/0	1/1	1/1	1/1	1/0	1/1
NC_037342.1:27184848-27185122(+)	BosSINEL	51.23	48.77	543	517	25	493	12	6	1/0	1/0	1/0	1/0	1/0	1/0	1/0	1/0	1/0	1/0	1/0	1/0	1/0	1/0	1/0	1/0	1/0	1/0	1/0	1/0	1/0	1/0	1/0	1/0	1/0	1/0	1/0	1/0	1/0	1/0	1/0	1/0	1/0	1/0	1/0	1/0	1/0	1/0	1/0	1/0
NC_037342.1:29221049-29221321(-)	BosSINEL	54.36	45.64	574	482	51	472	5	8	1/0	1/0	1/0	1/0	1/0	1/0	1/0	1/0	1/0	1/0	1/0	1/0	1/0	1/0	1/0	1/0	1/0	1/1	1/0	1/0	1/0	1/0	1/0	1/0	0/0	1/0	1/0	1/0	1/0	1/0	1/0	1/0	1/0	1/0	1/0	1/0	1/0	1/0	1/0	1/0
NC_037342.1:29315118-29315389(+)	BosSINEL	50.95	49.05	536	516	28	480	18	10	1/0	1/0	1/0	1/0	1/0	1/0	1/0	1/0	1/0	1/0	1/0	1/0	1/0	1/0	1/0	1/0	0/0	1/0	1/0	1/0	1/0	1/0	1/0	1/0	1/0	1/0	1/0	1/0	1/0	1/0	1/0	1/0	1/0	1/0	1/0	1/0	1/0	1/0	1/0	1/0
NC_037342.1:29538325-29538600(+)	BosSINEL	54.09	45.91	569	483	51	467	8	10	1/0	1/0	1/0	1/0	1/0	1/0	1/0	1/0	1/0	1/0	1/0	1/1	1/0	1/0	1/1	1/1	1/0	1/0	1/1	1/1	1/0	1/0	1/1	1/0	1/0	1/0	1/0	1/0	1/0	1/0	1/0	1/0	1/0	1/0	1/1	1/0	1/0	1/0	1/0	1/0
NC_037342.1:30649856-30650110(+)	BosSINEL	50	50	530	530	13	504	13	6	1/0	1/0	1/0	1/0	1/0	1/0	1/0	1/0	1/0	1/0	1/0	1/0	1/0	1/0	1/0	1/0	1/0	1/0	1/0	1/0	1/0	1/0	1/0	1/0	1/0	1/0	1/0	1/0	1/0	1/0	1/0	1/0	1/0	1/0	1/0	1/0	1/0	1/0	1/0	1/0
NC_037342.1:32457354-32457620(-)	BosSINEL	89.13	10.87	927	113	407	113	0	16	1/0	1/1	1/1	1/1	1/1	1/1	1/1	1/1	1/1	1/1	1/0	1/0	1/1	1/1	1/0	1/1	1/0	1/1	1/1	1/1	1/1	1/1	1/1	1/1	1/1	1/0	1/0	1/1	1/0	1/1	1/0	1/1	1/1	1/1	1/0	1/1	1/0	1/1	1/1	1/1
NC_037342.1:32652340-32652612(-)	BosSINEL	58.54	41.46	617	437	100	417	10	9	1/0	1/1	1/0	1/0	1/0	1/0	1/0	1/1	1/0	1/0	1/0	1/0	1/0	1/0	1/0	1/0	1/0	1/0	1/0	1/1	1/0	1/0	1/0	1/0	1/0	1/0	1/0	1/0	1/1	1/0	1/0	1/0	1/0	1/0	1/0	1/0	1/0	1/0	1/0	1/0
NC_037342.1:33275278-33275410(+)	BosSINEL	53.95	46.05	573	489	52	469	10	5	1/0	1/0	1/1	1/0	1/0	1/0	1/0	1/0	1/0	1/0	1/0	1/0	1/0	1/0	1/0	1/0	1/0	1/0	1/0	1/0	1/0	1/0	1/0	1/0	1/0	1/0	1/0	1/0	1/0	1/0	1/0	1/0	1/0	1/0	1/0	1/0	1/0	1/0	1/0	1/0
NC_037342.1:35169505-35169638(-)	BosSINEL	49.91	50.09	532	534	16	500	17	3	1/0	1/0	1/0	1/0	1/0	1/0	1/0	1/0	1/0	1/0	1/0	1/0	1/0	1/0	1/0	1/0	1/0	1/0	1/0	1/0	1/0	1/0	1/0	1/0	1/0	1/0	1/0	1/0	1/0	1/0	1/0	1/0	1/0	1/0	1/0	1/0	1/0	1/0	1/0	1/0
NC_037342.1:35913520-35913791(+)	BosSINEL	75.9	24.1	800	254	276	248	3	9	1/0	1/0	1/0	1/0	1/1	1/1	1/1	1/0	1/1	1/1	1/1	1/1	1/1	1/1	1/1	1/0	1/0	1/1	1/1	1/1	1/1	1/0	1/1	1/1	1/0	1/1	1/0	1/1	0/0	1/0	1/0	1/0	1/1	1/0	1/1	1/1	1/0	1/1	1/1	1/1
NC_037342.1:37117019-37117290(-)	BosSINEL	49.16	50.84	525	543	0	525	9	2	1/0	1/0	1/0	1/0	1/0	1/0	1/0	1/0	1/0	1/0	1/0	1/0	1/0	1/0	1/0	1/0	1/0	1/0	1/0	1/0	1/0	1/0	1/0	1/0	1/0	1/0	1/0	1/0	1/0	1/0	1/0	1/0	1/0	1/0	1/0	1/0	1/0	1/0	1/0	1/0
NC_037342.1:37118229-37118505(+)	BosSINEL	49.25	50.75	528	544	0	528	8	0	1/0	1/0	1/0	1/0	1/0	1/0	1/0	1/0	1/0	1/0	1/0	1/0	1/0	1/0	1/0	1/0	1/0	1/0	1/0	1/0	1/0	1/0	1/0	1/0	1/0	1/0	1/0	1/0	1/0	1/0	1/0	1/0	1/0	1/0	1/0	1/0	1/0	1/0	1/0	1/0
NC_037342.1:38379239-38379506(-)	BosSINEL	73.28	26.72	768	280	249	270	5	12	1/1	1/1	1/1	1/0	1/0	1/0	1/0	1/0	1/0	1/1	1/0	1/0	1/1	1/0	1/0	1/0	1/1	1/0	1/0	1/0	1/0	1/0	1/0	1/0	1/0	1/0	1/0	1/0	1/0	1/1	1/0	1/0	1/0	1/0	1/0	1/0	1/0	1/0	1/0	1/0
NC_037342.1:38522045-38522266(-)	BosSINEL	83.27	16.73	871	175	348	175	0	13	1/1	1/1	1/1	1/1	1/0	1/1	1/1	1/0	1/1	1/1	1/1	1/0	1/1	1/1	1/1	1/0	1/1	1/1	1/1	1/0	1/0	1/1	1/0	1/0	1/1	1/1	1/1	1/1	1/1	1/0	1/0	1/1	1/0	1/1	1/1	1/0	1/0	1/1	1/1	1/0
NC_037342.1:39020982-39021257(+)	BosSINEL	71.01	28.99	747	305	227	293	6	10	1/1	1/1	1/1	1/1	1/0	1/0	1/1	1/0	1/1	1/0	1/0	1/0	1/0	1/0	1/0	1/0	1/0	1/0	1/0	1/0	1/0	1/0	1/0	1/0	1/1	1/0	1/1	1/0	1/0	1/0	1/0	1/0	1/0	1/0	1/0	1/0	1/0	1/0	1/1	1/0
NC_037342.1:41851761-41851873(+)	BosSINEL	48.88	51.12	523	547	0	523	12	1	1/0	1/0	1/0	1/0	1/0	1/0	1/0	1/0	1/0	1/0	1/0	1/0	1/0	1/0	1/0	1/0	1/0	1/0	1/0	1/0	1/0	1/0	1/0	1/0	1/0	1/0	1/0	1/0	1/0	1/0	1/0	1/0	1/0	1/0	1/0	1/0	1/0	1/0	1/0	1/0
NC_037342.1:42251385-42251659(-)	BosSINEL	55.7	44.3	586	466	71	444	11	10	1/0	1/0	1/0	1/0	1/0	1/1	1/0	1/0	1/1	1/1	1/0	1/0	1/0	1/0	1/0	1/0	1/1	1/1	1/0	1/0	1/0	1/0	1/0	1/0	1/0	1/0	1/0	1/0	1/1	1/0	1/0	1/0	1/0	1/0	1/0	1/0	1/0	1/0	1/0	1/0
NC_037342.1:42465175-42465439(+)	BosSINEL	89.24	10.76	937	113	413	111	1	11	1/1	1/1	1/1	1/1	1/1	1/1	1/1	1/1	1/1	1/1	1/1	1/1	1/1	1/1	1/0	1/1	1/0	1/1	1/0	1/1	1/0	1/1	1/0	1/1	1/1	1/1	1/0	1/0	1/1	1/1	1/1	1/0	1/0	1/1	1/0	1/1	1/0	1/0	1/0	1/1
NC_037342.1:42561021-42561289(+)	BosSINEL	49.16	50.84	525	543	3	519	12	2	1/0	1/0	1/0	1/0	1/0	1/0	1/0	1/0	1/0	1/0	1/0	1/0	1/0	1/0	1/0	1/0	1/0	1/0	1/0	1/0	1/0	1/0	1/0	1/0	1/0	1/0	1/0	1/0	1/0	1/0	1/0	1/0	1/0	1/0	1/0	1/0	1/0	1/0	1/0	1/0
NC_037342.1:42726293-42726419(-)	BosSINEL	62.91	37.09	658	388	137	384	2	13	1/0	1/0	1/0	1/0	1/1	1/0	1/0	1/0	1/0	1/0	1/0	1/0	1/1	1/1	1/1	1/0	1/0	1/0	1/0	1/1	1/0	1/0	1/1	1/0	1/1	1/0	1/0	1/0	1/0	1/1	1/0	1/0	1/0	1/0	1/0	1/0	1/0	1/0	1/0	1/0
NC_037342.1:43171291-43171566(-)	BosSINEL	52.85	47.15	557	497	46	465	16	9	1/0	1/0	1/0	1/0	1/0	1/1	1/0	1/0	1/0	1/1	1/0	1/0	1/0	1/0	1/0	1/0	1/0	1/0	1/0	1/0	1/0	1/0	1/0	1/0	1/1	1/0	1/1	1/0	1/0	1/0	1/0	1/0	1/0	1/0	1/0	1/0	1/0	1/0	1/0	1/0
NC_037342.1:43396485-43396760(+)	BosSINEL	86.72	13.28	895	137	379	137	0	20	1/1	1/1	1/1	1/1	1/0	1/1	1/1	1/1	1/1	1/0	1/0	1/1	1/1	1/1	1/1	1/1	1/0	1/1	1/0	1/1	1/1	1/1	1/1	1/0	1/1	1/0	1/1	1/1	1/0	1/1	1/0	1/1	1/0	1/1	1/1	1/1	1/1	1/0	1/0	1/1
NC_037342.1:43453813-43453862(+)	BosSINEL	14.2	85.8	146	882	5	136	373	22	0/0	0/0	1/0	0/0	0/0	0/0	1/0	1/0	1/0	0/0	1/0	0/0	0/0	0/0	0/0	0/0	0/0	0/0	0/0	0/0	1/0	1/0	0/0	1/0	0/0	0/0	1/0	0/0	0/0	0/0	0/0	1/0	0/0	0/0	1/0	0/0	0/0	0/0	0/0	1/0
NC_037342.1:44269311-44269576(-)	BosSINEL	63.99	36.01	677	381	148	381	0	7	1/0	1/0	1/0	1/0	1/1	1/0	1/0	1/1	1/0	1/1	1/0	1/0	1/0	1/0	1/0	1/0	1/0	1/1	1/0	1/0	1/0	1/1	1/0	1/0	1/1	1/1	1/1	1/1	1/0	1/1	1/0	1/1	1/0	1/0	1/1	1/0	1/1	1/1	1/0	1/0
NC_037342.1:44569142-44569406(+)	BosSINEL	54.43	45.57	578	484	55	468	8	5	1/0	1/0	1/0	1/0	1/0	1/0	1/0	1/0	1/0	1/0	1/0	1/0	1/0	1/0	1/0	1/1	1/0	1/0	1/1	1/0	1/0	1/0	1/0	1/0	1/0	1/0	1/0	1/1	1/0	1/0	1/0	1/0	1/0	1/0	1/0	1/0	1/0	1/0	1/0	1/0
NC_037342.1:44756784-44757061(-)	BosSINEL	48.41	51.59	519	553	0	519	17	0	1/0	1/0	1/0	1/0	1/0	1/0	1/0	1/0	1/0	1/0	1/0	1/0	1/0	1/0	1/0	1/0	1/0	1/0	1/0	1/0	1/0	1/0	1/0	1/0	1/0	1/0	1/0	1/0	1/0	1/0	1/0	1/0	1/0	1/0	1/0	1/0	1/0	1/0	1/0	1/0
NC_037342.1:44779823-44780096(-)	BosSINEL	53	47	547	485	159	229	128	20	0/0	0/0	1/0	1/1	1/0	1/0	1/0	0/0	1/1	1/1	1/1	1/0	1/1	1/1	1/0	1/0	1/1	1/0	1/0	0/0	1/0	0/0	1/1	1/1	1/0	1/0	0/0	1/1	1/1	1/1	1/1	1/0	0/0	0/0	1/0	1/0	1/1	0/0	1/0	1/1
NC_037342.1:44949544-44949812(+)	BosSINEL	89.56	10.44	944	110	417	110	0	9	1/1	1/1	1/1	1/1	1/1	1/0	1/1	1/0	1/0	1/1	1/1	1/0	1/1	1/1	1/1	1/0	1/1	1/1	1/0	1/0	1/1	1/1	1/1	1/0	1/0	1/1	1/1	1/1	1/0	1/1	1/1	1/1	1/0	1/1	1/0	1/0	1/1	1/1	1/0	1/1
NC_037342.1:45529347-45529622(+)	BosSINEL	65.57	34.43	695	365	165	365	0	6	1/0	1/1	1/0	1/1	1/0	1/0	1/0	1/0	1/0	1/0	1/0	1/0	1/0	1/0	1/0	1/1	1/0	1/0	1/0	1/0	1/0	1/0	1/0	1/0	1/0	1/0	1/0	1/0	1/0	1/0	1/0	1/1	1/0	1/0	1/0	1/0	1/0	1/0	1/0	1/1
NC_037342.1:45783291-45783419(+)	BosSINEL	52.08	47.92	551	507	25	501	3	7	1/0	1/0	1/0	1/0	1/0	1/0	1/0	1/0	1/0	1/0	1/0	1/0	1/0	1/0	1/0	1/0	1/0	1/0	1/0	1/0	1/0	1/0	1/0	1/0	1/0	1/0	1/0	1/0	1/0	1/0	1/0	1/0	1/0	1/0	1/0	1/0	1/0	1/0	1/0	1/0
NC_037342.1:45858080-45858338(+)	BosSINEL	86.21	13.79	900	144	381	138	3	14	1/1	1/1	1/0	1/1	1/1	1/1	1/1	1/0	1/0	1/1	1/1	1/1	1/1	1/1	1/1	1/0	1/1	1/1	1/1	1/1	1/0	1/0	1/1	1/1	1/1	1/1	1/0	1/1	1/1	1/1	1/1	1/0	1/1	1/1	1/1	1/1	1/1	1/1	1/1	1/0
NC_037342.1:45886312-45886588(+)	BosSINEL	69.58	30.42	732	320	207	318	1	10	1/0	1/0	1/0	1/0	1/1	1/0	1/0	1/0	1/0	1/0	1/0	1/1	1/1	1/1	1/1	1/1	1/0	1/1	1/1	1/0	1/0	1/0	1/1	1/0	1/0	1/0	1/0	1/0	1/0	1/0	1/1	1/0	1/0	1/0	1/0	1/0	1/1	1/0	1/1	1/0
NC_037342.1:45952766-45952953(+)	BosSINEL	67.3	32.7	712	346	184	344	1	7	1/1	1/1	1/0	1/0	1/0	1/0	1/0	1/0	1/0	1/0	1/0	1/0	1/0	0/0	1/0	1/0	1/0	1/1	1/0	1/1	1/0	1/0	1/1	1/0	1/0	1/0	1/0	1/0	1/0	1/0	1/1	1/0	1/1	1/1	1/0	1/0	1/0	1/0	1/0	1/0
NC_037342.1:45976803-45977079(+)	BosSINEL	38.37	61.63	406	652	86	234	209	7	1/0	1/0	0/0	0/0	1/0	0/0	0/0	1/0	0/0	0/0	0/0	0/0	1/0	1/0	1/0	1/0	1/0	1/1	1/0	1/0	0/0	1/0	1/1	1/0	0/0	1/0	0/0	1/0	0/0	1/0	1/1	0/0	1/0	1/0	0/0	1/0	1/0	0/0	1/0	1/0
NC_037342.1:46167093-46167367(-)	BosSINEL	49.25	50.75	522	538	0	522	8	6	1/0	1/0	1/0	1/0	1/0	1/0	1/0	1/0	1/0	1/0	1/0	1/0	1/0	1/0	1/0	1/0	1/0	1/0	1/0	1/0	1/0	1/0	1/0	1/0	1/0	1/0	1/0	1/0	1/0	1/0	1/0	1/0	1/0	1/0	1/0	1/0	1/0	1/0	1/0	1/0
NC_037342.1:46181060-46181319(-)	BosSINEL	50.66	49.34	535	521	14	507	7	8	1/0	1/0	1/0	1/0	1/0	1/0	1/0	1/0	1/0	1/0	1/0	1/0	1/0	1/0	1/0	1/0	1/0	1/0	1/0	1/0	1/0	1/0	1/0	1/0	1/0	1/0	1/0	1/0	1/0	1/0	1/0	1/0	1/0	1/0	1/0	1/0	1/0	1/0	1/0	1/0
NC_037342.1:46255249-46255524(+)	BosSINEL	49.43	50.57	523	535	2	519	8	7	1/0	1/0	1/0	1/0	1/0	1/0	1/0	1/0	1/0	1/0	1/0	1/0	1/0	1/0	1/0	1/0	1/0	1/0	1/0	1/0	1/0	1/0	1/0	1/0	1/0	1/0	1/0	1/0	1/0	1/0	1/0	1/0	1/0	1/0	1/0	1/0	1/0	1/0	1/0	1/0
NC_037342.1:46258067-46258343(+)	BosSINEL	63.76	36.24	672	382	147	378	2	9	1/0	1/0	1/0	1/0	1/1	1/0	1/0	1/1	1/0	1/0	1/0	1/0	1/1	1/0	1/0	1/1	1/0	1/1	1/0	1/0	1/0	1/1	1/1	1/0	1/0	1/0	1/0	1/0	1/0	1/0	1/1	1/0	1/0	1/0	1/0	1/0	1/0	1/0	1/0	1/0
NC_037342.1:46286116-46286386(+)	BosSINEL	48.96	51.04	517	539	3	511	14	8	1/0	1/0	1/0	1/0	1/0	1/0	1/0	1/0	0/0	1/0	1/0	1/0	1/0	1/0	1/0	1/0	1/0	1/0	1/0	1/0	1/0	1/0	1/0	1/0	1/0	1/0	1/0	1/0	1/0	1/0	1/0	1/0	1/0	1/0	1/0	1/0	1/0	1/0	1/0	1/0
NC_037342.1:46353260-46353530(+)	BosSINEL	88.31	11.69	922	122	400	122	0	14	1/1	1/1	1/1	1/1	1/0	1/1	1/0	1/1	1/0	1/1	1/0	1/1	1/1	1/1	1/1	1/1	1/1	1/1	1/1	1/1	1/1	1/1	1/1	1/1	1/0	1/1	1/1	1/1	1/1	1/1	1/1	1/1	1/1	1/1	1/0	1/1	1/1	1/1	1/1	1/0
NC_037342.1:47316678-47316940(+)	BosSINEL	35.98	64.02	380	676	16	348	164	8	1/0	1/0	0/0	1/0	1/0	1/0	1/0	1/0	1/0	1/0	1/0	1/0	1/0	1/0	0/0	0/0	0/0	0/0	0/0	1/0	1/0	0/0	0/0	1/0	1/0	0/0	1/0	0/0	0/0	0/0	1/0	0/0	1/0	1/0	1/0	1/0	1/0	1/0	1/0	1/0
NC_037342.1:48357075-48357191(-)	BosSINEL	50.28	49.72	532	526	6	520	3	7	1/0	1/0	1/0	1/0	1/0	1/0	1/0	1/0	1/0	1/0	1/0	1/0	1/0	1/0	1/0	1/0	1/0	1/0	1/0	1/0	1/0	1/0	1/0	1/0	1/0	1/0	1/0	1/0	1/0	1/0	1/0	1/0	1/0	1/0	1/0	1/0	1/0	1/0	1/0	1/0
NC_037342.1:48383370-48383645(+)	BosSINEL	49.91	50.09	529	531	7	515	8	6	1/0	1/0	1/0	1/0	1/0	1/0	1/0	1/0	1/0	1/0	1/0	1/0	1/0	1/0	1/0	1/0	1/0	1/0	1/0	1/0	1/0	1/0	1/0	1/0	1/0	1/0	1/0	1/0	1/0	1/0	1/0	1/0	1/0	1/0	1/0	1/0	1/0	1/0	1/0	1/0
NC_037342.1:48506634-48506857(+)	BosSINEL	61.44	38.56	650	408	122	406	1	7	1/0	1/0	1/1	1/1	1/0	1/0	1/0	1/0	1/0	1/0	1/0	1/0	1/0	1/1	1/0	1/0	1/0	1/0	1/0	1/1	1/0	1/0	1/0	1/0	1/0	1/0	1/0	1/0	1/0	1/0	1/1	1/1	1/0	1/1	1/0	1/0	1/0	1/0	1/0	1/0
NC_037342.1:48653881-48654140(-)	BosSINEL	51.23	48.77	540	514	15	510	2	9	1/0	1/0	1/0	1/0	1/0	1/1	1/0	1/0	1/0	1/0	1/0	1/0	1/0	1/0	1/0	1/0	1/0	1/0	1/0	1/0	1/0	1/0	1/0	1/0	1/0	1/0	1/0	1/0	1/0	1/0	1/0	1/0	1/0	1/0	1/0	1/0	1/0	1/0	1/0	1/0
NC_037342.1:48827386-48827662(-)	BosSINEL	47.75	52.25	509	557	4	501	28	3	1/0	1/0	1/0	1/0	1/0	1/0	1/0	1/0	1/0	1/0	1/0	1/0	1/0	1/0	1/0	1/0	1/0	1/0	1/0	1/0	1/0	1/0	1/0	1/0	1/0	1/0	1/0	1/0	1/0	1/0	0/0	1/0	1/0	1/0	1/0	1/0	1/0	1/0	1/0	1/0
NC_037342.1:48854742-48855016(+)	BosSINEL	49.34	50.66	523	537	1	521	8	6	1/0	1/0	1/0	1/0	1/0	1/0	1/0	1/0	1/0	1/0	1/0	1/0	1/0	1/0	1/0	1/0	1/0	1/0	1/0	1/0	1/0	1/0	1/0	1/0	1/0	1/0	1/0	1/0	1/0	1/0	1/0	1/0	1/0	1/0	1/0	1/0	1/0	1/0	1/0	1/0
NC_037342.1:48871658-48871932(-)	BosSINEL	50.28	49.72	533	527	8	517	5	6	1/0	1/0	1/0	1/0	1/0	1/0	1/0	1/0	1/0	1/0	1/0	1/0	1/0	1/0	1/0	1/0	1/0	1/0	1/0	1/0	1/0	1/0	1/0	1/0	1/0	1/0	1/0	1/0	1/0	1/0	1/0	1/0	1/0	1/0	1/0	1/0	1/0	1/0	1/0	1/0
NC_037342.1:48976335-48976602(-)	BosSINEL	77.17	22.83	818	242	290	238	2	6	1/0	1/1	1/1	1/1	1/0	1/0	1/1	1/1	1/1	1/1	1/1	1/0	1/0	1/0	1/1	1/1	1/1	1/0	1/1	1/1	1/1	1/1	1/0	1/1	1/0	1/0	1/0	1/0	1/1	1/0	1/0	1/1	1/0	1/0	1/1	1/1	1/1	1/0	1/0	1/0
NC_037342.1:49235093-49235353(+)	BosSINEL	76.78	23.22	800	242	287	226	8	15	1/1	1/1	1/1	1/1	1/0	1/1	1/0	1/0	1/1	1/1	1/1	1/1	1/1	1/0	1/0	1/1	1/1	1/0	1/0	1/0	1/1	1/0	1/0	1/1	1/1	0/0	1/0	1/0	1/1	1/1	1/0	1/1	1/0	1/0	1/0	1/1	1/0	1/1	1/1	1/0
NC_037342.1:49256026-49256304(-)	BosSINEL	62.05	37.95	649	397	126	397	0	13	1/0	1/0	1/0	1/0	1/1	1/1	1/1	1/1	1/0	1/0	1/0	1/0	1/0	1/0	1/0	1/0	1/0	1/1	1/0	1/0	1/0	1/0	1/1	1/0	1/0	1/0	1/0	1/0	1/0	1/0	1/1	1/0	1/0	1/1	1/1	1/1	1/0	1/0	1/0	1/0
NC_037342.1:49267816-49268092(-)	BosSINEL	59.56	40.44	629	427	103	423	2	8	1/0	1/0	1/0	1/0	1/0	1/0	1/0	1/1	1/0	1/0	1/0	1/0	1/1	1/1	1/0	1/0	1/0	1/0	1/0	1/0	1/0	1/0	1/1	1/1	1/0	1/0	1/0	1/0	1/0	1/0	1/0	1/0	1/0	1/0	1/1	1/0	1/0	1/0	1/0	1/0
NC_037342.1:49564406-49564665(+)	BosSINEL	79.06	20.94	827	219	311	205	7	13	1/0	1/1	1/0	1/0	1/1	1/1	1/1	1/1	1/1	1/1	1/1	1/1	1/1	1/1	1/1	1/0	1/0	1/1	1/0	1/1	1/0	1/0	1/1	1/1	1/1	1/1	1/0	1/1	1/1	1/1	1/1	1/1	1/0	1/0	1/1	1/1	1/1	1/0	1/1	1/1
NC_037342.1:49791573-49791846(+)	BosSINEL	50.38	49.62	533	525	11	511	7	7	1/0	1/0	1/0	1/0	1/0	1/0	1/0	1/0	1/0	1/0	1/0	1/0	1/0	1/0	1/0	1/0	1/0	1/0	1/0	1/0	1/0	1/0	1/0	1/0	1/0	1/0	1/0	1/0	1/0	1/0	1/0	1/0	1/0	1/0	1/0	1/0	1/0	1/0	1/0	1/0
NC_037342.1:49833482-49833615(-)	BosSINEL	49.24	50.76	520	536	19	482	27	8	1/0	1/0	1/0	1/0	1/0	1/0	1/0	1/0	1/0	1/0	1/0	1/0	1/0	1/0	1/0	1/0	1/0	1/0	1/0	1/0	1/0	1/0	1/0	1/0	1/0	1/0	1/0	1/0	1/0	1/0	1/0	1/0	1/0	1/0	1/0	1/0	1/0	1/0	1/0	1/0
NC_037342.1:49851264-49851508(-)	BosSINEL	23.99	76.01	249	789	6	237	276	17	1/0	0/0	0/0	0/0	0/0	1/0	0/0	0/0	0/0	NA	0/0	1/0	1/0	1/0	0/0	0/0	0/0	1/0	0/0	0/0	0/0	0/0	1/0	0/0	1/0	1/0	1/0	1/0	0/0	1/0	1/0	0/0	1/0	1/0	0/0	0/0	0/0	1/0	1/0	1/0
NC_037342.1:50079782-50080051(-)	BosSINEL	50.57	49.43	532	520	9	514	3	10	1/0	1/0	1/0	1/0	1/0	1/0	1/0	1/0	1/0	1/0	1/0	1/0	1/0	1/0	1/0	1/0	1/0	1/0	1/0	1/0	1/0	1/0	1/0	1/0	1/0	1/0	1/0	1/0	1/0	1/0	1/0	1/0	1/0	1/0	1/0	1/0	1/0	1/0	1/0	1/0
NC_037342.1:50145234-50145537(+)	BosSINEL	49.81	50.19	527	531	8	511	10	7	1/0	1/0	1/0	1/0	1/0	1/0	1/0	1/0	1/0	1/0	1/0	1/0	1/0	1/0	1/0	1/0	1/0	1/0	1/0	1/0	1/0	1/0	1/0	1/0	1/0	1/0	1/0	1/0	1/0	1/0	1/0	1/0	1/0	1/0	1/0	1/0	1/0	1/0	1/0	1/0
NC_037342.1:50794397-50794667(+)	BosSINEL	74.71	25.29	783	265	260	263	1	12	1/1	1/1	1/1	1/1	1/0	1/0	1/0	1/0	1/0	1/1	1/0	1/1	1/0	1/0	1/0	1/1	1/1	1/1	1/0	1/1	1/0	1/0	1/0	1/0	1/0	1/1	1/1	1/0	1/0	1/0	1/0	1/1	1/0	1/1	1/0	1/0	1/0	1/1	1/0	1/0
NC_037342.1:50853489-50853601(-)	BosSINEL	48.3	51.7	512	548	0	512	18	6	1/0	1/0	1/0	1/0	1/0	1/0	1/0	1/0	1/0	1/0	1/0	1/0	1/0	1/0	1/0	1/0	1/0	1/0	1/0	1/0	1/0	1/0	1/0	1/0	1/0	1/0	1/0	1/0	1/0	1/0	1/0	1/0	1/0	1/0	1/0	1/0	1/0	1/0	1/0	1/0
NC_037342.1:50863237-50863500(-)	BosSINEL	32.58	67.42	331	685	18	295	195	28	0/0	1/0	1/0	1/0	1/0	1/0	1/0	1/0	1/0	1/0	1/0	0/0	1/0	1/0	1/1	1/0	1/0	1/0	1/0	1/0	1/0	1/0	1/0	1/0	NA	0/0	0/0	1/0	1/0	0/0	0/0	1/0	0/0	0/0	1/0	1/0	1/0	0/0	1/0	1/0
NC_037342.1:50890604-50890880(+)	BosSINEL	49.15	50.85	521	539	0	521	9	6	1/0	1/0	1/0	1/0	1/0	1/0	1/0	1/0	1/0	1/0	1/0	1/0	1/0	1/0	1/0	1/0	1/0	1/0	1/0	1/0	1/0	1/0	1/0	1/0	1/0	1/0	1/0	1/0	1/0	1/0	1/0	1/0	1/0	1/0	1/0	1/0	1/0	1/0	1/0	1/0
NC_037342.1:50914178-50914455(-)	BosSINEL	53.71	46.29	565	487	52	461	13	10	1/0	1/0	1/0	1/0	1/0	1/0	1/0	1/0	1/0	1/0	1/0	1/0	1/0	1/0	1/0	1/0	1/0	1/0	1/0	1/0	1/0	1/0	1/0	1/0	1/0	1/0	1/0	1/0	1/0	0/0	1/1	1/0	1/1	1/1	1/0	1/0	1/0	1/0	1/0	1/0
NC_037342.1:50926519-50926651(+)	BosSINEL	42.51	57.49	454	614	0	454	80	2	1/0	1/0	1/0	1/0	1/0	1/0	1/0	1/0	0/0	1/0	1/0	1/0	1/0	1/0	1/0	1/0	0/0	1/0	1/0	1/0	1/0	1/0	1/0	1/0	1/0	1/0	1/0	1/0	1/0	1/0	1/0	1/0	1/0	1/0	1/0	1/0	1/0	1/0	1/0	1/0
NC_037342.1:51405211-51405487(+)	BosSINEL	45.71	54.29	490	582	0	490	46	0	1/0	1/0	1/0	1/0	1/0	1/0	1/0	1/0	1/0	1/0	1/0	1/0	1/0	1/0	1/0	0/0	1/0	1/0	1/0	1/0	1/0	1/0	0/0	1/0	1/0	1/0	1/0	1/0	1/0	1/0	1/0	1/0	1/0	1/0	1/0	0/0	1/0	1/0	1/0	0/0
NC_037342.1:51421130-51421390(-)	BosSINEL	45.94	54.06	487	573	6	475	49	6	1/0	1/0	1/0	1/0	1/0	1/0	1/0	1/0	0/0	1/0	0/0	1/0	1/0	1/0	1/0	1/0	0/0	1/0	1/0	1/0	1/0	1/0	0/0	1/0	1/0	1/0	1/0	1/0	1/0	1/0	1/0	1/0	1/0	1/0	1/0	0/0	1/0	1/0	1/0	0/0
NC_037342.1:51447080-51447290(+)	BosSINEL	48.41	51.59	519	553	0	519	17	0	1/0	1/0	1/0	1/0	1/0	1/0	1/0	1/0	1/0	1/0	1/0	1/0	1/0	1/0	1/0	1/0	1/0	1/0	1/0	1/0	1/0	1/0	1/0	1/0	1/0	1/0	1/0	1/0	1/0	1/0	1/0	1/0	1/0	1/0	1/0	1/0	1/0	1/0	1/0	1/0
NC_037342.1:51513819-51513951(-)	BosSINEL	52.36	47.64	554	504	32	490	7	7	1/0	1/0	1/0	1/0	1/0	1/0	1/0	1/0	1/0	1/0	1/0	1/0	1/0	1/0	1/0	1/0	1/0	1/0	1/0	1/0	1/0	1/0	1/0	1/0	1/0	1/0	1/0	1/0	1/0	1/0	1/0	1/0	1/0	1/0	1/0	1/0	1/0	1/0	1/0	1/0
NC_037342.1:52028168-52028443(+)	BosSINEL	58.24	41.76	615	441	91	433	4	8	1/0	1/0	1/0	1/0	1/0	1/0	1/0	1/0	1/0	1/0	1/0	1/0	1/0	1/0	1/0	1/0	1/0	1/0	1/0	1/0	1/0	1/1	1/0	1/0	1/0	1/0	1/0	1/0	1/0	1/1	1/0	1/0	1/0	1/0	1/0	1/0	1/0	1/1	1/0	1/0
NC_037342.1:52700118-52700393(-)	BosSINEL	73.53	26.47	778	280	254	270	5	7	1/1	1/1	1/1	1/1	1/1	1/0	1/1	1/0	1/0	1/1	1/1	1/0	1/1	1/1	1/1	1/0	1/0	1/0	1/1	1/0	1/0	1/1	1/0	1/0	1/0	1/1	1/1	1/0	1/0	1/1	1/0	1/0	1/1	1/1	1/0	1/0	1/1	1/0	1/1	1/0
NC_037342.1:52958739-52959009(+)	BosSINEL	49.63	50.37	530	538	3	524	7	2	1/0	1/0	1/0	1/0	1/0	1/0	1/0	1/0	1/0	1/0	1/0	1/0	1/0	1/0	1/0	1/0	1/0	1/0	1/0	1/0	1/0	1/0	1/0	1/0	1/0	1/0	1/0	1/0	1/0	1/0	1/0	1/0	1/0	1/0	1/0	1/0	1/0	1/0	1/0	1/0
NC_037342.1:52960203-52960478(+)	BosSINEL	49.06	50.94	524	544	0	524	10	2	1/0	1/0	1/0	1/0	1/0	1/0	1/0	1/0	1/0	1/0	1/0	1/0	1/0	1/0	1/0	1/0	1/0	1/0	1/0	1/0	1/0	1/0	1/0	1/0	1/0	1/0	1/0	1/0	1/0	1/0	1/0	1/0	1/0	1/0	1/0	1/0	1/0	1/0	1/0	1/0
NC_037342.1:53695635-53695878(+)	BosSINEL	48.69	51.31	522	550	0	522	14	0	1/0	1/0	1/0	1/0	1/0	1/0	1/0	1/0	1/0	1/0	1/0	1/0	1/0	1/0	1/0	1/0	1/0	1/0	1/0	1/0	1/0	1/0	1/0	1/0	1/0	1/0	1/0	1/0	1/0	1/0	1/0	1/0	1/0	1/0	1/0	1/0	1/0	1/0	1/0	1/0
NC_037342.1:53851404-53851679(-)	BosSINEL	85.98	14.02	908	148	381	146	1	8	1/1	1/1	1/1	1/1	1/1	1/1	1/1	1/1	1/1	1/1	1/0	1/1	1/1	1/1	1/1	1/1	1/1	1/1	1/0	1/1	1/1	1/0	1/0	1/0	1/1	1/0	1/0	1/1	1/0	1/0	1/1	1/0	1/0	1/1	1/1	1/1	1/0	1/0	1/1	1/1
NC_037342.1:54858780-54859035(+)	BosSINEL	49.06	50.94	523	543	0	523	10	3	1/0	1/0	1/0	1/0	1/0	1/0	1/0	1/0	1/0	1/0	1/0	1/0	1/0	1/0	1/0	1/0	1/0	1/0	1/0	1/0	1/0	1/0	1/0	1/0	1/0	1/0	1/0	1/0	1/0	1/0	1/0	1/0	1/0	1/0	1/0	1/0	1/0	1/0	1/0	1/0
NC_037342.1:54911266-54911399(+)	BosSINEL	48.49	51.51	514	546	1	512	17	6	1/0	1/0	1/0	1/0	1/0	1/0	1/0	1/0	1/0	1/0	1/0	1/0	1/0	1/0	1/0	1/0	1/0	1/0	1/0	1/0	1/0	1/0	1/0	1/0	1/0	1/0	1/0	1/0	1/0	1/0	1/0	1/0	1/0	1/0	1/0	1/0	1/0	1/0	1/0	1/0
NC_037342.1:55200060-55200332(+)	BosSINEL	49.44	50.56	530	542	0	530	6	0	1/0	1/0	1/0	1/0	1/0	1/0	1/0	1/0	1/0	1/0	1/0	1/0	1/0	1/0	1/0	1/0	1/0	1/0	1/0	1/0	1/0	1/0	1/0	1/0	1/0	1/0	1/0	1/0	1/0	1/0	1/0	1/0	1/0	1/0	1/0	1/0	1/0	1/0	1/0	1/0
NC_037342.1:56436460-56436717(+)	BosSINEL	35.89	64.11	374	668	13	348	160	15	1/0	1/0	0/0	0/0	1/0	1/0	1/0	1/0	1/0	0/0	1/0	1/0	1/0	0/0	1/0	0/0	0/0	1/0	1/0	1/0	0/0	1/0	1/0	0/0	1/0	1/0	1/0	0/0	1/0	1/0	0/0	0/0	1/0	1/0	1/0	1/0	1/1	1/0	1/0	0/0
NC_037342.1:56872068-56872340(-)	BosSINEL	49.72	50.28	527	533	0	527	3	6	1/0	1/0	1/0	1/0	1/0	1/0	1/0	1/0	1/0	1/0	1/0	1/0	1/0	1/0	1/0	1/0	1/0	1/0	1/0	1/0	1/0	1/0	1/0	1/0	1/0	1/0	1/0	1/0	1/0	1/0	1/0	1/0	1/0	1/0	1/0	1/0	1/0	1/0	1/0	1/0
NC_037342.1:56931359-56931634(+)	BosSINEL	58.96	41.04	625	435	98	429	3	6	1/0	1/0	1/1	1/0	1/0	1/0	1/0	1/0	1/0	1/0	1/0	1/0	1/0	1/0	1/0	1/0	1/0	1/0	1/0	1/0	1/0	1/0	1/0	1/0	1/0	1/0	1/0	1/0	1/0	1/0	1/0	1/0	1/0	1/0	1/0	1/0	1/0	1/0	1/0	1/0
NC_037342.1:57267221-57267496(+)	BosSINEL	49.35	50.65	529	543	0	529	7	0	1/0	1/0	1/0	1/0	1/0	1/0	1/0	1/0	1/0	1/0	1/0	1/0	1/0	1/0	1/0	1/0	1/0	1/0	1/0	1/0	1/0	1/0	1/0	1/0	1/0	1/0	1/0	1/0	1/0	1/0	1/0	1/0	1/0	1/0	1/0	1/0	1/0	1/0	1/0	1/0
NC_037342.1:57486128-57486255(-)	BosSINEL	49.25	50.75	523	539	0	523	8	5	1/0	1/0	1/0	1/0	1/0	1/0	1/0	1/0	1/0	1/0	1/0	1/0	1/0	1/0	1/0	1/0	1/0	1/0	1/0	1/0	1/0	1/0	1/0	1/0	1/0	1/0	1/0	1/0	1/0	1/0	1/0	1/0	1/0	1/0	1/0	1/0	1/0	1/0	1/0	1/0
NC_037342.1:57755070-57755327(+)	BosSINEL	49.07	50.93	526	546	0	526	10	0	1/0	1/0	1/0	1/0	1/0	1/0	1/0	1/0	1/0	1/0	1/0	1/0	1/0	1/0	1/0	1/0	1/0	1/0	1/0	1/0	1/0	1/0	1/0	1/0	1/0	1/0	1/0	1/0	1/0	1/0	1/0	1/0	1/0	1/0	1/0	1/0	1/0	1/0	1/0	1/0
NC_037342.1:58563475-58563749(-)	BosSINEL	50.47	49.53	535	525	17	501	12	6	1/0	1/0	1/0	1/0	1/0	1/0	1/0	1/0	1/0	1/0	1/0	1/0	1/0	1/0	1/0	1/0	1/0	1/0	1/0	1/0	1/0	1/0	1/0	1/0	1/0	1/0	1/0	1/0	1/0	1/0	1/0	1/0	1/0	1/0	1/0	1/0	1/0	1/0	1/0	1/0
NC_037342.1:58741531-58741782(+)	BosSINEL	85.9	14.1	902	148	378	146	1	11	1/1	1/1	1/1	1/1	1/1	1/0	1/1	1/1	1/1	1/1	1/1	1/1	1/1	1/1	1/0	1/0	1/0	1/0	1/1	1/1	1/1	1/0	1/1	1/0	1/1	1/1	1/1	1/0	1/1	1/1	1/0	1/1	1/0	1/1	1/1	1/1	1/0	1/1	1/1	1/0
NC_037342.1:59491358-59491633(-)	BosSINEL	86.42	13.58	904	142	382	140	1	13	1/0	1/0	1/0	1/0	1/1	1/1	1/1	1/1	1/1	1/1	1/0	1/0	1/1	1/1	1/1	1/0	1/0	1/1	1/0	1/0	1/1	1/1	1/0	1/1	1/1	1/1	1/1	1/1	1/0	1/1	1/1	1/1	1/1	1/1	1/0	1/1	1/0	1/0	1/1	1/1
NC_037342.1:60214560-60214830(-)	BosSINEL	45.33	54.67	485	585	0	485	50	1	1/0	1/0	1/0	1/0	1/0	1/0	1/0	1/0	1/0	1/0	1/0	1/0	1/0	1/0	1/0	1/0	1/0	1/0	1/0	1/0	1/0	1/0	1/0	1/0	1/0	1/0	1/0	1/0	1/0	1/0	1/0	1/0	1/0	1/0	1/0	1/0	1/0	1/0	0/0	1/0
NC_037342.1:60671768-60672043(+)	BosSINEL	49.53	50.47	526	536	0	526	5	5	1/0	1/0	1/0	1/0	1/0	1/0	1/0	1/0	1/0	1/0	1/0	1/0	1/0	1/0	1/0	1/0	1/0	1/0	1/0	1/0	1/0	1/0	1/0	1/0	1/0	1/0	1/0	1/0	1/0	1/0	1/0	1/0	1/0	1/0	1/0	1/0	1/0	1/0	1/0	1/0
NC_037342.1:61067290-61067565(-)	BosSINEL	64.72	35.28	686	374	166	354	10	6	1/0	1/1	1/1	1/0	1/0	1/0	1/0	1/0	1/0	1/0	1/0	1/0	1/0	1/0	1/0	1/0	1/0	1/0	1/0	1/0	1/0	1/1	1/0	1/0	1/0	1/0	1/0	1/0	1/0	1/0	1/0	1/0	1/0	1/0	1/0	1/0	1/0	1/0	1/0	1/0
NC_037342.1:61069109-61069243(+)	BosSINEL	66.99	33.01	698	344	182	334	5	15	1/0	1/0	1/0	1/0	1/0	1/1	1/0	1/1	1/1	1/1	1/0	1/1	1/1	1/0	1/1	1/0	1/0	1/1	1/1	1/1	1/0	1/1	1/1	1/1	1/0	1/0	1/0	1/0	1/1	1/1	1/1	1/1	1/1	1/1	1/1	1/1	1/0	1/0	1/1	1/1
NC_037342.1:61265015-61265273(+)	BosSINEL	51.23	48.77	542	516	20	502	7	7	1/0	1/0	1/0	1/0	1/0	1/0	1/0	1/0	1/0	1/0	1/0	1/0	1/1	0/0	1/0	1/0	1/0	1/0	1/0	1/0	1/0	1/0	1/0	1/0	1/0	1/0	1/0	1/0	1/0	1/0	1/0	1/0	1/0	1/0	1/0	1/0	1/1	1/0	1/0	1/0
NC_037342.1:61750646-61750919(-)	BosSINEL	47.47	52.53	470	520	113	244	138	41	1/0	0/0	0/0	0/0	1/1	0/0	NA	1/0	0/0	1/0	0/0	1/1	NA	1/0	1/0	NA	1/1	1/0	1/1	1/0	1/1	1/0	1/1	NA	1/1	1/1	1/1	1/1	0/0	1/1	1/1	NA	1/0	1/0	NA	1/1	1/0	1/1	1/1	1/0
NC_037342.1:62151721-62151988(-)	BosSINEL	49.35	50.65	528	542	0	528	7	1	1/0	1/0	1/0	1/0	1/0	1/0	1/0	1/0	1/0	1/0	1/0	1/0	1/0	1/0	1/0	1/0	1/0	1/0	1/0	1/0	1/0	1/0	1/0	1/0	1/0	1/0	1/0	1/0	1/0	1/0	1/0	1/0	1/0	1/0	1/0	1/0	1/0	1/0	1/0	1/0
NC_037342.1:66345752-66346020(+)	BosSINEL	60.69	39.31	636	412	194	248	82	12	0/0	0/0	1/0	1/0	1/0	1/0	1/0	1/1	0/0	1/0	1/0	1/0	0/0	1/1	1/0	1/1	0/0	1/0	1/1	1/0	0/0	1/0	1/0	1/1	1/1	1/0	1/0	1/1	1/0	1/0	1/0	1/1	1/0	1/1	1/0	1/1	1/0	1/0	1/1	1/1
NC_037342.1:70536079-70536351(+)	BosSINEL	81.06	18.94	856	200	331	194	3	8	1/0	1/0	1/0	1/0	1/1	1/0	1/1	1/0	1/1	1/1	1/1	1/1	1/1	1/0	1/0	1/1	1/1	1/1	1/0	1/1	1/1	1/1	1/1	1/1	1/1	1/1	1/1	1/0	1/1	1/1	1/0	1/0	1/1	1/0	1/1	1/0	1/1	1/1	1/1	1/1
NC_037342.1:71081967-71082242(-)	BosSINEL	48.97	51.03	525	547	0	525	11	0	1/0	1/0	1/0	1/0	1/0	1/0	1/0	1/0	1/0	1/0	1/0	1/0	1/0	1/0	1/0	1/0	1/0	1/0	1/0	1/0	1/0	1/0	1/0	1/0	1/0	1/0	1/0	1/0	1/0	1/0	1/0	1/0	1/0	1/0	1/0	1/0	1/0	1/0	1/0	1/0
NC_037342.1:71929862-71930132(-)	BosSINEL	48.69	51.31	522	550	0	522	14	0	1/0	1/0	1/0	1/0	1/0	1/0	1/0	1/0	1/0	1/0	1/0	1/0	1/0	1/0	1/0	1/0	1/0	1/0	1/0	1/0	1/0	1/0	1/0	1/0	1/0	1/0	1/0	1/0	1/0	1/0	1/0	1/0	1/0	1/0	1/0	1/0	1/0	1/0	1/0	1/0
NC_037342.1:72041327-72041458(-)	BosSINEL	64.54	35.46	679	373	156	367	3	10	1/1	1/1	1/1	1/0	1/1	1/0	1/0	1/0	1/0	1/0	1/0	1/0	1/0	1/0	1/0	1/0	1/0	1/0	1/0	1/0	1/0	1/0	1/0	1/0	1/0	1/0	1/1	1/0	1/0	1/1	1/0	1/0	1/0	1/0	1/0	1/0	1/0	1/0	1/0	1/0
NC_037342.1:73131941-73131985(-)	BosSINEL	68.16	31.84	717	335	192	333	1	10	1/0	1/0	1/0	1/0	1/0	1/0	1/1	1/1	1/0	1/1	1/0	1/1	1/1	1/0	1/1	1/1	1/1	1/1	1/0	1/0	1/0	1/0	1/0	1/1	1/0	1/0	1/0	1/1	1/0	1/1	1/0	1/0	1/0	1/1	1/1	1/1	1/0	1/0	1/1	1/0
NC_037342.1:74037040-74037307(-)	BosSINEL	49.15	50.85	519	537	7	505	16	8	1/0	1/0	1/0	1/0	1/0	1/0	1/0	1/0	1/0	1/0	1/0	1/0	1/0	1/0	1/0	1/0	1/0	1/0	1/0	1/0	1/0	1/0	1/0	1/0	1/0	1/0	1/0	1/0	1/0	1/0	1/0	1/0	1/0	1/0	1/0	1/0	1/0	1/0	1/0	1/0
NC_037342.1:74074699-74074839(-)	BosSINEL	55.38	44.62	587	473	57	473	0	6	1/0	1/0	1/0	1/0	1/0	1/0	1/1	1/0	1/0	1/0	1/0	1/0	1/0	1/1	1/0	1/0	1/0	1/0	1/1	1/0	1/0	1/1	1/0	1/0	1/0	1/0	1/0	1/0	1/0	1/0	1/0	1/0	1/0	1/0	1/1	1/0	1/0	1/0	1/0	1/0
NC_037342.1:78396840-78397115(+)	BosSINEL	49.34	50.66	523	537	0	523	7	6	1/0	1/0	1/0	1/0	1/0	1/0	1/0	1/0	1/0	1/0	1/0	1/0	1/0	1/0	1/0	1/0	1/0	1/0	1/0	1/0	1/0	1/0	1/0	1/0	1/0	1/0	1/0	1/0	1/0	1/0	1/0	1/0	1/0	1/0	1/0	1/0	1/0	1/0	1/0	1/0
NC_037342.1:78439109-78439241(-)	BosSINEL	48.5	51.5	519	551	0	519	16	1	1/0	1/0	1/0	1/0	1/0	1/0	1/0	1/0	1/0	1/0	1/0	1/0	1/0	1/0	1/0	1/0	1/0	1/0	1/0	1/0	1/0	1/0	1/0	1/0	1/0	1/0	1/0	1/0	1/0	1/0	1/0	1/0	1/0	1/0	1/0	1/0	1/0	1/0	1/0	1/0
NC_037342.1:78463449-78463724(-)	BosSINEL	42.4	57.6	435	591	14	407	92	23	1/0	1/0	1/0	0/0	1/0	1/0	1/0	1/0	0/0	0/0	1/0	1/0	1/0	0/0	0/0	1/0	1/0	0/0	0/0	0/0	1/0	1/0	0/0	1/0	1/0	0/0	1/0	1/0	0/0	0/0	1/0	1/0	1/0	1/0	1/0	1/0	1/0	0/0	1/0	1/0
NC_037342.1:78590181-78590453(-)	BosSINEL	51.04	48.96	539	517	26	487	15	8	1/0	1/0	1/0	1/0	1/0	1/0	1/0	1/0	1/0	1/0	1/0	1/0	1/0	1/0	1/0	1/0	1/0	1/0	1/0	1/0	1/0	1/0	1/0	1/0	1/0	1/0	1/0	1/0	1/0	1/0	1/0	1/0	1/0	1/0	1/0	1/0	1/0	1/0	1/0	1/0
NC_037342.1:78697305-78697562(-)	BosSINEL	70	30	735	315	210	315	0	11	1/0	1/0	1/0	1/0	1/1	1/1	1/1	1/0	1/1	1/1	1/0	1/1	1/0	1/0	1/1	1/0	1/0	1/1	1/1	1/1	1/1	1/1	1/1	1/1	1/1	1/1	1/1	1/1	1/0	1/0	1/0	1/0	1/1	1/1	1/1	1/1	1/1	1/0	1/0	1/0
NC_037342.1:79275653-79275928(-)	BosSINEL	48.21	51.79	511	549	6	499	25	6	0/0	1/0	1/0	1/0	1/0	1/0	1/0	1/0	1/0	1/0	1/0	1/0	1/0	1/0	1/0	1/0	1/0	1/0	1/0	1/0	1/0	1/0	1/0	1/0	1/0	1/0	1/0	1/0	1/0	1/0	1/0	1/0	1/0	1/0	1/0	1/0	1/0	1/0	1/0	1/0
NC_037342.1:79502161-79502434(+)	BosSINEL	47.06	52.94	496	558	2	492	33	9	0/0	1/0	1/0	1/0	1/0	1/0	1/0	1/0	1/0	0/0	1/0	1/0	1/0	1/0	1/0	1/0	1/0	1/0	1/0	1/0	1/0	1/0	1/0	1/0	1/0	1/0	1/0	1/0	1/0	1/0	1/0	1/0	1/0	1/0	1/0	1/0	1/0	1/0	1/0	1/0
NC_037342.1:79758913-79759188(+)	BosSINEL	48.39	51.61	512	546	2	508	19	7	1/0	1/0	1/0	1/0	1/0	1/0	1/0	1/0	1/0	1/0	1/0	1/0	1/0	1/0	1/0	1/0	1/0	1/0	1/0	1/0	1/0	1/0	1/0	1/0	1/0	1/0	1/0	1/0	1/0	1/0	1/0	1/0	1/0	1/0	1/0	1/0	1/0	1/0	1/0	1/0
NC_037342.1:79903593-79903867(-)	BosSINEL	66.57	33.43	703	353	179	345	4	8	1/1	1/1	1/1	1/0	1/0	1/0	1/0	1/0	1/0	1/1	1/0	1/0	1/0	1/0	1/0	1/0	1/0	1/0	1/0	1/1	1/1	1/0	1/0	1/0	1/0	1/0	1/0	1/0	1/0	1/0	1/0	1/1	1/0	1/1	1/0	1/0	1/0	1/0	1/0	1/0
NC_037342.1:79950196-79950445(-)	BosSINEL	49.05	50.95	519	539	1	517	11	7	1/0	1/0	1/0	1/0	1/0	1/0	1/0	1/0	1/0	1/0	1/0	1/0	1/0	1/0	1/0	1/0	1/0	1/0	1/0	1/0	1/0	1/0	1/0	1/0	1/0	1/0	1/0	1/0	1/0	1/0	1/0	1/0	1/0	1/0	1/0	1/0	1/0	1/0	1/0	1/0
NC_037342.1:80100587-80100848(+)	BosSINEL	50.85	49.15	539	521	12	515	3	6	1/0	1/0	1/0	1/0	1/0	1/0	1/0	1/0	1/0	1/0	1/0	1/0	1/0	1/0	1/0	1/0	1/0	1/0	1/0	1/0	1/0	1/0	1/0	1/0	1/0	1/0	1/0	1/0	1/0	1/0	1/0	1/0	1/0	1/0	1/0	1/0	1/0	1/0	1/0	1/0
NC_037342.1:80104636-80104914(+)	BosSINEL	54.34	45.66	576	484	50	476	4	6	1/0	1/0	1/0	1/0	1/0	1/0	1/0	1/0	1/0	1/0	1/0	1/0	1/0	1/0	1/0	1/0	1/0	1/0	1/0	1/0	1/0	1/0	1/0	1/0	1/0	1/0	1/0	1/0	1/1	1/0	1/0	1/0	1/0	1/0	1/0	1/0	1/0	1/0	1/0	1/0
NC_037342.1:81498419-81498692(+)	BosSINEL	52.28	47.72	550	502	32	486	8	10	1/0	1/0	1/0	1/0	1/0	1/0	1/0	1/0	1/0	1/0	1/0	1/0	1/0	1/0	1/0	1/0	1/0	1/0	1/0	1/0	1/0	1/0	1/0	1/0	1/0	1/0	1/0	1/0	1/0	1/0	1/0	1/0	1/0	1/0	1/0	1/0	1/0	1/0	1/0	1/0
NC_037342.1:81694183-81694459(+)	BosSINEL	51.04	48.96	538	516	18	502	7	9	1/0	1/0	1/0	1/0	1/0	1/0	1/0	1/0	1/0	1/0	1/0	1/0	1/0	1/1	1/0	1/0	1/0	1/0	1/0	1/0	1/0	1/0	1/0	1/0	1/0	1/0	1/0	1/0	1/0	1/0	1/0	1/1	1/0	1/0	1/0	1/0	1/0	1/0	1/0	1/0
NC_037342.1:81701926-81702052(-)	BosSINEL	49.43	50.57	523	535	5	513	11	7	1/0	1/0	1/0	1/0	1/0	1/0	1/0	1/0	1/0	1/0	1/0	1/0	1/0	1/0	1/0	1/0	1/0	1/0	1/0	1/0	1/0	1/0	1/0	1/0	1/0	1/0	1/0	1/0	1/0	1/0	1/0	1/0	1/0	1/0	1/0	1/0	1/0	1/0	1/0	1/0
NC_037342.1:81768441-81768553(-)	BosSINEL	49.81	50.19	528	532	4	520	6	6	1/0	1/0	1/0	1/0	1/0	1/0	1/0	1/0	1/0	1/0	1/0	1/0	1/0	1/0	1/0	1/0	1/0	1/0	1/0	1/0	1/0	1/0	1/0	1/0	1/0	1/0	1/0	1/0	1/0	1/0	1/0	1/0	1/0	1/0	1/0	1/0	1/0	1/0	1/0	1/0
NC_037342.1:82709319-82709594(-)	BosSINEL	71.36	28.64	725	291	230	265	13	28	1/0	1/0	1/0	1/0	1/1	1/1	1/1	1/1	NA	1/0	1/0	1/1	1/1	1/1	1/1	1/1	1/1	1/1	1/1	1/1	1/1	1/0	1/1	1/1	1/1	1/1	1/1	1/0	NA	1/0	1/0	1/1	1/1	1/1	1/1	1/1	1/1	1/1	1/0	1/0
NC_037342.1:82892419-82892486(+)	BosSINEL	49.07	50.93	526	546	0	526	10	0	1/0	1/0	1/0	1/0	1/0	1/0	1/0	1/0	1/0	1/0	1/0	1/0	1/0	1/0	1/0	1/0	1/0	1/0	1/0	1/0	1/0	1/0	1/0	1/0	1/0	1/0	1/0	1/0	1/0	1/0	1/0	1/0	1/0	1/0	1/0	1/0	1/0	1/0	1/0	1/0
NC_037342.1:83545042-83545314(-)	BosSINEL	49.35	50.65	528	542	0	528	7	1	1/0	1/0	1/0	1/0	1/0	1/0	1/0	1/0	1/0	1/0	1/0	1/0	1/0	1/0	1/0	1/0	1/0	1/0	1/0	1/0	1/0	1/0	1/0	1/0	1/0	1/0	1/0	1/0	1/0	1/0	1/0	1/0	1/0	1/0	1/0	1/0	1/0	1/0	1/0	1/0
NC_037342.1:83909702-83909808(+)	BosSINEL	51.04	48.96	541	519	13	515	2	6	1/0	1/0	1/0	1/0	1/0	1/0	1/0	1/0	1/0	1/0	1/0	1/0	1/0	1/0	1/0	1/0	1/0	1/0	1/0	1/0	1/0	1/0	1/0	1/0	1/0	1/0	1/0	1/0	1/0	1/0	1/0	1/0	1/0	1/0	1/0	1/0	1/0	1/0	1/0	1/0
NC_037342.1:84151079-84151351(+)	BosSINEL	80.17	19.83	845	209	320	205	2	9	1/1	1/0	1/0	1/0	1/1	1/0	1/0	1/1	1/1	1/0	1/1	1/0	1/1	1/1	1/1	1/1	1/1	1/1	1/1	1/1	1/1	1/0	1/0	1/1	1/1	1/0	1/0	1/1	1/1	1/0	1/1	1/0	1/1	1/1	1/0	1/1	1/1	1/1	1/1	1/1
NC_037342.1:84198503-84198620(-)	BosSINEL	50.19	49.81	531	527	6	519	4	7	1/0	1/0	1/0	1/0	1/0	1/0	1/0	1/0	1/0	1/0	1/0	1/0	1/0	1/0	1/0	1/0	1/0	1/0	1/0	1/0	1/0	1/0	1/0	1/0	1/0	1/0	1/0	1/0	1/0	1/0	1/0	1/0	1/0	1/0	1/0	1/0	1/0	1/0	1/0	1/0
NC_037342.1:84220068-84220342(-)	BosSINEL	70.25	29.75	732	310	211	310	0	15	1/0	1/0	1/0	1/0	1/0	1/1	1/1	1/1	1/1	1/0	1/0	1/0	1/1	1/0	1/0	1/1	1/1	1/0	1/1	1/1	1/0	1/0	1/1	1/1	1/1	1/0	1/1	1/0	1/0	1/1	1/1	1/1	1/1	1/1	1/1	1/1	1/0	1/1	1/0	1/1
NC_037342.1:84362560-84362680(-)	BosSINEL	63.16	36.84	667	389	145	377	6	8	1/0	1/1	1/0	1/0	1/1	1/0	1/1	1/1	1/0	1/1	1/0	1/0	1/0	1/0	1/0	1/0	1/0	1/0	1/0	1/0	1/0	1/1	1/0	1/0	1/1	1/0	1/0	1/0	1/0	1/0	1/0	1/0	1/0	1/0	1/0	1/0	1/0	1/0	1/0	1/1
NC_037342.1:84739960-84740227(+)	BosSINEL	49.15	50.85	521	539	1	519	10	6	1/0	1/0	1/0	1/0	1/0	1/0	1/0	1/0	1/0	1/0	1/0	1/0	1/0	1/0	1/0	1/0	1/0	1/0	1/0	1/0	1/0	1/0	1/0	1/0	1/0	1/0	1/0	1/0	1/0	1/0	1/0	1/0	1/0	1/0	1/0	1/0	1/0	1/0	1/0	1/0
NC_037342.1:84767022-84767229(+)	BosSINEL	82.41	17.59	862	184	343	176	4	13	1/1	1/1	1/1	1/0	1/0	1/0	1/0	1/1	1/0	1/0	1/0	1/0	1/1	1/0	1/1	1/1	1/0	1/1	1/1	1/1	1/1	1/1	1/0	1/0	1/1	1/1	1/0	1/0	1/1	1/0	1/0	1/0	1/0	1/0	1/0	1/0	1/1	1/1	1/1	1/0
NW_020191817.1:18366-18641(-)	BosSINEL	55.83	44.17	594	470	73	448	11	4	1/0	1/0	1/0	1/0	1/0	1/0	1/0	1/0	1/0	1/0	1/0	1/0	1/0	1/0	1/0	1/0	1/0	1/0	1/0	1/0	1/0	1/0	1/0	1/0	1/0	1/0	1/0	1/0	1/0	1/0	1/0	1/0	1/0	1/0	1/0	1/0	1/0	1/0	1/0	1/0
NW_020191849.1:15806-15966(+)	BosSINEL	49.32	50.68	507	521	45	417	52	22	1/0	1/0	1/0	1/0	1/0	0/0	1/0	1/0	1/0	1/0	1/0	1/0	1/0	0/0	1/0	1/1	1/0	1/0	1/0	1/0	0/0	1/0	1/1	1/0	1/1	1/0	1/0	1/0	1/0	1/0	1/0	1/0	0/0	1/0	1/0	1/0	1/1	1/0	1/0	1/0
NW_020191862.1:7067-7334(+)	BosSINEL	57.21	42.79	587	439	90	407	16	23	1/0	1/0	1/0	1/0	1/0	1/1	1/0	1/0	1/0	1/0	1/0	1/0	1/0	1/0	1/0	1/0	1/0	1/0	1/0	1/1	1/1	1/0	1/1	0/0	NA	1/0	1/0	1/0	1/1	1/0	1/0	1/0	1/0	1/0	1/0	NA	1/0	1/0	1/0	1/0
NC_037343.1:659219-659479(-)	BosSINEL	57.39	42.61	606	450	84	438	6	8	1/0	1/0	1/0	1/0	1/0	1/0	1/0	1/0	1/0	1/0	1/1	1/0	1/0	1/0	1/0	1/0	1/0	1/0	1/0	1/0	1/0	1/0	1/1	1/0	1/0	1/0	1/1	1/1	1/0	1/0	1/0	1/0	1/0	1/0	1/0	1/0	1/0	1/0	1/0	1/0
NC_037343.1:777798-778073(+)	BosSINEL	49.53	50.47	527	537	4	519	9	4	1/0	1/0	1/0	1/0	1/0	1/0	1/0	1/0	1/0	1/0	1/0	1/0	1/0	1/0	1/0	1/0	1/0	1/0	1/0	1/0	1/0	1/0	1/0	1/0	1/0	1/0	1/0	1/0	1/0	1/0	1/0	1/0	1/0	1/0	1/0	1/0	1/0	1/0	1/0	1/0
NC_037343.1:1014142-1014262(-)	BosSINEL	49.53	50.47	527	537	0	527	5	4	1/0	1/0	1/0	1/0	1/0	1/0	1/0	1/0	1/0	1/0	1/0	1/0	1/0	1/0	1/0	1/0	1/0	1/0	1/0	1/0	1/0	1/0	1/0	1/0	1/0	1/0	1/0	1/0	1/0	1/0	1/0	1/0	1/0	1/0	1/0	1/0	1/0	1/0	1/0	1/0
NC_037343.1:2687240-2687501(+)	BosSINEL	49.44	50.56	528	540	0	528	6	2	1/0	1/0	1/0	1/0	1/0	1/0	1/0	1/0	1/0	1/0	1/0	1/0	1/0	1/0	1/0	1/0	1/0	1/0	1/0	1/0	1/0	1/0	1/0	1/0	1/0	1/0	1/0	1/0	1/0	1/0	1/0	1/0	1/0	1/0	1/0	1/0	1/0	1/0	1/0	1/0
NC_037343.1:2978818-2978887(-)	BosSINEL	54.11	45.89	566	480	45	476	2	13	1/0	1/0	1/0	1/0	1/0	1/0	1/0	1/1	1/0	1/0	1/0	1/0	1/0	1/0	1/1	1/0	1/0	1/0	1/0	1/0	1/0	1/0	1/0	1/0	1/0	1/0	1/0	1/0	1/0	1/1	1/0	1/0	1/0	1/0	1/0	1/0	1/0	1/0	1/0	1/1
NC_037343.1:3331598-3331874(-)	BosSINEL	49.34	50.66	527	541	1	525	8	2	1/0	1/0	1/0	1/0	1/0	1/0	1/0	1/0	1/0	1/0	1/0	1/0	1/0	1/0	1/0	1/0	1/0	1/0	1/0	1/0	1/0	1/0	1/0	1/0	1/0	1/0	1/1	1/0	1/0	1/0	1/0	1/0	1/0	1/0	1/0	1/0	1/0	1/0	1/0	1/0
NC_037343.1:3499727-3499996(-)	BosSINEL	66.54	33.46	700	352	174	352	0	10	1/0	1/0	1/0	1/0	1/0	1/1	1/0	1/1	1/0	1/0	1/0	1/1	1/1	1/1	1/1	1/1	1/0	1/1	1/1	1/1	1/1	1/0	1/1	1/1	1/1	1/1	1/0	1/0	1/0	1/0	1/1	1/1	1/0	1/0	1/0	1/0	1/1	1/1	1/0	1/1
NC_037343.1:3950668-3950779(+)	BosSINEL	57.31	42.69	604	450	82	440	5	9	1/0	1/0	1/0	1/0	1/0	1/0	1/0	1/0	1/0	1/0	1/0	1/0	1/0	1/0	1/0	1/0	1/0	1/0	1/1	1/1	1/0	1/0	1/0	1/1	1/0	1/0	1/0	1/0	1/0	1/0	1/0	1/0	1/0	1/0	1/0	1/0	1/0	1/0	1/0	1/0
NC_037343.1:4773425-4773699(+)	BosSINEL	54.92	45.08	580	476	53	474	1	8	1/0	1/0	1/0	1/0	1/0	1/0	1/0	1/0	1/0	1/0	1/0	1/0	1/0	1/0	1/0	1/0	1/0	1/0	1/0	1/0	1/0	1/0	1/0	1/0	1/0	1/0	1/0	1/0	1/0	1/0	1/0	1/0	1/0	1/0	1/0	1/0	1/0	1/0	1/0	1/0
NC_037343.1:5388516-5388780(-)	BosSINEL	50.85	49.15	541	523	20	501	11	4	1/0	1/0	1/0	1/0	1/0	1/0	1/0	1/0	1/0	1/0	1/0	1/0	1/0	1/0	1/0	1/0	1/0	1/0	1/0	1/0	1/0	1/0	1/0	1/0	1/0	1/0	1/0	1/0	1/0	1/0	1/0	1/0	1/0	1/0	1/0	1/0	1/0	1/0	1/0	1/0
NC_037343.1:5618518-5618790(-)	BosSINEL	49.91	50.09	529	531	5	519	6	6	1/0	1/0	1/0	1/0	1/0	1/0	1/0	1/0	1/0	1/0	1/0	1/0	1/0	1/0	1/0	1/0	1/0	1/0	1/0	1/0	1/0	1/0	1/0	1/0	1/0	1/0	1/0	1/0	1/0	1/0	1/0	1/0	1/0	1/0	1/0	1/0	1/0	1/0	1/0	1/0
NC_037343.1:5643910-5644182(+)	BosSINEL	51.32	48.68	543	515	23	497	9	7	1/0	1/0	1/0	1/0	1/0	1/0	1/0	1/0	1/0	1/0	1/0	1/0	1/0	1/0	1/1	1/0	1/0	1/0	1/0	1/0	1/0	1/0	1/0	1/0	1/0	1/0	1/0	1/0	1/0	1/0	1/0	1/0	1/0	1/0	1/0	1/0	1/0	1/0	1/0	1/0
NC_037343.1:5651228-5651354(+)	BosSINEL	49.15	50.85	521	539	0	521	9	6	1/0	1/0	1/0	1/0	1/0	1/0	1/0	1/0	1/0	1/0	1/0	1/0	1/0	1/0	1/0	1/0	1/0	1/0	1/0	1/0	1/0	1/0	1/0	1/0	1/0	1/0	1/0	1/0	1/0	1/0	1/0	1/0	1/0	1/0	1/0	1/0	1/0	1/0	1/0	1/0
NC_037343.1:5860060-5860192(+)	BosSINEL	48.86	51.14	516	540	10	496	22	8	1/0	1/0	1/0	1/0	1/0	1/0	1/0	1/0	1/0	1/0	1/0	1/0	1/0	1/0	1/0	1/0	1/0	1/0	1/0	1/0	1/0	1/0	1/0	1/0	1/0	1/0	1/0	1/0	1/0	1/0	1/0	1/0	1/0	1/0	1/0	1/0	1/0	1/0	1/0	1/0
NC_037343.1:5864929-5865203(+)	BosSINEL	61.52	38.48	646	404	124	398	3	11	1/0	1/0	1/0	1/0	1/0	1/1	1/1	1/0	1/0	1/0	1/1	1/1	1/0	1/0	1/1	1/1	1/0	1/0	1/0	1/0	1/0	1/0	1/0	1/0	1/0	1/0	1/0	1/0	1/0	1/0	1/0	1/1	1/0	1/1	1/1	1/0	1/0	1/0	1/0	1/0
NC_037343.1:5964876-5965151(-)	BosSINEL	49.62	50.38	526	534	0	526	4	6	1/0	1/0	1/0	1/0	1/0	1/0	1/0	1/0	1/0	1/0	1/0	1/0	1/0	1/0	1/0	1/0	1/0	1/0	1/0	1/0	1/0	1/0	1/0	1/0	1/0	1/0	1/0	1/0	1/0	1/0	1/0	1/0	1/0	1/0	1/0	1/0	1/0	1/0	1/0	1/0
NC_037343.1:6033048-6033323(+)	BosSINEL	49.34	50.66	523	537	1	521	8	6	1/0	1/0	1/0	1/0	1/0	1/0	1/0	1/0	1/0	1/0	1/0	1/0	1/0	1/0	1/0	1/0	1/0	1/0	1/0	1/0	1/0	1/0	1/0	1/0	1/0	1/0	1/0	1/0	1/0	1/0	1/0	1/0	1/0	1/0	1/0	1/0	1/0	1/0	1/0	1/0
NC_037343.1:6056977-6057239(-)	BosSINEL	49.25	50.75	522	538	2	518	10	6	1/0	1/0	1/0	1/0	1/0	1/0	1/0	1/0	1/0	1/0	1/0	1/0	1/0	1/0	1/0	1/0	1/0	1/0	1/0	1/0	1/0	1/0	1/0	1/0	1/0	1/0	1/0	1/0	1/0	1/0	1/0	1/0	1/0	1/0	1/0	1/0	1/0	1/0	1/0	1/0
NC_037343.1:6069113-6069389(-)	BosSINEL	49.72	50.28	526	532	7	512	10	7	1/0	1/0	1/0	1/0	1/0	1/0	1/0	1/0	1/0	1/0	1/0	1/0	1/0	1/0	1/0	1/0	1/0	1/0	1/0	1/0	1/0	1/0	1/0	1/0	1/0	1/0	1/0	1/0	1/0	1/0	1/0	1/0	1/0	1/0	1/0	1/0	1/0	1/0	1/0	1/0
NC_037343.1:6242828-6243103(-)	BosSINEL	50	50	529	529	7	515	7	7	1/0	1/0	1/0	1/0	1/0	1/0	1/0	1/0	1/0	1/0	1/0	1/0	1/0	1/0	1/0	1/0	1/0	1/0	1/0	1/0	1/0	1/0	1/0	1/0	1/0	1/0	1/0	1/0	1/0	1/0	1/0	1/0	1/0	1/0	1/0	1/0	1/0	1/0	1/0	1/0
NC_037343.1:6269190-6269464(-)	BosSINEL	60.8	39.2	636	410	118	400	5	13	1/0	1/0	1/0	1/0	1/0	1/0	1/1	1/1	1/1	1/1	1/0	1/1	1/1	1/0	1/0	1/0	1/0	1/0	1/0	1/1	1/0	1/0	1/0	1/1	1/0	1/0	1/0	1/0	1/1	1/0	1/0	1/0	1/1	1/1	1/0	1/0	1/0	1/0	1/0	1/1
NC_037343.1:6293093-6293367(-)	BosSINEL	60.38	39.62	634	416	110	414	1	11	1/0	1/0	1/0	1/0	1/1	1/0	1/1	1/0	1/0	1/1	1/0	1/0	1/0	1/1	1/0	1/1	1/0	1/0	1/1	1/0	1/0	1/0	1/0	1/0	1/1	1/1	1/1	1/0	1/0	1/0	1/1	1/0	1/0	1/0	1/1	1/1	1/1	1/0	1/1	1/0
NC_037343.1:6873636-6873770(-)	BosSINEL	63.03	36.97	653	383	142	369	7	18	1/0	1/0	1/0	1/0	1/0	1/1	1/1	1/1	1/1	1/0	1/1	1/0	1/0	1/0	1/0	1/1	1/0	1/1	1/0	1/1	1/1	1/1	1/1	1/0	1/0	1/1	1/0	1/1	1/1	1/0	1/0	1/0	1/1	1/0	1/1	1/0	1/0	1/0	1/0	1/0
NC_037343.1:6882796-6883070(+)	BosSINEL	49.16	50.84	526	544	0	526	9	1	1/0	1/0	1/0	1/0	1/0	1/0	1/0	1/0	1/0	1/0	1/0	1/0	1/0	1/0	1/0	1/0	1/0	1/0	1/0	1/0	1/0	1/0	1/0	1/0	1/0	1/0	1/0	1/0	1/0	1/0	1/0	1/0	1/0	1/0	1/0	1/0	1/0	1/0	1/0	1/0
NC_037343.1:6952535-6952801(+)	BosSINEL	49.34	50.66	527	541	0	527	7	2	1/0	1/0	1/0	1/0	1/0	1/0	1/0	1/0	1/0	1/0	1/0	1/0	1/0	1/0	1/0	1/0	1/0	1/0	1/0	1/0	1/0	1/0	1/0	1/0	1/0	1/0	1/0	1/0	1/0	1/0	1/0	1/0	1/0	1/0	1/0	1/0	1/0	1/0	1/0	1/0
NC_037343.1:7341939-7342214(+)	BosSINEL	49.81	50.19	528	532	0	528	2	6	1/0	1/0	1/0	1/0	1/0	1/0	1/0	1/0	1/0	1/0	1/0	1/0	1/0	1/0	1/0	1/0	1/0	1/0	1/0	1/0	1/0	1/0	1/0	1/0	1/0	1/0	1/0	1/0	1/0	1/0	1/0	1/0	1/0	1/0	1/0	1/0	1/0	1/0	1/0	1/0
NC_037343.1:7447183-7447456(-)	BosSINEL	51.52	48.48	543	511	27	489	11	9	1/0	1/0	1/0	1/0	1/0	1/1	1/0	1/0	1/0	1/0	1/0	1/0	1/0	1/0	1/0	1/0	1/0	1/0	1/0	1/0	1/0	1/0	1/0	1/0	1/0	1/0	1/0	1/0	1/0	1/0	1/0	1/0	1/0	1/0	1/0	1/0	1/0	1/0	1/0	1/0
NC_037343.1:7723645-7723908(-)	BosSINEL	68.66	31.34	725	331	202	321	5	8	1/1	1/1	1/1	1/1	1/0	1/1	1/1	1/0	1/0	1/0	1/0	1/0	1/0	1/0	1/0	1/0	1/0	1/0	1/0	1/0	1/0	1/0	1/0	1/0	1/0	1/0	1/0	1/0	1/0	1/0	1/0	1/0	1/0	1/0	1/0	1/0	1/1	1/0	1/0	1/0
NC_037343.1:7940263-7940480(-)	BosSINEL	57.94	42.06	613	445	84	445	0	7	1/0	1/0	1/0	1/0	1/1	1/0	1/0	1/0	1/0	1/0	1/0	1/0	1/0	1/0	1/0	1/0	1/0	1/0	1/0	1/0	1/0	1/0	1/0	1/0	1/1	1/0	1/0	1/0	1/0	1/0	1/0	1/0	1/0	1/0	1/0	1/0	1/0	1/0	1/0	1/0
NC_037343.1:8371144-8371264(-)	BosSINEL	49.53	50.47	529	539	3	523	8	2	1/0	1/0	1/0	1/0	1/0	1/0	1/0	1/0	1/0	1/0	1/0	1/0	1/0	1/0	1/0	1/0	1/0	1/0	1/0	1/0	1/0	1/0	1/0	1/0	1/0	1/0	1/0	1/0	1/0	1/0	1/0	1/0	1/0	1/0	1/0	1/0	1/0	1/0	1/0	1/0
NC_037343.1:9031265-9031541(-)	BosSINEL	48.79	51.21	523	549	0	523	13	0	1/0	1/0	1/0	1/0	1/0	1/0	1/0	1/0	1/0	1/0	1/0	1/0	1/0	1/0	1/0	1/0	1/0	1/0	1/0	1/0	1/0	1/0	1/0	1/0	1/0	1/0	1/0	1/0	1/0	1/0	1/0	1/0	1/0	1/0	1/0	1/0	1/0	1/0	1/0	1/0
NC_037343.1:9467552-9467604(+)	BosSINEL	50.29	49.71	528	522	16	496	13	11	1/0	1/0	1/0	1/0	0/0	1/0	1/0	1/0	1/0	1/0	1/0	1/0	1/0	1/0	1/0	1/0	1/0	1/0	1/0	1/0	1/0	1/0	1/0	1/0	1/0	1/0	1/0	1/0	1/0	1/0	1/0	1/0	1/0	1/0	1/0	1/0	1/0	1/0	1/0	1/0
NC_037343.1:9551211-9551325(-)	BosSINEL	53.23	46.77	560	492	39	482	5	10	1/0	1/0	1/0	1/0	1/0	1/0	1/0	1/0	1/0	1/0	1/0	1/0	1/0	1/0	1/0	1/0	1/0	1/0	1/0	1/0	1/0	1/0	1/0	1/0	1/0	1/0	1/0	1/0	1/0	1/0	1/0	1/0	1/0	1/0	1/0	1/0	1/0	1/0	1/0	1/0
NC_037343.1:9639273-9639549(+)	BosSINEL	59.58	40.42	628	426	103	422	2	9	1/0	1/0	1/0	1/0	1/0	1/1	1/0	1/1	1/0	1/0	1/0	1/0	1/0	1/1	1/0	1/0	1/0	1/0	1/0	1/0	1/0	1/1	1/0	1/0	1/1	1/1	1/0	1/0	1/0	1/0	1/0	1/0	1/1	1/0	1/0	1/0	1/0	1/0	1/0	1/0
NC_037343.1:9877993-9878261(-)	BosSINEL	62.57	37.43	662	396	136	390	3	7	1/0	1/0	1/0	1/0	1/0	1/0	1/1	1/1	1/0	1/1	1/0	1/0	1/0	1/1	1/1	1/0	1/0	1/0	1/0	1/0	1/1	1/1	1/0	1/1	1/0	1/0	1/1	1/0	1/0	1/1	1/0	1/0	1/0	1/1	1/0	1/0	1/0	1/0	1/0	1/0
NC_037343.1:10172495-10172769(+)	BosSINEL	72.67	27.33	763	287	238	287	0	11	1/0	1/0	1/0	1/0	1/1	1/0	1/1	1/1	1/1	1/0	1/0	1/0	1/1	1/0	1/0	1/0	1/1	1/1	1/1	1/0	1/0	1/1	1/1	1/0	1/1	1/0	1/1	1/1	1/0	1/1	1/1	1/0	1/0	1/0	1/1	1/0	1/1	1/1	1/0	1/1
NC_037343.1:10268084-10268246(-)	BosSINEL	75.9	24.1	800	254	275	250	2	9	1/1	1/0	1/1	1/1	1/0	1/1	1/0	1/0	1/0	1/0	1/1	1/0	1/0	1/0	1/1	1/0	1/1	1/0	1/0	1/0	1/0	1/1	1/1	1/0	1/0	1/1	1/0	1/1	1/0	1/0	1/0	1/0	1/0	1/0	1/1	1/0	1/0	1/0	1/0	1/1
NC_037343.1:11119212-11119335(-)	BosSINEL	74.76	25.24	785	265	261	263	1	11	1/1	1/1	1/1	1/1	1/0	1/0	1/0	1/0	1/0	1/0	1/0	1/0	1/0	1/1	1/0	1/0	1/0	1/0	1/1	1/0	1/0	1/0	1/0	1/0	1/0	1/0	1/0	1/0	1/0	1/0	1/0	1/1	1/0	1/0	1/0	1/0	1/0	1/0	1/0	1/0
NC_037343.1:11265500-11265718(+)	BosSINEL	54.21	45.79	566	478	60	446	16	14	1/0	1/0	1/0	1/0	1/0	1/0	1/0	1/0	1/1	1/0	1/0	1/0	1/0	1/0	1/0	1/0	1/0	1/0	1/1	1/0	1/1	1/0	1/1	1/0	1/0	1/0	1/0	1/0	1/0	1/0	1/0	1/0	1/0	1/0	1/0	1/0	1/0	1/0	1/0	1/0
NC_037343.1:11478611-11478725(-)	BosSINEL	49.81	50.19	528	532	5	518	7	6	1/0	1/0	1/0	1/0	1/0	1/0	1/0	1/0	1/0	1/0	1/0	1/0	1/0	1/0	1/0	1/0	1/0	1/0	1/0	1/0	1/0	1/0	1/0	1/0	1/0	1/0	1/0	1/0	1/0	1/0	1/0	1/0	1/0	1/0	1/0	1/0	1/0	1/0	1/0	1/0
NC_037343.1:12632910-12633003(+)	BosSINEL	49.16	50.84	525	543	0	525	9	2	1/0	1/0	1/0	1/0	1/0	1/0	1/0	1/0	1/0	1/0	1/0	1/0	1/0	1/0	1/0	1/0	1/0	1/0	1/0	1/0	1/0	1/0	1/0	1/0	1/0	1/0	1/0	1/0	1/0	1/0	1/0	1/0	1/0	1/0	1/0	1/0	1/0	1/0	1/0	1/0
NC_037343.1:12795234-12795451(+)	BosSINEL	48.88	51.12	524	548	0	524	12	0	1/0	1/0	1/0	1/0	1/0	1/0	1/0	1/0	1/0	1/0	1/0	1/0	1/0	1/0	1/0	1/0	1/0	1/0	1/0	1/0	1/0	1/0	1/0	1/0	1/0	1/0	1/0	1/0	1/0	1/0	1/0	1/0	1/0	1/0	1/0	1/0	1/0	1/0	1/0	1/0
NC_037343.1:13311543-13311801(-)	BosSINEL	51.23	48.77	543	517	22	499	9	6	1/0	1/0	1/0	1/0	1/0	1/0	1/0	1/0	1/0	0/0	1/0	1/0	1/0	1/0	1/0	1/0	1/0	1/0	1/0	1/0	1/0	1/0	1/0	1/0	1/0	1/0	1/0	1/0	1/0	1/0	1/0	1/0	1/0	1/0	1/0	1/0	1/0	1/0	1/0	1/0
NC_037343.1:13533499-13533774(+)	BosSINEL	77.95	22.05	820	232	298	224	4	10	1/1	1/1	1/1	1/1	1/0	1/1	1/0	1/0	1/0	1/0	1/0	1/0	1/1	1/1	1/1	1/0	1/0	1/0	1/0	1/0	1/0	1/0	1/0	1/1	1/0	1/0	1/0	1/0	1/0	1/0	1/0	1/0	1/0	1/0	1/0	1/0	1/0	1/0	1/0	1/0
NC_037343.1:13888229-13888503(+)	BosSINEL	49.91	50.09	526	528	21	484	22	9	1/0	1/0	0/0	1/0	1/0	1/0	1/0	0/0	1/0	1/0	1/0	1/1	1/0	1/1	1/0	1/0	1/0	1/0	1/0	1/0	1/0	1/0	1/0	1/0	1/0	1/0	1/0	1/0	1/0	1/0	1/0	1/0	1/0	1/0	1/0	1/0	1/0	1/0	1/0	1/0
NC_037343.1:14267084-14267358(+)	BosSINEL	68.58	31.42	727	333	198	331	1	6	1/0	1/0	1/0	1/1	1/0	1/0	1/0	1/0	1/0	1/0	1/0	1/0	1/0	1/0	1/1	1/0	1/0	1/0	1/0	1/0	1/0	1/1	1/0	1/1	1/1	1/0	1/0	1/0	1/0	1/0	1/0	1/0	1/0	1/0	1/0	1/0	1/0	1/0	1/0	1/0
NC_037343.1:14890366-14890637(-)	BosSINEL	49.34	50.66	527	541	2	523	9	2	1/0	1/0	1/0	1/0	1/0	1/0	1/0	1/0	1/0	1/0	1/0	1/0	1/0	1/0	1/0	1/0	1/0	1/0	1/0	1/0	1/0	1/0	1/0	1/0	1/0	1/0	1/0	1/0	1/0	1/0	1/0	1/0	1/0	1/0	1/0	1/0	1/0	1/0	1/0	1/0
NC_037343.1:16215881-16216153(+)	BosSINEL	49.25	50.75	528	544	0	528	8	0	1/0	1/0	1/0	1/0	1/0	1/0	1/0	1/0	1/0	1/0	1/0	1/0	1/0	1/0	1/0	1/0	1/0	1/0	1/0	1/0	1/0	1/0	1/0	1/0	1/0	1/0	1/0	1/0	1/0	1/0	1/0	1/0	1/0	1/0	1/0	1/0	1/0	1/0	1/0	1/0
NC_037343.1:17170268-17170541(+)	BosSINEL	48.78	51.22	521	547	0	521	13	2	1/0	1/0	1/0	1/0	1/0	1/0	1/0	1/0	1/0	1/0	1/0	1/0	1/0	1/0	1/0	1/0	1/0	1/0	1/0	1/0	1/0	1/0	1/0	1/0	1/0	1/0	1/0	1/0	1/0	1/0	1/0	1/0	1/0	1/0	1/0	1/0	1/0	1/0	1/0	1/0
NC_037343.1:17334153-17334423(+)	BosSINEL	81.24	18.76	853	197	341	171	13	11	1/1	1/1	1/1	1/1	1/0	1/0	1/1	1/1	1/0	1/1	1/0	1/0	0/0	1/0	1/0	1/1	1/0	1/0	1/1	1/0	1/0	1/1	1/0	1/0	1/1	1/0	1/1	1/1	1/1	1/1	1/1	1/0	1/1	1/0	1/0	1/1	1/1	1/0	1/0	1/0
NC_037343.1:18374878-18375153(+)	BosSINEL	64.35	35.65	686	380	158	370	5	3	1/1	1/1	1/0	1/1	1/0	1/0	1/0	1/0	1/0	1/0	1/0	1/1	1/0	1/1	1/0	1/0	1/0	1/0	1/0	1/0	1/0	1/0	1/0	1/0	1/0	1/0	1/0	1/0	1/0	1/0	1/0	1/0	1/0	1/0	1/0	1/0	1/0	1/0	1/0	1/0
NC_037343.1:18469750-18470011(-)	BosSINEL	73.37	26.63	766	278	244	278	0	14	1/1	1/0	1/1	1/0	1/1	1/0	1/0	1/0	1/0	1/0	1/0	1/0	1/1	1/1	1/0	1/0	1/0	1/1	1/0	1/0	1/1	1/0	1/1	1/0	1/0	1/1	1/0	1/1	1/0	1/1	1/1	1/1	1/0	1/1	1/0	1/1	1/1	1/0	1/1	1/1
NC_037343.1:18996258-18996534(-)	BosSINEL	58.06	41.94	612	442	88	436	3	9	1/0	1/0	1/0	1/0	1/0	1/0	1/0	1/0	1/1	1/0	1/0	1/0	1/1	1/0	1/1	1/0	1/0	1/0	1/0	1/0	1/0	1/0	1/0	1/0	1/0	1/0	1/0	1/0	1/0	1/0	1/0	1/0	1/1	1/0	1/0	1/0	1/0	1/0	1/0	1/0
NC_037343.1:19076176-19076460(+)	BosSINEL	81.58	18.42	855	193	333	189	2	12	1/1	1/0	1/0	1/0	1/0	1/1	1/1	1/0	1/0	1/1	1/1	1/1	1/0	1/1	1/1	1/0	1/0	1/1	1/1	1/0	1/0	1/1	1/1	1/0	1/0	1/0	1/1	1/1	1/0	1/1	1/1	1/0	1/1	1/0	1/0	1/0	1/1	1/0	1/1	1/1
NC_037343.1:19312568-19312663(+)	BosSINEL	45.06	54.94	483	589	0	483	53	0	1/0	1/0	1/0	1/0	1/0	1/0	1/0	1/0	1/0	1/0	0/0	1/0	1/0	1/0	1/0	0/0	1/0	1/0	1/0	1/0	1/0	0/0	1/0	1/0	1/0	1/0	1/0	1/0	1/0	1/0	1/0	1/0	1/0	1/0	1/0	1/0	1/0	0/0	1/0	1/0
NC_037343.1:19651505-19651648(-)	BosSINEL	69.05	30.95	725	325	207	311	7	11	1/1	1/1	1/1	1/0	1/0	1/0	1/0	1/0	1/1	1/0	1/0	1/0	1/0	1/0	1/0	1/0	1/1	1/1	1/0	1/0	1/0	1/0	1/0	1/0	1/0	1/0	1/0	1/0	1/1	1/0	1/0	1/0	1/0	1/0	1/0	1/0	1/0	1/0	1/0	1/1
NC_037343.1:20788601-20788870(-)	BosSINEL	49.16	50.84	525	543	0	525	9	2	1/0	1/0	1/0	1/0	1/0	1/0	1/0	1/0	1/0	1/0	1/0	1/0	1/0	1/0	1/0	1/0	1/0	1/0	1/0	1/0	1/0	1/0	1/0	1/0	1/0	1/0	1/0	1/0	1/0	1/0	1/0	1/0	1/0	1/0	1/0	1/0	1/0	1/0	1/0	1/0
NC_037343.1:21148091-21148236(+)	BosSINEL	58.71	41.29	620	436	94	432	2	8	1/0	1/0	1/0	1/0	1/0	1/0	1/0	1/0	1/0	1/0	1/0	1/0	1/0	1/0	1/0	1/1	1/0	1/0	1/0	1/1	1/0	1/0	1/0	1/0	1/0	1/0	1/0	1/0	1/1	1/0	1/0	1/0	1/0	1/1	1/0	1/0	1/0	1/0	1/0	1/0
NC_037343.1:21243947-21244072(-)	BosSINEL	56.79	43.21	602	458	74	454	2	6	1/0	1/0	1/0	1/0	1/0	1/0	1/0	1/0	1/0	1/0	1/0	1/0	1/0	1/1	1/0	1/0	1/0	1/0	1/0	1/0	1/0	1/0	1/0	1/0	1/0	1/0	1/0	1/0	1/0	1/0	1/0	1/0	1/0	1/0	1/0	1/0	1/0	1/0	1/0	1/0
NC_037343.1:21424547-21424824(-)	BosSINEL	62.48	37.52	656	394	134	388	3	11	1/0	1/0	1/0	1/0	1/0	1/0	1/1	1/1	1/0	1/0	1/0	1/0	1/0	1/0	1/0	1/0	1/0	1/0	1/0	1/0	1/1	1/0	1/1	1/0	1/0	1/0	1/0	1/1	1/0	1/0	1/1	1/1	1/1	1/0	1/0	1/0	1/0	1/0	1/0	1/0
NC_037343.1:21680343-21680609(+)	BosSINEL	53.97	46.03	571	487	54	463	12	7	1/1	1/0	1/0	1/0	1/0	1/0	1/0	1/0	1/0	1/0	1/0	1/0	1/0	1/0	1/0	1/0	1/0	1/0	1/0	1/0	1/0	1/0	1/0	1/0	1/0	1/0	1/0	1/0	1/0	1/0	1/0	1/0	1/0	1/0	1/0	1/0	1/0	1/0	1/0	1/0
NC_037343.1:22262787-22263061(-)	BosSINEL	78.78	21.22	824	222	305	214	4	13	1/1	1/1	1/0	1/1	1/0	1/0	1/0	1/1	1/0	1/0	1/0	1/0	1/1	1/1	1/0	1/0	1/0	1/0	1/0	1/0	1/0	1/0	1/0	1/1	1/0	1/0	1/1	1/0	1/1	1/1	1/0	1/0	1/0	1/0	1/0	1/0	1/0	1/0	1/0	1/0
[truncated: 4,057 more rows]
[truncated: 496 more columns]

## Sheet: S1C_Primer_candidates
Table S1C Primers of 7 selected polymorphic BosSINEL loci for PCR validation
Primer Name	Forward Primer Sequences	Reverse Primer Sequences	Position	Product Size (bp)	Annealing Temperature
[truncated: 7 more rows]

## Sheet: S1D_Genotyping in more cows
Table S1D Validation results of 7 selected polymorphic BosSINEL
[truncated: 8 more rows]
[truncated: 47 more columns]
