# Supplementary material
Source: Research Square preprint supplement (doi:10.21203/rs.3.rs-9590742/v1)
Supplement: Supplementary file 2 [file 2071fd424cf04041db71be44.xlsx]

## Sheet: S4A_DM_SINE
Table S4A Differentially methylated SINE retrotransposons identified in bovine milk somatic cells related to Subclinical mastitis
ID (a unique identifier based on SINE genomic coordinates, combining chromosome, start, and end positions)	family	strand	number_cpg	mean DNA methylation level in all samples	mean DNA methylation level in samples with S.aureus subclinical masistiis	mean DNA methylation level in controls samples	DNA methylation change	p_value	p_adj
ctg1-100299746-100300012	BosSINEL	+	6	73.6517	82.8792	62.1998	20.6794	7.73607e-05	0.0124599
ctg1-1025015-1025125	BosSINE2	-	4	77.2867	89.0946	62.9798	26.1148	0.000707298	0.0243453
ctg1-10266523-10266710	BosSINE2	+	4	88.2412	94.7259	80.1905	14.5354	0.00230253	0.0418835
ctg1-10293971-10294241	BosSINEL	-	4	71.0004	81.4397	58.6456	22.7941	0.00178879	0.0363949
ctg1-10368313-10368558	BosSINEL	+	12	91.9792	96.9464	86.0513	10.8951	0.000126017	0.013894
ctg1-10371498-10371773	BosSINEL	-	9	89.3763	94.3228	83.5808	10.742	0.000858483	0.026256
ctg1-10392700-10392905	BosSINE3	+	5	82.3409	89.8376	73.1795	16.6581	0.00149782	0.0334817
ctg1-10405651-10405828	BosSINE3	-	3	83.7937	91.0578	75.141	15.9168	0.000250236	0.0167908
ctg1-10406330-10406597	BosSINEL	+	8	89.2698	95.5101	81.7516	13.7584	0.00124915	0.0309714
ctg1-10424752-10424980	BosSINE2	+	3	90.375	95.6119	83.8756	11.7363	0.000729818	0.0250149
ctg1-10516601-10516848	BosSINEL	+	8	86.3936	93.459	78.3252	15.1338	0.000707298	0.0243453
ctg1-10519842-10520053	BosSINE3	+	5	81.2362	92.8088	66.9931	25.8157	0.000858483	0.026256
ctg1-105976718-105976833	BosSINE3	+	4	15.3044	20.4988	8.66522	11.8336	7.21215e-05	0.0124599
ctg1-106038690-106038880	BosSINE2	-	3	84.6262	92.1664	75.1094	17.0569	0.00198042	0.0394187
ctg1-106103351-106103529	BosSINEL	-	6	75.2041	88.9136	60.0541	28.8595	0.000575562	0.0224556
ctg1-106129829-106130093	BosSINEL	+	9	79.4605	89.4354	67.9604	21.475	0.00108524	0.0293547
ctg1-106323522-106323724	BosSINE2	+	4	50.1291	41.4517	60.5302	-19.0785	0.000580014	0.0224556
ctg1-106390691-106390964	BosSINEL	+	8	85.6869	91.4531	78.5899	12.8632	0.00124915	0.0309714
ctg1-106439709-106439851	BosSINEL	-	4	31.9787	19.9367	47.4314	-27.4948	0.00115578	0.0309714
ctg1-106445694-106445961	BosSINEL	-	5	80.5756	87.7117	72.07	15.6417	4.62101e-05	0.0113782
ctg1-10666932-10667065	BosSINE6	+	3	21.5063	8.96042	36.9474	-27.987	0.00212864	0.0396247
ctg1-106685038-106685183	BosSINE2	-	3	87.8135	92.467	81.977	10.49	0.00108369	0.0293547
ctg1-106933832-106934071	BosSINE3	-	3	88.57	93.9527	82.3994	11.5534	0.00214001	0.0396247
ctg1-10693976-10694168	BosSINE1	+	4	85.4348	93.9276	75.2365	18.691	0.000473624	0.0209513
ctg1-107021475-107021743	BosSINEL	-	6	87.3124	95.0191	78.7063	16.3128	0.00252352	0.0430208
ctg1-107064438-107064713	BosSINEL	-	12	64.6442	56.9591	74.3068	-17.3477	0.000473624	0.0209513
ctg1-107403937-107404208	BosSINEL	+	9	82.7817	90.1786	74.3166	15.862	0.00124915	0.0309714
ctg1-107738948-107739149	BosSINE2	-	3	75.4819	85.204	63.2767	21.9273	0.00149782	0.0334817
ctg1-107775323-107775454	BosSINEL	+	4	25.1733	11.4039	42.1202	-30.7163	0.000210536	0.0163489
ctg1-108280052-108280162	BosSINE2	+	6	88.1992	92.8788	82.5792	10.2997	0.00038477	0.0194558
ctg1-108366089-108366291	BosSINE2	+	3	78.8035	91.326	62.9853	28.3408	9.90217e-05	0.0132745
ctg1-108733623-108733841	BosSINE2	+	6	83.8222	91.587	74.2533	17.3337	0.000580014	0.0224556
ctg1-109747791-109748004	BosSINE2	+	3	75.0017	83.3825	63.9779	19.4046	0.000250236	0.0167908
ctg1-109966586-109966779	BosSINE1	-	5	88.213	93.6312	81.1586	12.4726	0.000574659	0.0224556
ctg1-11042941-11043213	BosSINEL	+	6	84.2275	89.5623	77.4022	12.16	2.67594e-05	0.0103792
ctg1-110441519-110441780	BosSINEL	-	9	74.8021	69.1656	81.7738	-12.6081	2.00696e-05	0.0097305
ctg1-110519385-110519610	BosSINE2	-	9	88.3094	93.4226	82.0162	11.4063	9.90217e-05	0.0132745
ctg1-110704285-110704594	BosSINEL	-	7	73.9525	84.5134	60.9544	23.559	0.000250236	0.0167908
ctg1-11079548-11079759	BosSINE2	-	5	80.7943	86.9316	73.4254	13.5062	0.000473624	0.0209513
ctg1-110846273-110846548	BosSINEL	-	5	80.6898	89.6777	69.1369	20.5408	0.00124915	0.0309714
ctg1-11109069-11109270	BosSINE2	+	3	81.7298	87.6752	75.0072	12.668	0.00198042	0.0394187
ctg1-111113666-111113843	BosSINE2	-	5	62.291	71.3235	51.4677	19.8558	0.00212864	0.0396247
ctg1-111120970-111121245	BosSINEL	+	8	84.9907	90.207	78.7048	11.5022	0.00252352	0.0430208
ctg1-111305882-111306064	BosSINEL	-	6	85.1548	89.7896	79.2025	10.5871	0.00103778	0.0285926
ctg1-111667038-111667309	BosSINEL	-	5	84.8997	89.9557	78.98	10.9757	0.00103778	0.0285926
ctg1-111744195-111744442	BosSINEL	-	3	89.9414	96.2377	82.0667	14.1711	0.00317425	0.0490487
ctg1-111744843-111745068	BosSINE2	-	4	85.5401	95.8273	72.8788	22.9485	0.000348606	0.0194558
ctg1-111833748-111833948	BosSINE2	+	5	84.9734	93.9645	73.619	20.3456	9.90217e-05	0.0132745
ctg1-112214640-112214840	BosSINE2	+	3	83.7508	90.0531	76.2833	13.7698	0.00092863	0.0278673
ctg1-112865724-112865915	BosSINE3	+	4	76.3806	89.1396	60.913	28.2266	0.000580014	0.0224556
ctg1-11303806-11304020	BosSINE3	+	3	57.4411	68.714	43.9115	24.8025	0.00015926	0.0148443
ctg1-113239648-113239844	BosSINE3	-	3	73.1638	78.4323	66.6795	11.7528	0.00298141	0.0468558
ctg1-113389071-113389242	BosSINE3	+	3	83.0013	92.6435	71.0761	21.5675	0.000311152	0.0180281
ctg1-11352779-11353003	BosSINE3	-	3	78.2485	83.5687	71.0894	12.4794	7.73607e-05	0.0124599
ctg1-113822364-113822567	BosSINE2	+	5	85.816	91.6374	78.6894	12.9481	0.000250236	0.0167908
ctg1-114116661-114116686	BosSINE2	-	3	88.3322	94.6479	80.559	14.0889	0.00322149	0.0496975
ctg1-114322832-114323105	BosSINEL	-	4	87.3861	92.8473	81.0989	11.7484	0.000473624	0.0209513
ctg1-1150305-1150580	BosSINEL	+	7	84.4193	90.2265	77.6637	12.5628	0.00149782	0.0334817
ctg1-115281120-115281390	BosSINEL	+	9	19.1711	12.252	27.6322	-15.3802	0.000707298	0.0243453
ctg1-115444026-115444300	BosSINEL	-	5	52.928	43.4886	64.839	-21.3504	0.00108524	0.0293547
ctg1-115549733-115550000	BosSINEL	+	5	55.8841	48.7819	64.8158	-16.0339	0.000707298	0.0243453
ctg1-11578302-11578559	BosSINEL	-	6	81.9	86.8853	76.1295	10.7559	9.90217e-05	0.0132745
ctg1-116006294-116006568	BosSINEL	-	3	82.1411	92.7962	69.5015	23.2947	0.00147414	0.0334817
ctg1-116521664-116521930	BosSINEL	+	3	85.6282	90.475	79.6628	10.8122	0.000311152	0.0180281
ctg1-116747892-116748003	BosSINEL	-	5	87.1583	95.8869	75.9236	19.9632	2.85866e-06	0.00818994
ctg1-116979160-116979434	BosSINEL	+	7	69.2666	61.3788	77.9631	-16.5843	0.000858483	0.026256
ctg1-117055082-117055307	BosSINE2	+	5	90.6623	95.4784	84.7846	10.6938	2.67594e-05	0.0103792
ctg1-117112034-117112237	BosSINE3	+	4	83.9421	93.7924	72.4635	21.3289	9.90217e-05	0.0132745
ctg1-117330292-117330567	BosSINEL	+	9	23.3387	9.28223	39.1361	-29.8538	4.09643e-06	0.00846538
ctg1-117366076-117366351	BosSINEL	+	7	86.2702	92.5289	79.3038	13.2251	0.00178879	0.0363949
ctg1-117420980-117421191	BosSINE3	-	3	72.1703	86.1441	55.3359	30.8082	0.000250236	0.0167908
ctg1-117520843-117521004	BosSINE3	+	3	82.8592	93.526	69.7308	23.7953	0.00183649	0.0372002
ctg1-117521193-117521369	BosSINEL	-	5	73.9245	87.654	57.6638	29.9902	0.00124915	0.0309714
ctg1-117526975-117527215	BosSINEL	+	4	82.6678	95.2881	68.112	27.1761	0.000176916	0.0158399
ctg1-11771611-11771824	BosSINE3	+	4	50.8245	59.214	40.2229	18.9911	0.00149782	0.0334817
ctg1-117861962-117862180	BosSINE2	-	5	43.3971	35.4712	54.1606	-18.6893	0.000473624	0.0209513
ctg1-117904047-117904228	BosSINEL	+	4	82.3596	91.7888	70.3491	21.4396	0.00198806	0.0394187
ctg1-118003969-118004146	BosSINE4	-	5	87.0083	92.2163	80.5985	11.6178	0.000250236	0.0167908
ctg1-118296720-118296919	BosSINE1	-	5	85.7842	91.7043	78.8062	12.8981	0.00149782	0.0334817
ctg1-118499143-118499332	BosSINE2	-	3	76.2523	87.3875	62.3056	25.0819	7.73607e-05	0.0124599
ctg1-118559485-118559759	BosSINEL	+	9	75.0269	86.4914	60.9826	25.5087	0.00212864	0.0396247
ctg1-118572542-118572749	BosSINE3	+	5	75.431	87.8106	60.1946	27.616	0.00149782	0.0334817
ctg1-118625467-118625740	BosSINEL	-	9	59.2465	73.0355	43.635	29.4005	8.01604e-06	0.00881238
ctg1-118860968-118861039	BosSINE2	-	4	7.72529	1.99635	14.5522	-12.5559	0.00320632	0.0494937
ctg1-118867504-118867716	BosSINE2	-	3	80.0881	88.4131	70.1732	18.2399	0.000200254	0.0158399
ctg1-118916125-118916330	BosSINE3	-	3	58.1847	68.4535	46.0118	22.4418	0.000229514	0.0167908
ctg1-119064790-119065065	BosSINEL	+	5	31.7793	15.9249	49.9255	-34.0007	4.45076e-05	0.0113782
ctg1-119154686-119154901	BosSINE2	+	7	81.3097	75.1402	89.5953	-14.4551	0.000580014	0.0224556
ctg1-119257873-119258053	BosSINEL	+	5	42.4572	34.6856	52.0223	-17.3367	9.90217e-05	0.0132745
ctg1-119327311-119327524	BosSINE3	-	4	64.9291	56.7411	74.7192	-17.9781	2.00696e-05	0.0097305
ctg1-119404993-119405265	BosSINEL	-	6	80.9312	89.9836	69.907	20.0765	0.000311152	0.0180281
ctg1-119831121-119831311	BosSINE3	-	4	80.4716	88.3975	71.3529	17.0446	0.00103778	0.0285926
ctg1-119843732-119843971	BosSINEL	-	3	75.1092	80.8026	68.7535	12.0491	0.001255	0.0309714
ctg1-119984592-119984796	BosSINE3	+	4	76.1634	80.8041	70.4538	10.3502	0.00124915	0.0309714
ctg1-122258394-122258520	BosSINEL	+	5	53.1299	62.7175	42.1862	20.5313	0.00178879	0.0363949
ctg1-122589987-122590099	BosSINE2	-	3	71.6854	76.9803	65.2857	11.6946	0.00124915	0.0309714
ctg1-123311965-123312188	BosSINE2	-	5	70.2676	77.1989	61.4887	15.7102	0.00252352	0.0430208
ctg1-123329944-123330214	BosSINEL	-	9	81.1334	86.0423	75.1704	10.8719	0.000707298	0.0243453
ctg1-12463206-12463434	BosSINE2	-	5	74.6221	79.9537	68.06	11.8938	0.000707298	0.0243453
ctg1-124682723-124682815	BosSINE6	-	4	75.9212	87.3187	63.3351	23.9836	0.00126597	0.0309714
ctg1-124877793-124878028	BosSINE2	+	3	88.8632	95.7427	80.3962	15.3466	0.000296533	0.0180281
ctg1-125294691-125294913	BosSINE2	-	3	68.7172	76.7288	59.0949	17.6339	0.00178879	0.0363949
ctg1-125502058-125502329	BosSINEL	+	7	81.1493	86.4062	74.6791	11.7271	0.00178879	0.0363949
ctg1-125762897-125763099	BosSINE2	-	4	54.5344	45.9853	64.8618	-18.8765	0.00103778	0.0285926
ctg1-126192112-126192259	BosSINE1	-	3	82.3218	87.8069	75.2631	12.5438	0.000103627	0.0136341
ctg1-126719884-126720162	BosSINEL	+	7	84.8789	93.1974	74.9885	18.2089	9.90217e-05	0.0132745
ctg1-126729020-126729239	BosSINE3	+	5	79.2047	93.0352	62.5823	30.4529	7.73607e-05	0.0124599
ctg1-126826561-126826769	BosSINE1	-	9	74.4919	84.0888	62.8774	21.2114	5.9973e-05	0.011619
ctg1-127447179-127447373	BosSINE3	-	3	57.0623	49.6887	66.1778	-16.4891	0.00298141	0.0468558
ctg1-127623613-127623836	BosSINE1	+	3	86.4041	92.774	78.6848	14.0891	0.00295056	0.0468558
ctg1-127729010-127729067	BosSINE5	-	3	44.3563	27.9667	64.5282	-36.5615	1.32618e-06	0.00754262
ctg1-127801410-127801546	BosSINE5	-	4	90.3748	95.1302	84.5349	10.5952	0.00171346	0.0363949
ctg1-127918979-127919095	BosSINEL	-	8	74.2462	80.5966	67.2125	13.384	0.000580014	0.0224556
ctg1-128030591-128030864	BosSINEL	-	7	81.4447	88.1447	73.4745	14.6702	0.000707298	0.0243453
ctg1-128040615-128040822	BosSINE3	+	3	65.7414	76.2987	52.9128	23.3859	0.000250236	0.0167908
ctg1-128056160-128056431	BosSINEL	+	9	87.3483	93.5337	79.612	13.9216	7.90549e-05	0.0126412
ctg1-128674852-128675061	BosSINE3	-	3	77.6083	82.34	72.1487	10.1913	0.00313508	0.048485
ctg1-128976373-128976586	BosSINE2	+	4	73.4862	78.4219	67.4115	11.0103	0.000200254	0.0158399
ctg1-129315324-129315519	BosSINE3	-	3	54.6586	63.5948	43.6603	19.9345	0.00178879	0.0363949
ctg1-129355101-129355411	BosSINE1	-	3	66.1753	71.0281	60.2026	10.8256	0.00178879	0.0363949
ctg1-129368083-129368281	BosSINE3	-	3	83.1086	90.0823	74.5256	15.5567	0.00124915	0.0309714
ctg1-130162485-130162692	BosSINE3	+	3	83.8103	89.4135	76.9141	12.4994	0.00298141	0.0468558
ctg1-130241062-130241176	BosSINE6	-	3	34.6228	18.7698	52.605	-33.8352	0.00018896	0.0158399
ctg1-130282069-130282287	BosSINE2	+	3	87.6523	92.9483	81.039	11.9093	0.000250236	0.0167908
ctg1-130420682-130420894	BosSINE2	+	3	81.5462	90.6106	70.3469	20.2637	0.000250089	0.0167908
ctg1-130833703-130833978	BosSINEL	+	10	88.6818	94.776	81.0371	13.7389	0.000707298	0.0243453
ctg1-131696271-131696544	BosSINEL	+	4	77.7133	83.5109	70.4194	13.0915	0.00124915	0.0309714
ctg1-131898919-131899192	BosSINEL	-	12	80.3313	89.0914	69.238	19.8534	0.000200254	0.0158399
ctg1-132107579-132107787	BosSINE1	+	4	89.7073	94.4102	83.9192	10.4909	9.90217e-05	0.0132745
ctg1-132177748-132177960	BosSINE3	+	5	81.5181	92.5968	68.1415	24.4552	0.00092863	0.0278673
ctg1-132828543-132828745	BosSINE3	-	3	90.6264	97.0616	82.8147	14.2469	0.00136718	0.0331474
ctg1-133099076-133099216	BosSINE2	-	3	90.8327	96.1535	84.0531	12.1004	0.00170445	0.0363949
ctg1-133352166-133352378	BosSINE3	+	3	82.5069	93.7354	68.6872	25.0482	0.0013664	0.0331412
ctg1-133979759-133979871	BosSINEL	-	3	77.8032	83.5777	70.5767	13.001	0.00298141	0.0468558
ctg1-135369525-135369784	BosSINEL	+	6	83.8048	89.6425	76.2994	13.3431	0.00149782	0.0334817
ctg1-135533578-135533804	BosSINE3	-	3	83.877	90.3677	75.8885	14.4792	0.000707298	0.0243453
ctg1-136507626-136507837	BosSINE3	+	3	67.3686	73.0053	60.6866	12.3187	0.000858483	0.026256
ctg1-136808876-136809052	BosSINEL	+	7	16.0031	3.34539	31.8099	-28.4645	7.15315e-05	0.0124599
ctg1-136815606-136815941	BosSINE1	-	7	57.8395	62.6382	51.9912	10.647	1.09926e-05	0.00901759
ctg1-136815942-136816126	BosSINE3	+	4	87.8741	93.4875	80.9654	12.5221	5.9973e-05	0.011619
ctg1-136892285-136892552	BosSINEL	-	8	87.7886	93.35	81.3575	11.9924	0.000858483	0.026256
ctg1-137192015-137192239	BosSINEL	+	10	48.5925	43.8648	54.4374	-10.5726	0.00212864	0.0396247
ctg1-137666190-137666325	BosSINEL	-	3	75.9787	81.2469	69.4949	11.752	0.000858483	0.026256
ctg1-137673209-137673394	BosSINEL	-	3	75.0282	81.3323	67.2692	14.0631	0.000580014	0.0224556
ctg1-137734391-137734594	BosSINE2	+	4	75.6278	83.099	66.113	16.986	0.000311152	0.0180281
ctg1-138654512-138654725	BosSINE3	-	3	73.5473	78.4697	67.4545	11.0152	9.90217e-05	0.0132745
ctg1-138727755-138727947	BosSINE1	-	4	81.1163	87.5758	72.376	15.1998	0.000250236	0.0167908
ctg1-138728364-138728588	BosSINEL	+	6	82.0529	88.0994	74.4848	13.6147	0.000250236	0.0167908
ctg1-13935273-13935442	BosSINE1	-	3	73.9993	79.1097	68.25	10.8597	0.000580014	0.0224556
ctg1-139366856-139367066	BosSINE3	-	3	87.3592	94.5938	78.4551	16.1386	0.00184367	0.0372002
ctg1-139442164-139442361	BosSINE2	-	8	74.369	82.9677	63.3168	19.6509	0.000126017	0.013894
ctg1-139461706-139461898	BosSINE3	+	3	65.7093	78.0229	50.0737	27.9493	0.000126017	0.013894
ctg1-139814661-139814871	BosSINE1	-	5	76.0879	84.8787	65.5668	19.3119	0.000176916	0.0158399
ctg1-140060233-140060439	BosSINE3	-	4	71.4046	82.9529	57.4726	25.4802	0.00038477	0.0194558
ctg1-140563824-140564027	BosSINE3	-	4	78.4682	85.4162	70.5173	14.8989	7.73607e-05	0.0124599
ctg1-140605070-140605320	BosSINE2	+	4	78.2535	83.0216	72.2887	10.7329	0.00178879	0.0363949
ctg1-140900452-140900585	BosSINE2	+	4	78.5279	85.2106	69.9396	15.271	0.00178879	0.0363949
ctg1-141190837-141191062	BosSINE2	+	6	76.5544	82.7204	68.9437	13.7767	0.00103778	0.0285926
ctg1-141347446-141347721	BosSINEL	-	13	79.17	87.3932	68.8249	18.5683	0.00252352	0.0430208
ctg1-141542817-141542954	BosSINEL	+	6	72.8213	67.7131	79.2761	-11.563	0.00151984	0.0338594
ctg1-141726813-141727019	BosSINE3	+	5	78.637	88.2246	66.8899	21.3348	0.00149782	0.0334817
ctg1-141780856-141781038	BosSINEL	-	7	73.9671	84.6195	60.8836	23.7359	0.000200254	0.0158399
ctg1-141801824-141802056	BosSINE2	-	4	84.4286	91.1012	76.5554	14.5458	0.000473624	0.0209513
ctg1-141891314-141891533	BosSINE2	-	6	79.4289	91.2109	64.6323	26.5785	0.000296533	0.0180281
ctg1-141924069-141924250	BosSINE1	+	3	69.1561	87.9163	47.5939	40.3223	0.000155455	0.0148443
ctg1-142035827-142035993	BosSINE2	+	3	79.184	91.835	63.4509	28.3841	0.00265228	0.0446645
ctg1-142386856-142387066	BosSINE3	+	4	83.2651	94.6336	69.2731	25.3605	0.000530614	0.0224556
ctg1-142427901-142428017	BosSINEL	+	3	79.8251	90.9052	65.2654	25.6398	9.90217e-05	0.0132745
ctg1-142448227-142448356	BosSINE4	-	4	79.9073	95.3086	60.9519	34.3567	0.000449632	0.0209513
ctg1-142525387-142525577	BosSINE1	+	3	76.389	70.8674	83.5382	-12.6709	0.00124915	0.0309714
ctg1-142534773-142535000	BosSINE2	+	6	89.1778	94.2686	83.1263	11.1423	2.67594e-05	0.0103792
ctg1-142579165-142579268	BosSINEL	-	5	88.6776	96.405	79.1669	17.2381	0.000412587	0.0205211
ctg1-142608709-142608768	BosSINE3	-	6	24.339	9.77667	41.1417	-31.365	0.00151984	0.0338594
ctg1-142632585-142632851	BosSINEL	+	4	82.7423	91.0447	72.576	18.4687	3.52765e-05	0.0107934
ctg1-142753922-142754064	BosSINE2	-	4	83.3843	95.1844	68.1976	26.9868	0.00108369	0.0293547
ctg1-142800692-142800905	BosSINE3	-	4	86.1185	94.9411	75.5397	19.4014	0.000272385	0.0180281
ctg1-142890256-142890461	BosSINE3	-	4	83.0724	92.8984	70.9788	21.9196	5.9973e-05	0.011619
ctg1-143055906-143056113	BosSINE2	+	4	38.2255	33.0103	44.3317	-11.3214	0.00298141	0.0468558
ctg1-143206961-143207229	BosSINEL	-	5	83.1776	91.3388	72.9203	18.4184	5.9973e-05	0.011619
ctg1-143361694-143361886	BosSINE2	+	3	75.9735	83.4369	66.6513	16.7857	0.000858483	0.026256
ctg1-143612353-143612492	BosSINE2	+	4	28.1487	18.7414	39.4635	-20.7221	0.00252352	0.0430208
ctg1-143663675-143663873	BosSINE2	+	4	81.1877	95.7229	63.8715	31.8514	2.6892e-05	0.0104199
ctg1-143741638-143741755	BosSINE6	+	3	72.6764	82.95	60.0321	22.9179	0.000624034	0.0239174
ctg1-143759290-143759341	BosSINE2	-	3	85.3453	79.9429	91.85	-11.9071	0.00212864	0.0396247
ctg1-143811498-143811710	BosSINE2	+	3	79.3289	84.329	72.8741	11.4548	0.00117239	0.0309714
ctg1-143943800-143943961	BosSINE5	-	4	22.8802	6.72734	43.5901	-36.8627	0.000250089	0.0167908
ctg1-143944891-143945107	BosSINE3	-	3	37.777	29.5031	47.9603	-18.4571	0.000200254	0.0158399
ctg1-143949108-143949230	BosSINE5	+	4	83.7894	93.318	71.9097	21.4083	0.00212864	0.0396247
ctg1-143958028-143958152	BosSINE1	-	4	82.1009	93.0414	68.6356	24.4058	0.00198806	0.0394187
ctg1-144047369-144047594	BosSINE2	-	6	50.149	43.0499	58.8513	-15.8014	9.90217e-05	0.0132745
ctg1-144195138-144195399	BosSINEL	-	11	68.2112	80.2126	53.8379	26.3747	0.000200254	0.0158399
ctg1-144451878-144452152	BosSINEL	-	5	79.85	90.8851	66.4992	24.3859	0.00103778	0.0285926
ctg1-144472004-144472135	BosSINE2	-	4	45.9551	36.3196	58.2513	-21.9317	0.00015926	0.0148443
ctg1-144623504-144623649	BosSINE6	-	3	84.1642	91.1217	76.0615	15.0601	2.00696e-05	0.0097305
ctg1-144678008-144678198	BosSINE3	+	7	79.112	86.2413	70.6394	15.602	0.000311152	0.0180281
ctg1-144680450-144680674	BosSINE2	+	4	83.8879	88.4695	78.249	10.2205	0.00149782	0.0334817
ctg1-144708318-144708435	BosSINE2	+	4	89.6957	94.9078	83.2808	11.627	0.000707298	0.0243453
ctg1-144758050-144758187	BosSINE1	+	7	45.371	53.7797	35.0245	18.7551	0.000793191	0.026256
ctg1-144758067-144758201	BosSINEL	+	6	51.7066	61.4703	39.6897	21.7806	0.000311152	0.0180281
ctg1-144839685-144839874	BosSINE3	-	3	75.5453	84.5177	63.9312	20.5865	0.00178879	0.0363949
ctg1-144894018-144894234	BosSINE2	+	4	71.336	84.1991	55.926	28.2731	0.000200254	0.0158399
ctg1-145340656-145340905	BosSINEL	+	10	81.2167	89.9431	70.2648	19.6783	0.000707298	0.0243453
ctg1-145531642-145531966	BosSINE1	-	3	78.9868	86.8854	69.2654	17.62	0.00158966	0.0351234
ctg1-145854287-145854420	BosSINE3	+	4	77.6155	86.9174	65.8832	21.0342	0.00015926	0.0148443
ctg1-145877439-145877555	BosSINE3	+	4	88.0951	96.099	78.5029	17.5961	0.00158119	0.0351234
ctg1-146097217-146097424	BosSINE2	-	10	71.101	64.895	78.9184	-14.0234	0.00103778	0.0285926
ctg1-146278567-146278840	BosSINEL	-	6	75.9248	88.1282	60.6307	27.4976	0.000473624	0.0209513
ctg1-146896185-146896302	BosSINE6	-	3	80.3158	90.8822	67.9423	22.9398	0.00038477	0.0194558
ctg1-147017601-147017719	BosSINE6	-	4	79.3442	92.249	64.525	27.724	2.67594e-05	0.0103792
ctg1-147046085-147046297	BosSINE3	+	4	90.4305	95.7494	84.05	11.6994	0.00252352	0.0430208
ctg1-147190203-147190409	BosSINE2	-	3	85.3731	94.6265	74.2679	20.3585	0.00322149	0.0496975
ctg1-14738298-14738618	BosSINE1	-	3	69.0481	74.5662	62.2727	12.2935	0.00307205	0.0476466
ctg1-147396056-147396271	BosSINE2	+	3	89.5577	96.1015	81.4099	14.6916	9.90217e-05	0.0132745
ctg1-147484914-147485194	BosSINEL	+	10	85.9487	90.8393	79.9068	10.9325	0.000707298	0.0243453
ctg1-147500865-147501088	BosSINE3	-	4	82.8655	93.7992	70.6292	23.1701	0.000162065	0.0150402
ctg1-147503742-147503955	BosSINE2	-	3	84.4443	92.05	75.0833	16.9667	0.00117239	0.0309714
ctg1-147584066-147584289	BosSINE2	-	4	81.2289	91.2867	68.85	22.4367	0.000311152	0.0180281
ctg1-147773368-147773604	BosSINE2	+	3	61.8527	55.6175	69.5269	-13.9094	0.000200254	0.0158399
ctg1-148096615-148096868	BosSINE2	+	5	81.0145	90.6944	69.1008	21.5936	0.000126017	0.013894
ctg1-148307572-148307720	BosSINE5	-	4	72.0592	66.7172	78.7637	-12.0465	0.000200254	0.0158399
ctg1-148451993-148452136	BosSINE5	-	8	17.5701	2.22974	36.3106	-34.0808	0.000116083	0.013894
ctg1-148527373-148527601	BosSINE2	+	4	83.8659	92.6873	74.0529	18.6344	0.00237383	0.0430208
ctg1-148544701-148544878	BosSINEL	-	7	20.5689	8.99017	34.028	-25.0379	0.000126017	0.013894
ctg1-148558857-148559058	BosSINE2	+	8	89.57	94.8783	83.2716	11.6066	0.00298141	0.0468558
ctg1-148796264-148796474	BosSINE3	+	7	73.3933	78.8374	66.5903	12.2471	0.00149782	0.0334817
ctg1-148866030-148866170	BosSINE5	+	3	81.6051	88.7208	72.7167	16.0042	0.00178879	0.0363949
ctg1-149041615-149041825	BosSINE3	+	6	65.0344	78.8132	48.2444	30.5687	0.000135813	0.0148443
ctg1-149232099-149232307	BosSINE1	+	6	71.494	87.7308	51.6811	36.0497	0.000126017	0.013894
ctg1-149233748-149233875	BosSINE6	-	3	82.2386	92.9218	68.9526	23.9692	0.000731465	0.0250149
ctg1-149235157-149235283	BosSINE6	+	3	74.7453	85.5469	61.1179	24.4289	0.00212864	0.0396247
ctg1-149262567-149262668	BosSINE6	-	7	62.1061	70.8205	50.94	19.8804	0.000707298	0.0243453
ctg1-149303703-149303932	BosSINE2	-	3	75.5236	69.6479	82.7551	-13.1072	0.000176916	0.0158399
ctg1-149316644-149316748	BosSINE6	-	3	83.1879	90.3019	74.5327	15.7692	0.00298141	0.0468558
ctg1-149434792-149435003	BosSINE2	-	8	88.001	96.1026	78.0897	18.0129	0.00017594	0.0158399
ctg1-149583071-149583258	BosSINE3	-	6	80.2426	93.0001	64.0539	28.9462	0.000250236	0.0167908
ctg1-149588138-149588347	BosSINE3	-	7	88.0416	96.8236	77.51	19.3136	0.000126017	0.013894
ctg1-149781307-149781444	BosSINE2	+	5	81.3772	95.3538	64.1754	31.1784	0.000449632	0.0209513
ctg1-149781323-149781454	BosSINEL	+	5	81.3772	95.3538	64.1754	31.1784	0.000449632	0.0209513
ctg1-149793226-149793441	BosSINE3	+	3	52.0632	59.7494	42.95	16.7994	0.000200254	0.0158399
ctg1-149860403-149860546	BosSINE3	+	5	82.9675	91.6013	72.9672	18.6341	0.00108524	0.0293547
ctg1-149867264-149867475	BosSINE2	+	3	87.1508	91.7792	81.2688	10.5104	0.000793191	0.026256
ctg1-149881628-149881830	BosSINE2	+	5	80.8608	88.1076	72.6615	15.4461	0.000200254	0.0158399
ctg1-149926798-149926994	BosSINE3	-	4	67.558	73.2826	60.4571	12.8256	0.00198806	0.0394187
ctg1-150371655-150371928	BosSINEL	-	6	87.3183	92.823	80.4038	12.4192	7.73607e-05	0.0124599
ctg1-150421947-150422078	BosSINEL	+	3	83.1109	90.0979	74.5115	15.5864	0.000311152	0.0180281
ctg1-150471464-150471674	BosSINE3	+	5	82.2862	88.6988	74.3938	14.3049	0.00149782	0.0334817
ctg1-150544447-150544642	BosSINE2	-	6	74.733	88.8714	57.3321	31.5393	5.74679e-06	0.00881238
ctg1-150553070-150553377	BosSINE1	-	3	79.2298	88.0756	68.6494	19.4262	0.00038477	0.0194558
ctg1-150604693-150604906	BosSINE3	-	3	74.5726	82.9519	64.5167	18.4352	0.000126017	0.013894
ctg1-150782742-150782935	BosSINE3	+	3	26.292	11.7302	45.2253	-33.4951	0.000473624	0.0209513
ctg1-150804379-150804582	BosSINE2	+	4	40.5681	31.2586	52.026	-20.7674	1.49417e-05	0.0093863
ctg1-151034208-151034425	BosSINE2	+	3	72.5506	81.0708	62.0641	19.0067	0.00124915	0.0309714
ctg1-151048851-151049037	BosSINE3	-	4	74.0525	85.8539	59.4554	26.3985	0.00038477	0.0194558
ctg1-151163703-151163901	BosSINE3	-	3	83.8276	93.8354	71.1911	22.6443	0.000148393	0.0148443
ctg1-151164900-151165087	BosSINE3	+	5	75.011	90.396	56.1155	34.2805	0.00149782	0.0334817
ctg1-151222453-151222656	BosSINE3	-	5	89.5459	95.2987	82.4654	12.8334	0.0024763	0.0430208
ctg1-151229156-151229364	BosSINE3	+	3	89.6282	96.4437	81.2397	15.204	0.00126597	0.0309714
ctg1-151271933-151272066	BosSINE6	+	3	52.8707	44.2427	63.4897	-19.247	0.000858483	0.026256
ctg1-151275653-151275710	BosSINE3	+	4	20.9772	6.38594	38.9356	-32.5496	0.000279537	0.0180281
ctg1-151330382-151330559	BosSINE3	+	6	83.5227	89.2063	76.2805	12.9258	0.00212864	0.0396247
ctg1-151333700-151333893	BosSINE2	-	7	86.5815	96.6457	74.928	21.7177	0.00072815	0.0249993
ctg1-151450809-151451030	BosSINE2	+	3	82.6864	92.9536	69.5511	23.4025	0.00163782	0.0361388
ctg1-151466106-151466302	BosSINE3	+	4	63.2703	72.4102	51.6368	20.7734	0.00103778	0.0285926
ctg1-151503037-151503207	BosSINE3	+	3	81.4513	92.8172	66.9565	25.8607	0.000250236	0.0167908
ctg1-151835543-151835745	BosSINE2	-	3	74.5625	79.5293	67.9746	11.5547	0.00298141	0.0468558
ctg1-152348907-152349104	BosSINE3	+	3	78.4865	92.4191	62.8579	29.5612	0.00103778	0.0285926
ctg1-152378845-152379047	BosSINEL	+	4	88.6619	94.6128	80.9583	13.6545	0.00149782	0.0334817
ctg1-15240289-15240491	BosSINE3	+	4	57.7523	65.9419	47.3867	18.5552	0.00015926	0.0148443
ctg1-152640562-152640790	BosSINE2	+	5	75.1928	81.8775	66.9654	14.9121	0.000858483	0.026256
ctg1-152853701-152853894	BosSINE3	-	8	66.4923	73.1896	58.4631	14.7264	0.00252352	0.0430208
ctg1-153094369-153094442	BosSINE3	+	3	76.8772	87.5497	63.8397	23.71	0.000707298	0.0243453
ctg1-153223471-153223682	BosSINE3	-	4	36.6474	21.5297	55.2538	-33.7242	0.00038477	0.0194558
ctg1-153239482-153239770	BosSINEL	+	5	90.3249	95.8814	83.676	12.2054	0.00252352	0.0430208
ctg1-153631682-153631891	BosSINE3	-	3	77.2584	85.2694	67.4923	17.7771	0.00178879	0.0363949
ctg1-153797733-153797916	BosSINE3	-	6	61.4938	55.6388	68.3637	-12.7249	3.52765e-05	0.0107934
ctg1-153815621-153815842	BosSINE2	-	6	84.1258	94.7608	71.2724	23.4884	0.000350963	0.0194558
ctg1-153832253-153832495	BosSINEL	-	9	29.4457	20.3009	40.2085	-19.9076	0.000473624	0.0209513
ctg1-153837447-153837654	BosSINE3	+	6	88.0675	92.9443	82.0654	10.8789	0.00124915	0.0309714
ctg1-154692199-154692470	BosSINEL	-	7	80.3562	75.258	86.2314	-10.9734	0.000311152	0.0180281
ctg1-155105631-155105838	BosSINE3	-	4	68.8458	77.382	58.4698	18.9123	0.00266198	0.0446645
ctg1-155301561-155301786	BosSINE2	+	3	80.8305	89.4719	70.1949	19.277	3.52765e-05	0.0107934
ctg1-155398543-155398653	BosSINE6	-	3	79.3977	88.8365	67.7808	21.0557	0.00100266	0.0285926
ctg1-155575873-155576085	BosSINE3	-	4	85.2719	90.1633	78.4186	11.7447	0.00103778	0.0285926
ctg1-157197183-157197404	BosSINE2	+	6	77.7413	92.3633	59.9442	32.4191	7.73607e-05	0.0124599
ctg1-157281806-157282077	BosSINEL	-	8	23.2341	11.1635	39.1196	-27.9561	1.97454e-06	0.00754262
ctg1-157286070-157286250	BosSINE1	-	4	74.3047	85.2922	60.7817	24.5105	0.0024763	0.0430208
ctg1-15820725-15820987	BosSINEL	+	5	75.6508	85.4706	63.9915	21.4791	0.00038477	0.0194558
ctg1-158314885-158315113	BosSINE3	-	3	71.8426	77.6406	64.7551	12.8854	0.00100266	0.0285926
ctg1-158350792-158351064	BosSINEL	-	8	89.726	95.8996	81.7279	14.1717	0.00149782	0.0334817
ctg1-158403019-158403293	BosSINEL	+	8	85.708	91.0539	79.2034	11.8506	0.00212864	0.0396247
ctg1-158424934-158425122	BosSINE1	-	5	83.3052	87.7849	77.7696	10.0153	0.000250236	0.0167908
ctg1-1601753-1602027	BosSINEL	+	8	79.2072	89.0292	68.0142	21.015	0.000624034	0.0239174
ctg1-1615513-1615786	BosSINEL	-	6	46.3036	38.9247	55.5328	-16.6081	5.9973e-05	0.011619
ctg1-16243513-16243697	BosSINE2	+	3	69.6928	78.8266	58.1616	20.665	0.000311152	0.0180281
ctg1-17547042-17547094	BosSINE3	-	3	73.5903	86.4093	58.9051	27.5042	0.00092863	0.0278673
ctg1-18278708-18278910	BosSINE2	-	4	51.0902	59.885	40.3166	19.5684	0.00151984	0.0338594
ctg1-18282931-18283234	BosSINE1	-	3	61.3752	67.6276	53.2596	14.368	0.00298141	0.0468558
ctg1-18719773-18719964	BosSINE3	-	3	65.3236	74.9863	53.7038	21.2825	0.00038477	0.0194558
ctg1-18873779-18873986	BosSINE2	-	3	68.8893	75.328	61.1628	14.1652	0.00149782	0.0334817
ctg1-19306957-19307187	BosSINEL	-	8	90.1707	95.1582	84.3246	10.8336	0.00230253	0.0418835
ctg1-19331019-19331247	BosSINE2	-	3	60.3464	50.2604	72.7771	-22.5167	0.000311152	0.0180281
ctg1-19483184-19483377	BosSINE3	+	3	91.6463	96.8392	85.7103	11.1289	0.0014074	0.0334817
ctg1-19483610-19483668	BosSINEL	+	3	92.1986	97.2812	86.5008	10.7804	0.00136514	0.0331412
ctg1-19483680-19483846	BosSINE2	-	3	81.7681	94.1945	68.1321	26.0625	0.000776789	0.026256
ctg1-19484904-19485071	BosSINE3	+	6	59.8343	73.0093	44.4526	28.5568	3.52765e-05	0.0107934
ctg1-19629050-19629178	BosSINE3	-	3	81.1875	95.2996	65.0576	30.242	0.000299809	0.0180281
ctg1-19651315-19651475	BosSINE4	-	3	62.6726	72.9801	49.407	23.5731	0.000707298	0.0243453
ctg1-2025273-2025540	BosSINEL	-	4	26.6448	12.8073	43.7441	-30.9368	9.90217e-05	0.0132745
ctg1-20346543-20346745	BosSINE3	+	4	70.702	83.2036	55.5043	27.6993	0.000707298	0.0243453
ctg1-20374067-20374339	BosSINEL	+	5	78.4347	86.698	68.5169	18.1811	0.000580014	0.0224556
ctg1-20587196-20587467	BosSINEL	-	6	47.1603	41.6856	53.9153	-12.2297	0.00184607	0.0372002
ctg1-20770142-20770365	BosSINE2	-	3	77.936	88.2375	64.5078	23.7297	7.73607e-05	0.0124599
ctg1-20825257-20825479	BosSINE2	-	3	78.9405	84.3354	72.2684	12.067	0.00212864	0.0396247
ctg1-21540524-21540837	BosSINE1	+	5	70.1674	63.2832	78.0669	-14.7837	0.00252352	0.0430208
ctg1-21551225-21551414	BosSINEL	-	7	87.989	94.9774	78.6848	16.2925	4.62101e-05	0.0113782
ctg1-21655060-21655334	BosSINEL	-	9	15.9296	2.15882	32.8726	-30.7138	5.75934e-05	0.011619
ctg1-21656864-21657078	BosSINE2	+	4	48.5405	41.1502	57.9086	-16.7584	0.00212864	0.0396247
ctg1-2167076-2167320	BosSINE2	-	10	82.1004	88.8812	73.5352	15.3461	0.00103778	0.0285926
ctg1-2185133-2185337	BosSINE3	-	5	8.37724	2.99938	14.9962	-11.9968	0.00230253	0.0418835
ctg1-22008908-22009181	BosSINEL	+	9	18.1321	8.89755	29.0596	-20.1621	0.00252352	0.0430208
ctg1-22098976-22099178	BosSINE3	-	3	25.9571	18.8833	35.4088	-16.5255	0.00038477	0.0194558
ctg1-22251507-22251736	BosSINE2	+	5	85.5304	93.2722	76.4008	16.8714	0.000126017	0.013894
ctg1-22268889-22269101	BosSINE3	-	4	85.4011	92.7205	76.4043	16.3161	0.00038477	0.0194558
ctg1-22290647-22290920	BosSINEL	-	7	87.0854	92.7469	80.2156	12.5313	2.00696e-05	0.0097305
ctg1-22619882-22620075	BosSINE3	-	3	17.802	3.77729	34.7449	-30.9676	0.00083335	0.026256
ctg1-235690-235901	BosSINE3	-	3	21.8575	27.1354	15.3615	11.7739	4.09643e-06	0.00846538
ctg1-23679908-23680117	BosSINE2	-	3	72.3828	79.274	63.9013	15.3727	0.000858436	0.026256
ctg1-2369231-2369419	BosSINE3	+	3	68.2743	81.5426	51.7343	29.8083	0.000200254	0.0158399
ctg1-24656302-24656515	BosSINE2	-	4	80.2199	87.1705	72.241	14.9294	0.00015926	0.0148443
ctg1-2477900-2478102	BosSINE3	+	3	82.8263	90.0588	74.05	16.0088	0.00178879	0.0363949
ctg1-24973589-24973859	BosSINEL	+	7	75.6898	83.8948	65.7254	18.1695	7.73607e-05	0.0124599
ctg1-2542012-2542251	BosSINEL	-	4	74.9263	84.5359	63.099	21.4369	0.000858483	0.026256
ctg1-26378330-26378639	BosSINE1	+	3	59.8134	54.3652	66.3231	-11.9579	0.000624034	0.0239174
ctg1-2672892-2673003	BosSINE2	-	3	87.9494	93.6813	80.3069	13.3743	0.000825002	0.026256
ctg1-2696223-2696437	BosSINE2	+	5	26.0005	15.1698	39.1512	-23.9813	0.000311152	0.0180281
ctg1-26996536-26996713	BosSINEL	-	3	69.2816	76.8281	59.9936	16.8345	9.90217e-05	0.0132745
ctg1-27511501-27511678	BosSINE3	-	3	74.5253	79.302	68.9308	10.3712	0.00230253	0.0418835
ctg1-28008800-28008998	BosSINE3	+	3	73.8176	82.9626	62.5152	20.4475	0.00212864	0.0396247
ctg1-28971463-28971597	BosSINEL	+	3	39.7356	33.6646	47.2077	-13.5431	0.00178879	0.0363949
ctg1-29106572-29106767	BosSINEL	-	9	26.4683	16.2569	38.2377	-21.9808	0.000126017	0.013894
ctg1-29354060-29354322	BosSINEL	+	4	65.3313	59.7203	72.4465	-12.7262	0.00252352	0.0430208
ctg1-29466414-29466629	BosSINE2	+	4	85.9824	93.1716	77.8956	15.276	0.000200254	0.0158399
ctg1-29500900-29501100	BosSINE3	+	4	86.4168	95.0729	76.8771	18.1958	0.000486604	0.0212516
ctg1-3042790-3043004	BosSINE2	+	7	86.4883	91.6572	80.192	11.4652	0.000473624	0.0209513
ctg1-32343768-32344002	BosSINEL	+	5	71.8424	79.0191	63.1008	15.9183	0.00124915	0.0309714
ctg1-32920256-32920450	BosSINE1	-	3	35.7267	26.1748	48.565	-22.3902	0.000272385	0.0180281
ctg1-33003611-33003726	BosSINEL	+	4	83.069	87.9477	76.8817	11.0659	0.000473624	0.0209513
ctg1-33037495-33037764	BosSINEL	+	5	78.9517	84.4133	72.5956	11.8177	0.000580014	0.0224556
ctg1-33340518-33340726	BosSINE3	-	3	66.2653	76.0952	54.703	21.3922	0.00212864	0.0396247
ctg1-3458019-3458214	BosSINE2	+	7	90.2123	95.5527	83.6396	11.9131	7.73607e-05	0.0124599
ctg1-3570022-3570232	BosSINE3	+	6	78.8504	90.3192	64.8974	25.4218	0.00015926	0.0148443
ctg1-36033953-36034227	BosSINEL	-	11	19.0697	7.77728	32.5604	-24.7832	5.9973e-05	0.011619
ctg1-36158639-36158770	BosSINE6	+	3	80.2351	93.7177	63.1635	30.5542	9.90217e-05	0.0132745
ctg1-3626433-3626707	BosSINEL	+	7	88.9322	94.5284	82.0939	12.4345	0.0024763	0.0430208
ctg1-3695733-3695985	BosSINE2	+	7	80.8895	85.8826	74.9858	10.8968	0.00149782	0.0334817
ctg1-37151655-37151815	BosSINE3	-	5	74.4283	83.6894	63.03	20.6594	7.73607e-05	0.0124599
ctg1-3721759-3721840	BosSINE3	-	5	68.42	78.26	56.3092	21.9508	0.000126017	0.013894
ctg1-3728867-3729173	BosSINE1	-	6	86.1295	91.544	80.0763	11.4677	0.000580014	0.0224556
ctg1-3734573-3734780	BosSINE3	-	4	31.9856	22.1252	44.4468	-22.3216	0.000858483	0.026256
ctg1-37624760-37624894	BosSINE2	-	3	67.9083	79.5012	53.1207	26.3805	1.49417e-05	0.0093863
ctg1-3826209-3826397	BosSINEL	+	5	84.5941	95.0492	71.2735	23.7757	0.000126017	0.013894
ctg1-38331388-38331575	BosSINE1	+	6	78.6824	92.1361	62.2324	29.9038	0.00212864	0.0396247
ctg1-3835092-3835299	BosSINE2	+	6	66.1419	75.4734	54.2427	21.2307	0.00038477	0.0194558
ctg1-3835904-3836114	BosSINE3	-	3	84.5565	94.7089	72.8423	21.8666	0.0021157	0.0396247
ctg1-38595388-38595613	BosSINE2	-	3	85.4241	92.4146	76.8205	15.5941	0.000707298	0.0243453
ctg1-3859736-3859961	BosSINE2	-	5	83.2399	94.6303	69.1561	25.4742	4.10913e-05	0.0113782
ctg1-3908960-3909151	BosSINE2	+	5	73.6063	82.1671	62.9946	19.1724	0.00103778	0.0285926
ctg1-3909966-3910163	BosSINE3	-	4	77.4521	89.8984	61.7199	28.1786	0.00038477	0.0194558
ctg1-3909975-3910303	BosSINE1	-	5	77.131	87.8431	63.6159	24.2272	0.00103778	0.0285926
ctg1-39699360-39699590	BosSINE2	+	5	80.9013	76.1141	86.4745	-10.3604	3.52765e-05	0.0107934
ctg1-4008402-4008649	BosSINEL	+	7	84.3697	92.8877	74.6887	18.199	0.00252352	0.0430208
ctg1-40937280-40937471	BosSINE3	+	4	73.5801	83.7903	61.3153	22.475	0.00212864	0.0396247
ctg1-41433744-41433931	BosSINE2	+	4	75.3329	87.6307	60.6933	26.9374	0.000473624	0.0209513
ctg1-4195864-4196082	BosSINE2	+	6	24.0085	7.25723	43.8469	-36.5897	0.00286031	0.0468558
ctg1-42229890-42230098	BosSINE2	+	6	85.1631	94.2635	73.815	20.4485	2.67594e-05	0.0103792
ctg1-42263633-42263908	BosSINEL	+	7	78.3343	85.4995	69.1651	16.3344	0.000580014	0.0224556
ctg1-42520418-42520635	BosSINE2	+	3	76.8814	81.6	70.9311	10.6689	0.00149782	0.0334817
ctg1-42810264-42810447	BosSINEL	-	7	16.5573	3.52864	30.8101	-27.2814	0.000339293	0.01945
ctg1-42889404-42889566	BosSINE3	+	4	87.7012	95.8664	77.0888	18.7776	0.00026814	0.0179032
ctg1-42904456-42904723	BosSINEL	-	3	83.7002	91.6292	72.5114	19.1177	0.000473624	0.0209513
ctg1-4317161-4317382	BosSINE3	+	3	86.4085	96.8245	74.2038	22.6208	0.00172842	0.0363949
ctg1-43780408-43780675	BosSINEL	+	9	62.1029	55.4835	70.367	-14.8834	0.00178879	0.0363949
ctg1-44004820-44005018	BosSINE3	+	4	88.0967	95.7733	79.1162	16.6572	0.000272998	0.0180281
ctg1-44024261-44024391	BosSINEL	-	5	9.14894	3.77767	15.7924	-12.0147	0.0015922	0.0351628
ctg1-44545294-44545462	BosSINEL	-	4	35.2683	21.8258	52.141	-30.3152	0.000200254	0.0158399
ctg1-44554770-44554898	BosSINEL	-	6	27.1307	22.624	32.6776	-10.0536	0.00103778	0.0285926
ctg1-4456035-4456206	BosSINE5	-	3	82.3471	88.9073	74.2731	14.6342	5.99431e-05	0.011619
ctg1-4463852-4464008	BosSINE5	-	4	75.9121	86.9328	62.3481	24.5847	0.000350963	0.0194558
ctg1-45081547-45081821	BosSINEL	-	7	81.7034	87.5479	75.4324	12.1155	0.000311152	0.0180281
ctg1-4582256-4582457	BosSINE3	-	4	84.8585	93.0103	75.1362	17.8741	0.000580014	0.0224556
ctg1-46003512-46003640	BosSINE6	+	3	33.4379	40.6875	24.5154	16.1721	0.000311152	0.0180281
ctg1-4604940-4605105	BosSINE5	-	5	77.485	87.5718	65.2769	22.2949	0.00038477	0.0194558
ctg1-46056397-46056599	BosSINE2	+	6	80.0318	90.362	67.0599	23.302	5.9973e-05	0.011619
ctg1-46217313-46217574	BosSINEL	+	3	75.4466	85.0372	64.2333	20.8038	0.0024763	0.0430208
ctg1-46217619-46217767	BosSINE5	-	3	85.4371	94.706	74.6654	20.0406	0.000513959	0.022282
ctg1-46224203-46224336	BosSINEL	-	3	84.4534	95.4417	70.9295	24.5122	0.00055859	0.0224556
ctg1-46450911-46451150	BosSINEL	-	8	66.2121	56.6669	77.4865	-20.8197	9.90217e-05	0.0132745
ctg1-46551844-46552115	BosSINEL	-	5	67.1505	76.3583	56.348	20.0103	2.00696e-05	0.0097305
ctg1-46717600-46717865	BosSINEL	-	6	88.3329	93.3804	82.4444	10.936	0.00286031	0.0468558
ctg1-46862115-46862313	BosSINE2	+	3	83.3806	88.9463	76.6132	12.3331	0.00149782	0.0334817
ctg1-47092585-47092883	BosSINEL	-	5	80.724	85.9419	74.4831	11.4588	0.00103778	0.0285926
ctg1-4742393-4742611	BosSINE2	+	3	79.567	85.589	72.5301	13.0589	0.000707298	0.0243453
ctg1-48103838-48104112	BosSINEL	-	4	72.4585	78.7228	64.9144	13.8083	0.00212864	0.0396247
ctg1-51132815-51133089	BosSINEL	+	6	68.0621	62.2938	75.1582	-12.8644	0.00171346	0.0363949
ctg1-51524314-51524522	BosSINE3	+	3	78.7921	89.0005	65.7526	23.2479	0.00015926	0.0148443
ctg1-51870052-51870325	BosSINEL	+	10	79.1518	89.4255	65.9342	23.4913	0.000250236	0.0167908
ctg1-52765823-52766043	BosSINE2	-	4	78.6768	84.8971	70.7868	14.1104	0.00126597	0.0309714
ctg1-52771824-52772006	BosSINE1	+	6	81.5623	93.7886	66.7288	27.0597	0.00230253	0.0418835
ctg1-52772898-52773152	BosSINEL	+	7	79.6154	86.0318	71.917	14.1148	0.000126017	0.013894
ctg1-52778621-52778852	BosSINE3	+	3	67.1931	78.8635	52.8295	26.0341	0.00015926	0.0148443
ctg1-52790379-52790577	BosSINE2	-	4	92.4951	97.2647	86.2882	10.9765	0.000250236	0.0167908
ctg1-53405209-53405418	BosSINE3	+	3	84.9233	90.9683	77.6614	13.3068	0.0017067	0.0363949
ctg1-53611121-53611373	BosSINEL	-	7	49.2785	41.5441	58.207	-16.6629	0.00103778	0.0285926
ctg1-53621016-53621239	BosSINE2	+	4	81.217	86.6313	74.6071	12.0243	0.00252352	0.0430208
ctg1-5459100-5459315	BosSINE2	+	3	87.0911	93.5094	79.3949	14.1146	0.00212864	0.0396247
ctg1-55216131-55216343	BosSINE1	+	3	71.2594	82.147	58.1949	23.9522	0.000311152	0.0180281
ctg1-55378063-55378275	BosSINE3	+	4	76.3611	84.2804	66.7175	17.5629	0.00178879	0.0363949
ctg1-55780962-55781177	BosSINE2	+	5	59.7204	69.9338	46.1025	23.8313	4.45076e-05	0.0113782
ctg1-56110348-56110620	BosSINEL	-	4	60.5559	66.7146	53.8921	12.8225	0.00103778	0.0285926
ctg1-56193461-56193656	BosSINE2	+	3	66.5299	73.3763	58.3225	15.0538	0.00252352	0.0430208
ctg1-56276114-56276256	BosSINE3	-	3	81.8518	87.0366	75.5244	11.5122	0.00212864	0.0396247
ctg1-56587514-56587775	BosSINEL	+	5	83.1831	87.9716	77.3961	10.5755	0.00103778	0.0285926
ctg1-56695391-56695666	BosSINEL	-	7	74.8958	82.0718	66.4113	15.6606	0.00149782	0.0334817
ctg1-567124-567397	BosSINEL	-	4	73.767	79.963	66.6636	13.2994	0.000250236	0.0167908
ctg1-56826331-56826517	BosSINEL	+	6	83.8181	95.4511	70.5442	24.9069	7.21215e-05	0.0124599
ctg1-56838061-56838270	BosSINE3	+	3	75.0569	83.9698	64.0872	19.8826	3.52765e-05	0.0107934
ctg1-56944685-56944951	BosSINEL	-	8	18.4744	5.60497	32.9355	-27.3305	0.000647957	0.0243453
ctg1-57066012-57066285	BosSINEL	-	9	15.7206	7.67584	25.6765	-18.0007	1.09926e-05	0.00901759
ctg1-57237104-57237380	BosSINEL	-	9	74.3656	85.8323	60.138	25.6943	0.00038477	0.0194558
ctg1-57598224-57598426	BosSINE2	+	4	15.9608	4.37467	30.3521	-25.9774	0.000103017	0.0136341
ctg1-57689371-57689638	BosSINEL	-	10	44.4071	39.8816	49.9769	-10.0954	0.00149782	0.0334817
ctg1-5774394-5774580	BosSINE2	+	4	76.7772	84.968	66.6962	18.2718	5.9973e-05	0.011619
ctg1-58390319-58390448	BosSINE6	+	3	84.9195	92.023	76.6821	15.3409	0.000526416	0.0224556
ctg1-58432199-58432398	BosSINE2	-	10	55.8151	66.9651	42.4392	24.5259	0.00124915	0.0309714
ctg1-58447590-58447789	BosSINE3	+	3	81.0747	91.5635	68.1654	23.3982	0.000200254	0.0158399
ctg1-58520041-58520309	BosSINEL	+	8	84.4781	94.775	71.9365	22.8384	0.000311152	0.0180281
ctg1-58530059-58530281	BosSINE2	+	8	90.1364	95.3771	84.2518	11.1253	2.67594e-05	0.0103792
ctg1-58539392-58539585	BosSINEL	+	3	88.7189	95.1654	81.9718	13.1936	0.000145894	0.0148443
ctg1-58805725-58805886	BosSINE1	+	3	84.0876	91.9465	74.5338	17.4127	1.49417e-05	0.0093863
ctg1-58817980-58818186	BosSINE2	+	6	73.4149	80.7917	64.4462	16.3455	7.73607e-05	0.0124599
ctg1-59005847-59006165	BosSINE1	-	4	91.4555	96.748	84.4655	12.2825	0.0011173	0.0301938
ctg1-59265095-59265370	BosSINEL	+	8	86.9094	92.7916	80.027	12.7646	0.000580014	0.0224556
ctg1-59411396-59411622	BosSINE2	-	3	90.6069	95.4635	84.6295	10.8341	0.00230253	0.0418835
ctg1-59427355-59427628	BosSINEL	-	7	87.0166	94.2766	77.4714	16.8052	0.00298141	0.0468558
ctg1-59746166-59746388	BosSINE2	-	4	81.8641	89.042	72.6542	16.3879	0.00252352	0.0430208
ctg1-60127604-60127798	BosSINE2	-	3	73.8988	84.2554	59.3715	24.884	0.00261477	0.0444302
ctg1-6079762-6079889	BosSINEL	+	6	91.1438	96.0609	84.8138	11.2471	0.000675247	0.0243453
ctg1-60800126-60800351	BosSINE2	+	4	79.999	74.1266	87.2946	-13.1681	0.00212864	0.0396247
ctg1-62799858-62800050	BosSINE1	-	4	67.6682	73.5672	60.259	13.3082	0.00298141	0.0468558
ctg1-62957576-62957792	BosSINE2	-	3	68.3068	77.6921	55.7455	21.9466	0.000193039	0.0158399
ctg1-63040832-63041054	BosSINE2	+	3	53.7851	60.3531	45.7013	14.6518	0.000707298	0.0243453
ctg1-6388291-6388484	BosSINE2	+	5	80.9941	88.746	71.46	17.286	0.00252352	0.0430208
ctg1-63984478-63984748	BosSINEL	-	4	69.8738	78.3571	59.401	18.9561	0.000250236	0.0167908
ctg1-640099-640285	BosSINE2	+	4	76.2668	85.8703	64.4471	21.4232	0.00252352	0.0430208
ctg1-64604531-64604744	BosSINE2	-	6	80.4632	91.8755	65.8615	26.014	0.000311152	0.0180281
ctg1-6460541-6460816	BosSINEL	+	4	80.7649	85.4839	74.9302	10.5536	0.000473624	0.0209513
ctg1-64892749-64892935	BosSINE2	+	3	91.8806	98.3533	83.5886	14.7648	4.5467e-05	0.0113782
ctg1-65142462-65142739	BosSINEL	+	11	82.836	91.2112	72.1018	19.1094	0.00015926	0.0148443
ctg1-6525943-6526063	BosSINE6	+	3	82.1874	90.0219	72.5449	17.477	0.00015926	0.0148443
ctg1-65647572-65647772	BosSINE3	+	4	80.8184	86.5625	74.0122	12.5503	0.000669587	0.0243453
ctg1-6591720-6591797	BosSINE3	+	4	56.998	46.2135	70.546	-24.3326	0.000203674	0.0160668
ctg1-66224673-66224958	BosSINEL	+	3	82.2979	91.0902	71.8598	19.2304	0.00171346	0.0363949
ctg1-66713553-66713693	BosSINE2	+	3	84.2195	94.1181	72.3474	21.7707	0.000103831	0.0136341
ctg1-66746121-66746303	BosSINE4	-	5	81.2734	92.6008	67.9338	24.6669	3.52765e-05	0.0107934
ctg1-667879-668010	BosSINE6	-	3	36.6713	28.851	46.2962	-17.4451	0.00298141	0.0468558
ctg1-66947909-66948183	BosSINEL	-	8	68.1636	61.6003	76.1711	-14.5708	0.000250236	0.0167908
ctg1-67010518-67010723	BosSINE3	+	6	54.0571	46.9068	63.1456	-16.2388	0.00149782	0.0334817
ctg1-671506-671773	BosSINEL	+	5	50.3431	45.0319	56.88	-11.8481	0.000311152	0.0180281
ctg1-67837775-67837999	BosSINE2	+	3	84.8343	89.5013	79.3987	10.1026	0.000473624	0.0209513
ctg1-68020070-68020271	BosSINE3	+	4	70.2142	63.9372	77.9976	-14.0604	0.00212864	0.0396247
ctg1-6802858-6803038	BosSINE4	+	5	69.9613	84.18	51.8383	32.3417	0.000311152	0.0180281
ctg1-68278519-68278732	BosSINE3	-	3	83.2839	92.176	72.3397	19.8363	0.000200254	0.0158399
ctg1-68470082-68470288	BosSINE3	-	4	73.4571	66.9682	81.5727	-14.6046	0.000580014	0.0224556
ctg1-68482325-68482599	BosSINEL	+	11	83.8867	88.8777	77.6481	11.2296	0.00149782	0.0334817
ctg1-68689109-68689330	BosSINEL	+	8	38.5241	30.147	48.6659	-18.5189	1.49417e-05	0.0093863
ctg1-6931418-6931645	BosSINE2	+	7	90.3977	95.3911	84.1602	11.2309	0.000311152	0.0180281
ctg1-69943990-69944168	BosSINE3	+	4	88.4662	95.1305	79.4618	15.6687	0.000209401	0.0163489
ctg1-70044047-70044172	BosSINEL	+	5	54.5519	46.6105	64.1192	-17.5088	0.000858483	0.026256
ctg1-70172989-70173178	BosSINE1	+	7	49.8629	58.5217	38.336	20.1857	9.90217e-05	0.0132745
ctg1-70365443-70365611	BosSINE3	+	3	89.6023	94.6311	83.8615	10.7696	0.000646847	0.0243453
ctg1-7036770-7036953	BosSINE1	+	4	86.8596	93.6606	78.4556	15.205	0.000126017	0.013894
ctg1-70392745-70393045	BosSINEL	-	7	82.8677	90.4118	74.0505	16.3613	0.000311152	0.0180281
ctg1-7043072-7043267	BosSINE2	-	5	71.1358	75.7912	65.6274	10.1638	0.00178879	0.0363949
ctg1-70747558-70747675	BosSINE6	+	3	80.9328	94.7167	63.9679	30.7487	0.000249649	0.0167908
ctg1-70961039-70961249	BosSINE3	-	3	82.849	96.1969	66.0182	30.1787	0.0029855	0.0469163
ctg1-71009451-71009649	BosSINE2	+	4	53.1945	41.973	66.3673	-24.3943	0.000580014	0.0224556
ctg1-71012706-71012969	BosSINEL	-	8	19.5684	9.62927	31.9352	-22.3059	0.00124915	0.0309714
ctg1-71023713-71023970	BosSINEL	-	3	85.574	90.2073	79.6716	10.5357	0.00038477	0.0194558
ctg1-71203963-71204231	BosSINEL	+	9	48.66	38.5017	61.3604	-22.8588	0.000250236	0.0167908
ctg1-71227922-71228127	BosSINE2	+	7	47.5052	56.7621	36.539	20.223	4.11811e-05	0.0113782
ctg1-71284074-71284246	BosSINE3	+	8	91.9198	96.6707	86.1963	10.4743	0.0009165	0.0278673
ctg1-71679404-71679588	BosSINE3	+	3	79.158	94.8089	60.3513	34.4576	1.55623e-05	0.0097305
ctg1-72027917-72028050	BosSINEL	+	4	79.2392	87.0109	69.674	17.3369	0.000250236	0.0167908
ctg1-72242927-72243137	BosSINE3	+	4	85.6597	92.2126	77.9264	14.2862	0.00298141	0.0468558
ctg1-72358579-72358824	BosSINEL	-	5	73.3503	85.3525	58.5785	26.774	9.90217e-05	0.0132745
ctg1-72401487-72401672	BosSINE1	-	3	84.4886	95.6476	71.0051	24.6425	0.000246148	0.0167908
ctg1-72518849-72519119	BosSINEL	+	7	86.3892	92.9948	78.402	14.5928	4.62101e-05	0.0113782
ctg1-72794820-72795094	BosSINEL	-	7	84.1523	94.7155	71.3027	23.4127	8.66152e-05	0.0132745
ctg1-72815234-72815424	BosSINE3	-	7	85.2897	93.8152	75.0538	18.7613	0.00266198	0.0446645
ctg1-72905228-72905351	BosSINE5	-	6	59.9592	50.2833	71.8679	-21.5846	2.85866e-06	0.00818994
ctg1-72934660-72934846	BosSINE2	-	4	89.286	95.6857	81.7478	13.9379	0.00307205	0.0476466
ctg1-72998625-72998825	BosSINE1	+	4	81.8538	88.9478	72.6639	16.2839	0.00184607	0.0372002
ctg1-73049317-73049393	BosSINE3	-	4	80.1939	91.9303	66.449	25.4812	0.000210536	0.0163489
ctg1-73307829-73308020	BosSINE3	-	4	27.482	21.5036	34.2423	-12.7387	0.00197025	0.0394187
ctg1-73334274-73334539	BosSINEL	+	8	87.6436	92.3374	82.1437	10.1937	2.67594e-05	0.0103792
ctg1-7342939-7343067	BosSINEL	-	5	83.2217	90.9608	74.1217	16.8391	0.000126017	0.013894
ctg1-73763206-73763386	BosSINE3	-	5	84.9424	93.4644	74.4538	19.0105	0.00178879	0.0363949
ctg1-73863697-73863910	BosSINE3	+	3	67.0115	72.1604	60.6744	11.4861	0.00149782	0.0334817
ctg1-73886646-73886906	BosSINEL	+	6	83.9102	93.958	72.5733	21.3847	5.9973e-05	0.011619
ctg1-74017770-74018044	BosSINEL	-	10	78.4497	87.1431	67.75	19.3931	0.00038477	0.0194558
ctg1-74146585-74146761	BosSINE1	-	4	86.1017	90.5871	80.3372	10.2499	0.000473624	0.0209513
ctg1-74417201-74417391	BosSINEL	+	9	79.3251	91.7714	64.1459	27.6255	0.000126017	0.013894
ctg1-74923393-74923613	BosSINE2	-	3	74.0149	81.8698	64.3474	17.5224	0.00286031	0.0468558
ctg1-75155704-75155914	BosSINE2	+	4	80.2618	88.1937	70.2406	17.9531	4.62101e-05	0.0113782
ctg1-75666708-75666922	BosSINE3	+	3	65.2618	74.7617	54.1047	20.657	0.00124915	0.0309714
ctg1-75889312-75889539	BosSINE3	+	5	78.389	84.5045	70.471	14.0336	0.00103778	0.0285926
ctg1-76534000-76534115	BosSINE3	-	5	42.4724	48.575	34.9615	13.6135	0.000311152	0.0180281
ctg1-76762058-76762269	BosSINE3	-	3	78.9513	85.1169	71.2722	13.8447	0.00103778	0.0285926
ctg1-76903432-76903685	BosSINEL	-	6	85.082	91.1049	78.0149	13.09	0.00298141	0.0468558
ctg1-77033221-77033425	BosSINE3	+	3	81.2893	88.7868	72.2575	16.5293	0.000488955	0.0212516
ctg1-78448002-78448220	BosSINE2	+	4	83.6929	94.8364	69.2845	25.5519	0.00296318	0.0468558
ctg1-78564977-78565250	BosSINEL	+	4	84.8656	93.5817	74.5494	19.0323	8.35422e-05	0.0132745
ctg1-78896756-78896830	BosSINE1	-	3	83.3243	93.6311	71.4991	22.132	0.00192416	0.038679
ctg1-79016741-79016876	BosSINE2	+	3	82.7546	94.5333	68.1166	26.4168	0.00287592	0.0468558
ctg1-79197326-79197451	BosSINE2	+	5	92.0344	97.851	84.8863	12.9647	0.00277906	0.0465029
ctg1-79287162-79287435	BosSINEL	-	7	82.8334	94.7484	68.4687	26.2797	0.000580014	0.0224556
ctg1-79287792-79288012	BosSINE3	-	3	85.773	95.3823	73.9462	21.4361	7.16786e-05	0.0124599
ctg1-79289680-79289889	BosSINE3	+	3	88.9466	96.6917	79.4141	17.2776	0.00115111	0.0309714
ctg1-79349284-79349484	BosSINE3	+	4	58.37	50.4094	68.4845	-18.0751	0.00103778	0.0285926
ctg1-79349319-79349495	BosSINE2	+	3	71.1529	64.6562	79.1487	-14.4925	0.00178879	0.0363949
ctg1-79435536-79435750	BosSINE2	+	3	86.3845	91.6073	79.9564	11.6509	0.00212864	0.0396247
ctg1-7949631-7949810	BosSINE4	+	3	74.933	80.9958	66.915	14.0809	0.00038477	0.0194558
ctg1-80008242-80008385	BosSINEL	+	3	59.4029	50.0375	70.9295	-20.892	0.00212864	0.0396247
ctg1-80032016-80032276	BosSINEL	-	6	89.3432	94.308	83.2928	11.0152	0.000673181	0.0243453
ctg1-80385406-80385611	BosSINE2	+	4	82.0493	92.1925	69.2782	22.9143	0.00038477	0.0194558
ctg1-80397673-80397943	BosSINEL	-	5	84.4979	90.3875	77.2492	13.1383	0.00124915	0.0309714
ctg1-80402951-80403173	BosSINE2	-	7	88.1049	94.5432	80.4538	14.0893	0.000676282	0.0243453
ctg1-80479371-80479557	BosSINE3	+	3	82.2958	95.0049	68.6103	26.3946	0.00285751	0.0468558
ctg1-80492860-80493083	BosSINE2	-	3	89.608	94.992	83.1269	11.8651	0.00158754	0.0351234
ctg1-80530075-80530273	BosSINE3	+	3	38.0067	25.1477	53.7447	-28.597	0.000600557	0.0232129
ctg1-80532534-80532802	BosSINEL	+	7	77.816	89.4931	64.3068	25.1863	0.00149782	0.0334817
ctg1-80633656-80633928	BosSINEL	+	7	71.4223	76.7883	65.3143	11.474	0.00038477	0.0194558
ctg1-80689882-80689975	BosSINE3	+	3	24.8149	9.77187	43.3295	-33.5576	0.00230253	0.0418835
ctg1-80788332-80788548	BosSINE3	+	3	45.2592	35.1906	57.3829	-22.1922	0.00252352	0.0430208
ctg1-81149951-81150152	BosSINE2	-	3	30.8483	18.3073	46.2833	-27.976	0.00124915	0.0309714
ctg1-81620301-81620430	BosSINEL	+	7	35.3037	41.2165	28.0264	13.1901	0.00298141	0.0468558
ctg1-81633113-81633347	BosSINE2	+	4	88.0905	93.4049	82.1663	11.2386	0.000448372	0.0209513
ctg1-81633370-81633555	BosSINE1	-	6	78.2427	87.8522	66.8321	21.0201	0.000580014	0.0224556
ctg1-81755305-81755426	BosSINE2	-	4	73.7491	90.918	52.6183	38.2997	3.52765e-05	0.0107934
ctg1-81834050-81834256	BosSINE3	-	7	87.8862	97.5728	75.9643	21.6085	0.000349194	0.0194558
ctg1-81865933-81866205	BosSINEL	+	7	80.2163	86.9973	72.0614	14.9359	0.000311152	0.0180281
ctg1-81866721-81866907	BosSINE2	+	3	90.9409	95.511	84.759	10.7521	0.00156854	0.0348971
ctg1-81867114-81867315	BosSINE2	+	7	87.1937	95.8658	76.6207	19.2451	7.73607e-05	0.0124599
ctg1-82168137-82168361	BosSINE2	-	4	83.8116	92.8648	72.3844	20.4805	0.000250236	0.0167908
ctg1-82548582-82548664	BosSINE5	-	7	91.4816	96.5735	85.2027	11.3707	0.00145628	0.0334817
ctg1-82614552-82614826	BosSINEL	-	6	84.9313	91.3505	76.9855	14.365	0.00212864	0.0396247
ctg1-82627383-82627499	BosSINE1	+	4	78.175	93.3461	59.5029	33.8432	0.000225856	0.0167908
ctg1-82794634-82794845	BosSINE2	-	7	75.0117	82.18	66.4544	15.7256	5.9973e-05	0.011619
ctg1-82805220-82805528	BosSINE1	-	4	85.1184	95.0573	73.4317	21.6256	0.000209401	0.0163489
ctg1-83215907-83216100	BosSINE2	-	3	87.9626	94.8385	79.5	15.3385	4.62101e-05	0.0113782
ctg1-83238848-83239040	BosSINE3	+	5	78.411	85.7819	69.3392	16.4426	0.00038477	0.0194558
ctg1-83396475-83396748	BosSINEL	-	3	78.5429	90.5573	63.4176	27.1397	0.0013664	0.0331412
ctg1-83598063-83598190	BosSINE2	+	4	86.0444	93.4959	76.409	17.0869	0.00198042	0.0394187
ctg1-83937792-83938008	BosSINE2	+	3	78.3271	85.8771	68.805	17.0721	0.00178879	0.0363949
ctg1-86082192-86082370	BosSINE2	-	3	89.7034	96.5472	80.2325	16.3147	0.00298752	0.0469421
ctg1-86222326-86222533	BosSINE2	+	3	67.4297	74.1485	59.716	14.4325	7.73607e-05	0.0124599
ctg1-86265846-86266058	BosSINE3	+	4	74.9884	85.8008	61.6808	24.12	0.000707298	0.0243453
ctg1-87461921-87461998	BosSINE2	-	5	84.2063	95.1769	70.4897	24.6872	0.000246148	0.0167908
ctg1-87573427-87573701	BosSINEL	+	6	82.4776	90.2168	72.8948	17.322	7.73607e-05	0.0124599
ctg1-87599579-87599857	BosSINEL	-	4	85.7991	91.3324	79.1144	12.218	0.000126017	0.013894
ctg1-88012703-88012968	BosSINEL	-	5	84.8216	94.0178	73.991	20.0268	0.000449632	0.0209513
ctg1-88416896-88416977	BosSINE3	+	6	90.2994	95.3526	84.0801	11.2725	0.00092863	0.0278673
ctg1-88555324-88555531	BosSINE3	-	4	79.9284	84.4523	74.3606	10.0918	0.00038477	0.0194558
ctg1-88927888-88928110	BosSINE2	-	6	69.6765	76.399	61.3676	15.0313	1.49417e-05	0.0093863
ctg1-89022163-89022371	BosSINE3	-	3	76.4774	87.5999	62.267	25.3328	0.00015926	0.0148443
ctg1-89592521-89592655	BosSINEL	+	3	66.8787	58.2552	77.4923	-19.2371	0.000200254	0.0158399
ctg1-896032-896223	BosSINE3	+	5	77.6248	71.8925	83.8954	-12.0028	0.000580014	0.0224556
ctg1-90021815-90022016	BosSINE2	-	4	81.66	90.4432	70.9649	19.4783	0.00103778	0.0285926
ctg1-90034504-90034699	BosSINE3	-	4	79.3615	88.4271	68.3502	20.0769	0.00178879	0.0363949
ctg1-91385245-91385452	BosSINE2	-	4	69.9113	77.8697	60.1508	17.7189	7.73607e-05	0.0124599
ctg1-93231244-93231491	BosSINEL	+	5	78.7207	83.2436	73.2231	10.0205	0.000580014	0.0224556
ctg1-93731728-93731998	BosSINEL	+	3	81.8876	86.1228	75.7915	10.3312	0.00274303	0.0459673
ctg1-93991852-93991945	BosSINE3	-	4	81.3524	86.0055	75.5967	10.4088	0.00212864	0.0396247
ctg1-94928805-94929078	BosSINEL	+	8	66.35	59.4597	75.0918	-15.6321	0.00149926	0.0334817
ctg1-94987290-94987414	BosSINEL	-	3	89.1861	93.9449	83.5923	10.3526	0.00124915	0.0309714
ctg1-95247603-95247783	BosSINE3	-	3	86.2155	93.1594	77.6692	15.4901	0.00252352	0.0430208
ctg1-95435667-95435873	BosSINE3	+	3	78.4605	88.8802	65.3229	23.5573	0.00038477	0.0194558
ctg1-95686224-95686494	BosSINEL	-	9	43.2153	32.4396	56.472	-24.0324	4.62101e-05	0.0113782
ctg1-95899048-95899249	BosSINEL	-	10	45.3714	35.9631	56.8851	-20.9219	7.73607e-05	0.0124599
ctg1-96101493-96101703	BosSINE2	-	3	85.8444	91.9838	78.391	13.5928	0.00178879	0.0363949
ctg1-962499-962683	BosSINE1	+	3	92.3571	97.4271	85.5972	11.8299	0.00251463	0.0430208
ctg1-9684815-9685044	BosSINE2	+	5	73.9257	85.8274	59.2589	26.5685	0.00178879	0.0363949
ctg1-96912214-96912390	BosSINE3	+	3	77.9134	84.338	70.5192	13.8188	0.00103778	0.0285926
ctg1-97430275-97430481	BosSINE3	-	3	85.8977	90.4146	80.3385	10.0761	0.00117239	0.0309714
ctg1-97452862-97452995	BosSINE3	+	3	89.4443	94.201	83.5897	10.6113	0.00266198	0.0446645
ctg1-97539122-97539308	BosSINE2	+	3	72.7143	85.4222	58.0513	27.3709	0.00214001	0.0396247
ctg1-9794479-9794689	BosSINE2	+	3	81.6317	86.2421	75.7422	10.4999	0.000858483	0.026256
ctg1-98135823-98135939	BosSINEL	+	5	88.9239	94.3744	82.1526	12.2218	0.00214001	0.0396247
ctg1-98251756-98251954	BosSINE2	+	3	85.8983	90.4979	80.2372	10.2607	0.00298141	0.0468558
ctg1-9840309-9840451	BosSINE2	+	3	69.3805	75.2258	62.1725	13.0532	0.00178879	0.0363949
ctg1-98565883-98566097	BosSINE2	-	3	79.3645	86.3351	71.1316	15.2035	0.00298141	0.0468558
ctg1-98910400-98910674	BosSINEL	-	4	79.4063	85.0522	72.4076	12.6446	0.00298141	0.0468558
ctg1-9924107-9924304	BosSINE3	-	5	74.021	85.8256	60.0288	25.7968	0.00252352	0.0430208
ctg1-99340649-99340923	BosSINEL	-	5	78.3605	91.5018	62.0131	29.4888	9.90217e-05	0.0132745
ctg1-99370714-99370988	BosSINEL	-	5	73.1496	83.1693	60.7734	22.396	0.000200254	0.0158399
ctg1-99527823-99528036	BosSINE2	-	3	78.8892	86.1525	70.209	15.9435	0.00252352	0.0430208
ctg1-99533452-99533651	BosSINE3	-	3	73.0199	78.9499	65.9654	12.9845	0.00149782	0.0334817
ctg10-100000165-100000477	BosSINE1	+	5	82.5604	91.114	72.0036	19.1104	0.000200254	0.0158399
ctg10-100244793-100244949	BosSINE1	-	5	50.6717	58.4875	41.14	17.3475	0.000858483	0.026256
ctg10-100641866-100642015	BosSINE3	-	4	79.8268	89.9102	67.6809	22.2292	0.000858483	0.026256
ctg10-100642703-100642870	BosSINE4	+	5	81.1774	87.8023	73.1025	14.6998	0.000707298	0.0243453
ctg10-100643671-100643794	BosSINE2	-	5	75.3118	84.9291	63.6131	21.316	0.000707298	0.0243453
ctg10-101188327-101188530	BosSINE3	+	6	89.7223	94.9569	83.2042	11.7528	0.000580014	0.0224556
ctg10-101523187-101523460	BosSINEL	+	10	51.7958	41.2232	64.514	-23.2908	0.00015926	0.0148443
ctg10-101566770-101567045	BosSINEL	+	3	87.8676	94.3351	80.448	13.8871	0.000647957	0.0243453
ctg10-101775815-101776020	BosSINE3	+	8	88.9155	94.5092	82.1251	12.3841	0.000473624	0.0209513
ctg10-101853220-101853487	BosSINEL	+	10	34.8055	24.5107	47.1659	-22.6552	3.52765e-05	0.0107934
ctg10-101856934-101857136	BosSINE3	+	5	74.8039	85.4952	61.8454	23.6499	0.00015926	0.0148443
ctg10-10188204-10188467	BosSINEL	+	9	80.1004	88.7277	69.8897	18.838	0.00184607	0.0372002
ctg10-101917481-101917793	BosSINE1	+	7	91.4622	97.6965	83.5615	14.135	0.000921878	0.0278673
ctg10-101922752-101922954	BosSINE2	+	7	67.2551	72.5085	60.7521	11.7564	0.000200254	0.0158399
ctg10-101947170-101947295	BosSINE6	-	3	74.5948	85.4021	61.2936	24.1085	0.000250236	0.0167908
ctg10-101956803-101956872	BosSINE5	-	3	91.8033	97.3143	84.0242	13.29	0.0025706	0.0437839
ctg10-102026801-102026997	BosSINE3	+	8	87.2367	92.7688	80.6602	12.1086	0.00252352	0.0430208
ctg10-102031621-102031843	BosSINE2	+	6	84.1545	89.3267	77.7315	11.5951	0.00252352	0.0430208
ctg10-102101128-102101328	BosSINE2	-	8	58.7444	54.1488	64.4005	-10.2517	0.000126017	0.013894
ctg10-102175061-102175268	BosSINE3	-	7	85.7665	90.8768	79.4769	11.3999	0.00158966	0.0351234
ctg10-102276431-102276649	BosSINE3	+	3	75.2301	82.18	66.6299	15.5501	0.000200254	0.0158399
ctg10-102372790-102372975	BosSINE2	-	4	83.3434	90.9825	73.9342	17.0483	0.000200254	0.0158399
ctg10-10238588-10238862	BosSINEL	+	3	83.2519	91.7396	75.2252	16.5145	0.00174282	0.0363949
ctg10-102396577-102396797	BosSINE3	-	5	86.8568	94.5282	77.5777	16.9505	0.000348606	0.0194558
ctg10-102454830-102455038	BosSINE2	-	6	89.4861	94.4909	83.2692	11.2217	0.000580014	0.0224556
ctg10-102455787-102455908	BosSINE3	-	3	75.8971	87.4813	61.6397	25.8415	0.00298141	0.0468558
ctg10-102603330-102603555	BosSINE3	-	4	71.9126	81.6817	59.4028	22.2789	0.000858483	0.026256
ctg10-102642153-102642364	BosSINE3	+	5	82.5498	87.0706	76.7429	10.3277	0.00178879	0.0363949
ctg10-102664321-102664591	BosSINEL	-	8	26.1895	15.0523	40.2562	-25.2038	0.00178879	0.0363949
ctg10-102681935-102682121	BosSINE2	-	6	60.9009	54.3082	68.8795	-14.5713	0.00038477	0.0194558
ctg10-102695921-102696042	BosSINE6	+	5	62.0514	55.1194	70.5831	-15.4637	0.000488955	0.0212516
ctg10-102815196-102815400	BosSINE3	+	5	87.0481	95.4704	76.3777	19.0927	0.00263294	0.0446486
ctg10-103209282-103209591	BosSINE1	+	5	47.2397	53.7426	39.2994	14.4433	0.00015926	0.0148443
ctg10-103263760-103263971	BosSINE2	+	4	72.7883	77.4222	67.3817	10.0405	0.00252352	0.0430208
ctg10-1071442-1071708	BosSINEL	-	5	86.5448	92.0112	80.5319	11.4792	0.00149782	0.0334817
ctg10-10813521-10813795	BosSINEL	-	6	85.9353	90.9586	79.5132	11.4454	0.000707298	0.0243453
ctg10-10961664-10961782	BosSINE3	+	4	88.0813	93.4689	81.6692	11.7997	0.000473624	0.0209513
ctg10-1097079-1097219	BosSINE3	-	3	87.773	96.4365	76.9311	19.5054	7.73607e-05	0.0124599
ctg10-11493006-11493187	BosSINE1	-	3	60.1977	65.2833	54.6615	10.6218	0.00285688	0.0468558
ctg10-11782714-11782918	BosSINE3	-	4	81.1732	91.637	69.2889	22.348	0.000126017	0.013894
ctg10-11883892-11884108	BosSINE2	-	7	41.7091	30.4804	55.5291	-25.0488	0.00212864	0.0396247
ctg10-12100832-12100915	BosSINE2	-	4	83.2447	98.5131	69.2708	29.2423	0.00236875	0.0430115
ctg10-12240230-12240449	BosSINE2	-	7	87.6213	94.8194	78.9341	15.8853	7.73607e-05	0.0124599
ctg10-12261015-12261195	BosSINE2	+	4	73.5382	78.6409	66.8051	11.8358	0.00103778	0.0285926
ctg10-12338370-12338579	BosSINE3	+	5	76.7962	88.171	62.9985	25.1726	3.52765e-05	0.0107934
ctg10-12341479-12341591	BosSINE2	+	4	81.8127	95.4828	63.5403	31.9425	0.00229391	0.0418835
ctg10-12349801-12349937	BosSINE6	+	4	83.233	94.8708	68.9454	25.9255	0.00244891	0.0430208
ctg10-12550023-12550154	BosSINEL	+	4	86.4561	91.6394	80.122	11.5175	0.00230253	0.0418835
ctg10-12731491-12731763	BosSINEL	-	9	80.1345	88.849	69.6002	19.2488	5.9973e-05	0.011619
ctg10-12914662-12914800	BosSINE2	+	4	85.2241	90.4305	78.4963	11.9342	0.00015926	0.0148443
ctg10-1297402-1297608	BosSINE2	+	6	79.2587	94.4509	59.5756	34.8752	0.000575562	0.0224556
ctg10-13520415-13520680	BosSINEL	-	10	65.7532	57.9806	75.095	-17.1144	0.00212864	0.0396247
ctg10-13638054-13638269	BosSINE2	+	5	84.5331	93.0156	74.0931	18.9225	0.000311152	0.0180281
ctg10-13721082-13721262	BosSINEL	+	9	82.2368	92.8366	68.7318	24.1049	0.000311152	0.0180281
ctg10-13767998-13768210	BosSINE3	+	5	85.0035	95.917	71.6192	24.2978	0.000770891	0.0262286
ctg10-13779042-13779223	BosSINE4	-	4	83.3331	89.9119	75.8845	14.0275	0.00229391	0.0418835
ctg10-13850104-13850229	BosSINE6	+	4	82.4263	91.9844	70.6625	21.3219	0.000250236	0.0167908
ctg10-13876677-13876886	BosSINE3	+	4	87.5568	94.6999	78.8776	15.8224	0.000331291	0.0190115
ctg10-14094875-14095079	BosSINE3	+	6	79.7777	87.5103	70.0682	17.4421	1.09926e-05	0.00901759
ctg10-14099316-14099524	BosSINE3	+	7	84.2126	89.9022	77.2099	12.6923	0.000858483	0.026256
ctg10-14623534-14623726	BosSINE3	-	3	87.6529	96.2927	77.0192	19.2735	0.000729818	0.0250149
ctg10-14636964-14637170	BosSINE1	-	3	88.7018	94.8929	80.9092	13.9837	0.000640116	0.0243453
ctg10-14803775-14803991	BosSINE3	+	4	87.1001	92.9773	80.0141	12.9632	0.000311152	0.0180281
ctg10-14866895-14866974	BosSINE3	+	3	72.3966	64.649	81.9321	-17.2831	0.00103778	0.0285926
ctg10-15060440-15060681	BosSINEL	+	7	90.9717	95.6304	85.2222	10.4082	0.000250236	0.0167908
ctg10-15136100-15136312	BosSINE2	+	3	83.4924	91.9249	73.3282	18.5967	0.000473624	0.0209513
ctg10-15201372-15201572	BosSINE3	+	5	67.3979	78.2056	54.43	23.7756	0.00038477	0.0194558
ctg10-15403864-15404082	BosSINE2	+	4	85.0677	90.8371	78.1192	12.7178	0.00124915	0.0309714
ctg10-15433952-15434074	BosSINE6	-	3	79.4445	91.2833	64.3626	26.9207	0.00282952	0.0468558
ctg10-1545098-1545369	BosSINEL	+	5	79.6993	86.6343	71.373	15.2613	7.73607e-05	0.0124599
ctg10-15493475-15493657	BosSINE4	+	3	62.3465	70.2138	52.6692	17.5446	0.000858483	0.026256
ctg10-1555774-1556038	BosSINEL	+	7	83.8893	89.4641	77.4082	12.0558	0.00038477	0.0194558
ctg10-15977343-15977537	BosSINE3	+	3	53.3452	45.8492	62.1449	-16.2957	0.00015926	0.0148443
ctg10-16028456-16028634	BosSINEL	+	6	90.592	95.7516	84.2417	11.5099	0.000250236	0.0167908
ctg10-16205805-16206028	BosSINEL	+	7	30.3445	17.8871	45.472	-27.5848	2.67594e-05	0.0103792
ctg10-16249961-16250254	BosSINEL	+	5	48.6942	40.2771	59.8719	-19.5949	2.00696e-05	0.0097305
ctg10-16356266-16356541	BosSINEL	+	8	78.7499	91.2293	64.379	26.8503	0.000858483	0.026256
ctg10-16360774-16360986	BosSINE2	+	7	68.3989	78.2523	56.3993	21.853	0.00038477	0.0194558
ctg10-16435301-16435576	BosSINEL	-	9	48.9289	37.3219	61.9255	-24.6036	3.52765e-05	0.0107934
ctg10-16666853-16667061	BosSINE3	-	7	82.2965	87.8091	75.7489	12.0602	0.000200254	0.0158399
ctg10-16708936-16709203	BosSINEL	+	6	43.015	34.8564	53.2118	-18.3553	0.00124915	0.0309714
ctg10-1676067-1676268	BosSINE2	-	5	77.1254	83.6488	68.7678	14.881	0.00015926	0.0148443
ctg10-17337605-17337828	BosSINE2	+	4	64.1222	55.2579	75.3117	-20.0538	8.84122e-07	0.00754262
ctg10-17351833-17352089	BosSINEL	+	7	81.5052	87.9469	73.5769	14.37	7.73607e-05	0.0124599
ctg10-17645718-17645926	BosSINE3	+	3	67.3129	75.7786	56.8291	18.9496	0.000858483	0.026256
ctg10-17676035-17676234	BosSINE3	+	5	86.061	90.9104	80.1733	10.7371	0.00103778	0.0285926
ctg10-18237697-18237900	BosSINE3	-	3	71.4766	78.1074	63.1417	14.9657	0.000311152	0.0180281
ctg10-18588985-18589192	BosSINE3	-	3	74.0974	85.5592	61.8872	23.6721	0.00092863	0.0278673
ctg10-19311184-19311470	BosSINE1	+	3	56.2683	62.4171	48.6744	13.7427	0.00298141	0.0468558
ctg10-19359648-19359868	BosSINEL	+	6	77.5441	90.3128	63.6338	26.679	0.000126017	0.013894
ctg10-19361553-19361778	BosSINE2	-	4	79.9513	87.0041	71.135	15.8691	5.9973e-05	0.011619
ctg10-19572597-19572814	BosSINEL	-	7	63.8794	58.6303	70.9412	-12.3109	0.000473624	0.0209513
ctg10-19580196-19580461	BosSINEL	+	9	85.4735	94.6466	74.3885	20.2582	0.000473624	0.0209513
ctg10-19898350-19898512	BosSINE1	-	3	80.0557	86.5729	72.0346	14.5383	0.00108524	0.0293547
ctg10-19922252-19922431	BosSINE4	+	3	67.2115	74.3844	58.3833	16.001	0.00149782	0.0334817
ctg10-20281913-20282108	BosSINE3	+	5	84.586	92.3962	75.2258	17.1705	0.000311152	0.0180281
ctg10-20339683-20339956	BosSINEL	-	3	84.2985	89.6165	77.9614	11.6551	0.0010314	0.0285926
ctg10-20352799-20353000	BosSINE3	-	5	85.5727	94.3593	75.1092	19.2501	0.00212864	0.0396247
ctg10-20648739-20649043	BosSINEL	+	9	75.5594	88.4859	60.2173	28.2685	0.000707298	0.0243453
ctg10-20658421-20658650	BosSINEL	-	6	89.4471	94.2645	83.5506	10.7138	0.00124915	0.0309714
ctg10-20659220-20659493	BosSINEL	-	9	67.2015	76.2813	56.1439	20.1374	0.00124915	0.0309714
ctg10-20877987-20878114	BosSINE3	+	3	24.2121	18.4156	31.3462	-12.9305	0.000450363	0.0209513
ctg10-2092835-2093109	BosSINEL	+	9	84.1421	93.3817	73.6142	19.7675	0.000575562	0.0224556
ctg10-20949644-20949758	BosSINEL	-	8	88.9442	95.8184	80.6769	15.1415	0.00126597	0.0309714
ctg10-20961089-20961174	BosSINE2	+	3	57.3443	64.676	48.3205	16.3555	0.00149782	0.0334817
ctg10-21203099-21203364	BosSINE1	+	3	51.999	60.8503	41.3274	19.5228	0.00298141	0.0468558
ctg10-21261610-21261879	BosSINEL	-	11	31.993	18.5653	49.1146	-30.5493	2.67594e-05	0.0103792
ctg10-21289238-21289391	BosSINE6	-	3	73.554	79.55	66.1744	13.3756	0.000707298	0.0243453
ctg10-21484592-21484727	BosSINE2	+	3	86.4125	92.1311	79.8141	12.317	0.00220078	0.0406247
ctg10-21719123-21719337	BosSINE3	+	5	82.3317	95.1444	66.5623	28.5821	0.000227883	0.0167908
ctg10-21737487-21737716	BosSINE2	-	4	71.7311	82.2913	58.4193	23.872	8.84122e-07	0.00754262
ctg10-21742871-21743097	BosSINE2	-	4	21.8721	13.1942	32.1269	-18.9327	0.000473624	0.0209513
ctg10-21964798-21964987	BosSINE2	+	3	75.0997	89.2029	58.0515	31.1514	0.000590823	0.0228624
ctg10-22000779-22000991	BosSINE3	+	6	91.8503	96.7515	85.8652	10.8863	0.000673181	0.0243453
ctg10-22052353-22052526	BosSINEL	-	5	82.1663	90.4926	71.7605	18.7321	0.000676282	0.0243453
ctg10-22075880-22076154	BosSINEL	+	6	90.7844	95.718	85.0455	10.6725	0.00147414	0.0334817
ctg10-22429659-22429786	BosSINEL	+	7	34.0121	26.3396	45.0077	-18.668	0.000580014	0.0224556
ctg10-22616925-22617200	BosSINEL	+	8	40.5474	31.0978	51.6042	-20.5064	0.00212864	0.0396247
ctg10-22859863-22860074	BosSINE2	+	4	51.6201	57.2127	45.4478	11.7649	0.00178879	0.0363949
ctg10-23238976-23239186	BosSINE1	-	3	66.4317	76.3438	54.5513	21.7925	0.00117239	0.0309714
ctg10-23391159-23391322	BosSINE2	+	4	70.7519	77.4533	62.6273	14.826	0.00212864	0.0396247
ctg10-25404648-25404893	BosSINEL	-	6	71.3351	76.0091	65.623	10.386	0.000250236	0.0167908
ctg10-25499376-25499585	BosSINE2	-	4	77.611	82.5036	72.0481	10.4555	0.000858483	0.026256
ctg10-25669317-25669514	BosSINEL	-	5	77.4015	84.366	68.3173	16.0488	0.00147215	0.0334817
ctg10-25691663-25691720	BosSINE2	-	4	85.2786	93.2516	75.2907	17.9609	0.000200254	0.0158399
ctg10-26088523-26088658	BosSINE2	+	5	76.1317	70.3939	83.5844	-13.1906	0.000473624	0.0209513
ctg10-26217285-26217552	BosSINEL	+	7	28.2852	17.8778	40.9835	-23.1057	0.000858483	0.026256
ctg10-26292180-26292398	BosSINE2	+	3	75.2735	70.3619	81.2051	-10.8432	0.000858483	0.026256
ctg10-26346900-26347169	BosSINEL	+	4	86.6678	92.6657	80.4739	12.1919	0.00140547	0.0334817
ctg10-26405128-26405244	BosSINE2	-	3	82.1879	95.4021	65.9244	29.4777	0.000414629	0.0205211
ctg10-26411322-26411470	BosSINEL	+	6	54.2226	62.2766	44.289	17.9876	0.00038477	0.0194558
ctg10-26593224-26593435	BosSINE3	-	3	82.0732	90.8479	70.3736	20.4743	0.00038477	0.0194558
ctg10-26708525-26708784	BosSINEL	-	9	78.0999	83.5576	71.5459	12.0117	0.000858483	0.026256
ctg10-26846451-26846725	BosSINEL	+	8	87.4804	92.2543	81.7586	10.4957	0.000858483	0.026256
ctg10-27394728-27394932	BosSINE3	-	4	81.865	88.5476	73.7562	14.7914	0.000825002	0.026256
ctg10-27414870-27415132	BosSINEL	-	5	82.8942	88.414	75.7423	12.6718	0.00103778	0.0285926
ctg10-27575057-27575255	BosSINE2	-	3	86.1006	91.2031	79.8205	11.3826	0.00212864	0.0396247
ctg10-27637500-27637717	BosSINE2	-	4	58.3457	63.5461	51.9452	11.6009	0.000858483	0.026256
ctg10-27877766-27877966	BosSINE3	+	3	72.3293	81.4937	61.0005	20.4931	0.000580014	0.0224556
ctg10-28029875-28030072	BosSINE3	-	4	66.3534	75.4018	55.7173	19.6845	0.000311152	0.0180281
ctg10-28228652-28228840	BosSINE2	-	6	81.108	89.1005	71.2712	17.8294	4.62101e-05	0.0113782
ctg10-28306382-28306592	BosSINE3	-	6	22.0487	9.66458	36.8687	-27.2041	7.73607e-05	0.0124599
ctg10-28307323-28307494	BosSINE1	+	3	15.6178	8.96667	23.8092	-14.8425	0.000473624	0.0209513
ctg10-28428140-28428404	BosSINEL	+	12	92.0237	98.1879	84.6059	13.582	0.000197928	0.0158399
ctg10-28625449-28625721	BosSINEL	-	10	38.6129	28.6949	50.9319	-22.237	0.00298141	0.0468558
ctg10-28812215-28812267	BosSINE1	-	5	91.3327	97.4707	83.8769	13.5937	0.000567478	0.0224556
ctg10-29493919-29494138	BosSINE3	-	4	77.7184	90.15	62.1185	28.0315	0.00015926	0.0148443
ctg10-29554235-29554508	BosSINEL	+	11	79.7065	91.9471	64.7451	27.202	0.000473624	0.0209513
ctg10-30034331-30034524	BosSINE1	+	4	74.286	81.4403	65.797	15.6433	0.00252352	0.0430208
ctg10-30088316-30088441	BosSINE2	+	3	53.5736	61.6938	43.5795	18.1143	0.00149782	0.0334817
ctg10-30321988-30322183	BosSINE3	-	4	73.5086	80.929	64.7385	16.1905	0.00100411	0.0285926
ctg10-30378623-30378808	BosSINE2	+	3	92.277	96.9604	86.5128	10.4476	0.000279048	0.0180281
ctg10-30536106-30536288	BosSINE2	-	4	86.3488	93.4122	78.1144	15.2978	0.000858483	0.026256
ctg10-30536123-30536329	BosSINE3	-	4	86.3488	93.4122	78.1144	15.2978	0.000858483	0.026256
ctg10-31026895-31027158	BosSINEL	+	9	73.62	83.1195	62.497	20.6225	0.00298141	0.0468558
ctg10-31612075-31612207	BosSINEL	-	6	86.891	91.3438	81.1264	10.2174	0.000169615	0.0156985
ctg10-32557254-32557440	BosSINE3	-	4	80.7301	86.2094	73.8904	12.319	4.09643e-06	0.00846538
ctg10-32863077-32863188	BosSINE2	-	3	83.5262	89.3694	77.0107	12.3587	0.00247324	0.0430208
ctg10-32880776-32880879	BosSINE3	+	3	81.2605	90.7938	67.3939	23.3998	0.00158321	0.0351234
ctg10-33637304-33637501	BosSINE3	+	3	79.3276	86.7812	70.1538	16.6274	0.00178879	0.0363949
ctg10-33805255-33805383	BosSINE2	-	3	46.8	51.8023	40.2532	11.5491	0.000707298	0.0243453
ctg10-33845546-33845755	BosSINE3	+	8	52.5368	61.6272	41.4317	20.1955	4.09643e-06	0.00846538
ctg10-33855775-33856047	BosSINEL	+	5	50.1945	43.0269	59.0162	-15.9893	0.000200254	0.0158399
ctg10-34292776-34292992	BosSINE2	+	3	72.6673	79	64.5043	14.4957	0.00117239	0.0309714
ctg10-34317094-34317300	BosSINE3	-	4	86.3282	92.7893	78.8856	13.9038	0.00229966	0.0418835
ctg10-34447609-34447857	BosSINEL	+	6	78.0175	88.6975	64.9159	23.7817	0.00038477	0.0194558
ctg10-35173202-35173405	BosSINE3	-	4	61.576	56.236	68.2708	-12.0348	0.00212864	0.0396247
ctg10-3536923-3537107	BosSINE2	-	3	66.7109	80.6188	49.1312	31.4876	4.62101e-05	0.0113782
ctg10-35440282-35440485	BosSINE3	+	3	79.5768	85.424	72.0851	13.3388	0.00149782	0.0334817
ctg10-35440598-35440795	BosSINE3	-	3	88.9034	95.7865	80.4321	15.3544	0.000571959	0.0224556
ctg10-35486778-35486997	BosSINE2	+	3	82.208	87.8302	75.2885	12.5417	3.52765e-05	0.0107934
ctg10-35843385-35843575	BosSINE3	-	5	81.748	91.7545	69.5585	22.196	0.000296533	0.0180281
ctg10-35851807-35852082	BosSINEL	-	8	77.0943	83.8813	68.8048	15.0765	0.00015926	0.0148443
ctg10-35966098-35966320	BosSINE2	+	5	83.65	91.9856	73.3908	18.5949	0.000858483	0.026256
ctg10-36097874-36097999	BosSINE3	+	3	89.0518	94.7596	81.8308	12.9288	0.000296533	0.0180281
ctg10-36146614-36146827	BosSINE3	+	3	71.2857	66.625	77.0692	-10.4442	0.0013664	0.0331412
ctg10-36364464-36364734	BosSINEL	-	5	86.9632	91.6252	81.1349	10.4903	0.000707298	0.0243453
ctg10-36392784-36392995	BosSINE2	+	4	83.4961	91.2203	73.9894	17.2309	0.00149782	0.0334817
ctg10-36405987-36406259	BosSINEL	+	6	83.1371	92.8612	71.8803	20.9809	0.00038477	0.0194558
ctg10-36409118-36409236	BosSINEL	+	4	80.8875	94.8648	63.6846	31.1802	0.000103831	0.0136341
ctg10-36491294-36491520	BosSINE2	+	4	89.6892	97.1555	80.5	16.6555	0.000727047	0.0249705
ctg10-36722476-36722737	BosSINEL	-	4	83.0799	95.3788	68.2077	27.1711	0.000162065	0.0150402
ctg10-36763562-36763832	BosSINEL	-	6	77.3055	88.799	63.1596	25.6393	7.73607e-05	0.0124599
ctg10-36863200-36863395	BosSINE1	+	6	15.9305	8.84378	24.4186	-15.5748	0.00038477	0.0194558
ctg10-37050355-37050577	BosSINE2	-	3	51.4886	41.8438	63.508	-21.6643	0.000250236	0.0167908
ctg10-37319156-37319366	BosSINE2	+	4	82.9401	92.8797	70.7067	22.173	0.000707298	0.0243453
ctg10-3732028-3732186	BosSINE3	-	4	78.1916	87.7606	64.9573	22.8033	0.00252352	0.0430208
ctg10-37432589-37432798	BosSINE3	-	4	87.1586	92.5914	80.4721	12.1193	0.00298141	0.0468558
ctg10-37479938-37480175	BosSINE2	-	3	87.9936	92.6498	82.5487	10.1011	0.00198806	0.0394187
ctg10-37626159-37626365	BosSINE1	+	3	84.1188	88.799	78.2799	10.519	0.000858483	0.026256
ctg10-37732397-37732833	BosSINEL	+	9	76.6802	84.5371	67.0605	17.4766	0.000311152	0.0180281
ctg10-37801899-37802029	BosSINEL	-	6	74.4035	67.9479	82.436	-14.488	0.00298141	0.0468558
ctg10-37823419-37823685	BosSINEL	+	6	55.6336	45.8328	67.6962	-21.8633	1.09926e-05	0.00901759
ctg10-37905818-37905984	BosSINEL	-	6	88.7692	94.4367	81.9122	12.5245	0.000250236	0.0167908
ctg10-37945345-37945551	BosSINE2	+	7	25.6401	30.653	19.5644	11.0886	0.00252352	0.0430208
ctg10-38938712-38938832	BosSINEL	-	4	72.4405	77.4976	66.5428	10.9548	0.00212864	0.0396247
ctg10-3897841-3898113	BosSINEL	+	14	84.2178	89.8947	77.4223	12.4724	0.00124915	0.0309714
ctg10-3899626-3899831	BosSINE3	+	6	87.6406	92.7307	81.4507	11.28	0.000311152	0.0180281
ctg10-3978121-3978222	BosSINE2	-	3	83.5564	93.3083	71.0838	22.2246	0.000126017	0.013894
ctg10-3983050-3983255	BosSINE3	-	6	86.0978	92.4728	78.3244	14.1485	0.00298141	0.0468558
ctg10-40006319-40006449	BosSINEL	-	6	80.6183	91.1127	67.4623	23.6504	0.00265228	0.0446645
ctg10-4011721-4011968	BosSINEL	-	6	43.0629	33.6307	54.6495	-21.0187	0.00124915	0.0309714
ctg10-4024820-4025088	BosSINEL	-	7	90.8013	95.5034	85.2277	10.2757	0.000473624	0.0209513
ctg10-40459803-40460072	BosSINEL	-	5	80.7931	88.2259	70.3796	17.8462	0.000707298	0.0243453
ctg10-40471978-40472252	BosSINEL	+	4	86.2144	92.1531	79.2125	12.9406	0.000414629	0.0205211
ctg10-41346060-41346134	BosSINE3	-	3	18.0839	5.74896	33.2654	-27.5164	0.0014366	0.0334817
ctg10-41384641-41384915	BosSINEL	+	7	24.2312	11.4892	39.0752	-27.5859	0.00298141	0.0468558
ctg10-4162641-4162917	BosSINEL	+	7	88.9446	94.4196	82.206	12.2136	0.000250236	0.0167908
ctg10-41681999-41682199	BosSINE2	+	3	82.9895	89.2994	74.2154	15.084	0.00307205	0.0476466
ctg10-41776549-41776750	BosSINE2	+	3	65.9684	73.8798	56.2422	17.6377	0.000580014	0.0224556
ctg10-42019294-42019507	BosSINE3	+	5	71.3617	79.9542	60.2205	19.7337	0.00124915	0.0309714
ctg10-42088095-42088300	BosSINE3	+	4	68.0553	74.9093	60.305	14.6044	0.000473624	0.0209513
ctg10-4239286-4239496	BosSINE3	-	6	82.4038	91.8055	70.6269	21.1786	0.000311152	0.0180281
ctg10-42465779-42465835	BosSINE2	-	3	85.5468	94.3735	75.1897	19.1838	0.00147414	0.0334817
ctg10-42645009-42645150	BosSINE2	-	6	33.7359	39.3682	26.8038	12.5644	0.00298141	0.0468558
ctg10-42706471-42706645	BosSINE3	-	4	79.1875	88.2734	68.0048	20.2686	0.00103778	0.0285926
ctg10-4275393-4275518	BosSINE2	+	3	62.6011	72.5354	50.3744	22.1611	0.000286946	0.0180281
ctg10-42984755-42985006	BosSINEL	-	4	89.2261	94.7502	82.4087	12.3416	0.00124915	0.0309714
ctg10-43045511-43045784	BosSINEL	+	8	91.9293	96.9273	85.8274	11.0999	0.000473624	0.0209513
ctg10-43254127-43254400	BosSINEL	-	6	71.0156	65.699	77.5011	-11.8021	0.00212864	0.0396247
ctg10-43294955-43295228	BosSINEL	-	5	48.134	39.872	57.2262	-17.3542	0.000707298	0.0243453
ctg10-4346002-4346262	BosSINEL	-	6	87.6086	95.4237	78.1672	17.2565	3.95004e-05	0.0113782
ctg10-43603784-43604059	BosSINEL	+	8	85.3819	92.2467	76.9868	15.2599	0.00103778	0.0285926
ctg10-43729880-43730071	BosSINE3	+	5	62.1739	74.7273	46.034	28.6933	0.00171346	0.0363949
ctg10-43776335-43776750	BosSINEL	+	10	79.4038	87.4994	70.1155	17.3839	0.000580014	0.0224556
ctg10-44094754-44094967	BosSINE3	-	6	79.8619	92.4668	64.3106	28.1562	4.62101e-05	0.0113782
ctg10-44330939-44331132	BosSINE3	+	3	78.6316	90.4866	62.2667	28.2199	0.00312165	0.0483505
ctg10-4456334-4456469	BosSINE5	-	3	78.119	72.8917	84.5205	-11.6288	5.9973e-05	0.011619
ctg10-44682963-44683120	BosSINE1	+	4	88.7887	95.3547	80.572	14.7827	0.00146817	0.0334817
ctg10-45083654-45083922	BosSINEL	-	8	83.407	94.2374	70.1293	24.1081	3.52765e-05	0.0107934
ctg10-45465204-45465417	BosSINE2	-	4	77.2746	88.6758	63.2423	25.4335	0.000126017	0.013894
ctg10-45520088-45520211	BosSINE6	+	4	87.8661	95.6386	77.5752	18.0634	0.000874771	0.0267456
ctg10-45557648-45557847	BosSINE2	+	3	86.0802	95.0431	75.4256	19.6174	0.000667008	0.0243453
ctg10-45575365-45575645	BosSINEL	-	7	65.311	71.268	57.9039	13.3641	0.000473624	0.0209513
ctg10-45583509-45583625	BosSINE6	-	3	17.519	5.76875	31.9808	-26.212	0.000676282	0.0243453
ctg10-45663582-45663774	BosSINE3	-	4	84.1457	93.5122	73.0227	20.4895	3.40393e-05	0.0107934
ctg10-45989486-45989694	BosSINE2	+	3	85.927	90.8275	79.9038	10.9237	0.00212864	0.0396247
ctg10-4636469-4636736	BosSINEL	-	9	76.5292	88.3895	62.5622	25.8273	0.000473624	0.0209513
ctg10-46688952-46689089	BosSINE5	-	3	86.527	91.3979	80.5321	10.8659	0.00214001	0.0396247
ctg10-46707477-46707545	BosSINE2	+	3	63.2276	72.0417	52.3795	19.6622	0.000624034	0.0239174
ctg10-46926385-46926650	BosSINEL	+	7	44.7579	33.2821	58.8819	-25.5997	9.90217e-05	0.0132745
ctg10-47014932-47014954	BosSINE2	+	6	88.0426	94.7625	78.5712	16.1913	0.000900954	0.0274994
ctg10-47181129-47181368	BosSINE2	+	5	73.7	86.9595	56.6893	30.2702	0.000200254	0.0158399
ctg10-47195695-47195902	BosSINE3	-	5	75.4972	83.79	65.3657	18.4243	0.00212864	0.0396247
ctg10-47254973-47255185	BosSINE3	+	5	73.7134	79.2031	66.9569	12.2462	0.00038477	0.0194558
ctg10-47332016-47332228	BosSINE2	-	4	74.0707	84.5969	61.3279	23.269	0.00252352	0.0430208
ctg10-47420211-47420404	BosSINE3	+	3	73.8229	85.4985	58.9877	26.5108	0.00212864	0.0396247
ctg10-47443217-47443405	BosSINE3	-	5	75.1146	86.5494	60.7806	25.7687	0.000580014	0.0224556
ctg10-47655837-47655953	BosSINE3	+	3	84.9891	94.2365	73.6077	20.6288	2.67594e-05	0.0103792
ctg10-47713282-47713488	BosSINE2	+	3	86.7038	91.4089	80.8265	10.5824	0.000580014	0.0224556
ctg10-47716448-47716573	BosSINE6	+	5	80.7261	92.2089	67.4065	24.8024	1.49417e-05	0.0093863
ctg10-47762131-47762337	BosSINE3	+	3	55.2605	67.275	39.9985	27.2765	8.01604e-06	0.00881238
ctg10-47901894-47901998	BosSINE5	+	3	62.6483	55.4562	71.5	-16.0437	3.74489e-05	0.011357
ctg10-48025176-48025397	BosSINE3	-	4	79.8704	86.3912	72.4529	13.9383	0.00230253	0.0418835
ctg10-48933788-48934002	BosSINE1	+	5	82.0143	88.4313	73.9587	14.4725	0.00298141	0.0468558
ctg10-49546840-49547038	BosSINE1	+	3	83.2879	90.551	74.3487	16.2023	0.00266198	0.0446645
ctg10-49708982-49709184	BosSINE3	+	3	91.8138	98.1312	84.0385	14.0928	0.000814865	0.026256
ctg10-49798608-49798809	BosSINE3	+	3	76.3218	91.5135	57.6244	33.8892	0.00147414	0.0334817
ctg10-49828241-49828448	BosSINE3	-	3	82.167	90.8364	71.6505	19.1859	0.000126017	0.013894
ctg10-50054082-50054274	BosSINE3	+	3	69.4107	82.889	52.1675	30.7215	2.67594e-05	0.0103792
ctg10-50469580-50469739	BosSINEL	-	4	80.5287	88.9673	69.9729	18.9944	0.00123425	0.0309714
ctg10-50489117-50489306	BosSINE1	+	3	30.4774	22.7063	39.7872	-17.0809	0.000707298	0.0243453
ctg10-5081190-5081449	BosSINEL	+	7	34.7378	23.1087	48.5636	-25.4549	5.9973e-05	0.011619
ctg10-51326549-51326685	BosSINEL	-	7	4.88354	0.42551	10.8734	-10.4478	5.99042e-05	0.011619
ctg10-51869572-51869691	BosSINEL	+	4	87.2151	97.0367	75.1269	21.9098	2.265e-05	0.0103792
ctg10-51940026-51940246	BosSINE2	-	5	84.6651	91.1545	77.4928	13.6616	0.00103778	0.0285926
ctg10-52029731-52029947	BosSINE2	-	5	90.4565	95.9319	83.4746	12.4573	0.000349194	0.0194558
ctg10-5212499-5212689	BosSINE2	-	4	77.6108	88.0156	64.8048	23.2108	0.00298141	0.0468558
ctg10-52696510-52696717	BosSINE2	+	4	84.5845	93.6414	73.4375	20.2039	0.000126017	0.013894
ctg10-52705274-52705393	BosSINE6	+	3	78.0908	87.6646	66.3077	21.3569	9.90217e-05	0.0132745
ctg10-52711291-52711531	BosSINEL	-	5	80.1396	86.8575	72.0546	14.8029	0.000858483	0.026256
ctg10-52717622-52717789	BosSINE3	-	5	76.4678	84.3236	66.8438	17.4798	0.000126017	0.013894
ctg10-5369125-5369266	BosSINE2	+	3	87.5492	92.7875	80.9638	11.8237	0.000350963	0.0194558
ctg10-5396010-5396200	BosSINE2	-	3	83.1204	92.102	72.5385	19.5636	0.000414629	0.0205211
ctg10-5396316-5396591	BosSINEL	-	7	91.2076	96.8116	85.32	11.4917	0.00106627	0.0293027
ctg10-5398334-5398605	BosSINEL	-	3	85.6864	90.5641	79.2788	11.2853	0.00126597	0.0309714
ctg10-5411642-5411837	BosSINE3	+	3	34.244	22.6837	48.1077	-25.424	0.00212864	0.0396247
ctg10-54416970-54417082	BosSINE2	+	3	86.6606	96.6776	75.0594	21.6182	0.000980743	0.0285926
ctg10-54416992-54417093	BosSINE3	+	4	87.2959	96.594	76.5349	20.0591	0.000980972	0.0285926
ctg10-55348887-55349085	BosSINE1	+	3	77.2713	84.5584	68.3095	16.2489	2.85866e-06	0.00818994
ctg10-55405721-55405950	BosSINE2	-	4	83.5457	88.9586	76.8837	12.0749	0.000200254	0.0158399
ctg10-55409555-55409749	BosSINEL	-	4	77.0826	71.2531	84.8038	-13.5507	0.000311152	0.0180281
ctg10-55416471-55416742	BosSINEL	-	6	91.3258	96.3141	85.2386	11.0755	0.0021373	0.0396247
ctg10-55463664-55463864	BosSINE2	+	3	80.9281	88.9833	71.8694	17.1139	0.00145936	0.0334817
ctg10-55939860-55940133	BosSINEL	-	8	25.3673	12.8951	41.0286	-28.1335	0.000250236	0.0167908
ctg10-55940018-55940147	BosSINE2	-	5	27.5735	14.8569	43.3782	-28.5213	0.00177906	0.0363949
ctg10-56096016-56096285	BosSINEL	-	7	80.8995	89.8897	70.1413	19.7483	0.00015926	0.0148443
ctg10-5692173-5692304	BosSINEL	-	3	86.5632	93.2812	78.2949	14.9864	0.000295004	0.0180281
ctg10-5711938-5712080	BosSINE3	+	5	71.3062	81.2672	59.32	21.9472	0.00212864	0.0396247
ctg10-57571110-57571323	BosSINE3	+	3	62.3893	74.1157	47.9269	26.1888	0.000311152	0.0180281
ctg10-57581967-57582140	BosSINEL	-	5	84.5134	89.5054	78.7758	10.7296	0.00149782	0.0334817
ctg10-581867-582272	BosSINEL	+	10	84.4581	90.4834	77.6793	12.8041	0.000707298	0.0243453
ctg10-5825816-5826018	BosSINE2	-	3	84.278	90.0322	77.7417	12.2906	0.000207853	0.0163489
ctg10-58376752-58376879	BosSINE2	-	3	28.25	7.62396	53.6359	-46.0119	6.52223e-05	0.0124599
ctg10-58401221-58401403	BosSINE2	+	5	89.8212	96.0981	81.9766	14.1215	0.000414629	0.0205211
ctg10-58623990-58624183	BosSINE3	+	3	86.6345	91.6522	80.8449	10.8074	0.00313508	0.048485
ctg10-58640962-58641171	BosSINE3	-	3	87.2435	93.5849	79.5513	14.0336	1.32618e-06	0.00754262
ctg10-58710272-58710487	BosSINE3	+	4	85.4364	91.5299	77.4294	14.1006	0.00101178	0.0285926
ctg10-59403854-59404050	BosSINE3	-	3	84.6477	92.9619	74.3915	18.5705	0.00298141	0.0468558
ctg10-5993553-5993810	BosSINEL	-	7	78.2778	84.4648	71.3143	13.1505	0.00149782	0.0334817
ctg10-60142255-60142529	BosSINEL	+	9	24.7183	13.3178	38.3898	-25.072	0.00298141	0.0468558
ctg10-60332840-60333043	BosSINE2	+	3	86.8866	92.8689	79.5002	13.3687	0.000707298	0.0243453
ctg10-60693498-60693718	BosSINE3	+	4	88.7893	94.1494	82.6962	11.4533	0.00149782	0.0334817
ctg10-60758370-60758572	BosSINE3	-	3	20.6541	4.91917	39.1397	-34.2206	0.000221443	0.0167908
ctg10-60989163-60989406	BosSINE2	+	5	91.5793	97.1762	84.6908	12.4855	0.00108061	0.0293547
ctg10-61087187-61087449	BosSINEL	-	9	17.7941	11.848	24.8406	-12.9926	0.00103778	0.0285926
ctg10-61372689-61372882	BosSINEL	-	11	13.7455	6.24048	23.0233	-16.7828	0.000311152	0.0180281
ctg10-61428987-61429242	BosSINEL	+	9	80.518	85.3881	74.5701	10.818	5.9973e-05	0.011619
ctg10-61504133-61504400	BosSINEL	+	10	85.1461	95.6347	71.9602	23.6746	0.000530614	0.0224556
ctg10-62052822-62053089	BosSINEL	+	8	73.4419	79.5301	66.0779	13.4522	0.000580014	0.0224556
ctg10-62161532-62161739	BosSINE3	+	5	76.7714	87.4216	63.8132	23.6084	0.000793191	0.026256
ctg10-62668828-62668998	BosSINEL	+	9	78.7139	90.2878	65.0585	25.2293	0.000473624	0.0209513
ctg10-62688562-62688769	BosSINE3	-	4	82.1034	87.3266	75.675	11.6516	0.00212864	0.0396247
ctg10-62820368-62820580	BosSINE3	+	3	37.4264	24.249	53.6449	-29.3959	0.00092863	0.0278673
ctg10-6284862-6284934	BosSINE2	+	7	61.1798	70.0027	50.5272	19.4755	0.00252352	0.0430208
ctg10-62996689-62996910	BosSINE2	-	4	51.4861	42.9242	62.274	-19.3497	0.000707298	0.0243453
ctg10-63167518-63167791	BosSINEL	+	5	79.9031	84.5337	74.2038	10.3299	0.000858483	0.026256
ctg10-64405252-64405379	BosSINE2	+	4	75.1575	86.5518	62.0962	24.4557	0.00103778	0.0285926
ctg10-6445084-6445298	BosSINE2	-	3	49.4591	62.5767	33.6186	28.9581	0.0024763	0.0430208
ctg10-64833914-64834188	BosSINEL	+	11	90.7868	97.7327	82.5359	15.1968	0.000113605	0.013894
ctg10-64851597-64851736	BosSINEL	-	4	75.8907	86.4325	62.9785	23.454	1.49417e-05	0.0093863
ctg10-65097243-65097507	BosSINEL	+	8	86.4358	94.1621	76.9264	17.2357	0.000126017	0.013894
ctg10-65233836-65234102	BosSINEL	-	10	10.306	5.29106	16.4285	-11.1374	0.000707298	0.0243453
ctg10-65237645-65237800	BosSINE2	-	9	78.2383	83.1948	72.138	11.0568	0.000575562	0.0224556
ctg10-65237665-65237823	BosSINE3	-	9	75.4651	80.5104	69.2556	11.2549	0.000707298	0.0243453
ctg10-65244981-65245186	BosSINE3	+	4	79.8597	93.7367	62.7119	31.0248	0.000200254	0.0158399
ctg10-65377804-65377952	BosSINEL	-	5	90.7425	95.5831	84.7461	10.837	0.00126597	0.0309714
ctg10-65622379-65622605	BosSINE2	-	3	65.6851	71.6542	58.3385	13.3157	0.00178879	0.0363949
ctg10-65700093-65700283	BosSINE1	-	3	70.0022	64.7881	76.3179	-11.5299	0.00212864	0.0396247
ctg10-66049383-66049592	BosSINE2	-	5	79.4117	88.0754	69.7	18.3754	0.001255	0.0309714
ctg10-66827439-66827712	BosSINEL	+	6	82.99	87.7464	77.4559	10.2905	0.000707298	0.0243453
ctg10-67368115-67368344	BosSINE2	-	3	86.8254	95.2115	76.791	18.4205	0.000412587	0.0205211
ctg10-6759551-6759808	BosSINEL	-	7	61.953	55.9304	69.349	-13.4186	0.000580014	0.0224556
ctg10-68008924-68009146	BosSINE3	-	3	91.0918	96.7867	83.4184	13.3682	0.00198549	0.0394187
ctg10-68199219-68199529	BosSINEL	+	6	86.7011	92.1069	80.4844	11.6225	0.00178879	0.0363949
ctg10-68965807-68966023	BosSINE2	-	3	82.2951	88.1731	74.9649	13.2081	0.000311152	0.0180281
ctg10-68971564-68971783	BosSINE2	-	6	73.0713	82.5	61.4667	21.0333	0.000858483	0.026256
ctg10-68987074-68987344	BosSINEL	+	3	67.8668	75.9723	58.2699	17.7024	0.000296533	0.0180281
ctg10-69495306-69495579	BosSINEL	+	3	75.3894	68.4283	84.7501	-16.3219	0.0013664	0.0331412
ctg10-69779914-69780188	BosSINEL	+	13	84.6955	96.2555	70.776	25.4795	1.09926e-05	0.00901759
ctg10-7009068-7009286	BosSINEL	-	8	73.6641	67.0091	82.5025	-15.4934	0.000473624	0.0209513
ctg10-7010109-7010303	BosSINE2	+	7	68.3132	58.8439	79.975	-21.1311	0.000126017	0.013894
ctg10-70117571-70117776	BosSINE3	-	3	72.5169	79.6592	63.9731	15.6861	0.00252352	0.0430208
ctg10-70234073-70234302	BosSINE2	-	3	62.0707	72.8375	48.8192	24.0183	1.49417e-05	0.0093863
ctg10-70667979-70668100	BosSINE6	-	3	34.6167	23.1677	49.8819	-26.7142	0.00312165	0.0483505
ctg10-70861635-70861762	BosSINE2	+	5	86.7608	92.5736	79.7177	12.8559	0.000580014	0.0224556
ctg10-70889257-70889380	BosSINE6	+	4	83.0365	87.9689	77.1115	10.8573	0.00124915	0.0309714
ctg10-71311037-71311303	BosSINEL	+	3	90.9068	86.1103	96.3071	-10.1968	0.00283441	0.0468558
ctg10-71363994-71364200	BosSINE3	+	3	75.6239	86.5748	61.8385	24.7363	0.00106289	0.0292247
ctg10-71497116-71497378	BosSINEL	-	6	81.1198	90.935	68.9592	21.9758	0.000250236	0.0167908
ctg10-71518503-71518697	BosSINE3	-	4	59.672	67.2848	50.1216	17.1632	0.000250236	0.0167908
ctg10-71524350-71524625	BosSINEL	-	9	87.2776	91.941	81.2218	10.7192	0.00124915	0.0309714
ctg10-71758840-71759043	BosSINE3	-	5	76.1302	90.1981	58.5222	31.6759	4.62101e-05	0.0113782
ctg10-71789695-71789899	BosSINE3	+	3	73.0293	84.27	59.1457	25.1243	0.00178879	0.0363949
ctg10-7189569-7189843	BosSINEL	+	7	85.0366	90.7027	78.2941	12.4087	0.00100411	0.0285926
ctg10-7200296-7200565	BosSINEL	+	7	81.2766	89.0206	71.5301	17.4905	0.000580014	0.0224556
ctg10-7222506-7222697	BosSINE3	+	4	82.5014	89.7857	74.1166	15.6691	5.74679e-06	0.00881238
ctg10-72479768-72479895	BosSINE2	-	5	86.8086	95.6637	75.91	19.7538	0.00103778	0.0285926
ctg10-72479778-72479915	BosSINEL	-	4	89.2513	97.0297	79.6779	17.3518	0.000722647	0.0248307
ctg10-72926536-72926734	BosSINE3	+	3	88.9171	95.737	80.8756	14.8614	0.000160861	0.0149689
ctg10-73443996-73444266	BosSINEL	-	6	78.5713	88.8655	65.8117	23.0538	0.00038477	0.0194558
ctg10-73463482-73463689	BosSINE1	-	7	81.5728	88.2388	73.5403	14.6985	0.00124915	0.0309714
ctg10-7407857-7408131	BosSINEL	+	4	85.4386	90.6862	79.589	11.0972	0.000311152	0.0180281
ctg10-74307296-74307494	BosSINE2	-	5	80.6976	88.0844	71.6062	16.4782	0.000858483	0.026256
ctg10-7465599-7465755	BosSINE3	+	4	31.8922	20.539	45.9111	-25.372	0.000858483	0.026256
ctg10-75298229-75298396	BosSINEL	+	5	71.4248	80.8528	60.2087	20.644	0.00252352	0.0430208
ctg10-75422259-75422469	BosSINE2	-	3	74.2053	83.7137	63.0628	20.6509	0.000311152	0.0180281
ctg10-75685462-75685659	BosSINE2	+	4	90.6427	97.7234	81.9279	15.7956	0.00054544	0.0224556
ctg10-7573840-7574044	BosSINE3	+	4	69.6111	80.1523	56.5325	23.6199	0.00178879	0.0363949
ctg10-75742080-75742361	BosSINEL	-	5	89.4167	94.52	83.1331	11.3869	0.00229391	0.0418835
ctg10-75742247-75742375	BosSINE3	-	4	88.4002	94.7362	80.7452	13.9911	0.00117239	0.0309714
ctg10-75827832-75828030	BosSINE1	-	3	81.7009	93.8619	67.0641	26.7978	0.000348606	0.0194558
ctg10-76021620-76021835	BosSINE2	-	7	72.6364	80.0818	62.8624	17.2194	0.00307205	0.0476466
ctg10-76041576-76041789	BosSINE3	+	3	76.6832	85.7573	65.6065	20.1508	0.0013664	0.0331412
ctg10-76113148-76113287	BosSINE6	-	4	19.6883	9.08549	31.3885	-22.303	0.00126071	0.0309714
ctg10-7627990-7628189	BosSINE2	-	6	84.6532	95.7854	70.9519	24.8335	5.9973e-05	0.011619
ctg10-76280308-76280578	BosSINEL	+	6	82.9805	92.2549	71.022	21.2329	0.00124915	0.0309714
ctg10-76283276-76283470	BosSINE2	+	6	84.6666	95.7815	71.5662	24.2153	0.000124242	0.013894
ctg10-7672405-7672610	BosSINE1	-	5	49.0074	38.6115	61.268	-22.6565	0.000858483	0.026256
ctg10-76742775-76742982	BosSINE3	+	3	81.8507	90.7944	71.6876	19.1068	0.000720454	0.0247778
ctg10-76783778-76783963	BosSINE3	+	3	80.2601	88.8926	69.7346	19.158	0.00298141	0.0468558
ctg10-76853516-76853715	BosSINE1	+	4	82.1157	94.383	67.6789	26.7041	0.000572858	0.0224556
ctg10-76854843-76855032	BosSINE3	+	8	72.7552	87.3102	54.6826	32.6276	0.00178879	0.0363949
ctg10-76877099-76877301	BosSINE2	+	5	88.8025	96.9213	78.91	18.0113	0.00115763	0.0309714
ctg10-76890998-76891110	BosSINE2	-	4	83.5398	93.9361	70.3337	23.6025	0.00158966	0.0351234
ctg10-77106325-77106593	BosSINEL	+	9	39.7891	45.2038	32.9005	12.3034	0.000707298	0.0243453
ctg10-77311755-77312021	BosSINEL	+	8	87.4633	93.4089	80.1569	13.252	0.000580014	0.0224556
ctg10-77375130-77375208	BosSINE3	-	3	34.6232	20.289	51.7256	-31.4367	0.000707298	0.0243453
ctg10-77431183-77431386	BosSINE2	+	3	76.6669	92.3399	58.8216	33.5184	0.00235029	0.0427152
ctg10-78038700-78038758	BosSINEL	+	3	88.1612	94.4611	80.5231	13.938	0.00178879	0.0363949
ctg10-78206946-78207223	BosSINEL	+	6	87.8349	92.8915	82.1634	10.7281	0.00038477	0.0194558
ctg10-78644508-78644718	BosSINE3	+	4	91.8267	96.5383	86.0279	10.5104	0.000486604	0.0212516
ctg10-79298134-79298348	BosSINE3	+	3	81.5322	89.4646	71.7692	17.6954	0.000488955	0.0212516
ctg10-7936330-7936349	BosSINE1	+	4	90.431	95.9984	83.5788	12.4196	0.000207143	0.0163132
ctg10-79391354-79391581	BosSINE2	+	3	17.2322	3.73229	33.8474	-30.1151	0.00115763	0.0309714
ctg10-79443519-79443737	BosSINE2	-	3	86.5207	91.4104	80.5026	10.9079	0.000311152	0.0180281
ctg10-79493384-79493521	BosSINE3	+	5	91.2736	97.41	83.6854	13.7246	0.000296533	0.0180281
ctg10-79496431-79496563	BosSINE6	+	3	82.6949	95.5365	67.1308	28.4057	0.000103831	0.0136341
ctg10-79666011-79666214	BosSINE3	-	3	89.3442	95.7115	81.1658	14.5456	0.000473624	0.0209513
ctg10-79669287-79669540	BosSINEL	+	9	61.9038	67.2806	55.2863	11.9942	0.000473624	0.0209513
ctg10-79732912-79733183	BosSINEL	-	6	84.8078	94.1917	73.5942	20.5975	9.90217e-05	0.0132745
ctg10-79791666-79791792	BosSINEL	-	7	76.4054	89.5239	60.5813	28.9426	0.00124915	0.0309714
ctg10-79794901-79795063	BosSINE3	-	3	86.8846	94.456	78.7308	15.7252	0.000124242	0.013894
ctg10-79935475-79935719	BosSINE1	+	5	71.3002	81.9637	59.0294	22.9343	0.00313508	0.048485
ctg10-80158938-80159097	BosSINEL	-	4	87.3149	93.2711	79.9296	13.3414	0.0024763	0.0430208
ctg10-80485855-80486128	BosSINEL	-	6	80.5971	87.6667	71.4806	16.186	0.00149782	0.0334817
ctg10-80580719-80580943	BosSINE2	-	7	69.8498	81.9589	54.9462	27.0128	0.000707298	0.0243453
ctg10-80710364-80710636	BosSINEL	+	8	83.3471	91.2352	73.4657	17.7695	0.000250236	0.0167908
ctg10-80777236-80777367	BosSINEL	-	4	90.6006	96.1314	84.1788	11.9527	0.00147148	0.0334817
ctg10-80814398-80814475	BosSINE6	+	3	64.131	72.55	53.7692	18.7808	0.00198042	0.0394187
ctg10-81064853-81065070	BosSINE1	-	5	82.4499	89.101	74.0835	15.0175	0.00124915	0.0309714
ctg10-81108796-81108997	BosSINE2	+	4	81.0591	86.1047	74.849	11.2556	0.00252352	0.0430208
ctg10-81195603-81195870	BosSINEL	-	5	79.6059	89.0913	68.1541	20.9373	0.000311152	0.0180281
ctg10-81218231-81218444	BosSINE2	-	3	88.6794	95.4366	80.7628	14.6738	0.00055859	0.0224556
ctg10-81384937-81385145	BosSINE3	-	3	90.8194	95.3085	85.2141	10.0944	0.000915159	0.027861
ctg10-81464756-81464980	BosSINE2	+	3	80.035	95.2457	63.7231	31.5226	8.66152e-05	0.0132745
ctg10-8166706-8166888	BosSINE3	+	3	87.9754	93.8152	80.6635	13.1517	0.00178879	0.0363949
ctg10-82028582-82028781	BosSINE3	+	4	76.0478	83.5975	66.8205	16.7771	0.00149782	0.0334817
ctg10-8225551-8225813	BosSINEL	+	9	89.6325	97.1602	80.5897	16.5705	0.000349194	0.0194558
ctg10-8227625-8227740	BosSINE2	-	3	82.5874	92.5923	70.7962	21.7961	0.000350963	0.0194558
ctg10-82303117-82303315	BosSINE3	+	7	73.4501	89.0478	54.7969	34.2509	0.00038477	0.0194558
ctg10-82372954-82373085	BosSINEL	-	6	73.4588	68.1347	80.0687	-11.934	0.00124915	0.0309714
ctg10-82491498-82491618	BosSINEL	+	4	83.7445	92.032	74.4471	17.5848	0.00103778	0.0285926
ctg10-82737396-82737618	BosSINE2	-	3	25.6269	12.8346	40.9333	-28.0987	0.000473624	0.0209513
ctg10-82770972-82771246	BosSINEL	-	7	69.3659	77.242	59.5579	17.6841	0.00298141	0.0468558
ctg10-82837317-82837481	BosSINEL	-	3	70.2897	80.2442	58.5756	21.6685	0.00212864	0.0396247
ctg10-82900658-82900907	BosSINEL	+	8	16.8531	7.21146	29.1184	-21.9069	0.00038477	0.0194558
ctg10-82910573-82910691	BosSINE6	-	3	93.3544	97.8135	87.5105	10.3031	0.000319544	0.0184522
ctg10-83054071-83054266	BosSINE3	-	5	48.7217	33.6997	67.6934	-33.9938	0.00124915	0.0309714
ctg10-83176617-83176891	BosSINEL	+	10	87.0262	92.2205	81.2636	10.9569	0.000311152	0.0180281
ctg10-8324252-8324454	BosSINE2	-	6	76.3666	70.6623	83.3848	-12.7225	0.000126017	0.013894
ctg10-83390405-83390685	BosSINEL	+	7	34.2952	23.084	48.6468	-25.5627	0.00149782	0.0334817
ctg10-83623150-83623346	BosSINE2	+	3	77.7246	82.4824	72.1615	10.3209	3.52765e-05	0.0107934
ctg10-83652379-83652572	BosSINEL	+	6	81.0291	88.063	72.185	15.878	0.000200254	0.0158399
ctg10-84624321-84624595	BosSINEL	-	7	84.2504	96.8054	68.5222	28.2832	0.000250236	0.0167908
ctg10-84692901-84693176	BosSINEL	+	10	81.7092	90.0895	71.9236	18.1659	0.00298141	0.0468558
ctg10-84899427-84899637	BosSINE3	-	6	84.5165	94.8885	71.5391	23.3494	4.62101e-05	0.0113782
ctg10-84909962-84910040	BosSINE2	+	4	22.3901	4.20625	44.7702	-40.5639	0.000145618	0.0148443
ctg10-84946297-84946502	BosSINE3	-	6	78.676	89.8731	64.0165	25.8566	0.00103778	0.0285926
ctg10-84951079-84951210	BosSINEL	+	7	87.2948	94.9327	78.2038	16.7288	0.000488955	0.0212516
ctg10-85170267-85170382	BosSINE6	+	3	77.746	85.851	67.7705	18.0805	0.00212864	0.0396247
ctg10-85171004-85171227	BosSINE2	-	4	32.1135	25.5773	40.3546	-14.7773	0.00298141	0.0468558
ctg10-85232988-85233240	BosSINEL	-	6	68.5858	77.6867	56.6053	21.0814	4.62101e-05	0.0113782
ctg10-85254880-85255082	BosSINE3	+	6	81.2513	90.8598	69.0466	21.8132	0.00178879	0.0363949
ctg10-85255692-85255786	BosSINE2	+	5	81.8265	95.6238	64.5828	31.0409	0.000207143	0.0163132
ctg10-85334827-85335026	BosSINE3	-	12	35.0825	42.1956	26.3279	15.8677	0.00038477	0.0194558
ctg10-85383004-85383197	BosSINE2	+	7	83.7727	91.0963	74.9269	16.1694	0.000473624	0.0209513
ctg10-85660871-85661067	BosSINE2	+	6	87.9509	93.5406	81.0712	12.4695	7.73607e-05	0.0124599
ctg10-85672125-85672239	BosSINE3	+	5	72.4382	78.6734	65.1768	13.4966	0.00212864	0.0396247
ctg10-85754025-85754345	BosSINE1	-	3	79.0929	88.9276	68.1167	20.8109	0.000707298	0.0243453
ctg10-85766768-85767042	BosSINEL	-	3	76.341	71.8754	82.6307	-10.7553	0.00181226	0.0368407
ctg10-85890443-85890559	BosSINE6	-	3	85.9764	90.776	80.0692	10.7068	0.00103778	0.0285926
ctg10-86165578-86165765	BosSINE2	-	4	55.6737	60.8766	49.2702	11.6064	0.00149782	0.0334817
ctg10-86166884-86166995	BosSINE6	+	3	82.0764	88.826	73.7692	15.0568	1.09926e-05	0.00901759
ctg10-86167014-86167209	BosSINE2	+	5	75.3297	88.145	59.5569	28.5881	0.000488955	0.0212516
ctg10-86312628-86312811	BosSINE3	+	4	79.7802	91.3198	65.3267	25.9931	9.90217e-05	0.0132745
ctg10-86438612-86438824	BosSINE3	+	5	81.8601	92.2018	69.3238	22.8779	0.00103778	0.0285926
ctg10-86457043-86457173	BosSINE6	-	3	23.1487	5.94576	43.9885	-38.0427	0.00190004	0.0382164
ctg10-86484435-86484702	BosSINEL	-	6	30.7437	18.7312	46.4108	-27.6796	0.000311152	0.0180281
ctg10-86552603-86552816	BosSINE3	-	3	78.3545	91.9596	61.5323	30.4273	0.000858483	0.026256
ctg10-86622461-86622686	BosSINE2	-	3	89.4864	97.483	79.5138	17.9693	0.0022032	0.0406653
ctg10-86685386-86685515	BosSINE6	+	6	59.1791	69.0121	46.706	22.3062	0.00212864	0.0396247
ctg10-86708606-86708880	BosSINEL	-	11	36.8619	29.0541	46.3334	-17.2793	0.00124915	0.0309714
ctg10-86720133-86720261	BosSINE6	-	3	86.0684	96.0802	73.7462	22.3341	4.09121e-05	0.0113782
ctg10-87264590-87264837	BosSINEL	+	9	35.7298	30.5111	42.044	-11.5329	3.52765e-05	0.0107934
ctg10-87268823-87268977	BosSINE2	+	4	77.9294	83.3658	71.2933	12.0726	0.000473624	0.0209513
ctg10-87634129-87634241	BosSINE6	+	3	84.7085	89.726	78.49	11.2361	0.00015926	0.0148443
ctg10-87724115-87724226	BosSINE2	+	3	74.577	79.4594	68.5679	10.8914	0.00307205	0.0476466
ctg10-87736066-87736185	BosSINE6	-	4	68.1725	84.543	50.9423	33.6007	0.001255	0.0309714
ctg10-87974444-87974635	BosSINE3	+	7	85.9334	91.3153	79.4393	11.876	0.000200254	0.0158399
ctg10-88123732-88123929	BosSINE1	-	6	76.6282	85.6482	65.1773	20.4709	0.00103778	0.0285926
ctg10-88147838-88148041	BosSINE3	-	5	79.1979	91.2606	64.3515	26.9091	7.73607e-05	0.0124599
ctg10-88173559-88173729	BosSINE3	-	4	83.6972	90.3723	75.3365	15.0358	0.00021649	0.0167665
ctg10-88185609-88185814	BosSINE2	-	5	77.7955	84.3775	69.6946	14.6829	0.000311152	0.0180281
ctg10-88222774-88222948	BosSINE3	-	6	68.9874	82.3449	53.3615	28.9833	0.000126017	0.013894
ctg10-88231287-88231562	BosSINEL	-	6	53.31	44.4471	64.2045	-19.7574	1.32618e-06	0.00754262
ctg10-88289677-88289952	BosSINEL	-	8	62.6996	54.6735	72.5244	-17.8509	7.73607e-05	0.0124599
ctg10-88319644-88319829	BosSINE3	+	7	86.7815	94.1889	77.5115	16.6774	0.00124915	0.0309714
ctg10-88320826-88321091	BosSINEL	+	12	87.1194	92.265	80.8907	11.3743	7.73607e-05	0.0124599
ctg10-88363375-88363589	BosSINE3	-	3	72.0673	79.824	62.0596	17.7643	7.73607e-05	0.0124599
ctg10-88385276-88385473	BosSINE1	+	4	80.8222	85.4565	75.4244	10.0321	0.000200254	0.0158399
ctg10-88671268-88671381	BosSINE3	-	3	68.2927	79.3628	55.7222	23.6406	0.000981854	0.0285926
ctg10-8872735-8872870	BosSINE6	+	4	81.5591	94.7383	65.3385	29.3998	1.09926e-05	0.00901759
ctg10-88909574-88909791	BosSINE2	+	3	76.679	85.0941	67.0252	18.0689	9.90217e-05	0.0132745
ctg10-89124365-89124579	BosSINE2	-	6	81.4162	89.9632	70.8233	19.1399	0.000624034	0.0239174
ctg10-89391760-89391916	BosSINE2	+	4	85.2579	90.5703	78.5296	12.0407	7.73607e-05	0.0124599
ctg10-89461284-89461374	BosSINE2	-	6	89.7774	96.2672	82.2891	13.9781	0.000388881	0.0196532
ctg10-89572747-89572972	BosSINE2	-	3	76.7574	81.3281	70.8733	10.4548	0.00212864	0.0396247
ctg10-89712471-89712651	BosSINE4	+	3	79.5741	88.8125	68.2038	20.6087	4.62101e-05	0.0113782
ctg10-89740001-89740219	BosSINE2	+	4	79.6265	84.4041	73.7273	10.6769	0.00252352	0.0430208
ctg10-89761439-89761571	BosSINE3	-	3	85.196	90.9198	78.1513	12.7685	0.00015926	0.0148443
ctg10-89864388-89864704	BosSINE1	+	3	62.2044	68.1617	55.009	13.1527	0.00252352	0.0430208
ctg10-89964898-89965114	BosSINE3	-	3	74.4764	82.1094	65.0821	17.0273	8.66152e-05	0.0132745
ctg10-90317038-90317236	BosSINE2	-	6	82.5628	87.89	76.0769	11.8131	1.49417e-05	0.0093863
ctg10-90327710-90327839	BosSINE6	+	4	81.2	89.1242	71.4471	17.6771	1.09926e-05	0.00901759
ctg10-90444287-90444597	BosSINE1	+	3	81.5731	91.4667	69.4771	21.9895	0.000486604	0.0212516
ctg10-90987905-90988038	BosSINE3	+	5	72.411	82.9707	60.5524	22.4183	0.000311152	0.0180281
ctg10-91274870-91275079	BosSINE3	+	4	55.3883	65.3681	43.9433	21.4248	7.73607e-05	0.0124599
ctg10-91508240-91508442	BosSINE3	+	4	78.9309	87.0866	69.0358	18.0507	0.00038477	0.0194558
ctg10-91683903-91684062	BosSINE2	+	4	74.9316	83.5228	64.5148	19.008	0.00252352	0.0430208
ctg10-92256243-92256510	BosSINEL	-	10	74.2028	79.7526	67.4125	12.3401	0.000311152	0.0180281
ctg10-92262184-92262404	BosSINE2	-	3	87.2228	92.6399	81.3372	11.3028	1.49417e-05	0.0093863
ctg10-92314092-92314318	BosSINE2	+	6	82.4875	88.05	75.7999	12.2501	0.000580014	0.0224556
ctg10-92518630-92518838	BosSINE3	-	3	82.685	92.1018	71.7968	20.3051	0.00117239	0.0309714
ctg10-92578487-92578564	BosSINE3	-	3	82.4644	88.5594	74.9628	13.5966	9.90217e-05	0.0132745
ctg10-92607927-92608143	BosSINE2	+	8	75.3129	88.0641	59.1694	28.8946	0.00124915	0.0309714
ctg10-92742391-92742666	BosSINEL	-	9	62.05	67.8991	55.2812	12.6179	0.000707298	0.0243453
ctg10-92895065-92895246	BosSINEL	-	7	74.0952	80.2601	66.5477	13.7124	9.90217e-05	0.0132745
ctg10-92895828-92895909	BosSINEL	+	3	80.5632	85.1458	74.9231	10.2228	0.00124915	0.0309714
ctg10-93002738-93002951	BosSINE3	+	3	59.8517	70.7896	45.8972	24.8924	0.000858483	0.026256
ctg10-93075837-93076036	BosSINE3	+	5	74.5829	85.2566	60.962	24.2946	1.97454e-06	0.00754262
ctg10-93983033-93983235	BosSINE3	+	3	68.4294	74.6922	61.3451	13.3471	0.00038477	0.0194558
ctg10-94137346-94137479	BosSINEL	-	6	77.5918	86.0568	66.6536	19.4031	0.000250236	0.0167908
ctg10-94320701-94320953	BosSINEL	+	7	77.1955	83.1029	69.7972	13.3057	0.00212864	0.0396247
ctg10-94587702-94587884	BosSINE2	+	5	59.9479	71.1336	46.7623	24.3713	4.62101e-05	0.0113782
ctg10-94643617-94643847	BosSINE2	-	4	59.6295	69.9847	48.459	21.5257	0.00149782	0.0334817
ctg10-94775664-94775873	BosSINE3	+	3	66.2249	74.6684	55.6665	19.0019	8.01604e-06	0.00881238
ctg10-95289618-95289893	BosSINEL	-	5	68.5381	74.9714	60.7574	14.2139	0.00307205	0.0476466
ctg10-95668044-95668250	BosSINE3	+	3	57.5483	64.8125	48.6077	16.2048	0.00124915	0.0309714
ctg10-95815408-95815597	BosSINE3	-	6	74.6875	84.335	62.8911	21.4439	1.49417e-05	0.0093863
ctg10-95824827-95825037	BosSINE3	+	3	76.3716	85.2837	65.6141	19.6696	0.00108524	0.0293547
ctg10-9640814-9641088	BosSINEL	-	9	89.3648	95.8563	80.944	14.9122	0.00147215	0.0334817
ctg10-96529944-96530069	BosSINE3	+	5	72.5072	80.8591	61.9254	18.9337	0.00298141	0.0468558
ctg10-97014181-97014389	BosSINE2	-	4	62.2334	72.2687	49.0435	23.2253	0.00103778	0.0285926
ctg10-97389971-97390169	BosSINE1	+	3	64.536	70.0979	57.8584	12.2395	0.00298141	0.0468558
ctg10-97952852-97953124	BosSINEL	-	4	70.0022	77.4143	61.5011	15.9132	0.00103778	0.0285926
ctg10-98652501-98652764	BosSINE1	-	4	69.5392	74.3125	63.6644	10.6481	0.00149782	0.0334817
ctg10-98687815-98688021	BosSINE3	+	3	77.539	85.8664	68.0996	17.7668	0.00319232	0.0492917
ctg10-99169040-99169241	BosSINE1	-	3	66.9593	72.6857	60.1167	12.569	0.00178879	0.0363949
ctg10-99937682-99937914	BosSINE2	+	10	86.121	93.7518	76.7025	17.0493	2.67594e-05	0.0103792
ctg11-100140700-100140959	BosSINEL	+	4	76.4608	89.7625	60.0894	29.6731	5.74679e-06	0.00881238
ctg11-100170095-100170220	BosSINE6	-	3	82.6343	88.1434	75.8059	12.3376	0.000580014	0.0224556
ctg11-100193012-100193136	BosSINE6	-	3	30.9667	22.1031	41.8756	-19.7725	0.00124915	0.0309714
ctg11-100227012-100227223	BosSINE3	-	5	67.3564	78.7827	53.899	24.8837	2.67594e-05	0.0103792
ctg11-100260639-100260862	BosSINE2	+	4	55.2306	47.7445	64.4442	-16.6997	0.000103831	0.0136341
ctg11-100312668-100312927	BosSINEL	+	12	19.2928	9.4744	30.9593	-21.4849	0.00103778	0.0285926
ctg11-100327952-100328065	BosSINE6	-	3	28.9382	14.446	46.8665	-32.4204	2.00696e-05	0.0097305
ctg11-100457396-100457670	BosSINEL	-	9	84.6328	95.6628	71.1996	24.4633	9.90217e-05	0.0132745
ctg11-100591223-100591434	BosSINE3	-	5	64.3952	77.6475	48.0846	29.5629	1.49417e-05	0.0093863
ctg11-100613910-100614184	BosSINEL	-	5	84.5753	89.6587	79.1869	10.4718	0.001255	0.0309714
ctg11-100661102-100661253	BosSINE2	+	7	81.2019	86.0473	75.0147	11.0326	0.000250236	0.0167908
ctg11-100700804-100700895	BosSINE6	-	3	83.9241	88.5852	78.4359	10.1493	0.00298141	0.0468558
ctg11-10071475-10071591	BosSINE2	+	3	80.8483	94.5719	63.9577	30.6142	0.000350372	0.0194558
ctg11-100753685-100753869	BosSINE1	+	6	88.3145	92.9145	82.8684	10.0461	0.00126597	0.0309714
ctg11-100858141-100858391	BosSINEL	+	6	80.2881	89.2944	69.7956	19.4989	0.000580014	0.0224556
ctg11-100960860-100960976	BosSINE6	-	3	88.3341	93.8917	81.3229	12.5688	0.000858483	0.026256
ctg11-100973142-100973268	BosSINE6	-	4	78.3858	83.8617	71.6462	12.2156	0.00038477	0.0194558
ctg11-101013345-101013470	BosSINE6	+	5	90.9563	96.7387	84.4652	12.2736	0.00112529	0.0304011
ctg11-101024696-101024961	BosSINEL	+	7	72.3755	78.9365	64.1383	14.7982	0.00178879	0.0363949
ctg11-101159840-101159971	BosSINE6	+	4	59.5078	70.3033	45.8264	24.4768	0.00103778	0.0285926
ctg11-101168245-101168473	BosSINE2	-	6	62.8722	70.0141	53.7022	16.3118	0.000126017	0.013894
ctg11-101283190-101283401	BosSINE3	+	7	55.3495	48.9161	63.2676	-14.3515	0.00149782	0.0334817
ctg11-101380281-101380481	BosSINE3	-	9	85.5115	92.8804	76.3544	16.5259	0.00298141	0.0468558
ctg11-101425960-101426234	BosSINEL	-	7	39.4783	30.6732	50.3154	-19.6422	0.00149782	0.0334817
ctg11-101427492-101427708	BosSINE2	-	7	10.9827	2.98548	20.6747	-17.6892	0.0021373	0.0396247
ctg11-101446715-101446918	BosSINE3	-	4	83.0823	92.8453	71.0663	21.779	0.000473624	0.0209513
ctg11-101449763-101449887	BosSINE6	-	6	21.3658	9.42344	36.5807	-27.1572	0.000200254	0.0158399
ctg11-101461465-101461577	BosSINE6	+	3	38.9655	28.8281	51.4423	-22.6142	2.67594e-05	0.0103792
ctg11-10150765-10150971	BosSINE3	-	4	61.0254	67.1688	53.4644	13.7043	0.000707298	0.0243453
ctg11-101513871-101514081	BosSINE3	+	3	88.9109	94.9323	81.5	13.4323	0.000250236	0.0167908
ctg11-101516537-101516654	BosSINE6	-	4	90.7101	96.1539	83.8233	12.3306	0.00136453	0.0331412
ctg11-101518115-101518318	BosSINE2	+	4	83.6567	91.8251	73.3391	18.486	0.000707298	0.0243453
ctg11-101519829-101519987	BosSINE2	-	3	78.2126	90.6469	62.909	27.7379	4.62101e-05	0.0113782
ctg11-101546548-101546749	BosSINE3	-	5	88.1394	92.7738	82.2068	10.567	0.00038477	0.0194558
ctg11-101767052-101767245	BosSINE3	-	6	86.4862	92.7315	78.8656	13.8659	0.00178879	0.0363949
ctg11-101985294-101985466	BosSINEL	+	7	76.5047	84.8393	66.2467	18.5926	9.90217e-05	0.0132745
ctg11-10239439-10239650	BosSINE2	+	7	80.2313	89.8464	68.3973	21.4492	3.52765e-05	0.0107934
ctg11-102423969-102424236	BosSINEL	-	7	88.8729	93.8594	82.7357	11.1237	0.00103778	0.0285926
ctg11-102480459-102480691	BosSINE2	+	7	42.335	50.5131	32.4524	18.0607	0.000311152	0.0180281
ctg11-102866292-102866369	BosSINE3	-	6	88.0989	93.6012	81.5558	12.0454	0.00147414	0.0334817
ctg11-102892074-102892332	BosSINEL	+	10	50.5695	46.1609	56.2244	-10.0635	0.00252352	0.0430208
ctg11-102982293-102982402	BosSINE6	+	5	78.0762	86.348	68.0806	18.2674	9.90217e-05	0.0132745
ctg11-102985565-102985738	BosSINE3	-	7	86.8845	93.3529	78.8692	14.4837	0.00178879	0.0363949
ctg11-103051485-103051562	BosSINE3	-	6	80.7817	89.1363	70.1968	18.9395	0.000473624	0.0209513
ctg11-103120720-103120922	BosSINE3	+	8	75.5272	89.3242	58.3294	30.9948	3.52765e-05	0.0107934
ctg11-103220834-103221031	BosSINE2	-	4	79.8414	88.9453	68.6365	20.3088	0.000250236	0.0167908
ctg11-103269857-103270066	BosSINE3	-	9	74.76	87.4194	59.1791	28.2404	0.00149782	0.0334817
ctg11-103270688-103270788	BosSINE4	+	7	79.1662	87.6752	70.0681	17.6071	0.000176916	0.0158399
ctg11-103272648-103272861	BosSINE3	+	7	85.7019	92.4787	77.3719	15.1069	0.00149782	0.0334817
ctg11-103483767-103483982	BosSINE2	+	9	82.2052	90.3028	72.2389	18.0639	0.000473624	0.0209513
ctg11-103493060-103493280	BosSINE2	+	6	71.0074	65.3563	78.2938	-12.9376	0.00178879	0.0363949
ctg11-103532790-103533007	BosSINE2	+	3	81.8841	94.7233	67.1051	27.6182	0.000695561	0.0243453
ctg11-103533001-103533165	BosSINE3	-	4	81.047	92.7047	66.699	26.0056	0.00184607	0.0372002
ctg11-103579690-103579884	BosSINE3	+	6	85.9107	93.2426	76.7975	16.4451	0.00149782	0.0334817
ctg11-103761415-103761603	BosSINE2	-	4	74.1784	87.5953	57.6654	29.9299	0.000580014	0.0224556
ctg11-103761614-103761804	BosSINE1	-	3	88.947	94.829	81.7154	13.1136	0.000375875	0.0194558
ctg11-103972506-103972716	BosSINE2	+	8	91.7996	96.5348	85.9716	10.5631	1.97454e-06	0.00754262
ctg11-104049292-104049490	BosSINE1	-	6	49.5482	56.7418	41.0521	15.6897	0.000176916	0.0158399
ctg11-104105741-104105930	BosSINE3	-	6	77.8578	87.2901	66.2487	21.0414	9.90217e-05	0.0132745
ctg11-104117154-104117353	BosSINE2	-	8	89.4976	94.0039	83.9514	10.0525	0.00038477	0.0194558
ctg11-104167587-104167776	BosSINE2	+	10	47.347	54.4316	38.7279	15.7037	0.00178879	0.0363949
ctg11-104243525-104243741	BosSINE2	+	6	86.8483	95.1515	77.0308	18.1207	2.67594e-05	0.0103792
ctg11-104384181-104384300	BosSINE6	-	4	20.8163	27.4534	12.7557	14.6977	0.00228725	0.0418835
ctg11-104399857-104399936	BosSINE2	+	4	88.2323	94.1891	80.901	13.2881	0.00252352	0.0430208
ctg11-104417593-104417795	BosSINE3	+	7	89.5581	94.2134	83.8047	10.4087	0.000473624	0.0209513
ctg11-104438489-104438664	BosSINE4	-	4	82.9075	95.0383	67.6784	27.3598	0.00108524	0.0293547
ctg11-104811029-104811150	BosSINE4	+	4	86.0582	94.7408	75.5367	19.2041	0.00260089	0.0442301
ctg11-104839278-104839441	BosSINE1	-	4	36.7694	46.1953	25.1683	21.027	0.000858483	0.026256
ctg11-104842407-104842635	BosSINE2	+	6	47.5928	54.1359	40.0122	14.1237	0.00252352	0.0430208
ctg11-104885726-104885901	BosSINE1	-	11	33.244	40.5714	24.4787	16.0927	8.01604e-06	0.00881238
ctg11-104889654-104889881	BosSINE2	+	5	84.8066	91.6137	76.4285	15.1853	0.000311152	0.0180281
ctg11-104967122-104967257	BosSINE5	+	4	81.9435	88.4422	74.1981	14.2442	0.00212864	0.0396247
ctg11-104999262-104999339	BosSINE6	+	6	84.7221	92.4967	75.1949	17.3019	0.000580014	0.0224556
ctg11-105187134-105187317	BosSINE4	-	4	79.0052	84.9883	71.6413	13.3469	0.000250236	0.0167908
ctg11-105433537-105433697	BosSINE4	+	5	77.8728	92.2982	60.0187	32.2794	1.09926e-05	0.00901759
ctg11-105501287-105501505	BosSINE3	-	6	78.1575	90.5437	64.359	26.1847	0.00108524	0.0293547
ctg11-105689603-105689824	BosSINE2	-	6	73.2084	83.0279	61.3917	21.6362	0.00103778	0.0285926
ctg11-105749882-105750072	BosSINE2	-	5	71.7307	83.4624	57.3321	26.1304	9.90217e-05	0.0132745
ctg11-105787149-105787275	BosSINE6	-	8	63.5982	75.5097	48.8634	26.6463	0.000707298	0.0243453
ctg11-105889846-105889898	BosSINE1	+	4	80.1835	88.7308	69.867	18.8638	5.9973e-05	0.011619
ctg11-105954134-105954356	BosSINE3	-	5	77.8866	90.0169	62.9569	27.06	0.000707298	0.0243453
ctg11-106099213-106099434	BosSINE2	+	5	78.9076	92.2812	62.4477	29.8336	0.000311152	0.0180281
ctg11-106114838-106115109	BosSINEL	+	8	82.5397	89.7414	73.676	16.0654	0.00038477	0.0194558
ctg11-106200334-106200440	BosSINE6	+	3	68.4981	85.5881	48.2175	37.3706	0.000272385	0.0180281
ctg11-106483020-106483236	BosSINE2	+	14	87.1684	95.3806	77.2219	18.1587	0.000473624	0.0209513
ctg11-106580837-106581012	BosSINE1	+	7	81.6999	90.9344	70.5018	20.4325	0.00038477	0.0194558
ctg11-106778024-106778183	BosSINE4	-	4	70.9756	77.7549	62.6894	15.0654	0.00103778	0.0285926
ctg11-106829836-106829966	BosSINE6	-	3	85.0537	94.2687	73.4865	20.7822	0.000481924	0.021234
ctg11-1081268-1081542	BosSINEL	+	5	78.7171	89.4854	66.9477	22.5377	0.00038477	0.0194558
ctg11-10863092-10863366	BosSINEL	+	7	36.5564	27.017	48.1945	-21.1775	0.00212864	0.0396247
ctg11-1087514-1087730	BosSINE2	+	5	82.499	92.7744	69.8523	22.9221	0.000250236	0.0167908
ctg11-11076080-11076292	BosSINE3	-	4	79.4349	92.0846	63.7141	28.3705	0.00126421	0.0309714
ctg11-1116091-1116298	BosSINE3	-	4	49.4155	41.7578	58.9898	-17.232	0.00158966	0.0351234
ctg11-11247577-11247851	BosSINEL	+	3	92.2027	97.3187	86.2764	11.0423	0.00011762	0.013894
ctg11-1130312-1130532	BosSINE2	-	5	34.9983	22.5769	50.2862	-27.7093	0.00266198	0.0446645
ctg11-11353548-11353809	BosSINEL	+	8	83.612	88.7387	77.8347	10.9041	0.00103778	0.0285926
ctg11-1135874-1136065	BosSINE3	-	3	80.1762	90.2173	67.7882	22.429	0.00149782	0.0334817
ctg11-11359026-11359152	BosSINE6	-	4	75.8151	70.5701	82.1712	-11.6011	0.00149782	0.0334817
ctg11-11365615-11365834	BosSINE2	+	6	89.5901	96.3259	81.2217	15.1042	0.000200254	0.0158399
ctg11-11417049-11417324	BosSINEL	+	6	89.4039	96.0108	81.9424	14.0684	0.00182455	0.0370529
ctg11-11711548-11711775	BosSINE2	+	4	74.8621	87.5709	59.3451	28.2258	1.09926e-05	0.00901759
ctg11-1191503-1191720	BosSINE3	+	8	64.8192	56.7375	74.7676	-18.0301	0.000580014	0.0224556
ctg11-12211606-12211873	BosSINEL	-	6	87.0685	92.0771	80.5022	11.5749	0.00103778	0.0285926
ctg11-12253693-12253895	BosSINE3	-	3	84.9715	95.8506	71.2218	24.6288	0.000604902	0.0233713
ctg11-1273908-1274127	BosSINE2	-	6	82.9395	90.3129	73.9637	16.3493	0.00252352	0.0430208
ctg11-1279829-1280036	BosSINE3	+	4	83.7743	92.9665	72.3489	20.6177	0.000707298	0.0243453
ctg11-13485571-13485768	BosSINE2	+	4	81.197	90.3395	70.0019	20.3376	0.000858483	0.026256
ctg11-13543071-13543284	BosSINE2	+	3	82.0845	90.2698	72.0103	18.2595	0.000250236	0.0167908
ctg11-13544192-13544467	BosSINEL	-	11	85.4736	90.5493	79.0292	11.5201	0.000488955	0.0212516
ctg11-13580671-13580897	BosSINE2	-	6	70.5074	81.9658	56.2022	25.7636	1.09926e-05	0.00901759
ctg11-13600000-13600221	BosSINE2	+	7	79.512	85.5437	71.9673	13.5764	5.74679e-06	0.00881238
ctg11-13718256-13718501	BosSINEL	-	4	80.1242	91.085	68.5053	22.5797	0.00218571	0.0404017
ctg11-13800875-13801066	BosSINE3	+	9	56.8245	64.6108	47.2415	17.3693	0.000126017	0.013894
ctg11-14004516-14004709	BosSINE3	-	3	87.2899	96.7889	75.6904	21.0985	0.000780227	0.026256
ctg11-14162488-14162681	BosSINE2	+	3	87.0295	94.1115	78.1132	15.9982	0.00229391	0.0418835
ctg11-14175143-14175353	BosSINE2	+	5	85.419	91.8156	77.5462	14.2695	0.00178879	0.0363949
ctg11-14202741-14202949	BosSINE3	+	5	89.2872	95.5362	81.5962	13.9401	0.000450363	0.0209513
ctg11-14259366-14259638	BosSINEL	+	8	67.8927	76.6484	57.1163	19.5321	0.00298141	0.0468558
ctg11-14262795-14263028	BosSINEL	+	8	73.2855	83.3841	61.207	22.1772	0.000311152	0.0180281
ctg11-14279936-14280154	BosSINE2	+	3	79.7594	93.0646	63.0059	30.0587	5.74679e-06	0.00881238
ctg11-14386022-14386154	BosSINEL	-	4	92.0352	87.5531	97.988	-10.4349	0.00141787	0.0334817
ctg11-14635468-14635737	BosSINEL	+	9	86.5184	91.7574	80.2038	11.5536	0.00212864	0.0396247
ctg11-1478004-1478204	BosSINE3	-	3	79.2195	86.2203	70.8615	15.3588	0.000858483	0.026256
ctg11-14865495-14865719	BosSINE2	-	5	52.8866	44.4763	63.2377	-18.7614	0.00124915	0.0309714
ctg11-14871895-14872125	BosSINEL	+	4	84.6551	92.0839	76.1724	15.9115	0.00126421	0.0309714
ctg11-14892073-14892206	BosSINE3	-	4	90.6901	96.2272	83.9768	12.2505	0.000782573	0.026256
ctg11-14987464-14987662	BosSINE2	-	3	88.2407	97.1332	77.4803	19.6528	0.000170804	0.0157815
ctg11-15227377-15227649	BosSINEL	+	8	78.0401	72.8738	84.2691	-11.3953	0.000250236	0.0167908
ctg11-15588629-15588933	BosSINE1	+	4	78.5686	73.4573	84.65	-11.1927	0.000858483	0.026256
ctg11-16008970-16009279	BosSINE1	+	4	80.6709	92.8566	66.6385	26.2182	2.00696e-05	0.0097305
ctg11-16388000-16388129	BosSINE3	-	4	82.9637	92.8855	70.8494	22.0361	2.00696e-05	0.0097305
ctg11-1650791-1650909	BosSINE6	+	3	83.909	92.3457	72.5529	19.7928	0.000250089	0.0167908
ctg11-16712947-16713098	BosSINEL	+	3	78.0718	83.1056	72.1092	10.9964	0.00252352	0.0430208
ctg11-1772909-1773117	BosSINE3	-	3	66.5753	76.2875	54.6218	21.6657	5.9973e-05	0.011619
ctg11-17753134-17753409	BosSINEL	-	5	73.8797	80.2891	65.1354	15.1537	0.00149782	0.0334817
ctg11-1781066-1781262	BosSINE3	+	3	71.9463	84.8692	56.9439	27.9253	0.00171346	0.0363949
ctg11-1796204-1796382	BosSINE3	-	4	86.0482	92.4442	77.9514	14.4927	0.000580014	0.0224556
ctg11-18117857-18118131	BosSINEL	+	3	39.6151	45.9186	31.4712	14.4474	0.00149926	0.0334817
ctg11-1857247-1857499	BosSINEL	+	7	39.0675	29.9593	50.2434	-20.284	8.01604e-06	0.00881238
ctg11-186282-186464	BosSINE3	+	3	88.4293	94.7985	80.9256	13.8728	0.00182455	0.0370529
ctg11-18746503-18746778	BosSINEL	-	5	76.3277	84.5625	65.4919	19.0706	0.000200254	0.0158399
ctg11-18747140-18747405	BosSINEL	-	7	84.5443	90.5826	77.1126	13.47	0.000311152	0.0180281
ctg11-18815030-18815233	BosSINE3	-	5	76.2417	82.6669	68.3338	14.333	0.00149782	0.0334817
ctg11-18853796-18853981	BosSINE1	+	3	76.8861	87.725	62.7931	24.9319	0.00015926	0.0148443
ctg11-1887099-1887144	BosSINE2	+	7	83.8386	96.2066	68.6627	27.5439	5.66849e-05	0.011619
ctg11-18894706-18894915	BosSINE3	-	4	76.3299	87.354	63.1769	24.1771	0.000580014	0.0224556
ctg11-19200447-19200556	BosSINE3	+	3	80.8092	92.4448	66.4885	25.9563	0.00146817	0.0334817
ctg11-19536549-19536822	BosSINEL	-	9	86.1233	95.877	73.8641	22.0129	0.000580014	0.0224556
ctg11-19618650-19618834	BosSINE1	-	3	82.4652	89.2933	74.3436	14.9497	0.00015926	0.0148443
ctg11-19744162-19744363	BosSINE3	+	3	89.8397	94.5646	84.0244	10.5402	2.67594e-05	0.0103792
ctg11-19748279-19748427	BosSINE2	+	5	84.0454	94.4321	71.2117	23.2204	0.000350963	0.0194558
ctg11-19875817-19876031	BosSINE2	+	3	72.7943	66.9417	80.3605	-13.4188	0.000580014	0.0224556
ctg11-20137525-20137748	BosSINE2	+	7	89.581	95.4882	82.3092	13.179	0.00252352	0.0430208
ctg11-2014692-2014887	BosSINE3	+	4	88.065	94.2142	80.7269	13.4872	0.000858483	0.026256
ctg11-20149335-20149579	BosSINEL	-	5	88.4436	93.2465	82.6093	10.6372	0.00198806	0.0394187
ctg11-20362063-20362212	BosSINE6	+	4	67.9543	61.7422	75.6	-13.8578	0.00038477	0.0194558
ctg11-20513406-20513635	BosSINE2	+	3	84.6351	89.6604	78.45	11.2104	0.00298141	0.0468558
ctg11-20819149-20819352	BosSINE3	-	3	82.0569	90.5812	71.5654	19.0159	7.73607e-05	0.0124599
ctg11-20848599-20848795	BosSINE3	+	4	83.2255	94.2328	70.8933	23.3395	2.67594e-05	0.0103792
ctg11-20920140-20920411	BosSINEL	-	9	89.2033	94.0722	83.2107	10.8615	5.9973e-05	0.011619
ctg11-21018152-21018427	BosSINEL	+	11	83.4487	89.3604	76.8323	12.5281	0.00178879	0.0363949
ctg11-21019529-21019724	BosSINE3	+	3	86.5329	95.2891	75.9564	19.3327	0.000924575	0.0278673
ctg11-21067897-21068120	BosSINE2	-	5	80.984	87.5475	72.9808	14.5668	0.00038477	0.0194558
ctg11-210988-211259	BosSINEL	+	6	75.9451	83.4545	66.3467	17.1078	0.00212864	0.0396247
ctg11-21240181-21240450	BosSINEL	-	7	87.5613	95.1617	78.0653	17.0964	7.79048e-05	0.0124996
ctg11-2130036-2130235	BosSINE3	-	6	69.3903	80.3759	56.3762	23.9996	0.00124915	0.0309714
ctg11-21765423-21765648	BosSINE2	-	8	83.9867	94.488	71.0735	23.4145	1.49417e-05	0.0093863
ctg11-21849979-21850091	BosSINE6	-	3	78.2901	90.3765	63.7295	26.647	0.00266198	0.0446645
ctg11-21850600-21850802	BosSINE2	-	6	79.893	93.0657	63.9344	29.1312	0.000250089	0.0167908
ctg11-22575093-22575295	BosSINE3	-	5	84.1381	89.945	77.0196	12.9254	0.00038477	0.0194558
ctg11-2281539-2281757	BosSINE2	+	7	42.4741	48.7946	34.6951	14.0996	0.000311152	0.0180281
ctg11-2299449-2299677	BosSINE2	-	3	81.1357	93.2602	65.9134	27.3467	0.00182217	0.0370244
ctg11-2334878-2334972	BosSINE6	+	3	79.4609	92.8469	62.9859	29.861	0.00015926	0.0148443
ctg11-2336563-2336601	BosSINE2	-	3	59.5518	66.3604	50.6248	15.7356	0.000311152	0.0180281
ctg11-2368202-2368379	BosSINE2	+	3	64.4717	73.3631	53.6987	19.6643	0.00298141	0.0468558
ctg11-24165576-24165850	BosSINEL	-	7	82.094	89.5777	73.6216	15.956	0.000200254	0.0158399
ctg11-2417182-2417409	BosSINE2	-	5	84.3748	88.8794	78.789	10.0904	0.000473624	0.0209513
ctg11-2432383-2432518	BosSINE6	+	6	71.0967	81.7887	57.7721	24.0166	8.01604e-06	0.00881238
ctg11-24461174-24461382	BosSINE2	-	6	87.9293	93.9578	80.5096	13.4482	0.000200254	0.0158399
ctg11-24542098-24542178	BosSINE3	+	3	91.0207	95.9865	84.909	11.0775	0.00265874	0.0446645
ctg11-2471173-2471400	BosSINE2	+	10	49.7438	57.2872	40.5099	16.7773	5.74679e-06	0.00881238
ctg11-2487499-2487704	BosSINE3	+	3	83.0741	96.1885	66.9333	29.2552	0.000446359	0.0209513
ctg11-25208160-25208383	BosSINE2	+	3	88.1715	95.9606	78.8744	17.0863	0.0014366	0.0334817
ctg11-25488978-25489245	BosSINEL	-	8	30.0273	18.0246	45.2779	-27.2533	0.00178879	0.0363949
ctg11-2554291-2554405	BosSINE6	+	5	91.5621	97.3512	84.4369	12.9143	0.000145618	0.0148443
ctg11-25573638-25573780	BosSINE1	+	3	92.9678	98.0135	86.7577	11.2558	0.000235035	0.0167908
ctg11-25589547-25589757	BosSINE2	+	4	89.9439	96.5745	81.1603	15.4142	0.000122104	0.013894
ctg11-2560617-2560820	BosSINE3	-	4	80.9326	85.6109	74.978	10.6329	0.00015926	0.0148443
ctg11-25688408-25688612	BosSINE3	+	3	89.381	95.1958	82.2244	12.9715	0.000848341	0.026256
ctg11-25776339-25776532	BosSINE1	-	4	86.8918	94.7289	77.2462	17.4828	0.000296533	0.0180281
ctg11-25782804-25783036	BosSINEL	+	6	91.4846	97.4367	83.7802	13.6565	0.000349194	0.0194558
ctg11-2587101-2587192	BosSINE3	+	3	83.4592	96.9271	66.8833	30.0437	2.29682e-05	0.0103792
ctg11-25888055-25888247	BosSINE3	+	4	93.2581	98.099	87.2288	10.8701	0.000502521	0.0218086
ctg11-26358272-26358367	BosSINE2	+	4	88.9832	95.0836	81.475	13.6086	0.00298141	0.0468558
ctg11-26726510-26726721	BosSINE3	+	4	76.8423	72.2981	82.5795	-10.2814	0.000858483	0.026256
ctg11-2680378-2680454	BosSINE3	-	4	60.4004	70.1734	48.55	21.6234	0.000126017	0.013894
ctg11-26859165-26859390	BosSINE2	-	3	85.4085	92.7229	76.3201	16.4028	0.000580014	0.0224556
ctg11-2731166-2731364	BosSINE3	+	3	89.9948	96.675	81.7731	14.9019	0.0012329	0.0309714
ctg11-2766642-2766915	BosSINEL	+	8	71.2355	78.6725	62.1673	16.5052	0.000858483	0.026256
ctg11-27749941-27750205	BosSINEL	+	7	87.588	93.1086	81.4016	11.707	0.00178879	0.0363949
ctg11-28049576-28049707	BosSINEL	-	7	69.6365	79.4049	56.6583	22.7466	0.000450363	0.0209513
ctg11-2805949-2806165	BosSINE2	+	4	92.6228	97.242	87.1365	10.1054	8.66152e-05	0.0132745
ctg11-2844086-2844159	BosSINE5	+	3	91.2868	98.4717	82.4173	16.0544	0.000143856	0.0148443
ctg11-2856358-2856572	BosSINE2	+	4	90.1879	95.2227	83.9913	11.2313	0.000311152	0.0180281
ctg11-2882462-2882691	BosSINE2	-	5	74.182	89.2832	56.6046	32.6786	0.00298141	0.0468558
ctg11-28850946-28851207	BosSINEL	-	7	89.392	95.1959	82.2864	12.9095	0.00038477	0.0194558
ctg11-28854729-28854827	BosSINE2	+	7	86.0453	91.9504	78.9735	12.9769	0.000126017	0.013894
ctg11-290082-290284	BosSINE3	+	5	74.1272	88.1012	56.9285	31.1728	0.00212864	0.0396247
ctg11-29059044-29059136	BosSINE2	-	4	93.2007	98.0208	87.549	10.4717	0.000310678	0.0180281
ctg11-29139686-29139959	BosSINEL	+	8	89.1505	94.5653	82.4307	12.1346	0.000580014	0.0224556
ctg11-29176967-29177222	BosSINEL	-	6	86.1443	91.3838	80.1643	11.2195	0.00178879	0.0363949
ctg11-29256275-29256550	BosSINEL	+	12	84.9875	91.9339	76.4372	15.4967	0.00015926	0.0148443
ctg11-29259635-29259902	BosSINEL	-	9	89.8708	94.8899	83.578	11.3119	0.000473624	0.0209513
ctg11-29313299-29313382	BosSINE6	+	3	87.3667	95.9062	76.8564	19.0498	0.000656807	0.0243453
ctg11-29315295-29315523	BosSINE3	-	4	81.001	91.3126	68.826	22.4866	0.000126017	0.013894
ctg11-29395829-29396024	BosSINE3	+	3	89.2083	94.9984	82.2739	12.7244	0.00306841	0.0476466
ctg11-29476245-29476447	BosSINE1	+	3	66.6894	72.1764	60.0858	12.0906	0.00105466	0.0290366
ctg11-29477177-29477333	BosSINE1	+	5	88.5405	95.4282	80.49	14.9382	0.000789641	0.026256
ctg11-29592186-29592385	BosSINE2	+	4	53.2655	65.0752	38.8942	26.1809	0.000126017	0.013894
ctg11-29728469-29728597	BosSINE3	+	3	84.0627	91.5175	74.8429	16.6746	0.000647957	0.0243453
ctg11-29733911-29734133	BosSINE2	-	7	90.8952	96.2274	84.2378	11.9895	0.00230253	0.0418835
ctg11-29738796-29738996	BosSINE2	-	3	90.4586	96.0396	83.5897	12.4498	0.00147215	0.0334817
ctg11-30055136-30055406	BosSINEL	+	8	23.9594	17.4394	31.7587	-14.3193	0.00015926	0.0148443
ctg11-30109576-30109790	BosSINE3	-	4	89.8886	94.9826	83.5466	11.436	0.000580014	0.0224556
ctg11-30196232-30196341	BosSINE6	+	3	80.6644	90.8	68.1897	22.6103	0.000311152	0.0180281
ctg11-30702514-30702789	BosSINEL	-	8	83.744	91.1101	75.1295	15.9806	0.000250236	0.0167908
ctg11-30704132-30704267	BosSINEL	+	4	29.722	12.8266	50.5163	-37.6898	0.000311152	0.0180281
ctg11-3133785-3133845	BosSINE5	+	3	91.9178	97.5146	85.0295	12.4851	0.00103361	0.0285926
ctg11-32089629-32089709	BosSINE3	+	3	71.7997	77.9528	65.2423	12.7105	0.00149782	0.0334817
ctg11-334312-334514	BosSINE3	-	5	80.6334	86.9375	72.8746	14.0629	0.00038477	0.0194558
ctg11-3385308-3385534	BosSINE2	-	3	83.8359	95.2524	70.3769	24.8755	0.00117239	0.0309714
ctg11-33995661-33995936	BosSINEL	-	3	66.6242	58.0043	76.9741	-18.9698	0.000178462	0.0158399
ctg11-3401406-3401533	BosSINE6	+	5	28.3514	12.7156	47.5954	-34.8798	0.000126017	0.013894
ctg11-35229044-35229312	BosSINEL	-	8	86.5203	91.3955	80.6077	10.7878	0.00149782	0.0334817
ctg11-35530744-35530902	BosSINEL	-	4	45.7564	37.5145	56.083	-18.5685	0.00178879	0.0363949
ctg11-357538-357743	BosSINE3	+	3	89.6115	94.7531	83.2833	11.4698	0.000349194	0.0194558
ctg11-3595556-3595778	BosSINE2	+	6	86.209	91.8833	79.5712	12.3122	0.00124915	0.0309714
ctg11-36524764-36524891	BosSINE3	-	3	85.5247	93.4229	75.8038	17.6191	0.000414629	0.0205211
ctg11-36662589-36662790	BosSINE1	-	4	77.6435	82.7498	71.4202	11.3296	7.73607e-05	0.0124599
ctg11-36684408-36684595	BosSINE3	+	7	77.3008	84.2615	69.0401	15.2214	9.90217e-05	0.0132745
ctg11-36844870-36845020	BosSINEL	+	3	85.2078	89.9921	79.1238	10.8683	0.000707298	0.0243453
ctg11-37186290-37186565	BosSINEL	-	6	82.6079	77.8126	88.5103	-10.6977	0.00103778	0.0285926
ctg11-37694036-37694162	BosSINEL	+	5	78.8522	89.252	65.7828	23.4692	0.00015926	0.0148443
ctg11-37704941-37705211	BosSINEL	-	6	75.5858	89.3456	59.0161	30.3295	9.90217e-05	0.0132745
ctg11-37872647-37872830	BosSINE4	+	4	84.9625	91.791	76.7337	15.0573	0.000250236	0.0167908
ctg11-38197255-38197474	BosSINE2	+	3	84.0782	91.9781	74.3551	17.623	0.000858483	0.026256
ctg11-38612088-38612199	BosSINE2	+	3	87.3575	94.3156	78.7936	15.522	0.000858436	0.026256
ctg11-38626130-38626336	BosSINE2	+	3	89.0482	95.6169	80.9132	14.7037	0.000130715	0.0143784
ctg11-38639156-38639404	BosSINEL	+	4	88.3073	94.0152	82.1733	11.8419	0.00311371	0.0482591
ctg11-39073148-39073403	BosSINEL	+	4	79.0941	84.0767	73.3915	10.6852	0.00252352	0.0430208
ctg11-39087697-39087909	BosSINE2	+	3	62.453	70.3634	53.3184	17.045	0.00298141	0.0468558
ctg11-39110085-39110309	BosSINE2	+	3	66.5155	74.351	56.8718	17.4792	0.00252352	0.0430208
ctg11-39140364-39140682	BosSINE1	-	5	74.8058	81.2474	67.0264	14.221	0.000580014	0.0224556
ctg11-39147395-39147604	BosSINE3	+	3	80.6429	86.6162	73.1514	13.4648	0.000858483	0.026256
ctg11-39167519-39167649	BosSINE2	+	3	84.1926	89.1497	78.6603	10.4894	0.000707298	0.0243453
ctg11-39199737-39199954	BosSINE2	+	3	41.8637	47.7433	34.6496	13.0938	0.00124915	0.0309714
ctg11-3922508-3922727	BosSINE3	+	4	80.7788	95.8336	61.4848	34.3488	0.00112573	0.0304066
ctg11-4003290-4003512	BosSINE2	+	14	75.8248	88.081	61.3962	26.6848	0.000707298	0.0243453
ctg11-4013056-4013282	BosSINE2	+	3	78.5623	86.4024	68.911	17.4915	0.000858483	0.026256
ctg11-4054211-4054353	BosSINEL	-	6	48.7779	42.2703	57.1052	-14.8349	0.000707298	0.0243453
ctg11-40886749-40886867	BosSINE2	-	3	75.7629	82.9856	67.0256	15.96	0.00212864	0.0396247
ctg11-4103373-4103513	BosSINE5	+	7	26.8372	10.6447	46.3097	-35.665	0.00103778	0.0285926
ctg11-4112085-4112152	BosSINE3	-	3	77.3196	91.95	57.8125	34.1375	5.92339e-05	0.011619
ctg11-41397169-41397364	BosSINE3	+	3	81.2237	88.3845	72.6442	15.7402	0.000858483	0.026256
ctg11-4144117-4144300	BosSINE1	+	3	79.4452	92.3056	64.6064	27.6991	0.000126017	0.013894
ctg11-42393750-42393972	BosSINE2	+	3	88.5963	93.2635	82.796	10.4675	0.00230253	0.0418835
ctg11-42693297-42693421	BosSINE3	+	3	79.9897	89.9562	67.3216	22.6347	3.52765e-05	0.0107934
ctg11-42722284-42722516	BosSINEL	+	9	91.1281	95.595	85.4208	10.1743	0.00252352	0.0430208
ctg11-4302358-4302411	BosSINE1	+	3	67.5728	82.1943	50.7077	31.4866	0.000858483	0.026256
ctg11-4302372-4302421	BosSINE3	+	4	63.7903	78.2307	47.1327	31.098	0.00124915	0.0309714
ctg11-43487068-43487248	BosSINE1	-	4	83.4557	89.1621	76.5342	12.6278	0.000176916	0.0158399
ctg11-43566305-43566566	BosSINEL	+	7	88.2482	93.7417	82.0744	11.6673	0.000676282	0.0243453
ctg11-44064425-44064697	BosSINEL	+	4	85.4902	91.6914	77.5075	14.1839	0.000250236	0.0167908
ctg11-44102249-44102435	BosSINE3	+	3	79.251	86.3226	70.6904	15.6322	0.00212864	0.0396247
ctg11-44377724-44377938	BosSINE3	-	6	80.6336	91.2671	67.2545	24.0125	0.000473624	0.0209513
ctg11-44643608-44643762	BosSINE5	-	3	91.7207	97.05	85.1615	11.8885	0.00265747	0.0446645
ctg11-44733817-44734051	BosSINE2	-	6	86.2244	95.1062	75.6019	19.5043	2.67594e-05	0.0103792
ctg11-44898637-44898856	BosSINE2	-	6	91.4847	97.0463	84.8095	12.2368	0.000474196	0.020952
ctg11-45530766-45531029	BosSINEL	+	3	79.2764	85.1162	72.0462	13.0701	0.000707298	0.0243453
ctg11-4558969-4559092	BosSINE6	+	3	54.0633	45.5688	65.1266	-19.5579	0.00212864	0.0396247
ctg11-45689822-45690017	BosSINE2	+	3	80.8483	86.9083	73.3897	13.5186	0.00103778	0.0285926
ctg11-45692225-45692420	BosSINE1	+	3	53.2325	58.3448	46.9446	11.4002	0.000580014	0.0224556
ctg11-45717162-45717370	BosSINE3	-	3	80.6026	89.152	70.3908	18.7612	9.90217e-05	0.0132745
ctg11-45723298-45723486	BosSINE2	+	6	85.3853	96.2203	72.753	23.4673	8.3357e-05	0.0132745
ctg11-457475-457699	BosSINE2	+	4	70.1296	84.5868	52.3729	32.2139	0.000488955	0.0212516
ctg11-45783816-45784018	BosSINE2	-	4	71.978	76.5306	66.3604	10.1702	0.00124915	0.0309714
ctg11-45835719-45835922	BosSINE3	+	3	63.5556	71.2229	54.1702	17.0527	0.00015926	0.0148443
ctg11-45903553-45903670	BosSINE1	+	4	83.7228	93.8359	71.276	22.56	0.000200254	0.0158399
ctg11-45903570-45903679	BosSINE2	+	4	83.7228	93.8359	71.276	22.56	0.000200254	0.0158399
ctg11-459217-459420	BosSINE2	-	9	87.8909	93.9274	80.9114	13.0161	0.000676282	0.0243453
ctg11-45951769-45951978	BosSINE3	+	3	62.132	70.0481	53.1929	16.8552	0.00252352	0.0430208
ctg11-46007884-46008085	BosSINEL	+	6	38.7447	31.2058	47.9526	-16.7467	0.00212864	0.0396247
ctg11-46019625-46019900	BosSINEL	-	7	49.5805	43.2393	57.3852	-14.1459	2.67594e-05	0.0103792
ctg11-46112893-46112953	BosSINEL	-	3	75.8724	90.3948	57.9987	32.3961	0.00017659	0.0158399
ctg11-4613460-4613733	BosSINEL	+	6	74.3039	83.8527	62.675	21.1777	0.00178879	0.0363949
ctg11-4614810-4614925	BosSINE2	+	4	83.6272	88.9727	77.1548	11.8178	0.000858483	0.026256
ctg11-46208273-46208483	BosSINE3	-	3	67.4432	75.5781	57.067	18.5111	0.000858483	0.026256
ctg11-46337134-46337330	BosSINE3	-	5	58.4756	69.3044	44.636	24.6683	0.00252352	0.0430208
ctg11-46670127-46670319	BosSINE3	-	4	67.4525	78.5405	54.3077	24.2328	0.000473624	0.0209513
ctg11-46734674-46734798	BosSINE3	+	3	89.4908	94.723	82.403	12.3199	0.000913819	0.0278337
ctg11-46849874-46850066	BosSINE3	-	3	90.6123	95.5146	84.9051	10.6095	0.00063692	0.0243453
ctg11-47087050-47087253	BosSINE3	-	3	81.3153	92.1427	67.5842	24.5585	0.000250236	0.0167908
ctg11-47311770-47311971	BosSINE3	+	4	86.8316	94.0653	77.9113	16.154	0.000924575	0.0278673
ctg11-47352533-47352664	BosSINE6	+	3	85.4574	95.0209	74.6727	20.3482	0.000709114	0.0244034
ctg11-47478988-47479207	BosSINE3	-	4	85.8227	93.8698	77.3647	16.505	0.0012329	0.0309714
ctg11-4755589-4755811	BosSINE2	+	3	87.5611	92.7177	81.2295	11.4882	0.0024763	0.0430208
ctg11-47779349-47779542	BosSINEL	-	3	76.7442	85.3372	67.0782	18.259	0.00108524	0.0293547
ctg11-47783590-47783786	BosSINE2	+	3	82.1111	90.636	71.2258	19.4103	0.00298141	0.0468558
ctg11-47829525-47829719	BosSINE3	-	3	83.5851	90.421	75.4962	14.9248	0.00178879	0.0363949
ctg11-47865755-47865913	BosSINEL	+	3	25.521	9.21313	46.1455	-36.9323	0.000103783	0.0136341
ctg11-47923331-47923480	BosSINE5	-	3	88.5068	95.0381	79.7374	15.3007	5.64328e-05	0.011619
ctg11-47973950-47974133	BosSINE2	+	3	79.39	85.7192	71.5444	14.1748	0.000793191	0.026256
ctg11-4803194-4803288	BosSINE3	+	3	84.5369	95.7237	71.3808	24.343	0.0017067	0.0363949
ctg11-4807126-4807372	BosSINEL	-	4	79.6863	89.204	68.1962	21.0079	1.32618e-06	0.00754262
ctg11-48117045-48117238	BosSINE2	+	7	82.1968	93.4671	69.0397	24.4274	0.00103778	0.0285926
ctg11-48134992-48135194	BosSINE3	-	5	80.2985	92.3007	66.4322	25.8685	0.00178879	0.0363949
ctg11-48186800-48187006	BosSINE3	+	4	87.8207	94.7203	79.2268	15.4935	0.00103778	0.0285926
ctg11-48674594-48674719	BosSINE2	+	3	62.231	69.3438	53.4769	15.8668	0.000126017	0.013894
ctg11-48949598-48949808	BosSINE3	+	7	79.7912	94.0047	62.4279	31.5767	0.000200254	0.0158399
ctg11-49062945-49063215	BosSINEL	-	6	47.2966	41.8031	54.0577	-12.2546	3.52765e-05	0.0107934
ctg11-49139492-49139679	BosSINE2	-	5	60.2684	53.9013	68.0769	-14.1755	0.00252352	0.0430208
ctg11-4932876-4933017	BosSINE1	-	3	86.9092	91.5945	81.1897	10.4048	0.00178879	0.0363949
ctg11-4932889-4933035	BosSINE2	-	3	86.9092	91.5945	81.1897	10.4048	0.00178879	0.0363949
ctg11-49419829-49420022	BosSINE1	+	4	81.7332	77.0617	87.4827	-10.421	0.000858483	0.026256
ctg11-49448096-49448269	BosSINE2	-	3	78.7487	92.1756	62.6103	29.5654	0.000676282	0.0243453
ctg11-49448270-49448542	BosSINEL	+	9	67.6632	80.4966	52.7684	27.7282	0.000473624	0.0209513
ctg11-49451363-49451558	BosSINE2	+	6	83.8629	94.6799	70.6801	23.9997	0.00149782	0.0334817
ctg11-49563708-49563922	BosSINE2	-	7	84.1542	92.5183	73.8599	18.6584	7.73607e-05	0.0124599
ctg11-49576310-49576517	BosSINE2	+	3	85.3363	95.5315	71.981	23.5505	0.00224544	0.0413965
ctg11-49594178-49594377	BosSINE2	+	3	12.113	3.17653	22.8628	-19.6863	0.000100006	0.013397
ctg11-49596486-49596827	BosSINE1	+	6	60.0894	52.6635	69.5047	-16.8412	0.00178879	0.0363949
ctg11-49626248-49626311	BosSINE5	+	3	91.5925	98.6188	82.9449	15.6739	0.000179768	0.0158399
ctg11-49628020-49628295	BosSINEL	+	7	91.3432	97.3348	84.1451	13.1897	0.000103831	0.0136341
ctg11-49678662-49678867	BosSINE2	+	5	88.4665	95.5256	79.6052	15.9204	0.00265874	0.0446645
ctg11-49710252-49710465	BosSINE2	+	5	84.4538	93.7256	72.7155	21.0101	0.000412587	0.0205211
ctg11-49801881-49802082	BosSINE2	-	3	81.2856	89.576	71.0821	18.494	0.000793191	0.026256
ctg11-49959369-49959568	BosSINE3	+	4	83.7092	92.2605	73.3745	18.886	0.00224827	0.0414285
ctg11-50005370-50005559	BosSINE3	-	5	82.86	94.2673	68.99	25.2772	0.00108061	0.0293547
ctg11-50071046-50071259	BosSINE2	+	4	80.5022	88.5203	70.6337	17.8867	0.000473624	0.0209513
ctg11-50074795-50075039	BosSINEL	+	5	34.1834	27.5688	42.3246	-14.7559	1.09926e-05	0.00901759
ctg11-50075487-50075697	BosSINE3	+	5	18.8634	4.50188	36.5392	-32.0374	8.66152e-05	0.0132745
ctg11-50112722-50112932	BosSINE1	+	3	78.5784	87.9265	67.3515	20.575	0.00151984	0.0338594
ctg11-50162996-50163215	BosSINE3	-	3	78.514	89.0311	65.7154	23.3157	0.000311152	0.0180281
ctg11-50180516-50180723	BosSINE2	+	3	78.4534	89.5646	63.9156	25.649	0.000730359	0.0250149
ctg11-5025259-5025457	BosSINE1	-	3	88.2048	94.9417	80.8027	14.139	0.00212918	0.0396247
ctg11-50357352-50357442	BosSINE3	+	4	85.5563	93.8317	74.271	19.5607	0.000296533	0.0180281
ctg11-50448185-50448391	BosSINE3	+	3	69.5309	78.0983	59.2205	18.8778	0.00298141	0.0468558
ctg11-50736823-50737098	BosSINEL	+	9	87.934	92.4244	82.273	10.1514	0.00252352	0.0430208
ctg11-50901953-50902177	BosSINE2	+	5	79.2333	87.6552	68.5541	19.1011	0.0013664	0.0331412
ctg11-509093-509177	BosSINEL	+	4	71.223	83.2405	56.574	26.6665	2.67594e-05	0.0103792
ctg11-51407857-51408015	BosSINE2	+	4	79.1752	87.5304	69.4385	18.0919	0.000473624	0.0209513
ctg11-51714951-51715226	BosSINEL	-	6	66.618	72.0827	60.5243	11.5583	0.000580014	0.0224556
ctg11-52319705-52319914	BosSINE3	-	4	81.9404	88.1186	74.7032	13.4154	3.12934e-05	0.0107934
ctg11-52423306-52423581	BosSINEL	+	4	65.2768	71.2513	58.1623	13.089	4.62101e-05	0.0113782
ctg11-53173015-53173210	BosSINE3	-	3	64.1743	73.0445	53.5479	19.4966	0.00298141	0.0468558
ctg11-53543317-53543468	BosSINE4	+	3	69.6425	74.5917	63.5513	11.0404	0.00298141	0.0468558
ctg11-54017153-54017417	BosSINEL	+	4	77.3739	82.1091	71.783	10.3261	0.000311152	0.0180281
ctg11-5521877-5521969	BosSINE2	-	5	78.8883	91.5619	63.29	28.2719	1.49417e-05	0.0093863
ctg11-5543807-5544015	BosSINE3	-	5	73.0255	79.0219	65.5156	13.5063	7.73607e-05	0.0124599
ctg11-55573989-55574191	BosSINE2	+	3	74.8624	85.3366	62.2603	23.0764	5.9973e-05	0.011619
ctg11-55574911-55575132	BosSINE2	+	3	60.2124	65.9562	53.0203	12.936	0.00103778	0.0285926
ctg11-5558018-5558228	BosSINE2	-	5	74.7331	80.8811	67.6963	13.1849	8.01604e-06	0.00881238
ctg11-55707424-55707635	BosSINE2	-	3	69.0169	81.6615	54.1462	27.5153	0.00178879	0.0363949
ctg11-5615254-5615326	BosSINE3	+	3	86.8373	92.159	81.4942	10.6647	0.000431065	0.0209513
ctg11-56424000-56424225	BosSINE2	-	3	66.4387	73.975	58.1632	15.8118	0.000412587	0.0205211
ctg11-57743148-57743469	BosSINE1	-	3	15.7545	5.47277	27.0321	-21.5593	0.000286448	0.0180281
ctg11-5787222-5787421	BosSINE3	+	4	72.8016	85.5628	58.0346	27.5282	1.09926e-05	0.00901759
ctg11-59225373-59225593	BosSINE3	-	5	80.8317	90.6283	68.3593	22.269	9.90217e-05	0.0132745
ctg11-60158838-60159052	BosSINE3	+	4	51.482	45.6508	58.9163	-13.2655	5.9973e-05	0.011619
ctg11-60175035-60175223	BosSINE3	-	3	83.8517	93.8635	71.5295	22.3341	7.21215e-05	0.0124599
ctg11-60574721-60574978	BosSINEL	-	4	30.3323	19.1401	43.949	-24.809	0.00178879	0.0363949
ctg11-6063979-6064200	BosSINE2	+	6	79.0656	84.9772	71.7572	13.2201	0.000200254	0.0158399
ctg11-60804710-60804922	BosSINE2	+	5	18.4641	6.10313	33.6777	-27.5746	2.67594e-05	0.0103792
ctg11-60894504-60894719	BosSINE2	+	4	78.5366	86.3264	69.2388	17.0876	2.67594e-05	0.0103792
ctg11-6093672-6093814	BosSINEL	-	3	84.9713	94.2919	73.4673	20.8246	0.00169322	0.0363949
ctg11-60938754-60938888	BosSINE5	-	4	36.9371	28.182	47.7125	-19.5305	0.000311152	0.0180281
ctg11-6095140-6095326	BosSINE3	+	4	82.1068	94.1023	67.601	26.5013	0.000350963	0.0194558
ctg11-60958700-60958974	BosSINEL	-	7	27.6616	19.5675	37.9044	-18.3368	1.09926e-05	0.00901759
ctg11-60977559-60977777	BosSINE2	+	3	40.1466	29.6656	53.0462	-23.3805	1.49417e-05	0.0093863
ctg11-6109348-6109616	BosSINEL	-	8	90.9284	95.8322	85.0736	10.7587	0.00149782	0.0334817
ctg11-6116657-6116853	BosSINE3	-	3	25.9902	7.16979	49.1538	-41.9841	9.90217e-05	0.0132745
ctg11-6146677-6146892	BosSINE3	+	7	83.5511	92.6571	72.8004	19.8568	0.000139575	0.0148443
ctg11-6173165-6173261	BosSINE3	+	3	85.0885	90.5187	78.4051	12.1136	0.00298141	0.0468558
ctg11-6206979-6207172	BosSINE2	-	4	54.5728	62.3195	45.0385	17.2811	1.09926e-05	0.00901759
ctg11-6226091-6226303	BosSINE3	-	3	84.3248	90.8066	75.7556	15.051	0.000250236	0.0167908
ctg11-62547312-62547524	BosSINE3	-	3	90.2583	95.2042	84.4923	10.7119	0.00103778	0.0285926
ctg11-62587507-62587700	BosSINE2	+	7	52.423	43.993	62.5346	-18.5416	2.67594e-05	0.0103792
ctg11-62587528-62587713	BosSINE3	+	7	52.423	43.993	62.5346	-18.5416	2.67594e-05	0.0103792
ctg11-62605631-62605762	BosSINE6	+	4	84.4141	95.732	70.5174	25.2146	0.000447095	0.0209513
ctg11-62919929-62920199	BosSINEL	-	9	51.5428	41.9595	63.2717	-21.3122	0.00015926	0.0148443
ctg11-62925470-62925604	BosSINEL	+	4	73.6711	65.5281	83.6933	-18.1651	2.00696e-05	0.0097305
ctg11-62969118-62969296	BosSINE1	+	3	90.9447	97.523	82.7643	14.7587	0.00197322	0.0394187
ctg11-63020085-63020362	BosSINEL	-	13	29.6062	20.815	40.4681	-19.6531	0.000200254	0.0158399
ctg11-6307427-6307581	BosSINE3	+	4	69.1197	74.2914	62.4584	11.833	0.00124915	0.0309714
ctg11-631716-631902	BosSINE3	-	3	85.5384	93.7713	75.6308	18.1406	0.000924575	0.0278673
ctg11-63260195-63260406	BosSINE2	-	5	79.924	92.7919	64.4769	28.315	0.00126597	0.0309714
ctg11-63269862-63270075	BosSINE2	+	7	81.385	93.6188	66.328	27.2907	0.000250236	0.0167908
ctg11-63283965-63284046	BosSINEL	+	6	66.7798	74.4902	57.8288	16.6613	0.00103778	0.0285926
ctg11-63377664-63377924	BosSINEL	+	12	74.5138	82.8325	64.6216	18.2109	0.000858483	0.026256
ctg11-63489040-63489312	BosSINEL	-	10	89.9162	96.2338	81.9476	14.2862	0.000580014	0.0224556
ctg11-63689443-63689715	BosSINEL	-	5	54.1098	42.5895	68.6217	-26.0322	0.000707298	0.0243453
ctg11-63734168-63734443	BosSINEL	+	9	85.2932	94.2448	74.8346	19.4102	0.000250236	0.0167908
ctg11-63837432-63837654	BosSINE2	+	6	54.7015	41.7408	70.8604	-29.1196	0.000473624	0.0209513
ctg11-63915452-63915678	BosSINE2	-	4	72.5909	80.4601	63.2365	17.2236	0.000311152	0.0180281
ctg11-64340797-64341021	BosSINE2	+	4	88.2067	94.3326	80.7845	13.5481	0.000311152	0.0180281
ctg11-6434558-6434772	BosSINE2	+	7	84.2397	91.3804	75.4511	15.9293	0.00212864	0.0396247
ctg11-6443501-6443715	BosSINE3	+	3	16.4192	6.11236	28.9256	-22.8133	0.000847085	0.026256
ctg11-64599099-64599344	BosSINEL	-	9	82.2681	87.3832	76.0561	11.3272	0.00149782	0.0334817
ctg11-65007517-65007729	BosSINE2	+	4	79.8114	88.9758	68.5933	20.3825	0.00103778	0.0285926
ctg11-6533360-6533540	BosSINE2	+	6	65.6747	73.6959	55.7985	17.8974	0.000858483	0.026256
ctg11-65352489-65352679	BosSINE3	-	3	80.2592	85.8177	73.4179	12.3998	0.000707298	0.0243453
ctg11-65479484-65479744	BosSINEL	-	8	69.8715	77.1154	61.291	15.8243	7.73607e-05	0.0124599
ctg11-6606825-6606969	BosSINE3	+	6	54.2595	44.5745	66.1795	-21.605	0.000580014	0.0224556
ctg11-6619248-6619327	BosSINE3	-	4	42.6879	30.3547	57.8673	-27.5126	0.00124915	0.0309714
ctg11-66382745-66382880	BosSINEL	-	6	77.6641	88.6866	64.7005	23.9861	0.000707298	0.0243453
ctg11-66586702-66586976	BosSINEL	+	9	16.7674	7.09271	28.6748	-21.5821	2.00696e-05	0.0097305
ctg11-66664404-66664437	BosSINE1	+	4	88.8779	96.1765	80.0288	16.1477	2.00696e-05	0.0097305
ctg11-66703657-66703980	BosSINE1	+	4	82.7866	90.8773	72.8288	18.0485	5.9973e-05	0.011619
ctg11-66850116-66850240	BosSINE2	-	4	86.5256	91.6622	80.3151	11.3471	0.00198806	0.0394187
ctg11-66869072-66869266	BosSINE2	-	3	83.997	92.324	73.3321	18.9919	0.00298141	0.0468558
ctg11-67121830-67122051	BosSINE2	+	6	49.9422	42.3729	59.2583	-16.8854	8.84122e-07	0.00754262
ctg11-67153025-67153222	BosSINE2	+	3	51.9023	40.874	65.4756	-24.6017	3.52765e-05	0.0107934
ctg11-6733993-6734182	BosSINE3	+	6	83.8121	95.6672	69.2212	26.446	2.00696e-05	0.0097305
ctg11-67758804-67759072	BosSINEL	+	5	87.7534	93.2206	82.0077	11.2129	0.000488955	0.0212516
ctg11-67765518-67765742	BosSINE2	-	11	62.1201	71.7429	50.2766	21.4663	0.00212864	0.0396247
ctg11-67995743-67996016	BosSINEL	+	3	88.5416	93.1357	82.803	10.3327	0.00151747	0.0338594
ctg11-68012244-68012446	BosSINE3	-	4	30.3548	25.5875	36.2891	-10.7016	0.000707298	0.0243453
ctg11-68081773-68081950	BosSINEL	+	4	65.0188	70.4006	58.6538	11.7467	0.00178879	0.0363949
ctg11-68090356-68090631	BosSINEL	+	8	84.2646	92.643	74.413	18.2299	7.73607e-05	0.0124599
ctg11-68311981-68312138	BosSINE5	+	3	53.2069	59.9396	44.9205	15.0191	0.00252352	0.0430208
ctg11-68337439-68337655	BosSINE2	+	3	83.1553	88.1833	76.8483	11.335	0.00252352	0.0430208
ctg11-6857413-6857629	BosSINE2	-	4	88.0275	95.7594	78.1019	17.6575	0.00229104	0.0418835
ctg11-6865352-6865527	BosSINE4	+	3	79.9891	86.251	72.2821	13.969	0.000707298	0.0243453
ctg11-6868089-6868303	BosSINE3	+	3	82.9977	91.5531	72.4679	19.0852	0.000311152	0.0180281
ctg11-68808985-68809211	BosSINE2	+	4	87.5879	92.498	81.6779	10.8201	0.00184367	0.0372002
ctg11-69015966-69016257	BosSINE1	-	6	86.0622	92.1844	78.3997	13.7846	0.00178879	0.0363949
ctg11-69060861-69061131	BosSINEL	-	6	73.3949	80.4706	65.224	15.2466	0.000311152	0.0180281
ctg11-69184779-69184973	BosSINE2	+	3	87.2356	92.6601	80.6064	12.0537	0.00306115	0.0476466
ctg11-69505583-69505717	BosSINE2	-	8	80.4831	92.6472	66.3519	26.2953	0.000858483	0.026256
ctg11-69674345-69674555	BosSINE3	-	4	84.491	92.1883	74.8329	17.3554	0.00038477	0.0194558
ctg11-70266166-70266279	BosSINE6	-	4	84.6903	90.835	77.0409	13.7941	0.00038477	0.0194558
ctg11-71001657-71001785	BosSINE6	+	3	85.2832	90.9412	78.3208	12.6204	0.00178879	0.0363949
ctg11-71975600-71975808	BosSINE3	+	4	85.6828	94.7258	74.5529	20.1729	0.00147414	0.0334817
ctg11-71980815-71980942	BosSINEL	+	4	86.1354	94.7095	76.6125	18.097	7.73607e-05	0.0124599
ctg11-7238475-7238679	BosSINE3	-	3	71.0805	75.6979	65.3974	10.3005	2.67594e-05	0.0103792
ctg11-72458769-72458991	BosSINE2	+	5	91.728	96.3826	86.2077	10.1749	0.00147414	0.0334817
ctg11-72710046-72710246	BosSINE1	-	5	50.2206	38.5893	64.479	-25.8897	0.00103778	0.0285926
ctg11-7277617-7277819	BosSINE3	+	3	79.7042	88.2896	68.804	19.4856	0.000580014	0.0224556
ctg11-7322372-7322495	BosSINE2	-	5	68.4393	78.4484	56.4957	21.9527	0.00178879	0.0363949
ctg11-73307716-73307928	BosSINE3	-	3	88.1477	93.2552	81.8615	11.3937	0.000250236	0.0167908
ctg11-73416453-73416662	BosSINE3	+	4	83.1884	93.7539	70.1846	23.5693	5.9973e-05	0.011619
ctg11-73451444-73451551	BosSINE2	-	5	52.325	63.364	39.1876	24.1764	0.00038477	0.0194558
ctg11-73532037-73532297	BosSINEL	+	6	87.7374	93.072	81.1735	11.8985	0.000311152	0.0180281
ctg11-73729498-73729697	BosSINE3	+	4	82.5758	95.4263	65.6423	29.784	0.000401648	0.0202233
ctg11-73824553-73824702	BosSINE2	+	3	85.4066	90.5432	79.075	11.4682	0.00178879	0.0363949
ctg11-7386674-7386869	BosSINE3	+	3	74.0615	83.9554	61.3957	22.5597	0.000707298	0.0243453
ctg11-73903758-73904030	BosSINEL	-	5	46.5272	38.0194	56.9985	-18.9791	0.000126017	0.013894
ctg11-73989973-73990147	BosSINE1	+	3	76.5491	84.1146	67.0472	17.0674	0.000488955	0.0212516
ctg11-7399186-7399409	BosSINE2	-	5	78.6248	83.8269	72.3304	11.4965	0.00103778	0.0285926
ctg11-74200815-74200945	BosSINE3	+	3	89.4349	95.7612	82.5863	13.1748	0.00318747	0.0492309
ctg11-74244530-74244723	BosSINE3	-	3	74.0499	67.9304	81.3731	-13.4427	0.00212864	0.0396247
ctg11-74999753-74999934	BosSINE4	+	3	21.9865	10.5233	35.2538	-24.7305	0.000707298	0.0243453
ctg11-76522852-76522964	BosSINE2	-	3	70.4402	77.5938	61.6359	15.9579	0.00103778	0.0285926
ctg11-7734187-7734404	BosSINE2	+	5	80.7815	87.0398	73.4361	13.6037	0.00212864	0.0396247
ctg11-7751032-7751337	BosSINE1	+	3	78.2616	83.2812	71.7889	11.4924	0.00103778	0.0285926
ctg11-7769298-7769481	BosSINE2	-	4	82.9324	87.5238	77.1442	10.3797	0.00212864	0.0396247
ctg11-77873200-77873395	BosSINE2	+	4	82.3509	88.2906	75.0404	13.2502	2.00696e-05	0.0097305
ctg11-77952029-77952238	BosSINE3	-	4	82.6362	88.396	75.651	12.7451	0.000580014	0.0224556
ctg11-78289586-78289716	BosSINE2	-	3	56.0114	49.1499	64.4667	-15.3167	0.000707298	0.0243453
ctg11-78304204-78304399	BosSINE3	+	5	86.0631	93.2588	77.2069	16.0518	0.00103778	0.0285926
ctg11-78461479-78461705	BosSINEL	-	7	14.1895	7.90918	20.8185	-12.9093	0.000580014	0.0224556
ctg11-78483078-78483353	BosSINEL	-	9	37.7527	31.2899	46.0988	-14.8089	0.00015926	0.0148443
ctg11-78501368-78501630	BosSINEL	-	7	73.5633	68.0156	80.3089	-12.2933	0.000707298	0.0243453
ctg11-78505501-78505723	BosSINE2	+	6	92.5865	97.0943	87.0385	10.0558	0.000380922	0.0194558
ctg11-78519669-78519788	BosSINE6	+	4	87.5043	94.5938	78.7788	15.8149	0.00124915	0.0309714
ctg11-78565718-78565861	BosSINE3	+	3	78.1534	86.9719	67.3	19.6719	0.00212864	0.0396247
ctg11-7877031-7877171	BosSINE2	-	3	74.362	84.7221	62.6077	22.1145	0.000178462	0.0158399
ctg11-78827594-78827730	BosSINEL	+	5	55.6	45.6813	67.0446	-21.3633	2.70818e-05	0.0104613
ctg11-78886287-78886472	BosSINE2	-	3	72.6063	66.3125	80.3526	-14.0401	0.000102814	0.0136341
ctg11-78906821-78907027	BosSINEL	+	5	34.0883	25.6942	44.1188	-18.4246	0.000792006	0.026256
ctg11-79030834-79031057	BosSINE2	+	4	81.7283	87.3942	74.4259	12.9683	0.00178879	0.0363949
ctg11-79518738-79518811	BosSINE3	-	4	32.8292	23.0491	44.7195	-21.6704	0.000200254	0.0158399
ctg11-79825403-79825677	BosSINEL	+	4	81.9588	90.4965	73.5898	16.9067	8.35422e-05	0.0132745
ctg11-79915771-79915974	BosSINE2	-	3	42.7701	36.5281	50.4526	-13.9244	0.00212864	0.0396247
ctg11-79971297-79971421	BosSINE2	-	5	80.5009	88.0307	71.6469	16.3838	0.00015926	0.0148443
ctg11-80236302-80236515	BosSINE3	-	5	80.9348	88.6776	71.5154	17.1622	0.00015926	0.0148443
ctg11-80504391-80504582	BosSINE3	+	5	73.2019	83.3302	61.2438	22.0863	0.00212864	0.0396247
ctg11-80770664-80770895	BosSINE2	+	7	85.4582	92.6177	77.2908	15.3269	0.00103778	0.0285926
ctg11-81009457-81009665	BosSINE3	+	3	73.0989	83.0958	60.7949	22.301	0.00252352	0.0430208
ctg11-81061860-81062133	BosSINEL	-	6	62.9375	75.5349	47.161	28.3739	0.00015926	0.0148443
ctg11-81120020-81120238	BosSINE2	+	3	78.8328	85.8135	70.241	15.5725	0.00212864	0.0396247
ctg11-81655596-81655790	BosSINE3	+	4	59.6289	51.7461	69.3308	-17.5847	0.00266198	0.0446645
ctg11-81655825-81656050	BosSINE2	-	3	43.6458	33.0561	56.3372	-23.2811	0.000350963	0.0194558
ctg11-81836218-81836266	BosSINE3	-	4	19.0073	12.6156	26.874	-14.2584	0.00038477	0.0194558
ctg11-8185987-8186190	BosSINE3	-	3	73.4489	80.1281	65.2282	14.8999	0.000210536	0.0163489
ctg11-81936564-81936836	BosSINEL	+	6	53.8027	46.2915	63.0903	-16.7988	0.00103778	0.0285926
ctg11-8200225-8200401	BosSINE4	+	3	71.5258	76.6662	65.3577	11.3085	0.000858483	0.026256
ctg11-8229011-8229206	BosSINE3	+	5	77.5069	82.2456	71.6746	10.571	0.00298141	0.0468558
ctg11-82319807-82320018	BosSINE2	-	3	78.373	86.899	67.8795	19.0195	0.00178879	0.0363949
ctg11-8241704-8241921	BosSINE2	+	3	68.2657	74.6533	60.4462	14.2072	0.00319232	0.0492917
ctg11-82580544-82580731	BosSINE4	+	6	82.9055	91.5724	72.2078	19.3646	0.000311152	0.0180281
ctg11-82619197-82619398	BosSINE3	+	3	79.3475	86.5899	69.8736	16.7162	0.00106289	0.0292247
ctg11-82672346-82672544	BosSINE3	-	3	74.1699	81.093	65.6023	15.4907	0.00212864	0.0396247
ctg11-83098640-83098860	BosSINE2	-	4	87.4049	94.333	78.5758	15.7571	0.000311152	0.0180281
ctg11-83700877-83701097	BosSINE2	-	6	77.5374	87.1757	65.3834	21.7923	0.000311152	0.0180281
ctg11-84339110-84339329	BosSINE2	-	3	71.9561	66.0346	78.9863	-12.9516	0.000311152	0.0180281
ctg11-84658573-84658723	BosSINEL	+	5	75.7627	86.5683	62.8392	23.729	0.000311152	0.0180281
ctg11-84659692-84659959	BosSINEL	+	4	75.105	81.2623	68.6069	12.6554	0.000250236	0.0167908
ctg11-84821740-84821952	BosSINE2	+	3	75.3145	84.6417	63.2775	21.3642	0.00212864	0.0396247
ctg11-8506973-8507052	BosSINE3	+	3	76.5657	88.65	59.4739	29.1761	0.0004339	0.0209513
ctg11-85298039-85298243	BosSINE2	+	6	80.5733	90.1709	69.6516	20.5193	0.000580014	0.0224556
ctg11-85536130-85536399	BosSINEL	-	3	82.4148	91.5071	71.7457	19.7614	0.00285345	0.0468558
ctg11-86006097-86006295	BosSINE3	+	3	87.8942	93.779	80.5048	13.2742	0.00199406	0.0395272
ctg11-86043060-86043268	BosSINE3	-	4	76.9415	86.3572	65.4956	20.8615	2.67594e-05	0.0103792
ctg11-86049736-86049945	BosSINE3	+	7	43.6493	35.0545	54.2275	-19.173	0.000473624	0.0209513
ctg11-86146003-86146196	BosSINE3	-	3	47.9707	53.0875	41.6731	11.4144	0.00124915	0.0309714
ctg11-86157045-86157258	BosSINE3	+	6	80.0372	90.2553	67.7474	22.5078	0.000858483	0.026256
ctg11-86387580-86387768	BosSINE3	+	7	83.5885	95.1804	70.0533	25.1271	0.000123526	0.013894
ctg11-86395783-86395993	BosSINE3	+	4	81.855	92.1531	68.9251	23.228	0.00015926	0.0148443
ctg11-86437620-86437759	BosSINEL	+	4	79.131	92.0687	63.2077	28.8611	7.73607e-05	0.0124599
ctg11-86527975-86528250	BosSINEL	+	6	78.0406	87.3601	66.4851	20.8749	0.000473624	0.0209513
ctg11-8657433-8657635	BosSINE2	-	5	75.8356	84.005	65.9262	18.0788	0.00298141	0.0468558
ctg11-86691624-86691898	BosSINEL	+	6	76.0647	87.8661	61.5632	26.3029	0.00298141	0.0468558
ctg11-86927883-86928111	BosSINE2	+	7	79.4376	87.0872	69.9666	17.1206	0.000858483	0.026256
ctg11-871836-872040	BosSINE2	+	5	86.0637	90.8844	80.2454	10.639	0.00178879	0.0363949
ctg11-87451264-87451454	BosSINE3	+	3	68.6066	76.4805	58.7013	17.7792	0.00298141	0.0468558
ctg11-87491108-87491347	BosSINEL	+	8	61.0895	54.4808	68.963	-14.4822	0.000707298	0.0243453
ctg11-87536591-87536796	BosSINE2	+	3	75.881	68.926	84.441	-15.515	0.000126017	0.013894
ctg11-87566904-87567155	BosSINEL	-	5	73.8302	79.6048	66.9923	12.6125	0.00230253	0.0418835
ctg11-87571091-87571208	BosSINE6	-	3	24.6213	7.64479	45.5154	-37.8706	1.49417e-05	0.0093863
ctg11-87572199-87572400	BosSINE2	+	5	83.1233	89.6194	75.9406	13.6787	0.000707298	0.0243453
ctg11-87575623-87575819	BosSINE2	+	6	84.4037	93.2859	73.4718	19.8141	0.000707298	0.0243453
ctg11-87625531-87625654	BosSINE5	-	5	85.0727	93.1834	75.5877	17.5957	0.00100411	0.0285926
ctg11-87820523-87820742	BosSINE2	-	5	89.7128	94.9687	83.2962	11.6725	0.000200254	0.0158399
ctg11-87823657-87823776	BosSINE6	-	5	91.9368	96.7508	86.2845	10.4663	0.00171477	0.0363949
ctg11-88158775-88158989	BosSINE3	-	3	77.2548	87.4277	65.0013	22.4264	0.00252352	0.0430208
ctg11-88216541-88216724	BosSINE3	-	3	83.7029	88.3396	77.9962	10.3434	0.00198806	0.0394187
ctg11-88472029-88472101	BosSINE3	-	3	14.0126	6	23.8744	-17.8744	0.00092863	0.0278673
ctg11-88592173-88592392	BosSINE3	-	7	81.5664	93.7018	66.4019	27.2999	0.000858483	0.026256
ctg11-88620751-88620942	BosSINE3	+	3	85.1764	92.0615	76.7026	15.3589	0.00015926	0.0148443
ctg11-88636399-88636608	BosSINE3	+	3	70.9412	65.3123	78.3602	-13.0479	0.00307205	0.0476466
ctg11-88740674-88740864	BosSINE1	-	4	43.1317	32.968	56.6013	-23.6333	3.74489e-05	0.011357
ctg11-88773016-88773226	BosSINE3	+	4	80.4644	94.1356	63.9212	30.2144	0.000793191	0.026256
ctg11-888599-888702	BosSINE2	-	4	78.0247	73.3477	84.4855	-11.1378	0.000311152	0.0180281
ctg11-89017658-89017833	BosSINE4	-	4	84.7513	93.8945	73.4981	20.3965	0.000311152	0.0180281
ctg11-89053490-89053816	BosSINE1	+	7	29.3936	13.8284	48.9273	-35.099	0.00103778	0.0285926
ctg11-89668081-89668280	BosSINE3	-	3	57.3917	66.625	45.6187	21.0063	0.000250089	0.0167908
ctg11-89676080-89676281	BosSINE3	-	7	90.0648	94.8479	84.3143	10.5337	0.000473624	0.0209513
ctg11-89748147-89748425	BosSINEL	-	5	76.1302	84.4379	66.1564	18.2815	0.00178879	0.0363949
ctg11-89748633-89748907	BosSINEL	-	6	82.1254	90.2044	71.9444	18.26	0.000580014	0.0224556
ctg11-89755086-89755209	BosSINE2	+	3	79.2994	73.8219	86.041	-12.2192	0.000580014	0.0224556
ctg11-89908130-89908319	BosSINE3	+	4	83.578	88.4098	77.7692	10.6406	0.00252352	0.0430208
ctg11-89955554-89955740	BosSINE3	-	3	66.9538	79.9778	51.622	28.3558	0.000359381	0.0194558
ctg11-90782975-90783244	BosSINEL	-	5	80.3973	87.953	71.4295	16.5235	0.00108524	0.0293547
ctg11-90881346-90881473	BosSINEL	-	7	67.8874	81.0293	50.7886	30.2407	0.000473624	0.0209513
ctg11-9088577-9088804	BosSINE2	-	6	84.9783	91.0177	78.0455	12.9722	3.52765e-05	0.0107934
ctg11-91024728-91024840	BosSINE6	-	4	83.8629	90.2625	75.9865	14.276	0.00124915	0.0309714
ctg11-91031610-91031764	BosSINEL	-	4	79.3418	88.6457	68.0779	20.5678	7.73607e-05	0.0124599
ctg11-91042436-91042650	BosSINE3	+	4	73.3582	79.6358	65.3801	14.2557	0.000858483	0.026256
ctg11-91490972-91491190	BosSINE2	-	4	65.1462	76.9065	49.5176	27.3888	0.000101835	0.0135938
ctg11-91566530-91566614	BosSINE3	+	3	87.8016	93.3229	80.5321	12.7909	0.00192993	0.0387909
ctg11-91681669-91681893	BosSINE2	-	5	67.9427	81.1184	52.263	28.8554	9.90217e-05	0.0132745
ctg11-91764777-91764974	BosSINE4	-	3	65.2014	75.0282	53.2491	21.7791	0.00286031	0.0468558
ctg11-918178-918301	BosSINE3	+	4	86.0353	95.2594	74.6827	20.5767	0.000414629	0.0205211
ctg11-92011252-92011469	BosSINE2	-	3	78.6293	83.1479	73.0679	10.08	0.00178879	0.0363949
ctg11-9204973-9205194	BosSINE2	+	4	83.9911	89.1771	77.6917	11.4855	5.99431e-05	0.011619
ctg11-92188552-92188821	BosSINEL	+	7	82.1335	89.3889	73.2764	16.1125	0.00178879	0.0363949
ctg11-92240922-92241141	BosSINE3	-	3	67.704	78.1479	54.85	23.2979	0.000473624	0.0209513
ctg11-92340080-92340296	BosSINE2	+	3	59.8898	51.7183	70.4049	-18.6865	0.00252352	0.0430208
ctg11-92467824-92468032	BosSINE3	-	4	84.6076	90.0642	78.3115	11.7526	3.52765e-05	0.0107934
ctg11-92485918-92486144	BosSINE2	-	4	74.5836	80.8155	67.0196	13.7959	0.000580014	0.0224556
ctg11-92548166-92548350	BosSINE1	+	3	75.7006	83.6969	65.859	17.8379	0.000707298	0.0243453
ctg11-92548536-92548728	BosSINE3	-	5	75.2715	84.4537	62.781	21.6727	7.73607e-05	0.0124599
ctg11-92623525-92623702	BosSINE1	-	6	73.1115	86.6991	56.9379	29.7612	8.01604e-06	0.00881238
ctg11-92638811-92639007	BosSINE3	-	7	85.0072	90.9681	77.7413	13.2268	4.97299e-05	0.011619
ctg11-92853510-92853634	BosSINE6	-	4	87.2647	94.8566	78.8845	15.9721	0.000621137	0.0239174
ctg11-93125331-93125539	BosSINE3	-	6	93.7755	98.2808	88.211	10.0698	0.0014366	0.0334817
ctg11-93145840-93146035	BosSINE3	-	4	84.8948	95.4219	71.9385	23.4834	0.00015926	0.0148443
ctg11-93223724-93223934	BosSINE3	-	3	59.1713	54.15	65.3513	-11.2013	0.000858436	0.026256
ctg11-93266343-93266546	BosSINE3	-	4	81.6932	94.6033	65.9849	28.6184	0.000412587	0.0205211
ctg11-93266718-93266992	BosSINEL	-	6	72.9408	83.3413	60.2437	23.0976	5.9973e-05	0.011619
ctg11-93993776-93993956	BosSINE3	+	7	84.2406	92.4371	74.1527	18.2843	0.00252352	0.0430208
ctg11-94119529-94119695	BosSINE1	+	3	87.5845	96.2385	76.8661	19.3724	0.000304386	0.0180281
ctg11-94211087-94211297	BosSINE3	-	3	66.1563	73.6833	56.8923	16.791	0.000624034	0.0239174
ctg11-94214031-94214228	BosSINE3	-	4	89.9909	96.1047	82.4663	13.6383	7.88945e-05	0.012637
ctg11-94365548-94365761	BosSINE3	-	4	87.003	93.8419	78.0771	15.7648	0.00298141	0.0468558
ctg11-94405316-94405415	BosSINEL	-	4	92.4009	98.2828	85.1615	13.1213	0.00072155	0.024811
ctg11-94446623-94446812	BosSINE3	-	7	86.1506	94.0499	76.522	17.528	0.00252352	0.0430208
ctg11-95080586-95080802	BosSINE2	-	3	87.319	96.3615	76.1897	20.1717	8.59214e-05	0.0132745
ctg11-95163033-95163213	BosSINE3	+	3	81.6732	89.7423	72.1385	17.6038	0.00038477	0.0194558
ctg11-95282814-95283028	BosSINE2	+	5	83.8451	95.3283	70.8115	24.5167	0.000381556	0.0194558
ctg11-95334462-95334591	BosSINE5	-	3	92.769	98.1156	86.2897	11.8258	1.48619e-05	0.0093863
ctg11-95476368-95476567	BosSINEL	-	7	57.2596	49.155	66.9706	-17.8156	0.000858483	0.026256
ctg11-95497925-95498116	BosSINE3	+	5	77.585	84.3589	69.4731	14.8858	0.000200254	0.0158399
ctg11-95617557-95617705	BosSINE3	-	4	86.9532	94.675	77.141	17.534	0.0013664	0.0331412
ctg11-9569238-9569510	BosSINEL	-	4	77.312	82.0252	71.5785	10.4467	0.00298141	0.0468558
ctg11-95757845-95758047	BosSINE3	-	4	28.0074	12.7572	47.4095	-34.6523	0.000707298	0.0243453
ctg11-95814395-95814635	BosSINEL	-	6	83.6989	94.5344	70.3628	24.1716	0.000858483	0.026256
ctg11-96542754-96542970	BosSINE2	-	7	61.8414	54.7083	71.3772	-16.6689	0.000311152	0.0180281
ctg11-97021397-97021663	BosSINE1	-	4	81.7167	91.4432	70.2798	21.1634	3.52765e-05	0.0107934
ctg11-97040542-97040741	BosSINE2	+	5	87.872	95.2991	78.9509	16.3482	0.00108524	0.0293547
ctg11-97065814-97065889	BosSINE3	+	3	83.7782	90.2219	75.8474	14.3744	0.00298141	0.0468558
ctg11-97089885-97090155	BosSINEL	-	8	80.6907	88.9796	70.8626	18.1171	0.000200254	0.0158399
ctg11-97367433-97367644	BosSINE2	+	3	85.8019	90.8781	79.5003	11.3778	0.00178879	0.0363949
ctg11-97450631-97450761	BosSINE3	+	5	79.7434	89.3517	67.9737	21.378	5.9973e-05	0.011619
ctg11-97647044-97647283	BosSINEL	-	9	89.1945	93.9269	83.5077	10.4193	0.000473624	0.0209513
ctg11-97716669-97716880	BosSINE2	+	5	90.1566	96.4694	82.3869	14.0825	0.00265551	0.0446645
ctg11-97720614-97720690	BosSINE3	-	3	38.039	25.4911	54.8452	-29.3541	0.000229868	0.0167908
ctg11-97903360-97903466	BosSINE1	+	5	87.5145	95.3635	78.0495	17.314	0.000793191	0.026256
ctg11-98055893-98056116	BosSINE2	+	6	79.2351	89.7783	65.156	24.6223	0.000707298	0.0243453
ctg11-98150480-98150673	BosSINE1	-	6	83.1522	91.4176	72.9853	18.4323	0.00178879	0.0363949
ctg11-9815690-9816010	BosSINE1	+	4	91.4184	95.9841	85.2438	10.7403	0.000707298	0.0243453
ctg11-98251504-98251604	BosSINE3	+	5	90.2976	95.2606	84.1892	11.0714	0.000580014	0.0224556
ctg11-98454110-98454171	BosSINE5	+	3	27.7017	16.1792	41.8833	-25.7042	0.00015926	0.0148443
ctg11-98481797-98481876	BosSINE3	-	3	80.5546	95.1958	62.5346	32.6612	0.000523074	0.0224556
ctg11-98487047-98487252	BosSINE3	+	3	81.0816	85.9021	75.1487	10.7534	0.00178879	0.0363949
ctg11-98520919-98521052	BosSINE3	-	4	80.9508	91.3026	67.9354	23.3672	0.000572858	0.0224556
ctg11-98630443-98630588	BosSINE3	-	4	81.3159	93.6367	66.1519	27.4848	0.000707298	0.0243453
ctg11-98659486-98659618	BosSINE6	+	4	19.4806	7.68203	34.0019	-26.3199	8.01604e-06	0.00881238
ctg11-98662180-98662405	BosSINE2	+	5	30.2376	23.1131	39.1386	-16.0255	0.00252352	0.0430208
ctg11-98667494-98667694	BosSINE3	-	6	88.3581	93.4008	82.1045	11.2963	0.000250236	0.0167908
ctg11-98670340-98670419	BosSINE3	+	3	80.6069	93.549	64.6782	28.8708	0.00015926	0.0148443
ctg11-98772193-98772464	BosSINEL	-	12	83.1285	91.4916	72.9393	18.5523	2.00696e-05	0.0097305
ctg11-988802-989071	BosSINEL	-	4	70.0425	76.603	62.7881	13.8148	0.00171346	0.0363949
ctg11-98967966-98968171	BosSINE2	-	3	63.3879	72.7728	51.7092	21.0636	0.000473624	0.0209513
ctg11-98968926-98969126	BosSINE3	+	5	64.8266	71.9106	56.1077	15.8029	0.00149782	0.0334817
ctg11-98975318-98975511	BosSINE3	+	6	84.8185	96.1145	70.8786	25.2359	0.00198042	0.0394187
ctg11-99003784-99003892	BosSINE6	+	3	17.3375	2.77153	35.0395	-32.268	0.000287243	0.0180281
ctg11-99004003-99004226	BosSINEL	-	7	47.6339	42.6228	53.8473	-11.2245	0.00178879	0.0363949
ctg11-99011103-99011232	BosSINE6	-	3	26.742	13.8167	42.65	-28.8333	0.000580014	0.0224556
ctg11-99397791-99398010	BosSINE2	+	5	85.1108	94.5156	74.0646	20.451	0.00126071	0.0309714
ctg11-99452383-99452708	BosSINE1	-	5	89.3921	96.715	80.5677	16.1473	0.000124242	0.013894
ctg11-99571299-99571484	BosSINEL	+	7	66.1842	78.4121	51.1346	27.2774	0.000311152	0.0180281
ctg11-99631021-99631198	BosSINEL	-	4	66.044	70.7344	60.2712	10.4632	0.00149782	0.0334817
ctg11-99680102-99680316	BosSINE3	+	3	82.0897	91.7115	70.2474	21.464	0.000858483	0.026256
ctg11-99782519-99782634	BosSINE6	+	4	87.9388	96.1211	77.8683	18.2528	0.0017112	0.0363949
ctg11-99813328-99813555	BosSINE2	+	6	87.0167	92.4387	80.4731	11.9657	7.73607e-05	0.0124599
ctg11-99996173-99996398	BosSINEL	+	9	81.1425	87.9125	72.6426	15.2699	0.000580014	0.0224556
ctg12-10077184-10077385	BosSINE3	+	4	77.979	82.5209	72.0672	10.4537	0.00124915	0.0309714
ctg12-10111766-10111947	BosSINEL	+	3	70.0201	76.8228	61.8676	14.9551	0.00038477	0.0194558
ctg12-10290326-10290521	BosSINE2	+	3	76.483	83.3571	68.9756	14.3814	0.00307205	0.0476466
ctg12-10316109-10316248	BosSINE2	+	4	80.3515	91.3891	66.4407	24.9484	0.00178879	0.0363949
ctg12-10421300-10421574	BosSINEL	+	10	76.4263	81.5471	70.054	11.4931	0.000858483	0.026256
ctg12-10464666-10464870	BosSINE2	+	4	72.5336	83.9718	56.4877	27.4841	0.00212864	0.0396247
ctg12-10522453-10522754	BosSINE1	+	4	77.6075	83.2996	70.6875	12.6121	0.00184607	0.0372002
ctg12-10570162-10570369	BosSINE2	-	3	86.7916	91.4644	81.3004	10.1639	0.00149782	0.0334817
ctg12-10659061-10659330	BosSINEL	-	9	47.0061	38.5687	57.4139	-18.8452	3.52765e-05	0.0107934
ctg12-10769362-10769637	BosSINEL	-	6	78.9314	84.1853	72.4605	11.7247	7.73607e-05	0.0124599
ctg12-10923530-10923737	BosSINE2	+	4	75.6858	84.3088	66.5941	17.7147	0.0017067	0.0363949
ctg12-11144181-11144355	BosSINE3	-	4	77.8707	85.5516	68.4173	17.1343	0.000858483	0.026256
ctg12-11200663-11200933	BosSINEL	+	9	78.4457	82.9629	72.6874	10.2755	0.000473624	0.0209513
ctg12-11222120-11222276	BosSINE3	+	5	73.288	86.8524	57.2318	29.6206	1.49417e-05	0.0093863
ctg12-11222448-11222502	BosSINE3	+	4	76.5487	89.9173	60.3442	29.5731	7.73607e-05	0.0124599
ctg12-11233112-11233326	BosSINE2	+	8	89.2963	95.9386	81.2442	14.6944	3.33622e-05	0.0107934
ctg12-11257383-11257582	BosSINE2	-	4	26.4119	14.9115	40.3314	-25.4199	0.000473624	0.0209513
ctg12-11348420-11348649	BosSINE2	+	9	88.2263	97.0029	77.3417	19.6612	4.97299e-05	0.011619
ctg12-11371027-11371277	BosSINEL	-	4	12.4274	2.14609	25.3919	-23.2458	0.000729675	0.0250149
ctg12-11372920-11373129	BosSINE3	-	6	40.0787	30.4325	52.1804	-21.7479	0.00298141	0.0468558
ctg12-11514902-11515167	BosSINE1	-	3	90.7188	95.2923	85.085	10.2072	0.000924575	0.0278673
ctg12-11526273-11526495	BosSINE2	-	3	89.2611	95.0697	82.3167	12.753	0.000200254	0.0158399
ctg12-11718021-11718217	BosSINE3	-	4	83.5987	92.5007	72.5248	19.9759	0.00230253	0.0418835
ctg12-11746991-11747256	BosSINEL	+	6	91.9644	97.2776	85.425	11.8526	0.000847085	0.026256
ctg12-11750156-11750367	BosSINE3	+	3	74.8925	89.33	58.6452	30.6848	0.000503503	0.0218488
ctg12-11761663-11761875	BosSINE3	-	4	85.081	92.6516	75.7635	16.8881	0.00015926	0.0148443
ctg12-12085048-12085258	BosSINE3	+	9	80.2862	89.9253	68.636	21.2893	0.000858483	0.026256
ctg12-12159268-12159478	BosSINE3	+	3	89.272	94.3417	82.6551	11.6865	0.00305752	0.0476466
ctg12-12190929-12191138	BosSINE3	+	5	85.6204	90.0825	79.8612	10.2213	0.00298141	0.0468558
ctg12-12414879-12415153	BosSINEL	-	8	75.4806	82.5922	66.5762	16.016	0.00212864	0.0396247
ctg12-12463813-12464045	BosSINE2	+	5	85.317	95.8805	72.7531	23.1274	0.00036041	0.0194558
ctg12-12579119-12579307	BosSINE2	-	3	87.0928	93.5316	79.7273	13.8044	0.0026041	0.0442828
ctg12-12723540-12723641	BosSINE6	+	3	81.2155	88.0125	72.85	15.1625	0.000624034	0.0239174
ctg12-12727881-12728086	BosSINE1	+	7	84.5438	92.3107	74.9846	17.3261	1.09926e-05	0.00901759
ctg12-12764084-12764295	BosSINE3	+	7	67.8013	73.5196	60.5315	12.9881	0.00298141	0.0468558
ctg12-12965778-12966050	BosSINEL	-	4	28.0956	20.732	37.5379	-16.8059	2.67594e-05	0.0103792
ctg12-13033435-13033691	BosSINEL	+	7	82.0959	89.0088	74.346	14.6628	2.67594e-05	0.0103792
ctg12-13094229-13094356	BosSINE2	+	3	83.2455	91.3327	73.2026	18.1301	0.000473624	0.0209513
ctg12-13323088-13323309	BosSINE2	+	5	74.9657	82.313	65.715	16.598	0.000858483	0.026256
ctg12-13405596-13405800	BosSINE3	-	4	81.8776	87.5391	74.9096	12.6294	0.0013664	0.0331412
ctg12-13791577-13791721	BosSINE2	+	4	72.0758	79.3527	63.2423	16.1103	4.62101e-05	0.0113782
ctg12-13993030-13993124	BosSINE3	+	3	76.1851	88.2981	61.616	26.682	0.000126017	0.013894
ctg12-14002152-14002358	BosSINE3	+	4	83.8513	88.2072	78.155	10.0522	0.00298141	0.0468558
ctg12-14083932-14084161	BosSINE2	+	3	69.6724	80.3031	56.2701	24.033	0.00124915	0.0309714
ctg12-14261413-14261678	BosSINEL	+	6	86.9904	92.3003	80.882	11.4182	0.00298141	0.0468558
ctg12-14391445-14391657	BosSINE2	-	5	76.9004	92.1731	57.8159	34.3572	0.000250236	0.0167908
ctg12-14484782-14484951	BosSINE2	+	10	60.1868	73.4773	42.6625	30.8148	0.000858483	0.026256
ctg12-14488527-14488737	BosSINE3	-	4	82.5168	88.0773	75.6731	12.4043	8.01604e-06	0.00881238
ctg12-14495517-14495647	BosSINE5	-	6	88.2322	95.0089	79.431	15.5778	0.000200254	0.0158399
ctg12-14520163-14520369	BosSINE3	-	6	64.2353	74.6203	51.4538	23.1665	0.000580014	0.0224556
ctg12-14590723-14590987	BosSINEL	-	8	17.3281	3.77565	32.5657	-28.7901	0.00184607	0.0372002
ctg12-14593160-14593391	BosSINEL	+	4	76.8887	87.46	63.5935	23.8665	0.000381556	0.0194558
ctg12-14634023-14634175	BosSINE2	-	3	82.4885	94.1067	68.9026	25.2041	7.73607e-05	0.0124599
ctg12-14660749-14661007	BosSINEL	+	3	80.8408	86.4362	73.8521	12.5841	0.00298141	0.0468558
ctg12-14694399-14694593	BosSINE4	-	4	85.38	93.2843	75.8731	17.4112	0.000529773	0.0224556
ctg12-14705556-14705750	BosSINE3	+	6	89.4202	96.8104	80.4663	16.3441	0.000789641	0.026256
ctg12-14726520-14726782	BosSINEL	-	5	60.0171	68.5369	49.9589	18.578	0.00218173	0.0403321
ctg12-14931911-14932111	BosSINE3	-	4	78.7453	91.6234	62.8952	28.7282	7.21215e-05	0.0124599
ctg12-14961997-14962176	BosSINE2	-	7	77.709	83.0844	71.0134	12.071	0.00212864	0.0396247
ctg12-15072344-15072455	BosSINE3	-	3	79.5056	92.3408	63.5819	28.7589	0.000473624	0.0209513
ctg12-15436673-15436801	BosSINE6	-	3	24.7069	10.3567	42.122	-31.7653	0.00274753	0.0459938
ctg12-15448201-15448321	BosSINE6	-	6	55.4439	60.963	48.3734	12.5896	0.000473624	0.0209513
ctg12-15464654-15464843	BosSINE2	-	5	77.3938	83.6612	69.7738	13.8874	0.00212864	0.0396247
ctg12-15497550-15497731	BosSINE2	-	8	84.4716	96.3131	70.2576	26.0555	8.01604e-06	0.00881238
ctg12-15518037-15518250	BosSINE3	-	3	84.0736	94.1	71.7333	22.3667	5.9973e-05	0.011619
ctg12-15552388-15552517	BosSINE6	+	3	84.7718	93.1969	74.4026	18.7943	0.00303942	0.0476466
ctg12-15576459-15576598	BosSINEL	+	4	45.5253	31.0789	63.4859	-32.407	0.00252352	0.0430208
ctg12-15651488-15651713	BosSINE2	+	10	82.4519	93.002	69.5372	23.4648	0.000250236	0.0167908
ctg12-15723439-15723518	BosSINE3	-	4	36.2759	17.4242	59.4779	-42.0537	0.00214001	0.0396247
ctg12-15845465-15845587	BosSINE6	-	5	82.5476	92.8156	69.3803	23.4353	0.000473624	0.0209513
ctg12-15891832-15892033	BosSINE3	+	4	79.9158	87.9506	69.4574	18.4931	0.000311152	0.0180281
ctg12-16308267-16308471	BosSINE3	+	6	77.9399	90.4745	62.5128	27.9617	0.00298141	0.0468558
ctg12-16308916-16309189	BosSINEL	-	8	76.1045	92.0262	58.9401	33.086	0.00038477	0.0194558
ctg12-16356784-16356919	BosSINE2	+	4	27.9582	13.7328	45.4663	-31.7335	0.00149782	0.0334817
ctg12-16458981-16459190	BosSINE3	+	4	47.8099	37.2942	60.9352	-23.641	0.00212864	0.0396247
ctg12-16512429-16512617	BosSINE4	-	5	23.1626	14.0826	34.5528	-20.4702	0.000311152	0.0180281
ctg12-16514661-16514778	BosSINE3	+	3	78.5945	93.5091	60.6628	32.8463	4.97299e-05	0.011619
ctg12-16547239-16547456	BosSINE3	-	6	83.3179	95.2842	68.553	26.7312	0.000731465	0.0250149
ctg12-16549142-16549354	BosSINE3	+	4	82.0755	88.0876	75.3375	12.7501	0.00178879	0.0363949
ctg12-16616850-16616953	BosSINE2	-	3	86.9669	93.1104	79.5051	13.6053	0.0013664	0.0331412
ctg12-16616868-16616974	BosSINEL	-	4	88.131	93.2903	81.8981	11.3922	0.00149782	0.0334817
ctg12-16622442-16622665	BosSINE2	+	6	89.6462	96.0689	81.9577	14.1112	0.000473624	0.0209513
ctg12-16670232-16670444	BosSINE3	+	8	81.2791	94.3732	65.0397	29.3334	0.00038477	0.0194558
ctg12-16671112-16671384	BosSINEL	+	7	75.4428	80.3838	69.565	10.8187	0.00252352	0.0430208
ctg12-16675713-16675906	BosSINE3	+	3	91.3682	96.3157	85.4199	10.8959	0.000291964	0.0180281
ctg12-16703715-16703971	BosSINEL	+	4	79.0481	92.9664	61.5568	31.4096	9.90217e-05	0.0132745
ctg12-17557733-17557952	BosSINE3	+	3	87.8994	92.4458	82.3038	10.142	0.00103778	0.0285926
ctg12-17571741-17571931	BosSINE3	-	5	89.9497	96.1484	82.2313	13.9171	2.67594e-05	0.0103792
ctg12-17844766-17844960	BosSINE3	-	3	82.2187	93.1427	69.263	23.8797	0.00214001	0.0396247
ctg12-17884843-17885045	BosSINE2	+	6	88.3816	95.024	80.2064	14.8175	0.00252352	0.0430208
ctg12-17887928-17888127	BosSINE3	+	3	87.0619	96.4375	74.5611	21.8764	9.79041e-05	0.0132745
ctg12-17942612-17942828	BosSINE2	+	7	89.2576	96.5013	80.3423	16.159	5.74679e-06	0.00881238
ctg12-17976143-17976371	BosSINE2	-	4	84.2994	92.1367	75.2427	16.894	0.00124915	0.0309714
ctg12-18043679-18043869	BosSINE3	-	4	79.0679	84.9283	71.3939	13.5345	0.00252352	0.0430208
ctg12-18108278-18108474	BosSINE1	+	3	69.391	76.7249	60.4026	16.3223	0.00147414	0.0334817
ctg12-1815129-1815320	BosSINE1	+	9	84.6773	92.4997	74.4919	18.0078	0.000346134	0.0194558
ctg12-18256819-18257030	BosSINE3	-	4	82.5341	90.2734	73.0087	17.2648	3.52765e-05	0.0107934
ctg12-18282497-18282708	BosSINE2	-	3	84.6822	90.2562	77.8218	12.4345	0.00103778	0.0285926
ctg12-18410797-18411017	BosSINE2	+	5	83.7462	88.8944	77.41	11.4844	0.000126017	0.013894
ctg12-18480892-18481046	BosSINE4	-	3	65.9391	58.0997	75.6573	-17.5576	0.00212864	0.0396247
ctg12-18503409-18503633	BosSINE2	+	6	89.7408	94.8052	83.6091	11.1961	0.00015926	0.0148443
ctg12-18507799-18507954	BosSINE2	-	5	88.5306	93.1952	82.6541	10.5411	0.00285345	0.0468558
ctg12-18561092-18561279	BosSINE3	-	6	88.4487	95.0246	80.4987	14.5259	0.000148393	0.0148443
ctg12-18615557-18615678	BosSINE2	+	4	85.3289	94.5335	74.6692	19.8643	4.09643e-06	0.00846538
ctg12-18639354-18639537	BosSINE2	-	4	89.6524	96.8087	81.3441	15.4646	0.00020342	0.0160501
ctg12-18649054-18649177	BosSINE6	+	4	83.4914	90.9984	74.2519	16.7465	0.00149782	0.0334817
ctg12-18875394-18875528	BosSINE5	+	3	86.2679	93.8292	76.1861	17.6431	0.00146376	0.0334817
ctg12-19006473-19006748	BosSINEL	+	12	74.1572	81.4708	65.342	16.1289	0.000580014	0.0224556
ctg12-19156442-19156649	BosSINE3	-	5	88.0999	94.9181	79.9662	14.9519	0.000488955	0.0212516
ctg12-19353354-19353555	BosSINE3	-	4	86.3834	93.4422	77.4308	16.0113	0.000707298	0.0243453
ctg12-19356726-19356926	BosSINE2	-	3	49.781	55.449	42.8051	12.6438	0.000126017	0.013894
ctg12-19390895-19390965	BosSINE5	+	3	78.6023	89.349	65.3756	23.9733	1.97454e-06	0.00754262
ctg12-19404986-19405111	BosSINE1	-	6	85.9131	92.7366	77.6622	15.0744	0.00149782	0.0334817
ctg12-19418215-19418437	BosSINE2	-	7	93.1163	98.0451	87.05	10.9951	0.000488955	0.0212516
ctg12-19428240-19428506	BosSINEL	+	12	80.1544	92.5739	65.5696	27.0043	0.000580014	0.0224556
ctg12-19692581-19692770	BosSINE2	+	3	83.4609	89.9479	75.4769	14.471	0.00212864	0.0396247
ctg12-19768539-19768813	BosSINEL	-	4	53.096	41.8201	66.8671	-25.047	5.9973e-05	0.011619
ctg12-19846719-19846927	BosSINE3	-	3	87.298	94.7615	77.9135	16.848	0.00255011	0.0434545
ctg12-2002866-2003067	BosSINEL	-	5	77.9572	82.7391	71.96	10.7791	0.000707298	0.0243453
ctg12-20174528-20174753	BosSINE2	-	3	50.9615	59.9135	39.9436	19.97	0.00252352	0.0430208
ctg12-20188889-20189163	BosSINEL	+	6	83.0588	89.6034	75.425	14.1784	0.00149782	0.0334817
ctg12-20237464-20237595	BosSINEL	+	5	88.2764	97.8042	77.13	20.6742	3.71197e-05	0.0112843
ctg12-20237627-20237689	BosSINE2	+	5	76.3717	86.1275	64.3646	21.7629	0.000473624	0.0209513
ctg12-20252773-20252985	BosSINE3	-	5	62.367	70.0204	53.2392	16.7812	0.00124915	0.0309714
ctg12-20354619-20354758	BosSINE2	-	5	32.9941	22.48	45.9346	-23.4546	0.0021373	0.0396247
ctg12-20451059-20451271	BosSINE3	-	4	86.8284	91.568	80.9952	10.5728	0.000707298	0.0243453
ctg12-20500322-20500534	BosSINE3	-	4	67.6651	79.0992	53.5923	25.5069	0.000148393	0.0148443
ctg12-20541468-20541686	BosSINE2	+	4	82.5163	87.4833	77.05	10.4333	0.000450363	0.0209513
ctg12-20584969-20585186	BosSINE3	-	4	77.9328	82.6141	72.1712	10.4429	3.52765e-05	0.0107934
ctg12-20591493-20591679	BosSINE3	+	4	29.1263	35.7355	21.195	14.5405	0.00038477	0.0194558
ctg12-20594787-20595061	BosSINEL	+	8	78.7077	83.827	72.1507	11.6762	0.000126017	0.013894
ctg12-20789526-20789800	BosSINEL	+	7	85.4405	91.5786	77.8041	13.7745	0.00038477	0.0194558
ctg12-21028089-21028310	BosSINE3	-	3	84.1845	94.9729	70.9064	24.0665	0.000176916	0.0158399
ctg12-21110211-21110411	BosSINE3	-	4	91.5647	96.1093	85.5133	10.596	0.0030322	0.0475828
ctg12-21173078-21173207	BosSINE6	-	4	79.8315	94.582	61.6769	32.9051	0.000789641	0.026256
ctg12-21174425-21174621	BosSINE3	+	6	89.7796	96.8182	81.4615	15.3566	0.000103017	0.0136341
ctg12-21218708-21218929	BosSINE2	-	4	49.3841	40.2801	60.1912	-19.9111	0.000126017	0.013894
ctg12-21244802-21245076	BosSINEL	-	8	74.681	87.3368	59.8514	27.4854	0.000858483	0.026256
ctg12-21280718-21280917	BosSINE1	-	3	38.2443	28.7437	49.9372	-21.1934	0.000858483	0.026256
ctg12-21333396-21333614	BosSINE2	+	8	84.6533	92.566	74.8645	17.7015	0.00252352	0.0430208
ctg12-21616594-21616865	BosSINEL	+	12	11.3697	3.63802	20.8915	-17.2534	0.000126017	0.013894
ctg12-21710910-21711084	BosSINEL	-	7	12.9939	4.47953	24.0892	-19.6097	0.000267631	0.0178845
ctg12-21730626-21730816	BosSINE3	-	5	74.9532	86.3371	61.0511	25.286	0.00171346	0.0363949
ctg12-21838090-21838357	BosSINEL	+	5	49.2001	57.0966	39.8162	17.2805	4.62101e-05	0.0113782
ctg12-21909062-21909242	BosSINE3	+	3	70.0948	83.4594	53.6462	29.8132	0.000529773	0.0224556
ctg12-21909477-21909616	BosSINEL	-	4	64.2034	70.3039	56.534	13.7699	0.00038477	0.0194558
ctg12-21970366-21970469	BosSINE3	+	4	77.719	90.2859	62.2519	28.034	0.000126017	0.013894
ctg12-22067246-22067424	BosSINEL	+	4	75.4445	82.2231	67.6135	14.6096	0.00149782	0.0334817
ctg12-22080085-22080299	BosSINE3	+	5	73.3781	86.1302	56.4192	29.7109	0.000473624	0.0209513
ctg12-22092493-22092637	BosSINE2	-	4	81.7173	90.3784	71.9476	18.4308	0.000311152	0.0180281
ctg12-22112982-22113150	BosSINE2	-	3	70.1839	64.5792	77.0821	-12.5029	0.00212864	0.0396247
ctg12-22199196-22199319	BosSINE3	+	4	79.7456	88.1057	70.0337	18.0721	0.00124915	0.0309714
ctg12-22304687-22304912	BosSINE2	-	4	87.4679	92.9789	80.3421	12.6368	0.00178879	0.0363949
ctg12-22398651-22398861	BosSINE3	-	3	76.9253	85.6883	66.1255	19.5627	3.52765e-05	0.0107934
ctg12-22432516-22432735	BosSINE2	+	3	73.2742	78.2885	67.2487	11.0398	0.00252352	0.0430208
ctg12-22481509-22481719	BosSINE3	-	3	68.2108	76.8754	57.8474	19.028	5.9973e-05	0.011619
ctg12-23008078-23008272	BosSINE3	+	5	55.9548	49.8262	63.7568	-13.9306	7.73607e-05	0.0124599
ctg12-23055910-23056025	BosSINE6	-	3	74.1057	82.7738	62.7376	20.0362	0.000296533	0.0180281
ctg12-23120381-23120572	BosSINE3	-	4	84.8759	90.686	77.5782	13.1078	0.00252352	0.0430208
ctg12-23364363-23364573	BosSINE2	-	3	75.0529	81.6219	66.9679	14.6539	0.00178879	0.0363949
ctg12-23373068-23373267	BosSINE2	+	3	83.3711	88.4407	77.1098	11.3309	5.9973e-05	0.011619
ctg12-23611303-23611510	BosSINE3	-	3	81.4185	86.8187	74.287	12.5318	0.000311152	0.0180281
ctg12-23617766-23617960	BosSINE3	+	3	78.8057	85.9448	70.0192	15.9256	0.00038477	0.0194558
ctg12-23674083-23674251	BosSINEL	-	5	78.6983	92.2178	62.1297	30.0881	0.000311152	0.0180281
ctg12-23702653-23702927	BosSINEL	-	3	80.6054	85.2767	75.2154	10.0613	0.00015926	0.0148443
ctg12-23733369-23733586	BosSINE3	-	4	21.8858	13.2977	32.4558	-19.1581	0.00103778	0.0285926
ctg12-24226602-24226799	BosSINE3	+	4	84.3646	89.3956	78.3223	11.0733	0.00252352	0.0430208
ctg12-24294885-24295146	BosSINEL	-	5	85.0543	90.8352	78.1158	12.7194	3.52765e-05	0.0107934
ctg12-24310778-24311029	BosSINEL	+	3	40.0174	30.8223	50.7878	-19.9655	0.00178879	0.0363949
ctg12-24597162-24597351	BosSINE2	-	4	69.4213	75.6606	61.909	13.7516	0.000200254	0.0158399
ctg12-24781897-24782063	BosSINE1	+	3	82.7893	88.5838	76.35	12.2338	7.73607e-05	0.0124599
ctg12-24948858-24949030	BosSINEL	-	5	82.6193	92.4406	70.5315	21.9091	0.000311152	0.0180281
ctg12-24988582-24988803	BosSINE3	-	3	77.6702	89.6183	64.1872	25.4311	0.00151984	0.0338594
ctg12-25018756-25018985	BosSINE2	-	6	69.4829	63.1922	77.2593	-14.0671	0.000858483	0.026256
ctg12-25100864-25101066	BosSINE3	-	4	83.6547	89.9069	77.6848	12.2221	0.00214001	0.0396247
ctg12-25181240-25181509	BosSINEL	+	10	46.3955	38.0818	56.6047	-18.5229	0.00252352	0.0430208
ctg12-25492204-25492276	BosSINE3	-	3	82.7598	92.5213	70.6552	21.8661	0.00092863	0.0278673
ctg12-25667610-25667882	BosSINEL	+	7	28.4599	14.8036	45.6223	-30.8188	3.52765e-05	0.0107934
ctg12-25699435-25699737	BosSINE1	-	5	84.348	91.2151	76.1423	15.0728	9.90217e-05	0.0132745
ctg12-25793183-25793297	BosSINE3	-	3	64.55	74.1688	52.7115	21.4572	0.000580014	0.0224556
ctg12-26231234-26231420	BosSINE1	-	5	84.7698	91.2141	77.0122	14.202	0.000250236	0.0167908
ctg12-26406442-26406651	BosSINE2	+	5	88.2252	93.41	82.02	11.39	2.00696e-05	0.0097305
ctg12-26571606-26571899	BosSINEL	+	7	78.1632	89.5091	65.5389	23.9702	0.0010314	0.0285926
ctg12-26666558-26666833	BosSINEL	+	9	78.8157	83.8197	72.8714	10.9483	0.00178879	0.0363949
ctg12-27464233-27464383	BosSINE2	+	3	56.2989	63.0667	47.9692	15.0974	5.9973e-05	0.011619
ctg12-27548676-27548889	BosSINE2	-	4	86.054	90.9102	79.7274	11.1828	0.00015926	0.0148443
ctg12-2785901-2786113	BosSINE2	-	3	74.9672	80.8592	67.3611	13.4981	0.000669587	0.0243453
ctg12-27864790-27865003	BosSINE2	-	4	89.6138	94.0969	83.6365	10.4604	0.00178879	0.0363949
ctg12-27919937-27920209	BosSINEL	-	6	87.0502	92.2871	80.3462	11.9409	3.52765e-05	0.0107934
ctg12-28723465-28723682	BosSINE3	+	3	75.9152	91.4905	59	32.4905	0.00216128	0.0399893
ctg12-28767709-28767910	BosSINE3	+	4	88.6797	96.1984	79.426	16.7725	0.000732573	0.0250149
ctg12-28890866-28891077	BosSINE3	+	3	84.1031	92.026	73.4494	18.5766	5.9973e-05	0.011619
ctg12-29032889-29033116	BosSINE2	-	5	86.7459	94.2908	77.4314	16.8594	0.00252352	0.0430208
ctg12-29089833-29090038	BosSINE2	+	10	84.2301	92.4629	73.6779	18.7851	0.000580014	0.0224556
ctg12-29157011-29157224	BosSINE3	-	3	87.8409	95.7687	77.9296	17.8392	0.0002563	0.0171763
ctg12-29180177-29180386	BosSINE3	+	6	88.7758	93.9106	82.3581	11.5525	4.97299e-05	0.011619
ctg12-29184431-29184661	BosSINE2	-	3	86.2076	92.5285	78.5654	13.9632	0.00265228	0.0446645
ctg12-29212058-29212263	BosSINE2	+	3	80.584	93.3754	64.1836	29.1919	0.000991155	0.0285926
ctg12-29290541-29290802	BosSINEL	+	8	83.0654	91.7685	72.8589	18.9096	0.00103778	0.0285926
ctg12-29294575-29294769	BosSINE3	-	7	79.7343	92.0099	64.5562	27.4537	5.9973e-05	0.011619
ctg12-29372973-29373189	BosSINE2	-	7	87.3923	94.4835	78.1989	16.2846	5.74679e-06	0.00881238
ctg12-29421825-29422051	BosSINE2	-	3	83.8288	92.2158	73.8347	18.3811	0.00149782	0.0334817
ctg12-2965676-2965889	BosSINE2	-	4	13.467	3.23173	26.3244	-23.0926	0.000572858	0.0224556
ctg12-29709328-29709401	BosSINE3	+	4	62.298	70.4148	51.0932	19.3216	0.00101178	0.0285926
ctg12-30052521-30052724	BosSINE3	+	3	74.9393	88.3289	59.0825	29.2464	0.00317567	0.0490667
ctg12-30052845-30053072	BosSINE2	-	4	85.9716	93.2313	77.0365	16.1947	0.000311152	0.0180281
ctg12-30133211-30133332	BosSINEL	+	5	59.8183	49.7367	71.9515	-22.2148	7.73607e-05	0.0124599
ctg12-30301745-30301937	BosSINE3	-	4	81.3777	87.042	74.3981	12.6439	0.00015926	0.0148443
ctg12-30412883-30413089	BosSINE2	-	3	81.7222	93.7409	67.4246	26.3163	0.000250236	0.0167908
ctg12-30558388-30558498	BosSINE6	-	3	85.204	92.3741	76.3936	15.9805	0.000126017	0.013894
ctg12-30568762-30568935	BosSINE2	+	4	78.7784	91.4719	63.1558	28.3161	7.73607e-05	0.0124599
ctg12-30583737-30583940	BosSINE2	+	5	78.0024	88.4035	65.3058	23.0977	0.00212864	0.0396247
ctg12-30626262-30626487	BosSINE3	+	8	79.6815	89.7469	67.2933	22.4536	0.00124915	0.0309714
ctg12-30693456-30693611	BosSINE3	-	3	67.6511	75.4813	58.0141	17.4671	0.00149782	0.0334817
ctg12-30771416-30771690	BosSINEL	+	9	83.9094	88.483	78.2053	10.2777	0.000858483	0.026256
ctg12-30826525-30826851	BosSINE1	+	3	90.4468	95.1108	85.0282	10.0826	0.000296533	0.0180281
ctg12-30936382-30936583	BosSINE3	+	3	86.0345	93.3583	77.0205	16.3378	0.00286031	0.0468558
ctg12-31019488-31019621	BosSINE3	-	3	78.4649	87.0492	67.7855	19.2638	0.000580014	0.0224556
ctg12-31021542-31021741	BosSINE3	-	5	72.998	86.1381	56.4519	29.6863	0.000126017	0.013894
ctg12-31073529-31073803	BosSINEL	+	8	77.3549	82.0608	71.5264	10.5344	0.00212864	0.0396247
ctg12-31163794-31163921	BosSINE6	+	3	79.5121	86.8844	70.4385	16.4459	0.000707298	0.0243453
ctg12-31357768-31357992	BosSINE3	-	4	68.8849	74.9074	61.5152	13.3921	0.000200254	0.0158399
ctg12-31443193-31443309	BosSINE6	+	3	78.8571	88.4708	66.8057	21.6652	0.00307205	0.0476466
[truncated: 12,617 more rows]

## Sheet: S4B_DM_LINE
Table S4B Differentially methylated LINE retrotransposons identified in bovine milk somatic cells related to Subclinical mastitis
ID (a unique identifier based on LINE genomic coordinates, combining chromosome, start, and end positions)	family	strand	n_cpg	mean DNA methylation level in all samples	mean DNA methylation level in samples with S.aureus subclinical masistiis	mean DNA methylation level in controls samples	DNA methylation change	p_value	p_adj
ctg1-230047-230216	BosL1B	-	3	25.5345	30.8469	18.9962	11.8507	0.000580014	0.032187
ctg1-230457-231112	BosBovB	+	10	46.585	51.2819	40.8042	10.4776	0.00015926	0.0223249
ctg1-248707-250725	BosL1A3	+	9	53.5809	58.2125	47.9239	10.2886	0.00103778	0.0393834
ctg1-258038-259061	BosBovB	-	5	60.399	65.5294	54.0846	11.4448	4.62101e-05	0.017501
ctg1-351985-354137	BosBovB	-	10	65.4422	70.3775	59.3681	11.0094	0.000311152	0.0262875
ctg1-433178-433765	BosBovB	-	6	58.1776	64.137	50.8429	13.294	0.00178879	0.0484939
ctg1-442564-444905	BosL1A3	+	12	50.7398	57.3475	42.6872	14.6603	0.00038477	0.028234
ctg1-542733-544002	BosL1A6	+	3	51.5144	44.851	59.7154	-14.8643	7.73607e-05	0.0192534
ctg1-544702-545474	BosBovB	+	4	76.051	84.1562	66.8609	17.2953	3.52765e-05	0.0168683
ctg1-584130-585117	BosL1B	+	3	68.9954	76.7344	59.4705	17.2639	8.01604e-06	0.0139836
ctg1-591266-591477	BosL1A6	-	3	69.0092	75.7354	60.7308	15.0046	0.000580014	0.032187
ctg1-655092-655235	BosBovB	+	3	68.9144	77.251	58.6538	18.5972	9.90217e-05	0.0201357
ctg1-799167-799222	BosBovB	-	3	64.3686	73.0225	52.6657	20.3568	0.000669587	0.0344551
ctg1-1543125-1543468	BosL1B	+	3	89.1617	95.8274	81.241	14.5864	8.01604e-06	0.0139836
ctg1-1870311-1870980	BosL1A2	+	3	33.853	20.0622	49.7654	-29.7032	0.00100411	0.0393834
ctg1-1929320-1929612	BosL1B	-	8	13.8315	1.70195	28.7601	-27.0581	0.000331426	0.0278816
ctg1-2127800-2127945	BosBovB	+	7	88.8282	95.2008	80.9322	14.2685	0.00178879	0.0484939
ctg1-2174188-2174814	BosBovB	-	5	84.856	93.3361	74.5051	18.8311	0.000250236	0.0249233
ctg1-2611971-2612316	BosL1B	+	3	54.9084	50.2847	60.6201	-10.3354	0.00038477	0.028234
ctg1-3856090-3856796	BosBovB	-	4	87.1021	92.1882	81.5875	10.6007	0.000793191	0.0368467
ctg1-4200584-4200858	BosL1A6	-	4	73.0488	84.0086	59.3278	24.6808	0.000311152	0.0262875
ctg1-4559102-4559816	BosBovB	+	3	84.1064	88.7578	78.0871	10.6708	0.00171346	0.0484939
ctg1-4675104-4675547	BosBovB	-	4	41.2852	29.145	54.7948	-25.6498	0.000530614	0.032187
ctg1-4791521-4792636	BosBovB	-	4	76.1674	80.8766	70.5986	10.278	0.00149782	0.0450387
ctg1-4964827-4965524	BosBovB	-	5	72.653	79.8352	63.9208	15.9144	0.00038477	0.028234
ctg1-5001085-5003702	BosBovB	+	10	72.4733	77.304	66.7342	10.5698	0.000530614	0.032187
ctg1-5392569-5393002	BosL1B	+	3	69.7724	77.2196	60.6504	16.5692	0.000580014	0.032187
ctg1-5777945-5777997	BosBovB	+	3	85.259	91.5716	77.6622	13.9094	0.00092863	0.0393834
ctg1-6843448-6843653	BosBovB	+	8	80.7747	91.8076	67.4534	24.3542	0.000200254	0.0236464
ctg1-7018139-7018939	BosBovB	+	7	82.9134	91.9618	72.5305	19.4313	0.000250236	0.0249233
ctg1-8134792-8135057	BosL1A1	-	6	71.3174	80.7303	59.8875	20.8428	0.000707298	0.0344551
ctg1-10377663-10378313	BosL1B	+	3	77.2548	89.0427	63.3231	25.7196	0.00184607	0.0497498
ctg1-10660342-10660425	BosBovB	-	3	87.6045	97.7833	75.6705	22.1127	0.00117183	0.0422702
ctg1-10661903-10662443	BosL1A3	+	10	78.44	86.3141	69.3073	17.0068	0.000473624	0.0303043
ctg1-11321924-11323256	BosBovB	-	6	76.6011	81.1294	71.1185	10.011	0.000858483	0.0368467
ctg1-11685498-11686643	BosBovB	-	4	61.9443	68.3794	53.6557	14.7237	0.00124915	0.0422702
ctg1-11690074-11690568	BosBovB	+	7	75.4709	81.7148	67.3679	14.3468	0.00103778	0.0393834
ctg1-11750955-11752766	BosBovB	-	8	57.7928	62.9512	51.1344	11.8168	0.00103778	0.0393834
ctg1-11965205-11967516	BosL1A3	+	3	61.1524	65.6614	55.5338	10.1276	0.00124915	0.0422702
ctg1-12485204-12485991	BosBovB	+	7	75.6901	81.0085	69.0679	11.9405	0.00149782	0.0450387
ctg1-14389881-14390371	BosBovB	+	4	67.1777	76.1241	56.3025	19.8216	0.000825002	0.0368467
ctg1-14468532-14471189	BosBovB	+	19	74.2662	79.5809	67.7877	11.7933	0.000200254	0.0236464
ctg1-14583930-14585219	BosBovB	-	3	76.863	81.5131	70.5456	10.9675	0.000311152	0.0262875
ctg1-16228690-16229215	BosL1B	-	3	68.5448	77.0396	58.0897	18.9498	1.32618e-06	0.0126103
ctg1-16292912-16294084	BosBovB	-	7	66.6001	72.4768	59.4444	13.0324	0.000103831	0.020933
ctg1-17157248-17158335	BosBovB	+	5	76.2764	81.2131	70.4812	10.732	0.000580014	0.032187
ctg1-17547051-17547666	BosBovB	-	4	71.7539	82.0515	59.8288	22.2227	0.00103778	0.0393834
ctg1-17981424-17982025	BosBovB	-	4	69.9626	75.4137	63.4817	11.932	0.000200254	0.0236464
ctg1-18250247-18250347	BosBovB	+	4	84.1769	89.0566	78.0907	10.9659	0.000473624	0.0303043
ctg1-18300679-18301018	BosL1A2	+	4	77.0612	84.3945	69.9494	14.4451	9.90217e-05	0.0201357
ctg1-19703675-19704225	BosBovB	+	3	69.2824	61.5443	78.3798	-16.8356	0.000200254	0.0236464
ctg1-20673843-20674181	BosBovB	-	3	81.3515	74.1868	88.8895	-14.7028	0.000793191	0.0368467
ctg1-21033002-21033807	BosBovB	-	7	72.3302	64.7045	81.8825	-17.178	0.00124915	0.0422702
ctg1-21110267-21110746	BosL1B	+	16	80.9058	90.5519	69.5054	21.0464	0.000858483	0.0368467
ctg1-23617455-23617885	BosBovB	-	3	67.2764	61.9479	74.7605	-12.8126	0.000580014	0.032187
ctg1-25490018-25490449	BosBovB	-	5	69.0582	63.7952	75.3771	-11.5819	0.00124915	0.0422702
ctg1-27145542-27145855	BosBovB	+	3	83.2856	88.8646	76.4192	12.4454	0.000350963	0.028234
ctg1-28102748-28103609	BosBovB	-	4	61.6775	68.8309	52.9695	15.8614	0.00015926	0.0223249
ctg1-28506065-28507822	BosBovB	+	11	83.3041	88.0798	77.9574	10.1224	7.73607e-05	0.0192534
ctg1-28523157-28523357	BosBovB	-	10	41.4333	28.1194	57.705	-29.5856	0.000707298	0.0344551
ctg1-28523656-28523731	BosBovB	+	3	72.4678	64.7052	82.0218	-17.3166	0.000200254	0.0236464
ctg1-31120927-31121183	BosBovB	+	3	79.9828	88.4635	69.5449	18.9187	0.00103778	0.0393834
ctg1-31682853-31683377	BosBovB	+	4	81.6804	86.6917	75.8981	10.7936	0.000843915	0.0368467
ctg1-32561538-32562167	BosBovB	-	5	55.717	61.1394	48.9626	12.1768	0.000707298	0.0344551
ctg1-33764311-33766380	BosBovB	+	6	65.768	72.1851	57.9585	14.2265	2.67594e-05	0.0161846
ctg1-34550220-34550784	BosBovB	+	8	79.5249	85.1117	72.7543	12.3573	0.000858483	0.0368467
ctg1-35513897-35515520	BosBovB	-	7	76.3315	83.2762	67.7853	15.491	0.00038477	0.028234
ctg1-35587396-35587760	BosL1B	-	3	80.0437	85.2729	73.6077	11.6652	0.00178879	0.0484939
ctg1-35717727-35718062	BosL1B	-	4	77.2818	82.5644	70.9054	11.6591	0.00178879	0.0484939
ctg1-36536500-36537269	BosBovB	+	3	62.6961	67.4302	56.886	10.5442	0.000473624	0.0303043
ctg1-39376242-39376431	BosBovB	-	3	89.9086	84.7395	96.0643	-11.3248	0.00112605	0.0422184
ctg1-40441481-40441777	BosL1A6	+	4	64.5409	70.0224	58.2199	11.8025	0.000580014	0.032187
ctg1-41037310-41037639	BosBovB	+	4	75.1301	81.5998	66.7864	14.8134	0.000200254	0.0236464
ctg1-41624124-41625175	BosBovB	+	5	45.114	38.7301	52.8408	-14.1106	0.000858483	0.0368467
ctg1-42950002-42950556	BosL1A3	-	15	54.9038	62.4945	45.1878	17.3068	0.00015926	0.0223249
ctg1-42950599-42951381	BosL1A3	-	16	72.7606	83.1881	59.8606	23.3274	0.000580014	0.032187
ctg1-43032389-43032535	BosBovB	-	4	24.2098	8.89896	42.4731	-33.5741	0.00038477	0.028234
ctg1-43078535-43079045	BosBovB	-	6	71.1147	66.0042	77.4045	-11.4003	0.000858483	0.0368467
ctg1-43337277-43338762	BosL1B	+	4	83.2205	88.6674	76.5269	12.1405	0.000858483	0.0368467
ctg1-43349204-43350997	BosL1B	+	5	80.1146	88.0989	70.8955	17.2034	3.52765e-05	0.0168683
ctg1-44624835-44625090	BosL1B	+	5	87.8363	94.3059	79.6498	14.6561	4.62101e-05	0.017501
ctg1-45006422-45007209	BosL1A3	-	11	84.6485	89.5408	78.5959	10.9449	0.000473624	0.0303043
ctg1-45199671-45199770	BosBovB	-	6	91.3628	96.1161	85.8782	10.2379	0.00068698	0.0344551
ctg1-46067603-46068411	BosBovB	-	8	59.9315	64.9212	53.7533	11.1679	0.00149782	0.0450387
ctg1-46606910-46607703	BosL1A3	-	11	87.6494	92.4222	81.7752	10.647	9.90217e-05	0.0201357
ctg1-46607750-46608586	BosL1A3	-	10	78.8643	89.5009	66.0141	23.4868	0.00149782	0.0450387
ctg1-47459091-47459187	BosBovB	+	3	82.5373	88.3932	75.5312	12.862	0.00103778	0.0393834
ctg1-47502042-47502821	BosBovB	-	4	76.019	80.8811	70.4189	10.4622	0.000473624	0.0303043
ctg1-47894528-47894767	BosBovB	+	6	71.8618	80.6208	61.6657	18.955	0.00149782	0.0450387
ctg1-48287908-48288114	BosL1A7	-	3	74.9262	86.1527	62.0909	24.0618	0.000515791	0.032187
ctg1-48288369-48289384	BosBovB	-	4	69.2561	78.1521	58.4176	19.7345	9.90217e-05	0.0201357
ctg1-48299151-48299689	BosBovB	+	5	63.4902	67.9694	57.7519	10.2175	0.000473624	0.0303043
ctg1-48641181-48641383	BosL1A3	+	3	77.4322	82.6629	71.0485	11.6145	0.000388881	0.0285246
ctg1-48641438-48641509	BosL1A3	+	3	67.7032	74.3485	59.4756	14.8728	0.000858483	0.0368467
ctg1-49868889-49869724	BosL1A2	+	26	79.054	84.928	71.9046	13.0234	0.00038477	0.028234
ctg1-49957282-49957726	BosBovB	+	3	90.9025	96.4696	84.1974	12.2721	0.00136453	0.0450387
ctg1-51744117-51744437	BosL1B	+	3	81.1724	88.7677	71.8244	16.9433	0.00171346	0.0484939
ctg1-52247916-52248781	BosL1B	+	6	90.6309	96.2971	83.7433	12.5538	0.00038477	0.028234
ctg1-52973576-52974059	BosL1A6	+	4	82.9125	88.0391	76.6029	11.4362	0.00178879	0.0484939
ctg1-53494478-53496650	BosL1A3	-	31	77.12	85.094	66.8692	18.2248	0.000126017	0.0210476
ctg1-53599659-53600821	BosBovB	-	12	65.0188	72.3657	55.7028	16.6629	0.00015926	0.0223249
ctg1-55140413-55141008	BosBovB	-	8	75.9856	80.9332	69.9267	11.0065	0.000350963	0.028234
ctg1-56538218-56538912	BosBovB	-	9	82.6613	88.4208	75.6636	12.7573	0.00103778	0.0393834
ctg1-57173447-57173715	BosL1B	+	3	19.5971	4.56875	38.0936	-33.5248	0.000675247	0.0344551
ctg1-58431249-58431447	BosBovB	+	3	84.8586	90.9594	77.35	13.6094	0.000575562	0.032187
ctg1-58826952-58827671	BosBovB	+	4	73.9783	85.7942	59.6433	26.1509	0.00038477	0.028234
ctg1-59742053-59743481	BosBovB	+	4	81.7702	90.3939	71.1433	19.2506	0.000200254	0.0236464
ctg1-61668878-61669082	BosL1A8	+	7	68.3011	75.2026	59.5266	15.676	0.00149782	0.0450387
ctg1-62880699-62881648	BosBovB	+	9	77.7841	82.5768	71.9831	10.5937	0.000707298	0.0344551
ctg1-63007636-63007705	BosBovB	+	6	86.4012	91.4341	80.7141	10.72	0.00147414	0.0450387
ctg1-63167189-63168713	BosBovB	+	9	57.9546	62.5322	52.1442	10.3881	0.00149782	0.0450387
ctg1-63711774-63712967	BosBovB	+	3	78.0972	87.7588	65.5228	22.2359	0.000311152	0.0262875
ctg1-63817784-63823273	BosL1A8	+	9	80.553	86.365	73.6499	12.7151	7.73607e-05	0.0192534
ctg1-64817659-64817919	BosL1B	+	3	89.7364	96.2219	81.7061	14.5158	0.00126071	0.0424657
ctg1-64845872-64846296	BosBovB	+	4	52.0052	43.3359	62.675	-19.3391	0.00015926	0.0223249
ctg1-65702200-65703496	BosL1A6	-	5	77.1344	81.9688	70.9998	10.969	0.00015926	0.0223249
ctg1-65750935-65752464	BosL1B	-	9	78.7282	86.0038	69.7735	16.2303	0.000250236	0.0249233
ctg1-70648552-70649221	BosL1B	+	4	89.8797	95.6609	82.7644	12.8965	0.00124915	0.0422702
ctg1-73145163-73145609	BosBovB	-	7	72.5873	67.2224	79.598	-12.3756	0.00015926	0.0223249
ctg1-73885878-73885984	BosBovB	-	5	84.7955	94.0813	73.5062	20.5751	0.000580014	0.032187
ctg1-73895785-73895851	BosBovB	-	4	87.9843	94.3191	80.2997	14.0194	5.9973e-05	0.0184022
ctg1-73952027-73952851	BosBovB	-	4	85.6803	93.4698	76.3247	17.1451	0.000200254	0.0236464
ctg1-74924771-74925910	BosBovB	+	5	77.758	82.8171	71.1595	11.6576	0.000250236	0.0249233
ctg1-75643863-75644277	BosBovB	-	4	79.6751	84.2072	74.1878	10.0194	0.000250236	0.0249233
ctg1-75704422-75705324	BosBovB	+	10	76.668	81.6445	70.0608	11.5837	0.000473624	0.0303043
ctg1-79482164-79483182	BosBovB	-	8	85.9357	92.0817	78.2324	13.8493	0.00149782	0.0450387
ctg1-80402305-80402947	BosL1B	+	5	72.9054	79.9259	64.4238	15.5021	0.000126017	0.0210476
ctg1-80851353-80852298	BosBovB	-	6	68.515	63.0458	75.3527	-12.3068	0.00149782	0.0450387
ctg1-80904964-80905813	BosL1B	-	4	88.7026	94.0625	82.1058	11.9567	0.00124915	0.0422702
ctg1-81850448-81850743	BosBovB	+	6	71.279	76.776	64.8006	11.9754	0.00124915	0.0422702
ctg1-81872813-81873513	BosBovB	-	4	75.796	87.2996	61.949	25.3505	0.000707298	0.0344551
ctg1-81927776-81928374	BosL1A5	-	3	89.0595	94.1115	82.7927	11.3188	0.000473624	0.0303043
ctg1-82333457-82333685	BosBovB	+	5	90.1227	98.146	80.4888	17.6572	9.6349e-05	0.0201357
ctg1-85684086-85684256	BosL1A6	-	3	81.3593	87.7785	73.0804	14.6981	0.00038477	0.028234
ctg1-86353551-86353845	BosBovB	-	4	83.2763	87.9102	77.5731	10.3371	0.000707298	0.0344551
ctg1-87568643-87568853	BosBovB	-	10	64.1503	73.7808	52.499	21.2818	0.00103778	0.0393834
ctg1-89624621-89624851	BosL1A3	+	4	86.4054	95.8253	74.8123	21.013	0.000391908	0.0287298
ctg1-91453248-91454787	BosL1B	-	3	73.3221	68.3121	79.8782	-11.5661	0.00147414	0.0450387
ctg1-91967161-91967513	BosL1B	+	3	75.8082	82.4406	67.2712	15.1695	0.000200254	0.0236464
ctg1-93437620-93437807	BosBovB	-	3	74.2991	68.6979	82.2206	-13.5227	0.00178879	0.0484939
ctg1-94507499-94508142	BosBovB	+	4	71.4034	77.582	63.799	13.783	4.62101e-05	0.017501
ctg1-94949205-94950742	BosBovB	+	9	89.5305	94.2625	83.5916	10.6709	0.000311152	0.0262875
ctg1-97430694-97431000	BosBovB	+	5	37.754	21.9541	56.3332	-34.3791	0.00184607	0.0497498
ctg1-97613937-97614084	BosL1A6	-	3	81.0276	90.1083	69.8513	20.2571	2.67594e-05	0.0161846
ctg1-98576010-98576107	BosBovB	-	4	83.5536	95.4103	70.1878	25.2225	0.00145628	0.0450387
ctg1-99862248-99862735	BosBovB	-	3	83.3189	90.3129	74.5142	15.7987	0.00178879	0.0484939
ctg1-105648196-105649623	BosL1A6	-	4	53.88	60.1405	46.2837	13.8568	0.00103778	0.0393834
ctg1-107652499-107652988	BosBovB	-	5	77.7376	82.955	71.3162	11.6388	0.00149782	0.0450387
ctg1-108116655-108117107	BosL1B	+	3	81.8093	88.8876	73.4244	15.4633	5.74679e-06	0.0139836
ctg1-112864749-112864930	BosBovB	+	3	83.2057	88.8583	76.3295	12.5288	0.00038477	0.028234
ctg1-113397256-113397362	BosBovB	-	4	90.0803	96.9805	82.1716	14.8089	0.000591754	0.0328095
ctg1-113953659-113954955	BosBovB	-	4	91.3373	96.003	85.7335	10.2695	0.00103778	0.0393834
ctg1-113999685-114002669	BosL1A3	-	23	85.5916	90.7686	79.2226	11.5459	4.62101e-05	0.017501
ctg1-114096955-114098462	BosBovB	+	7	87.2869	92.2918	80.9663	11.3255	4.62101e-05	0.017501
ctg1-114334446-114334821	BosL1A1	-	6	84.238	90.4245	77.0961	13.3284	0.001255	0.0424151
ctg1-114356704-114357537	BosBovB	+	5	88.9568	94.5756	81.8917	12.684	0.000580014	0.032187
ctg1-115960971-115961078	BosBovB	+	4	92.3425	98.0755	85.7568	12.3188	2.72172e-05	0.0163826
ctg1-116019576-116020262	BosBovB	-	5	82.7607	87.4969	76.9154	10.5815	0.00178879	0.0484939
ctg1-116030756-116031063	BosL1B	-	3	80.5984	88.8544	70.1311	18.7233	0.000858483	0.0368467
ctg1-116049291-116049387	BosBovB	+	3	90.6759	96.6218	84.5806	12.0413	0.00119482	0.0422702
ctg1-116094457-116094715	BosL1A5	+	3	78.8289	86.3231	70.3472	15.9759	0.000527869	0.032187
ctg1-116108140-116108821	BosL1A6	+	4	86.8854	92.2799	80.4393	11.8406	0.00038477	0.028234
ctg1-116131223-116132794	BosBovB	-	12	79.8067	84.9191	73.7213	11.1978	0.00124915	0.0422702
ctg1-116145435-116146085	BosL1A3	-	8	75.528	88.8897	59.5669	29.3228	0.00015926	0.0223249
ctg1-116212848-116214047	BosL1B	+	3	82.3766	87.1813	76.5857	10.5956	0.00149782	0.0450387
ctg1-116252621-116254048	BosL1A3	-	7	72.1054	78.4735	64.1293	14.3441	0.000473624	0.0303043
ctg1-116390788-116394123	BosBovB	-	10	83.5004	88.5839	77.834	10.75	0.000473624	0.0303043
ctg1-116415471-116416265	BosBovB	-	3	79.999	86.4014	72.2326	14.1689	0.00149782	0.0450387
ctg1-116889378-116889500	BosBovB	-	3	49.9293	56.849	41.4128	15.4361	0.000473624	0.0303043
ctg1-118778050-118778710	BosBovB	-	4	83.9026	91.8953	74.0654	17.8299	4.62101e-05	0.017501
ctg1-119054129-119054559	BosBovB	-	5	43.9721	49.2707	37.5836	11.6871	4.62101e-05	0.017501
ctg1-119422141-119422551	BosL1A6	+	3	82.2868	88.0951	75.0695	13.0256	0.000858483	0.0368467
ctg1-119447005-119447305	BosL1A2	-	3	90.8836	96.9857	83.0396	13.9461	0.00146858	0.0450387
ctg1-120274515-120274660	BosBovB	-	3	54.165	61.8428	44.9795	16.8634	9.90217e-05	0.0201357
ctg1-121539796-121539927	BosBovB	-	3	71.8305	77.8177	64.4615	13.3562	0.00108524	0.0407167
ctg1-121891736-121892808	BosBovB	+	3	72.7084	79.1267	65.0474	14.0793	0.00178879	0.0484939
ctg1-122374925-122375137	BosBovB	-	3	89.4552	95.018	82.6173	12.4007	0.000473624	0.0303043
ctg1-124743966-124744761	BosBovB	+	11	64.9847	58.5269	73.2605	-14.7336	0.000580014	0.032187
ctg1-125888150-125889052	BosL1B	+	3	87.1052	92.5719	80.3769	12.195	5.9973e-05	0.0184022
ctg1-125922916-125923328	BosBovB	+	6	71.4759	65.5177	78.788	-13.2703	0.000250236	0.0249233
ctg1-126469710-126470595	BosBovB	-	7	86.9153	92.4138	80.1647	12.2492	9.90217e-05	0.0201357
ctg1-126730702-126730956	BosL1B	-	5	91.5497	97.4944	84.2331	13.2613	0.000209023	0.0245301
ctg1-128742641-128742899	BosBovB	-	5	57.9383	66.318	47.9029	18.4151	0.00124915	0.0422702
ctg1-129075212-129075818	BosBovB	+	3	81.5218	85.9694	75.9182	10.0513	0.00015926	0.0223249
ctg1-129706917-129706981	BosBovB	-	7	82.696	90.2191	73.081	17.1382	0.00181226	0.0490913
ctg1-129898555-129898916	BosL1B	+	5	75.8183	81.2388	69.4465	11.7923	0.000473624	0.0303043
ctg1-131227820-131228603	BosL1A3	+	21	82.0022	88.2354	74.6057	13.6297	0.000250236	0.0249233
ctg1-131612261-131612687	BosBovB	-	3	54.8597	63.7344	43.5064	20.228	0.000311152	0.0262875
ctg1-131646940-131647677	BosBovB	+	3	75.6535	81.1862	69.7853	11.401	0.000858483	0.0368467
ctg1-131839175-131840914	BosBovB	+	5	73.5002	78.4145	67.4854	10.9291	0.00103778	0.0393834
ctg1-133153714-133154612	BosL1A2	-	4	91.3712	95.7195	85.6826	10.0369	0.000311152	0.0262875
ctg1-133217712-133218515	BosBovB	-	3	56.8213	46.9865	68.9256	-21.9392	0.00149782	0.0450387
ctg1-133529810-133534425	BosL1B	-	16	78.1139	83.2052	71.6804	11.5248	8.01604e-06	0.0139836
ctg1-133903029-133903613	BosBovB	-	9	86.7453	91.9195	80.0693	11.8502	0.000473624	0.0303043
ctg1-134010649-134010883	BosL1B	-	5	17.3124	5.64875	31.935	-26.2862	0.000580014	0.032187
ctg1-135700075-135700852	BosL1A3	+	18	86.5	91.9336	79.7508	12.1828	0.00178879	0.0484939
ctg1-136691635-136694061	BosBovB	-	3	79.9746	86.4257	72.4438	13.9819	0.00147414	0.0450387
ctg1-136703600-136704702	BosBovB	+	7	59.182	64.5356	52.4404	12.0952	5.74679e-06	0.0139836
ctg1-136802175-136802614	BosL1B	-	3	82.5141	87.9008	75.2818	12.619	0.00101178	0.0393834
ctg1-137244445-137244851	BosBovB	+	5	87.9248	93.0773	82.008	11.0693	0.000414629	0.0301142
ctg1-137519098-137521151	BosBovB	-	16	80.1338	85.0272	74.9439	10.0832	0.00015926	0.0223249
ctg1-137522895-137525664	BosBovB	+	14	76.9048	81.6325	71.6208	10.0118	0.00124915	0.0422702
ctg1-137576564-137577086	BosBovB	+	6	67.6174	74.0871	59.5394	14.5477	0.000858483	0.0368467
ctg1-137588934-137590000	BosBovB	+	7	68.339	74.6008	60.7136	13.8872	0.000250236	0.0249233
ctg1-137643312-137644542	BosBovB	+	5	67.5632	74.1968	59.8628	14.334	0.000858483	0.0368467
ctg1-137708764-137708832	BosBovB	-	3	82.4173	88.5714	75.5387	13.0328	0.00103778	0.0393834
ctg1-137746463-137749499	BosBovB	-	15	67.6965	72.8439	61.4358	11.4081	0.00038477	0.028234
ctg1-137800000-137801383	BosL1B	+	3	67.2649	73.7833	59.2423	14.541	9.90217e-05	0.0201357
ctg1-137810388-137811323	BosBovB	-	4	57.44	65.5653	47.4232	18.142	3.52765e-05	0.0168683
ctg1-137851722-137852749	BosL1B	-	4	62.5876	68.804	54.9016	13.9024	0.000575562	0.032187
ctg1-137852854-137853950	BosL1B	-	6	74.9503	80.9198	67.6032	13.3166	0.000580014	0.032187
ctg1-137923495-137924392	BosL1B	+	5	75.2718	79.8047	69.7208	10.0839	0.000580014	0.032187
ctg1-137947783-137949126	BosBovB	-	10	72.322	77.1484	66.4508	10.6976	0.000707298	0.0344551
ctg1-137990450-137991476	BosBovB	+	6	75.5511	80.254	69.8694	10.3846	0.000250236	0.0249233
ctg1-138031315-138031728	BosL1A6	-	5	70.5861	76.6788	63.484	13.1948	0.00147414	0.0450387
ctg1-138045035-138045336	BosBovB	-	3	74.4116	82.3794	63.7303	18.6491	2.70818e-05	0.0163271
ctg1-138175297-138176877	BosBovB	+	7	69.5293	74.6005	63.2184	11.3821	0.000473624	0.0303043
ctg1-138274579-138275689	BosL1A6	+	4	70.7326	75.5613	64.8652	10.6962	0.000858483	0.0368467
ctg1-138358308-138359170	BosBovB	+	6	68.8319	74.2584	62.7782	11.4802	0.00103778	0.0393834
ctg1-138522858-138523263	BosBovB	+	4	78.637	85.1426	70.8273	14.3153	0.00124915	0.0422702
ctg1-138726313-138726875	BosL1A6	-	8	75.5326	86.3791	60.6848	25.6943	1.49417e-05	0.014777
ctg1-139161429-139162486	BosL1B	-	5	81.3125	86.529	74.6434	11.8856	9.90217e-05	0.0201357
ctg1-139521551-139522072	BosBovB	+	4	82.5871	88.1167	76.2067	11.9099	0.000843915	0.0368467
ctg1-139782222-139783000	BosL1A3	-	17	73.6658	81.7304	64.185	17.5453	0.000707298	0.0344551
ctg1-141231496-141233602	BosL1A3	+	18	64.8379	71.0942	57.1874	13.9068	7.73607e-05	0.0192534
ctg1-142194953-142195637	BosBovB	-	3	87.5169	92.2882	81.5674	10.7208	0.00184607	0.0497498
ctg1-142536984-142537135	BosBovB	-	4	74.1059	69.5914	79.9729	-10.3815	0.00124915	0.0422702
ctg1-142575975-142577026	BosBovB	+	4	83.6064	94.7703	69.6317	25.1386	0.000126017	0.0210476
ctg1-142590357-142591395	BosL1A6	+	6	58.4149	49.1161	69.8596	-20.7435	0.00149782	0.0450387
ctg1-142856440-142856901	BosBovB	+	7	91.1854	97.0457	84.0794	12.9663	0.000924575	0.0393834
ctg1-142986552-142986893	BosL1B	-	8	69.7061	60.9194	80.0433	-19.1239	4.62101e-05	0.017501
ctg1-143605903-143606831	BosBovB	+	13	86.2541	92.0305	78.8793	13.1512	0.000250236	0.0249233
ctg1-143951894-143952149	BosL1B	-	6	80.9989	90.038	69.8737	20.1643	0.000580014	0.032187
ctg1-144220628-144220713	BosBovB	+	3	45.0057	36.4208	55.5718	-19.151	0.00124915	0.0422702
ctg1-144670557-144670888	BosL1B	+	3	87.0353	94.4497	78.0141	16.4356	0.000575562	0.032187
ctg1-144805582-144805722	BosBovB	-	4	79.7552	87.3398	70.4202	16.9197	7.73607e-05	0.0192534
ctg1-145031453-145032105	BosL1A4	+	4	73.7	81.3187	64.3231	16.9957	0.000473624	0.0303043
ctg1-145492641-145493592	BosL1B	-	4	81.5007	87.8284	73.7029	14.1255	3.52765e-05	0.0168683
ctg1-145701381-145702527	BosL1B	-	3	83.1236	88.9302	75.9769	12.9533	0.00103778	0.0393834
ctg1-146097201-146097293	BosBovB	-	4	43.0797	29.8703	59.3375	-29.4672	0.000250236	0.0249233
ctg1-147400761-147400910	BosBovB	+	4	27.853	8.86406	51.224	-42.36	0.000793191	0.0368467
ctg1-147459259-147460450	BosBovB	+	8	85.8118	91.8	78.6937	13.1064	0.00178879	0.0484939
ctg1-148594548-148595013	BosBovB	-	3	90.2931	97.274	81.7013	15.5727	0.000435894	0.0303043
ctg1-149636349-149636734	BosL1A2	-	3	87.5925	93.6354	80.1551	13.4803	0.000176916	0.0236464
ctg1-149854380-149854516	BosBovB	-	8	88.8934	95.2531	80.9653	14.2878	9.90217e-05	0.0201357
ctg1-149952254-149952381	BosL1B	-	4	36.9701	26.0453	50.9754	-24.9301	0.00149782	0.0450387
ctg1-150266304-150267336	BosBovB	+	5	71.8375	78.3485	63.624	14.7245	0.00124915	0.0422702
ctg1-150704851-150705554	BosBovB	+	6	86.0471	91.2765	79.4821	11.7945	0.00149782	0.0450387
ctg1-150712867-150713046	BosL1B	+	3	15.6272	3.59095	30.7667	-27.1757	0.000265387	0.0262875
ctg1-150712878-150713066	BosL1A7	+	3	15.6272	3.59095	30.7667	-27.1757	0.000265387	0.0262875
ctg1-150760675-150761145	BosBovB	-	4	83.0314	89.6763	74.9184	14.7579	0.000311152	0.0262875
ctg1-150922974-150923588	BosBovB	-	3	80.4579	86.8471	72.7278	14.1193	0.00038477	0.028234
ctg1-151213151-151213406	BosL1A1	+	3	81.5975	89.6	71.684	17.916	0.000858483	0.0368467
ctg1-151275622-151275702	BosBovB	+	4	20.9772	6.38594	38.9356	-32.5496	0.000279537	0.0262875
ctg1-151287072-151287719	BosL1B	+	6	61.1057	55.5168	68.4263	-12.9095	0.00149782	0.0450387
ctg1-151299811-151300003	BosL1B	+	3	19.0615	5.26354	36.0436	-30.78	0.00156854	0.0470188
ctg1-151356800-151357063	BosL1B	+	4	67.9629	59.5665	78.007	-18.4405	7.73607e-05	0.0192534
ctg1-151618783-151621496	BosBovB	-	15	76.4211	81.8536	69.9666	11.8869	0.000200254	0.0236464
ctg1-152635593-152636442	BosL1A8	-	3	84.069	79.2742	89.9086	-10.6344	3.52765e-05	0.0168683
ctg1-152889840-152890280	BosL1A6	+	10	89.6931	95.5517	82.3719	13.1798	0.00108524	0.0407167
ctg1-153443733-153443878	BosL1B	+	3	14.423	4.73542	26.3462	-21.6107	0.00176562	0.0484939
ctg1-154350285-154350622	BosL1B	+	7	89.1275	95.5594	81.01	14.5494	0.000575562	0.032187
ctg1-154602089-154602242	BosL1A8	+	3	38.1362	23.4954	59.1697	-35.6743	0.000168992	0.0236101
ctg1-154782510-154782832	BosBovB	-	6	68.9936	62.6527	76.87	-14.2173	1.49417e-05	0.014777
ctg1-154856048-154856973	BosL1B	-	7	87.1928	92.825	80.2374	12.5876	0.000580014	0.032187
ctg1-155882133-155882407	BosL1A6	-	3	79.2724	73.8708	86.3259	-12.455	0.000296533	0.0262875
ctg1-155979578-155980068	BosL1A6	+	5	81.264	86.7209	75.0262	11.6947	4.62101e-05	0.017501
ctg1-156809214-156809839	BosL1A5	-	3	22.6672	8.9875	39.5038	-30.5163	0.000847085	0.0368467
ctg1-157042216-157042759	BosBovB	+	5	79.1472	84.7647	72.4778	12.2869	2.67594e-05	0.0161846
ctg1-157689986-157692212	BosBovB	+	5	71.6628	76.6354	65.8751	10.7603	0.00149782	0.0450387
ctg1-157705226-157705699	BosBovB	-	4	69.8397	77.9375	59.8731	18.0644	5.74679e-06	0.0139836
ctg1-158142719-158143591	BosL1A6	-	5	64.7942	70.2373	57.7564	12.4809	3.52765e-05	0.0168683
ctg1-158229447-158229566	BosBovB	-	7	85.0675	91.7365	76.9819	14.7546	5.9973e-05	0.0184022
ctg1-158354557-158354991	BosBovB	+	3	88.6287	97.1562	78.1333	19.0229	0.00055859	0.032187
ctg1-158402359-158403018	BosL1B	-	19	82.9066	91.8515	72.1575	19.694	0.00015926	0.0223249
ctg2-318912-321125	BosBovB	-	9	60.8887	66.1075	54.7663	11.3412	0.000311152	0.0262875
ctg2-323178-326305	BosL1A6	-	6	54.7695	60.1853	47.9206	12.2647	0.000707298	0.0344551
ctg2-405959-411028	BosL1A2	-	16	69.4113	74.996	62.8625	12.1335	0.000580014	0.032187
ctg2-485090-486095	BosBovB	+	4	65.4447	71.9935	57.3633	14.6302	0.00178879	0.0484939
ctg2-502818-505561	BosL1B	+	5	68.1579	73.845	61.1585	12.6865	0.00038477	0.028234
ctg2-552949-554009	BosBovB	-	4	73.9931	79.3832	67.2026	12.1806	0.00149782	0.0450387
ctg2-738456-738590	BosL1B	+	3	86.1506	93.096	78.0605	15.0356	0.00146706	0.0450387
ctg2-972326-973040	BosL1A6	+	3	87.9515	94.7708	80.2103	14.5606	0.00103778	0.0393834
ctg2-1145163-1145965	BosL1B	+	9	52.4127	43.664	62.4385	-18.7745	0.000707298	0.0344551
ctg2-1484040-1485238	BosL1B	-	4	69.6961	74.9556	64.0644	10.8912	1.09926e-05	0.0145334
ctg2-1631485-1632936	BosL1A3	-	10	58.061	67.2321	46.8084	20.4238	7.73607e-05	0.0192534
ctg2-1904868-1905325	BosBovB	-	7	76.0672	81.1567	69.8132	11.3435	0.00124915	0.0422702
ctg2-2488081-2488190	BosBovB	-	4	84.5713	95.025	71.5042	23.5208	0.000358925	0.028234
ctg2-2506774-2508524	BosBovB	-	4	76.1363	80.7144	70.6127	10.1018	9.90217e-05	0.0201357
ctg2-2578049-2578637	BosBovB	+	4	66.7696	71.6625	61.1271	10.5354	0.00124915	0.0422702
ctg2-2744009-2744132	BosBovB	-	4	82.8052	88.5047	75.7904	12.7143	9.90217e-05	0.0201357
ctg2-2848690-2849896	BosBovB	-	4	82.0711	86.9461	76.4938	10.4523	0.00038477	0.028234
ctg2-3563435-3565174	BosBovB	-	7	82.0955	86.9688	76.3571	10.6117	0.00015926	0.0223249
ctg2-3588447-3588698	BosL1A3	-	4	79.3472	87.1522	69.4695	17.6827	0.0012514	0.0423313
ctg2-5130330-5131119	BosBovB	+	7	90.867	97.4777	82.7308	14.7469	0.000176916	0.0236464
ctg2-5531779-5531808	BosBovB	+	3	83.4655	94.099	70.3782	23.7208	0.00010322	0.0208992
ctg2-5729863-5729926	BosBovB	-	5	47.5282	37.055	60.909	-23.854	5.9973e-05	0.0184022
ctg2-7564324-7564653	BosL1A6	+	3	71.2144	78.3445	62.1348	16.2097	0.000473624	0.0303043
ctg2-8515840-8516455	BosL1B	-	3	83.9362	88.6042	78.191	10.4131	0.00124915	0.0422702
ctg2-8942838-8944907	BosBovB	-	10	80.9216	86.5183	74.0925	12.4258	0.000858483	0.0368467
ctg2-9167694-9168552	BosBovB	-	3	83.3427	90.716	74.3681	16.348	8.01604e-06	0.0139836
ctg2-9255966-9256726	BosBovB	+	5	79.7524	85.7042	73.299	12.4052	5.9973e-05	0.0184022
ctg2-9358484-9362491	BosL1A3	-	51	80.7153	88.5357	71.1444	17.3913	0.000707298	0.0344551
ctg2-9655564-9656218	BosBovB	+	8	92.8818	97.5809	87.4625	10.1184	0.00117239	0.0422702
ctg2-10187536-10187606	BosBovB	-	4	83.0785	90.8543	74.8156	16.0387	0.00093443	0.0393834
ctg2-10481013-10481315	BosBovB	-	3	68.5946	76.5187	59.7887	16.73	0.00124915	0.0422702
ctg2-10872141-10872800	BosBovB	-	3	75.4242	80.0833	69.4152	10.6681	0.000707298	0.0344551
ctg2-10980035-10980521	BosL1B	-	3	64.7096	70.8193	57.3004	13.5189	0.00124915	0.0422702
ctg2-10990197-10990638	BosL1B	-	5	61.6515	66.4046	56.4029	10.0016	0.000200254	0.0236464
ctg2-11160841-11161887	BosBovB	-	6	60.9443	66.1039	54.7168	11.3871	0.000311152	0.0262875
ctg2-11943614-11944371	BosBovB	+	7	69.9084	74.3979	64.1754	10.2225	0.00015926	0.0223249
ctg2-12864649-12865938	BosL1A3	+	23	71.174	81.8262	58.7463	23.0799	1.09926e-05	0.0145334
ctg2-14308424-14310308	BosBovB	-	5	69.8463	62.822	77.9867	-15.1647	0.000311152	0.0262875
ctg2-15078636-15078978	BosL1B	-	4	84.7828	91.9119	76.4337	15.4782	1.09926e-05	0.0145334
ctg2-15173150-15173602	BosBovB	+	4	21.2046	11.0073	33.3572	-22.3499	0.00178879	0.0484939
ctg2-15301065-15302134	BosBovB	+	4	83.4003	89.0703	76.625	12.4453	0.00178879	0.0484939
ctg2-15423450-15423871	BosL1A3	-	3	85.0606	89.6401	79.6143	10.0258	0.00015926	0.0223249
ctg2-15656244-15656782	BosL1B	+	3	91.4966	96.3031	85.5808	10.7224	0.000210536	0.0245301
ctg2-16176639-16177089	BosL1B	+	5	86.4646	91.396	80.7746	10.6214	5.9973e-05	0.0184022
ctg2-17608137-17608378	BosBovB	+	9	80.2923	93.4231	64.2359	29.1872	1.09926e-05	0.0145334
ctg2-18350253-18350487	BosL1B	-	7	83.4871	95.1063	68.5871	26.5191	0.000732573	0.0355256
ctg2-20004698-20005988	BosBovB	-	4	82.5726	88.3312	75.2717	13.0596	0.00103778	0.0393834
ctg2-21463947-21464083	BosBovB	-	10	82.7382	89.8166	73.9386	15.878	0.00038477	0.028234
ctg2-21781681-21782226	BosBovB	-	5	79.2616	73.1455	86.7483	-13.6029	0.00178879	0.0484939
ctg2-22776144-22776291	BosL1A6	-	4	93.132	97.7794	87.6814	10.0979	7.30651e-05	0.0192534
ctg2-23330580-23330870	BosL1B	+	4	78.3586	90.4623	64.4315	26.0308	0.00124915	0.0422702
ctg2-24044604-24044950	BosBovB	+	4	91.8897	97.0928	86.074	11.0188	0.000375247	0.028234
ctg2-25463596-25464507	BosL1B	+	3	90.2883	94.7678	84.7575	10.0104	0.000676282	0.0344551
ctg2-27913767-27913851	BosBovB	-	4	88.6729	97.0367	78.2389	18.7979	0.000279537	0.0262875
ctg2-29093019-29093768	BosBovB	-	7	66.7598	73.1974	59.3427	13.8547	0.000858483	0.0368467
ctg2-30585557-30585829	BosBovB	+	5	80.0262	85.1556	73.6831	11.4725	0.00149782	0.0450387
ctg2-31511837-31512479	BosBovB	+	3	81.3971	74.674	89.6718	-14.9978	0.000311152	0.0262875
ctg2-32068686-32069797	BosL1A3	+	4	62.005	68.0727	54.5062	13.5665	0.000707298	0.0344551
ctg2-32355582-32358812	BosBovB	-	20	73.7229	67.2704	81.3261	-14.0557	0.00149782	0.0450387
ctg2-32414394-32414872	BosBovB	-	5	73.9561	80.892	65.1976	15.6943	0.000250236	0.0249233
ctg2-32773853-32774783	BosBovB	-	8	72.1203	67.1242	78.3143	-11.1901	0.00124915	0.0422702
ctg2-33868639-33868876	BosBovB	-	3	71.733	84.5029	58.3758	26.1272	0.00126597	0.0424657
ctg2-34934221-34934721	BosBovB	+	5	81.1605	85.7924	75.5848	10.2075	0.000200254	0.0236464
ctg2-35705580-35705663	BosBovB	-	4	84.0558	95.2967	71.0856	24.2111	0.000881591	0.0378299
ctg2-36612799-36613959	BosBovB	+	13	89.9616	95.3098	83.3345	11.9753	0.00038477	0.028234
ctg2-36623680-36623965	BosBovB	-	7	83.4081	91.7295	73.0005	18.729	0.00015926	0.0223249
ctg2-37345969-37346496	BosBovB	+	8	89.4412	96.7578	80.4361	16.3218	0.000250089	0.0249233
ctg2-40823653-40826395	BosL1A4	-	9	73.3332	80.1277	64.9973	15.1304	0.000580014	0.032187
ctg2-40990646-40995731	BosL1B	+	8	70.0457	74.8104	64.3079	10.5026	0.00103778	0.0393834
ctg2-42960674-42960799	BosBovB	-	4	79.6458	84.551	73.7138	10.8372	0.00178879	0.0484939
ctg2-44266220-44266715	BosBovB	-	10	65.2601	58.5003	73.6976	-15.1973	0.00015926	0.0223249
ctg2-47519715-47520736	BosL1A6	+	4	84.7859	94.1503	73.4663	20.6839	0.000148393	0.0223249
ctg2-47555868-47556329	BosBovB	+	7	71.5706	65.2134	79.4139	-14.2005	4.09643e-06	0.0139836
ctg2-53315271-53315829	BosBovB	-	3	92.0522	97.0582	85.7585	11.2996	0.000768568	0.0368467
ctg2-53315834-53316006	BosBovB	+	4	89.1722	96.6745	80.2058	16.4687	0.000412587	0.0301142
ctg2-53839067-53840033	BosBovB	+	3	84.6519	93.0687	74.6308	18.438	0.00149782	0.0450387
ctg2-53902247-53904445	BosL1A6	-	5	82.4526	88.8443	74.9624	13.8818	9.90217e-05	0.0201357
ctg2-53904722-53907232	BosL1A3	-	6	84.4897	89.5633	78.466	11.0973	5.9973e-05	0.0184022
ctg2-53908140-53908975	BosL1A3	-	7	81.129	88.7918	71.1698	17.622	0.000473624	0.0303043
ctg2-54006899-54007102	BosBovB	-	4	77.4186	84.8993	68.3105	16.5888	0.000250236	0.0249233
ctg2-54033523-54034431	BosBovB	+	8	83.3635	89.4365	76.1424	13.2941	5.74679e-06	0.0139836
ctg2-54074872-54077008	BosBovB	-	10	79.9094	85.5214	73.9246	11.5968	4.62101e-05	0.017501
ctg2-54202486-54203386	BosBovB	-	3	81.0924	87.4103	73.2381	14.1721	2.67594e-05	0.0161846
ctg2-54390682-54391787	BosBovB	-	6	62.6003	74.6848	47.9096	26.7752	0.000580014	0.032187
ctg2-55512229-55514196	BosBovB	+	5	70.1068	75.3051	63.5489	11.7562	0.00038477	0.028234
ctg2-56443335-56443866	BosBovB	-	6	66.1059	73.247	56.9642	16.2828	0.00178879	0.0484939
ctg2-56631449-56632900	BosBovB	-	3	77.5347	82.4022	71.7282	10.6739	0.00149782	0.0450387
ctg2-57390265-57390593	BosL1A3	-	3	62.3328	69.1461	54.2157	14.9304	0.000580014	0.032187
ctg2-57707507-57707944	BosBovB	-	3	68.2609	79.0198	55.0192	24.0006	0.00149782	0.0450387
ctg2-59480572-59481892	BosBovB	-	5	84.1628	89.216	78.024	11.192	0.00149782	0.0450387
ctg2-60851499-60852124	BosBovB	+	5	86.7227	92.2298	80.6349	11.5948	0.00126071	0.0424657
ctg2-61403381-61403558	BosL1B	+	3	82.9011	97.051	65.4859	31.5651	0.00124926	0.0422702
ctg2-62237655-62237932	BosBovB	-	8	77.2348	88.3971	64.3553	24.0418	0.000473624	0.0303043
ctg2-62353323-62354194	BosL1A4	+	5	77.5279	82.5065	71.4877	11.0188	0.00124915	0.0422702
ctg2-63009785-63010560	BosL1B	+	5	86.8179	94.8211	76.8678	17.9533	0.00147414	0.0450387
ctg2-63935462-63935716	BosBovB	-	3	82.4801	93.0174	69.8205	23.1968	9.90217e-05	0.0201357
ctg2-65478771-65478870	BosBovB	-	3	24.392	6.90729	45.9115	-39.0042	0.000349194	0.028234
ctg2-65669566-65670075	BosL1A8	+	5	83.5822	88.2991	78.0753	10.2237	0.000580014	0.032187
ctg2-65702018-65702436	BosBovB	-	3	70.2225	76.9509	62.4115	14.5394	0.00092863	0.0393834
ctg2-65899081-65900613	BosBovB	-	12	76.6431	81.5982	71.0115	10.5868	0.0013664	0.0450387
ctg2-65900874-65904896	BosL1A3	-	12	71.8458	76.7613	65.6583	11.103	0.000473624	0.0303043
ctg2-68831607-68832918	BosBovB	-	7	66.8981	72.914	59.451	13.463	1.49417e-05	0.014777
ctg2-69283807-69284233	BosBovB	-	5	75.7652	84.1086	65.6915	18.4171	0.000575562	0.032187
ctg2-69438340-69438482	BosL1A5	+	3	71.5214	81.8113	57.5131	24.2981	0.00101178	0.0393834
ctg2-70204556-70205201	BosBovB	+	3	56.9149	62.3563	49.6597	12.6965	0.00015926	0.0223249
ctg2-70780535-70781873	BosBovB	-	7	86.497	91.8955	80.5431	11.3523	0.000858483	0.0368467
ctg2-70809110-70809751	BosBovB	+	5	79.0604	86.1664	70.4785	15.6879	1.32618e-06	0.0126103
ctg2-70830007-70830835	BosBovB	+	11	85.7211	90.7672	80.1337	10.6334	0.00038477	0.028234
ctg2-71001458-71001988	BosBovB	+	3	83.1069	90.6408	73.866	16.7748	0.00184607	0.0497498
ctg2-74545552-74548026	BosBovB	+	3	75.1471	80.4643	69.3469	11.1175	0.000707298	0.0344551
ctg2-74755840-74756893	BosBovB	-	5	74.4932	79.194	69.0077	10.1862	7.21215e-05	0.0192534
ctg2-74770227-74771264	BosBovB	+	4	74.5254	79.0226	68.8287	10.1939	0.000580014	0.032187
ctg2-74836360-74836432	BosBovB	-	4	83.461	93.1887	71.6519	21.5368	0.000350963	0.028234
ctg2-74907126-74907755	BosL1A6	+	4	75.8063	80.3927	70.1813	10.2114	0.00103778	0.0393834
ctg2-75714819-75715570	BosBovB	+	5	77.1663	83.2659	70.3703	12.8956	4.62101e-05	0.017501
ctg2-76293190-76293508	BosBovB	+	4	78.1595	83.7013	71.2661	12.4353	0.00149782	0.0450387
ctg2-76344619-76344804	BosL1A5	-	4	70.5747	77.1098	62.1854	14.9244	0.000669587	0.0344551
ctg2-76355309-76356272	BosBovB	+	4	62.5746	69.2637	54.0023	15.2614	0.00124915	0.0422702
ctg2-76655157-76655741	BosL1B	-	3	56.7402	50.5375	64.3744	-13.8369	0.000250236	0.0249233
ctg2-77329768-77330247	BosBovB	-	3	60.3995	64.9535	54.8302	10.1232	0.000580014	0.032187
ctg2-77484359-77486496	BosBovB	+	7	66.8147	71.3606	61.2806	10.08	0.000126017	0.0210476
ctg2-77599560-77600416	BosL1A6	+	3	61.7714	68.1562	53.3492	14.8071	0.00103778	0.0393834
ctg2-78210393-78211917	BosBovB	+	4	69.9137	75.0094	63.4284	11.581	0.000381556	0.028234
ctg2-79289661-79290307	BosBovB	+	5	80.7586	85.6094	75.0621	10.5473	0.00124915	0.0422702
ctg2-79363992-79364757	BosBovB	+	11	81.6198	86.2058	76.0223	10.1836	0.000473624	0.0303043
ctg2-80084237-80084304	BosBovB	+	4	73.4332	67.7266	80.4567	-12.7302	0.000473624	0.0303043
ctg2-81376830-81377959	BosBovB	+	6	74.3051	79.2836	69.1399	10.1437	0.00149782	0.0450387
ctg2-81400873-81401300	BosBovB	-	4	67.0858	75.2134	58.0941	17.1193	0.000580014	0.032187
ctg2-82296368-82297473	BosL1B	-	4	54.26	63.8742	42.2439	21.6303	0.000200254	0.0236464
ctg2-83302243-83302688	BosBovB	-	6	73.9127	83.8868	60.8861	23.0007	0.000126017	0.0210476
ctg2-85034723-85035238	BosBovB	-	4	75.603	81.5969	68.226	13.3709	0.00124915	0.0422702
ctg2-85353098-85354129	BosBovB	-	4	88.0175	92.9068	82.2179	10.6889	0.000580014	0.032187
ctg2-85867620-85868039	BosBovB	+	4	85.9043	95.5774	74.0971	21.4803	0.00105618	0.0400533
ctg2-85984934-85985137	BosBovB	+	10	90.5546	95.3144	84.5738	10.7406	0.000126017	0.0210476
ctg2-86484928-86484964	BosBovB	-	3	84.681	96.3063	70.3731	25.9332	7.16786e-05	0.0192534
ctg2-86987445-86988631	BosL1A6	+	5	61.3393	66.0286	55.3254	10.7032	0.00178879	0.0484939
ctg2-87417318-87417415	BosBovB	+	4	86.989	91.4694	81.4391	10.0303	0.000707298	0.0344551
ctg2-89156303-89156871	BosBovB	-	6	67.9134	59.8694	77.5339	-17.6645	2.00696e-05	0.0154155
ctg2-89214434-89214522	BosBovB	+	4	28.0179	15.7156	43.6808	-27.9651	4.62101e-05	0.017501
ctg2-89692898-89693680	BosL1B	-	4	75.2995	80.3937	69.1716	11.2221	0.000858483	0.0368467
ctg2-89694498-89694703	BosL1B	-	3	56.7808	48.0991	66.9718	-18.8727	0.00149782	0.0450387
ctg2-90547239-90548263	BosBovB	-	8	80.3507	86.6145	72.5619	14.0526	0.00103778	0.0393834
ctg2-92026748-92027873	BosBovB	-	5	73.6514	79.7294	66.1708	13.5586	0.00149782	0.0450387
ctg2-92074071-92074369	BosL1B	+	3	53.6014	43.9838	64.9846	-21.0008	0.00178879	0.0484939
ctg2-94689923-94690365	BosL1B	+	4	82.997	87.6891	77.0734	10.6156	0.00103778	0.0393834
ctg2-96441373-96441459	BosBovB	-	4	86.581	94.8664	76.3837	18.4828	0.000123526	0.0210476
ctg2-96796558-96796753	BosBovB	+	7	81.8509	87.8752	74.7079	13.1673	0.00124915	0.0422702
ctg2-98138293-98138406	BosBovB	+	4	79.1081	87.7164	68.2628	19.4536	0.000311152	0.0262875
ctg2-98677920-98678235	BosBovB	-	3	57.0191	65.2674	48.6543	16.6132	0.000707298	0.0344551
ctg2-104337056-104337787	BosBovB	+	5	75.8299	81.801	68.6619	13.1391	0.00178879	0.0484939
ctg2-106336619-106337043	BosBovB	-	6	69.166	62.7891	77.1681	-14.379	0.00103778	0.0393834
ctg2-106418501-106418746	BosBovB	-	7	55.6377	49.2277	63.5269	-14.2992	4.09643e-06	0.0139836
ctg2-106725757-106729107	BosL1A6	-	11	85.2809	91.9081	77.0611	14.847	5.9973e-05	0.0184022
ctg2-109433902-109434835	BosBovB	-	5	55.8245	50.11	62.8577	-12.7477	8.66152e-05	0.0201357
ctg2-110581529-110581661	BosL1A8	-	3	78.42	91.8584	62.1509	29.7076	0.00156854	0.0470188
ctg2-110835993-110836185	BosBovB	-	4	30.014	16.9846	45.3885	-28.4038	0.000200254	0.0236464
ctg2-111040729-111041327	BosL1B	-	5	76.4061	83.29	67.781	15.509	0.000858483	0.0368467
ctg2-111979088-111979311	BosBovB	-	4	45.1707	33.8929	58.7792	-24.8862	0.00149782	0.0450387
ctg2-112473177-112473528	BosL1B	+	3	88.8741	83.1131	94.3692	-11.2561	0.000733065	0.0355449
ctg2-112628511-112628908	BosL1B	+	6	85.8055	97.5312	71.4968	26.0345	1.88779e-05	0.0154155
ctg2-112836050-112836546	BosBovB	-	3	73.3357	83.3262	60.7936	22.5326	0.000624034	0.0343867
ctg2-112953609-112953706	BosBovB	-	3	74.7885	69.2469	81.609	-12.3621	0.000858483	0.0368467
ctg2-113235695-113236703	BosBovB	+	9	77.5102	82.3459	71.8843	10.4616	0.00178879	0.0484939
ctg2-113277943-113278233	BosBovB	+	3	84.7339	89.3281	79.0795	10.2486	0.000311152	0.0262875
ctg2-113813598-113813669	BosBovB	-	4	71.9135	78.9949	62.4568	16.5381	0.000858483	0.0368467
ctg2-114725286-114725521	BosBovB	+	7	77.0496	85.3237	66.8878	18.4359	0.00015926	0.0223249
ctg2-114934921-114935324	BosBovB	+	4	75.9231	82.3456	68.1596	14.186	0.000450363	0.0303043
ctg2-115385450-115385550	BosBovB	-	5	89.7932	94.4876	83.7373	10.7503	0.00126071	0.0424657
ctg2-115567896-115568553	BosBovB	-	9	63.0044	57.6565	69.7681	-12.1116	0.000858483	0.0368467
ctg2-116113082-116115041	BosBovB	+	6	73.6102	79.0035	66.5323	12.4713	0.00038477	0.028234
ctg2-116650878-116651416	BosL1A3	+	9	80.9987	86.2041	74.7477	11.4564	0.000126017	0.0210476
ctg2-116651461-116656988	BosL1A3	+	17	69.7967	74.5216	64.1247	10.397	0.000250236	0.0249233
ctg2-117123320-117124084	BosL1A6	-	5	65.1028	72.4855	55.6178	16.8678	0.000250236	0.0249233
ctg2-117343457-117343985	BosBovB	+	8	80.1636	85.0588	74.4803	10.5785	0.00103778	0.0393834
ctg2-117480204-117480480	BosBovB	+	3	70.1469	77.6854	60.5734	17.112	0.000623067	0.0343867
ctg2-118823003-118823045	BosBovB	-	3	76.3985	89.4539	61.0218	28.4321	0.000580014	0.032187
ctg2-119072484-119072591	BosBovB	-	3	82.1678	94.8448	66.5654	28.2794	0.0009165	0.0392742
ctg2-119756656-119757167	BosBovB	-	3	87.6063	93.5146	80.3346	13.18	0.00103778	0.0393834
ctg2-120329892-120330373	BosBovB	-	3	83.0011	89.8958	74.5154	15.3804	0.000311152	0.0262875
ctg2-120492325-120492835	BosBovB	+	5	62.7152	67.2825	57.0074	10.2751	0.00124915	0.0422702
ctg2-120597346-120597392	BosBovB	+	3	90.007	95.7281	82.8204	12.9077	0.00108524	0.0407167
ctg2-120792241-120792350	BosL1A6	-	3	68.8224	76.1167	59.8449	16.2718	5.9973e-05	0.0184022
ctg2-121736301-121736542	BosL1B	+	16	69.3039	63.7695	75.9535	-12.184	0.00038477	0.028234
ctg2-121779167-121779366	BosL1B	-	3	90.7632	96.3521	83.8846	12.4675	0.000566585	0.032187
ctg2-122305736-122306383	BosBovB	+	5	92.0676	97.1925	85.76	11.4325	0.00108369	0.0407167
ctg2-122542009-122542842	BosBovB	+	6	78.9716	85.9344	70.3716	15.5628	0.00178879	0.0484939
ctg2-122657959-122658537	BosBovB	-	9	84.1063	90.0825	76.5244	13.5582	0.00178879	0.0484939
ctg2-123149317-123151186	BosBovB	+	6	69.774	74.5495	63.804	10.7455	0.000707298	0.0344551
ctg2-124664319-124664997	BosBovB	+	5	84.3338	89.8363	77.5615	12.2747	3.52765e-05	0.0168683
ctg2-124967909-124968436	BosBovB	-	3	92.4058	97.781	84.8212	12.9598	0.000804228	0.0368467
ctg2-125042416-125042579	BosBovB	+	4	51.873	59.1542	43.0827	16.0715	0.000580014	0.032187
ctg2-125221963-125222177	BosBovB	+	6	88.1767	95.4375	79.8611	15.5764	0.00024877	0.0249233
ctg2-125229634-125230165	BosBovB	+	7	85.3754	91.7421	77.5196	14.2225	0.00149782	0.0450387
ctg2-125433456-125433598	BosL1A6	-	4	83.2623	88.9166	76.413	12.5036	0.00171346	0.0484939
ctg2-126179555-126180060	BosBovB	+	5	77.1709	71.5686	84.1555	-12.5869	0.00038477	0.028234
ctg2-126753474-126753867	BosL1A5	-	3	48.7029	43.636	55.0179	-11.3819	0.00158966	0.0475045
ctg2-127633676-127633776	BosBovB	+	7	77.6866	92.2341	59.6708	32.5633	9.90217e-05	0.0201357
ctg2-127696585-127696893	BosL1A6	+	6	87.768	92.6803	82.3128	10.3676	0.00125966	0.0424657
ctg2-128226232-128226413	BosBovB	+	11	90.634	97.074	82.9241	14.1499	0.000126017	0.0210476
ctg2-128348882-128349629	BosL1A6	+	8	63.0766	58.2481	69.0379	-10.7898	0.00178879	0.0484939
ctg2-128882475-128883284	BosBovB	+	10	84.532	89.5534	78.3216	11.2317	0.00178879	0.0484939
ctg2-128941295-128941455	BosBovB	+	10	72.7478	87.4163	54.3858	33.0305	0.00178879	0.0484939
ctg2-129223354-129223599	BosBovB	-	6	73.2013	81.9747	62.1893	19.7854	1.49417e-05	0.014777
ctg2-130581987-130582420	BosBovB	+	15	76.9051	82.6768	69.6433	13.0335	0.00015926	0.0223249
ctg2-130789236-130789412	BosBovB	+	5	86.6855	94.3063	77.3062	17.0001	0.000858483	0.0368467
ctg2-130848610-130849915	BosBovB	-	7	85.9843	91.4118	79.6099	11.8019	0.00103778	0.0393834
ctg2-130991237-130991651	BosBovB	-	6	64.188	71.5309	55.4391	16.0918	7.73607e-05	0.0192534
ctg2-131270231-131271124	BosBovB	-	7	51.1907	43.3867	60.6094	-17.2227	0.000311152	0.0262875
ctg2-131526180-131526885	BosL1B	-	3	87.5828	95.8844	77.3654	18.519	0.000676282	0.0344551
ctg2-133620643-133620723	BosBovB	-	4	84.7389	93.1806	74.8596	18.321	0.000473624	0.0303043
ctg2-134968731-134969182	BosBovB	-	9	61.2664	56.223	67.4692	-11.2462	0.00103778	0.0393834
ctg2-135149569-135149754	BosL1B	+	3	17.7232	4.07708	36.0762	-31.9992	0.000140904	0.0223249
ctg2-135150317-135150479	BosBovB	+	8	76.9159	87.1999	64.5312	22.6686	0.000858483	0.0368467
ctg2-135196232-135196538	BosBovB	-	10	42.3191	29.0021	58.3862	-29.3841	4.62101e-05	0.017501
ctg2-135291756-135292414	BosL1A6	-	27	62.6744	55.1251	72.0295	-16.9044	2.67594e-05	0.0161846
ctg2-135295574-135296579	BosL1A6	-	11	50.727	41.5795	62.014	-20.4344	0.000200254	0.0236464
ctg2-135326703-135326822	BosL1B	-	4	23.1928	12.1216	35.5986	-23.4769	0.00068698	0.0344551
ctg2-135538129-135538514	BosL1B	-	4	83.7162	92.4341	73.6462	18.7879	0.00178879	0.0484939
ctg2-135539451-135539839	BosBovB	+	6	88.4581	96.892	78.2756	18.6164	0.000676282	0.0344551
ctg2-135715225-135715871	BosBovB	+	7	86.9643	91.9512	80.9247	11.0265	0.000580014	0.032187
ctg2-135886619-135887205	BosBovB	+	10	80.5574	85.8836	74.05	11.8336	5.9973e-05	0.0184022
ctg3-52638-55349	BosL1A6	-	7	73.0208	80.3996	63.568	16.8316	9.90217e-05	0.0201357
ctg3-340218-341214	BosBovB	-	7	83.1369	90.9919	72.9567	18.0352	7.73607e-05	0.0192534
ctg3-707133-707632	BosL1A5	+	3	87.6385	94.226	79.5308	14.6953	0.000858483	0.0368467
ctg3-1104421-1104809	BosBovB	+	4	64.0972	54.3404	75.7367	-21.3963	0.000473624	0.0303043
ctg3-1144842-1145429	BosBovB	+	7	69.772	75.6446	62.7487	12.8959	0.000707298	0.0344551
ctg3-1547101-1548137	BosL1B	+	4	79.1753	86.7041	69.0886	17.6155	2.00696e-05	0.0154155
ctg3-3020993-3021283	BosL1B	-	3	69.8525	62.8902	78.7466	-15.8564	0.000473624	0.0303043
ctg3-3907213-3907721	BosBovB	+	14	78.1047	83.8379	71.65	12.188	0.00124915	0.0422702
ctg3-5608282-5609101	BosBovB	-	9	79.8879	87.9401	69.9781	17.962	0.000200254	0.0236464
ctg3-5726615-5727110	BosBovB	+	4	68.8502	74.0195	62.2241	11.7954	0.000858483	0.0368467
ctg3-5863302-5863759	BosBovB	+	3	75.6774	82.5527	67.6859	14.8668	0.00015926	0.0223249
ctg3-6236298-6238437	BosL1A8	-	3	71.6488	77.5682	64.1889	13.3793	0.00123425	0.0422702
ctg3-6245025-6245551	BosL1A3	+	5	81.596	87.0586	74.5903	12.4683	0.000200254	0.0236464
ctg3-6246805-6252917	BosL1A3	+	22	77.6698	83.0863	70.7521	12.3342	7.73607e-05	0.0192534
ctg3-7264235-7265198	BosBovB	-	8	85.7469	94.9065	74.577	20.3295	0.000707298	0.0344551
ctg3-7704461-7704710	BosBovB	+	3	83.9947	91.3146	75.2386	16.076	0.00125966	0.0424657
ctg3-7784901-7785473	BosL1B	+	3	32.5186	18.1442	49.8628	-31.7187	0.000707298	0.0344551
ctg3-7810417-7811105	BosL1B	+	4	49.223	39.0978	61.2433	-22.1455	0.000473624	0.0303043
ctg3-8318020-8318187	BosBovB	+	3	90.5063	96.4031	83.2487	13.1544	0.00092863	0.0393834
ctg3-8377965-8378202	BosBovB	-	7	83.0281	89.0862	75.572	13.5142	0.00149782	0.0450387
ctg3-8766876-8767077	BosL1A8	-	5	90.8487	96.6378	83.8546	12.7832	0.0014366	0.0450387
ctg3-8791229-8793096	BosBovB	-	6	89.0672	93.9469	82.9092	11.0377	0.000858483	0.0368467
ctg3-8865424-8866608	BosBovB	-	7	75.6364	80.1271	70.0263	10.1008	0.000707298	0.0344551
ctg3-8867972-8869001	BosBovB	-	3	84.208	93.8266	72.4795	21.3471	0.000789641	0.0368467
ctg3-8886382-8887028	BosBovB	-	7	74.89	80.1636	68.544	11.6195	0.00124915	0.0422702
ctg3-8933211-8933725	BosL1A3	+	5	93.4646	98.0722	87.7352	10.337	0.0014543	0.0450387
ctg3-8936332-8939196	BosL1A6	+	7	89.8672	95.019	83.5247	11.4943	0.000707298	0.0344551
ctg3-8939197-8939634	BosBovB	-	5	89.0851	95.5826	81.3385	14.2441	0.000580014	0.032187
ctg3-9025643-9026174	BosBovB	+	8	90.7943	95.5405	85.0193	10.5212	1.49417e-05	0.014777
ctg3-9026831-9027573	BosL1B	+	3	90.2764	95.4052	83.9641	11.4411	0.000858436	0.0368467
ctg3-9048731-9049376	BosL1A6	+	3	85.9203	90.483	80.2773	10.2058	0.00178879	0.0484939
ctg3-9063429-9065153	BosL1B	-	5	85.2119	91.2048	77.5821	13.6227	0.00149782	0.0450387
ctg3-9065427-9067396	BosL1B	-	12	82.8981	88.8698	75.4936	13.3762	0.000200254	0.0236464
ctg3-9211807-9212590	BosBovB	+	7	87.6538	92.626	81.6692	10.9568	0.00103778	0.0393834
ctg3-9257054-9258002	BosBovB	-	5	86.0884	92.0794	78.6233	13.4561	0.00171346	0.0484939
ctg3-9297699-9298341	BosL1B	+	4	82.2949	88.2186	75.1683	13.0503	0.000296533	0.0262875
ctg3-10011191-10011478	BosBovB	-	4	87.048	93.2505	79.7429	13.5076	0.000103831	0.020933
ctg3-10322747-10323548	BosL1A3	-	12	59.827	64.6672	54.0955	10.5718	0.00147414	0.0450387
ctg3-10456863-10457227	BosL1A6	+	4	75.6349	81.3383	68.6143	12.724	0.000473624	0.0303043
ctg3-10829884-10830265	BosL1A8	+	3	77.9582	84.7022	70.035	14.6673	0.000473624	0.0303043
ctg3-11161540-11164005	BosL1A6	+	6	74.0651	81.4309	65.6575	15.7734	2.67594e-05	0.0161846
ctg3-11338667-11339504	BosBovB	-	4	80.0629	85.3317	73.6952	11.6365	0.00178879	0.0484939
ctg3-11509309-11509910	BosL1B	+	3	84.9862	90.9179	77.3861	13.5318	0.00147414	0.0450387
ctg3-11516567-11519190	BosBovB	+	7	79.4678	85.2129	72.798	12.415	3.52765e-05	0.0168683
ctg3-11997752-11998217	BosBovB	-	6	72.356	77.8209	65.4309	12.3901	0.00124915	0.0422702
ctg3-12417593-12417924	BosL1B	-	4	31.1614	18.7228	46.3503	-27.6276	0.00184607	0.0497498
ctg3-12580402-12583443	BosL1A6	-	7	74.2112	81.6439	64.8895	16.7544	3.52765e-05	0.0168683
ctg3-12775109-12776652	BosBovB	+	12	87.5738	92.3212	81.651	10.6702	0.000200254	0.0236464
ctg3-13222928-13223142	BosL1A3	-	4	79.4973	85.7398	71.7401	13.9997	0.00149782	0.0450387
ctg3-13328880-13329139	BosBovB	+	4	86.372	92.2973	79.3547	12.9426	0.000556538	0.032187
ctg3-13336321-13338701	BosL1B	-	4	69.7203	76.2695	61.6596	14.6099	0.00149782	0.0450387
ctg3-13735918-13737274	BosBovB	-	4	89.2389	96.9423	79.6543	17.288	9.98081e-05	0.0202847
ctg3-14562927-14563528	BosL1B	-	18	75.1117	69.7133	81.7251	-12.0118	4.62101e-05	0.017501
ctg3-15753764-15754339	BosL1B	-	3	30.2856	20.2802	42.6	-22.3198	0.000580014	0.032187
ctg3-17093668-17093782	BosBovB	-	3	87.4724	97.4969	75.1346	22.3623	3.36618e-05	0.0168683
ctg3-17097795-17098615	BosBovB	+	3	78.119	85.5938	68.9192	16.6745	0.000126017	0.0210476
ctg3-17688246-17688951	BosL1B	+	3	67.7687	76.5404	56.915	19.6255	0.000580014	0.032187
ctg3-17736609-17739876	BosBovB	-	5	59.9146	65.8732	52.7657	13.1074	0.000250236	0.0249233
ctg3-20836111-20836365	BosBovB	-	5	87.1845	93.2527	80.8048	12.448	0.00178879	0.0484939
ctg3-20897801-20897944	BosBovB	-	10	58.5391	69.8325	44.6396	25.1929	0.00038477	0.028234
ctg3-21447251-21447531	BosBovB	+	8	79.3671	85.1861	72.324	12.8621	0.000473624	0.0303043
ctg3-21535202-21535919	BosBovB	-	9	75.9961	71.3541	81.6902	-10.3361	0.00015926	0.0223249
ctg3-24148081-24148398	BosL1B	-	5	81.8813	88.0366	75.1509	12.8857	0.000473624	0.0303043
ctg3-24405885-24406316	BosL1B	-	4	71.9839	77.8929	64.5999	13.293	0.000580014	0.032187
ctg3-24496493-24497295	BosBovB	-	3	60.4018	69.8501	49.4705	20.3796	0.000473624	0.0303043
ctg3-24775647-24776162	BosBovB	-	6	78.5016	83.4147	72.5748	10.8399	0.000707298	0.0344551
ctg3-25175374-25175889	BosBovB	-	3	61.054	68.1104	52.3692	15.7412	0.000200254	0.0236464
ctg3-25687773-25688970	BosBovB	-	13	87.1784	93.5238	79.8228	13.701	5.9973e-05	0.0184022
ctg3-25739762-25739912	BosBovB	+	4	90.5938	95.6197	84.5356	11.0841	0.00171346	0.0484939
ctg3-25940527-25941106	BosBovB	+	4	85.6797	91.1618	78.8719	12.2898	5.9973e-05	0.0184022
ctg3-26760575-26761849	BosBovB	-	6	64.2807	56.5463	74.1089	-17.5627	0.00117239	0.0422702
ctg3-27217922-27220175	BosL1B	-	5	84.6946	89.3678	78.8433	10.5245	0.00124915	0.0422702
ctg3-28060552-28060878	BosL1B	-	3	76.7232	84.0174	67.7859	16.2315	0.000858483	0.0368467
ctg3-28060555-28060989	BosL1A5	-	3	76.7232	84.0174	67.7859	16.2315	0.000858483	0.0368467
ctg3-28928566-28929416	BosBovB	-	8	89.9076	96.6935	81.6627	15.0308	0.000250236	0.0249233
ctg3-29531382-29532632	BosL1B	+	6	87.5485	92.512	80.9985	11.5135	0.00149782	0.0450387
ctg3-29551746-29552121	BosBovB	+	9	92.6111	97.8466	86.1459	11.7007	0.000126017	0.0210476
ctg3-31085617-31086376	BosBovB	-	4	76.1441	80.7319	70.3337	10.3981	0.00103778	0.0393834
ctg3-31677730-31678165	BosBovB	-	7	78.4897	73.6768	84.4287	-10.7519	0.000473624	0.0303043
ctg3-32381286-32383854	BosL1A3	+	6	81.1427	86.6856	74.2922	12.3934	5.9973e-05	0.0184022
ctg3-32383855-32384831	BosL1A6	+	3	78.8119	83.5281	72.8187	10.7094	0.00100411	0.0393834
ctg3-32470776-32472047	BosBovB	-	7	83.063	88.1906	76.8367	11.3538	0.00124915	0.0422702
ctg3-32572366-32574647	BosBovB	-	11	83.6889	88.6645	77.8765	10.788	0.000200254	0.0236464
ctg3-32574641-32577722	BosL1A6	-	10	84.1531	88.8733	78.7218	10.1514	0.00149782	0.0450387
ctg3-32604248-32604357	BosBovB	-	7	76.7328	87.75	63.4357	24.3143	0.000580014	0.032187
ctg3-32611505-32614310	BosBovB	-	9	85.2378	90.9875	78.7238	12.2637	0.000126017	0.0210476
ctg3-32743752-32743973	BosBovB	+	5	64.9072	56.6111	75.7264	-19.1153	0.000311152	0.0262875
ctg3-32800420-32800885	BosBovB	+	3	83.4753	89.3094	76.2899	13.0195	0.000450363	0.0303043
ctg3-33530260-33530745	BosBovB	+	9	87.1664	93.9379	78.9567	14.9812	0.000311152	0.0262875
ctg3-33632055-33632321	BosL1A3	-	7	77.2118	87.4737	64.392	23.0816	0.00124915	0.0422702
ctg3-34406803-34407759	BosBovB	-	16	80.2371	85.4306	73.8664	11.5642	0.000200254	0.0236464
ctg3-35277943-35278610	BosBovB	-	4	81.0478	87.1829	74.4616	12.7212	0.00125896	0.0424657
ctg3-37342938-37344787	BosBovB	+	8	75.5867	81.2989	69.0056	12.2933	0.00124915	0.0422702
ctg3-38863968-38864533	BosBovB	+	4	55.1114	64.7562	42.979	21.7772	0.000311152	0.0262875
ctg3-38913001-38913240	BosBovB	+	6	82.4225	88.2717	74.9561	13.3156	0.000858483	0.0368467
ctg3-38986113-38987414	BosBovB	-	7	72.5271	80.2753	63.1423	17.133	0.000473624	0.0303043
ctg3-38997127-38998227	BosBovB	-	7	70.7589	75.7811	64.7586	11.0225	0.00178879	0.0484939
ctg3-39055001-39056697	BosBovB	-	5	67.8073	73.0169	61.3509	11.666	0.00038477	0.028234
ctg3-39563282-39563601	BosBovB	+	8	68.3392	73.1812	61.9409	11.2402	0.00103778	0.0393834
ctg3-40646737-40647825	BosBovB	-	6	74.1654	79.0646	68.2937	10.7709	0.00178879	0.0484939
ctg3-40877454-40878174	BosBovB	-	3	63.2681	68.5167	56.7266	11.7901	0.00126597	0.0424657
ctg3-41188434-41189469	BosL1B	-	5	72.8909	79.3324	64.9665	14.3659	0.00178879	0.0484939
ctg3-41211954-41212846	BosBovB	+	4	67.1938	72.134	61.1962	10.9378	0.00124915	0.0422702
ctg3-41712633-41713638	BosBovB	-	4	67.4762	74.2776	58.9244	15.3532	0.00103778	0.0393834
ctg3-42070012-42071024	BosBovB	+	5	83.2589	87.9393	77.704	10.2353	0.00149782	0.0450387
ctg3-43151180-43151871	BosL1B	-	3	50.2552	39.776	63.1526	-23.3765	0.00108524	0.0407167
ctg3-45136263-45137505	BosL1B	-	3	82.2606	87.3083	75.8203	11.488	0.000858483	0.0368467
ctg3-45196694-45197090	BosL1A8	-	3	80.3852	87.2572	72.3064	14.9508	0.000311152	0.0262875
ctg3-45657598-45657801	BosBovB	-	3	91.3811	96.6784	85.6015	11.0769	0.000668697	0.0344551
ctg3-46197842-46199619	BosBovB	-	9	89.0232	95.5133	80.4675	15.0458	0.000200254	0.0236464
ctg3-46813093-46813533	BosL1A2	+	5	84.9892	91.5703	77.1785	14.3918	5.9973e-05	0.0184022
ctg3-46813379-46814057	BosL1A3	+	3	43.489	48.7626	37.3949	11.3678	0.000707298	0.0344551
ctg3-47554373-47555163	BosBovB	+	10	78.3281	83.3118	72.3373	10.9745	0.000200254	0.0236464
ctg3-47574467-47575299	BosBovB	+	6	79.627	84.9942	72.9115	12.0826	0.00015926	0.0223249
ctg3-47588133-47589838	BosBovB	-	5	72.9471	78.2692	66.3863	11.8829	0.00178879	0.0484939
ctg3-47918499-47920076	BosL1B	+	4	85.244	89.9156	79.4942	10.4214	0.00092863	0.0393834
ctg3-47952145-47952898	BosBovB	-	4	80.691	89.1631	69.7281	19.435	7.73607e-05	0.0192534
ctg3-48754923-48755618	BosBovB	-	5	71.3935	66.3448	77.7962	-11.4514	0.000311152	0.0262875
ctg3-49638301-49639384	BosBovB	+	14	83.4167	88.8637	76.7277	12.136	2.67594e-05	0.0161846
ctg3-50030866-50031625	BosBovB	+	4	88.5488	94.6202	82.2951	12.3251	0.00111787	0.0419245
ctg3-51513467-51513786	BosBovB	-	10	87.5534	93.0871	80.754	12.3331	0.00103778	0.0393834
ctg3-51830655-51831294	BosBovB	-	5	86.5074	93.5275	78.0769	15.4506	0.000200254	0.0236464
ctg3-52141462-52141633	BosL1B	-	3	13.3486	2.08347	26.9333	-24.8499	0.000850082	0.0368467
ctg3-53321796-53322103	BosL1B	+	6	85.6711	92.6161	77.082	15.5342	0.000450363	0.0303043
ctg3-53540540-53541746	BosBovB	-	3	84.2491	93.4145	73.2449	20.1696	0.000348606	0.028234
ctg3-54360701-54361729	BosL1A3	+	20	87.5245	92.6144	81.2224	11.3921	0.000200254	0.0236464
ctg3-55494840-55494948	BosBovB	+	3	74.4702	88.5125	59.596	28.9165	0.00141455	0.0450387
ctg3-57372607-57373664	BosL1A4	+	4	70.5959	65.1937	77.2423	-12.0486	0.000473624	0.0303043
ctg3-59014697-59015173	BosL1B	-	3	16.534	5.68854	30.4499	-24.7614	1.49417e-05	0.014777
ctg3-64047276-64048815	BosL1A6	+	6	67.0172	61.9347	73.5586	-11.6239	0.00015926	0.0223249
ctg3-65562457-65563819	BosBovB	-	4	78.0733	73.7178	83.8781	-10.1604	0.000126017	0.0210476
ctg3-66557190-66559808	BosL1A3	+	18	81.8286	88.6913	73.5956	15.0956	7.73607e-05	0.0192534
ctg3-66996730-66997820	BosBovB	-	6	87.4444	94.5208	78.913	15.6078	0.00124915	0.0422702
ctg3-69729497-69730760	BosBovB	+	5	66.1342	72.1037	58.603	13.5007	1.32618e-06	0.0126103
ctg3-71984140-71985566	BosL1B	+	4	62.9345	68.189	56.5702	11.6188	0.00103778	0.0393834
ctg3-72625662-72626968	BosBovB	-	4	66.635	71.3123	60.674	10.6383	0.00149782	0.0450387
ctg3-73034383-73034529	BosBovB	-	4	59.0444	65.0883	51.6058	13.4825	7.73607e-05	0.0192534
ctg3-73174194-73174365	BosL1A2	+	4	72.1639	84.1725	57.1381	27.0344	1.49417e-05	0.014777
ctg3-74336823-74337830	BosBovB	+	3	77.898	83.2253	71.4722	11.7531	0.00149782	0.0450387
ctg3-74686225-74686821	BosBovB	+	3	76.9149	81.8004	71.06	10.7404	0.00149782	0.0450387
ctg3-75744620-75746440	BosBovB	-	7	68.4941	73.0505	63.0271	10.0234	0.000580014	0.032187
ctg3-76135041-76136052	BosBovB	-	5	82.6649	87.396	76.6303	10.7657	0.00178879	0.0484939
ctg3-77807837-77808111	BosBovB	-	9	85.6172	92.2613	77.801	14.4603	0.000200254	0.0236464
ctg3-78901063-78901514	BosBovB	+	9	75.6709	70.524	82.0056	-11.4816	0.000250236	0.0249233
ctg3-79577253-79580862	BosL1B	+	8	78.3662	83.3069	72.4259	10.881	0.000250236	0.0249233
ctg3-79597478-79598450	BosL1B	-	3	72.0856	79.6375	62.2012	17.4363	4.62101e-05	0.017501
ctg3-79797938-79799258	BosBovB	+	5	79.3671	84.8435	72.6731	12.1704	5.9973e-05	0.0184022
ctg3-80461127-80461984	BosBovB	+	14	91.8164	96.7814	85.8324	10.9489	0.00103778	0.0393834
ctg3-82865027-82865304	BosBovB	+	3	81.3027	86.7662	74.6353	12.131	5.9973e-05	0.0184022
ctg3-83918713-83919499	BosL1A3	+	23	77.9281	90.6318	62.4543	28.1775	0.000707298	0.0344551
ctg3-85437065-85437326	BosBovB	-	8	64.7363	58.6182	71.6325	-13.0142	0.00038477	0.028234
ctg3-86046691-86047023	BosBovB	-	6	38.5698	29.2307	50.1059	-20.8751	0.000707298	0.0344551
ctg3-86256564-86256916	BosL1B	+	4	22.0158	10.2424	35.7404	-25.498	0.000707298	0.0344551
ctg3-87141131-87141370	BosL1B	-	5	84.2824	89.8812	77.3846	12.4966	0.000858483	0.0368467
ctg3-87437290-87437525	BosBovB	+	4	52.2376	45.2017	60.908	-15.7063	2.67594e-05	0.0161846
ctg3-88490747-88491238	BosBovB	+	5	79.3243	84.3837	73.1717	11.2119	3.52765e-05	0.0168683
ctg3-89513372-89514828	BosL1B	+	5	79.3371	84.8544	72.3553	12.4991	0.000200254	0.0236464
ctg3-89614757-89615141	BosL1B	+	4	82.7606	89.1391	74.6704	14.4687	0.000858483	0.0368467
ctg3-89639287-89639462	BosBovB	+	3	76.3443	87.0469	63.1718	23.8751	0.000126017	0.0210476
ctg3-91090825-91091252	BosL1B	+	6	27.6796	15.5797	42.5718	-26.9921	9.90217e-05	0.0201357
ctg3-92345443-92345889	BosBovB	-	9	35.6888	41.5837	28.1774	13.4062	0.000250236	0.0249233
ctg3-93252379-93253794	BosL1A6	+	7	68.7431	73.6461	62.9643	10.6818	0.00149782	0.0450387
ctg3-93292254-93293413	BosL1A2	+	37	87.7647	93.5031	80.8248	12.6783	0.00149782	0.0450387
ctg3-93445076-93445606	BosBovB	-	7	71.8878	80.7474	62.3882	18.3593	5.9973e-05	0.0184022
ctg3-93702842-93703172	BosBovB	+	7	84.6852	91.5111	76.3317	15.1794	0.00178879	0.0484939
ctg3-94225059-94225744	BosBovB	-	4	80.1281	85.4788	73.6574	11.8214	0.00038477	0.028234
ctg3-94428919-94430495	BosBovB	-	5	89.879	94.7419	84.002	10.7399	0.000210536	0.0245301
ctg3-95207650-95208722	BosBovB	-	4	66.3576	75.8211	55.9393	19.8819	0.000200254	0.0236464
ctg3-96250370-96250874	BosBovB	-	5	75.4517	81.4023	69.1523	12.25	1.49417e-05	0.014777
ctg3-96251630-96252107	BosL1A3	+	4	36.4181	43.9026	27.9833	15.9193	0.00103778	0.0393834
ctg3-96405628-96406269	BosBovB	-	4	64.5099	69.5786	58.4149	11.1637	0.00103778	0.0393834
ctg3-96730293-96731393	BosBovB	-	5	66.8582	72.5897	59.3846	13.2051	0.000311152	0.0262875
ctg3-96840973-96846073	BosL1A6	-	9	66.1359	71.1333	60.0568	11.0765	0.00124915	0.0422702
ctg3-97374084-97374794	BosL1A6	+	5	78.1607	83.4627	72.1313	11.3314	0.00149782	0.0450387
ctg3-98239153-98239398	BosL1A2	-	4	76.72	85.469	67.6176	17.8514	0.00015926	0.0223249
ctg3-98664066-98664372	BosBovB	-	5	30.8694	20.2172	43.3934	-23.1761	0.000124242	0.0210476
ctg3-99146148-99147057	BosBovB	+	5	84.3398	89.3645	78.6022	10.7623	0.000707298	0.0344551
ctg3-99255817-99256528	BosL1A6	+	10	67.3305	60.8742	75.0261	-14.1519	0.00015926	0.0223249
ctg3-99393041-99393265	BosBovB	+	3	55.8851	64.2667	45.5692	18.6974	0.000250236	0.0249233
ctg3-100823591-100824099	BosBovB	-	4	54.5197	44.2229	66.7757	-22.5529	0.00124915	0.0422702
ctg3-101408980-101409542	BosL1B	-	6	84.3832	92.9235	73.5735	19.35	7.73607e-05	0.0192534
ctg3-101511048-101511325	BosBovB	-	9	86.7058	91.3508	81.146	10.2048	0.00015926	0.0223249
ctg3-101512039-101513778	BosBovB	+	6	79.641	84.7847	73.2046	11.58	4.62101e-05	0.017501
ctg3-101851822-101853075	BosBovB	+	7	75.4198	80.0691	69.1481	10.921	0.00178879	0.0484939
ctg3-102231272-102231783	BosBovB	-	7	88.7809	94.2153	82.8176	11.3977	0.000126017	0.0210476
ctg3-102255675-102255998	BosBovB	+	8	89.6336	95.6317	83.0942	12.5374	0.000924575	0.0393834
ctg3-104452543-104453147	BosBovB	-	6	49.3175	38.7839	62.2821	-23.4982	2.80844e-05	0.0167972
ctg3-105354556-105354862	BosBovB	-	9	52.657	47.6355	58.7754	-11.1399	0.000473624	0.0303043
ctg3-105523363-105523554	BosBovB	+	5	90.0524	94.8769	84.1146	10.7623	2.85866e-06	0.0138096
ctg3-106083724-106084665	BosBovB	+	5	78.0574	82.7324	72.2961	10.4363	0.00178879	0.0484939
ctg3-106205763-106205877	BosBovB	+	5	73.211	85.8794	57.6192	28.2601	2.67594e-05	0.0161846
ctg3-106258632-106259557	BosBovB	-	5	87.3025	93.9291	80.1017	13.8274	0.00167092	0.0484939
ctg3-107013397-107014326	BosBovB	-	7	85.9712	94.4864	75.8464	18.64	0.000858483	0.0368467
ctg3-108121534-108121796	BosBovB	-	7	72.3979	77.2678	66.1659	11.1019	0.00123425	0.0422702
ctg3-108270713-108270780	BosBovB	+	3	80.2753	86.7458	72.3115	14.4343	0.00103778	0.0393834
ctg3-108275645-108275849	BosL1B	-	3	16.2395	5.08065	29.4986	-24.418	0.00040182	0.0294335
ctg3-108676272-108676915	BosL1B	+	3	84.6493	90.0927	77.8197	12.2731	0.000707298	0.0344551
ctg3-108779366-108779519	BosBovB	+	4	85.3142	89.968	79.5865	10.3814	0.000858483	0.0368467
ctg3-110006795-110007192	BosBovB	-	6	85.7655	95.2817	74.0149	21.2669	0.000126017	0.0210476
ctg3-110013886-110014761	BosBovB	-	5	79.9243	87.375	70.8231	16.5519	1.09926e-05	0.0145334
ctg3-110695507-110695582	BosBovB	+	6	68.1816	79.5417	54.2	25.3417	0.000250236	0.0249233
ctg3-110912968-110913393	BosBovB	-	4	79.2413	84.6688	72.474	12.1947	0.00124915	0.0422702
ctg3-111009737-111009893	BosL1A3	+	4	81.7588	87.1703	76.3205	10.8498	0.0010314	0.0393834
ctg3-111101552-111102421	BosL1A6	-	4	79.6416	86.1872	71.3798	14.8074	8.01604e-06	0.0139836
ctg3-111151476-111151949	BosBovB	-	3	75.277	81.6604	67.4205	14.2399	0.000707298	0.0344551
ctg3-111259591-111261178	BosBovB	-	7	72.7735	79.7953	65.1003	14.695	0.000286255	0.0262875
ctg3-111412031-111414250	BosBovB	-	7	70.6672	78.607	61.1687	17.4383	2.00696e-05	0.0154155
ctg3-111490272-111491871	BosBovB	+	6	68.3072	74.7082	60.3206	14.3876	0.000126017	0.0210476
ctg3-111493016-111493451	BosBovB	-	6	71.5506	78.7583	62.6795	16.0788	8.01604e-06	0.0139836
ctg3-112387861-112387945	BosBovB	+	3	57.0121	68.4083	42.9859	25.4224	0.000200254	0.0236464
ctg3-112787345-112787829	BosL1B	-	9	87.3993	93.0392	80.7558	12.2833	5.9973e-05	0.0184022
ctg3-113938839-113939481	BosBovB	+	5	78.6089	83.2431	72.7345	10.5086	3.52765e-05	0.0168683
ctg3-114190948-114191464	BosBovB	+	6	85.0625	92.2625	76.2737	15.9888	0.00015926	0.0223249
ctg3-114341365-114341722	BosL1B	-	4	53.3061	46.4166	62.1872	-15.7705	0.000580014	0.032187
ctg3-114531104-114531683	BosBovB	-	7	84.48	91.0308	76.4176	14.6132	0.00124915	0.0422702
ctg3-114802386-114802540	BosL1A6	-	3	59.6063	71.4062	45.0833	26.3229	0.000858483	0.0368467
ctg3-115797918-115798216	BosL1A5	-	3	21.1966	10.6167	35.3667	-24.75	0.00171346	0.0484939
ctg3-115820339-115820541	BosL1B	+	4	82.8031	89.4417	74.4975	14.9442	0.00178879	0.0484939
ctg3-116467231-116467698	BosBovB	-	6	81.3217	91.4264	68.9135	22.5129	7.73607e-05	0.0192534
ctg3-116523326-116523522	BosBovB	+	5	78.3111	92.2368	61.5562	30.6807	4.62101e-05	0.017501
ctg3-116642729-116643246	BosL1B	-	5	89.2629	94.0496	83.5585	10.4911	0.00038477	0.028234
ctg3-116766103-116766264	BosL1B	-	4	90.6278	95.4922	84.4004	11.0918	0.00108524	0.0407167
ctg3-117379358-117379586	BosBovB	+	7	88.5833	97.4411	77.6813	19.7598	5.99431e-05	0.0184022
ctg3-117537706-117537969	BosBovB	+	3	68.2351	60.9052	77.2564	-16.3512	0.000580014	0.032187
ctg3-117707980-117708356	BosL1B	-	5	73.9524	81.635	64.4969	17.1381	4.62101e-05	0.017501
ctg3-118041006-118041640	BosL1A8	+	4	79.3239	88.0916	68.4208	19.6708	1.49417e-05	0.014777
ctg3-118446634-118446878	BosL1B	+	5	77.959	88.2	65.3546	22.8454	0.00103778	0.0393834
ctg3-118563261-118563803	BosBovB	-	4	83.1237	91.2024	73.1913	18.0111	0.00015926	0.0223249
ctg3-118848653-118848873	BosL1A6	-	4	53.3722	63.1657	42.0179	21.1478	0.00015926	0.0223249
ctg3-119733461-119733788	BosL1B	+	7	79.0869	83.6741	73.4412	10.2329	0.00178879	0.0484939
ctg3-120133420-120133546	BosBovB	-	6	24.0201	29.1024	17.4003	11.7021	0.00149782	0.0450387
ctg3-120273052-120273375	BosL1B	-	5	81.1114	89.8719	70.3292	19.5426	0.00103778	0.0393834
ctg3-120370577-120371642	BosBovB	+	17	79.6996	85.7005	72.7173	12.9832	0.00178879	0.0484939
ctg3-120475775-120476283	BosBovB	+	8	66.4323	61.7406	72.6087	-10.8681	0.00015926	0.0223249
ctg3-120808088-120808297	BosL1B	+	3	69.0683	73.8531	63.4653	10.3878	0.00183285	0.049578
ctg3-120845019-120845620	BosL1B	+	22	37.021	25.4781	51.2198	-25.7417	4.62101e-05	0.017501
ctg4-395947-396907	BosL1B	-	8	52.7537	57.6765	46.8082	10.8683	0.000296533	0.0262875
ctg4-420195-420660	BosBovB	+	3	62.6125	67.9627	56.1821	11.7807	0.000473624	0.0303043
ctg4-424095-425642	BosL1A6	+	4	56.6052	61.6578	50.2321	11.4257	0.000858483	0.0368467
ctg4-460511-463750	BosBovB	+	11	57.8263	63.9679	50.0801	13.8878	5.9973e-05	0.0184022
ctg4-471240-472316	BosL1B	+	8	67.7725	72.2902	62.0961	10.1942	0.000580014	0.032187
ctg4-475470-480267	BosL1B	+	9	45.3106	50.2188	39.1656	11.0532	0.000311152	0.0262875
ctg4-490972-491547	BosBovB	+	4	51.6142	57.0655	44.9136	12.1519	0.00103778	0.0393834
ctg4-536291-537301	BosBovB	+	3	65.8552	71.5917	58.7949	12.7968	0.000580014	0.032187
ctg4-646323-647101	BosBovB	-	4	56.2521	65.7214	44.7577	20.9637	0.000707298	0.0344551
ctg4-654565-655671	BosBovB	+	5	68.2176	73.4125	61.8238	11.5887	0.000311152	0.0262875
ctg4-866620-867343	BosBovB	-	3	65.5182	73.379	55.9238	17.4552	0.00092863	0.0393834
ctg4-869730-869981	BosBovB	+	6	78.6485	85.8285	69.6262	16.2023	3.52765e-05	0.0168683
ctg4-936461-937369	BosBovB	+	6	72.6896	77.6174	66.6639	10.9536	0.00015926	0.0223249
ctg4-1009118-1010771	BosBovB	+	4	71.4773	77.6888	63.9902	13.6986	0.000858483	0.0368467
ctg4-1022630-1023557	BosL1B	-	4	77.1743	81.8582	71.6856	10.1727	5.9973e-05	0.0184022
ctg4-1028639-1030782	BosL1B	+	3	75.2145	79.6078	69.4635	10.1443	0.000473624	0.0303043
ctg4-1035563-1036317	BosL1B	+	4	66.754	74.0624	57.9704	16.092	0.000858483	0.0368467
ctg4-1099921-1100964	BosBovB	+	10	76.3249	80.9005	70.3653	10.5352	0.000580014	0.032187
ctg4-1149607-1150431	BosBovB	+	3	70.0084	75.1615	63.4013	11.7602	0.000707298	0.0344551
ctg4-1221272-1223100	BosBovB	+	6	73.4775	79.1893	66.2598	12.9295	0.000311152	0.0262875
ctg4-1224479-1226841	BosBovB	+	5	55.2493	61.5592	47.2741	14.2851	0.00149782	0.0450387
ctg4-1328711-1329124	BosBovB	+	3	58.2041	65.5249	49.641	15.8838	1.49417e-05	0.014777
ctg4-1422232-1423682	BosBovB	+	10	77.6583	81.9232	71.8415	10.0817	0.00038477	0.028234
ctg4-1465786-1467573	BosBovB	+	3	67.6416	72.8439	61.4744	11.3695	0.00147414	0.0450387
ctg4-1487410-1488072	BosBovB	-	8	77.4321	82.2066	71.4496	10.7571	0.000126017	0.0210476
ctg4-1688145-1689297	BosBovB	-	7	79.002	83.4166	73.3308	10.0858	4.62101e-05	0.017501
ctg4-1751356-1751657	BosBovB	-	7	81.8017	86.3722	76.2604	10.1118	0.00178879	0.0484939
ctg4-1803191-1804160	BosBovB	-	3	68.7901	73.9801	61.3942	12.5859	0.00178879	0.0484939
ctg4-1823643-1825966	BosBovB	-	8	64.907	70.3697	58.1276	12.2421	0.00038477	0.028234
ctg4-1950363-1951703	BosBovB	+	5	68.4291	74.4499	61.36	13.0899	0.000858483	0.0368467
ctg4-1964449-1965829	BosBovB	-	4	67.6984	74.4458	59.8152	14.6306	4.62101e-05	0.017501
ctg4-1968433-1968916	BosBovB	+	5	69.3648	75.4937	61.9138	13.5798	0.000858483	0.0368467
ctg4-1978582-1979519	BosL1B	+	3	43.1898	48.5906	36.275	12.3156	7.73607e-05	0.0192534
ctg4-1993605-1994870	BosBovB	+	5	62.007	67.6446	55.5828	12.0618	0.00149782	0.0450387
ctg4-2037077-2037767	BosL1A6	+	6	69.1953	74.144	63.3074	10.8366	0.000580014	0.032187
ctg4-2748508-2749155	BosL1A1	-	4	69.7766	76.2496	62.0346	14.215	0.000250236	0.0249233
ctg4-2809414-2809921	BosBovB	-	3	42.6833	47.4271	36.3376	11.0895	2.44562e-05	0.0161846
ctg4-3037090-3037873	BosL1A3	-	14	76.3852	83.0396	68.2361	14.8035	0.000250236	0.0249233
ctg4-3268022-3268673	BosBovB	+	8	84.1855	89.6787	77.5669	12.1118	3.52765e-05	0.0168683
ctg4-5202393-5202801	BosBovB	-	7	80.6478	90.5289	67.6767	22.8522	0.000473624	0.0303043
ctg4-5653336-5653703	BosL1A6	+	3	17.8072	3.91475	35.2044	-31.2896	0.000423444	0.0303043
ctg4-6033894-6034091	BosL1B	+	6	24.3738	12.5971	39.0237	-26.4266	0.00149782	0.0450387
ctg4-6229428-6230713	BosBovB	-	3	75.1483	82.6196	66.6526	15.9671	2.80844e-05	0.0167972
ctg4-6262962-6264675	BosBovB	-	4	73.8078	80.2439	65.9568	14.2871	0.000311152	0.0262875
ctg4-6305310-6306378	BosBovB	-	6	80.6826	85.5042	74.7591	10.7451	4.62101e-05	0.017501
ctg4-6308617-6308893	BosBovB	-	3	70.2023	79.2281	59.0936	20.1345	0.00103778	0.0393834
ctg4-6518143-6518818	BosBovB	+	4	79.4301	84.3938	73.3083	11.0855	0.000858483	0.0368467
ctg4-6676567-6676836	BosBovB	-	5	68.6037	76.9667	58.9422	18.0245	1.49417e-05	0.014777
ctg4-6737174-6737911	BosBovB	+	5	83.8668	88.6787	77.9198	10.7589	5.9973e-05	0.0184022
ctg4-6760845-6762158	BosL1B	+	5	70.492	78.5462	60.8677	17.6785	4.62101e-05	0.017501
ctg4-6821401-6821884	BosBovB	-	7	83.7801	89.837	75.8103	14.0267	0.00124915	0.0422702
ctg4-6945674-6946356	BosBovB	-	6	81.9431	87.4525	75.0156	12.437	0.00015926	0.0223249
ctg4-6991566-6992378	BosL1A3	+	15	82.6955	87.9305	76.126	11.8045	3.52765e-05	0.0168683
ctg4-7086263-7087528	BosL1A6	+	3	56.0542	62.2591	48.5452	13.7138	0.00178879	0.0484939
ctg4-7089688-7092592	BosL1A6	+	4	75.1088	82.2076	66.125	16.0826	0.000250236	0.0249233
ctg4-7279890-7280723	BosL1A3	+	11	87.9918	94.0698	80.6212	13.4487	0.00124915	0.0422702
ctg4-7281662-7285872	BosL1A3	+	6	67.6765	74.0074	59.6244	14.383	0.000858483	0.0368467
ctg4-7297131-7298136	BosBovB	+	4	80.5281	89.2382	69.903	19.3353	0.00103778	0.0393834
ctg4-7409317-7410106	BosBovB	+	5	84.5176	89.8687	77.7506	12.1181	0.00038477	0.028234
ctg4-7677819-7678433	BosL1A3	+	12	27.8532	16.9368	41.6807	-24.744	0.000126017	0.0210476
ctg4-8203469-8203864	BosBovB	+	8	89.3142	94.2326	83.069	11.1636	0.000782573	0.0368467
ctg4-8358021-8358398	BosL1B	-	5	86.1477	93.8081	76.4628	17.3454	0.000858483	0.0368467
ctg4-9398131-9398278	BosBovB	+	3	85.646	96.1708	72.6923	23.4785	0.000698928	0.0344551
ctg4-10369778-10370858	BosBovB	-	7	88.2909	95.0101	80.5536	14.4565	0.00124915	0.0422702
ctg4-10970375-10973064	BosL1A6	-	5	80.2471	84.9008	74.2631	10.6377	0.00038477	0.028234
ctg4-11031916-11032987	BosL1A6	-	5	71.1903	79.0306	61.5408	17.4899	0.00124915	0.0422702
ctg4-11190771-11191274	BosL1A5	-	5	72.4833	82.0646	61.0463	21.0183	0.000707298	0.0344551
ctg4-11714559-11715062	BosL1B	+	4	76.4161	82.1206	69.8333	12.2873	0.000126017	0.0210476
ctg4-13137924-13139361	BosL1B	-	8	67.2748	78.466	53.4214	25.0446	0.000126017	0.0210476
ctg4-13946539-13949423	BosL1A6	+	9	78.851	84.4607	71.8577	12.603	0.000580014	0.032187
ctg4-14897904-14899008	BosBovB	-	7	73.2772	79.4689	66.2265	13.2425	0.000580014	0.032187
ctg4-15028324-15030043	BosL1A3	+	26	78.9253	84.9463	71.6721	13.2742	2.67594e-05	0.0161846
ctg4-15698127-15698311	BosL1A5	-	3	77.2217	85.2731	67.2733	17.9998	0.000858483	0.0368467
ctg4-15766530-15767574	BosBovB	-	10	55.4557	49.1235	63.1388	-14.0154	0.00015926	0.0223249
ctg4-16091438-16092243	BosBovB	-	7	85.764	93.7674	75.2169	18.5505	0.000126017	0.0210476
ctg4-16978633-16979699	BosL1B	-	13	77.8472	82.4721	72.1849	10.2872	0.00124915	0.0422702
ctg4-17023741-17024183	BosL1B	-	3	74.0738	79.3298	69.0959	10.2339	0.000473624	0.0303043
ctg4-17288480-17289060	BosBovB	-	3	75.5826	81.3213	69.159	12.1623	0.000858483	0.0368467
ctg4-17595764-17596167	BosBovB	+	5	72.7229	77.341	67.3216	10.0194	0.00149782	0.0450387
ctg4-17654956-17656188	BosBovB	-	8	67.5255	72.6657	61.702	10.9637	0.00038477	0.028234
ctg4-18347644-18348693	BosBovB	+	4	71.3983	76.6848	64.9981	11.6868	0.000311152	0.0262875
ctg4-19655859-19656343	BosBovB	-	5	67.8371	61.7134	74.9995	-13.2861	9.90217e-05	0.0201357
ctg4-20627847-20628198	BosL1B	-	5	46.5838	34.5075	61.4469	-26.9394	0.000126017	0.0210476
ctg4-20880310-20880671	BosL1B	+	4	38.9833	30.6909	49.5171	-18.8262	0.00092863	0.0393834
ctg4-21345469-21346269	BosL1A3	-	6	73.1843	83.4842	60.3284	23.1558	0.00038477	0.028234
ctg4-22028734-22030599	BosBovB	-	6	80.4394	75.6812	86.4798	-10.7986	0.000126017	0.0210476
ctg4-23286679-23287988	BosBovB	+	5	76.8755	83.2587	69.7046	13.5541	0.00015926	0.0223249
ctg4-23982056-23983623	BosBovB	-	6	77.8076	72.2318	84.7026	-12.4708	3.52765e-05	0.0168683
ctg4-24675319-24676327	BosBovB	-	3	86.9919	79.825	94.8033	-14.9783	0.00143464	0.0450387
ctg4-25132499-25132754	BosBovB	+	6	86.375	93.3087	78.1035	15.2052	0.000250236	0.0249233
ctg4-29646508-29647219	BosBovB	-	4	77.3319	82.0241	71.7809	10.2431	0.00117239	0.0422702
ctg4-30599080-30599468	BosBovB	-	6	80.7716	90.7318	68.72	22.0118	0.00103778	0.0393834
ctg4-30618069-30618774	BosBovB	-	4	68.3222	73.4685	62.0639	11.4046	0.000250236	0.0249233
ctg4-30673697-30673926	BosL1B	-	3	87.4253	94.4615	78.7654	15.6961	0.000250236	0.0249233
ctg4-31296878-31296952	BosBovB	-	3	78.6876	87.1991	68.8252	18.3739	0.000148393	0.0223249
ctg4-31408710-31409466	BosBovB	-	4	87.9062	93.4233	81.4317	11.9916	0.00149782	0.0450387
ctg4-31409467-31409783	BosBovB	-	3	78.3126	94.2885	58.65	35.6385	0.00017594	0.0236464
ctg4-31929940-31930616	BosL1B	-	11	89.152	96.6435	79.562	17.0816	3.52765e-05	0.0168683
ctg4-32614747-32617677	BosL1A3	-	42	80.1507	86.3517	72.3664	13.9853	0.000311152	0.0262875
ctg4-32689524-32691114	BosBovB	+	13	70.3387	76.0998	62.9766	13.1232	0.000580014	0.032187
ctg4-33025081-33025153	BosBovB	-	3	86.9189	91.5251	81.2782	10.2469	0.00015926	0.0223249
ctg4-33098467-33100180	BosL1A3	+	39	34.3761	39.5579	28.3073	11.2506	0.00149782	0.0450387
ctg4-33860803-33861314	BosL1A6	-	4	80.663	85.845	73.8229	12.0221	0.000473624	0.0303043
ctg4-34042981-34043953	BosBovB	-	7	82.5742	87.6345	75.7474	11.8871	0.000473624	0.0303043
ctg4-34357324-34358585	BosL1A6	+	6	71.2392	77.1607	64.1455	13.0151	0.000473624	0.0303043
ctg4-35993535-35994040	BosBovB	+	3	51.3759	40.4823	64.7833	-24.301	0.00108061	0.0407167
ctg4-36637768-36637832	BosBovB	-	8	86.5061	93.9524	77.4467	16.5057	0.00124915	0.0422702
ctg4-40212773-40213145	BosL1B	-	3	87.519	92.951	80.8333	12.1177	0.000707298	0.0344551
ctg4-40217062-40217516	BosL1B	-	10	81.9895	91.8123	69.8196	21.9926	0.00038477	0.028234
ctg4-40406447-40407060	BosBovB	+	8	84.6379	89.7958	79.1008	10.695	0.000473624	0.0303043
ctg4-41241222-41241623	BosL1B	+	3	82.5988	87.3425	76.9925	10.35	0.00038477	0.028234
ctg4-43425679-43426005	BosL1B	+	3	85.6084	91.8698	77.47	14.3997	0.00149782	0.0450387
ctg4-43440328-43441550	BosL1B	+	4	83.8146	92.0415	73.6222	18.4193	0.000707298	0.0344551
ctg4-44035773-44036652	BosL1B	-	4	61.025	53.1648	70.699	-17.5342	0.00015926	0.0223249
ctg4-44419239-44419439	BosL1B	-	5	83.4808	90.0031	75.3469	14.6562	0.000580014	0.032187
ctg4-47254378-47254706	BosL1A3	-	7	50.2306	57.9759	40.0027	17.9732	2.00696e-05	0.0154155
ctg4-47733972-47734580	BosL1A3	-	8	79.7904	87.7855	69.6505	18.1349	0.00124915	0.0422702
ctg4-48372393-48373032	BosBovB	-	10	66.862	58.1113	77.5838	-19.4726	0.000858483	0.0368467
ctg4-48819816-48820008	BosBovB	+	3	87.0361	92.5045	80.0853	12.4192	0.000200254	0.0236464
ctg4-48920656-48921032	BosL1A6	-	3	81.9384	87.1786	75.641	11.5376	0.00103778	0.0393834
ctg4-49469189-49469815	BosL1A6	+	6	74.8853	69.183	81.2939	-12.1108	0.000200254	0.0236464
ctg4-49718199-49718678	BosBovB	+	4	78.0284	82.8294	72.0845	10.7449	0.00184607	0.0497498
ctg4-52199647-52200215	BosL1A6	+	3	78.8908	86.3191	70.0118	16.3073	0.000473624	0.0303043
ctg4-53216001-53216352	BosL1A6	+	3	74.5977	68.5687	82.0179	-13.4492	1.09926e-05	0.0145334
ctg4-53560014-53560249	BosL1B	-	5	85.6689	92.5104	77.1469	15.3635	4.62101e-05	0.017501
ctg4-53683942-53684467	BosBovB	-	7	79.2169	74.449	85.0819	-10.633	0.000311152	0.0262875
ctg4-55016557-55016675	BosL1A8	-	3	76.0667	85.9678	64.6423	21.3255	0.00151984	0.0456061
ctg4-56272816-56272994	BosBovB	+	6	73.9985	68.8745	80.175	-11.3005	0.000473624	0.0303043
ctg4-56690242-56690993	BosL1A3	+	7	74.616	80.2335	67.7022	12.5313	0.000311152	0.0262875
ctg4-56752756-56753614	BosBovB	-	5	74.0617	83.0713	62.9731	20.0982	2.85866e-06	0.0138096
ctg4-57087001-57087269	BosL1A3	-	4	84.8783	90.5016	78.3421	12.1595	1.49417e-05	0.014777
ctg4-58323363-58324200	BosBovB	-	6	74.3519	79.0469	68.4304	10.6164	8.01604e-06	0.0139836
ctg4-58423645-58425108	BosBovB	+	4	68.7861	75.1145	60.641	14.4735	9.90217e-05	0.0201357
ctg4-58447970-58448098	BosBovB	-	4	70.1663	76.8875	61.9709	14.9166	0.000843915	0.0368467
ctg4-59902867-59903288	BosBovB	-	4	89.3885	95.3654	82.2452	13.1202	0.00038477	0.028234
ctg4-60902960-60903360	BosL1A1	-	3	14.322	4.27604	27.0141	-22.7381	0.0011173	0.041907
ctg4-62447519-62448754	BosBovB	-	11	81.9576	90.5795	70.7938	19.7857	0.000126017	0.0210476
ctg4-64581774-64581895	BosBovB	+	3	72.8711	78.8319	65.9326	12.8993	4.09121e-05	0.017501
ctg4-65709068-65709207	BosBovB	-	4	92.8384	97.818	86.7096	11.1084	0.0012329	0.0422702
ctg4-65838760-65842942	BosL1B	-	11	86.582	91.8078	80.2748	11.533	0.000250236	0.0249233
ctg4-66186381-66187277	BosL1B	+	6	71.6044	67.2441	77.447	-10.2029	9.90217e-05	0.0201357
ctg4-66938177-66938556	BosL1A8	+	6	81.9162	86.6063	76.3343	10.2721	0.00149782	0.0450387
ctg4-66944618-66945087	BosL1B	+	4	66.3216	74.4468	56.3464	18.1004	0.00178879	0.0484939
ctg4-67903213-67903903	BosBovB	-	6	49.8557	41.6124	59.9414	-18.3289	0.00149782	0.0450387
ctg4-68462100-68462928	BosBovB	+	13	87.1357	93.9128	78.6358	15.2771	0.00015926	0.0223249
ctg4-69935031-69935448	BosBovB	-	3	84.254	78.4427	91.4064	-12.9637	0.000311152	0.0262875
ctg4-71404303-71404674	BosL1B	+	4	42.7634	33.7406	54.1999	-20.4592	0.000311152	0.0262875
ctg4-72456745-72457552	BosBovB	-	7	69.3074	63.4942	76.9768	-13.4826	1.97454e-06	0.0126103
ctg4-72467321-72468199	BosBovB	-	11	69.9974	65.3071	75.7926	-10.4855	0.000858483	0.0368467
ctg4-72517999-72518464	BosBovB	+	7	81.8512	87.8018	74.3787	13.423	0.00103778	0.0393834
ctg4-72603774-72604666	BosL1B	+	4	68.9188	76.9286	59.1446	17.7841	0.000580014	0.032187
ctg4-73748214-73749206	BosBovB	+	5	74.4283	81.0433	66.4028	14.6405	0.000473624	0.0303043
ctg4-76402568-76402766	BosL1B	+	3	78.5086	83.2615	72.659	10.6025	0.00117239	0.0422702
ctg4-76430753-76431415	BosL1B	+	4	78.1543	86.2812	68.1519	18.1293	7.73607e-05	0.0192534
ctg4-78986880-78987011	BosL1A8	-	3	82.4627	90.0083	73.8303	16.1779	0.00147414	0.0450387
ctg4-79176946-79177334	BosBovB	-	3	79.0681	89.8902	65.2519	24.6383	0.00103778	0.0393834
ctg4-79190890-79191756	BosBovB	+	3	57.4127	45.2452	70.5216	-25.2763	0.000298841	0.0262875
ctg4-81049346-81049778	BosBovB	+	3	81.8839	90.8958	70.7923	20.1035	0.000126017	0.0210476
ctg4-81297648-81298840	BosBovB	+	5	71.8818	77.8282	64.5964	13.2317	0.000858483	0.0368467
ctg4-81775682-81776286	BosL1B	+	3	69.7987	78.2363	59.4913	18.7451	0.00125966	0.0424657
ctg4-83448463-83449014	BosL1A3	-	10	73.1593	77.9942	67.2738	10.7204	0.000200254	0.0236464
ctg4-83509279-83510147	BosBovB	-	3	70.4773	75.1922	64.9244	10.2679	0.000707298	0.0344551
ctg4-83579285-83579653	BosBovB	+	4	66.8466	71.6495	60.549	11.1005	0.000858483	0.0368467
ctg4-83662568-83662842	BosL1B	+	3	67.7812	73.5568	60.8098	12.747	0.00038477	0.028234
ctg4-83763640-83763828	BosBovB	+	3	76.6313	82.2338	69.519	12.7148	0.000473624	0.0303043
ctg4-84201723-84202025	BosL1A1	-	5	70.5093	76.2059	64.1806	12.0253	3.63761e-05	0.0173721
ctg4-84211943-84212875	BosBovB	-	4	62.2367	67.2517	55.7628	11.4889	7.73607e-05	0.0192534
ctg4-87557116-87557154	BosBovB	+	3	86.5511	92.2948	79.4821	12.8127	0.00136453	0.0450387
ctg4-88525846-88526485	BosBovB	+	3	76.273	82.6573	68.4154	14.2419	0.000311152	0.0262875
ctg4-89298329-89298513	BosBovB	+	6	82.8461	88.728	76.0839	12.6442	0.000858483	0.0368467
ctg4-90503526-90504796	BosBovB	+	4	69.6595	74.8576	63.1903	11.6672	0.000707298	0.0344551
ctg4-90988357-90988572	BosL1B	+	3	75.4397	81.2812	68.25	13.0312	0.000250236	0.0249233
ctg4-91300736-91303683	BosL1B	+	10	72.3619	76.998	66.8703	10.1277	0.00149782	0.0450387
ctg4-91342607-91343115	BosL1B	-	3	74.1402	83.0024	63.8583	19.1441	0.000676282	0.0344551
ctg4-91396927-91397893	BosL1B	-	6	66.7518	72.2771	59.7374	12.5397	4.62101e-05	0.017501
ctg4-92541550-92541867	BosBovB	-	3	79.7506	87.9427	69.6679	18.2748	0.000311152	0.0262875
ctg4-92984036-92984524	BosBovB	-	8	60.3578	52.7859	69.5115	-16.7256	0.00149782	0.0450387
ctg4-93166678-93167437	BosBovB	+	7	91.273	96.9806	84.5231	12.4575	0.00158966	0.0475045
ctg4-93270529-93270608	BosBovB	+	3	76.9734	91.8914	61.2897	30.6016	9.27777e-05	0.0201357
ctg4-93273008-93273665	BosBovB	-	3	80.2218	84.8208	74.5615	10.2593	1.97454e-06	0.0126103
ctg4-94716120-94716844	BosBovB	+	7	53.2783	47.1256	61.054	-13.9284	4.62101e-05	0.017501
ctg4-95051074-95051460	BosL1B	-	6	75.2287	84.3322	64.0217	20.3105	0.000250236	0.0249233
ctg4-95375397-95375560	BosBovB	+	7	11.629	3.20491	22.1021	-18.8971	0.000122104	0.0210476
ctg4-95659510-95659746	BosL1A7	+	3	64.175	77.2763	49.4043	27.872	0.000589315	0.0326984
ctg4-96519960-96520509	BosL1A6	-	7	88.8317	97.0082	78.6238	18.3845	0.00024877	0.0249233
ctg4-96624279-96625231	BosBovB	+	9	92.3363	97.085	86.8158	10.2692	0.000473624	0.0303043
ctg4-97745551-97745678	BosL1A6	-	3	31.9103	15.2449	52.5132	-37.2684	0.000580014	0.032187
ctg4-98237379-98238298	BosBovB	-	7	85.4442	91.0965	78.7697	12.3267	2.67594e-05	0.0161846
ctg4-98809536-98809626	BosBovB	+	5	68.8437	64.4237	74.5574	-10.1337	1.09926e-05	0.0145334
ctg4-98977247-98977393	BosBovB	+	4	88.2382	96.4366	77.3989	19.0377	0.00140354	0.0450387
ctg4-99792581-99793178	BosL1B	+	4	70.3884	77.4953	61.6413	15.854	0.00149782	0.0450387
ctg4-99889499-99890260	BosBovB	-	3	72.9715	86.6232	56.2269	30.3963	0.000580014	0.032187
ctg4-99959466-99960460	BosBovB	+	8	81.4132	86.3659	75.2156	11.1503	9.90217e-05	0.0201357
ctg4-101741098-101741273	BosBovB	+	3	88.4649	94.4854	81.0551	13.4303	0.00085717	0.0368467
ctg4-101741412-101741591	BosBovB	-	6	66.6958	75.9232	55.5556	20.3677	7.73607e-05	0.0192534
ctg4-101842941-101843548	BosL1A3	+	13	79.7132	87.5353	70.3517	17.1836	0.000858483	0.0368467
ctg4-102363863-102367170	BosL1A3	+	12	75.1301	80.1518	69.2089	10.9429	4.09643e-06	0.0139836
ctg4-104336152-104337117	BosL1B	-	7	76.6057	81.7126	70.1173	11.5953	0.000488955	0.0309333
ctg4-104500532-104501050	BosL1B	-	3	67.2603	74.5	58.35	16.15	0.000126017	0.0210476
ctg4-104510043-104510740	BosL1A8	-	3	64.076	73.8739	51.8889	21.985	0.000580014	0.032187
ctg4-104618343-104618616	BosL1B	+	3	64.3611	70.7062	56.2127	14.4935	0.000580014	0.032187
ctg4-105531427-105533830	BosL1B	-	3	72.3862	77.6208	65.9436	11.6772	0.00038477	0.028234
ctg4-105954774-105955900	BosBovB	+	5	84.6851	90.4829	77.8383	12.6447	4.62101e-05	0.017501
ctg4-107311347-107312110	BosBovB	+	5	67.2095	73.7721	59.7437	14.0284	0.00149782	0.0450387
ctg4-107356296-107357055	BosL1B	-	3	75.746	81.1645	69.2763	11.8882	2.67594e-05	0.0161846
ctg4-108055849-108056513	BosL1B	+	10	70.0467	82.2711	54.6097	27.6614	0.00147414	0.0450387
ctg4-108941835-108943581	BosBovB	-	6	63.762	69.1666	57.8487	11.3178	0.00124915	0.0422702
ctg4-109307687-109307731	BosBovB	-	4	85.4083	90.9242	78.7036	12.2206	0.000496309	0.0313827
ctg4-109685395-109685867	BosBovB	+	4	73.1912	79.9777	64.5955	15.3822	0.00103778	0.0393834
ctg4-110989598-110990115	BosL1B	-	5	68.8909	74.2106	62.1817	12.0288	4.62101e-05	0.017501
ctg4-111179342-111180141	BosBovB	+	7	70.9612	77.3757	62.8706	14.5052	0.000250236	0.0249233
ctg4-112737979-112738212	BosBovB	+	9	42.4197	48.4305	34.9753	13.4552	2.67594e-05	0.0161846
ctg4-114083632-114085255	BosL1B	-	14	55.1913	60.2258	48.9448	11.281	0.000707298	0.0344551
ctg4-114120704-114121416	BosBovB	-	11	88.2073	94.0757	80.967	13.1088	0.00103778	0.0393834
ctg4-114291728-114291912	BosL1B	+	5	62.3505	52.9884	73.9723	-20.9839	0.00015926	0.0223249
ctg4-114473167-114473768	BosL1B	-	9	63.442	56.4624	71.9076	-15.4452	0.000311152	0.0262875
ctg4-114581383-114581883	BosL1B	-	5	90.0364	96.1518	82.5731	13.5787	0.00178879	0.0484939
ctg4-114751637-114752212	BosBovB	-	5	90.9731	95.7518	85.1869	10.5649	0.000311152	0.0262875
ctg4-115563894-115565785	BosBovB	-	5	83.208	88.1494	77.3881	10.7613	0.00124915	0.0422702
ctg4-115719916-115722219	BosBovB	-	5	82.4496	87.5876	76.2762	11.3114	5.9973e-05	0.0184022
ctg4-115859355-115860196	BosBovB	-	7	75.5431	81.2517	68.906	12.3457	0.00124915	0.0422702
ctg4-115871265-115873110	BosBovB	-	5	78.6415	83.8077	72.3004	11.5073	0.00038477	0.028234
ctg4-115931285-115931525	BosL1B	-	5	82.2338	87.5288	75.7169	11.8118	0.000488955	0.0309333
ctg4-116097123-116097637	BosBovB	-	5	73.4535	79.6269	65.9071	13.7198	0.000126017	0.0210476
ctg4-116974264-116974970	BosL1B	+	12	77.9085	86.8059	67.1024	19.7035	0.000580014	0.032187
ctg4-116989601-116990643	BosBovB	-	6	75.6334	81.2567	68.5388	12.7179	0.000250236	0.0249233
ctg4-118013475-118013528	BosBovB	+	6	85.8168	92.0629	77.9321	14.1308	0.000477339	0.0305058
ctg4-118267155-118268456	BosBovB	+	13	90.1854	95.5816	83.4373	12.1443	2.00696e-05	0.0154155
ctg4-118318879-118319982	BosBovB	+	5	81.8224	87.2946	75.3762	11.9185	0.00124915	0.0422702
ctg4-118344393-118344598	BosBovB	-	7	90.3581	94.9808	84.6687	10.3121	1.49417e-05	0.014777
ctg4-118744470-118745100	BosL1B	+	28	84.4922	90.5785	77.0244	13.5541	0.000250236	0.0249233
ctg4-119172450-119173515	BosBovB	-	4	74.2356	79.173	68.1452	11.0278	0.00124915	0.0422702
ctg4-119271154-119271418	BosL1B	-	7	74.0596	88.9489	57.0085	31.9403	2.00696e-05	0.0154155
ctg4-119493400-119494128	BosBovB	-	9	88.8094	94.9678	80.9505	14.0172	1.09926e-05	0.0145334
ctg4-119646837-119647521	BosL1A5	+	5	34.472	22.3761	48.9354	-26.5593	0.00103778	0.0393834
ctg4-119729777-119730083	BosL1B	+	9	91.1726	96.6267	84.6518	11.9748	0.000381556	0.028234
ctg4-119729971-119730102	BosL1A3	+	5	90.248	97.133	82.1512	14.9818	0.000293988	0.0262875
ctg4-119735069-119735336	BosL1B	+	6	15.2281	5.55247	27.3693	-21.8168	0.000580014	0.032187
ctg5-121062-121600	BosBovB	-	4	44.0206	48.8008	38.5125	10.2883	0.000858483	0.0368467
ctg5-158828-160096	BosBovB	-	3	59.6833	66.151	51.7231	14.428	0.00103778	0.0393834
ctg5-536914-537992	BosBovB	-	4	75.117	80.0796	69.0042	11.0754	4.62101e-05	0.017501
ctg5-2594404-2595840	BosL1A3	+	11	66.6329	79.5222	51.6471	27.8752	5.9973e-05	0.0184022
ctg5-3682808-3683270	BosBovB	-	3	59.8535	70.5853	46.9705	23.6148	0.00124915	0.0422702
ctg5-4287147-4287511	BosL1B	+	3	63.3902	71.3836	53.4184	17.9652	0.00149782	0.0450387
ctg5-5197624-5198381	BosBovB	+	3	70.034	76.9978	61.5408	15.4569	0.000200254	0.0236464
ctg5-5942751-5943888	BosL1B	+	6	61.1865	53.2522	70.9458	-17.6936	0.00124915	0.0422702
ctg5-5966831-5967130	BosL1B	+	3	21.3144	4.52187	41.9821	-37.4602	0.000339293	0.028234
ctg5-6651947-6652407	BosL1A3	+	9	73.6406	79.0225	67.146	11.8765	3.52765e-05	0.0168683
ctg5-7318309-7319191	BosBovB	-	10	88.229	96.0012	79.5152	16.486	0.000858483	0.0368467
ctg5-9870958-9871464	BosBovB	-	5	49.8767	40.4835	61.4387	-20.9552	0.00100411	0.0393834
ctg5-10002749-10003000	BosL1A3	-	8	83.7751	89.775	77.1371	12.6379	2.00696e-05	0.0154155
ctg5-10405823-10405972	BosBovB	+	6	70.4765	63.7215	78.359	-14.6375	0.00149782	0.0450387
ctg5-11111486-11111578	BosBovB	-	3	75.9983	83.6094	66.6308	16.9786	0.00124915	0.0422702
ctg5-12233331-12233495	BosL1A6	-	4	86.7796	81.5245	92.6686	-11.144	3.52765e-05	0.0168683
ctg5-16808243-16809549	BosBovB	+	6	72.6925	80.6143	64.6968	15.9175	7.73607e-05	0.0192534
ctg5-17661045-17661361	BosL1A2	-	3	81.215	86.6022	74.7667	11.8355	0.000124242	0.0210476
ctg5-18027212-18028022	BosBovB	-	3	76.4321	81.2275	70.5345	10.693	0.00178879	0.0484939
ctg5-19443035-19443100	BosBovB	+	7	79.2149	84.2399	72.688	11.5519	0.000825002	0.0368467
ctg5-20217793-20217918	BosBovB	+	3	78.9943	86.6565	69.3749	17.2816	0.00103778	0.0393834
ctg5-22124303-22124691	BosBovB	+	3	88.3609	94.926	80.2808	14.6453	0.000413947	0.0301142
ctg5-22185278-22185823	BosBovB	-	8	86.4711	91.3599	80.1075	11.2524	0.000858483	0.0368467
ctg5-22761738-22762554	BosL1B	+	9	87.0427	96.7463	75.1975	21.5488	2.00696e-05	0.0154155
ctg5-22762681-22763945	BosL1B	+	8	85.9605	90.8041	79.875	10.9291	0.00124915	0.0422702
ctg5-22774647-22774813	BosBovB	-	4	90.3876	96.0483	83.3579	12.6904	0.000350963	0.028234
ctg5-23585604-23586545	BosBovB	-	6	65.8848	61.2675	71.5657	-10.2981	0.000858483	0.0368467
ctg5-25481223-25481470	BosL1B	+	4	78.1617	84.6801	69.8384	14.8416	0.00149782	0.0450387
ctg5-26664359-26664569	BosBovB	-	3	90.0977	96.5229	82.1897	14.3332	0.0015722	0.0471173
ctg5-26842368-26842752	BosL1B	-	3	64.576	53.4802	79.5562	-26.076	5.74679e-06	0.0139836
ctg5-27704016-27705852	BosBovB	+	8	78.9825	83.7708	73.1131	10.6577	0.000473624	0.0303043
ctg5-27967919-27969386	BosBovB	+	14	79.4634	84.4967	73.7175	10.7792	5.74679e-06	0.0139836
ctg5-28401286-28401374	BosBovB	+	6	89.9966	95.1611	83.4056	11.7555	9.90217e-05	0.0201357
ctg5-28820219-28821247	BosBovB	-	5	75.7459	87.0119	61.6553	25.3566	4.62101e-05	0.017501
ctg5-29099303-29099765	BosBovB	+	3	87.8872	95.0537	79.2916	15.7621	0.00090182	0.0386847
ctg5-29313353-29313781	BosBovB	+	3	85.6933	94.2531	74.7222	19.5309	5.99431e-05	0.0184022
ctg5-31187372-31190084	BosBovB	-	17	84.5273	90.0281	77.9062	12.1219	0.00103778	0.0393834
ctg5-31947748-31947813	BosBovB	+	3	75.772	69.7161	82.9923	-13.2762	0.00103778	0.0393834
ctg5-33766831-33767750	BosBovB	-	10	52.3444	42.6417	64.3217	-21.68	0.00149782	0.0450387
ctg5-35930502-35930989	BosBovB	-	5	75.4851	80.1875	69.93	10.2575	0.00178879	0.0484939
ctg5-36093344-36093818	BosL1B	+	3	45.5782	40.4875	51.8436	-11.3561	0.000858436	0.0368467
ctg5-36335378-36336483	BosBovB	-	3	74.1742	67.4557	82.2606	-14.8049	0.00155745	0.0467089
ctg5-39165546-39166248	BosBovB	-	4	55.7261	60.6704	49.9782	10.6922	0.000858483	0.0368467
ctg5-40229590-40230148	BosBovB	-	7	70.1844	78.0313	60.3528	17.6785	3.52765e-05	0.0168683
ctg5-40683060-40683735	BosBovB	+	3	86.6043	95.8649	76.0749	19.79	0.00100109	0.0393834
ctg5-41045495-41045864	BosBovB	+	5	40.729	34.8332	48.0115	-13.1784	0.000858483	0.0368467
ctg5-41143952-41144393	BosL1A6	+	5	87.4185	92.9698	82.0509	10.9189	0.0009165	0.0392742
ctg5-42181738-42182977	BosL1B	-	3	38.6809	29.2937	50.6987	-21.405	0.000200254	0.0236464
ctg5-42687775-42688161	BosL1A4	+	3	88.8222	93.4583	82.8606	10.5977	0.000350963	0.028234
ctg5-43790587-43790885	BosL1B	-	4	80.7541	91.9094	66.5342	25.3752	0.00149782	0.0450387
ctg5-44463691-44464041	BosBovB	-	3	86.5155	93.4222	78.3115	15.1107	0.000575562	0.032187
ctg5-44487746-44488760	BosL1B	+	5	85.5364	91.5415	78.1303	13.4112	0.00015926	0.0223249
ctg5-44503260-44503289	BosBovB	-	3	88.1181	93.379	81.8154	11.5636	0.00149782	0.0450387
ctg5-45438449-45438714	BosBovB	+	8	80.6564	92.8717	66.8396	26.0321	0.000903148	0.0387329
ctg5-45682211-45682760	BosBovB	-	5	77.2696	89.7625	62.0453	27.7173	0.000707298	0.0344551
ctg5-45721832-45722021	BosL1B	+	4	83.9582	92.2523	73.75	18.5023	0.00178879	0.0484939
ctg5-47456533-47457893	BosBovB	-	13	89.0931	93.8224	83.357	10.4654	0.00149782	0.0450387
ctg5-47571005-47571071	BosBovB	-	3	28.0557	12.3698	47.3615	-34.9917	0.000580014	0.032187
ctg5-47985421-47986026	BosBovB	-	11	77.7704	73.2646	83.3034	-10.0388	4.62101e-05	0.017501
ctg5-48475474-48476150	BosBovB	+	7	74.1388	69.3657	79.8176	-10.4519	0.00015926	0.0223249
ctg5-48517630-48518136	BosBovB	+	4	61.6841	53.7969	71.3913	-17.5945	0.000858483	0.0368467
ctg5-50777122-50777739	BosBovB	-	3	90.6236	95.6698	84.4128	11.257	0.000676282	0.0344551
ctg5-51982957-51983990	BosL1B	+	3	71.568	79.0203	62.5932	16.4271	0.000473624	0.0303043
ctg5-52026639-52026730	BosBovB	+	4	28.0056	23.1609	33.9683	-10.8073	0.00178879	0.0484939
ctg5-52218668-52218765	BosBovB	+	4	70.2572	64.1113	77.3682	-13.2568	0.000286255	0.0262875
ctg5-52253851-52254147	BosBovB	-	4	78.984	84.3069	72.6375	11.6694	0.00149926	0.0450531
ctg5-52546722-52548014	BosBovB	-	6	73.4941	78.7043	66.8068	11.8975	0.00103778	0.0393834
ctg5-52643537-52645029	BosBovB	-	9	76.1605	82.3137	68.8001	13.5137	1.49417e-05	0.014777
ctg5-53004956-53006229	BosBovB	+	6	65.1036	70.1893	58.9075	11.2818	0.00124915	0.0422702
ctg5-55540849-55541546	BosBovB	-	9	59.2803	48.9127	72.4888	-23.5762	0.000707298	0.0344551
ctg5-56056415-56057349	BosL1B	+	3	90.3032	96.1885	83.013	13.1755	0.00107907	0.0407167
ctg5-56514016-56514853	BosL1A3	+	16	82.3095	89.8636	73.2327	16.6309	0.00103778	0.0393834
ctg5-56514593-56515009	BosL1A2	+	7	80.5981	89.0735	70.9647	18.1088	1.09926e-05	0.0145334
ctg5-57172097-57172414	BosL1B	-	3	72.3977	67.074	78.95	-11.876	0.000250236	0.0249233
ctg5-57249267-57250021	BosBovB	-	6	90.3764	95.1629	84.4705	10.6924	9.90217e-05	0.0201357
ctg5-57936661-57937082	BosBovB	+	5	72.8566	77.3937	67.2723	10.1214	0.000473624	0.0303043
ctg5-58313726-58314173	BosBovB	-	3	77.0132	81.9957	70.7295	11.2662	0.000707298	0.0344551
ctg5-58329732-58332910	BosL1A4	+	10	71.6591	77.1946	65.0406	12.154	3.52765e-05	0.0168683
ctg5-58344695-58345506	BosBovB	+	6	77.7907	82.9873	72.227	10.7602	0.000707298	0.0344551
ctg5-58506246-58506817	BosBovB	-	3	60.7323	67.7948	52.3949	15.3999	0.0013664	0.0450387
ctg5-59107494-59109012	BosL1A3	-	8	71.1497	75.7839	65.5134	10.2704	0.000200254	0.0236464
ctg5-59669337-59669735	BosL1A2	+	3	71.1826	76.6988	64.6516	12.0472	0.00124915	0.0422702
ctg5-60352252-60352880	BosBovB	-	6	90.2276	96.0505	83.0609	12.9896	0.00178879	0.0484939
ctg5-60512376-60513099	BosBovB	+	12	88.7172	94.2102	81.8443	12.3659	0.00124915	0.0422702
ctg5-60631587-60633357	BosBovB	+	6	91.446	97.2659	83.8266	13.4393	0.000656807	0.0344551
ctg5-60651736-60652406	BosBovB	-	11	58.6088	50.4336	69.5874	-19.1538	0.000126017	0.0210476
ctg5-60735343-60735492	BosBovB	+	4	20.3307	4.48199	39.5971	-35.1151	0.000207143	0.0244217
ctg5-62357226-62360342	BosBovB	+	10	79.8589	84.3977	74.3484	10.0493	0.00124915	0.0422702
ctg5-62674485-62674534	BosBovB	+	3	91.1305	96.6969	83.8361	12.8608	0.000447095	0.0303043
ctg5-63548127-63548620	BosBovB	+	4	88.1451	92.5946	82.532	10.0626	0.000672149	0.0344551
ctg5-64161624-64161682	BosBovB	-	3	24.3276	6.17708	46.6667	-40.4896	6.93517e-05	0.0192534
ctg5-65195340-65196199	BosL1B	-	3	84.8483	90.824	77.4936	13.3304	0.00178879	0.0484939
ctg5-66416173-66416547	BosL1B	-	5	40.1477	32.3835	49.0808	-16.6973	7.73607e-05	0.0192534
ctg5-66429277-66429443	BosBovB	-	3	49.4218	54.6063	43.041	11.5652	0.00171346	0.0484939
ctg5-66699657-66700920	BosBovB	+	13	82.7959	87.7904	76.6423	11.1481	0.00015926	0.0223249
ctg5-67090484-67090705	BosL1B	-	3	84.3599	89.235	78.2861	10.9489	0.00184607	0.0497498
ctg5-67518367-67518512	BosBovB	+	5	54.2809	46.7153	63.4	-16.6847	0.000858483	0.0368467
ctg5-67696751-67696849	BosL1B	-	3	77.2033	90.5324	60.9373	29.5952	0.00124915	0.0422702
ctg5-68368936-68369936	BosBovB	+	7	89.3163	97.2828	79.502	17.7808	0.000674213	0.0344551
ctg5-68809049-68809130	BosBovB	-	4	88.8603	97.212	78.725	18.487	6.93517e-05	0.0192534
ctg5-70297989-70298214	BosL1A2	-	4	81.9121	93.2409	67.5925	25.6484	2.67594e-05	0.0161846
ctg5-71499458-71499616	BosBovB	-	6	19.8746	4.387	36.5065	-32.1195	0.00079122	0.0368467
ctg5-71774589-71777277	BosBovB	-	3	60.9774	70.408	50.1295	20.2785	0.00038477	0.028234
ctg5-72693324-72693403	BosBovB	+	5	83.7523	93.1038	72.0608	21.043	2.67594e-05	0.0161846
ctg5-73487321-73488613	BosBovB	+	9	74.9468	79.724	68.9388	10.7852	0.00149782	0.0450387
ctg5-73692799-73693346	BosL1B	-	9	13.4234	4.5691	24.4973	-19.9282	0.00092863	0.0393834
ctg5-74513377-74513579	BosBovB	+	3	84.7569	92.6219	75.0769	17.545	1.49417e-05	0.014777
ctg5-74553612-74554072	BosBovB	-	6	71.4437	78.869	62.2526	16.6164	0.000580014	0.032187
ctg5-75218813-75219264	BosBovB	+	5	86.0242	93.1144	77.3069	15.8075	5.9973e-05	0.0184022
ctg5-75375462-75375625	BosBovB	-	5	78.9328	87.5011	68.5008	19.0004	5.9973e-05	0.0184022
ctg5-75393746-75394028	BosL1A3	-	4	15.7495	7.56151	25.8426	-18.2811	0.00103778	0.0393834
ctg5-76063178-76063580	BosL1B	-	3	73.1921	82.8469	60.7997	22.0472	0.000858483	0.0368467
ctg5-76139601-76141165	BosL1A3	-	7	83.3612	88.1008	77.8674	10.2334	0.000580014	0.032187
ctg5-76186474-76188316	BosL1A6	+	7	84.4377	90.4276	77.0407	13.3869	1.49417e-05	0.014777
ctg5-76211132-76211638	BosBovB	-	4	81.9147	87.2767	75.5587	11.7181	0.000311152	0.0262875
ctg5-76406416-76409627	BosBovB	-	13	74.3874	79.1881	68.2238	10.9643	0.00178879	0.0484939
ctg5-76579523-76581123	BosL1B	+	5	74.6563	79.7597	68.4746	11.2852	0.00149782	0.0450387
ctg5-76893986-76895290	BosL1A6	+	4	78.5255	83.4089	72.5317	10.8772	0.00178879	0.0484939
ctg5-78740514-78740635	BosBovB	-	3	75.7185	89.2247	59.6701	29.5546	0.000250089	0.0249233
ctg5-79993363-79993771	BosL1B	-	3	82.5185	89.0721	75.2806	13.7916	4.62101e-05	0.017501
ctg5-81640380-81640648	BosBovB	+	7	81.9059	89.4807	72.4612	17.0194	5.9973e-05	0.0184022
ctg5-82602966-82604502	BosBovB	+	18	91.8008	96.5379	86.075	10.4629	0.000311152	0.0262875
ctg5-82775010-82775138	BosBovB	+	5	81.5087	94.9871	65.3292	29.6579	0.000375875	0.028234
ctg5-82988740-82989479	BosBovB	+	5	82.8894	91.4876	71.7532	19.7345	0.000311152	0.0262875
ctg5-83012095-83013184	BosL1B	-	16	61.6779	57.0108	67.701	-10.6902	0.00103778	0.0393834
ctg5-84302656-84304354	BosBovB	-	6	81.7305	76.9631	87.3201	-10.357	0.00126597	0.0424657
ctg5-87879521-87880024	BosBovB	-	9	83.5767	90.0924	75.5416	14.5508	0.000580014	0.032187
ctg5-90745025-90745111	BosBovB	+	5	88.4732	93.2061	82.7877	10.4184	0.00171346	0.0484939
ctg5-90837080-90837519	BosL1A5	+	3	78.1226	87.1279	67.8541	19.2739	0.0013664	0.0450387
ctg5-92416845-92418301	BosBovB	-	4	63.3135	72.7667	51.9356	20.8311	0.00115578	0.0422702
ctg5-92554893-92555779	BosL1B	-	8	65.5251	70.1882	59.9853	10.203	0.00124915	0.0422702
ctg5-92681249-92682186	BosL1B	-	4	66.917	71.6397	61.2115	10.4282	0.000250236	0.0249233
ctg5-94116152-94116287	BosBovB	+	6	82.6654	94.7262	67.2258	27.5004	0.00123425	0.0422702
ctg5-94124314-94124472	BosBovB	+	6	78.5515	85.7372	69.6864	16.0508	2.67594e-05	0.0161846
ctg5-95280475-95281871	BosL1B	-	4	89.0315	95.8977	80.5808	15.3169	0.000488955	0.0309333
ctg5-95485715-95486751	BosBovB	-	10	87.2824	91.8214	81.6671	10.1543	0.00178879	0.0484939
ctg5-95734509-95735324	BosBovB	-	7	63.7857	68.8246	57.9363	10.8882	0.00103778	0.0393834
ctg5-95818746-95820063	BosL1A6	+	6	58.4237	65.561	50.0177	15.5433	0.000580014	0.032187
ctg5-96527131-96528854	BosBovB	+	6	79.014	84.249	72.5014	11.7476	0.000200254	0.0236464
ctg5-96861617-96861893	BosL1B	+	4	82.0482	92.7765	70.3942	22.3823	0.00136453	0.0450387
ctg5-97205757-97206047	BosL1B	-	3	31.022	21.8946	42.8806	-20.9859	0.00038477	0.028234
ctg5-97583242-97583443	BosBovB	-	6	89.1688	94.7331	82.3537	12.3794	0.00038477	0.028234
ctg5-97945619-97945820	BosL1B	-	4	90.2431	95.8742	83.3125	12.5617	0.000250236	0.0249233
ctg5-98026490-98026825	BosL1B	+	3	46.9425	36.6396	59.6231	-22.9835	2.67594e-05	0.0161846
ctg5-98989341-98989522	BosL1A6	+	3	83.8891	92.201	73.659	18.5421	0.000322675	0.0271636
ctg5-98989364-98989523	BosL1B	+	3	83.8891	92.201	73.659	18.5421	0.000322675	0.0271636
ctg5-99148454-99149165	BosL1A6	+	4	73.4306	79.6617	65.7615	13.9002	0.000580014	0.032187
ctg5-99261738-99262166	BosBovB	+	3	79.8631	84.2917	74.2333	10.0585	0.00103778	0.0393834
ctg5-99589731-99590110	BosBovB	+	6	83.8972	89.7931	76.9564	12.8367	0.000707298	0.0344551
ctg5-99608459-99608627	BosBovB	+	3	81.2912	87.5777	73.9256	13.6521	0.00149782	0.0450387
ctg5-99706506-99706791	BosBovB	+	3	81.4034	86.492	75.1469	11.3451	0.00117239	0.0422702
ctg5-99999549-99999686	BosBovB	-	7	21.1523	8.23115	37.5195	-29.2884	3.52765e-05	0.0168683
ctg5-100165196-100166375	BosL1B	+	5	14.8675	4.71717	27.2015	-22.4844	0.000200254	0.0236464
ctg5-100168507-100169190	BosBovB	+	8	28.5019	16.5727	42.8946	-26.3219	2.67594e-05	0.0161846
ctg5-100169302-100170208	BosBovB	-	6	16.5315	7.74472	27.1327	-19.388	0.000311152	0.0262875
ctg5-100170677-100173226	BosL1B	-	7	15.1697	6.48057	26.053	-19.5724	0.000311152	0.0262875
ctg5-100190949-100191409	BosBovB	+	5	87.993	93.2615	81.3993	11.8621	1.49417e-05	0.014777
ctg5-100516748-100517286	BosBovB	-	3	87.1466	92.2022	80.8146	11.3875	0.00171346	0.0484939
ctg5-101400231-101401109	BosBovB	-	4	82.9939	89.4914	74.9487	14.5427	5.9973e-05	0.0184022
ctg5-101638636-101639277	BosBovB	+	7	86.6446	93.2048	79.2607	13.9441	0.00103778	0.0393834
ctg5-101677002-101677793	BosL1A8	+	4	85.9746	92.0102	78.5175	13.4927	0.00184607	0.0497498
ctg5-101930738-101931685	BosBovB	+	3	43.3649	37.574	50.4923	-12.9183	2.80844e-05	0.0167972
ctg5-101965628-101966238	BosBovB	-	4	82.2014	87.811	75.2929	12.5181	0.00092863	0.0393834
ctg5-101989283-101989447	BosL1A6	-	3	69.8207	77.1781	60.7654	16.4127	0.00015926	0.0223249
ctg5-102038864-102040049	BosBovB	-	11	84.9309	89.6524	78.6766	10.9758	0.000707298	0.0344551
ctg5-102112824-102114628	BosBovB	-	6	61.8477	66.6193	56.0835	10.5359	0.000707298	0.0344551
ctg5-102171485-102172101	BosBovB	+	4	78.522	83.8484	71.9663	11.8821	0.000473624	0.0303043
ctg5-102294285-102295400	BosL1B	-	9	72.164	77.7434	66.1936	11.5498	0.00124915	0.0422702
ctg5-102463949-102465363	BosBovB	+	4	74.931	81.0729	67.2811	13.7918	0.00103778	0.0393834
ctg5-102551749-102551972	BosBovB	+	3	73.7816	80.9954	65.0191	15.9763	0.000126017	0.0210476
ctg5-102589106-102590041	BosBovB	+	4	67.9658	74.4899	60.2997	14.1902	0.00124915	0.0422702
ctg5-102590031-102590784	BosBovB	+	4	67.8625	73.0668	61.9285	11.1383	9.90217e-05	0.0201357
ctg5-102674701-102675115	BosBovB	+	3	69.519	76.7895	61.4692	15.3203	0.000311152	0.0262875
ctg5-103123319-103123565	BosBovB	+	3	82.0445	86.9444	76.1607	10.7837	0.000707298	0.0344551
ctg5-103356231-103357304	BosBovB	+	10	85.3005	90.4944	79.1125	11.3819	8.01604e-06	0.0139836
ctg5-103701870-103702580	BosL1B	-	5	73.1113	82.1959	61.7882	20.4078	0.000200254	0.0236464
ctg5-104087959-104088402	BosL1A3	-	3	87.3686	94.4969	78.5135	15.9834	0.000844576	0.0368467
ctg5-104381748-104381916	BosL1B	-	4	14.0112	1.35312	29.5904	-28.2373	0.000423444	0.0303043
ctg5-105430261-105431223	BosBovB	+	5	75.9354	81.5242	69.6412	11.883	1.97454e-06	0.0126103
ctg5-105931509-105932635	BosL1B	-	3	23.6766	12.8604	37.4637	-24.6033	0.000200254	0.0236464
ctg5-107041086-107041199	BosL1B	+	3	80.4914	92.771	65.8671	26.9038	0.000667008	0.0344551
ctg5-107192894-107193510	BosL1B	+	3	76.042	82.524	68.0641	14.4599	0.00178879	0.0484939
ctg5-107472322-107472788	BosBovB	-	6	77.2422	72.1824	83.4628	-11.2804	0.00124915	0.0422702
ctg5-108277478-108277779	BosBovB	-	8	38.8472	23.5615	57.2009	-33.6394	0.00178879	0.0484939
ctg5-108643349-108643990	BosL1B	-	3	84.569	89.5875	78.3923	11.1952	0.000858483	0.0368467
ctg5-108810468-108811686	BosBovB	-	15	84.9883	89.7835	79.099	10.6845	0.00103778	0.0393834
ctg5-108959308-108959755	BosBovB	-	5	86.6521	91.7065	80.6562	11.0503	5.46107e-05	0.0184022
ctg5-109150194-109150384	BosL1A1	+	4	38.2228	24.2875	55.374	-31.0865	0.00038477	0.028234
ctg5-109347330-109347838	BosBovB	-	4	85.8909	94.1672	75.7048	18.4624	4.09643e-06	0.0139836
ctg5-109664068-109665672	BosBovB	-	18	80.4414	85.187	74.6626	10.5244	0.000126017	0.0210476
ctg5-109825004-109825556	BosL1A5	+	6	86.8644	94.0177	78.0603	15.9575	0.000250089	0.0249233
ctg5-110029476-110030678	BosBovB	-	4	80.8725	88.9075	71.1344	17.773	0.00178879	0.0484939
ctg5-110463091-110463188	BosBovB	+	3	80.3042	87.8275	71.3897	16.4378	0.00103778	0.0393834
ctg5-110765761-110765903	BosBovB	+	6	80.8578	93.4677	65.3378	28.1299	0.000575562	0.032187
ctg5-111301165-111301583	BosBovB	-	4	87.5822	94.4538	79.0745	15.3793	0.00149782	0.0450387
ctg5-111543478-111543547	BosBovB	+	7	43.4131	29.2848	60.8016	-31.5168	0.00149782	0.0450387
ctg5-111706461-111706555	BosBovB	+	5	80.6366	89.8406	69.3085	20.5322	0.000250236	0.0249233
ctg5-112069189-112069386	BosBovB	+	7	91.8308	96.9991	85.466	11.5331	7.73607e-05	0.0192534
ctg5-113275512-113275699	BosBovB	+	7	85.2991	91.3777	77.6565	13.7211	0.000707298	0.0344551
ctg5-113675348-113675774	BosBovB	+	9	88.8171	93.8206	82.6095	11.2111	0.00149782	0.0450387
ctg5-113857243-113857741	BosL1A6	+	9	89.9968	95.197	83.6726	11.5243	2.67594e-05	0.0161846
ctg5-114695575-114696080	BosBovB	-	11	37.0957	41.9397	31.3799	10.5598	0.000311152	0.0262875
ctg5-114742687-114743037	BosL1B	-	5	72.407	66.9063	78.9031	-11.9967	0.00124915	0.0422702
ctg5-115113311-115113426	BosL1A8	-	4	76.3284	88.5828	61.2462	27.3367	0.00124915	0.0422702
ctg5-116317461-116317571	BosBovB	-	6	81.2785	93.8576	66.1191	27.7385	7.21215e-05	0.0192534
ctg5-116396583-116397164	BosBovB	-	10	86.0671	94.8566	75.2492	19.6073	0.000200254	0.0236464
ctg5-116707203-116707367	BosBovB	+	8	81.2478	88.6312	72.0171	16.6141	0.000200254	0.0236464
ctg5-117375214-117375453	BosL1B	-	6	81.1861	87.5586	73.9096	13.649	2.00696e-05	0.0154155
ctg5-117490649-117491154	BosL1B	+	9	58.0007	65.253	49.0227	16.2303	0.000473624	0.0303043
ctg5-117840181-117841810	BosBovB	-	7	80.0607	85.097	74.4939	10.6031	1.09926e-05	0.0145334
ctg5-117878275-117878885	BosL1B	+	11	77.1407	83.4953	69.0231	14.4722	0.000707298	0.0344551
ctg5-118652100-118652706	BosBovB	-	6	78.6003	88.4917	66.4263	22.0654	0.00103778	0.0393834
ctg5-118791627-118791829	BosBovB	+	5	74.9998	83.8173	64.1198	19.6975	5.9973e-05	0.0184022
ctg5-119182362-119182727	BosL1B	-	5	78.4735	83.4614	72.4354	11.026	0.000707298	0.0344551
ctg5-119394315-119394528	BosBovB	+	9	87.4511	92.9825	80.5623	12.4202	0.00103778	0.0393834
ctg5-119399608-119400549	BosBovB	-	7	80.5545	86.8673	72.9258	13.9415	0.00103778	0.0393834
ctg5-119400748-119401662	BosL1B	-	15	85.9323	93.731	77.3957	16.3353	2.00696e-05	0.0154155
ctg5-119502583-119503449	BosL1B	+	12	77.5525	85.844	67.7242	18.1198	0.00103778	0.0393834
ctg5-119686220-119686413	BosL1B	+	3	18.3988	3.81354	36.8265	-33.013	0.000724081	0.0352272
ctg5-119936506-119937500	BosBovB	-	5	83.4707	90.967	74.2538	16.7132	0.00103778	0.0393834
ctg5-120076504-120078052	BosBovB	-	5	63.851	70.3055	56.3792	13.9262	3.52765e-05	0.0168683
ctg6-308902-310294	BosL1A3	-	4	66.5582	72.8764	59.2891	13.5873	2.67594e-05	0.0161846
ctg6-453047-456856	BosL1B	+	7	59.9464	65.4632	53.1965	12.2667	0.000858483	0.0368467
ctg6-485080-485824	BosL1B	-	5	62.7415	67.2428	56.8306	10.4122	0.00181226	0.0490913
ctg6-496829-498298	BosL1A2	+	7	63.5898	68.1986	57.6759	10.5226	0.00103778	0.0393834
ctg6-603533-604535	BosBovB	-	3	65.7181	71.426	57.9332	13.4928	0.00184367	0.0497498
ctg6-648281-649314	BosBovB	+	3	56.1069	64.1188	46.2462	17.8726	0.000858483	0.0368467
ctg6-663207-664028	BosL1A3	-	6	71.4323	76.0457	65.9616	10.0841	0.00149782	0.0450387
ctg6-695138-696011	BosBovB	+	7	44.091	51.9176	34.5225	17.3951	0.00149782	0.0450387
ctg6-988914-990915	BosBovB	+	4	67.9685	73.021	61.4519	11.5691	0.00124915	0.0422702
ctg6-1189965-1191683	BosBovB	+	5	52.9251	60.0719	44.1182	15.9537	0.00103778	0.0393834
ctg6-1368699-1370939	BosL1B	+	5	56.6774	62.1608	49.9361	12.2247	5.9973e-05	0.0184022
ctg6-1394712-1396792	BosBovB	-	7	53.7284	58.7424	47.6333	11.109	0.000473624	0.0303043
ctg6-1427093-1429625	BosBovB	+	7	69.4729	74.704	63.1036	11.6004	0.00092863	0.0393834
ctg6-1607751-1608965	BosBovB	+	7	67.2216	72.5955	60.7069	11.8885	0.00149782	0.0450387
ctg6-1704848-1706504	BosL1A6	-	3	69.853	74.9964	63.7308	11.2656	0.000580014	0.032187
ctg6-2061303-2061963	BosBovB	-	4	71.5904	78.9213	62.766	16.1554	0.00184607	0.0497498
ctg6-2134300-2134845	BosL1B	+	9	83.425	88.6638	76.7983	11.8654	0.00178879	0.0484939
ctg6-2180122-2180685	BosBovB	+	5	74.9554	81.2504	67.1292	14.1213	0.00103778	0.0393834
ctg6-2438136-2438358	BosL1B	+	4	53.5054	61.2302	44.0408	17.1894	0.00038477	0.028234
ctg6-2785792-2786976	BosBovB	-	5	60.322	65.7285	53.4655	12.263	0.000473624	0.0303043
ctg6-3560354-3560803	BosL1B	+	5	90.6885	96.5781	83.4095	13.1686	0.000676282	0.0344551
ctg6-3562235-3562711	BosBovB	-	3	84.65	94.1959	73.0987	21.0972	0.00103778	0.0393834
ctg6-4543092-4543328	BosL1B	-	5	80.2262	91.432	69.0328	22.3992	0.00183285	0.049578
ctg6-4789665-4789959	BosL1A6	+	3	75.8244	85.5646	63.7629	21.8016	1.32618e-06	0.0126103
ctg6-4826364-4826527	BosBovB	+	3	82.5278	87.0353	77.0141	10.0212	0.00117097	0.0422702
ctg6-5601846-5602671	BosL1A3	+	14	80.0171	84.7503	73.9153	10.835	2.67594e-05	0.0161846
ctg6-6035597-6036208	BosBovB	-	5	68.6754	61.2131	77.5841	-16.371	0.000250236	0.0249233
ctg6-6195785-6196824	BosBovB	-	10	82.3577	92.6826	69.6305	23.0521	0.00038477	0.028234
ctg6-6226564-6226631	BosBovB	-	3	76.9899	89.0784	62.6587	26.4196	0.000250236	0.0249233
ctg6-6496056-6497062	BosBovB	-	7	85.5069	94.5449	74.7975	19.7474	0.00103778	0.0393834
ctg6-6528674-6528764	BosL1A3	+	3	91.7151	97.0522	84.5308	12.5214	0.00151139	0.0454142
ctg6-7093276-7094160	BosL1B	-	3	74.3056	81.1453	65.4897	15.6556	0.000126017	0.0210476
ctg6-7331185-7333874	BosBovB	+	10	68.2663	74.3579	60.8924	13.4655	0.000126017	0.0210476
ctg6-7544561-7544803	BosBovB	-	3	76.6211	81.1667	70.7187	10.448	0.00149782	0.0450387
ctg6-7593405-7593685	BosBovB	-	4	85.7293	90.6639	79.7971	10.8667	0.000858483	0.0368467
ctg6-7640970-7643641	BosBovB	+	9	73.1293	77.6909	67.61	10.0809	0.000707298	0.0344551
ctg6-7841920-7845877	BosL1A3	+	14	69.3372	74.0793	63.4828	10.5965	0.000126017	0.0210476
ctg6-7939554-7942564	BosL1A3	+	10	60.1556	65.4725	53.6538	11.8186	5.9973e-05	0.0184022
ctg6-9281515-9282329	BosL1A6	-	5	69.3343	74.4907	63.5139	10.9768	0.00103778	0.0393834
ctg6-9432832-9434242	BosL1B	+	4	68.2303	75.4713	59.9635	15.5078	0.00124915	0.0422702
ctg6-9561982-9564469	BosBovB	-	4	57.113	62.6096	50.1701	12.4396	0.000580014	0.032187
ctg6-10577639-10578536	BosBovB	-	3	59.7034	66.8147	52.0718	14.7429	0.00178879	0.0484939
ctg6-11930592-11931029	BosBovB	-	3	37.9775	31.8531	45.4205	-13.5674	0.00171346	0.0484939
ctg6-14288838-14291075	BosL1A8	+	4	70.3462	77.5386	62.7547	14.7839	9.90217e-05	0.0201357
ctg6-15145390-15145722	BosBovB	+	4	86.1362	91.3081	79.7228	11.5853	5.9973e-05	0.0184022
ctg6-15176346-15177180	BosL1A3	-	8	77.6871	88.304	65.6431	22.6608	2.85866e-06	0.0138096
ctg6-15698286-15699110	BosL1B	-	8	89.2149	96.3689	80.7384	15.6305	5.74679e-06	0.0139836
ctg6-15932627-15932760	BosBovB	+	3	87.8544	93.1816	81.5575	11.6241	5.99431e-05	0.0184022
ctg6-16180023-16180063	BosBovB	+	3	85.0259	92.4832	76.5731	15.9101	0.000126017	0.0210476
ctg6-17081752-17081794	BosBovB	+	3	64.0443	56.874	72.8692	-15.9953	0.00103778	0.0393834
ctg6-17337470-17338406	BosBovB	+	9	80.5635	87.713	71.5837	16.1294	0.00092863	0.0393834
ctg6-17468449-17469094	BosBovB	+	3	82.1024	87.486	75.483	12.003	0.00142132	0.0450387
ctg6-19758344-19762123	BosL1A1	+	7	73.5824	68.268	79.7182	-11.4502	9.90217e-05	0.0201357
ctg6-22476972-22477753	BosBovB	+	8	85.7222	94.079	75.5577	18.5213	0.000148393	0.0223249
ctg6-22489705-22490076	BosBovB	+	7	85.5442	94.5495	74.7413	19.8082	2.00696e-05	0.0154155
ctg6-24525379-24525673	BosL1B	+	4	85.8585	91.4466	78.9338	12.5127	4.62101e-05	0.017501
ctg6-24607988-24609320	BosBovB	-	8	59.8311	65.8039	52.0858	13.7181	0.00124915	0.0422702
ctg6-26663110-26663839	BosBovB	-	4	75.3089	80.2346	68.9982	11.2364	0.00124915	0.0422702
ctg6-27581101-27582286	BosL1B	-	9	70.781	75.7473	65.1397	10.6076	0.000858483	0.0368467
ctg6-28982264-28982845	BosBovB	-	5	79.6189	85.769	72.3768	13.3922	0.00124915	0.0422702
ctg6-29851360-29851596	BosBovB	-	6	59.7484	54.5377	65.6881	-11.1505	0.00103778	0.0393834
ctg6-30218751-30219165	BosL1A3	+	4	73.8797	81.6464	64.7243	16.9221	0.00103778	0.0393834
ctg6-30947343-30947382	BosBovB	+	3	71.4292	83.5289	57.4679	26.0609	8.35422e-05	0.0201357
ctg6-31674104-31675832	BosL1A3	+	5	66.3175	71.5282	59.8669	11.6613	0.000311152	0.0262875
ctg6-31857685-31858878	BosBovB	-	3	65.8086	70.4021	60.1551	10.247	0.00015926	0.0223249
ctg6-36304790-36305497	BosL1B	-	3	52.5172	40.4062	67.4231	-27.0168	0.00103778	0.0393834
ctg6-36542075-36542551	BosBovB	+	7	89.5984	94.408	83.7187	10.6893	2.31287e-05	0.0161846
ctg6-37062156-37063064	BosL1B	+	8	81.256	88.128	72.7978	15.3302	0.000473624	0.0303043
ctg6-37153393-37153948	BosL1B	-	3	89.2114	94.4977	83.3897	11.1079	2.67594e-05	0.0161846
ctg6-38366377-38366625	BosL1A6	-	4	68.0917	76.5465	57.7506	18.7959	0.00124915	0.0422702
ctg6-40944045-40945464	BosBovB	-	4	81.0268	86.6427	74.3156	12.3271	0.000200254	0.0236464
ctg6-41012486-41013161	BosL1B	+	5	67.6934	72.705	61.5254	11.1796	0.000580014	0.032187
ctg6-41336654-41336877	BosBovB	+	3	53.0805	58.75	46.1026	12.6474	0.00015926	0.0223249
ctg6-43337015-43338443	BosBovB	-	3	77.002	83.373	69.7974	13.5756	0.000707298	0.0344551
ctg6-44412967-44413514	BosBovB	+	6	71.6578	65.8753	79.9374	-14.0622	0.000250089	0.0249233
ctg6-50607482-50608590	BosBovB	+	4	78.3867	86.002	68.526	17.476	0.000200254	0.0236464
ctg6-52117566-52118079	BosL1B	+	3	63.9112	69.8317	57.0044	12.8273	0.00068698	0.0344551
ctg6-52367120-52368275	BosBovB	+	5	56.7158	62.6165	49.4323	13.1843	0.00015926	0.0223249
ctg6-55378889-55379852	BosL1B	-	5	76.4224	83.3512	67.5264	15.8249	1.49417e-05	0.014777
ctg6-56362579-56364361	BosBovB	+	4	75.887	80.6096	70.4143	10.1953	0.000858483	0.0368467
ctg6-57235836-57236243	BosBovB	-	9	67.1688	58.4877	77.865	-19.3772	0.000580014	0.032187
ctg6-58466027-58466632	BosBovB	-	6	88.033	93.3319	81.2657	12.0663	0.00149782	0.0450387
ctg6-58868033-58869178	BosBovB	+	9	88.732	94.2458	81.3949	12.8509	5.9973e-05	0.0184022
ctg6-62400077-62400888	BosBovB	-	3	71.2026	78.4063	61.4185	16.9878	0.00038477	0.028234
ctg6-62508422-62509507	BosBovB	-	4	61.668	68.1459	53.6502	14.4957	0.00178879	0.0484939
ctg6-62733491-62734534	BosBovB	-	5	76.4026	81.2357	70.6658	10.5699	0.00092863	0.0393834
ctg6-62771958-62772390	BosL1A2	-	6	76.816	83.5397	68.4804	15.0593	1.32618e-06	0.0126103
ctg6-65650525-65651946	BosBovB	+	10	65.8899	70.4412	60.2687	10.1726	0.000580014	0.032187
ctg6-65699672-65700197	BosBovB	-	3	77.7594	83.4729	70.971	12.5019	0.000707298	0.0344551
ctg6-65894839-65896110	BosBovB	-	5	66.7211	72.963	59.3151	13.648	0.00171346	0.0484939
ctg6-66655297-66655774	BosBovB	+	9	87.2118	92.1876	80.8315	11.3561	0.00178879	0.0484939
ctg6-66961688-66962232	BosL1B	+	3	80.8893	87.0028	73.4803	13.5225	0.000793191	0.0368467
ctg6-68117690-68117742	BosBovB	-	4	90.3198	97.5486	82.4346	15.114	0.000241392	0.0249233
ctg6-68319878-68321162	BosL1A3	+	6	54.2202	45.9814	64.2335	-18.2522	0.000200254	0.0236464
ctg6-69565618-69565757	BosBovB	-	5	82.8266	90.5225	73.3546	17.1679	2.00696e-05	0.0154155
ctg6-69716561-69717106	BosBovB	+	5	85.2069	91.0422	78.0554	12.9868	0.000250236	0.0249233
ctg6-69791529-69792001	BosBovB	+	4	69.1344	74.2514	62.6927	11.5587	0.000858483	0.0368467
ctg6-70441657-70442065	BosL1B	-	4	15.175	3.65427	29.4458	-25.7916	0.00017017	0.0236464
ctg6-70794897-70795273	BosL1A6	+	3	84.1958	95.0878	71.0846	24.0032	5.9973e-05	0.0184022
ctg6-71156974-71157560	BosBovB	+	5	44.3123	35.9382	54.3408	-18.4026	0.00178879	0.0484939
ctg6-71593605-71594687	BosBovB	-	5	53.0318	48.0389	59.1781	-11.1392	0.00124915	0.0422702
ctg6-71797704-71797777	BosBovB	+	3	63.6469	74.0253	51.0346	22.9907	0.000707298	0.0344551
ctg6-72724016-72724570	BosL1B	-	4	81.8065	90.3078	71.3433	18.9645	0.000311152	0.0262875
ctg6-73938722-73938904	BosL1A3	-	3	76.4437	84.5667	66.4462	18.1205	4.62101e-05	0.017501
ctg6-74265232-74266450	BosBovB	-	7	64.6413	69.426	59.0395	10.3865	0.000580014	0.032187
ctg6-74302527-74303069	BosL1B	+	3	69.5578	75.1944	62.8295	12.365	0.000311152	0.0262875
ctg6-75808199-75809323	BosBovB	+	3	48.0411	53.3079	42.7581	10.5498	0.00100411	0.0393834
ctg6-77838524-77840979	BosBovB	+	14	59.8567	65.1679	53.2678	11.9001	0.000473624	0.0303043
ctg6-78673054-78674696	BosL1B	-	3	64.0037	68.7067	58.22	10.4867	0.00149782	0.0450387
ctg6-80588768-80589391	BosBovB	+	3	48.903	54.0353	42.6449	11.3904	0.000858483	0.0368467
ctg6-83177562-83178672	BosBovB	+	6	74.1466	68.6133	80.5049	-11.8916	0.00178879	0.0484939
ctg6-83429599-83430888	BosL1A3	-	24	69.598	75.376	62.2265	13.1495	5.9973e-05	0.0184022
ctg6-84231217-84233181	BosBovB	+	3	69.8939	74.624	63.9828	10.6411	0.000412587	0.0301142
ctg6-85112157-85112281	BosL1A8	+	3	90.8264	96.07	85.3246	10.7454	0.000391908	0.0287298
ctg6-85537091-85537345	BosBovB	+	9	86.2243	91.2788	80.1327	11.146	0.00149782	0.0450387
ctg6-85552894-85553937	BosBovB	+	8	61.0151	66.2367	54.8662	11.3705	0.000473624	0.0303043
ctg6-85584613-85584738	BosBovB	-	10	84.4377	90.9463	76.5926	14.3537	0.00124915	0.0422702
ctg6-85650426-85651469	BosBovB	+	9	73.6638	80.7943	65.1729	15.6214	0.00015926	0.0223249
ctg6-87236472-87237316	BosL1B	+	4	75.8035	81.1659	69.2755	11.8904	0.00015926	0.0223249
ctg6-87977018-87977802	BosBovB	+	3	72.4706	77.8677	65.9979	11.8699	7.73607e-05	0.0192534
ctg6-89745980-89746427	BosBovB	-	7	81.4495	90.7171	71.2779	19.4392	0.000126017	0.0210476
ctg6-90502592-90502895	BosL1A2	-	4	72.1962	77.7074	65.7058	12.0017	0.00103778	0.0393834
ctg6-90526826-90526945	BosBovB	-	5	85.0564	97.2562	70.4523	26.8039	9.30528e-05	0.0201357
ctg6-90720720-90721825	BosBovB	-	8	66.8165	61.4592	73.191	-11.7318	0.00124915	0.0422702
ctg6-91816839-91817386	BosL1B	+	5	89.5666	94.3137	83.7238	10.5899	0.000250236	0.0249233
ctg6-92489854-92490588	BosL1B	+	3	84.4539	91.3661	75.9436	15.4225	0.000473624	0.0303043
ctg6-93386468-93386881	BosL1B	+	4	44.1723	31.4609	60.2012	-28.7403	0.000126017	0.0210476
ctg6-93488164-93488857	BosBovB	+	6	46.2602	37.1437	58.1181	-20.9744	0.000858436	0.0368467
ctg6-94153263-94154756	BosBovB	-	5	79.7771	85.7389	72.6322	13.1067	0.000473624	0.0303043
ctg6-94168663-94169426	BosBovB	-	3	82.521	87.1655	77.0641	10.1014	0.000200254	0.0236464
ctg6-94770025-94772224	BosL1B	+	11	86.9842	92.3477	80.3081	12.0396	4.62101e-05	0.017501
ctg6-94840888-94841369	BosBovB	-	3	86.2891	92.7811	78.4489	14.3322	5.99431e-05	0.0184022
ctg6-97236086-97237006	BosBovB	+	9	74.7349	68.1556	82.8353	-14.6797	0.00124915	0.0422702
ctg6-97261262-97261641	BosBovB	-	5	76.4707	84.2554	67.3549	16.9005	0.00038477	0.028234
ctg6-97470474-97470606	BosL1B	+	3	73.4681	87.219	56.472	30.747	7.73607e-05	0.0192534
ctg6-97575784-97576139	BosL1B	+	4	53.5881	45.2145	63.8048	-18.5903	2.00696e-05	0.0154155
ctg6-98346652-98346782	BosBovB	+	4	76.0685	87.9992	61.3846	26.6146	0.000200254	0.0236464
ctg6-98633139-98633383	BosL1A8	-	5	84.7592	91.6014	77.1726	14.4288	0.000676282	0.0344551
ctg6-99092491-99093166	BosBovB	+	3	82.0019	89.5219	73.7436	15.7783	9.90217e-05	0.0201357
ctg6-99151294-99151810	BosL1B	-	3	89.2765	96.5428	81.0363	15.5065	0.000652757	0.0344551
ctg6-99227678-99227935	BosBovB	-	4	86.5419	92.5792	79.6282	12.951	0.00038477	0.028234
ctg6-99677333-99677512	BosBovB	-	4	77.5211	70.9906	85.5587	-14.568	0.000250236	0.0249233
ctg6-100736060-100736156	BosBovB	+	6	78.2471	85.6287	69.3808	16.248	0.00149782	0.0450387
ctg6-101347999-101349334	BosBovB	+	7	82.375	87.9634	75.6766	12.2868	0.000580014	0.032187
ctg6-102100229-102100487	BosL1B	-	3	45.6756	34.9219	60.0266	-25.1047	0.000250236	0.0249233
ctg6-102735031-102736679	BosBovB	-	4	76.5659	81.8812	70.2317	11.6496	0.00038477	0.028234
ctg6-102995276-102997362	BosBovB	+	5	78.981	84.5138	72.239	12.2748	0.000250236	0.0249233
ctg6-103864637-103865907	BosBovB	+	8	71.7781	78.5598	63.3689	15.191	0.00149782	0.0450387
ctg6-103897064-103897489	BosL1B	-	4	76.3042	81.6492	69.9654	11.6838	0.00178879	0.0484939
ctg6-104020435-104020877	BosBovB	-	3	73.0131	77.476	67.1281	10.348	0.00149782	0.0450387
ctg6-104054840-104055454	BosBovB	-	3	68.6574	74.2643	61.7449	12.5194	0.00038477	0.028234
ctg6-104410125-104410546	BosL1A5	-	3	85.0273	90.6642	78.3873	12.277	0.000311152	0.0262875
ctg6-104527630-104527741	BosL1A3	-	3	88.2374	94.2698	80.8128	13.457	0.000311152	0.0262875
ctg6-105531548-105533064	BosBovB	-	5	55.8018	47.1346	66.8583	-19.7237	0.000311152	0.0262875
ctg6-105928248-105929260	BosBovB	-	4	81.848	86.9647	75.5154	11.4494	0.000250236	0.0249233
ctg6-105970803-105971874	BosBovB	-	3	74.2169	81.7067	65.3654	16.3414	0.000707298	0.0344551
ctg6-106592659-106592855	BosL1B	+	3	32.8831	22.2148	44.6256	-22.4109	0.00149782	0.0450387
ctg6-106633338-106634199	BosBovB	+	7	44.731	32.9645	59.0324	-26.0679	0.000707298	0.0344551
ctg6-107834803-107835846	BosBovB	-	5	72.4562	77.3703	66.7595	10.6108	0.000473624	0.0303043
ctg6-108528691-108529650	BosBovB	+	4	83.8832	88.75	77.5394	11.2106	0.000473624	0.0303043
ctg6-109609538-109609654	BosBovB	+	4	84.6152	92.5642	74.1141	18.4501	2.00696e-05	0.0154155
ctg6-109957504-109959377	BosBovB	+	9	86.4206	91.228	80.4298	10.7982	0.000311152	0.0262875
ctg6-110430018-110431106	BosBovB	+	10	79.6357	84.7347	73.5898	11.1449	0.000126017	0.0210476
ctg6-110520273-110520516	BosL1B	+	3	15.6887	3.14359	30.4562	-27.3126	0.000724081	0.0352272
ctg6-111066158-111067431	BosBovB	-	9	86.8539	93.5655	78.4475	15.118	4.09643e-06	0.0139836
ctg6-111436299-111436730	BosBovB	-	4	84.0624	92.7274	73.0004	19.727	0.00158966	0.0475045
ctg6-111585427-111585733	BosL1A6	+	3	87.291	94.8554	77.3152	17.5402	0.00035632	0.028234
ctg6-111688819-111689205	BosL1B	+	6	82.0405	88.9671	73.5026	15.4645	7.73607e-05	0.0192534
ctg6-111971331-111971372	BosBovB	-	4	88.1992	97.1569	77.5401	19.6169	0.000152041	0.0223249
ctg6-112088375-112088471	BosL1B	-	3	77.0102	90.4342	60.3944	30.0397	0.000200254	0.0236464
ctg6-112625726-112626842	BosBovB	+	6	82.0741	86.7443	76.5044	10.24	0.000580014	0.032187
ctg6-113162403-113165838	BosL1A3	+	33	82.4408	87.5289	76.2001	11.3289	3.52765e-05	0.0168683
ctg6-113276182-113276696	BosBovB	-	3	84.3626	94.775	71.5474	23.2276	4.97299e-05	0.0184022
ctg6-113379785-113381087	BosBovB	-	13	54.914	44.3181	67.7519	-23.4338	0.000858483	0.0368467
ctg6-113534437-113536078	BosL1B	+	19	89.2574	95.0673	81.8706	13.1967	5.9973e-05	0.0184022
ctg6-114145665-114145710	BosBovB	-	4	34.6358	18.0031	55.1067	-37.1036	0.000311152	0.0262875
ctg6-114558755-114559045	BosBovB	-	5	87.9462	94.3606	80.0515	14.3091	0.00038477	0.028234
ctg6-114695019-114696397	BosL1A6	+	10	91.5397	97.1359	84.6519	12.484	0.00038477	0.028234
ctg6-115201667-115201822	BosL1A2	-	3	80.5576	90.7521	67.7776	22.9745	0.000473624	0.0303043
ctg6-115240874-115241269	BosL1A3	+	3	88.184	95.6677	78.5213	17.1464	4.94116e-05	0.0184022
ctg6-115242437-115242539	BosBovB	-	3	84.3994	91.6219	74.7694	16.8524	0.000101835	0.0206632
ctg6-115313998-115314205	BosBovB	-	3	82.1085	89.4921	73.3545	16.1375	3.52765e-05	0.0168683
ctg6-115314242-115314295	BosBovB	+	3	72.408	81.4531	61.2756	20.1775	0.00178879	0.0484939
ctg6-115368979-115369611	BosBovB	+	9	86.0077	93.1767	77.0759	16.1008	0.00015926	0.0223249
ctg6-115434575-115434817	BosL1B	+	5	60.0649	64.6887	53.9689	10.7199	0.00103778	0.0393834
ctg6-115531837-115532282	BosL1B	+	11	78.6031	87.9576	66.9237	21.0338	0.000707298	0.0344551
ctg6-115925934-115926288	BosL1A1	+	5	64.6672	70.0962	57.9854	12.1109	0.00103778	0.0393834
ctg6-115974554-115974793	BosL1B	-	3	88.4598	93.4309	82.2841	11.1468	0.00017594	0.0236464
ctg6-116212570-116212681	BosL1B	-	6	87.1457	95.5694	77.009	18.5604	0.0012329	0.0422702
ctg6-116292865-116293130	BosL1B	+	9	84.9665	91.4022	77.3446	14.0576	0.000707298	0.0344551
ctg6-116343543-116344018	BosL1B	-	7	78.7362	83.9982	72.2599	11.7383	0.00149782	0.0450387
ctg6-116518918-116519229	BosL1A5	-	5	89.0248	93.6994	83.2715	10.4278	0.000473624	0.0303043
ctg6-116564016-116564088	BosBovB	-	4	69.6878	82.8047	53.5136	29.2911	0.000793191	0.0368467
ctg6-117441170-117441209	BosL1A6	-	6	91.8321	97.825	84.4951	13.3299	0.00011631	0.0210476
ctg6-117505854-117506175	BosBovB	+	9	67.8825	59.8494	77.8539	-18.0045	0.00103778	0.0393834
ctg7-134736-135515	BosL1A3	+	6	59.0779	64.252	53.3282	10.9238	0.000126017	0.0210476
ctg7-204943-205652	BosL1B	-	3	48.451	54.4654	41.5438	12.9216	0.00124915	0.0422702
ctg7-216801-217628	BosBovB	-	3	44.4427	51.6714	35.8564	15.815	9.48551e-05	0.0201357
ctg7-218732-219859	BosBovB	-	7	56.5051	61.948	50.2586	11.6894	0.00149782	0.0450387
ctg7-222489-223973	BosBovB	+	9	68.6125	73.5028	62.4739	11.0289	0.00103778	0.0393834
ctg7-252287-254274	BosBovB	-	5	50.4371	55.8546	44.0237	11.8309	0.00149782	0.0450387
ctg7-355694-356710	BosL1A6	+	5	73.8673	78.8108	67.2796	11.5312	0.000858483	0.0368467
ctg7-465741-466259	BosBovB	-	3	73.0015	80.5446	63.6404	16.9042	0.000473624	0.0303043
ctg7-479107-480815	BosBovB	+	6	78.278	82.889	72.6828	10.2062	0.00103778	0.0393834
ctg7-483495-485237	BosBovB	+	7	79.1452	84.4236	72.8714	11.5522	5.9973e-05	0.0184022
ctg7-723568-725585	BosL1B	+	4	74.4414	80.8266	66.5827	14.2439	0.00103778	0.0393834
ctg7-963278-963723	BosBovB	+	6	80.3779	75.3361	86.9056	-11.5696	5.74679e-06	0.0139836
ctg7-1173306-1173891	BosL1A3	+	13	78.3813	84.1019	71.2665	12.8354	0.00103778	0.0393834
ctg7-1304368-1305096	BosBovB	+	12	75.9136	87.5206	61.9569	25.5637	0.00015926	0.0223249
ctg7-1948801-1949523	BosL1B	-	3	85.2167	89.7729	79.609	10.1639	0.00158966	0.0475045
ctg7-1956727-1961482	BosL1A2	-	13	80.1778	84.8886	74.3845	10.5041	0.000858483	0.0368467
ctg7-3079945-3080537	BosBovB	+	5	64.2714	59.035	70.7162	-11.6812	0.000707298	0.0344551
ctg7-3147497-3147878	BosL1A5	+	4	83.9836	88.6922	78.1885	10.5037	0.000148393	0.0223249
ctg7-3229708-3230625	BosL1B	-	3	48.8451	59.5064	37.1929	22.3135	0.00117074	0.0422702
ctg7-4273427-4273494	BosBovB	+	3	14.5362	4.38958	27.0244	-22.6348	0.000615373	0.034079
ctg7-4906595-4906681	BosBovB	-	4	82.9286	94.8258	67.0656	27.7602	0.000899488	0.0385891
ctg7-5792737-5793884	BosBovB	+	17	79.9227	86.049	72.4163	13.6327	0.00103778	0.0393834
ctg7-5820356-5820394	BosBovB	-	3	54.4902	64.2115	42.5256	21.6858	2.67594e-05	0.0161846
ctg7-6824458-6824601	BosL1A6	+	3	88.1049	95.8229	76.8788	18.9441	0.000761671	0.0368467
ctg7-7210608-7210777	BosBovB	+	5	73.6907	78.6737	67.7077	10.966	0.00178879	0.0484939
ctg7-7237973-7238718	BosL1B	-	3	57.0821	62.5827	50.1899	12.3928	0.000707298	0.0344551
ctg7-7276606-7278136	BosBovB	+	5	68.184	76.2956	58.8172	17.4784	2.00696e-05	0.0154155
ctg7-7601307-7601583	BosL1B	+	4	68.3125	73.3555	62.1058	11.2497	0.000707298	0.0344551
ctg7-8082641-8082776	BosBovB	+	7	83.7831	88.5839	77.8559	10.7279	0.00015926	0.0223249
ctg7-8390175-8390916	BosL1B	+	4	69.8228	76.3846	62.0587	14.3259	7.73607e-05	0.0192534
ctg7-8487109-8489085	BosL1A6	-	6	66.4437	73.6686	57.6819	15.9867	0.000311152	0.0262875
ctg7-8516569-8518127	BosL1A3	+	4	69.8066	76.5606	61.1007	15.4599	0.00103778	0.0393834
ctg7-8537614-8543775	BosL1A2	-	19	72.8533	78.1913	66.4051	11.7862	0.00038477	0.028234
ctg7-8618281-8619635	BosBovB	+	6	64.3164	70.6336	56.5936	14.04	0.000858483	0.0368467
ctg7-8730867-8731116	BosL1A5	-	3	72.9098	79.6937	64.5603	15.1335	0.00171346	0.0484939
ctg7-8732679-8732816	BosL1A3	+	3	75.8287	82.8937	67.1333	15.7604	0.00038477	0.028234
ctg7-8737976-8740489	BosL1A4	-	12	75.6046	80.5886	69.4185	11.1701	9.90217e-05	0.0201357
ctg7-8771287-8771649	BosL1A3	-	7	70.4444	77.3133	62.7744	14.5389	0.00015926	0.0223249
ctg7-8785697-8785904	BosBovB	+	3	77.2177	84.1291	69.0782	15.0509	0.000580014	0.032187
ctg7-8861850-8864515	BosBovB	-	13	74.4648	80.753	66.8961	13.8569	0.00124915	0.0422702
ctg7-8887091-8887468	BosL1B	+	4	80.0332	86.8367	71.6596	15.1771	0.000200254	0.0236464
ctg7-8899595-8903246	BosBovB	+	37	78.8605	83.7111	72.8005	10.9106	0.000473624	0.0303043
ctg7-8936790-8937181	BosL1A2	+	3	72.9074	79.7535	63.7068	16.0468	0.00149782	0.0450387
ctg7-9011083-9011662	BosL1A3	+	3	81.1148	85.8647	75.6027	10.262	0.00103778	0.0393834
ctg7-9046803-9047206	BosBovB	+	3	77.4558	84.4367	69.0303	15.4063	0.000707298	0.0344551
ctg7-9049752-9049910	BosL1A3	-	3	72.635	81.516	61.8679	19.648	0.0013664	0.0450387
ctg7-9051404-9054388	BosBovB	+	25	70.6981	76.6833	63.3943	13.289	7.73607e-05	0.0192534
ctg7-9054388-9055561	BosL1A6	+	5	72.0991	77.6744	65.1004	12.5739	5.9973e-05	0.0184022
ctg7-9056356-9057167	BosL1A6	+	3	63.1154	68.6269	56.441	12.1859	0.000858483	0.0368467
ctg7-9058081-9062915	BosL1A2	-	13	74.4178	79.8545	67.6377	12.2168	0.000250236	0.0249233
ctg7-9062916-9063066	BosL1A8	-	3	66.6527	72.6365	58.9352	13.7013	0.00124915	0.0422702
ctg7-9062846-9063055	BosL1A3	-	4	62.7495	70.5422	52.8937	17.6485	0.000414629	0.0301142
ctg7-9082726-9083090	BosL1A8	-	4	79.8133	85.1189	73.9731	11.1459	0.000250236	0.0249233
ctg7-9090501-9092078	BosBovB	-	10	74.3743	79.3429	68.3992	10.9437	0.00015926	0.0223249
ctg7-9093911-9099390	BosL1A8	+	25	76.1499	82.2521	68.4843	13.7678	0.000126017	0.0210476
ctg7-9101889-9103059	BosBovB	+	13	81.7328	86.435	76.0737	10.3612	0.000707298	0.0344551
ctg7-9131549-9132458	BosL1A8	-	7	80.7187	87.2753	72.9016	14.3737	1.17883e-07	0.0111046
ctg7-9146670-9147900	BosBovB	+	7	74.3348	79.1719	68.375	10.7968	0.00124915	0.0422702
ctg7-9155140-9157954	BosL1B	-	11	65.2324	72.5597	56.39	16.1697	3.52765e-05	0.0168683
ctg7-9158649-9159197	BosBovB	+	5	71.9315	77.4532	65.0954	12.3578	0.00124915	0.0422702
ctg7-9159197-9161177	BosL1A6	+	7	51.5022	58.7047	42.6627	16.042	9.90217e-05	0.0201357
ctg7-9164858-9165240	BosBovB	+	10	75.3591	80.7598	68.9932	11.7666	0.000707298	0.0344551
ctg7-9187409-9191898	BosL1A3	-	21	63.7553	68.9557	57.4597	11.496	0.000580014	0.032187
ctg7-9198684-9202115	BosBovB	+	31	76.203	81.1886	70.0463	11.1423	0.00149782	0.0450387
ctg7-9204358-9204752	BosL1A6	+	3	59.7146	68.8958	48.3639	20.532	0.00015926	0.0223249
ctg7-9230656-9231175	BosBovB	+	10	71.9127	77.8998	64.785	13.1147	4.62101e-05	0.017501
ctg7-9272226-9273989	BosL1A6	+	3	67.2463	75.6615	56.5644	19.097	0.000580014	0.032187
ctg7-9288599-9289209	BosL1A3	+	8	77.6636	82.9046	71.5196	11.385	0.000250236	0.0249233
ctg7-9295675-9297686	BosL1A6	+	5	75.3986	80.4095	69.3931	11.0165	0.00178879	0.0484939
ctg7-9347652-9347919	BosBovB	-	9	74.4956	79.6467	67.9243	11.7224	0.000858483	0.0368467
ctg7-9350380-9350787	BosL1B	-	3	73.1921	78.8594	66.2564	12.603	0.000707298	0.0344551
ctg7-9356505-9356713	BosL1A2	+	3	63.2981	72.1601	51.6652	20.495	0.000575562	0.032187
ctg7-9380957-9381399	BosL1A3	+	5	66.1598	76.1566	53.9391	22.2175	0.00171346	0.0484939
ctg7-9385467-9390451	BosL1A6	+	27	75.9229	81.7823	68.7766	13.0057	0.000473624	0.0303043
ctg7-9394416-9395496	BosBovB	-	8	65.5299	72.2984	57.5986	14.6998	0.000858483	0.0368467
ctg7-9431434-9433000	BosBovB	-	11	74.4757	79.8555	67.7147	12.1407	0.00124915	0.0422702
ctg7-9671588-9672933	BosBovB	-	7	68.329	73.7442	62.0545	11.6897	0.00100411	0.0393834
ctg7-9749493-9750090	BosL1A6	+	3	52.8812	59.3387	45.0427	14.296	0.00103778	0.0393834
ctg7-9793882-9795071	BosBovB	-	6	69.5018	75.615	61.8399	13.7751	0.00149782	0.0450387
ctg7-9840830-9843115	BosL1B	-	13	72.4205	77.9432	65.6486	12.2946	0.00149782	0.0450387
ctg7-9846257-9849915	BosL1A3	+	16	68.8956	73.553	63.2612	10.2917	0.00124915	0.0422702
ctg7-9884636-9885278	BosL1B	+	3	75.4575	81.2185	68.2571	12.9613	0.000707298	0.0344551
ctg7-10287391-10288070	BosL1A2	+	5	71.7898	76.613	66.0153	10.5978	0.00149782	0.0450387
ctg7-10357152-10357245	BosBovB	-	3	76.8636	83.4169	69.0154	14.4015	0.000707298	0.0344551
ctg7-10367325-10368034	BosL1A3	-	10	82.9289	90.1076	74.0655	16.0422	5.9973e-05	0.0184022
ctg7-10487236-10488806	BosBovB	+	11	68.5528	74.6457	61.4254	13.2203	0.000473624	0.0303043
ctg7-10504749-10506102	BosL1A3	+	24	79.4468	83.9057	73.8516	10.0541	0.00038477	0.028234
ctg7-10507602-10508553	BosL1A3	+	5	62.0668	68.9708	53.6498	15.321	0.00178879	0.0484939
ctg7-10511947-10517334	BosL1A3	+	30	76.2267	82.0784	69.1807	12.8977	9.90217e-05	0.0201357
ctg7-10522895-10524317	BosBovB	+	6	77.4037	83.8928	70.5098	13.383	0.000858483	0.0368467
ctg7-10528390-10530186	BosBovB	-	16	79.0771	85.1341	72.2214	12.9127	0.000250236	0.0249233
ctg7-10532327-10535226	BosL1A6	-	11	78.4692	85.1588	70.9283	14.2306	0.00103778	0.0393834
ctg7-10539285-10539727	BosL1A3	-	3	65.2403	77.4019	49.548	27.8539	0.000250236	0.0249233
ctg7-10555716-10563313	BosL1A3	+	36	77.5833	83.3431	70.83	12.5132	0.000473624	0.0303043
ctg7-10631500-10632105	BosL1A6	-	4	76.5605	81.9468	70.1191	11.8277	0.00149782	0.0450387
ctg7-10641825-10642302	BosL1A3	+	7	80.7842	85.8969	74.4743	11.4226	0.00103778	0.0393834
ctg7-10675079-10677858	BosBovB	-	19	74.4157	80.5887	67.0711	13.5175	0.00103778	0.0393834
ctg7-10732962-10734787	BosBovB	-	10	74.9358	79.5084	69.1412	10.3673	7.73607e-05	0.0192534
ctg7-10739679-10740573	BosBovB	+	4	83.3205	90.57	75.2396	15.3304	0.000350963	0.028234
ctg7-10785444-10785994	BosBovB	+	7	89.4387	94.4583	84.2286	10.2297	0.00124915	0.0422702
ctg7-10834121-10834671	BosBovB	-	8	85.0263	89.9791	79.2662	10.7129	9.90217e-05	0.0201357
ctg7-10864831-10867471	BosL1A6	+	10	83.436	88.9463	76.5251	12.4212	0.00103778	0.0393834
ctg7-10886096-10894434	BosL1A2	-	22	80.0036	84.8249	73.9814	10.8435	0.000858483	0.0368467
ctg7-10900900-10901387	BosL1A3	+	6	83.1801	92.45	73.3042	19.1457	0.00092863	0.0393834
ctg7-10921493-10922371	BosBovB	-	3	86.1746	91.6992	79.261	12.4382	0.000250236	0.0249233
ctg7-10924398-10925602	BosL1B	-	5	78.9258	84.0772	72.5662	11.5111	0.00124915	0.0422702
ctg7-10942415-10942900	BosBovB	-	4	83.7901	90.1638	75.7592	14.4046	0.000580014	0.032187
ctg7-11091503-11091845	BosL1B	+	3	26.8266	9.6663	47.2856	-37.6193	0.000187642	0.0236464
ctg7-11144301-11144525	BosL1B	-	5	85.3448	92.7007	76.0905	16.6102	0.00126597	0.0424657
ctg7-11201101-11201526	BosL1B	-	4	82.3806	87.6937	75.8413	11.8524	0.00149782	0.0450387
ctg7-11282558-11282813	BosL1B	+	3	85.7308	96.0196	74.7791	21.2406	0.000425261	0.0303043
ctg7-11283479-11283998	BosBovB	-	8	86.6226	95.2205	76.4428	18.7777	8.84122e-07	0.0126103
ctg7-12260970-12261059	BosL1B	+	3	64.4709	77.5436	50.6197	26.9239	0.000245131	0.0249233
ctg7-12648408-12649232	BosBovB	+	10	87.0764	95.8193	76.8196	18.9996	0.000200254	0.0236464
ctg7-13735100-13736927	BosBovB	+	11	75.6418	80.627	69.9913	10.6357	4.62101e-05	0.017501
ctg7-13785956-13787065	BosBovB	-	8	70.5054	75.2801	64.4331	10.847	0.000707298	0.0344551
ctg7-13820871-13821637	BosBovB	-	4	63.2193	70.2842	54.5045	15.7797	0.000473624	0.0303043
ctg7-13863507-13864314	BosBovB	-	4	56.3954	63.0948	48.4307	14.6641	0.000707298	0.0344551
ctg7-13868775-13872409	BosL1B	+	10	47.5386	52.9466	40.6541	12.2925	0.00015926	0.0223249
ctg7-14099903-14100270	BosBovB	+	4	46.2905	52.4139	39.3441	13.0698	0.00124915	0.0422702
ctg7-14155121-14156566	BosBovB	-	10	64.9789	70.3536	58.4762	11.8774	0.00124915	0.0422702
ctg7-14393141-14394373	BosBovB	-	8	85.8668	91.7161	78.683	13.0331	5.9973e-05	0.0184022
ctg7-14806724-14807170	BosBovB	+	5	56.8627	50.8089	64.2685	-13.4596	0.00124915	0.0422702
ctg7-15135028-15135303	BosBovB	-	11	25.8351	31.5071	19.0019	12.5051	0.00103778	0.0393834
ctg7-15357807-15358028	BosBovB	+	7	90.4399	95.3304	84.1218	11.2086	0.000580014	0.032187
ctg7-15367548-15367611	BosBovB	+	3	74.1753	81.025	65.7449	15.2801	0.000311152	0.0262875
ctg7-15371592-15371823	BosBovB	+	6	91.0583	95.5657	85.4814	10.0843	0.000250236	0.0249233
ctg7-15925059-15925496	BosBovB	-	6	56.0479	61.3255	49.5159	11.8096	0.00103778	0.0393834
ctg7-16112999-16113188	BosL1B	+	5	25.5979	13.8187	40.3888	-26.57	0.000580014	0.032187
ctg7-16253071-16254711	BosBovB	+	7	72.0192	78.8897	64.1638	14.7259	0.00149782	0.0450387
ctg7-16389560-16390047	BosBovB	+	9	86.4272	92.1539	79.6884	12.4655	0.000200254	0.0236464
ctg7-16742692-16743820	BosL1B	-	4	88.4658	94.5325	81.225	13.3075	0.00117239	0.0422702
ctg7-17552176-17552715	BosL1B	+	7	91.2838	96.3802	85.0117	11.3685	0.000575562	0.032187
ctg7-17714648-17715102	BosBovB	-	4	63.7223	55.4732	73.901	-18.4278	8.84122e-07	0.0126103
ctg7-17848540-17849053	BosL1B	+	3	89.6764	94.4562	83.7936	10.6627	8.66152e-05	0.0201357
ctg7-17894919-17896204	BosL1A6	-	5	84.0839	91.5949	74.6335	16.9614	0.00108524	0.0407167
ctg7-17896631-17896876	BosL1B	+	4	83.6287	89.8802	76.7325	13.1477	0.000200254	0.0236464
ctg7-18363839-18364292	BosL1B	-	7	65.8826	57.28	76.4695	-19.1895	0.00124915	0.0422702
ctg7-18889245-18890008	BosBovB	+	7	77.1097	81.9757	71.4033	10.5724	0.000473624	0.0303043
ctg7-19544761-19545598	BosBovB	+	6	87.2748	92.6536	80.5474	12.1062	0.00103778	0.0393834
ctg7-19814216-19814344	BosL1A3	-	3	90.2328	95.9844	83.1538	12.8305	0.000210536	0.0245301
ctg7-19899103-19899197	BosL1B	+	3	65.2332	57.1155	75.3383	-18.2229	0.00149782	0.0450387
ctg7-20242654-20243466	BosBovB	-	6	68.6417	76.8807	58.5013	18.3794	0.000707298	0.0344551
ctg7-20249500-20250036	BosBovB	+	4	66.5276	71.9728	59.9519	12.0208	0.00178879	0.0484939
ctg7-21024258-21025078	BosBovB	-	11	89.2538	94.627	82.6406	11.9864	0.000311152	0.0262875
ctg7-21336668-21337581	BosBovB	-	8	82.8407	90.1211	73.8749	16.2462	0.00103778	0.0393834
ctg7-21504300-21504903	BosBovB	-	3	39.3071	27.3337	53.7295	-26.3957	0.00178879	0.0484939
ctg7-21538005-21538267	BosL1B	-	8	73.3665	80.848	64.7014	16.1466	5.9973e-05	0.0184022
ctg7-21654188-21655136	BosL1B	+	21	78.7708	73.9753	84.7311	-10.7558	0.000858483	0.0368467
ctg7-21842095-21843202	BosL1B	+	6	59.0131	65.2812	51.0826	14.1986	0.000250236	0.0249233
ctg7-22175396-22175505	BosBovB	-	7	81.0935	88.8869	70.6863	18.2006	0.00103778	0.0393834
ctg7-22423241-22423605	BosL1A8	+	4	87.4807	93.3491	80.8312	12.5179	2.00696e-05	0.0154155
ctg7-22652610-22653493	BosL1A3	-	22	82.001	91.1004	71.2938	19.8066	0.000200254	0.0236464
ctg7-23459220-23459304	BosBovB	-	3	59.4567	67.238	51.4972	15.7408	0.000201014	0.0237288
ctg7-26206838-26206949	BosBovB	-	5	81.6193	90.0175	71.2831	18.7344	0.000311152	0.0262875
ctg7-26464763-26465871	BosBovB	+	5	90.6407	95.1435	84.7378	10.4057	0.000210536	0.0245301
ctg7-26816553-26816868	BosL1B	+	3	17.3822	2.32683	35.2814	-32.9546	0.00104094	0.0394952
ctg7-26816588-26816903	BosL1A8	+	3	17.3822	2.32683	35.2814	-32.9546	0.00104094	0.0394952
ctg7-27480365-27480793	BosL1A5	-	4	79.903	88.7445	68.7206	20.0239	0.000793191	0.0368467
ctg7-31240593-31241661	BosL1B	+	7	59.4576	64.4439	53.6109	10.833	0.00124915	0.0422702
ctg7-32083065-32083154	BosBovB	-	3	61.6958	69.3422	52.7201	16.6221	0.000178462	0.0236464
ctg7-32171603-32171765	BosL1A3	+	3	63.8317	68.8316	58.041	10.7906	0.000580014	0.032187
ctg7-32283963-32285083	BosBovB	+	5	70.6203	75.6713	64.2395	11.4318	0.00149782	0.0450387
ctg7-32625952-32626429	BosL1A6	+	3	82.4989	87.7146	76.0795	11.6351	0.00038477	0.028234
ctg7-32891235-32892239	BosL1B	+	3	74.3462	79.5399	67.7667	11.7732	0.00015926	0.0223249
ctg7-33437893-33439953	BosBovB	-	4	76.22	80.7541	70.509	10.2451	0.000473624	0.0303043
ctg7-33934483-33934756	BosL1A3	-	3	76.4121	85.8719	64.7692	21.1026	0.000580014	0.032187
ctg7-34630666-34631030	BosL1A3	+	5	80.71	91.4994	67.1897	24.3096	2.00696e-05	0.0154155
ctg7-34766837-34767026	BosBovB	-	4	76.8784	81.8971	70.7588	11.1383	0.00178879	0.0484939
ctg7-35502134-35502339	BosBovB	-	7	86.1782	92.4115	78.5661	13.8454	5.74679e-06	0.0139836
ctg7-37909395-37910069	BosBovB	+	3	85.2684	90.1063	79.7218	10.3845	0.00149782	0.0450387
ctg7-38181975-38183088	BosBovB	+	6	88.1271	92.8459	82.1486	10.6973	0.000858483	0.0368467
ctg7-38566287-38566481	BosBovB	-	5	80.5821	89.6281	69.4485	20.1797	0.000250236	0.0249233
ctg7-39100736-39101678	BosBovB	+	7	74.7551	81.109	67.2291	13.8799	2.67594e-05	0.0161846
ctg7-39914799-39915108	BosL1B	-	3	75.6523	80.801	69.3154	11.4857	0.000580014	0.032187
ctg7-40346117-40346161	BosBovB	-	3	83.8625	88.7222	78.2551	10.4671	0.00151984	0.0456061
ctg7-40540509-40541345	BosL1B	+	3	85.1029	89.7042	79.4397	10.2644	0.000311152	0.0262875
ctg7-40722525-40723054	BosBovB	-	5	84.7764	89.3763	79.0873	10.2891	0.000858483	0.0368467
ctg7-40735173-40735671	BosBovB	+	7	85.6983	90.8834	79.3682	11.5152	0.000580014	0.032187
ctg7-40746168-40746677	BosBovB	+	3	83.8167	92.1366	73.5268	18.6098	0.000580014	0.032187
ctg7-40891136-40892065	BosBovB	+	5	85.0488	91.7305	76.8235	14.9069	0.00149782	0.0450387
ctg7-40892063-40895727	BosL1A3	-	24	76.9189	82.3175	70.7285	11.589	0.00038477	0.028234
ctg7-40978294-40979051	BosBovB	-	6	78.8076	84.3793	71.8465	12.5328	0.000250236	0.0249233
ctg7-40984905-40985400	BosBovB	-	3	75.2794	83.9344	65.0835	18.8508	0.00103778	0.0393834
ctg7-40988855-40990830	BosBovB	-	9	77.233	82.9767	70.0373	12.9394	0.000126017	0.0210476
ctg7-41141797-41142682	BosL1A3	-	4	79.5901	86.3812	72.1418	14.2394	0.00124915	0.0422702
ctg7-41283063-41285511	BosBovB	+	14	67.6161	74.612	58.889	15.723	0.000580014	0.032187
ctg7-41306263-41307913	BosBovB	+	5	75.2231	81.2319	67.6828	13.5491	9.90217e-05	0.0201357
ctg7-41309382-41310052	BosL1A6	-	3	64.1587	73.7517	52.9268	20.8249	9.90217e-05	0.0201357
ctg7-41459106-41459541	BosBovB	-	3	70.0138	76.7763	61.8107	14.9656	0.000473624	0.0303043
ctg7-41462335-41463181	BosBovB	-	3	73.4152	79.3917	65.9972	13.3945	0.00149782	0.0450387
ctg7-41816734-41817640	BosBovB	+	4	76.1279	81.5768	69.2968	12.2801	0.000311152	0.0262875
ctg7-42032014-42032873	BosL1B	+	3	70.927	84.8033	53.8613	30.942	7.73607e-05	0.0192534
ctg7-42058397-42060387	BosBovB	-	5	71.3619	76.3038	65.3522	10.9516	0.00103778	0.0393834
ctg7-42068323-42071480	BosBovB	-	5	66.0017	73.6418	56.9028	16.739	0.00038477	0.028234
ctg7-42182189-42183577	BosBovB	+	6	65.9704	73.355	56.8096	16.5454	0.000473624	0.0303043
ctg7-42501066-42503036	BosL1B	-	7	75.8702	81.1756	69.4082	11.7674	0.000707298	0.0344551
ctg7-43400681-43401420	BosL1B	+	4	54.8164	43.8844	68.2712	-24.3868	0.000296533	0.0262875
ctg7-43437143-43437909	BosBovB	-	11	72.4545	81.6102	61.186	20.4242	7.73607e-05	0.0192534
ctg7-43784623-43784714	BosBovB	+	6	85.5261	95.3917	73.384	22.0077	0.000200254	0.0236464
ctg7-44361808-44362790	BosL1B	+	14	23.2218	17.0615	30.7472	-13.6857	5.9973e-05	0.0184022
ctg7-45814861-45815051	BosBovB	-	6	89.5256	95.6427	81.9968	13.6459	0.000296533	0.0262875
ctg7-46576472-46576581	BosL1A6	-	3	6.82011	0.308333	14.8346	-14.5263	4.39091e-05	0.017501
ctg7-46833798-46835974	BosL1B	+	13	73.6314	68.7109	79.7139	-11.0029	1.09926e-05	0.0145334
ctg7-47369672-47370447	BosBovB	-	6	63.0784	68.7737	55.9847	12.789	0.000473624	0.0303043
ctg7-50109071-50109144	BosBovB	+	3	81.9714	94.9375	65.6381	29.2994	0.00017594	0.0236464
ctg7-50722085-50722177	BosBovB	-	4	29.0637	7.92416	53.383	-45.4589	0.000676282	0.0344551
ctg7-51625256-51625578	BosL1B	-	3	63.2678	54.9083	73.5564	-18.6481	0.000707298	0.0344551
ctg7-51721274-51721456	BosBovB	+	3	89.6224	97.2135	80.2795	16.9341	0.000250236	0.0249233
ctg7-51730355-51730475	BosBovB	-	9	32.092	39.95	22.4205	17.5295	2.67594e-05	0.0161846
ctg7-51757620-51757867	BosL1B	+	4	15.9966	5.58437	28.8115	-23.2272	0.000707298	0.0344551
ctg7-51997614-51999444	BosBovB	+	4	57.6047	64.127	49.7512	14.3758	9.90217e-05	0.0201357
ctg7-52197954-52198958	BosL1B	+	3	43.1681	47.6197	37.5672	10.0525	0.00178879	0.0484939
ctg7-53919207-53919344	BosBovB	+	3	90.4638	96.799	82.6667	14.1323	0.000790823	0.0368467
ctg7-54335202-54335998	BosL1B	-	3	81.0615	86.2823	74.5324	11.7499	0.00103778	0.0393834
ctg7-54427047-54427856	BosL1B	+	4	90.1715	95.0796	84.1471	10.9325	0.0013664	0.0450387
ctg7-55171827-55172432	BosBovB	+	5	76.0357	71.3713	82.0481	-10.6769	0.000580014	0.032187
ctg7-57063513-57063903	BosL1B	-	3	75.2637	70.0094	81.7647	-11.7554	0.000148393	0.0223249
ctg7-57810801-57811099	BosL1A6	-	3	57.9478	65.1147	49.1254	15.9892	0.000250089	0.0249233
ctg7-58387011-58387459	BosBovB	+	3	58.8671	66.2269	50.06	16.1669	4.62101e-05	0.017501
ctg7-59695208-59696370	BosBovB	-	5	75.3296	82.1836	66.904	15.2796	0.000126017	0.0210476
ctg7-60273241-60274973	BosBovB	+	13	90.0969	95.2712	83.811	11.4603	0.00124915	0.0422702
ctg7-61831291-61831420	BosBovB	+	7	76.0955	91.1357	57.0663	34.0694	1.09926e-05	0.0145334
ctg7-61908552-61909013	BosL1A3	+	4	78.4491	89.1195	65.3163	23.8032	0.000707298	0.0344551
ctg7-62171006-62171598	BosL1B	+	5	52.216	43.9409	62.2145	-18.2735	0.000473624	0.0303043
ctg7-62514208-62514787	BosBovB	-	10	74.422	68.2028	82.0861	-13.8833	9.90217e-05	0.0201357
ctg7-63078565-63079179	BosBovB	-	4	73.7155	78.2305	68.1587	10.0718	1.49417e-05	0.014777
ctg7-63985105-63985547	BosBovB	+	3	79.2114	87.2779	69.5212	17.7567	0.00130352	0.04371
ctg7-64044412-64045367	BosBovB	-	5	78.5117	84.1323	72.3046	11.8277	0.00015926	0.0223249
ctg7-65445620-65445844	BosL1B	-	5	91.8524	96.7387	86.2169	10.5217	0.0009165	0.0392742
ctg7-66247650-66249797	BosL1B	-	5	63.2397	70.1275	54.7148	15.4127	7.73607e-05	0.0192534
ctg7-66330513-66331168	BosBovB	-	3	69.5136	74.7581	63.0306	11.7275	0.00183285	0.049578
ctg7-67265739-67266840	BosBovB	+	7	71.5085	76.488	65.5716	10.9164	0.000311152	0.0262875
ctg7-67276517-67279311	BosBovB	-	13	68.5004	73.1608	62.5837	10.5772	0.00015926	0.0223249
ctg7-67304257-67305349	BosBovB	-	3	72.3055	77.7391	65.9821	11.757	0.00038477	0.028234
ctg7-67404958-67405794	BosL1A3	-	10	58.7957	63.4693	53.0979	10.3714	2.00696e-05	0.0154155
ctg7-67727471-67728324	BosBovB	+	3	75.742	82.0833	67.9372	14.1462	0.000473624	0.0303043
ctg7-68768544-68769224	BosL1B	-	3	77.03	83.3184	69.5314	13.7871	0.00149782	0.0450387
ctg7-69414238-69414888	BosBovB	-	8	90.4055	95.1136	84.7337	10.3799	0.000126017	0.0210476
ctg7-69567527-69568140	BosBovB	-	7	68.1011	61.5125	76.2193	-14.7068	0.00124915	0.0422702
ctg7-71049399-71050373	BosBovB	+	3	84.9578	90.0217	78.822	11.1997	0.000707298	0.0344551
ctg7-71155836-71157217	BosL1A3	-	24	75.4705	82.4815	67.0102	15.4712	0.000707298	0.0344551
ctg7-71297719-71300532	BosL1B	-	4	80.9918	86.7656	73.9736	12.7921	0.000707298	0.0344551
ctg7-72780346-72780661	BosL1A8	+	4	53.1926	60.1823	44.6055	15.5767	0.00015926	0.0223249
ctg7-73359184-73359581	BosBovB	-	6	80.9791	88.6492	71.5408	17.1084	0.000858483	0.0368467
ctg7-73371630-73372287	BosL1B	+	3	78.8109	86.2476	69.7859	16.4617	0.00103778	0.0393834
ctg7-73441932-73442384	BosL1A8	-	4	77.2036	82.4937	70.7482	11.7455	0.000580014	0.032187
ctg7-74453805-74455724	BosL1B	+	3	60.8456	66.3812	54.35	12.0312	0.000858483	0.0368467
ctg7-74570119-74570796	BosBovB	-	6	79.8357	85.187	72.5858	12.6012	0.00147414	0.0450387
ctg7-74726612-74726684	BosBovB	-	4	78.7159	88.9456	66.4269	22.5187	4.62101e-05	0.017501
ctg7-74743333-74744397	BosBovB	+	7	71.1643	75.9272	65.2354	10.6917	0.000473624	0.0303043
ctg7-78173211-78173751	BosBovB	+	3	78.2852	73.4364	83.947	-10.5105	0.000707298	0.0344551
ctg7-78782082-78782753	BosL1B	+	3	73.7788	80.0812	66.2534	13.8278	0.000580014	0.032187
ctg7-79227368-79227869	BosBovB	+	8	75.9034	82.6976	67.5928	15.1048	2.00696e-05	0.0154155
ctg7-80421008-80421284	BosL1B	+	6	83.0612	90.1203	74.3731	15.7472	0.00178879	0.0484939
ctg7-81057105-81057347	BosBovB	+	8	79.5327	86.6273	70.4599	16.1674	0.000126017	0.0210476
ctg7-81293573-81294457	BosBovB	+	7	91.0222	95.4935	85.3101	10.1834	0.000350963	0.028234
ctg7-81669482-81670056	BosBovB	+	6	83.4948	89.2342	76.4498	12.7844	7.73607e-05	0.0192534
ctg7-81725960-81726137	BosL1B	+	3	20.1962	4.86354	38.7051	-33.8416	0.000291964	0.0262875
ctg7-82900609-82901863	BosL1B	-	6	76.9815	82.1859	70.2382	11.9478	0.00103778	0.0393834
ctg7-82931794-82932190	BosL1B	+	3	86.5885	93.57	77.5652	16.0048	1.90124e-05	0.0154155
ctg7-82941915-82942666	BosL1B	+	5	92.818	98.5321	85.8585	12.6736	4.62141e-05	0.017501
ctg7-85011018-85011738	BosL1B	+	3	61.9052	69.1434	52.6199	16.5235	0.000311152	0.0262875
ctg7-86689616-86690516	BosBovB	-	3	74.5664	68.7518	81.7293	-12.9775	0.00124915	0.0422702
ctg7-86940274-86940801	BosBovB	-	7	76.2241	70.0439	83.5864	-13.5425	0.000473624	0.0303043
ctg7-86943599-86944404	BosL1B	-	4	66.7681	58.6605	76.8056	-18.1451	0.00038477	0.028234
ctg7-87457034-87457649	BosBovB	-	5	70.338	75.37	64.3323	11.0377	0.000126017	0.0210476
ctg7-88837238-88839443	BosBovB	+	5	89.0093	94.3004	82.7277	11.5727	0.000350963	0.028234
ctg7-88856749-88857345	BosL1B	-	3	89.1563	93.8948	83.3244	10.5704	0.00158966	0.0475045
ctg7-93286809-93286958	BosBovB	-	9	47.7396	35.6734	63.2934	-27.6201	2.00696e-05	0.0154155
ctg7-94462120-94462859	BosL1A6	-	5	84.8828	90.009	79.4444	10.5646	0.00178879	0.0484939
ctg7-94604040-94604391	BosL1B	-	4	80.621	88.4264	71.4691	16.9572	0.00149782	0.0450387
ctg7-95673966-95674405	BosBovB	+	4	87.2934	95.0294	77.7769	17.2525	0.000447443	0.0303043
ctg7-95806483-95807141	BosBovB	-	3	82.8062	93.2001	70.7062	22.4939	0.000449632	0.0303043
ctg7-97462270-97463417	BosL1A3	-	3	82.658	90.6244	72.9485	17.6759	0.000599879	0.0332454
ctg7-98497670-98498634	BosL1A6	-	8	74.3296	79.4102	67.9065	11.5037	0.000707298	0.0344551
ctg7-98502911-98504131	BosBovB	-	8	85.7943	91.3403	79.5976	11.7427	0.000250236	0.0249233
ctg7-98566970-98573238	BosL1A3	-	21	75.3087	81.7325	67.2641	14.4684	0.000473624	0.0303043
ctg7-98655241-98655513	BosL1A1	-	5	78.1225	83.667	71.0914	12.5755	0.000473624	0.0303043
ctg7-98679541-98682699	BosBovB	+	16	83.9955	88.5139	78.377	10.1369	7.73607e-05	0.0192534
ctg7-98724429-98724892	BosBovB	+	4	76.5831	82.5719	68.7427	13.8291	0.000473624	0.0303043
ctg7-98769676-98770111	BosBovB	+	5	80.6714	88.2624	72.6787	15.5836	0.00103778	0.0393834
ctg7-98855039-98855405	BosL1A2	-	3	83.0804	93.7267	70.2406	23.4861	0.00036041	0.028234
ctg7-98877415-98879439	BosBovB	+	12	83.3131	88.7598	76.746	12.0138	9.90217e-05	0.0201357
ctg7-98926747-98928945	BosL1A6	-	13	86.1253	91.9532	79.0971	12.8561	0.000707298	0.0344551
ctg7-98950397-98950691	BosBovB	+	3	87.7298	96.48	77.6333	18.8467	0.000643643	0.0344551
ctg7-99193755-99195423	BosBovB	+	7	77.7444	84.6538	69.1846	15.4692	0.00038477	0.028234
ctg7-99485622-99486204	BosL1B	-	5	80.4539	85.2155	74.8188	10.3967	0.000311152	0.0262875
ctg7-99501599-99502315	BosBovB	-	4	79.7996	86.9771	72.0606	14.9165	0.00124915	0.0422702
ctg7-99602521-99604494	BosBovB	-	4	79.6655	84.4413	74.0478	10.3935	5.9973e-05	0.0184022
ctg7-99627579-99627765	BosBovB	-	5	71.0194	80.4145	59.2468	21.1677	0.000858483	0.0368467
ctg7-99667711-99669668	BosL1B	-	13	82.4669	87.2871	77.2028	10.0843	0.000200254	0.0236464
ctg7-99766677-99767579	BosBovB	-	3	79.5425	84.4448	73.509	10.9358	0.000414629	0.0301142
ctg7-99950424-99952202	BosL1B	+	3	74.4603	80.8659	66.7948	14.0711	0.000126017	0.0210476
ctg7-100224899-100225554	BosBovB	+	5	83.9528	88.8675	77.8667	11.0008	9.90217e-05	0.0201357
ctg7-100230696-100232100	BosBovB	+	5	76.6556	83.7752	67.7828	15.9924	0.000707298	0.0344551
ctg7-100294296-100295884	BosL1B	+	6	77.5738	84.3951	69.3584	15.0367	3.52765e-05	0.0168683
ctg7-100364772-100365792	BosBovB	+	4	81.1738	86.8531	74.4205	12.4326	0.00178879	0.0484939
ctg7-100371489-100371660	BosBovB	+	4	85.9104	91.3141	79.2317	12.0824	4.62101e-05	0.017501
ctg7-100377756-100379524	BosBovB	-	4	70.8978	81.0154	58.1338	22.8815	3.52765e-05	0.0168683
ctg7-100438367-100439012	BosL1B	-	4	83.9138	90.8498	75.5856	15.2642	9.90217e-05	0.0201357
ctg7-100484680-100485245	BosBovB	-	5	83.6093	88.7856	76.7554	12.0303	0.000250236	0.0249233
ctg7-100526281-100528370	BosL1A3	-	7	72.0003	77.1152	65.9807	11.1345	0.00178879	0.0484939
ctg7-100870737-100872443	BosBovB	-	10	86.1555	91.5006	79.7236	11.777	0.000126017	0.0210476
ctg7-101321538-101323501	BosBovB	+	11	82.6957	91.1201	73.5618	17.5583	9.90217e-05	0.0201357
ctg7-101452034-101454760	BosL1A3	-	10	84.1407	89.3078	77.9148	11.393	0.00103778	0.0393834
ctg7-101513934-101514086	BosBovB	-	4	84.3716	93.8219	72.4484	21.3735	0.00178879	0.0484939
ctg7-103450342-103450550	BosL1A6	+	5	76.0835	82.9784	68.6718	14.3066	0.000580014	0.032187
ctg7-103820214-103820641	BosBovB	-	4	70.5901	75.8855	64.0043	11.8812	0.000311152	0.0262875
ctg7-104416431-104416990	BosBovB	-	3	50.3385	57.2667	42.4413	14.8254	0.00178879	0.0484939
ctg7-105057385-105057960	BosL1A3	+	5	80.9717	86.159	74.9903	11.1687	1.09926e-05	0.0145334
ctg7-106307686-106308128	BosBovB	-	5	75.9971	87.9684	60.7716	27.1968	0.000200254	0.0236464
ctg7-106933669-106933801	BosL1A6	-	3	69.3545	77.3692	59.5862	17.783	2.67594e-05	0.0161846
ctg7-107510311-107510883	BosBovB	-	14	75.1992	80.7525	68.3406	12.4119	0.000200254	0.0236464
ctg7-108507159-108508458	BosL1B	+	6	91.3842	96.913	84.5795	12.3335	0.000126017	0.0210476
ctg7-108683894-108684443	BosL1B	+	20	84.5261	94.7493	73.6839	21.0654	0.000200254	0.0236464
ctg7-109310358-109310439	BosBovB	-	3	79.873	85.926	72.2677	13.6583	0.000580014	0.032187
ctg7-110533838-110534414	BosBovB	+	4	76.7021	82.9656	69.8314	13.1342	0.000580014	0.032187
ctg7-110542978-110543536	BosL1A3	-	13	74.6986	80.7857	67.3527	13.4329	0.000473624	0.0303043
ctg8-456298-457235	BosL1A4	+	3	77.5139	83.5373	70.7278	12.8095	0.00117239	0.0422702
ctg8-497769-498101	BosBovB	+	6	81.1375	88.2005	72.4749	15.7256	0.00124915	0.0422702
ctg8-1297648-1298371	BosBovB	+	10	81.0606	85.7056	75.3339	10.3717	0.00149782	0.0450387
ctg8-1555189-1555800	BosL1B	+	9	88.2281	95.8403	78.3975	17.4428	0.00015926	0.0223249
ctg8-1565673-1565760	BosBovB	+	3	91.8825	97.8323	84.7323	13.1	0.000643498	0.0344551
ctg8-1859878-1861442	BosBovB	+	7	82.0756	87.0771	75.9394	11.1376	0.00124915	0.0422702
ctg8-2355290-2357411	BosBovB	-	6	64.6193	70.1563	57.7032	12.4532	0.00124915	0.0422702
ctg8-3082794-3084174	BosBovB	-	4	53.5611	58.4462	47.4249	11.0213	0.00124915	0.0422702
ctg8-4029191-4030428	BosBovB	+	4	68.388	73.4684	62.9684	10.5	0.00103778	0.0393834
ctg8-4276964-4278147	BosBovB	+	10	67.1266	74.2371	58.3594	15.8778	0.00124915	0.0422702
ctg8-4957990-4959120	BosBovB	+	8	75.5577	83.7706	66.0673	17.7033	0.00149782	0.0450387
ctg8-4966222-4967601	BosBovB	-	6	78.2816	83.2863	72.1937	11.0926	0.000250236	0.0249233
ctg8-4996401-4998115	BosBovB	-	7	68.7132	73.6754	62.6531	11.0222	0.000200254	0.0236464
ctg8-5027248-5029394	BosBovB	-	6	69.1942	74.9333	62.146	12.7872	0.000126017	0.0210476
ctg8-5812977-5813413	BosBovB	-	6	67.2915	59.826	76.4694	-16.6434	0.000250089	0.0249233
ctg8-5976945-5977568	BosBovB	+	5	77.9917	83.3881	71.4235	11.9646	7.73607e-05	0.0192534
ctg8-6100772-6101162	BosL1A3	-	3	66.7967	73.1115	58.8121	14.2994	0.00184607	0.0497498
ctg8-7132075-7134601	BosL1B	+	7	69.0174	74.016	62.8543	11.1617	0.000707298	0.0344551
ctg8-7227719-7229771	BosBovB	-	7	76.2905	80.9534	70.4077	10.5457	7.73607e-05	0.0192534
ctg8-7374087-7375590	BosBovB	+	6	74.54	79.7881	68.0256	11.7624	0.000200254	0.0236464
ctg8-7381546-7381864	BosBovB	+	4	85.3557	92.7817	77.0823	15.6993	0.00147148	0.0450387
ctg8-7400795-7401350	BosBovB	+	4	71.3558	78.954	63.1793	15.7747	0.000580014	0.032187
ctg8-7419798-7420201	BosL1A6	+	6	66.9789	74.4381	58.0679	16.3702	0.00149782	0.0450387
ctg8-8719817-8720093	BosL1B	-	5	24.5834	11.6265	41.1752	-29.5488	0.00103778	0.0393834
ctg8-9004027-9004704	BosBovB	-	10	89.9763	94.7188	84.1683	10.5505	0.000858483	0.0368467
ctg8-9233945-9234571	BosL1B	+	5	80.7307	86.197	74.0269	12.1701	0.000126017	0.0210476
ctg8-9430752-9430835	BosBovB	+	3	83.9178	94.3375	71.0936	23.2439	0.000924575	0.0393834
ctg8-10102349-10103086	BosL1B	+	5	60.4633	69.6366	49.495	20.1416	3.52765e-05	0.0168683
ctg8-10442936-10443397	BosBovB	-	7	77.6793	72.5616	83.978	-11.4164	0.00103778	0.0393834
ctg8-11112063-11113228	BosL1A6	-	5	62.5365	57.9979	68.094	-10.0961	0.000200254	0.0236464
ctg8-11345579-11346308	BosL1B	-	3	77.4643	85.7147	67.5164	18.1983	9.90217e-05	0.0201357
ctg8-11366259-11366937	BosBovB	-	5	84.5486	90.1665	77.9869	12.1795	0.000858483	0.0368467
ctg8-11790553-11791014	BosBovB	-	4	72.3003	78.6126	63.8735	14.739	0.000707298	0.0344551
ctg8-12209437-12210029	BosBovB	-	4	74.0625	78.8321	68.4651	10.367	0.00124915	0.0422702
ctg8-12969467-12970251	BosBovB	-	3	72.8167	77.701	66.8051	10.8959	0.000250236	0.0249233
ctg8-13112843-13112992	BosBovB	+	7	80.5961	88.5516	70.4339	18.1177	4.09643e-06	0.0139836
ctg8-13977676-13977784	BosBovB	-	3	73.6035	80.8088	65.0077	15.8011	9.90217e-05	0.0201357
ctg8-14347436-14349486	BosL1B	+	7	69.9527	74.9324	63.85	11.0824	0.00149782	0.0450387
ctg8-14559064-14559149	BosBovB	+	3	74.9299	82.1583	66.0333	16.125	0.000793191	0.0368467
ctg8-15600740-15601579	BosL1B	-	13	43.4888	38.9339	49.0231	-10.0893	0.000580014	0.032187
ctg8-16167902-16168147	BosBovB	+	6	86.1655	90.7751	80.5814	10.1937	0.000707298	0.0344551
ctg8-17521503-17521689	BosBovB	-	8	77.7362	85.9549	67.9373	18.0176	0.00124915	0.0422702
ctg8-18768981-18769802	BosBovB	+	6	65.1036	70.6028	58.4411	12.1617	5.9973e-05	0.0184022
ctg8-18974979-18976664	BosBovB	-	16	62.4375	68.001	55.4539	12.5471	2.67594e-05	0.0161846
ctg8-19295368-19295897	BosBovB	+	3	59.2517	65.9906	50.9577	15.0329	0.00038477	0.028234
ctg8-19576919-19577281	BosL1B	+	4	77.6914	82.2109	72.1288	10.0821	0.000311152	0.0262875
ctg8-19922159-19923182	BosL1A3	-	5	65.2996	71.0343	58.5819	12.4524	0.00149782	0.0450387
ctg8-20060046-20060338	BosBovB	+	7	72.8879	82.0855	61.6455	20.44	1.97454e-06	0.0126103
ctg8-20640394-20641518	BosBovB	+	7	67.9686	73.4252	61.122	12.3032	0.000473624	0.0303043
ctg8-20826322-20829241	BosBovB	-	15	67.0888	71.6758	61.6176	10.0582	0.000580014	0.032187
ctg8-22427064-22428165	BosBovB	-	6	75.6034	81.7979	68.1808	13.6171	0.000200254	0.0236464
ctg8-22702469-22703641	BosBovB	+	10	83.7541	88.5075	78.0502	10.4572	0.000200254	0.0236464
ctg8-22741536-22742507	BosBovB	-	7	85.7495	90.3815	80.1743	10.2072	0.000473624	0.0303043
ctg8-22760721-22762023	BosBovB	+	8	70.7215	77.704	62.0377	15.6663	4.09643e-06	0.0139836
ctg8-22794293-22795406	BosBovB	+	5	79.9262	84.9902	73.7351	11.255	0.000250089	0.0249233
ctg8-22833675-22834774	BosBovB	+	4	79.1254	86.7484	69.7433	17.0052	0.000311152	0.0262875
ctg8-24372802-24374633	BosL1A3	+	3	85.9472	80.8894	92.2629	-11.3735	0.0010314	0.0393834
ctg8-24598444-24598513	BosBovB	-	3	43.6126	48.5807	36.6462	11.9345	0.00181226	0.0490913
ctg8-24656125-24656318	BosBovB	-	3	78.7856	88.7993	67.7174	21.0819	0.00181967	0.0492778
ctg8-24988358-24988948	BosL1B	+	3	54.7592	48.4188	62.3756	-13.9569	0.00126597	0.0424657
ctg8-25473966-25474645	BosBovB	+	4	75.4076	79.9703	69.5942	10.3762	0.000473624	0.0303043
ctg8-27486763-27487928	BosBovB	+	9	81.7205	87.924	74.7293	13.1947	0.00038477	0.028234
ctg8-28399643-28400968	BosL1A6	-	4	78.3471	83.8102	71.5396	12.2706	0.000250236	0.0249233
ctg8-28619071-28619256	BosL1A3	+	4	82.1172	91.5554	71.0631	20.4923	2.00876e-05	0.0154155
ctg8-28927659-28927915	BosL1A3	-	5	88.0258	94.2896	81.1578	13.1319	0.000676282	0.0344551
ctg8-29006348-29007107	BosBovB	-	4	80.5699	75.7154	87.0175	-11.3021	0.000858483	0.0368467
ctg8-29310296-29310406	BosBovB	-	4	28.0237	11.1984	48.7317	-37.5333	0.00015926	0.0223249
ctg8-29384464-29385017	BosBovB	-	8	64.7141	57.0236	74.1297	-17.1061	2.67594e-05	0.0161846
ctg8-29726962-29727154	BosBovB	-	3	86.8495	81.4256	93.5474	-12.1219	0.0017067	0.0484939
ctg8-29999554-30000208	BosBovB	-	4	85.8273	91.2555	79.2261	12.0294	0.00038477	0.028234
ctg8-30017897-30019259	BosBovB	-	10	80.8953	87.7258	72.3788	15.347	0.000200254	0.0236464
ctg8-31498629-31502141	BosL1A2	+	10	88.1308	92.9906	82.603	10.3877	0.000858483	0.0368467
ctg8-31554575-31555135	BosBovB	+	7	86.4225	94.9785	75.7992	19.1793	0.000580014	0.032187
ctg8-31708919-31713099	BosL1B	+	6	70.9577	76.0656	65.1072	10.9584	0.000575562	0.032187
ctg8-31900455-31900995	BosBovB	+	3	61.3609	70.6948	49.8731	20.8217	0.00015926	0.0223249
ctg8-33807795-33807888	BosBovB	-	3	73.1814	78.3324	67.15	11.1824	0.00178879	0.0484939
ctg8-36509616-36510834	BosBovB	+	7	69.2491	62.9675	76.9527	-13.9852	0.000858483	0.0368467
ctg8-37683829-37685058	BosL1A2	+	3	72.9361	79.0913	65.3556	13.7357	0.00149782	0.0450387
ctg8-37784674-37784794	BosL1A1	+	3	71.0933	63.1686	80.8902	-17.7216	0.000707298	0.0344551
ctg8-38656630-38657510	BosBovB	-	3	41.5547	48.4305	32.8481	15.5824	0.00124915	0.0422702
ctg8-39578119-39579220	BosBovB	-	13	63.9561	57.9611	71.3274	-13.3663	0.000707298	0.0344551
ctg8-41228696-41229148	BosBovB	-	3	76.0601	70.6472	82.9329	-12.2857	0.00100266	0.0393834
ctg8-41809642-41810275	BosBovB	+	5	79.5555	90.669	66.5308	24.1383	5.9973e-05	0.0184022
ctg8-41875729-41877266	BosL1A3	-	35	82.4786	89.125	74.6127	14.5123	4.62101e-05	0.017501
ctg8-42334716-42335749	BosBovB	-	5	86.6923	91.3915	81.1294	10.2621	0.000858483	0.0368467
ctg8-44843399-44844326	BosBovB	-	3	86.7489	94.7437	76.9169	17.8268	0.00158754	0.0475045
ctg8-45552030-45552330	BosL1A5	-	3	81.2306	86.3183	75.3551	10.9631	5.9973e-05	0.0184022
ctg8-45567909-45568499	BosL1A3	-	7	85.9165	91.0789	79.622	11.4569	7.73607e-05	0.0192534
ctg8-45882041-45882554	BosBovB	+	7	65.0943	59.5237	72.2106	-12.6869	0.0013664	0.0450387
ctg8-47507880-47508934	BosL1B	+	6	56.0763	62.3478	48.6262	13.7217	0.000858483	0.0368467
ctg8-47837848-47837978	BosBovB	+	6	71.3229	80.1932	60.5917	19.6016	0.00178879	0.0484939
ctg8-48132876-48133384	BosBovB	-	5	86.1311	92.5709	78.2546	14.3163	0.00038477	0.028234
ctg8-48431587-48434031	BosL1A6	+	10	86.4395	91.1655	80.5304	10.6351	0.000707298	0.0344551
ctg8-49780063-49780658	BosL1A3	-	6	69.6561	81.7147	55.0815	26.6332	0.00124915	0.0422702
ctg8-50223628-50226586	BosBovB	+	13	73.3445	78.1628	67.6635	10.4993	0.00149782	0.0450387
ctg8-50963052-50963704	BosBovB	-	8	35.2797	24.7535	47.737	-22.9835	0.00038477	0.028234
ctg8-51163100-51163332	BosBovB	-	8	85.5113	90.1956	79.826	10.3697	0.000707298	0.0344551
ctg8-52507587-52508960	BosBovB	+	6	76.2197	70.6613	83.489	-12.8277	0.00103778	0.0393834
ctg8-52684071-52684232	BosBovB	+	3	88.092	92.9073	82.1654	10.7419	0.000473624	0.0303043
ctg8-53696800-53697654	BosBovB	+	8	81.9831	87.0704	76.1564	10.914	0.000311152	0.0262875
ctg8-53931375-53931983	BosBovB	+	9	64.61	59.1318	71.4166	-12.2848	0.000311152	0.0262875
ctg8-55295838-55296448	BosBovB	-	4	75.3891	81.2593	68.2288	13.0304	0.00092863	0.0393834
ctg8-56468074-56471463	BosL1A6	-	9	76.2058	81.0812	69.7809	11.3003	0.000473624	0.0303043
ctg8-56474305-56475158	BosL1B	-	3	63.8095	70.6292	55.1688	15.4604	0.00178879	0.0484939
ctg8-57628612-57628861	BosBovB	-	4	63.6818	52.2954	77.9899	-25.6944	0.000126017	0.0210476
ctg8-57666623-57666720	BosBovB	+	4	81.1095	74.5656	89.1635	-14.5978	3.52765e-05	0.0168683
ctg8-57726056-57727320	BosBovB	-	5	67.156	58.5352	77.8492	-19.314	0.000858483	0.0368467
ctg8-58033451-58034532	BosBovB	+	6	77.843	83.322	71.1687	12.1533	3.52765e-05	0.0168683
ctg8-58239194-58242509	BosL1A3	+	6	70.0754	74.6655	64.3667	10.2988	0.00124915	0.0422702
ctg8-58550692-58551866	BosBovB	+	5	84.341	88.8856	78.7477	10.1379	0.00015926	0.0223249
ctg8-58836338-58836823	BosBovB	+	3	75.8609	84.3	65.4744	18.8256	0.000200254	0.0236464
ctg8-58911575-58912106	BosBovB	+	6	84.4286	89.4278	78.8967	10.5311	4.62101e-05	0.017501
ctg8-59375130-59375286	BosBovB	-	6	46.3767	51.3979	40.1968	11.2011	0.00015926	0.0223249
ctg8-59638551-59639082	BosL1B	+	4	87.2897	92.7008	80.6298	12.071	0.000311152	0.0262875
ctg8-60649850-60650524	BosL1A7	-	5	86.915	97.0443	74.3982	22.646	4.62141e-05	0.017501
ctg8-62124833-62125200	BosBovB	-	4	86.4216	95.5969	75.0761	20.5208	0.000673181	0.0344551
ctg8-62657928-62658106	BosL1A3	-	3	23.9931	8.61722	43.2077	-34.5905	0.000793191	0.0368467
ctg8-63831731-63831938	BosBovB	-	11	85.5269	95.212	73.8716	21.3404	0.00178879	0.0484939
ctg8-64190231-64191162	BosL1A6	+	4	81.7011	90.4696	70.3694	20.1002	0.000250236	0.0249233
ctg8-64207705-64208847	BosL1B	+	4	40.7764	32.5836	51.2488	-18.6652	0.000200254	0.0236464
ctg8-64365033-64365164	BosBovB	-	5	86.231	94.1818	76.0715	18.1103	0.00184607	0.0497498
ctg8-64755173-64755894	BosL1B	+	3	87.7107	93.2646	80.5939	12.6706	0.00100122	0.0393834
ctg8-66247035-66247446	BosBovB	+	3	77.5935	83.6063	70.1653	13.4411	0.00108524	0.0407167
ctg8-66996308-66996714	BosL1B	+	3	85.587	92.8084	76.692	16.1164	0.00092863	0.0393834
ctg8-66998581-66999365	BosBovB	-	5	88.5609	94.6871	81.0818	13.6054	0.000488955	0.0309333
ctg8-67000328-67000933	BosBovB	-	4	85.8987	93.1805	76.9365	16.2439	0.000200254	0.0236464
ctg8-67812459-67813150	BosBovB	+	6	72.8797	77.8547	66.898	10.9567	0.00178879	0.0484939
ctg8-68062144-68062356	BosBovB	+	3	72.8302	77.845	66.5882	11.2568	0.00178879	0.0484939
ctg8-69215948-69216170	BosL1B	+	4	74.5274	69.0044	81.7376	-12.7332	0.000200254	0.0236464
ctg8-70593074-70593290	BosBovB	+	9	78.0351	86.0524	68.2048	17.8477	0.000250236	0.0249233
ctg8-71432319-71432621	BosL1A2	+	4	74.5283	80.6304	67.3438	13.2867	0.000580014	0.032187
ctg8-71745152-71746333	BosBovB	-	3	65.8575	72.9578	57.8889	15.0689	0.00038477	0.028234
ctg8-71794252-71795391	BosL1B	+	3	68.8449	81.7106	53.9455	27.7651	7.73607e-05	0.0192534
ctg8-72750593-72751481	BosL1B	+	8	55.7528	43.7981	70.337	-26.5389	0.000473624	0.0303043
ctg8-73134243-73134292	BosBovB	-	3	88.05	93.3104	81.5756	11.7348	0.00103778	0.0393834
ctg8-73825963-73826296	BosL1B	+	7	19.6171	6.30357	36.1632	-29.8596	0.000311152	0.0262875
ctg8-73879240-73879389	BosL1B	-	4	42.2822	50.6289	32.3519	18.277	0.000623067	0.0343867
ctg8-73901882-73901953	BosBovB	-	4	74.6418	84.7078	62.217	22.4908	0.00149782	0.0450387
ctg8-73913461-73914147	BosBovB	+	3	74.0977	80.7438	65.9179	14.8258	9.90217e-05	0.0201357
ctg8-74130859-74131304	BosBovB	+	4	69.9484	80.1773	57.3956	22.7817	0.00149782	0.0450387
ctg8-74546651-74546912	BosL1B	-	3	52.5228	39.8443	68.0359	-28.1916	0.000858483	0.0368467
ctg8-74852038-74852578	BosBovB	-	8	84.863	94.8829	72.9466	21.9363	0.00015926	0.0223249
ctg8-74895088-74895386	BosL1B	+	5	86.5555	96.0266	74.2223	21.8043	0.00158754	0.0475045
ctg8-74899923-74901091	BosL1A6	+	5	54.381	64.8231	41.5292	23.2939	0.000580014	0.032187
ctg8-74959178-74959653	BosBovB	-	6	87.1413	93.001	80.4738	12.5272	0.000858483	0.0368467
ctg8-75432720-75432972	BosBovB	+	7	36.2378	23.9138	52.4174	-28.5036	0.000707298	0.0344551
ctg8-76077864-76078284	BosBovB	-	5	43.4637	37.2589	51.0515	-13.7926	0.000126017	0.0210476
ctg8-79569171-79569649	BosBovB	+	7	66.7767	73.6393	57.9193	15.72	0.00038477	0.028234
ctg8-80937637-80938184	BosL1B	-	4	89.1245	94.254	82.4152	11.8388	4.09643e-06	0.0139836
ctg8-80988529-80989336	BosBovB	-	6	85.6929	90.8785	79.3748	11.5037	0.000311152	0.0262875
ctg8-81054321-81055624	BosL1A3	+	24	78.4424	84.8152	71.1517	13.6635	0.00015926	0.0223249
ctg8-81245757-81247218	BosBovB	-	7	71.6324	65.8241	78.9367	-13.1126	0.000126017	0.0210476
ctg8-81400170-81400811	BosBovB	-	7	88.3167	94.4513	80.7665	13.6849	0.000311152	0.0262875
ctg8-83133843-83135522	BosBovB	-	11	87.9886	92.8738	82.3818	10.4919	2.67594e-05	0.0161846
ctg8-83636492-83636848	BosL1B	-	3	80.8228	87.2812	72.8569	14.4243	3.52765e-05	0.0168683
ctg8-84292366-84292613	BosBovB	+	8	93.0988	97.7824	87.497	10.2855	1.97454e-06	0.0126103
ctg8-85270806-85271012	BosL1B	+	3	75.8731	87.6915	60.927	26.7645	7.73607e-05	0.0192534
ctg8-86325688-86326939	BosL1A6	-	9	78.6007	83.3398	72.7028	10.637	0.000580014	0.032187
ctg8-86875332-86875855	BosBovB	+	6	89.072	93.7096	83.3425	10.3671	7.73607e-05	0.0192534
ctg8-87098426-87098486	BosBovB	+	3	88.6513	95.5744	80.0816	15.4928	0.000856169	0.0368467
ctg8-87301805-87302145	BosBovB	-	4	83.9901	88.5231	78.2619	10.2612	0.00015926	0.0223249
ctg8-87355289-87356661	BosBovB	+	4	75.335	82.4183	67.0438	15.3746	0.000488955	0.0309333
ctg8-87556065-87556178	BosBovB	-	9	87.7586	96.1552	77.1537	19.0015	0.00147414	0.0450387
ctg8-87780743-87780792	BosBovB	+	3	14.0925	2.89375	28.6435	-25.7497	0.000560675	0.032187
ctg8-88446104-88446416	BosL1A6	+	3	84.7377	89.9144	77.6119	12.3026	0.00172167	0.0484939
ctg8-89067851-89070331	BosBovB	-	6	80.6224	85.3743	74.7043	10.67	2.67594e-05	0.0161846
ctg8-89688864-89689260	BosBovB	-	7	68.2821	60.2971	78.0181	-17.721	7.73607e-05	0.0192534
ctg8-89787599-89788059	BosL1B	-	6	89.3759	94.364	83.2244	11.1396	0.000473624	0.0303043
ctg8-91232267-91233358	BosBovB	+	14	80.4106	85.1122	75.1066	10.0057	1.49417e-05	0.014777
ctg8-92216050-92216184	BosBovB	-	3	71.6591	80.5893	60.9397	19.6496	0.000250236	0.0249233
ctg8-92250049-92250482	BosL1A3	-	5	67.5273	76.7823	55.5722	21.21	9.90217e-05	0.0201357
ctg8-92355985-92356047	BosBovB	+	3	82.2868	87.6052	75.741	11.8642	0.00149782	0.0450387
ctg8-92591411-92591968	BosBovB	-	10	64.8002	70.713	57.579	13.134	0.000126017	0.0210476
ctg8-92804436-92805363	BosBovB	-	3	68.8714	74.7959	62.4052	12.3907	0.00149782	0.0450387
ctg8-92818229-92819006	BosBovB	+	4	65.6548	72.5232	57.2119	15.3113	0.00015926	0.0223249
ctg8-92952261-92953458	BosBovB	-	3	74.56	79.3095	68.8824	10.4271	0.000580014	0.032187
ctg8-93198097-93198227	BosBovB	+	4	80.7681	85.7641	74.6192	11.1448	9.90217e-05	0.0201357
ctg8-93480565-93482149	BosBovB	-	5	55.2539	60.2657	49.0419	11.2238	0.00103778	0.0393834
ctg8-94191562-94192385	BosBovB	+	3	57.2437	65.0809	47.5007	17.5802	2.67594e-05	0.0161846
ctg8-94201944-94203277	BosBovB	-	4	65.3117	70.1731	59.3385	10.8347	0.000858483	0.0368467
ctg8-97652811-97653501	BosL1B	+	3	79.8053	86.0451	72.087	13.9581	0.00147414	0.0450387
ctg8-99131790-99132536	BosBovB	-	6	62.6917	57.7057	68.8282	-11.1225	0.00178879	0.0484939
ctg8-101566267-101566666	BosL1B	-	3	58.1586	47.7281	70.9962	-23.268	5.9973e-05	0.0184022
ctg8-101758575-101758621	BosBovB	-	3	80.4924	92.7099	66.9583	25.7516	0.00184843	0.0497955
ctg8-102021737-102021943	BosL1B	+	3	25.8574	9.6025	45.4179	-35.8154	0.000858483	0.0368467
ctg8-102185694-102186743	BosBovB	+	9	87.0069	92.5811	80.3254	12.2557	0.000707298	0.0344551
ctg8-102481823-102482485	BosBovB	-	11	81.9229	92.8225	68.4864	24.3361	4.62101e-05	0.017501
ctg8-104497707-104497895	BosBovB	-	4	66.3333	76.9359	52.5454	24.3906	0.000200254	0.0236464
ctg8-105705428-105705505	BosBovB	+	4	61.7326	54.2167	71.6923	-17.4756	0.00103778	0.0393834
ctg8-105810111-105811118	BosL1B	+	4	78.271	85.9403	69.0349	16.9053	0.000126017	0.0210476
ctg8-106204153-106204627	BosBovB	+	5	82.6256	87.1519	77.0334	10.1184	8.01604e-06	0.0139836
ctg8-106861407-106861832	BosL1B	+	6	81.5997	88.2241	73.3367	14.8874	0.000250089	0.0249233
ctg8-107127669-107127804	BosBovB	-	3	67.0971	60.4802	75.241	-14.7608	3.09259e-05	0.0168683
ctg8-107136850-107137385	BosL1B	+	4	86.5074	93.2031	78.2481	14.955	0.00149782	0.0450387
ctg8-107746925-107747633	BosL1A6	+	3	74.2845	80.0511	67.6308	12.4203	0.00147414	0.0450387
ctg8-108248225-108248886	BosBovB	+	3	65.431	72.7376	56.7379	15.9997	0.000200254	0.0236464
ctg8-108557145-108558895	BosBovB	+	9	72.9243	80.0538	64.9482	15.1056	0.00178879	0.0484939
ctg8-110899344-110899534	BosL1B	+	4	80.228	88.0312	70.624	17.4072	0.00124915	0.0422702
ctg8-111200831-111201209	BosBovB	+	6	66.6939	78.2484	52.2563	25.9921	0.00038477	0.028234
ctg8-112566153-112567426	BosL1A6	-	10	84.7422	89.7426	78.6895	11.0531	0.00178879	0.0484939
ctg8-112629174-112629374	BosL1B	-	3	14.8184	3.54062	28.6987	-25.1581	0.000655793	0.0344551
ctg8-112819962-112821620	BosBovB	+	5	90.7346	97.0052	83.6528	13.3524	0.00108524	0.0407167
ctg8-112943445-112944428	BosBovB	+	3	72.285	79.9318	63.4385	16.4933	2.67594e-05	0.0161846
ctg9-129343-130312	BosBovB	-	5	65.998	70.7794	60.1605	10.6189	0.000858483	0.0368467
ctg9-242635-242891	BosL1A8	+	4	68.4754	73.9626	61.7615	12.2011	0.00103778	0.0393834
ctg9-375945-377700	BosBovB	+	10	71.3018	75.8867	65.7801	10.1066	7.73607e-05	0.0192534
ctg9-383514-386014	BosL1A6	-	6	61.5498	67.568	54.1903	13.3777	0.000707298	0.0344551
ctg9-595946-597158	BosBovB	-	11	82.182	90.6609	71.8644	18.7965	0.00149782	0.0450387
ctg9-836688-837775	BosBovB	+	4	59.3915	65.4357	52.0734	13.3623	4.62101e-05	0.017501
ctg9-884612-886144	BosBovB	+	8	73.2878	78.4766	66.6177	11.8589	1.97454e-06	0.0126103
ctg9-926178-927355	BosBovB	-	5	67.3812	72.7428	60.7271	12.0157	0.00038477	0.028234
ctg9-973724-975031	BosBovB	-	5	63.3945	68.2584	57.471	10.7874	0.000473624	0.0303043
ctg9-1121796-1122485	BosBovB	+	3	52.6063	58.9865	44.7538	14.2326	0.000530614	0.032187
ctg9-1710399-1711258	BosL1A6	+	3	53.8203	60.9132	45.4064	15.5068	0.000126017	0.0210476
ctg9-1715223-1716124	BosL1A6	+	3	67.6275	74.2625	59.2959	14.9666	0.000250236	0.0249233
ctg9-1803631-1805583	BosBovB	+	7	62.2625	67.2684	56.5588	10.7096	0.000311152	0.0262875
ctg9-1917831-1918441	BosL1A3	-	4	69.8825	75.56	62.5017	13.0583	0.000311152	0.0262875
ctg9-1965342-1966337	BosL1B	+	8	57.8894	63.1931	51.1587	12.0344	2.00696e-05	0.0154155
ctg9-2113268-2113841	BosBovB	-	6	65.6244	74.8828	54.5609	20.3219	3.52765e-05	0.0168683
ctg9-2524432-2524689	BosL1A8	-	3	77.4484	82.5965	71.1656	11.4309	0.000580014	0.032187
ctg9-3873502-3875175	BosBovB	-	8	70.0103	74.6559	64.3612	10.2948	0.000707298	0.0344551
ctg9-4525441-4527652	BosL1A3	+	3	70.5626	78.1726	61.404	16.7686	4.62101e-05	0.017501
ctg9-5037290-5039117	BosL1A3	-	7	76.1874	81.0231	70.2198	10.8033	9.90217e-05	0.0201357
ctg9-5226525-5226825	BosL1A2	+	3	56.4381	63.0858	48.6889	14.3969	0.00068698	0.0344551
ctg9-5276530-5279313	BosL1A6	+	6	68.9765	73.7633	63.0297	10.7337	0.000580014	0.032187
ctg9-6531692-6532488	BosL1A6	-	5	59.5234	66.0507	51.4967	14.554	0.000707298	0.0344551
ctg9-6673977-6674497	BosBovB	-	3	60.5446	65.5356	54.4782	11.0574	0.00103778	0.0393834
ctg9-6810888-6814088	BosBovB	+	13	65.5871	70.1837	60.0441	10.1397	1.49417e-05	0.014777
ctg9-7106705-7107223	BosBovB	+	3	67.0608	71.9393	61.3294	10.6099	9.90217e-05	0.0201357
ctg9-7114496-7114771	BosBovB	-	3	75.5778	80.5674	69.687	10.8805	0.000148393	0.0223249
ctg9-7173256-7177424	BosL1A8	-	9	64.4316	70.1664	58.0708	12.0956	0.000126017	0.0210476
ctg9-7661273-7661857	BosBovB	+	5	57.8699	63.2498	51.2087	12.0411	0.00103778	0.0393834
ctg9-8580683-8581072	BosL1B	-	4	31.5536	21.9812	43.5014	-21.5202	0.000311152	0.0262875
ctg9-9103306-9103636	BosBovB	-	4	83.9701	89.5133	77.0329	12.4803	0.000229106	0.0249233
ctg9-9279658-9282062	BosBovB	-	9	71.1126	77.3739	62.8961	14.4778	0.00124915	0.0422702
ctg9-9464587-9464894	BosL1B	+	3	80.3995	88.8396	69.6791	19.1605	0.000707298	0.0344551
ctg9-9472798-9473517	BosBovB	+	4	73.7913	84.1506	60.3562	23.7944	9.90217e-05	0.0201357
ctg9-9681808-9682272	BosBovB	-	5	64.3301	57.6735	72.4938	-14.8203	0.000250236	0.0249233
ctg9-9831764-9832292	BosL1A3	-	18	79.0556	88.3035	67.5865	20.7171	1.49417e-05	0.014777
ctg9-9843927-9844024	BosBovB	+	3	91.531	96.8187	85.0231	11.7957	0.000391908	0.0287298
ctg9-9845430-9846058	BosBovB	+	6	88.6581	95.4342	80.1068	15.3274	0.00149782	0.0450387
ctg9-9909861-9909970	BosBovB	-	6	85.6541	95.4717	73.9004	21.5713	0.000770891	0.0368467
ctg9-10080935-10081002	BosBovB	-	3	65.9781	74.4458	56.709	17.7369	3.52765e-05	0.0168683
ctg9-10509301-10509773	BosL1B	+	5	83.7127	88.9488	77.367	11.5818	0.000311152	0.0262875
ctg9-11730035-11730364	BosL1A3	-	5	15.3066	8.43766	23.6068	-15.1691	0.000210536	0.0245301
ctg9-12603124-12603714	BosBovB	-	3	75.2746	68.9899	82.9795	-13.9896	0.00092863	0.0393834
ctg9-13108975-13109057	BosBovB	+	6	86.0074	96.605	73.8202	22.7847	0.000319544	0.0269663
ctg9-14325738-14327305	BosL1A6	+	3	81.1977	86.0298	75.4872	10.5426	0.000473624	0.0303043
ctg9-15108559-15108658	BosL1B	+	3	87.9397	94.4115	79.9744	14.4371	0.000722647	0.035171
ctg9-15109236-15111990	BosL1B	-	8	79.271	84.8735	72.1545	12.719	0.00178879	0.0484939
ctg9-15158029-15158529	BosBovB	-	6	88.5406	96.1525	79.2831	16.8694	0.00033987	0.028234
ctg9-15272647-15273159	BosBovB	-	6	91.1049	96.1884	84.8374	11.351	0.00103778	0.0393834
ctg9-15544219-15544918	BosL1B	-	3	71.6529	64.3785	80.169	-15.7905	0.00126597	0.0424657
ctg9-15566016-15566859	BosL1B	-	4	85.9335	93.2812	76.0627	17.2185	0.000176916	0.0236464
ctg9-15867921-15868960	BosBovB	+	8	67.8769	75.9143	58.2805	17.6339	2.00696e-05	0.0154155
ctg9-16602872-16604477	BosBovB	-	3	70.384	75.1174	64.8094	10.308	0.00103778	0.0393834
ctg9-16719259-16719305	BosBovB	+	3	79.9228	89.1083	69.0705	20.0378	0.00178879	0.0484939
ctg9-17157878-17159708	BosL1A6	-	12	73.4081	78.4339	67.1396	11.2943	0.000858483	0.0368467
ctg9-17360865-17361591	BosBovB	+	3	73.208	80.5646	64.0609	16.5037	3.52765e-05	0.0168683
ctg9-17490330-17490634	BosBovB	-	3	68.7419	75.3263	60.9782	14.3481	0.000473624	0.0303043
ctg9-18661323-18661935	BosBovB	+	6	63.3565	55.1981	73.4565	-18.2584	0.00124915	0.0422702
ctg9-20151537-20151646	BosL1B	+	5	75.8057	83.3538	65.7417	17.6121	0.00123425	0.0422702
ctg9-22828159-22829029	BosBovB	+	5	71.7285	66.8425	77.68	-10.8375	0.000858483	0.0368467
ctg9-24572827-24573442	BosL1B	+	4	77.9433	83.2148	71.3322	11.8826	0.000126017	0.0210476
ctg9-24818037-24818850	BosBovB	+	3	69.8188	75.4925	62.4248	13.0677	0.000473624	0.0303043
ctg9-26258269-26258679	BosBovB	-	3	86.7529	91.8323	80.5013	11.331	0.00184607	0.0497498
ctg9-28236431-28240767	BosL1A6	-	20	79.3968	85.0667	72.4974	12.5694	2.00696e-05	0.0154155
ctg9-28924075-28925287	BosBovB	+	7	44.1023	32.2159	58.2422	-26.0263	0.000200254	0.0236464
ctg9-29060216-29061121	BosBovB	-	3	76.7862	82.3031	69.9962	12.307	0.00124915	0.0422702
ctg9-32977252-32977287	BosBovB	+	3	84.1	92.5302	73.7244	18.8058	8.01604e-06	0.0139836
ctg9-33430414-33430679	BosBovB	+	7	81.6536	90.0086	71.7073	18.3013	0.00015926	0.0223249
ctg9-33518805-33518962	BosBovB	+	3	82.056	86.7448	75.8042	10.9406	0.000669587	0.0344551
ctg9-33559742-33559947	BosL1A6	-	3	77.3264	83.5865	69.6218	13.9647	0.00124915	0.0422702
ctg9-33625860-33626566	BosBovB	+	3	61.731	67.4635	54.6756	12.7879	0.000580014	0.032187
ctg9-33639609-33639877	BosL1B	-	4	77.9952	85.0958	69.9771	15.1188	0.00184607	0.0497498
ctg9-33781597-33782246	BosBovB	-	9	85.2253	90.7249	78.5103	12.2146	5.9973e-05	0.0184022
ctg9-34934158-34934863	BosL1B	-	3	64.2529	70.1844	56.9526	13.2318	7.73607e-05	0.0192534
ctg9-37055978-37056629	BosBovB	-	6	85.9028	93.6248	76.6686	16.9562	8.01604e-06	0.0139836
ctg9-38539210-38540609	BosBovB	-	8	88.9777	94.4341	82.4229	12.0112	0.00015926	0.0223249
ctg9-38691324-38691672	BosBovB	+	7	87.1296	96.2332	75.9018	20.3314	0.000126017	0.0210476
ctg9-40113243-40113321	BosBovB	+	4	24.1956	15.1984	35.1337	-19.9352	5.9973e-05	0.0184022
ctg9-40526162-40526683	BosL1B	+	9	48.0797	35.6557	63.9666	-28.311	4.62101e-05	0.017501
ctg9-40552785-40552916	BosL1B	+	3	79.5494	91.7365	64.55	27.1865	0.00103778	0.0393834
ctg9-40561125-40561681	BosBovB	-	5	68.5086	61.4844	77.1538	-15.6695	0.000296023	0.0262875
ctg9-41121886-41122629	BosL1B	-	4	89.2133	96.2874	80.6171	15.6702	0.00108524	0.0407167
ctg9-42166916-42168771	BosBovB	-	13	86.1996	91.8144	79.4001	12.4143	0.000200254	0.0236464
ctg9-43024485-43024949	BosL1B	-	3	83.9609	94.15	71.4205	22.7295	0.000731465	0.0355256
ctg9-43440424-43440568	BosBovB	-	9	90.5475	97.0378	82.5594	14.4784	0.000250089	0.0249233
ctg9-43551548-43551716	BosBovB	+	3	88.5365	94.9402	81.1192	13.821	0.000412587	0.0301142
ctg9-44834564-44834768	BosL1B	-	3	84.828	93.1938	74.4818	18.712	0.000580014	0.032187
ctg9-45565011-45565848	BosL1A3	-	14	74.1796	79.0136	68.6061	10.4075	0.00015926	0.0223249
ctg9-46576973-46578076	BosL1B	+	5	68.6655	73.7413	62.3717	11.3696	0.000311152	0.0262875
ctg9-49672540-49673337	BosL1B	-	4	72.1142	77.1584	65.8013	11.3571	0.000296023	0.0262875
[truncated: 3,278 more rows]

## Sheet: S4C_DM_ERV
Table S4C Differentially methylated ERV retrotransposons identified in bovine milk somatic cells related to Subclinical mastitis
ID (a unique identifier based on ERV genomic coordinates, combining chromosome, start, and end positions)	family	strand	n_cpg	mean DNA methylation level in all samples	mean DNA methylation level in samples with S.aureus subclinical masistiis	mean DNA methylation level in controls samples	DNA methylation change	p_value	p_adj
ctg1-220412-220619	BosERV12	+	3	55.1167	59.9125	49.2141	10.6984	0.00015926	0.0168702
ctg1-263578-263775	BosERV12	-	4	79.1578	83.8008	73.4433	10.3575	1.09926e-05	0.0110846
ctg1-494979-495160	BosERV12	+	5	66.8	73.5256	58.5223	15.0033	0.00252352	0.047363
ctg1-531777-532131	BosERV20	+	3	49.8902	56.0927	42.2564	13.8363	0.00149782	0.0369542
ctg1-777196-777384	BosERV20	+	3	79.8827	89.8544	68.3769	21.4775	1.04161e-05	0.0110846
ctg1-793231-793436	BosERV12	-	3	70.4362	76.1044	63.4314	12.673	0.00103778	0.0316416
ctg1-1138484-1138699	BosERV12	+	4	68.6824	77.9884	57.0038	20.9846	0.00038477	0.0220793
ctg1-1138568-1138734	BosERV20	+	3	63.1343	73.8345	49.5332	24.3013	0.00038477	0.0220793
ctg1-1368537-1368650	BosERV12	+	5	86.1164	93.977	76.7474	17.2295	0.000486604	0.0239265
ctg1-1585459-1585759	BosERV20	+	3	91.3479	96.3268	85.2126	11.1142	0.00147414	0.0369542
ctg1-1633728-1633886	BosERV20	-	3	89.605	95.6523	83.4538	12.1985	0.000151706	0.0168702
ctg1-1871936-1872145	BosERV12	-	5	85.8659	93.545	76.4146	17.1304	1.49417e-05	0.0115594
ctg1-1871926-1872020	BosERV19	-	3	89.3385	95.5292	81.7192	13.8099	0.000250089	0.0190715
ctg1-1929766-1929982	BosERV12	+	3	14.3948	3.41146	27.9128	-24.5014	7.10914e-05	0.0146299
ctg1-2050819-2051029	BosERV12	+	3	81.945	89.6246	72.6897	16.9348	0.00252352	0.047363
ctg1-2503889-2504079	BosERV12	-	3	85.5387	90.7275	79.9218	10.8057	0.00252352	0.047363
ctg1-2511605-2511805	BosERV12	-	3	88.3336	93.7018	82.007	11.6948	8.60944e-05	0.0154941
ctg1-3184526-3184964	BosERV6	+	8	75.3061	83.5903	65.815	17.7753	0.00103778	0.0316416
ctg1-3697996-3698384	BosERV20	-	4	42.0266	31.6375	54.7788	-23.1413	0.00015926	0.0168702
ctg1-3721770-3722081	BosERV20	+	7	68.0525	74.8531	59.6824	15.1707	0.00038477	0.0220793
ctg1-3751039-3751175	BosERV20	-	6	91.4733	97.2895	84.1242	13.1652	0.00036041	0.0220793
ctg1-3752634-3752874	BosERV11	-	4	90.1171	95.3393	83.7431	11.5962	0.0015922	0.0387392
ctg1-3834329-3834480	BosERV20	+	3	38.1224	47.1042	27.0679	20.0362	0.00178879	0.0402479
ctg1-3835218-3835311	BosERV11	-	4	57.3451	65.3773	46.8381	18.5392	0.000473624	0.0237007
ctg1-3896569-3896772	BosERV12	-	5	76.4517	86.2844	64.1446	22.1397	0.00103778	0.0316416
ctg1-4267700-4267899	BosERV12	-	3	83.6509	93.4757	72.6564	20.8193	0.000147557	0.0168702
ctg1-4719239-4719372	BosERV20	-	5	75.5093	88.8719	60.3544	28.5176	0.00136487	0.0365303
ctg1-5019409-5019619	BosERV12	-	5	68.631	77.219	58.5985	18.6205	1.09926e-05	0.0110846
ctg1-5778268-5778498	BosERV20	+	3	76.4472	88.1378	61.1758	26.962	0.00101178	0.0316416
ctg1-5870056-5870134	BosERV20	+	3	87.9164	93.2942	81.4359	11.8583	0.00149782	0.0369542
ctg1-6360984-6361220	BosERV20	+	4	56.0108	49.0891	64.5298	-15.4407	0.000858483	0.0290793
ctg1-6422998-6423173	BosERV20	+	5	82.8517	88.1745	77.1251	11.0493	0.00108524	0.0324592
ctg1-6453656-6453861	BosERV12	+	5	83.9541	89.1423	77.1149	12.0274	3.52765e-05	0.0127862
ctg1-6639870-6640071	BosERV12	-	4	74.2376	79.5511	67.8183	11.7329	1.49417e-05	0.0115594
ctg1-6790821-6791600	BosERV2	-	8	43.293	32.9984	56.0151	-23.0167	2.67594e-05	0.011936
ctg1-6843581-6843674	BosERV19	+	4	79.7828	91.0563	65.9077	25.1486	0.00178879	0.0402479
ctg1-6851980-6852090	BosERV19	-	5	46.7399	39.0592	56.0615	-17.0023	0.00212864	0.0436811
ctg1-6860598-6860782	BosERV11	+	3	76.5957	87.5603	63.7615	23.7987	0.00149782	0.0369542
ctg1-6965483-6965677	BosERV12	+	3	75.7084	87.5137	61.8327	25.681	0.00103778	0.0316416
ctg1-7019008-7019105	BosERV20	-	3	82.5851	94.0135	68.5192	25.4943	0.000676282	0.0271592
ctg1-8146663-8147775	BosERV6	-	21	75.1824	84.9479	63.3809	21.567	0.00103778	0.0316416
ctg1-8170781-8171022	BosERV6	+	3	39.3679	25.2665	54.1576	-28.8911	0.00115578	0.0343076
ctg1-8217033-8217228	BosERV12	+	3	74.4695	80.9437	65.7536	15.1901	1.97454e-06	0.00843159
ctg1-10252144-10252340	BosERV20	+	5	87.6932	94.7106	79.1205	15.5901	0.00178879	0.0402479
ctg1-10264720-10264918	BosERV12	-	4	90.5128	95.2046	84.8095	10.3952	0.000580014	0.025158
ctg1-10287449-10287690	BosERV20	+	4	78.3298	89.9939	63.8099	26.1839	0.000250236	0.0190715
ctg1-10287434-10287518	BosERV19	-	6	78.216	89.7693	64.0188	25.7505	0.000580014	0.025158
ctg1-10311127-10311324	BosERV12	-	4	82.9767	91.8102	72.1048	19.7053	0.00149782	0.0369542
ctg1-10428673-10428756	BosERV19	+	7	90.4979	96.6407	82.3785	14.2621	0.000532616	0.025158
ctg1-10798365-10798561	BosERV11	-	8	87.4491	92.1347	81.735	10.3997	0.00178879	0.0402479
ctg1-11298377-11298562	BosERV12	+	3	69.7043	75.4476	62.7192	12.7284	0.00252352	0.047363
ctg1-11499587-11499936	BosERV8	+	4	79.2881	84.0119	73.8942	10.1176	0.00103778	0.0316416
ctg1-11534417-11534955	BosERV6	-	9	79.3222	84.5592	73.1096	11.4495	0.00178879	0.0402479
ctg1-12876243-12876630	BosERV2	+	5	64.2376	68.8066	58.3836	10.423	0.00178879	0.0402479
ctg1-12880309-12881441	BosERV2	+	5	64.9787	71.4806	57.4216	14.059	0.00103778	0.0316416
ctg1-14819088-14819318	BosERV20	+	3	70.7978	77.7978	62.3348	15.4629	0.00158966	0.0387014
ctg1-16133116-16134410	BosERV16	-	16	75.8502	81.259	69.0553	12.2037	0.000311152	0.0207088
ctg1-19306817-19307088	BosERV20	-	5	86.8314	94.7673	77.304	17.4633	0.00103778	0.0316416
ctg1-19307588-19307829	BosERV20	-	4	83.1599	95.4219	68.0683	27.3536	0.00158966	0.0387014
ctg1-19338790-19338989	BosERV12	+	5	85.6437	97.55	72.1095	25.4405	0.00157908	0.0386752
ctg1-19340151-19340352	BosERV12	-	6	66.6195	79.124	51.2295	27.8945	0.000126017	0.015996
ctg1-19550892-19551100	BosERV12	+	3	73.6855	84.4264	61.9756	22.4507	0.000473624	0.0237007
ctg1-20645451-20645653	BosERV12	+	4	76.8091	84.0717	67.5877	16.484	0.00178879	0.0402479
ctg1-21093453-21093579	BosERV19	+	5	61.5425	54.5482	70.0563	-15.5081	0.00211737	0.0436811
ctg1-21374952-21375188	BosERV20	+	6	68.8787	60.7332	78.8064	-18.0732	5.9973e-05	0.0136462
ctg1-21905024-21905150	BosERV19	-	4	80.6367	91.5948	67.3587	24.2361	0.000200254	0.0180833
ctg1-22199475-22199708	BosERV11	+	8	84.5032	92.6359	74.4938	18.1422	4.62101e-05	0.013545
ctg1-22913411-22913516	BosERV12	-	4	90.1653	96.5944	82.3161	14.2782	0.000174001	0.0180833
ctg1-23391454-23391653	BosERV12	+	6	72.261	78.3422	64.7025	13.6397	0.00149782	0.0369542
ctg1-23391538-23391668	BosERV20	+	3	77.7135	84.3488	69.8661	14.4826	0.000624034	0.0267477
ctg1-23451133-23451331	BosERV12	+	3	57.605	64.0071	49.6853	14.3218	0.000580014	0.025158
ctg1-23497846-23498143	BosERV20	+	5	77.5955	89.1738	64.8333	24.3406	0.000250089	0.0190715
ctg1-23523850-23524058	BosERV12	-	4	71.3243	64.2406	79.3933	-15.1527	0.000200254	0.0180833
ctg1-23629305-23629502	BosERV12	+	3	46.9589	37.5708	58.9991	-21.4283	0.00178879	0.0402479
ctg1-24816511-24816714	BosERV12	-	6	77.867	85.9925	68.3237	17.6688	0.000200254	0.0180833
ctg1-24973783-24973872	BosERV11	-	4	77.9629	87.2687	66.5096	20.7591	0.000311152	0.0207088
ctg1-24982827-24982995	BosERV12	-	3	69.7845	64.9844	75.833	-10.8486	0.00178879	0.0402479
ctg1-25569154-25569359	BosERV12	+	4	86.2783	81.5041	91.8209	-10.3168	0.000488955	0.0239265
ctg1-26257445-26257574	BosERV11	-	4	71.3091	85.0622	56.2229	28.8393	0.00147813	0.0369542
ctg1-26257439-26257557	BosERV20	+	3	69.7329	84.1163	53.5722	30.544	0.000190114	0.0180833
ctg1-26282529-26282805	BosERV20	-	8	82.6307	88.5537	75.5392	13.0145	5.9973e-05	0.0136462
ctg1-26996521-26996661	BosERV12	+	3	69.2816	76.8281	59.9936	16.8345	9.90217e-05	0.0154941
ctg1-28008899-28009013	BosERV12	-	3	78.0385	86.6	67.5013	19.0987	0.000858483	0.0290793
ctg1-28380187-28380505	BosERV12	+	3	74.1718	78.6702	68.524	10.1462	0.000707298	0.0271592
ctg1-28431597-28431807	BosERV12	-	3	78.3902	83.2052	72.4641	10.7411	0.000858483	0.0290793
ctg1-28596988-28597216	BosERV12	-	6	87.9419	94.4219	80.2692	14.1527	0.000147557	0.0168702
ctg1-29032561-29032786	BosERV12	+	4	81.7328	88.1819	73.7503	14.4316	0.00178879	0.0402479
ctg1-29661553-29661763	BosERV12	+	6	89.0568	94.8447	82.0016	12.8431	0.000580014	0.025158
ctg1-34482367-34484530	BosERV4	+	7	57.4402	62.2232	51.7962	10.4271	0.00124915	0.0343076
ctg1-34495144-34495393	BosERV20	-	7	70.9058	77.6929	62.997	14.696	0.000200254	0.0180833
ctg1-34809239-34809697	BosERV6	-	9	78.4229	84.1564	71.522	12.6344	0.00149782	0.0369542
ctg1-35486904-35487450	BosERV6	-	10	83.843	88.3758	78.2409	10.1349	0.000858483	0.0290793
ctg1-35605800-35607188	BosERV15	+	10	80.1238	88.8234	69.4162	19.4072	0.000126017	0.015996
ctg1-35955580-35955897	BosERV12	-	3	87.3391	92.2422	81.4468	10.7954	0.0013664	0.0365303
ctg1-36018890-36019091	BosERV12	-	6	78.8597	92.8546	62.3132	30.5414	0.000200254	0.0180833
ctg1-36636626-36637146	BosERV6	+	8	71.8389	82.0607	59.3821	22.6787	0.000126017	0.015996
ctg1-37655375-37656669	BosERV16	+	15	69.0552	78.3813	57.2176	21.1637	4.62101e-05	0.013545
ctg1-38289573-38289804	BosERV12	+	4	78.2737	90.2461	63.5385	26.7076	0.000858436	0.0290793
ctg1-42115672-42115807	BosERV19	-	4	85.2427	94.4086	73.9615	20.4471	9.90217e-05	0.0154941
ctg1-45039967-45040067	BosERV12	+	3	83.3929	90.3979	73.5203	16.8776	0.00235655	0.047063
ctg1-45903468-45903708	BosERV12	-	6	84.6666	79.4123	91.3058	-11.8935	5.59944e-07	0.00843159
ctg1-46059961-46060168	BosERV12	+	3	69.4287	77.15	59.9256	17.2244	0.000707298	0.0271592
ctg1-46118898-46119234	BosERV20	-	4	62.3926	53.5844	73.8881	-20.3037	4.62101e-05	0.013545
ctg1-46285934-46286162	BosERV12	-	7	91.6923	96.4869	86.2214	10.2654	4.09643e-06	0.00863027
ctg1-48762917-48763116	BosERV12	+	3	70.2579	80.3892	57.7154	22.6739	0.000707298	0.0271592
ctg1-50025303-50025516	BosERV12	-	5	90.7244	96.1316	84.2462	11.8855	0.000250236	0.0190715
ctg1-51483648-51484938	BosERV16	+	25	83.5061	89.435	75.8078	13.6272	1.49417e-05	0.0115594
ctg1-52009232-52009512	BosERV20	-	3	82.9425	88.4979	76.1051	12.3928	0.00103778	0.0316416
ctg1-53405300-53405435	BosERV20	+	3	84.9233	90.9683	77.6614	13.3068	0.0017067	0.0402479
ctg1-53508919-53509114	BosERV12	+	3	80.2879	89.3688	68.8339	20.5349	0.000126017	0.015996
ctg1-53578394-53578531	BosERV11	+	5	86.8058	92.4782	80.01	12.4682	0.000200254	0.0180833
ctg1-53779036-53779197	BosERV12	-	3	75.1519	81.3534	67.9951	13.3583	0.00178879	0.0402479
ctg1-54357723-54357952	BosERV12	+	3	82.9063	88.7036	76.2028	12.5008	0.0023568	0.047064
ctg1-55781102-55781195	BosERV11	-	4	73.7594	86.7594	56.426	30.3333	1.78819e-05	0.0117801
ctg1-56659975-56660174	BosERV12	+	4	82.822	89.4633	74.6481	14.8152	0.000580014	0.025158
ctg1-56826436-56826538	BosERV11	-	5	84.0374	95.3465	70.4469	24.8996	0.000246148	0.0190715
ctg1-57237815-57237932	BosERV20	+	4	80.2247	94.931	62.5836	32.3475	2.99956e-05	0.0127862
ctg1-57338347-57338646	BosERV20	-	6	29.4117	19.3085	41.8718	-22.5633	0.00252352	0.047363
ctg1-58299169-58299395	BosERV12	-	4	87.4628	94.4608	78.9452	15.5156	0.00266198	0.0490488
ctg1-59117739-59118004	BosERV20	-	10	89.5425	95.0766	82.7059	12.3707	7.73607e-05	0.0146299
ctg1-59232230-59232324	BosERV12	+	7	79.1985	92.9271	62.7132	30.2139	1.09926e-05	0.0110846
ctg1-64412650-64412849	BosERV12	+	4	85.6323	90.5492	79.5808	10.9684	0.00178879	0.0402479
ctg1-64803570-64803761	BosERV12	+	3	86.6781	92.294	79.9491	12.3449	0.000793191	0.0290793
ctg1-64841600-64841723	BosERV12	+	3	92.2569	97.4229	85.8987	11.5242	0.00214765	0.0437766
ctg1-64905144-64905313	BosERV11	-	7	27.2564	14.8826	43.2005	-28.3179	0.000250236	0.0190715
ctg1-65101155-65101359	BosERV12	+	3	88.9311	95.6558	80.5679	15.0878	0.00211301	0.0436811
ctg1-65756799-65757000	BosERV12	+	3	82.5967	90.4938	73.0808	17.4131	0.00015926	0.0168702
ctg1-66377093-66377314	BosERV12	+	5	87.7741	94.6625	79.2962	15.3663	0.00178879	0.0402479
ctg1-66595074-66595283	BosERV12	-	5	80.4628	88.307	70.9892	17.3177	0.000580014	0.025158
ctg1-67232321-67232448	BosERV19	-	4	90.7069	96.5687	83.4923	13.0764	0.000769729	0.0290793
ctg1-67785727-67785932	BosERV12	-	6	89.3702	93.855	83.8134	10.0416	0.00124915	0.0343076
ctg1-67785714-67785815	BosERV19	-	3	84.2374	92.4229	74.1628	18.2601	0.000580014	0.025158
ctg1-67950396-67950571	BosERV12	-	7	75.253	85.9432	62.329	23.6141	0.000473624	0.0237007
ctg1-68219996-68220197	BosERV12	-	3	77.2515	85.5073	66.8397	18.6675	0.00212864	0.0436811
ctg1-68544121-68544312	BosERV12	+	3	91.5764	96.0854	86.0269	10.0585	0.0012329	0.0343076
ctg1-68975081-68975294	BosERV12	+	3	75.0563	82.5875	65.7872	16.8003	0.00149782	0.0369542
ctg1-69469175-69469373	BosERV20	+	4	44.272	33.7188	57.2606	-23.5418	0.00149782	0.0369542
ctg1-70172962-70173175	BosERV12	+	6	49.2357	57.2816	38.7784	18.5032	0.00038477	0.0220793
ctg1-70678042-70678332	BosERV20	-	5	49.8749	45.1085	55.8062	-10.6977	0.00149782	0.0369542
ctg1-70748144-70748353	BosERV12	+	3	88.0437	97.0083	77.0103	19.9981	0.00228818	0.0460661
ctg1-71009540-71009675	BosERV12	-	3	40.6163	24.8099	59.2192	-34.4094	0.000473624	0.0237007
ctg1-72941589-72941782	BosERV12	+	3	88.9695	95.8937	79.7668	16.127	0.00136453	0.0365303
ctg1-73049337-73049663	BosERV20	+	12	79.4263	88.8947	68.0061	20.8886	0.000148393	0.0168702
ctg1-73887064-73887351	BosERV12	+	6	71.887	81.3564	61.29	20.0664	0.00124915	0.0343076
ctg1-74111632-74111774	BosERV12	+	3	92.2569	97.0948	86.3026	10.7922	3.95004e-05	0.013545
ctg1-74787007-74787135	BosERV20	+	4	78.6629	83.1477	73.1433	10.0044	0.000473624	0.0237007
ctg1-75045611-75045742	BosERV12	+	5	85.3845	92.1377	77.0322	15.1054	0.000126017	0.015996
ctg1-75488820-75488965	BosERV20	-	3	81.8673	87.6063	74.6675	12.9387	0.000580014	0.025158
ctg1-77620271-77620499	BosERV20	-	5	76.3492	69.2576	84.9356	-15.678	0.00015926	0.0168702
ctg1-78200564-78200969	BosERV20	+	3	72.208	78.4885	64.4782	14.0103	0.00252352	0.047363
ctg1-78321770-78322087	BosERV20	-	4	60.0382	64.703	54.6111	10.0919	0.00252352	0.047363
ctg1-78733479-78733845	BosERV20	-	3	78.143	72.7458	84.7129	-11.9671	0.00266198	0.0490488
ctg1-79025828-79025959	BosERV19	+	4	83.5966	94.6804	70.1683	24.5121	0.000793191	0.0290793
ctg1-79349364-79349518	BosERV20	+	3	71.1529	64.6562	79.1487	-14.4925	0.00178879	0.0402479
ctg1-79729502-79729700	BosERV12	-	3	87.5775	92.2754	81.7484	10.5271	0.00234679	0.0469038
ctg1-79961849-79962046	BosERV12	+	4	83.3768	90.6586	74.5712	16.0875	1.09926e-05	0.0110846
ctg1-79961976-79962097	BosERV20	-	3	87.5167	94.5104	78.909	15.6014	0.000413947	0.0231235
ctg1-80375061-80377710	BosERV10	-	33	76.7249	82.9462	69.089	13.8572	0.00015926	0.0168702
ctg1-80852405-80852516	BosERV20	+	3	48.8362	40.0594	59.6385	-19.5791	0.000311152	0.0207088
ctg1-81617562-81617657	BosERV12	-	4	69.397	77.1437	59.8625	17.2812	0.000200254	0.0180833
ctg1-81628773-81628964	BosERV12	-	4	42.0842	31.8078	54.4096	-22.6018	0.00149782	0.0369542
ctg1-82065651-82065975	BosERV9	-	10	91.3903	96.0573	85.6602	10.3972	0.00149782	0.0369542
ctg1-82501279-82501476	BosERV12	+	3	85.8186	95.0784	74.0415	21.0369	0.00198042	0.0434352
ctg1-82627432-82627508	BosERV20	-	4	78.175	93.3461	59.5029	33.8432	0.000225856	0.0190715
ctg1-83010848-83011202	BosERV12	-	4	65.427	69.8695	59.7639	10.1056	0.00103778	0.0316416
ctg1-83162929-83163307	BosERV20	+	6	87.7697	92.5517	81.7442	10.8075	0.00178879	0.0402479
ctg1-83598057-83598174	BosERV20	+	4	86.0444	93.4959	76.409	17.0869	0.00198042	0.0434352
ctg1-84808059-84808285	BosERV20	-	5	84.9399	90.2989	78.3654	11.9335	0.00124915	0.0343076
ctg1-85578072-85578271	BosERV12	-	5	64.5256	75.7034	51.0231	24.6803	0.00178879	0.0402479
ctg1-85719002-85719187	BosERV12	+	3	81.1741	85.7271	75.5705	10.1566	0.00149782	0.0369542
ctg1-86194838-86195066	BosERV12	+	3	78.8615	87.7113	68.7126	18.9987	2.00696e-05	0.0117801
ctg1-86307555-86307758	BosERV12	-	3	65.8089	71.6715	58.7846	12.8868	0.00149782	0.0369542
ctg1-87569231-87569430	BosERV20	+	3	86.4878	91.3478	80.7732	10.5746	0.000708506	0.0272012
ctg1-88054649-88054834	BosERV20	+	4	77.3756	84.5521	68.8937	15.6584	0.000473624	0.0237007
ctg1-88406558-88406752	BosERV20	-	7	83.653	89.7179	76.1885	13.5294	0.00038477	0.0220793
ctg1-88408741-88408882	BosERV12	-	5	66.1514	75.4262	54.7362	20.6901	0.000311152	0.0207088
ctg1-88429309-88429423	BosERV12	+	5	11.9122	4.15942	21.3562	-17.1967	2.67594e-05	0.011936
ctg1-88644033-88645336	BosERV5	+	9	74.1033	79.4998	67.6592	11.8406	0.0024763	0.047363
ctg1-90142876-90143081	BosERV12	+	4	80.9164	93.5839	66.167	27.4169	5.02609e-05	0.0136462
ctg1-90142992-90143098	BosERV19	+	4	80.9164	93.5839	66.167	27.4169	5.02609e-05	0.0136462
ctg1-90152342-90152601	BosERV20	+	4	71.8178	67.1383	77.7521	-10.6138	0.00212864	0.0436811
ctg1-90646346-90646522	BosERV20	+	3	72.7273	79.1862	65.0569	14.1292	2.67594e-05	0.011936
ctg1-95320574-95320697	BosERV12	-	4	88.2723	96.3711	78.7139	17.6571	0.000620975	0.0267477
ctg1-95781958-95782177	BosERV12	+	4	88.8664	95.1797	81.0962	14.0835	5.9973e-05	0.0136462
ctg1-96629345-96629435	BosERV20	+	3	54.704	61.7344	46.0513	15.6831	0.00212864	0.0436811
ctg1-96919625-96919812	BosERV12	-	4	88.721	94.5025	81.8442	12.6583	0.001255	0.0343076
ctg1-97178010-97178198	BosERV12	-	5	42.8852	31.2369	57.2215	-25.9847	2.00696e-05	0.0117801
ctg1-97212382-97212552	BosERV20	+	4	90.1599	96.8641	81.5814	15.2827	0.00167092	0.0402479
ctg1-97213859-97214060	BosERV12	-	6	91.3937	96.5932	84.9942	11.599	0.00252352	0.047363
ctg1-98575995-98576093	BosERV19	-	4	83.5536	95.4103	70.1878	25.2225	0.00145628	0.0369542
ctg1-99449895-99450089	BosERV12	-	3	76.5467	89.6362	60.2305	29.4056	2.67594e-05	0.011936
ctg1-99527912-99528062	BosERV12	-	3	78.8892	86.1525	70.209	15.9435	0.00252352	0.047363
ctg1-99602132-99602329	BosERV12	-	5	80.5037	85.9534	73.8912	12.0622	0.000311152	0.0207088
ctg1-100299644-100299853	BosERV20	+	5	81.3814	91.3413	69.1231	22.2182	0.000473624	0.0237007
ctg1-100624523-100624609	BosERV19	+	3	77.2729	87.8687	66.9048	20.9639	0.000820448	0.0290793
ctg1-102369419-102369754	BosERV4	-	3	65.0172	69.5656	59.3444	10.2212	0.00212864	0.0436811
ctg1-103441503-103441800	BosERV17	-	4	64.855	59.0077	72.1769	-13.1693	0.00103778	0.0316416
ctg1-105978399-105978564	BosERV12	-	3	86.4315	93.6167	79.1487	14.4679	2.67594e-05	0.011936
ctg1-106662796-106662991	BosERV12	+	8	82.4308	91.4541	71.7105	19.7436	0.000250236	0.0190715
ctg1-106758614-106758731	BosERV12	+	3	76.3914	80.9385	70.7949	10.1437	0.00252352	0.047363
ctg1-107446413-107446790	BosERV20	-	3	83.825	90.289	75.5476	14.7414	0.000707298	0.0271592
ctg1-107571156-107571520	BosERV20	-	3	48.9994	40.3539	59.6323	-19.2784	0.000580014	0.025158
ctg1-107666701-107666914	BosERV12	+	4	76.4415	88.0624	62.805	25.2574	0.000707298	0.0271592
ctg1-108122126-108122324	BosERV12	+	4	61.4168	69.4352	51.5481	17.8871	0.00212864	0.0436811
ctg1-108823086-108823406	BosERV12	+	3	31.5488	24.1291	40.8904	-16.7613	0.00015926	0.0168702
ctg1-109525017-109525356	BosERV4	-	3	67.7471	74.4031	59.5551	14.848	0.000473624	0.0237007
ctg1-109913029-109914322	BosERV16	-	7	84.3938	89.3302	78.7596	10.5705	0.000473624	0.0237007
ctg1-113507804-113508010	BosERV12	-	5	78.7093	90.6587	64.0023	26.6564	0.000311152	0.0207088
ctg1-114689085-114689283	BosERV12	-	6	90.611	95.4109	84.6346	10.7763	0.00124915	0.0343076
ctg1-115566836-115567048	BosERV12	-	3	47.8448	39.001	58.7295	-19.7284	0.000126017	0.015996
ctg1-116062336-116062432	BosERV12	-	3	83.0191	90.6779	73.741	16.9369	0.00092863	0.0308531
ctg1-116352600-116353134	BosERV6	+	8	86.9083	91.7396	81.1688	10.5708	8.01604e-06	0.0103358
ctg1-116868955-116869096	BosERV12	+	5	84.7486	96.5938	70.17	26.4237	0.00126071	0.0343076
ctg1-116868988-116869187	BosERV12	-	7	88.131	96.8433	77.4082	19.4351	0.00214001	0.0436811
ctg1-117112172-117112251	BosERV11	-	4	83.2995	93.441	71.9375	21.5035	0.0007814	0.0290793
ctg1-117300459-117300662	BosERV12	-	3	79.3684	87.6167	68.7304	18.8863	0.00038477	0.0220793
ctg1-117521356-117521455	BosERV12	-	5	81.9306	94.2122	67.2615	26.9507	0.000667008	0.0271592
ctg1-117610930-117611217	BosERV20	-	7	25.1822	10.1584	43.3351	-33.1767	0.000200254	0.0180833
ctg1-117681580-117681733	BosERV20	-	3	69.796	64.9958	75.7038	-10.708	0.000488955	0.0239265
ctg1-117868970-117869086	BosERV19	-	4	85.8032	93.1943	76.4651	16.7291	0.00214001	0.0436811
ctg1-118183906-118184109	BosERV12	-	6	81.7217	92.378	67.8181	24.5599	0.000624034	0.0267477
ctg1-118345347-118345627	BosERV20	-	5	10.2469	1.92745	20.1242	-18.1967	0.00130376	0.0352913
ctg1-118498703-118498773	BosERV20	-	4	83.4847	93.8789	70.3574	23.5215	0.000575562	0.025158
ctg1-118512903-118513102	BosERV12	+	5	81.7841	76.88	87.82	-10.94	0.000580014	0.025158
ctg1-118626027-118626340	BosERV12	+	5	82.3515	89.301	74.0149	15.2861	0.00124915	0.0343076
ctg1-118647216-118647409	BosERV12	-	4	76.7897	87.7008	63.3606	24.3402	0.0024763	0.047363
ctg1-118648128-118648257	BosERV20	+	3	86.2356	93.3521	77.4769	15.8752	0.00149782	0.0369542
ctg1-118790631-118790831	BosERV12	+	3	89.0361	93.7034	83.0241	10.6793	0.00198806	0.0434352
ctg1-118962970-118963161	BosERV12	+	3	62.347	68.9289	54.1493	14.7796	0.00015926	0.0168702
ctg1-119154784-119154938	BosERV12	-	4	70.5409	59.5187	85.3241	-25.8054	0.000580014	0.025158
ctg1-119344688-119344824	BosERV20	-	3	88.281	95.9807	79.1571	16.8236	0.00095436	0.0316416
ctg1-119344703-119344904	BosERV12	-	5	88.9586	94.7778	82.0081	12.7697	0.000272385	0.0205341
ctg1-119618240-119618630	BosERV20	+	3	71.194	78.5521	62.5436	16.0085	0.00038477	0.0220793
ctg1-122233100-122234391	BosERV16	-	6	78.0909	87.7601	65.7069	22.0532	0.000580014	0.025158
ctg1-123015556-123015638	BosERV3	-	4	78.2473	87.2621	67.3389	19.9231	9.90217e-05	0.0154941
ctg1-123960995-123961204	BosERV12	-	3	75.443	80.2556	69.5254	10.7302	0.00212864	0.0436811
ctg1-125000643-125000713	BosERV20	-	3	60.5533	49.9997	73.624	-23.6243	0.000250236	0.0190715
ctg1-125073279-125073342	BosERV19	+	4	41.7599	32.7266	52.8779	-20.1513	0.00149782	0.0369542
ctg1-125855209-125855337	BosERV20	-	3	80.6359	87.6667	71.775	15.8917	0.00149782	0.0369542
ctg1-126720046-126720212	BosERV12	-	3	89.6905	96.523	82.0923	14.4307	0.00217864	0.0443853
ctg1-126730583-126730692	BosERV12	+	4	86.2491	95.7039	74.6125	21.0914	0.00224827	0.0455912
ctg1-127569526-127569739	BosERV12	-	5	75.8	84.8388	64.6754	20.1634	0.00038477	0.0220793
ctg1-127569514-127569611	BosERV19	-	4	73.2457	82.8727	61.3971	21.4755	0.000200254	0.0180833
ctg1-127659936-127660139	BosERV12	+	6	15.1754	6.19115	26.551	-20.3598	0.000858483	0.0290793
ctg1-127660024-127660193	BosERV19	+	5	14.1892	2.00188	29.7196	-27.7177	0.000171121	0.0179536
ctg1-128032443-128032522	BosERV20	-	4	63.2571	56.4469	72.0328	-15.5859	0.000700448	0.0271592
ctg1-128225230-128225708	BosERV2	-	6	85.0901	89.8022	79.7887	10.0135	0.000250236	0.0190715
ctg1-128560970-128561177	BosERV12	+	3	74.335	80.7641	66.2371	14.527	0.000250236	0.0190715
ctg1-128742630-128742717	BosERV20	-	4	50.5746	60.2116	39.0614	21.1502	0.00252352	0.047363
ctg1-129055832-129055907	BosERV20	+	3	84.2078	93.7895	72.0813	21.7082	0.000621799	0.0267477
ctg1-129055842-129056063	BosERV12	-	4	79.004	88.1	67.5688	20.5311	5.9973e-05	0.0136462
ctg1-130316839-130317056	BosERV12	+	3	86.3093	94.0021	76.4355	17.5666	0.000793191	0.0290793
ctg1-130316957-130317076	BosERV19	+	3	84.8205	93.7607	73.3554	20.4052	0.00135893	0.0365303
ctg1-130669271-130669945	BosERV16	+	13	74.1415	86.2562	60.089	26.1671	0.00178879	0.0402479
ctg1-131871936-131872087	BosERV19	+	3	52.5557	57.8969	45.5519	12.345	0.00124915	0.0343076
ctg1-132151270-132151462	BosERV12	+	3	83.2787	89.4646	75.6654	13.7992	0.00124915	0.0343076
ctg1-132196474-132196700	BosERV12	+	4	55.6956	45.4141	68.603	-23.1889	0.00149782	0.0369542
ctg1-133330741-133330940	BosERV12	+	3	88.2529	93.475	81.8256	11.6494	0.000311152	0.0207088
ctg1-133618928-133619149	BosERV12	-	5	81.2321	87.5533	72.8136	14.7397	0.00015926	0.0168702
ctg1-133618913-133619051	BosERV20	-	3	79.8216	87.1167	69.9878	17.1288	0.00149782	0.0369542
ctg1-133783653-133783889	BosERV12	+	3	73.2983	79.6653	65.5397	14.1256	0.000858483	0.0290793
ctg1-134859087-134859192	BosERV12	+	5	74.5235	83.8269	62.8448	20.9821	0.00124915	0.0343076
ctg1-135614114-135614322	BosERV12	-	5	76.7414	89.0873	62.4251	26.6621	0.00149782	0.0369542
ctg1-135961086-135961254	BosERV11	-	3	91.2085	96.9262	84.1528	12.7734	0.000207143	0.0184471
ctg1-137322637-137322936	BosERV20	+	6	82.7268	88.0656	75.8347	12.2309	0.00124915	0.0343076
ctg1-137540610-137540805	BosERV12	+	4	65.3745	71.5533	57.8128	13.7406	0.000707298	0.0271592
ctg1-137623476-137623665	BosERV12	-	4	74.4737	80.8469	67.0896	13.7573	0.00149782	0.0369542
ctg1-137666174-137666269	BosERV11	+	3	75.9787	81.2469	69.4949	11.752	0.000858483	0.0290793
ctg1-137982399-137982608	BosERV12	-	3	68.075	76.1074	58.3236	17.7838	0.000311152	0.0207088
ctg1-138299060-138299382	BosERV12	-	3	61.5364	70.52	52.0193	18.5007	0.00124915	0.0343076
ctg1-138367599-138368981	BosERV4	+	8	70.7805	76.5215	63.7498	12.7717	0.000707298	0.0271592
ctg1-138368986-138371105	BosERV3	+	11	54.3657	58.8495	48.6322	10.2173	0.000858483	0.0290793
ctg1-138563123-138564421	BosERV16	-	24	51	55.9458	44.9109	11.0349	0.00103778	0.0316416
ctg1-138991395-138991605	BosERV12	+	3	38.7523	23.0979	58.0192	-34.9213	0.000322675	0.0212617
ctg1-139184929-139185299	BosERV20	-	5	66.3815	71.6105	59.8274	11.7832	0.00038477	0.0220793
ctg1-139709128-139709291	BosERV12	+	5	54.7014	63.454	44.6023	18.8517	2.67594e-05	0.011936
ctg1-139728979-139729175	BosERV12	+	3	66.4216	76.0609	56.8846	19.1763	0.00106965	0.0324592
ctg1-139887697-139888020	BosERV20	-	6	79.4842	87.7147	69.575	18.1397	4.11811e-05	0.013545
ctg1-140329876-140330264	BosERV20	-	3	73.5504	78.1407	67.8372	10.3035	0.000311152	0.0207088
ctg1-140563808-140563940	BosERV20	-	3	75.5206	83.2478	66.5744	16.6734	7.73607e-05	0.0146299
ctg1-140893121-140893320	BosERV12	+	3	64.3787	70.2687	57.1295	13.1393	0.00178879	0.0402479
ctg1-140900477-140900627	BosERV20	+	4	78.5279	85.2106	69.9396	15.271	0.00178879	0.0402479
ctg1-141800304-141800612	BosERV20	+	4	73.4701	85.8397	58.7917	27.048	7.73607e-05	0.0146299
ctg1-141923660-141923858	BosERV12	-	4	74.6742	83.9176	62.9244	20.9932	0.00124915	0.0343076
ctg1-141973651-141973849	BosERV11	-	3	80.9735	89.3995	70.9667	18.4328	9.90217e-05	0.0154941
ctg1-142055539-142055865	BosERV20	+	3	46.6156	31.0092	64.1739	-33.1647	0.00103778	0.0316416
ctg1-142201952-142202031	BosERV20	+	3	77.0341	94.4756	55.6481	38.8275	0.000474196	0.0237007
ctg1-142386962-142387086	BosERV12	-	4	83.9668	94.1828	71.3933	22.7895	0.001156	0.0343076
ctg1-142428017-142429489	BosERV17	-	16	83.1214	90.4694	74.3473	16.1222	0.00178879	0.0402479
ctg1-142435082-142435280	BosERV20	-	3	81.4508	92.6193	67.9987	24.6206	0.000250236	0.0190715
ctg1-142608716-142609039	BosERV20	+	7	34.0259	21.1287	49.0062	-27.8775	0.00126597	0.0343076
ctg1-142670232-142670311	BosERV20	-	5	84.8872	94.3637	73.2238	21.1399	0.00264905	0.0490488
ctg1-142778575-142778758	BosERV12	-	5	87.27	94.0283	79.5455	14.4828	0.00212864	0.0436811
ctg1-142885270-142885477	BosERV12	-	3	81.8639	93.2677	67.0158	26.2519	0.00103778	0.0316416
ctg1-142885258-142885355	BosERV19	-	3	81.8639	93.2677	67.0158	26.2519	0.00103778	0.0316416
ctg1-142915758-142915894	BosERV11	-	7	41.4816	30.3674	55.1522	-24.7848	0.000311152	0.0207088
ctg1-142915805-142915910	BosERV20	+	6	42.3752	30.6479	56.672	-26.0241	0.000126017	0.015996
ctg1-142988135-142988292	BosERV19	+	6	71.6384	79.0364	62.517	16.5194	0.0017112	0.0402479
ctg1-143076814-143078105	BosERV16	-	15	91.0026	96.3699	84.8371	11.5329	0.000311152	0.0207088
ctg1-143115814-143115994	BosERV12	+	5	27.7018	17.1262	40.8068	-23.6805	0.000473624	0.0237007
ctg1-143347999-143348105	BosERV12	-	4	89.0985	93.9274	83.1503	10.7771	0.000707298	0.0271592
ctg1-143376322-143376461	BosERV20	+	5	23.8635	15.2351	33.8738	-18.6387	0.000200254	0.0180833
ctg1-143606757-143606856	BosERV12	-	3	88.333	94.9645	80.3205	14.644	0.000380922	0.0220793
ctg1-143626684-143626855	BosERV20	+	3	53.8412	73.4476	31.8606	41.5869	0.000425305	0.0236909
ctg1-143701580-143701784	BosERV12	-	6	85.3756	94.0994	74.7152	19.3842	0.000176916	0.0180833
ctg1-143785369-143785578	BosERV2	-	6	79.1096	95.085	60.1817	34.9033	0.000226704	0.0190715
ctg1-143785582-143785710	BosERV12	+	4	73.7781	88.2358	56.7474	31.4884	1.49417e-05	0.0115594
ctg1-143786853-143787056	BosERV12	+	6	82.0727	91.772	69.5526	22.2194	0.00092863	0.0308531
ctg1-143852794-143853290	BosERV17	+	6	14.8722	5.875	26.4677	-20.5927	0.000707298	0.0271592
ctg1-144083828-144084055	BosERV12	+	4	26.3961	10.3844	46.1029	-35.7185	0.00178879	0.0402479
ctg1-144182193-144182387	BosERV12	+	4	83.5647	93.5328	71.2962	22.2367	0.000126017	0.015996
ctg1-144182276-144182401	BosERV20	+	4	83.5647	93.5328	71.2962	22.2367	0.000126017	0.015996
ctg1-144192451-144192618	BosERV11	+	4	77.1621	87.5547	64.3712	23.1835	9.90217e-05	0.0154941
ctg1-144196115-144196323	BosERV12	-	3	84.3251	90.4117	77.2372	13.1745	0.000473624	0.0237007
ctg1-144207520-144207599	BosERV12	+	3	76.5914	88.8903	62.6876	26.2027	0.000148393	0.0168702
ctg1-144207534-144207718	BosERV12	-	3	83.2729	90.1427	74.8265	15.3162	5.9973e-05	0.0136462
ctg1-144390822-144391021	BosERV12	+	4	87.1538	92.7653	80.3404	12.4249	0.000200254	0.0180833
ctg1-144470574-144470862	BosERV20	-	4	28.0772	19.0396	38.6337	-19.5941	0.00103778	0.0316416
ctg1-144598200-144598396	BosERV12	-	6	77.0319	87.5479	62.8047	24.7432	0.000320255	0.0212327
ctg1-144708612-144708687	BosERV19	+	5	74.0772	79.9769	66.8162	13.1607	0.000580014	0.025158
ctg1-144728481-144728673	BosERV12	-	4	89.1081	97.1176	79.2189	17.8987	0.00145822	0.0369542
ctg1-144758189-144758375	BosERV20	-	8	80.9426	88.6058	71.7351	16.8707	0.00252352	0.047363
ctg1-145390207-145390422	BosERV12	+	6	53.0856	61.664	43.1018	18.5622	0.00178879	0.0402479
ctg1-145390359-145390430	BosERV20	-	3	30.2401	39.2238	19.205	20.0188	0.000311152	0.0207088
ctg1-145765721-145766038	BosERV20	-	5	81.4428	86.2288	75.5408	10.6879	0.000250236	0.0190715
ctg1-145972171-145972365	BosERV12	+	5	77.4	86.9694	65.6223	21.3471	5.9973e-05	0.0136462
ctg1-146259878-146260332	BosERV6	-	6	73.8051	87.4359	57.1865	30.2494	0.000200254	0.0180833
ctg1-146278541-146278681	BosERV12	+	4	78.1928	91.1273	61.9647	29.1626	0.000200254	0.0180833
ctg1-146513724-146514113	BosERV20	-	8	89.2083	96.7458	79.9247	16.8211	0.00100411	0.0316416
ctg1-146576120-146576210	BosERV19	-	3	85.2052	92.1031	76.7154	15.3877	0.00092863	0.0308531
ctg1-146770404-146771285	BosERV11	-	10	71.9284	86.7672	54.932	31.8352	0.000858483	0.0290793
ctg1-146771891-146774069	BosERV11	-	41	78.2819	83.7581	71.4935	12.2646	0.00103778	0.0316416
ctg1-146866776-146866948	BosERV20	-	3	73.8117	84.515	62.3897	22.1253	0.00158119	0.0387014
ctg1-147003192-147003321	BosERV20	-	5	89.329	96.6511	80.0712	16.5799	0.00016609	0.0175035
ctg1-147003206-147003415	BosERV12	-	5	88.6242	96.9795	78.487	18.4925	0.00020342	0.0182992
ctg1-147123844-147124045	BosERV12	+	4	69.6974	78.4766	58.6935	19.7831	0.000296533	0.0207088
ctg1-147504572-147504697	BosERV20	+	3	88.1644	95.7042	78.8846	16.8196	0.0014366	0.0369542
ctg1-147504886-147505099	BosERV12	-	6	83.9169	91.7905	74.2301	17.5604	0.00158966	0.0387014
ctg1-148544681-148544807	BosERV12	+	5	19.2039	5.65624	34.9746	-29.3184	0.000488955	0.0239265
ctg1-148606535-148606769	BosERV12	+	5	76.2917	89.0094	60.6392	28.3701	0.00212864	0.0436811
ctg1-148606685-148606780	BosERV19	+	4	79.0677	92.0945	63.0346	29.0599	0.00015926	0.0168702
ctg1-149258087-149258381	BosERV20	+	9	28.0868	21.7319	35.9081	-14.1762	0.000200254	0.0180833
ctg1-149294208-149294341	BosERV12	-	4	60.0748	71.2892	46.916	24.3731	9.90217e-05	0.0154941
ctg1-149558321-149558525	BosERV11	-	5	65.3002	58.3725	73.8642	-15.4917	0.000858483	0.0290793
ctg1-149860217-149860411	BosERV12	-	3	85.8106	90.3568	80.348	10.0088	0.000707298	0.0271592
ctg1-149914413-149914862	BosERV6	+	5	66.0393	74.799	54.907	19.892	0.00124915	0.0343076
ctg1-150421963-150422090	BosERV20	+	3	83.1109	90.0979	74.5115	15.5864	0.000311152	0.0207088
ctg1-150510623-150510700	BosERV11	+	5	79.4812	91.6284	64.9624	26.666	7.73607e-05	0.0146299
ctg1-150510636-150510833	BosERV12	-	4	80.9845	89.9699	70.0829	19.887	0.000250236	0.0190715
ctg1-150708988-150709217	BosERV12	-	3	89.7506	95.6813	82.4513	13.23	0.000126017	0.015996
ctg1-150799522-150799661	BosERV20	+	7	19.0771	5.17679	36.1852	-31.0084	0.000317759	0.0210909
ctg1-150927438-150927657	BosERV20	-	4	85.0478	89.5728	79.4208	10.1519	0.000473624	0.0237007
ctg1-151167834-151167917	BosERV11	+	3	78.7201	93.5104	60.5167	32.9937	7.90549e-05	0.0148163
ctg1-151275636-151275698	BosERV12	+	3	20.9034	6.52813	38.5962	-32.068	0.000391908	0.0224561
ctg1-151328479-151328674	BosERV12	-	4	24.7603	14.4943	38.2707	-23.7764	0.000473624	0.0237007
ctg1-151386008-151386486	BosERV17	+	6	85.0373	95.0065	75.3606	19.6459	0.000392468	0.0224664
ctg1-151386934-151387240	BosERV16	+	10	81.9791	91.0735	70.4633	20.6102	0.000707298	0.0271592
ctg1-151569590-151569778	BosERV20	-	7	84.9953	93.8625	74.3401	19.5224	0.00015926	0.0168702
ctg1-152346488-152346592	BosERV12	-	4	91.0668	98.0856	82.6183	15.4674	6.41927e-05	0.0144393
ctg1-152386860-152386915	BosERV19	-	3	83.2046	92.3312	71.9718	20.3595	0.00124915	0.0343076
ctg1-152404538-152404621	BosERV19	-	3	61.2083	69.4	51.3588	18.0412	0.00149782	0.0369542
ctg1-152853682-152853760	BosERV20	+	5	72.0516	81.6511	60.0604	21.5907	5.9973e-05	0.0136462
ctg1-152937811-152937938	BosERV20	-	4	81.3401	88.8187	73.1393	15.6794	0.000330138	0.0217228
ctg1-152937826-152938024	BosERV12	-	4	81.9165	90.4684	72.056	18.4124	4.62101e-05	0.013545
ctg1-153229535-153229665	BosERV12	-	4	84.319	94.7281	71.5077	23.2204	0.0017112	0.0402479
ctg1-153265410-153265490	BosERV12	-	3	61.8247	67.349	55.0256	12.3233	2.67594e-05	0.011936
ctg1-153478367-153478549	BosERV12	-	3	88.1327	94.0688	81.5746	12.4942	0.00146618	0.0369542
ctg1-153745930-153746129	BosERV12	-	4	25.9362	14.1541	39.926	-25.7718	0.00103778	0.0316416
ctg1-154526419-154526572	BosERV12	-	3	91.0974	96.026	84.792	11.2341	0.00204647	0.0436811
ctg1-156252668-156252867	BosERV12	+	3	60.5816	68.65	50.6513	17.9987	0.00103778	0.0316416
ctg1-156367659-156367869	BosERV12	-	6	69.9838	81.577	55.991	25.586	0.000488955	0.0239265
ctg1-157257693-157257910	BosERV12	-	7	87.1601	93.6389	79.1785	14.4604	9.90217e-05	0.0154941
ctg1-157257680-157257777	BosERV19	-	4	83.4774	91.2373	73.7974	17.4399	0.00212864	0.0436811
ctg1-157272764-157272873	BosERV20	-	3	93.1648	98.2346	87.3043	10.9303	0.00197648	0.0434352
ctg1-157292759-157292916	BosERV19	-	8	40.4991	26.9352	57.1933	-30.2581	0.00038477	0.0220793
ctg1-157292810-157293002	BosERV12	-	9	42.0883	27.949	59.4906	-31.5416	0.000250236	0.0190715
ctg1-157478609-157478810	BosERV12	+	6	85.2083	90.6601	78.4366	12.2235	0.000250236	0.0190715
ctg1-157521878-157522288	BosERV2	+	8	47.2438	36.3815	60.3096	-23.9281	9.90217e-05	0.0154941
ctg1-158411293-158411429	BosERV20	-	4	88.8894	93.7737	82.9362	10.8375	0.00197787	0.0434352
ctg2-1652800-1653504	BosERV4	-	5	82.429	87.3375	76.3877	10.9498	0.000126017	0.015996
ctg2-1934631-1934872	BosERV20	+	3	84.5539	93.2277	74.4936	18.7341	0.000580014	0.025158
ctg2-2260444-2261735	BosERV16	+	17	71.3947	77.2861	64.3644	12.9217	2.00696e-05	0.0117801
ctg2-2712540-2712997	BosERV6	-	7	74.96	81.3722	67.2104	14.1618	0.00149782	0.0369542
ctg2-2844178-2844500	BosERV20	+	3	74.1523	81.7488	64.936	16.8128	0.000580014	0.025158
ctg2-2978525-2978733	BosERV12	+	3	73.6587	81.156	64.3913	16.7647	0.000473624	0.0237007
ctg2-3014566-3014886	BosERV12	-	3	69.8805	77.1708	60.9077	16.2631	0.00108524	0.0324592
ctg2-3592112-3593214	BosERV2	-	6	75.5252	81.2584	68.6069	12.6515	0.00149782	0.0369542
ctg2-3594319-3595600	BosERV2	-	3	79.2408	83.8175	73.4681	10.3494	0.000707298	0.0271592
ctg2-4656682-4657070	BosERV20	+	5	32.648	21.3714	46.5883	-25.2169	0.00143464	0.0369542
ctg2-5619841-5619985	BosERV19	-	4	54.3026	42.5578	68.7577	-26.1999	0.00252352	0.047363
ctg2-5937275-5937360	BosERV20	+	3	88.4824	94.8713	80.9295	13.9418	0.0017067	0.0402479
ctg2-5937293-5937477	BosERV12	-	6	86.0892	91.4945	79.5917	11.9028	0.00252352	0.047363
ctg2-7216093-7216221	BosERV12	+	3	82.7752	87.3346	77.0434	10.2912	0.00149782	0.0369542
ctg2-8192705-8192907	BosERV12	-	3	58.6821	68.9533	46.5836	22.3697	0.000274738	0.0206784
ctg2-8478533-8478736	BosERV12	-	6	82.3107	90.5768	73.1316	17.4452	0.00178879	0.0402479
ctg2-8789258-8789538	BosERV20	+	7	77.4847	87.3109	65.2073	22.1035	5.9973e-05	0.0136462
ctg2-9180259-9180313	BosERV12	-	3	22.7023	10.874	37.2603	-26.3863	0.00178879	0.0402479
ctg2-13077241-13077359	BosERV20	+	3	69.1871	77.4615	57.8245	19.637	2.00696e-05	0.0117801
ctg2-14042917-14044209	BosERV16	+	12	78.5848	85.0988	71.6305	13.4683	0.000858483	0.0290793
ctg2-14164841-14165026	BosERV12	-	4	87.4284	92.5266	81.1538	11.3727	0.000580014	0.025158
ctg2-14725719-14725945	BosERV12	+	3	77.69	85.0315	68.9476	16.0839	0.000707298	0.0271592
ctg2-15057216-15057409	BosERV12	-	3	87.0092	92.0187	80.4325	11.5863	0.000858483	0.0290793
ctg2-15062529-15062740	BosERV12	+	3	81.1397	86.6	74.4192	12.1808	0.00212864	0.0436811
ctg2-15176421-15176520	BosERV12	+	4	31.822	20.7312	45.4721	-24.7409	1.49417e-05	0.0115594
ctg2-15386540-15386739	BosERV12	+	3	87.6948	93.3573	80.7256	12.6317	9.90217e-05	0.0154941
ctg2-15450306-15450506	BosERV12	-	6	89.3722	94.9396	83.0612	11.8783	0.000488171	0.0239265
ctg2-15879010-15879192	BosERV12	+	4	82.9581	89.3593	75.8154	13.5439	0.00178879	0.0402479
ctg2-18466259-18466446	BosERV11	-	3	40.0663	26.8229	57.9731	-31.1502	0.00212864	0.0436811
ctg2-19075151-19075362	BosERV12	+	4	80.2674	88.49	70.7798	17.7102	8.35422e-05	0.0154941
ctg2-19223237-19223366	BosERV12	+	3	68.8784	79.7151	55.8551	23.8599	0.000272385	0.0205341
ctg2-19708038-19708280	BosERV20	-	6	81.7934	88.1728	73.6255	14.5473	0.00149782	0.0369542
ctg2-20198577-20198776	BosERV12	+	5	78.9031	72.7131	86.5215	-13.8084	0.00108524	0.0324592
ctg2-20235918-20236115	BosERV12	+	7	76.3101	87.0589	63.0681	23.9908	0.000473624	0.0237007
ctg2-20236054-20236133	BosERV11	-	4	69.4812	80.8914	55.5205	25.3709	0.000858483	0.0290793
ctg2-22184103-22184194	BosERV11	+	3	90.7782	95.8177	84.5756	11.2421	0.00196518	0.0434352
ctg2-22765715-22765855	BosERV20	+	3	80.9968	94.2899	65.238	29.0518	0.000200254	0.0180833
ctg2-22989186-22989375	BosERV12	+	3	73.9213	85.549	59.6103	25.9387	0.000473624	0.0237007
ctg2-23351280-23351548	BosERV20	+	6	28.1064	12.7222	46.9438	-34.2216	0.000858483	0.0290793
ctg2-23477669-23477883	BosERV12	+	3	84.072	90.2501	76.7487	13.5014	0.00015926	0.0168702
ctg2-24150409-24150890	BosERV18	+	19	78.6087	85	70.4475	14.5525	0.000311152	0.0207088
ctg2-24600375-24600643	BosERV12	-	5	81.9821	94.6787	66.036	28.6427	2.67594e-05	0.011936
ctg2-24895274-24895493	BosERV12	-	3	86.6122	93.2244	78.5846	14.6398	0.00146817	0.0369542
ctg2-25038847-25038939	BosERV11	+	4	85.5651	90.4805	79.5154	10.9651	0.00178879	0.0402479
ctg2-25591007-25591202	BosERV12	-	4	71.2159	64.9914	78.8769	-13.8855	0.00149782	0.0369542
ctg2-25994364-25994566	BosERV12	+	5	79.6266	87.7407	69.8767	17.864	0.000580014	0.025158
ctg2-25994469-25994578	BosERV19	+	3	83.4327	89.9234	75.5867	14.3367	0.000229514	0.0190715
ctg2-26773653-26773765	BosERV19	-	3	63.3299	73.3708	50.9718	22.399	0.000311152	0.0207088
ctg2-27337556-27337807	BosERV6	-	4	88.5681	96.0125	79.4058	16.6067	0.000350372	0.0220793
ctg2-27765051-27765259	BosERV12	+	5	90.6478	95.9505	84.0028	11.9477	0.00244891	0.047363
ctg2-27896832-27897038	BosERV12	-	8	88.2046	95.8705	78.9295	16.941	0.000707298	0.0271592
ctg2-27898875-27899103	BosERV12	-	4	83.6409	90.9117	74.6923	16.2194	3.52765e-05	0.0127862
ctg2-27904463-27904671	BosERV12	+	3	88.061	97.1045	76.5292	20.5753	0.000123051	0.015996
[truncated: 7,516 more rows]
