# Supplementary material
Source: Research Square preprint supplement (doi:10.21203/rs.3.rs-9590742/v1)
Supplement: Supplementary file 3 [file 7636139ab85f4b46eb48028d.xlsx]

## Sheet: Sheet1
Table S3 Summary of retrotranspson consensus sequences identified in the bovine reference genome
Retrotansposon class	Retrotansposon family	FRG number	Masked length / million bp	% genome	Consensus sequences length/ bp	%GC in consensus sequence	consensus sequence
LINE	BosL1A1	7695	5.13	0.0019	8533	0.388	GGGGGGAGGAGCCAAGATGGCGGAGGAGTAGGACGGGGAGAACACTTTCTCCCCCACAAATTCATCAAAAGAGCATTTAAACGTCGAGTAAATTCCACAAAACAACTTCTGAATGCCGGCAGAGGACATCAGGCACCCAGAAAAGCAACCCAACTCTTCGAAAGGAGGTAGGAAAAAATATTAAAAACAAAAAAAAAGAGACAAAAGAGGGAGGGACGGAGTTCCGTCCCGGGAAGGGAATCTTAAAAAGAGAGAAGTTTCCAAACATCAGGAAACCTTCTCACTGCCGAATCTGTGCCGAGCTTTGGAAGCACAGAGGGCAACATAACAGGGAGAAAAAATAAATAAACAATTTAAAACTCGCAGATTGCGAGCCCTACGGTAACTCCCCCAGCAGAG…
	BosL1A2	17049	14.85	0.0055	8354	0.396	GGGGGGAGGAGCCAAGATGGCGGAGGAGTAGGACGGGGAGAACACTTTCTCCCCCACAAATTCATCAAAAGAGCATTTAAACGCCGAGTAAATTCCACAAAACAACTTCTGAATGCCGGCAGAGGACATCAGGCACCCAGAAAAGCAACCCAACTCTTCGAAAGGAGGTAGGAAAAAATATAAAAGACAAAAAAAGAGACAAAAGAGGGAGGGACGGAGTTCCGTCCCGGGAAGGGAGTCTTAAAAAGAGAGAAGTTTCCAAACACCAGGAAACCTTCTCACTGCCGAATCTGTGCCGAGCTTTGGAAGCACAGAGGGCAACATAACAGGGAGAAAAAATAAATAAACAATTAAAACCCGCAGATTGCGAGCCCTACGGTAACTCCCCCAGCGGAGAAG…
	BosL1A3	29839	18.95	0.007	7871	0.41	GGGGCGGTCCTAAGATGGCGGAGGAATAGGACGGGGAGACCACTTTCTCCCCCACAAATTCATCAAAAGAACATTTAAACGCTGAGTAAATTCCACAAAACAACTTCTGAATGCCGGCAGAGGACATCAGGCACCCAGAAAAGCAGCCCATTGTCTTCGAAAGGAGGTAGGAAAAAATATAAAAGACAAAAAAAGAGACAAAAGAGGTAGGGACGGAGCTCCGTCCCGGGAAGGGAGTCTTAAAAAGAGAGAAGTTTCCAAACACCAGGAAACACTCTCACTGCCGAGTCTGTGGCGAGCCTTGGAAGCACAGAGGGCAACATAACAGGGAGGAAAAATAAATAAATAATTAAAACCCACAGATTACGAGCCCAACGGTAACTCCCCCAGCGGAGAAGC…
	BosL1A4	11011	4.87	0.0018	7827	0.391	GGGGGAGGAGCTAAGATGGCGGAGGAGTAGGACGGGGAGAACACTTTCTCCCCCACAAATTCATCAAAAGAACATTTAAACGCCGAGTAAATTCCACAAAACAACTTCTGAANGCCGGCAGAGGACATCAGGCACCCAGAAAAGCAACCCAAGTCTTCGAAAGGAGGTAGGGAAAAATATAAAAGACAAAAAAAGGGACAAAAGAGGGAGGGACGGAGTTCCGTCCCGGGAAGGGAGTCTTAAAAAGAGAGAAGTTTCCAAACACCAGGAAACCTTCTCACTGCCGAATCTGTGCCGAGCCTTGGAAGCACAGAGGGCAACATAACAGGGAGGAAAAATAAATAATTAAAACCCGCACATTGCGAGCCCTACGGTAACTCCCCCAGCGGAGAAGCAGCG…
	BosL1A5	10236	4.96	0.0018	6469	0.399	GGGGGAGGAGCCAAGATGGCGGAGGAGTAGGACGGGGAGAACACTTTCTCCCCCACAAATTCATCAAAAGAGCATTTAAACGTCGAGTAAATTCCACAAAACAACTTCTGAATGCCGGCAGAGGACATCAGGCACCCAGAAAAGCAATCCAACTCTTCGAAAGGAGGTAGGAAAAAATATAAAAGACAAAAAAAGAGACAAAAGAGGGAGGGACGGAGTTCCGTCCCGGGAAGGGAGTCTTAAAAAGAGAGAAGTTTCCAAACACCAGGAAACCTTCTCACTGCCGAATCTGTGCCGAGCTTTGGAAGCACAGAGGGCAACATAACAGGAAGAAAAAATAAATAAACAATTAAAACTCGAAGATTGCGAGTCCTACGGTAACTCCCCCAGCGGAGAAGC…
	BosL1A6	50665	25.64	0.0095	5834	0.384	GGGGGGCGGTCCTAAGATGGCGGAGGAATAGGACGGGGAGACCACTTTCTCCCCCACAAATTCATCAAAAGAACATTTAAACGCCGAGTAAATTCCACAAAACAACTTCTGAATGCCGGCAGAGGACATCAGGCACCCAGAAAAGCAGCCCATTGTCTTCGAAAGGAGATGTTTTATCAACGGTGCTGTATAGAAGGAGAAGTCTTGAGGCTACTGTAAAAATAAGACCGAAAACCGGAAGCAGGAGGCTTAAGTCCAAATCCTGAGAACACCAGAGAACTCCTGACTCCAGGGAACATTAATCGACAGGAGCTCATCAAACGCCTCCATACCTACACTGAAACCAAGCACCACCCAAGGGCCAACAAGTTCCAGAGCAAGACATACCACGCAAATTCT…
	BosL1A7	6507	1.59	0.0006	5675	0.375	GGGGAGGAGCCAAGATGGCGGAGGAGTAGGACGGGGAGAACACTTTCTCCCCCACAAATTCATCAAAAGAGCATTTAAACGTCGAGTAAATTCCACAAAACAACTTCTGAATGCCGGCAGAGGACATCAGGCACCCAGAAAAGCAACCCAACTCTTCGAAAGGAGGAGCTCATCAAATGCCTCCATACCGACACTGAAACCAAGCACCACACAAGGGCCAATAAGTTCCAGGGCAAGACATACCAAGCAAATTCTCCAGCAACAAAGGAACACAGCCCTGAGCTTCAAGATACAGGCTGCCCAAAGTCACCCCAAAACTATAGACATCTCATAACTCATTACTGGACATTTCATTGCACTCCAGAGAGAAGAAATACAGCTCCACCCACCAGAACACCG…
	BosL1A8	17775	10.33	0.0038	5476	0.375	GGGGGAGGAGCCAAGATGGCGGAGGAGTAGGACGGGGAGAACACTTTCTCCCCCACAAATTCATCAAAAGAGCATTTAAACGTCGAGTAAATTCCACAAAACAACTTCTGAATGCCGGCAGAGGACATCAGGCACCCAGAAAAGCAACCCAACTCTTCGAAAGGAGAGAGAAGAAATACAGCTCCACCCACCAGAACACCGACACAAGCTTCCCTAACCAGGAAACCTTGACAAGCCACCTGTACAAACCCACACACAGCGAGGAAACGCCACAATAAAGAGAACTCCACAAACTGCCAGAATACAGAAAGGACACCCCAAACTCAGCAATTTAAACAAGATGAAGAGACAGAGGAATACCCAGCAGATAAAGGAACAGGATAAATGCCCACCAAACCA…
	BosL1B	181329	72.47	0.0268	8458	0.392	GGGAGAGAGAACAAGATGGCGGAGGAGTAGGTGGACGTGGAGTACATCTCTCTCCACGGATACATCAGGAATACACCTTCAGACACAGAAGTGCATGCAGAACACCAGCTGAGAGCGGACAGGAGTACCTGACCAGTGGAAAAGAATATATAGAACCACGCAAAACTCGGTAGGACGAAGGAACTAGGGGGAAAAACAGGAGTGTTAGTAGGACTGGACCTGCCCTCGGCGGGTGGGGGAACTGAAGCAGGGGTCCGATCCCCACATCGGGGCAACTGTCTGAGTCAGAGGAGAAACATTTAAGGCTGAGAGTGAAACAGCTGATCTGTGGCAGCCTAAATGGAATGAGAATCAGACAGTCCTTGCCGCAGCCATACATACCCCGGACAGGGACGCNGG…
	BosBovB	427610	337.33	0.1243	3856	0.484	AAGCGCAGGCGGCTGCGACGGGCGCGCTAAGCGCGGCCGAGAGGAGCTACCCCACGTCCGAGGTCAGGGGCAGAAGCCGGGAGGACCCCATGCCCGAAGGGCGGCGGCCGAGAGGAGCTACCCCACGTCCGAGGTCAGGGGCAGCGGCCGAGAGGAGTACCCCACTGCGACGGCGCAGGAGCGGCCGAGAGGAGCTACCCCGCGTCCGAGGTCAGGGGCGGCGGCCGAGAGGAGCTACCCCGCGTCCGAGGTCAGGGGCGGCGGCGAGAGGAGCTACCCCGCGTCCGAGGTCAGGGGCGGCGGCCGAGAGGAGCTACCCCACGCCCCAAGCCCGAGGCCAGGGGCGGCGGCCGGGAGGAGCTACCCCACGCCCGAGGCCAGGGGCGGCGGCCGGGAGGA…
SINE	SINEL	207356	47.6	0.0177	276	0.576	CGGAGAAGGCAATGGCACCCCACTCCAGTACTCTTGCCTGGAAAATCCCATGGACGGAGGAGCCTGGTAGGCTGCAGTCCATGGGGTCGCTAAGAGTCGGACACGACTGAGCGACTTCACTTTCACTTTTCACTTTCATGCATTGGAGAAGGAAATGGCAACCCACTCCAGTGTTCTTGCCTGGAGAATCCCAGGGACGGGGGAGCCTGGTGGGCTGCCGTCTATGGGGTCGCACAGAGTCGGACACGACTGAAGCGACTTAGCAGCAGCAGCAGC
	SINE1	99442	17.8	0.0064	328	0.543	GGGCTTCCCTGATAGCTCAGTTGGTAAAGAATCCGCCTGCAATGCAGGAGACCCCGGTTCGATTCCTGGGTCGGGAAGATCCCTGGAGAAGGGATAGGCTACCCACTCCAGTATTCTTGGGCTTCCCTTGTGGCTCAGCTGGTAAAGAATCCGCCTGCAATGCGGGAGACCTGGGTTCGATCCCTGGGTTGGGAAGATCCCCTGGAGAAGGGAAAGGCTACCCACTCCAGTATTCTGGCCTGGAGAATTCCATGGACTGTATAGTCCATGGGGTCGCAAAGAGTCGGACACGACTGAGCGACTTTCACTTTCACTTTCACTTTCACTT
	SINE2	223104	40.7	0.0149	230	0.613	GGGCTTCCCAGGTGGCGCTAGTGGTAAAGAACCCGCCTGCCAATGCAGGAGACGTAAGAGACGCGGGTTCGATCCCTGGGTCGGGAAGATCCCCTGGAGGAGGGCATGGCAACCCACTCCAGTATTCTTGCCTGGAGAATCCCATGGACAGAGGAGCCTGGCGGGCTACAGTCCATGGGGTCGCAAAGAGTCGGACACGACTGAAGCGACTTAGCACGCACGCACGCACG
	SINE3	210321	31.5	0.0116	216	0.574	GGGCTTCCCCGGTGGCTCAGTGGTAAAGAATCCGCCTGCCAATGCAGGAGACGCGGGTTCGATCCCTGGGTCGGGAAGATCCCCTGGAGAAGGAAATGGCAACCCACTCCAGTATTCTTGCCTGGGAAATCCCATGGACAGAGGAGCCTGGCGGGCTACAGTCCATGGGGTCGCAAAGAAGTCGGACACGACTGAGCGACTAAACAACAACAACAA
	SINE4	23706	3.3	0.0011	173	0.48	GGGACTTCCCTGGCGGTCCAGTGGTTAAGACTTCGCCTTCCAATGCAGGGGGTGCGGTTCGATCCCTGGTCGGGGAGCTAAGATCCCACATGCCTCGCGGCCAAAAAACCAAAACATAAAACAGAAGCAATATTGTAACAAATTCAATAAAGACTTTAAAAATGGTCCACATCAAAAAAAAAA
	SINE5	35857	3.6	0.0125	135	0.563	GGGACTTCCCTGGTGGTCCAGTGGCTAAGACTCCGCGCTCCCAATGCAGGGGGCCCGGGTTCGATCCCTGGTCAGGGAACTAGATCCCACATGCCGCAACTAAGACCCGGCGCAGCCAAATAAATAAATAAAATTAAAAAAAAAAAAAAA
	SINE6	80639	8.9	0.0332	109	0.67	GGGACTTCCCTGGTGGTCCAGTGGTTAAGACTCCGCGCTTCCAATGCAGGGGGCGCGGGTTCGATCCCTGGTCGGGGAACTAAGATCCCACATGCCGCGCGGCGCGGCCAAAAAAAAAAAAAAAAAAAA
		FRG number		% genome	Consensus sequences length/ bp	%GC in consensus sequence		Genera
ERV	BosERV1	2369		0.0006	9181	0.444	TGAGAGGGTAACAGGCAGGAAGGCCAGGGGTCTCCAAATGGAGGAAATAGCCTGCAAGTGTCAGACATTTTTATCTCTCTTAAGCGGCAGGAGGAAACAAACTAGCAATATTTTTTCCTTCTCTATACAAATTTAAAGGGAGGTTTCTCTTAAAATACTGTGTTGCCATAATGACACCCGGTTTCGCCTGAAGTTAGCTATTCTCGAGTCTAGAGATAACCAATGCCTTTTTCTTATGGAAATGTTTGTCTTAAGCTATGCTAATGTACTATGCCTTTACCCCAAACTCTGTCTCCAAGTCGGTTCCGCCTCTTGGCCCAGAACCTACTTGACAAACCAGTATGGATATTGTTCCCCTAATCTATGTAAATGAAACTATTTGTATGGTGGTCTGCCCTT…	Gamma
	BosERV2	4373		0.0008	6353	0.457	TGAGAGAGTCATTTCCTAGGCAGGTTGATAGGGAGTCTAGGGGTCCCCAAGGAGAGAGGGGTCTGGAATTCTCAAGGAGGAAGAAAGGACAAACTTTTTTTCTTTCTCCACATTCCTTAGGATTATATAACAATAATGTATCCTGCCTAAGGACAGTCTTTGGATTCAACCTTCTGTTATCTTAAAATGTTAATTATGGGAGTAGACCTGGTCTTTACAAGGATGTATCTTGCCTGAGGACAGTGTTATCTTAAAATGTAAATTATGGGAGTAGGTCTGATGAGGTCTTTACAACCTCCAGACATTCTTTGGATTATATAACCTCATTGTTAACACTAGCAAGCGGGTACTCTTTCTGCCCCCTTCTGATGCCTATGTCAGAAGCTTTCTCTATCTCCT…	Gamma
	BosERV3	1871		0.0005	10596	0.437	TGCGGGGAGCCGGTGAGGCATTCCACTCGTGACAAAGGTCATGAGGAAGGAGGCTCGGCATACGCAAAGGCGGGATCGAGCCTCAGGAGTCCCCCCGGATATTCTCGAGCATTTTCCCCCAAAAAACCAGAGTCTGCCTACTTTATTGCTTTGTGCTCTCACCTCTGACTTTACTGGGGGCTGTCCCCTACCACCATCTCTCTCTCTGTGTGTCAAAGAGTTAACTTACAGCTCCAATTAATAAAGTTCCTGGGCAATTAGGAGTGTTTAAATCCAAACCCCTCTGATGGCTCTCTAACTCGCCTGACAAGTTTACCCGGACTCCTGCAGCTATGCATACGATTGTTTACAGTCTCCTAGCCTCGAGAGGCATGGGAAGCTTAAGATATTCAAATAGCT…	Gamma
	BosERV4	1634		0.0004	7644	0.414	TGTTGGGAAGCGCAGTACAAAATAGCCGTGTNGGAGGAAGTCCTTGGGAAAATGGCGAAGGGCCAGAAGTACCCCGGCTTTGCGTGCTGCGGGCAGAAAAACATCTCCTGCCTTTGGTTATGCCCGGCGCCAAGATTTAATAATAAATATTAAGGATGTTGCTTGAGAAAACGGGTTATGGGATAAGCACATGGGTCACTTAGAGCGCGCTGTCCTTGAAATATCTTTTACTGATTATGTGTTAACCCCGTACGCGCTCTGCTGGCCGTATACTCTAAGCTCTTTGTTCCTGCTTCTATAAAAAGGCTTGACTGCAGAAATAAACTTGTCAGTCCTTGCAAGAGACTGTCCGAGTGTCGTTCTTTCAGGTTCGTCGCTTCCAAGTCCCGGGGAGAAAAT…	Gamma
	BosERV5	971		0.0002	7006	0.412	TGTTGGGAAGCGTAGTGCAAAATAGCCGTAAAAGGAGAAAGTCCTTGGGAAAATGGCGAAGGGCCAGAAGTACCCGGCTTTGTACTGCGGACAGAAAAACATCTCCTGCCTTTGGTTATGCTCGGCGCCAAGATTTAATAATAAATAGGGATGTTACTTGNGAAAGCGGGTCGTGGGATAAGCACATGAGTCATTTAGAGCGCGCTGTCCTTGAAATGTTTTTACTGATTATGTGTTAACCCCGTACGCGCTCTGCTGGCCGTATACTCTAAGCTCTTTGTTCCTGCTTCTATAAAAAGGCTTGACTGCAGAAATAAACTTGTCAGTCCTTGCAAGAGACTGTCCGAGTGTCGTTCTTTCAGGTTCGTCGCTTCCAAGTCCCGGGGAGAAAATCCCCAA…	Gamma
	BosERV6	2184		0.0004	7911	0.408	TGTCAGGGGACGTTCAACTTTAAGGGATCCAATATGTTATTTTCTTCTTTTGTGTGCCGTTTCTCAAGGACTCTCTATTCCTTATCAGTTCCTGGAAAACAGGAACGAGCAGAGCTGCACGCAGTTCTCAGGACTGAGATCATGAGAAAGGGCACCTGCTTGGATTCCCTTCAGTGACTCCCTTCAGTGACCTTTTACTTAAAGGTAATCTATTCAGTTATGCCCCTCTTACTCAGGATATGGAATGCTTTCTGGCCCTTTGAAGATTGTTATTTGCTTGGCTTTGTTTTTGCTCAATTTTTTTACTGCCTAAAGCTGCCTTGTATGAAGATATATAAACATGCGTTTCTGCAAATAAAGCACCCTTGTTTCACTCGAGACTTGGGTCCCCTGCGTCCT…	Gamma
	BosERV7	223		8e-05	8338	0.439	TGTCGGGAGCCGCGTTAGGCATTACTGACAAAATGGAGGCACGGCCCCCAGCCCCCTCTCCTCATTCCGCAGGCACGGATCCCGGGATGAAGGAGTTAGGCCTTGTAATTCTGACTTGTCTTTTCCTCTCCTCGGCTGAGTTGACTGAAAAGGAATATTAAGGTGCTTATTGTTCTTGAGAGGAGCATGAGAAGGCACAAAGCCTTCTGCAGCTGTGCTCAGAAAATAATTCATAAAGTTAATCATTGACATTTGTTCAAGGACTTTTACAAAAGAGTGTTCCAGGATGAGCACATAGGCCATAGCTTGAGGCCATGGGAGGGATTGATATCTGAAGCCTATTTGTGAGGAGAATGTTTATGGCAAAGGAGTTTACTGAATTTAGGGCTTAGAAATAAT…	Gamma
	BosERV8	302		0.0001	7354	0.536	TGAGATAGGAGCGAGATCAAAGCCCCCAATTAAAGTAACAACCTTTTGCTTTCCCTTCCTTTATCTTGTGTTTAAACAGCTGCTGCTCATCAATCACCGCTTTCGCTTCTGTGATCTTGCTTGCTCGTTACATCCACGGGAACTAGGGCTACCTGGGGAGGGGAGGGATCTGAGCTGTTTGAGTGGGAAGTTTACGGTGTATAAAAGATACCCAGAACAAAGCCGGGGCGCTCAGCCTCTGGAGGCGACTCCGCTGAGCCCGCACCGGTGCTGAATAAACCCTGCTGTTCTGCATCTTCGAGTGCCGCTTGTCTCTTTCCGACGCCACGGTTTCTATAACATTTTCTGGTGCATTGGCCGGGAAGCCGACAACCGAGCTGGCCCCTTGCGCCACCATTG…	Gamma
	BosERV9	1162		0.0002	8566	0.517	TGAAGGAGTCTTTTGGGCCTAGAAAAGAAAACAACAGTCTCAAAGGCCCTTGCTGAATCATCTAACTTCAGAGAAAACAAAACAGAACTTTAGGTCCCGCCCTGATGCTCCAGGCCGGTTGCATCTATCTGGGACTTATCACCCCCTGTCCAGAAACCTTCCACCCCCTACACCTGCCCAGAAGACTTATCACCCCCTGCCCAACTACAAATGCCATCTCAACTAAAGAATACCCAAAACATCCCGCCTGATTAACGTTTCCCTTATCGCTTCCACAAACCTCCCTATAAATATGGAGCCTCCCTGATCCCTCTCGCGCTCAGCCTGGTCNTTAGGCCGACTGTCGCCCCTCCTTGCCTGAATAAAGGTAACCTACTTCTGTTGAGGTCGTCTTTCCTC…	Gamma
	BosERV10	279		8e-05	7944	0.498	TGTTAGGTAGGTAGAATAGGGAAAAGGAGTCCAAAATGGCGGTGGCTAAAAGACAAGGAAGGTCAAAGGAAGGTCCGAGGACCAGAGTGAAGACTTCAGGCAGAACAAACAGCACTCCTGGCTAAGCCCAATTTGCATAGGGCAGGCCCAGGTGGAGGAAAAAACATATAAAAGGAGGAGCCAAAGCGCTTTCTCTCGGACTCTCTCCCGCGCGCGCGCGCTCCTCTCTCTCTCTCTCTCTCTCTCTCTCNACTCNCCCNCTCTCTTCTCTNNGTCTTGGATTCTCCTGCTATCTTCTAAATAAAATAGAGCTGTAACACTGATTTGCCTAAGAGCTGTAACACGGTTTGTCCAAGACCCGAGAGCTGTGACGCGCCGAGGGCTTTAATGTCCGTCGCT…	Gamma
	BosERV11	46300		0.0016	7055	0.498	TGTTAGGTAGGTAGAATAGGGAAAAGGAGTCCAAAATGGCGGTGGCTAAAAGACAAGGAAGGCAAAGGAAGGTCCGAGGACCAGAGTGAAGACTTCAGGCAGAACAAACAGCACTCCTGGCTAAGCCCAATTTGCATAGGGCAGGCCCAGGTGGAGGAAAAAACATATAAAAGGAGGAGCCAAAGCGCTTTCTCTCGGACTCTCTCTCCCGCGTGCGTGCGCTCTTCTTTCTCTCTCTCCNTCTCTTTGATTCTCCTGCTATCTTCTAAATAAAATAGAGCTGTAACACTGATTTGCCTAAGAGCTGTAACACGGTTTGTCCAAGACCCGAGAGCTGTGACGCGCCGAGGGCTTTAATGTCCGTCGCTCCAAATCTTTGTTGTGACGAGACAAAGAACC…	Gamma
	BosERV12	297975		0.0163	7407	0.508	TGTTAGGTAGGTAGAATAGGGAAAAGGAGTCCAAAATGGCGGTGGCTAAAAGACAAGGAAGGTCCGAGGACCGGAGTGAAGACTTCAGGCAGAACAAACAGCACTCCTGGCTAAGCCCAATTTGCATAGGGCAGGCCCAGGTGGAGGAAAAAACATATAAAAGGAGGAGCCAAAGCGCTCTCTCTCGCTCTCTCTCCCCCGCGCGCGCGCGCTCTCCTCCNCTCTCTCTCTCTCTCTCTTGGATTCTCCTGCTATCTTCTAAATAAAATGGAGCTGTAACACTGATTTGCCTAAGAGCTGTAGCACGGTTTGTCCAAGACCCGAGAGCTGTGACGCGCCGAGGGCTTTAATGTCCGTCGCTCCAAATCTTTGTTGTGACGAGACAAAGAACCGAGGAAC…	Gamma
	BosERV13	73		5e-05	6323	0.506	TGAAGAAGGAATTCGNAGGGCCTGGACTCCATCTTAGGCCTGTTCATGCTGATCATGCTCGGCCACCTTTCCAATGGACTCTGAACTCTGTGCTTAGTGCCTATGGAAACGACAACAGAAGGATAAGACCCCCTCCGGACAGGGGAACCTCGAAGATCGTATCTAGGTTACTCGTCGCCTAAGAGAAAACATACGCTAATCACCCCTTCCTCCGGACAGGCCATAAATTTTTCTGTATCTATCGGAGTGTAACCTCGGGCTTATTGATTATTGGCTAATTGTTTGACTGTTTGAGCACATGAGCACATAGCACGTGAATGATGGGGTTATTGNGATTGTATTTTCCTTTGGTTTATGTAAGTCTCAAGGAATTTGGGGTGGTGGGTTCGGACACGTACA…	Beta
	BosERV14	141		9e-05	9063	0.525	TGAAGAGGAAAAGTTAAAATTTTACATAACCTCCTGCTCCTTCTGCCTCTGTAACTCAGCTTGCTCCTTGCAAAGTCTGGATCACGTAGGTCACGTAGTCTCAGAAAGTGGGGACTCACAATACTAGGAACTGGAGCTTATCTCACTCACCCTTGTCCTGCTCTTTGCAATCGCCCNAGCCCCTGCAAACCCACTTAATCATGCCTGTCCGTGTATAAAAACTCTGTAACCCCTTTGTTCGGGGCTCAGAGCTTGGAGTGTTAACTCCTCTGGGCCCGCCAGCGTAATAAACCTGAGTTCTCCAACTCTCCGAGTGTGGTGCTTGGTTTCTCGAGTACTGGTTTCTGCAACATTTCTGGAGGCCCCAGCGAGATTCCAACCACGCCGGCCCCTTGAGCC…	Beta
	BosERV15	956		0.0003	8113	0.434	TGCGGGGAGCTGCCCGTGAGAACGGGGTCCTTTGTCCGAAGGACACAGCTCTGGGAGCTGCCTCAGTCCTTGAGGGTTTGCTTGCAAACATAGCTCTCTGTCCCGCCACCCCAGAGATTAGGCGCTTATTTACTGCAGGCACCTGGAGTTCTGTGCAAACTTCTCACGCACAGAGAAATGTTATCTGGTGTAAGAAATAATAACAGGGNGCCATTCCCATGCTCTCAAGATTTCTTGTGACTGTTTGTAAGATGTATAGGCCAACCAAGAAAAAATGTCAACTGTCTTGTCTTTCTCACGCTCTTCTGTATAAATATGAGATGCTGAATAAAGTTGGTGTCAGACTGCGTCCCTTCGTGGAGACGTGTCTGAACCTCTCGACCCCATCTTTGTTGTAGT…	Beta
	BosERV16	9030		0.0013	8225	0.483	TGAAGGAAAGTTACACGGCTCAAAATAGCCTGGAGTTAAAACTCCCCTCCAGGTCCTCCCCACCATTCTATGCAAAACAAAGAACTCTCTCACCCAAAGGGAAAAAAATGGACATTAAGGTTGATTACGCCCAGCTCCCAGCCGGTCCCAGCCTCTGGCCGATCTCCAGAATTCCTTGCCCCAGCCGTTTAAGAGATAACTACTCCAAACAACCTTGGAGAAGAACAGGCCCCCTTAAGACAGTAGATTTCCACATATATGCCTATATATACTTACTCTTTTCTTGGGTTAGTGCAGCAGCTCACTAATCTGACTGCTGCCCCTTCTCGCCTCATTAAAGGTGATCTGTTCCTGTAAAGTGCCGGTCTCGTTCTTTTTCCGAACCTCGCCTTCTCTAAC…	Beta
	BosERV17	1271		0.0002	9160	0.504	TGGGGAATGAAGAAGGAATTCACAGGGCCTGGACCCCATCTCAGGCCTGTTCGTGCTGATCGTGCCCGGCCACCTCTCCAGTGGACTCTGGACTCTGTGCTTAGTGCCTATGGAAACTACAACAGAAGGATAACATCCCCTCTGGACAGGGGAATCTTGAAGATCACATCCAGGTTACTCATCGCCTAAGAGAAAACATACTCTAATCACCCCCGCCTCCGGACAGGTCATAAATCTTTTCTGTATCTATCGGAATGTAACCACAGGCTTATCGATTATTAACTGCTTGGAATGTAACCGCGAGCTTATTGATTATTAACTGTCTGAACACATAAGACATGAATGATGGGGTTATTGTGATTGTATTTACCCTTCCTTTGTTTATGTAAGTCTCAAGGA…	Beta
	BosERV18	270		9e-05	9620	0.426	TGTAGTGGGAATTCCTAATAATGTACTTTCACAGCCTTGAGAAATTCCACAGAAACAGCACCTGGAAAACAGCATATATTAAGAAACTGTGTTAATGATTATCTTTCATGTTTTTCTTAAGAATAATCGCCTTGTTACAAACCCCAAGGCCAGACCCAGAAGGGAGTATGACTGGGATCACGAAAGCACGGACCTTGGGACGCTGGGTCGGCGTCAGGCATGAATGCTGCCTANNCACTTGCCGATTGTTCCCAANACTAGCCCAGAAGGGAACGGCCTGGAGTAAAAACAAGGAGATCTGGACTATGTCAGTGTAGTCCATGACATTTAGNAGTACGNNATTAANACAGCGTTGTCTTGAGAAAGATAAGATCAAAGAAAGTCTTGTAGTCTGCAATT…	Beta
	BosERV19	89462		0.0008	8629	0.402	TGTAGGGAATATGCTATGCACAGGCCTGTACTATAATTAACGGGGCTTCTTTGAAAAATAAGAATGACTTTCTCATCACCCCCAGGCGAAGGGCTGGGAGCAGTAAAAAGTACATCGTGGAAAGACATCTTGAAAACAAGATGTTGAAGTACTGATGTGACTGATGGAAAACATTAGTGACTGTTCCTGTAACCAGAGCCTTGAGGGAGTTGCTGAGAAAGGGCGTCGCTAGCCGAAAGGCTAAACAAAGTCATGAAAGGCCTGAAGGTTTGACATTGAGGACTGTGCATTGTATATCTTTATCCCCGATCCGAGATTGTAAAGAACAGATATCTCTAGAGCAGGAATAAGGAAGTAGAAGTTAACAATAAAAGGCACGCGAGGATTAGGATCTGGGCT…	Beta
	BosERV20	186682		0.0103	8446	0.486	TGATAGGGCCCACATGGGGGCTCATTGTTAAGATGGCTCATTATGTTGACCTCGCAAACAAAGAATAAAATCACAGTGACCCTTGAGACTGACCAAATTGCCCAAACGACATTCTGTTTTCTCGCTGGCGCCTACCTTCTCAAAGCTACGAGACCACCAGATTCCAGACCTCCGGCTACGTGACCACAGGACTCAACTACAGGCTAAAAATTAACCATCCCTTCAGAGAATTTTTCATTGGTGGGGTATAAGAAAGACCCCGTCAGAAAGGGAGGACGCTGGTTCTCCTTAAGGGCCAGTCACCCTCTCNTTTCCCTCTAATAAATTTCCCTTTTCTTGCCTGACTGCCCGGCTCGCTCTCTTTTTCTCTGCACTCGCCTTACATTCTGGTGCCGAAAC…	Beta
