# Supplementary material
Source: Research Square preprint supplement (doi:10.21203/rs.3.rs-9590742/v1)
Supplement: Supplementary file 4 [file e580da280d3521cca8f0fa72.xlsx]

## Sheet: S5A_DM_SINE_overlap_DEgene
Table S5A Differentially methylated SINE retrotransposons overlap with differentially expressed genes related to Subclinical mastitis
ID (a unique identifier based on SINE genomic coordinates, combining chromosome, start, and end positions)	mean DNA methylation level in all samples	mean DNA methylation level in samples with S.aureus subclinical masistiis	mean DNA methylation level in controls samples	DNA methylation change	p_value	p_adj	gene	baseMean	log2FoldChange	padj	If overlap with gene	If overlap with exon	If overlap with intron	If overlap with promoter	family	strand	n_cpg
ctg1-113389071-113389242	83.0013	92.6435	71.0761	21.5675	0.000311152	0.0180281	ARHGEF26	111.628	-3.62293	1.15e-05	TRUE	FALSE	TRUE	FALSE	BosSINE3	+	3
ctg1-116747892-116748003	87.1583	95.8869	75.9236	19.9632	2.85866e-06	0.00818994	MED12L	147.836	1.03782	0.0128677	TRUE	FALSE	TRUE	FALSE	BosSINEL	-	5
ctg1-116979160-116979434	69.2666	61.3788	77.9631	-16.5843	0.000858483	0.026256	MED12L	147.836	1.03782	0.0128677	TRUE	FALSE	TRUE	FALSE	BosSINEL	+	7
ctg1-118296720-118296919	85.7842	91.7043	78.8062	12.8981	0.00149782	0.0334817	RNF13	1634.08	1.36593	0.000813028	TRUE	FALSE	TRUE	FALSE	BosSINE1	-	5
ctg1-118499143-118499332	76.2523	87.3875	62.3056	25.0819	7.73607e-05	0.0124599	WWTR1	324.786	-1.58977	0.00176445	TRUE	FALSE	TRUE	FALSE	BosSINE2	-	3
ctg1-118559485-118559759	75.0269	86.4914	60.9826	25.5087	0.00212864	0.0396247	WWTR1	324.786	-1.58977	0.00176445	TRUE	FALSE	TRUE	FALSE	BosSINEL	+	9
ctg1-118572542-118572749	75.431	87.8106	60.1946	27.616	0.00149782	0.0334817	WWTR1	324.786	-1.58977	0.00176445	TRUE	FALSE	TRUE	FALSE	BosSINE3	+	5
ctg1-118625467-118625740	59.2465	73.0355	43.635	29.4005	8.01604e-06	0.00881238	WWTR1	324.786	-1.58977	0.00176445	TRUE	FALSE	TRUE	FALSE	BosSINEL	-	9
ctg1-118860968-118861039	7.72529	1.99635	14.5522	-12.5559	0.00320632	0.0494937	TM4SF18	55.6244	-2.38861	0.00115788	TRUE	FALSE	TRUE	FALSE	BosSINE2	-	4
ctg1-118867504-118867716	80.0881	88.4131	70.1732	18.2399	0.000200254	0.0158399	TM4SF18	55.6244	-2.38861	0.00115788	TRUE	FALSE	TRUE	FALSE	BosSINE2	-	3
ctg1-127447179-127447373	57.0623	49.6887	66.1778	-16.4891	0.00298141	0.0468558	RASA2	1537.59	1.06642	0.00671768	TRUE	FALSE	TRUE	FALSE	BosSINE3	-	3
ctg1-141726813-141727019	78.637	88.2246	66.8899	21.3348	0.00149782	0.0334817	TMPRSS2	107.982	-3.27526	0.000252153	TRUE	FALSE	TRUE	FALSE	BosSINE3	+	5
ctg1-142035827-142035993	79.184	91.835	63.4509	28.3841	0.00265228	0.0446645	RIPK4	56.7153	-2.51854	0.00159843	TRUE	FALSE	TRUE	FALSE	BosSINE2	+	3
ctg1-142525387-142525577	76.389	70.8674	83.5382	-12.6709	0.00124915	0.0309714	ABCG1	363.168	1.92361	0.00140137	TRUE	FALSE	TRUE	FALSE	BosSINE1	+	3
ctg1-142534773-142535000	89.1778	94.2686	83.1263	11.1423	2.67594e-05	0.0103792	ABCG1	363.168	1.92361	0.00140137	TRUE	FALSE	TRUE	FALSE	BosSINE2	+	6
ctg1-145340656-145340905	81.2167	89.9431	70.2648	19.6783	0.000707298	0.0243453	LOC100849587	9.69775	-1.99561	0.00976416	TRUE	TRUE	FALSE	FALSE	BosSINEL	+	10
ctg1-145531642-145531966	78.9868	86.8854	69.2654	17.62	0.00158966	0.0351234	PCBP3	14.6669	-2.06395	0.00267358	TRUE	FALSE	TRUE	FALSE	BosSINE1	-	3
ctg1-145877439-145877555	88.0951	96.099	78.5029	17.5961	0.00158119	0.0351234	SPATC1L	5.36292	-2.4128	0.0182606	TRUE	FALSE	TRUE	FALSE	BosSINE3	+	4
ctg1-146278567-146278840	75.9248	88.1282	60.6307	27.4976	0.000473624	0.0209513	S100B	1573.5	-4.58026	2.34e-06	TRUE	FALSE	TRUE	FALSE	BosSINEL	-	6
ctg1-150544447-150544642	74.733	88.8714	57.3321	31.5393	5.74679e-06	0.00881238	KCNJ15	9.81534	-1.34207	0.0349585	TRUE	FALSE	TRUE	FALSE	BosSINE2	-	6
ctg1-150553070-150553377	79.2298	88.0756	68.6494	19.4262	0.00038477	0.0194558	KCNJ15	9.81534	-1.34207	0.0349585	TRUE	FALSE	TRUE	FALSE	BosSINE1	-	3
ctg1-150782742-150782935	26.292	11.7302	45.2253	-33.4951	0.000473624	0.0209513	ERG	54.6941	1.52704	0.00411014	TRUE	FALSE	TRUE	FALSE	BosSINE3	+	3
ctg1-150804379-150804582	40.5681	31.2586	52.026	-20.7674	1.49417e-05	0.0093863	ERG	54.6941	1.52704	0.00411014	TRUE	FALSE	TRUE	FALSE	BosSINE2	+	4
ctg1-151164900-151165087	75.011	90.396	56.1155	34.2805	0.00149782	0.0334817	ETS2	2781.31	2.05866	0.00137743	TRUE	FALSE	TRUE	FALSE	BosSINE3	+	5
ctg1-152640562-152640790	75.1928	81.8775	66.9654	14.9121	0.000858483	0.026256	BTD	36.7681	-1.14119	0.00530811	TRUE	FALSE	TRUE	FALSE	BosSINE2	+	5
ctg1-19331019-19331247	60.3464	50.2604	72.7771	-22.5167	0.000311152	0.0180281	LOC112447286	17.4248	1.01715	0.018315	TRUE	FALSE	TRUE	FALSE	BosSINE2	-	3
ctg1-19483184-19483377	91.6463	96.8392	85.7103	11.1289	0.0014074	0.0334817	CXADR	131.463	-2.60671	0.000221809	TRUE	FALSE	TRUE	FALSE	BosSINE3	+	3
ctg1-19483610-19483668	92.1986	97.2812	86.5008	10.7804	0.00136514	0.0331412	CXADR	131.463	-2.60671	0.000221809	TRUE	FALSE	TRUE	FALSE	BosSINEL	+	3
ctg1-19483680-19483846	81.7681	94.1945	68.1321	26.0625	0.000776789	0.026256	CXADR	131.463	-2.60671	0.000221809	TRUE	FALSE	TRUE	FALSE	BosSINE2	-	3
ctg1-19484904-19485071	59.8343	73.0093	44.4526	28.5568	3.52765e-05	0.0107934	CXADR	131.463	-2.60671	0.000221809	TRUE	FALSE	TRUE	FALSE	BosSINE3	+	6
ctg1-22251507-22251736	85.5304	93.2722	76.4008	16.8714	0.000126017	0.013894	LOC107132175	199.099	1.20171	0.0358261	TRUE	FALSE	TRUE	FALSE	BosSINE2	+	5
ctg1-22268889-22269101	85.4011	92.7205	76.4043	16.3161	0.00038477	0.0194558	LOC107132175	199.099	1.20171	0.0358261	TRUE	FALSE	TRUE	FALSE	BosSINE3	-	4
ctg1-22290647-22290920	87.0854	92.7469	80.2156	12.5313	2.00696e-05	0.0097305	LOC107132175	199.099	1.20171	0.0358261	TRUE	TRUE	FALSE	FALSE	BosSINEL	-	7
ctg1-22619882-22620075	17.802	3.77729	34.7449	-30.9676	0.00083335	0.026256	SAMSN1	4536.27	1.05407	0.029872	TRUE	FALSE	TRUE	FALSE	BosSINE3	-	3
ctg1-24973589-24973859	75.6898	83.8948	65.7254	18.1695	7.73607e-05	0.0124599	ROBO2	11.7305	-4.32834	0.000177088	TRUE	FALSE	TRUE	FALSE	BosSINEL	+	7
ctg1-36158639-36158770	80.2351	93.7177	63.1635	30.5542	9.90217e-05	0.0132745	C1H3orf38	1887.5	1.53424	0.000585454	TRUE	FALSE	TRUE	FALSE	BosSINE6	+	3
ctg1-3826209-3826397	84.5941	95.0492	71.2735	23.7757	0.000126017	0.013894	SOD1	424.808	-1.01188	0.00773246	TRUE	FALSE	TRUE	FALSE	BosSINEL	+	5
ctg1-3835092-3835299	66.1419	75.4734	54.2427	21.2307	0.00038477	0.0194558	SOD1	424.808	-1.01188	0.00773246	TRUE	FALSE	FALSE	TRUE	BosSINE2	+	6
ctg1-41433744-41433931	75.3329	87.6307	60.6933	26.9374	0.000473624	0.0209513	EPHA6	2.31299	-3.43001	0.0465657	TRUE	FALSE	TRUE	FALSE	BosSINE2	+	4
ctg1-44554770-44554898	27.1307	22.624	32.6776	-10.0536	0.00103778	0.0285926	TBC1D23	2768	1.30296	0.000969626	TRUE	FALSE	FALSE	TRUE	BosSINEL	-	6
ctg1-52765823-52766043	78.6768	84.8971	70.7868	14.1104	0.00126597	0.0309714	CD47	4819.54	1.02708	0.000723483	TRUE	FALSE	TRUE	FALSE	BosSINE2	-	4
ctg1-52771824-52772006	81.5623	93.7886	66.7288	27.0597	0.00230253	0.0418835	CD47	4819.54	1.02708	0.000723483	TRUE	FALSE	TRUE	FALSE	BosSINE1	+	6
ctg1-52772898-52773152	79.6154	86.0318	71.917	14.1148	0.000126017	0.013894	CD47	4819.54	1.02708	0.000723483	TRUE	FALSE	TRUE	FALSE	BosSINEL	+	7
ctg1-52778621-52778852	67.1931	78.8635	52.8295	26.0341	0.00015926	0.0148443	CD47	4819.54	1.02708	0.000723483	TRUE	FALSE	FALSE	TRUE	BosSINE3	+	3
ctg1-56587514-56587775	83.1831	87.9716	77.3961	10.5755	0.00103778	0.0285926	PHLDB2	101.649	-3.14946	2.36e-05	TRUE	FALSE	TRUE	FALSE	BosSINEL	+	5
ctg1-56695391-56695666	74.8958	82.0718	66.4113	15.6606	0.00149782	0.0334817	PHLDB2	101.649	-3.14946	2.36e-05	TRUE	FALSE	TRUE	FALSE	BosSINEL	-	7
ctg1-57237104-57237380	74.3656	85.8323	60.138	25.6943	0.00038477	0.0194558	BTLA	76.6203	3.29175	0.000202923	TRUE	FALSE	TRUE	FALSE	BosSINEL	-	9
ctg1-58520041-58520309	84.4781	94.775	71.9365	22.8384	0.000311152	0.0180281	GRAMD1C	105.988	-1.45345	0.0106535	TRUE	FALSE	TRUE	FALSE	BosSINEL	+	8
ctg1-58530059-58530281	90.1364	95.3771	84.2518	11.1253	2.67594e-05	0.0103792	GRAMD1C	105.988	-1.45345	0.0106535	TRUE	FALSE	TRUE	FALSE	BosSINE2	+	8
ctg1-58539392-58539585	88.7189	95.1654	81.9718	13.1936	0.000145894	0.0148443	GRAMD1C	105.988	-1.45345	0.0106535	TRUE	FALSE	TRUE	FALSE	BosSINEL	+	3
ctg1-60800126-60800351	79.999	74.1266	87.2946	-13.1681	0.00212864	0.0396247	LSAMP	4.2157	-2.71391	0.0350919	TRUE	FALSE	TRUE	FALSE	BosSINE2	+	4
ctg1-65142462-65142739	82.836	91.2112	72.1018	19.1094	0.00015926	0.0148443	FSTL1	80.7287	-2.67128	3.77e-07	TRUE	FALSE	TRUE	FALSE	BosSINEL	+	11
ctg1-65647572-65647772	80.8184	86.5625	74.0122	12.5503	0.000669587	0.0243453	STXBP5L	3.27303	-3.58522	0.0141306	TRUE	FALSE	TRUE	FALSE	BosSINE3	+	4
ctg1-67010518-67010723	54.0571	46.9068	63.1456	-16.2388	0.00149782	0.0334817	PARP14	2132.95	1.42472	0.00189642	TRUE	FALSE	FALSE	TRUE	BosSINE3	+	6
ctg1-6802858-6803038	69.9613	84.18	51.8383	32.3417	0.000311152	0.0180281	BACH1	3687.93	1.37376	0.000867828	TRUE	TRUE	FALSE	FALSE	BosSINE4	+	5
ctg1-68470082-68470288	73.4571	66.9682	81.5727	-14.6046	0.000580014	0.0224556	KALRN	45.2481	-1.70607	0.00197595	TRUE	FALSE	TRUE	FALSE	BosSINE3	-	4
ctg1-68482325-68482599	83.8867	88.8777	77.6481	11.2296	0.00149782	0.0334817	KALRN	45.2481	-1.70607	0.00197595	TRUE	FALSE	TRUE	FALSE	BosSINEL	+	11
ctg1-68689109-68689330	38.5241	30.147	48.6659	-18.5189	1.49417e-05	0.0093863	KALRN	45.2481	-1.70607	0.00197595	TRUE	FALSE	TRUE	FALSE	BosSINEL	+	8
ctg1-72934660-72934846	89.286	95.6857	81.7478	13.9379	0.00307205	0.0476466	TMEM44	8.38848	-1.63676	0.00723013	TRUE	FALSE	TRUE	FALSE	BosSINE2	-	4
ctg1-73886646-73886906	83.9102	93.958	72.5733	21.3847	5.9973e-05	0.011619	LOC104970904	2.8435	-7.32827	8.93e-05	TRUE	FALSE	TRUE	FALSE	BosSINEL	+	6
ctg1-74017770-74018044	78.4497	87.1431	67.75	19.3931	0.00038477	0.0194558	ATP13A4	169.758	-2.34846	0.0148312	TRUE	FALSE	TRUE	FALSE	BosSINEL	-	10
ctg1-76534000-76534115	42.4724	48.575	34.9615	13.6135	0.000311152	0.0180281	IL1RAP	4898.69	1.78744	0.00220941	TRUE	FALSE	TRUE	FALSE	BosSINE3	-	5
ctg1-80032016-80032276	89.3432	94.308	83.2928	11.0152	0.000673181	0.0243453	MASP1	38.174	-6.17813	1.78e-07	TRUE	FALSE	TRUE	FALSE	BosSINEL	-	6
ctg1-81620301-81620430	35.3037	41.2165	28.0264	13.1901	0.00298141	0.0468558	SENP2	946.25	1.01215	0.0152488	TRUE	FALSE	TRUE	FALSE	BosSINEL	+	7
ctg1-81755305-81755426	73.7491	90.918	52.6183	38.2997	3.52765e-05	0.0107934	MAP3K13	155.048	-1.46162	0.00349994	TRUE	FALSE	TRUE	FALSE	BosSINE2	-	4
ctg1-81834050-81834256	87.8862	97.5728	75.9643	21.6085	0.000349194	0.0194558	MAP3K13	155.048	-1.46162	0.00349994	TRUE	TRUE	FALSE	FALSE	BosSINE3	-	7
ctg1-81865933-81866205	80.2163	86.9973	72.0614	14.9359	0.000311152	0.0180281	MAP3K13	155.048	-1.46162	0.00349994	TRUE	FALSE	TRUE	FALSE	BosSINEL	+	7
ctg1-81866721-81866907	90.9409	95.511	84.759	10.7521	0.00156854	0.0348971	MAP3K13	155.048	-1.46162	0.00349994	TRUE	FALSE	TRUE	FALSE	BosSINE2	+	3
ctg1-81867114-81867315	87.1937	95.8658	76.6207	19.2451	7.73607e-05	0.0124599	MAP3K13	155.048	-1.46162	0.00349994	TRUE	FALSE	TRUE	FALSE	BosSINE2	+	7
ctg1-82614552-82614826	84.9313	91.3505	76.9855	14.365	0.00212864	0.0396247	EPHB3	43.2305	-3.0359	1.21e-05	TRUE	FALSE	TRUE	FALSE	BosSINEL	-	6
ctg1-82627383-82627499	78.175	93.3461	59.5029	33.8432	0.000225856	0.0167908	EPHB3	43.2305	-3.0359	1.21e-05	TRUE	FALSE	TRUE	FALSE	BosSINE1	+	4
ctg1-87461921-87461998	84.2063	95.1769	70.4897	24.6872	0.000246148	0.0167908	USP13	110.906	-1.1467	0.0149457	TRUE	FALSE	TRUE	FALSE	BosSINE2	-	5
ctg1-896032-896223	77.6248	71.8925	83.8954	-12.0028	0.000580014	0.0224556	RCAN1	900.672	-1.70126	9.8e-07	TRUE	FALSE	TRUE	FALSE	BosSINE3	+	5
ctg1-962499-962683	92.3571	97.4271	85.5972	11.8299	0.00251463	0.0430208	RCAN1	900.672	-1.70126	9.8e-07	TRUE	FALSE	TRUE	FALSE	BosSINE1	+	3
ctg10-100244793-100244949	50.6717	58.4875	41.14	17.3475	0.000858483	0.026256	PTPN21	108.932	-2.45122	4.63e-08	TRUE	FALSE	TRUE	FALSE	BosSINE1	-	5
ctg10-101775815-101776020	88.9155	94.5092	82.1251	12.3841	0.000473624	0.0209513	LOC112448536	23.421	1.62944	0.00239719	TRUE	TRUE	FALSE	FALSE	BosSINE3	+	8
ctg10-102175061-102175268	85.7665	90.8768	79.4769	11.3999	0.00158966	0.0351234	TTC7B	67.2	-1.49356	0.00561826	TRUE	FALSE	TRUE	FALSE	BosSINE3	-	7
ctg10-102276431-102276649	75.2301	82.18	66.6299	15.5501	0.000200254	0.0158399	TTC7B	67.2	-1.49356	0.00561826	TRUE	FALSE	TRUE	FALSE	BosSINE3	+	3
ctg10-102372790-102372975	83.3434	90.9825	73.9342	17.0483	0.000200254	0.0158399	TTC7B	67.2	-1.49356	0.00561826	TRUE	FALSE	TRUE	FALSE	BosSINE2	-	4
ctg10-102396577-102396797	86.8568	94.5282	77.5777	16.9505	0.000348606	0.0194558	TTC7B	67.2	-1.49356	0.00561826	TRUE	FALSE	TRUE	FALSE	BosSINE3	-	5
ctg10-15433952-15434074	79.4445	91.2833	64.3626	26.9207	0.00282952	0.0468558	CORO2B	14.1916	-4.21417	0.00011297	TRUE	FALSE	TRUE	FALSE	BosSINE6	-	3
ctg10-1545098-1545369	79.6993	86.6343	71.373	15.2613	7.73607e-05	0.0124599	EPB41L4A	138.311	-3.80041	2.33e-05	TRUE	FALSE	TRUE	FALSE	BosSINEL	+	5
ctg10-15493475-15493657	62.3465	70.2138	52.6692	17.5446	0.000858483	0.026256	CORO2B	14.1916	-4.21417	0.00011297	TRUE	FALSE	TRUE	FALSE	BosSINE4	+	3
ctg10-1555774-1556038	83.8893	89.4641	77.4082	12.0558	0.00038477	0.0194558	EPB41L4A	138.311	-3.80041	2.33e-05	TRUE	FALSE	TRUE	FALSE	BosSINEL	+	7
ctg10-1676067-1676268	77.1254	83.6488	68.7678	14.881	0.00015926	0.0148443	EPB41L4A	138.311	-3.80041	2.33e-05	TRUE	FALSE	TRUE	FALSE	BosSINE2	-	5
ctg10-19898350-19898512	80.0557	86.5729	72.0346	14.5383	0.00108524	0.0293547	NEO1	88.1344	-3.60039	1.43e-05	TRUE	FALSE	TRUE	FALSE	BosSINE1	-	3
ctg10-19922252-19922431	67.2115	74.3844	58.3833	16.001	0.00149782	0.0334817	NEO1	88.1344	-3.60039	1.43e-05	TRUE	FALSE	TRUE	FALSE	BosSINE4	+	3
ctg10-21719123-21719337	82.3317	95.1444	66.5623	28.5821	0.000227883	0.0167908	SLC7A8	213.581	-1.7257	7.83e-06	TRUE	FALSE	TRUE	FALSE	BosSINE3	+	5
ctg10-26593224-26593435	82.0732	90.8479	70.3736	20.4743	0.00038477	0.0194558	RNASE10	430.037	1.75823	0.018315	TRUE	TRUE	FALSE	FALSE	BosSINE3	-	3
ctg10-28625449-28625721	38.6129	28.6949	50.9319	-22.237	0.00298141	0.0468558	AVEN	116.609	-1.31714	0.00330992	TRUE	FALSE	TRUE	FALSE	BosSINEL	-	10
ctg10-28812215-28812267	91.3327	97.4707	83.8769	13.5937	0.000567478	0.0224556	RYR3	49.5664	-3.59811	2.31e-05	TRUE	FALSE	TRUE	FALSE	BosSINE1	-	5
ctg10-30536106-30536288	86.3488	93.4122	78.1144	15.2978	0.000858483	0.026256	LOC101903851	7.86939	-3.69004	0.000148728	TRUE	TRUE	FALSE	FALSE	BosSINE2	-	4
ctg10-30536123-30536329	86.3488	93.4122	78.1144	15.2978	0.000858483	0.026256	LOC101903851	7.86939	-3.69004	0.000148728	TRUE	TRUE	FALSE	FALSE	BosSINE3	-	4
ctg10-36364464-36364734	86.9632	91.6252	81.1349	10.4903	0.000707298	0.0243453	PPP1R14D	32.2073	-2.81798	0.00111409	TRUE	FALSE	TRUE	FALSE	BosSINEL	-	5
ctg10-37732397-37732833	76.6802	84.5371	67.0605	17.4766	0.000311152	0.0180281	CAPN3	181.484	1.40395	0.0091975	TRUE	FALSE	TRUE	FALSE	BosSINEL	+	9
ctg10-40006319-40006449	80.6183	91.1127	67.4623	23.6504	0.00265228	0.0446645	MDGA2	2.11719	-2.75643	0.0442977	TRUE	FALSE	TRUE	FALSE	BosSINEL	-	6
ctg10-40459803-40460072	80.7931	88.2259	70.3796	17.8462	0.000707298	0.0243453	MDGA2	2.11719	-2.75643	0.0442977	TRUE	FALSE	TRUE	FALSE	BosSINEL	-	5
ctg10-40471978-40472252	86.2144	92.1531	79.2125	12.9406	0.000414629	0.0205211	MDGA2	2.11719	-2.75643	0.0442977	TRUE	FALSE	TRUE	FALSE	BosSINEL	+	4
ctg10-4162641-4162917	88.9446	94.4196	82.206	12.2136	0.000250236	0.0167908	CCDC112	225.809	2.01301	1.44e-05	TRUE	FALSE	TRUE	FALSE	BosSINEL	+	7
ctg10-4239286-4239496	82.4038	91.8055	70.6269	21.1786	0.000311152	0.0180281	CCDC112	225.809	2.01301	1.44e-05	TRUE	FALSE	TRUE	FALSE	BosSINE3	-	6
ctg10-43603784-43604059	85.3819	92.2467	76.9868	15.2599	0.00103778	0.0285926	NIN	2628.1	1.69025	0.000210742	TRUE	FALSE	TRUE	FALSE	BosSINEL	+	8
ctg10-44330939-44331132	78.6316	90.4866	62.2667	28.2199	0.00312165	0.0483505	FRMD6	115.931	-2.18131	0.000170198	TRUE	FALSE	TRUE	FALSE	BosSINE3	+	3
ctg10-47014932-47014954	88.0426	94.7625	78.5712	16.1913	0.000900954	0.0274994	TPM1	904.651	-2.38767	0.000377915	TRUE	FALSE	TRUE	FALSE	BosSINE2	+	6
ctg10-47254973-47255185	73.7134	79.2031	66.9569	12.2462	0.00038477	0.0194558	TLN2	131.286	-3.86897	6.71e-05	TRUE	FALSE	TRUE	FALSE	BosSINE3	+	5
ctg10-47332016-47332228	74.0707	84.5969	61.3279	23.269	0.00252352	0.0430208	TLN2	131.286	-3.86897	6.71e-05	TRUE	FALSE	TRUE	FALSE	BosSINE2	-	4
ctg10-47420211-47420404	73.8229	85.4985	58.9877	26.5108	0.00212864	0.0396247	TLN2	131.286	-3.86897	6.71e-05	TRUE	FALSE	TRUE	FALSE	BosSINE3	+	3
ctg10-47443217-47443405	75.1146	86.5494	60.7806	25.7687	0.000580014	0.0224556	TLN2	131.286	-3.86897	6.71e-05	TRUE	FALSE	TRUE	FALSE	BosSINE3	-	5
ctg10-47655837-47655953	84.9891	94.2365	73.6077	20.6288	2.67594e-05	0.0103792	TLN2	131.286	-3.86897	6.71e-05	TRUE	FALSE	TRUE	FALSE	BosSINE3	+	3
ctg10-47713282-47713488	86.7038	91.4089	80.8265	10.5824	0.000580014	0.0224556	TLN2	131.286	-3.86897	6.71e-05	TRUE	FALSE	TRUE	FALSE	BosSINE2	+	3
ctg10-47716448-47716573	80.7261	92.2089	67.4065	24.8024	1.49417e-05	0.0093863	TLN2	131.286	-3.86897	6.71e-05	TRUE	FALSE	TRUE	FALSE	BosSINE6	+	5
ctg10-47901894-47901998	62.6483	55.4562	71.5	-16.0437	3.74489e-05	0.011357	C2CD4B	27.01	-3.31422	3.34e-05	TRUE	FALSE	FALSE	TRUE	BosSINE5	+	3
ctg10-52696510-52696717	84.5845	93.6414	73.4375	20.2039	0.000126017	0.013894	MYZAP	47.073	-3.16336	0.000320524	TRUE	FALSE	TRUE	FALSE	BosSINE2	+	4
ctg10-52705274-52705393	78.0908	87.6646	66.3077	21.3569	9.90217e-05	0.0132745	MYZAP	47.073	-3.16336	0.000320524	TRUE	FALSE	TRUE	FALSE	BosSINE6	+	3
ctg10-52711291-52711531	80.1396	86.8575	72.0546	14.8029	0.000858483	0.026256	MYZAP	47.073	-3.16336	0.000320524	TRUE	FALSE	TRUE	FALSE	BosSINEL	-	5
ctg10-52717622-52717789	76.4678	84.3236	66.8438	17.4798	0.000126017	0.013894	MYZAP	47.073	-3.16336	0.000320524	TRUE	FALSE	TRUE	FALSE	BosSINE3	-	5
ctg10-581867-582272	84.4581	90.4834	77.6793	12.8041	0.000707298	0.0243453	MCC	58.906	-3.75885	2.39e-05	TRUE	FALSE	TRUE	FALSE	BosSINEL	+	10
ctg10-60142255-60142529	24.7183	13.3178	38.3898	-25.072	0.00298141	0.0468558	ATP8B4	683.331	1.28229	0.00702541	TRUE	FALSE	TRUE	FALSE	BosSINEL	+	9
ctg10-60332840-60333043	86.8866	92.8689	79.5002	13.3687	0.000707298	0.0243453	ATP8B4	683.331	1.28229	0.00702541	TRUE	FALSE	TRUE	FALSE	BosSINE2	+	3
ctg10-62668828-62668998	78.7139	90.2878	65.0585	25.2293	0.000473624	0.0209513	SEMA6D	22.1799	-4.7989	7.03e-05	TRUE	FALSE	TRUE	FALSE	BosSINEL	+	9
ctg10-62688562-62688769	82.1034	87.3266	75.675	11.6516	0.00212864	0.0396247	SEMA6D	22.1799	-4.7989	7.03e-05	TRUE	FALSE	TRUE	FALSE	BosSINE3	-	4
ctg10-65244981-65245186	79.8597	93.7367	62.7119	31.0248	0.000200254	0.0158399	SHF	54.0753	-1.99092	0.00456765	TRUE	FALSE	TRUE	FALSE	BosSINE3	+	4
ctg10-7407857-7408131	85.4386	90.6862	79.589	11.0972	0.000311152	0.0180281	SV2C	14.2131	-3.34524	0.0443175	TRUE	FALSE	TRUE	FALSE	BosSINEL	+	4
ctg10-7465599-7465755	31.8922	20.539	45.9111	-25.372	0.000858483	0.026256	SV2C	14.2131	-3.34524	0.0443175	TRUE	FALSE	TRUE	FALSE	BosSINE3	+	4
ctg10-76113148-76113287	19.6883	9.08549	31.3885	-22.303	0.00126071	0.0309714	SYNE2	666.44	-1.40028	0.00439759	TRUE	FALSE	TRUE	FALSE	BosSINE6	-	4
ctg10-79443519-79443737	86.5207	91.4104	80.5026	10.9079	0.000311152	0.0180281	PLEKHH1	55.4507	-1.75563	0.00249251	TRUE	FALSE	TRUE	FALSE	BosSINE2	-	3
ctg10-81064853-81065070	82.4499	89.101	74.0835	15.0175	0.00124915	0.0309714	GALNT16	6.95669	-2.29291	0.000454283	TRUE	FALSE	TRUE	FALSE	BosSINE1	-	5
ctg10-81108796-81108997	81.0591	86.1047	74.849	11.2556	0.00252352	0.0430208	GALNT16	6.95669	-2.29291	0.000454283	TRUE	FALSE	TRUE	FALSE	BosSINE2	+	4
ctg10-81384937-81385145	90.8194	95.3085	85.2141	10.0944	0.000915159	0.027861	SUSD6	5062.64	2.07587	4.9e-05	TRUE	FALSE	TRUE	FALSE	BosSINE3	-	3
ctg10-82303117-82303315	73.4501	89.0478	54.7969	34.2509	0.00038477	0.0194558	TTC9	144.901	-1.13566	0.0485171	TRUE	FALSE	TRUE	FALSE	BosSINE3	+	7
ctg10-82372954-82373085	73.4588	68.1347	80.0687	-11.934	0.00124915	0.0309714	MAP3K9	63.9653	-1.26919	0.0151421	TRUE	TRUE	FALSE	FALSE	BosSINEL	-	6
ctg10-86720133-86720261	86.0684	96.0802	73.7462	22.3341	4.09121e-05	0.0113782	BATF	64.6569	1.38864	0.0012763	TRUE	FALSE	TRUE	FALSE	BosSINE6	-	3
ctg10-87264590-87264837	35.7298	30.5111	42.044	-11.5329	3.52765e-05	0.0107934	TGFB3	16.8671	-1.47792	0.0103132	TRUE	FALSE	TRUE	FALSE	BosSINEL	+	9
ctg10-87634129-87634241	84.7085	89.726	78.49	11.2361	0.00015926	0.0148443	ESRRB	8.62888	-4.58051	0.000148333	TRUE	FALSE	TRUE	FALSE	BosSINE6	+	3
ctg10-87724115-87724226	74.577	79.4594	68.5679	10.8914	0.00307205	0.0476466	ESRRB	8.62888	-4.58051	0.000148333	TRUE	FALSE	TRUE	FALSE	BosSINE2	+	3
ctg10-87736066-87736185	68.1725	84.543	50.9423	33.6007	0.001255	0.0309714	ESRRB	8.62888	-4.58051	0.000148333	TRUE	FALSE	TRUE	FALSE	BosSINE6	-	4
ctg10-91508240-91508442	78.9309	87.0866	69.0358	18.0507	0.00038477	0.0194558	LOC101905198	12.347	-4.63585	0.000206657	TRUE	FALSE	TRUE	FALSE	BosSINE3	+	4
ctg10-92578487-92578564	82.4644	88.5594	74.9628	13.5966	9.90217e-05	0.0132745	STON2	1060.67	-2.17927	3.96e-05	TRUE	FALSE	TRUE	FALSE	BosSINE3	-	3
ctg10-92607927-92608143	75.3129	88.0641	59.1694	28.8946	0.00124915	0.0309714	STON2	1060.67	-2.17927	3.96e-05	TRUE	FALSE	TRUE	FALSE	BosSINE2	+	8
ctg11-101767052-101767245	86.4862	92.7315	78.8656	13.8659	0.00178879	0.0363949	RAPGEF1	7377.91	1.37465	0.00129921	TRUE	FALSE	TRUE	FALSE	BosSINE3	-	6
ctg11-102866292-102866369	88.0989	93.6012	81.5558	12.0454	0.00147414	0.0334817	AK8	27.216	-1.47132	0.00671999	TRUE	FALSE	TRUE	FALSE	BosSINE3	-	6
ctg11-102892074-102892332	50.5695	46.1609	56.2244	-10.0635	0.00252352	0.0430208	AK8	27.216	-1.47132	0.00671999	TRUE	FALSE	TRUE	FALSE	BosSINEL	+	10
ctg11-103972506-103972716	91.7996	96.5348	85.9716	10.5631	1.97454e-06	0.00754262	NOTCH1	7382.41	1.41432	0.00635755	TRUE	FALSE	TRUE	FALSE	BosSINE2	+	8
ctg11-11353548-11353809	83.612	88.7387	77.8347	10.9041	0.00103778	0.0285926	RAB11FIP5	402.074	-1.40332	9.8e-07	TRUE	FALSE	TRUE	FALSE	BosSINEL	+	8
ctg11-11359026-11359152	75.8151	70.5701	82.1712	-11.6011	0.00149782	0.0334817	RAB11FIP5	402.074	-1.40332	9.8e-07	TRUE	FALSE	TRUE	FALSE	BosSINE6	-	4
ctg11-11365615-11365834	89.5901	96.3259	81.2217	15.1042	0.000200254	0.0158399	RAB11FIP5	402.074	-1.40332	9.8e-07	TRUE	FALSE	TRUE	FALSE	BosSINE2	+	6
ctg11-1191503-1191720	64.8192	56.7375	74.7676	-18.0301	0.000580014	0.0224556	BCL2L11	4126.98	1.73739	0.000184114	TRUE	FALSE	TRUE	FALSE	BosSINE3	+	8
ctg11-1273908-1274127	82.9395	90.3129	73.9637	16.3493	0.00252352	0.0430208	ACOXL	24.4189	1.95979	0.000242311	TRUE	FALSE	TRUE	FALSE	BosSINE2	-	6
ctg11-1279829-1280036	83.7743	92.9665	72.3489	20.6177	0.000707298	0.0243453	ACOXL	24.4189	1.95979	0.000242311	TRUE	FALSE	TRUE	FALSE	BosSINE3	+	4
ctg11-14175143-14175353	85.419	91.8156	77.5462	14.2695	0.00178879	0.0363949	XDH	16603.9	-1.49286	0.0269182	TRUE	FALSE	TRUE	FALSE	BosSINE2	+	5
ctg11-14202741-14202949	89.2872	95.5362	81.5962	13.9401	0.000450363	0.0209513	XDH	16603.9	-1.49286	0.0269182	TRUE	FALSE	TRUE	FALSE	BosSINE3	+	5
ctg11-1478004-1478204	79.2195	86.2203	70.8615	15.3588	0.000858483	0.026256	ACOXL	24.4189	1.95979	0.000242311	TRUE	FALSE	TRUE	FALSE	BosSINE3	-	3
ctg11-14892073-14892206	90.6901	96.2272	83.9768	12.2505	0.000782573	0.026256	YIPF4	1610.64	1.22783	0.000642787	TRUE	FALSE	TRUE	FALSE	BosSINE3	-	4
ctg11-15588629-15588933	78.5686	73.4573	84.65	-11.1927	0.000858483	0.026256	LTBP1	87.4741	-2.85789	8.72e-05	TRUE	FALSE	TRUE	FALSE	BosSINE1	+	4
ctg11-1772909-1773117	66.5753	76.2875	54.6218	21.6657	5.9973e-05	0.011619	MALL	129.724	-3.01363	0.000155717	TRUE	FALSE	FALSE	TRUE	BosSINE3	-	3
ctg11-1781066-1781262	71.9463	84.8692	56.9439	27.9253	0.00171346	0.0363949	MALL	129.724	-3.01363	0.000155717	TRUE	FALSE	TRUE	FALSE	BosSINE3	+	3
ctg11-1796204-1796382	86.0482	92.4442	77.9514	14.4927	0.000580014	0.0224556	MALL	129.724	-3.01363	0.000155717	TRUE	FALSE	TRUE	FALSE	BosSINE3	-	4
ctg11-1857247-1857499	39.0675	29.9593	50.2434	-20.284	8.01604e-06	0.00881238	MAL	5.24186	-4.43713	0.000353258	TRUE	FALSE	TRUE	FALSE	BosSINEL	+	7
ctg11-21019529-21019724	86.5329	95.2891	75.9564	19.3327	0.000924575	0.0278673	GALM	719.489	-2.80842	0.000153642	TRUE	FALSE	FALSE	TRUE	BosSINE3	+	3
ctg11-21067897-21068120	80.984	87.5475	72.9808	14.5668	0.00038477	0.0194558	GALM	719.489	-2.80842	0.000153642	TRUE	FALSE	TRUE	FALSE	BosSINE2	-	5
ctg11-24542098-24542178	91.0207	95.9865	84.909	11.0775	0.00265874	0.0446645	LOC112448762	40.8142	1.27719	0.0279046	TRUE	FALSE	TRUE	FALSE	BosSINE3	+	3
ctg11-25488978-25489245	30.0273	18.0246	45.2779	-27.2533	0.00178879	0.0363949	LOC112448767	11.7202	2.44046	0.00236092	TRUE	TRUE	FALSE	FALSE	BosSINEL	-	8
ctg11-3401406-3401533	28.3514	12.7156	47.5954	-34.8798	0.000126017	0.013894	VWA3B	27.6182	1.38579	0.00704392	TRUE	FALSE	TRUE	FALSE	BosSINE6	+	5
ctg11-37694036-37694162	78.8522	89.252	65.7828	23.4692	0.00015926	0.0148443	EML6	10.255	-1.78928	0.0292228	TRUE	FALSE	TRUE	FALSE	BosSINEL	+	5
ctg11-37704941-37705211	75.5858	89.3456	59.0161	30.3295	9.90217e-05	0.0132745	EML6	10.255	-1.78928	0.0292228	TRUE	FALSE	TRUE	FALSE	BosSINEL	-	6
ctg11-44377724-44377938	80.6336	91.2671	67.2545	24.0125	0.000473624	0.0209513	SH3RF3	21.4151	-2.35483	3.3e-07	TRUE	FALSE	TRUE	FALSE	BosSINE3	-	6
ctg11-49678662-49678867	88.4665	95.5256	79.6052	15.9204	0.00265874	0.0446645	TCF7L1	34.0816	-2.32422	0.000418559	TRUE	FALSE	TRUE	FALSE	BosSINE2	+	5
ctg11-49710252-49710465	84.4538	93.7256	72.7155	21.0101	0.000412587	0.0205211	TCF7L1	34.0816	-2.32422	0.000418559	TRUE	FALSE	TRUE	FALSE	BosSINE2	+	5
ctg11-49801881-49802082	81.2856	89.576	71.0821	18.494	0.000793191	0.026256	TCF7L1	34.0816	-2.32422	0.000418559	TRUE	FALSE	TRUE	FALSE	BosSINE2	-	3
ctg11-55707424-55707635	69.0169	81.6615	54.1462	27.5153	0.00178879	0.0363949	CTNNA2	7.94382	-4.24187	0.000437829	TRUE	FALSE	TRUE	FALSE	BosSINE2	-	3
ctg11-5787222-5787421	72.8016	85.5628	58.0346	27.5282	1.09926e-05	0.00901759	NPAS2	36.136	-1.91975	0.0163505	TRUE	FALSE	TRUE	FALSE	BosSINE3	+	4
ctg11-6063979-6064200	79.0656	84.9772	71.7572	13.2201	0.000200254	0.0158399	TBC1D8	464.155	1.01886	0.0109539	TRUE	FALSE	TRUE	FALSE	BosSINE2	+	6
ctg11-6093672-6093814	84.9713	94.2919	73.4673	20.8246	0.00169322	0.0363949	TBC1D8	464.155	1.01886	0.0109539	TRUE	FALSE	TRUE	FALSE	BosSINEL	-	3
ctg11-6095140-6095326	82.1068	94.1023	67.601	26.5013	0.000350963	0.0194558	TBC1D8	464.155	1.01886	0.0109539	TRUE	FALSE	TRUE	FALSE	BosSINE3	+	4
ctg11-6109348-6109616	90.9284	95.8322	85.0736	10.7587	0.00149782	0.0334817	TBC1D8	464.155	1.01886	0.0109539	TRUE	FALSE	TRUE	FALSE	BosSINEL	-	8
ctg11-6116657-6116853	25.9902	7.16979	49.1538	-41.9841	9.90217e-05	0.0132745	TBC1D8	464.155	1.01886	0.0109539	TRUE	FALSE	TRUE	FALSE	BosSINE3	-	3
ctg11-6173165-6173261	85.0885	90.5187	78.4051	12.1136	0.00298141	0.0468558	RNF149	3080.53	3.01068	5.51e-06	TRUE	TRUE	FALSE	FALSE	BosSINE3	+	3
ctg11-6206979-6207172	54.5728	62.3195	45.0385	17.2811	1.09926e-05	0.00901759	RNF149	3080.53	3.01068	5.51e-06	TRUE	FALSE	TRUE	FALSE	BosSINE2	-	4
ctg11-62547312-62547524	90.2583	95.2042	84.4923	10.7119	0.00103778	0.0285926	PELI1	3521.34	1.97992	0.000148946	TRUE	TRUE	FALSE	FALSE	BosSINE3	-	3
ctg11-6434558-6434772	84.2397	91.3804	75.4511	15.9293	0.00212864	0.0396247	LOC107132901	83.7812	3.20724	0.000355534	TRUE	FALSE	TRUE	FALSE	BosSINE2	+	7
ctg11-6443501-6443715	16.4192	6.11236	28.9256	-22.8133	0.000847085	0.026256	LOC107132901	83.7812	3.20724	0.000355534	TRUE	TRUE	FALSE	FALSE	BosSINE3	+	3
ctg11-6533360-6533540	65.6747	73.6959	55.7985	17.8974	0.000858483	0.026256	MAP4K4	7592.89	1.46292	0.000227091	TRUE	FALSE	TRUE	FALSE	BosSINE2	+	6
ctg11-6606825-6606969	54.2595	44.5745	66.1795	-21.605	0.000580014	0.0224556	MAP4K4	7592.89	1.46292	0.000227091	TRUE	FALSE	TRUE	FALSE	BosSINE3	+	6
ctg11-6619248-6619327	42.6879	30.3547	57.8673	-27.5126	0.00124915	0.0309714	MAP4K4	7592.89	1.46292	0.000227091	TRUE	FALSE	TRUE	FALSE	BosSINE3	-	4
ctg11-67121830-67122051	49.9422	42.3729	59.2583	-16.8854	8.84122e-07	0.00754262	ARHGAP25	1557.43	1.02877	7.22e-05	TRUE	FALSE	TRUE	FALSE	BosSINE2	+	6
ctg11-67153025-67153222	51.9023	40.874	65.4756	-24.6017	3.52765e-05	0.0107934	ARHGAP25	1557.43	1.02877	7.22e-05	TRUE	FALSE	TRUE	FALSE	BosSINE2	+	3
ctg11-71975600-71975808	85.6828	94.7258	74.5529	20.1729	0.00147414	0.0334817	LOC101905151	81.7117	-3.27805	2.01e-05	TRUE	FALSE	TRUE	FALSE	BosSINE3	+	4
ctg11-71980815-71980942	86.1354	94.7095	76.6125	18.097	7.73607e-05	0.0124599	LOC101905151	81.7117	-3.27805	2.01e-05	TRUE	TRUE	FALSE	FALSE	BosSINEL	+	4
ctg11-7386674-7386869	74.0615	83.9554	61.3957	22.5597	0.000707298	0.0243453	SLC9A2	1.9954	-2.73885	0.0371602	TRUE	FALSE	TRUE	FALSE	BosSINE3	+	3
ctg11-7399186-7399409	78.6248	83.8269	72.3304	11.4965	0.00103778	0.0285926	SLC9A2	1.9954	-2.73885	0.0371602	TRUE	FALSE	TRUE	FALSE	BosSINE2	-	5
ctg11-81009457-81009665	73.0989	83.0958	60.7949	22.301	0.00252352	0.0430208	VSNL1	3.88706	-4.00552	0.0053045	TRUE	FALSE	TRUE	FALSE	BosSINE3	+	3
ctg11-81061860-81062133	62.9375	75.5349	47.161	28.3739	0.00015926	0.0148443	VSNL1	3.88706	-4.00552	0.0053045	TRUE	FALSE	FALSE	TRUE	BosSINEL	-	6
ctg11-86146003-86146196	47.9707	53.0875	41.6731	11.4144	0.00124915	0.0309714	LPIN1	639.921	-2.37097	0.000611077	TRUE	FALSE	TRUE	FALSE	BosSINE3	-	3
ctg11-86157045-86157258	80.0372	90.2553	67.7474	22.5078	0.000858483	0.026256	LPIN1	639.921	-2.37097	0.000611077	TRUE	FALSE	TRUE	FALSE	BosSINE3	+	6
ctg11-86691624-86691898	76.0647	87.8661	61.5632	26.3029	0.00298141	0.0468558	LOC101904759	6.36672	-4.0364	0.00432171	TRUE	FALSE	TRUE	FALSE	BosSINEL	+	6
ctg11-87536591-87536796	75.881	68.926	84.441	-15.515	0.000126017	0.013894	CYS1	27.1321	-1.70923	0.000989807	TRUE	FALSE	TRUE	FALSE	BosSINE2	+	3
ctg11-87625531-87625654	85.0727	93.1834	75.5877	17.5957	0.00100411	0.0285926	GRHL1	134.188	-2.53901	0.000819233	TRUE	FALSE	TRUE	FALSE	BosSINE5	-	5
ctg11-92548166-92548350	75.7006	83.6969	65.859	17.8379	0.000707298	0.0243453	DAB2IP	91.3165	-3.3914	2.44e-05	TRUE	FALSE	TRUE	FALSE	BosSINE1	+	3
ctg11-92548536-92548728	75.2715	84.4537	62.781	21.6727	7.73607e-05	0.0124599	DAB2IP	91.3165	-3.3914	2.44e-05	TRUE	FALSE	TRUE	FALSE	BosSINE3	-	5
ctg11-92623525-92623702	73.1115	86.6991	56.9379	29.7612	8.01604e-06	0.00881238	DAB2IP	91.3165	-3.3914	2.44e-05	TRUE	FALSE	TRUE	FALSE	BosSINE1	-	6
ctg11-92638811-92639007	85.0072	90.9681	77.7413	13.2268	4.97299e-05	0.011619	DAB2IP	91.3165	-3.3914	2.44e-05	TRUE	FALSE	TRUE	FALSE	BosSINE3	-	7
ctg11-9569238-9569510	77.312	82.0252	71.5785	10.4467	0.00298141	0.0468558	TACR1	10.4001	-4.30364	0.00170264	TRUE	FALSE	TRUE	FALSE	BosSINEL	-	4
ctg11-97450631-97450761	79.7434	89.3517	67.9737	21.378	5.9973e-05	0.011619	LMX1B	13.9394	-1.95993	0.0182278	TRUE	FALSE	TRUE	FALSE	BosSINE3	+	5
ctg11-97716669-97716880	90.1566	96.4694	82.3869	14.0825	0.00265551	0.0446645	RALGPS1	74.9779	-1.02764	0.00295923	TRUE	FALSE	TRUE	FALSE	BosSINE2	+	5
ctg11-97720614-97720690	38.039	25.4911	54.8452	-29.3541	0.000229868	0.0167908	RALGPS1	74.9779	-1.02764	0.00295923	TRUE	FALSE	TRUE	FALSE	BosSINE3	-	3
ctg11-97903360-97903466	87.5145	95.3635	78.0495	17.314	0.000793191	0.026256	RALGPS1	74.9779	-1.02764	0.00295923	TRUE	FALSE	TRUE	FALSE	BosSINE1	+	5
ctg11-98055893-98056116	79.2351	89.7783	65.156	24.6223	0.000707298	0.0243453	GARNL3	14.2549	-2.02541	0.00709935	TRUE	FALSE	TRUE	FALSE	BosSINE2	+	6
ctg11-98454110-98454171	27.7017	16.1792	41.8833	-25.7042	0.00015926	0.0148443	SH2D3C	1319.25	1.78441	0.000968448	TRUE	FALSE	TRUE	FALSE	BosSINE5	+	3
ctg11-99003784-99003892	17.3375	2.77153	35.0395	-32.268	0.000287243	0.0180281	CERCAM	3.94093	-2.02254	0.0308276	TRUE	FALSE	FALSE	TRUE	BosSINE6	+	3
ctg11-99004003-99004226	47.6339	42.6228	53.8473	-11.2245	0.00178879	0.0363949	CERCAM	3.94093	-2.02254	0.0308276	TRUE	FALSE	FALSE	TRUE	BosSINEL	-	7
ctg11-99011103-99011232	26.742	13.8167	42.65	-28.8333	0.000580014	0.0224556	CERCAM	3.94093	-2.02254	0.0308276	TRUE	FALSE	TRUE	FALSE	BosSINE6	-	3
ctg11-99397791-99398010	85.1108	94.5156	74.0646	20.451	0.00126071	0.0309714	LRRC8A	473.767	-1.24281	2.69e-08	TRUE	FALSE	TRUE	FALSE	BosSINE2	+	5
ctg12-10659061-10659330	47.0061	38.5687	57.4139	-18.8452	3.52765e-05	0.0107934	OLFM4	206.844	2.64538	0.00152023	TRUE	FALSE	TRUE	FALSE	BosSINEL	-	9
ctg12-11200663-11200933	78.4457	82.9629	72.6874	10.2755	0.000473624	0.0209513	LOC101906638	33.037	1.63002	0.00285053	TRUE	TRUE	FALSE	FALSE	BosSINEL	+	9
ctg12-24226602-24226799	84.3646	89.3956	78.3223	11.0733	0.00252352	0.0430208	POSTN	14.5875	-2.65628	5.68e-05	TRUE	FALSE	TRUE	FALSE	BosSINE3	+	4
ctg12-25492204-25492276	82.7598	92.5213	70.6552	21.8661	0.00092863	0.0278673	DCLK1	100.242	-2.90527	1.71e-06	TRUE	FALSE	TRUE	FALSE	BosSINE3	-	3
ctg12-25667610-25667882	28.4599	14.8036	45.6223	-30.8188	3.52765e-05	0.0107934	DCLK1	100.242	-2.90527	1.71e-06	TRUE	FALSE	TRUE	FALSE	BosSINEL	+	7
ctg12-33587631-33587819	71.1391	82.278	58.4595	23.8185	0.00263206	0.0446486	ATP8A2	18.8794	-1.04055	0.0464068	TRUE	FALSE	TRUE	FALSE	BosSINE3	-	4
ctg12-33816629-33816831	85.0212	95.0009	73.2475	21.7534	0.00017594	0.0158399	ATP8A2	18.8794	-1.04055	0.0464068	TRUE	FALSE	TRUE	FALSE	BosSINE3	+	4
ctg12-33848392-33848597	67.7885	61.4382	75.7629	-14.3247	0.00149782	0.0334817	ATP8A2	18.8794	-1.04055	0.0464068	TRUE	FALSE	TRUE	FALSE	BosSINE2	+	4
ctg12-39740823-39740981	73.8973	83.4472	63.0282	20.419	1.49417e-05	0.0093863	PCDH9	21.4764	-1.52246	0.0129503	TRUE	FALSE	TRUE	FALSE	BosSINEL	+	3
ctg12-39927796-39928051	79.1295	84.4497	73.2756	11.1741	0.00149782	0.0334817	PCDH9	21.4764	-1.52246	0.0129503	TRUE	FALSE	TRUE	FALSE	BosSINEL	+	8
ctg12-40111190-40111400	72.6714	81.2658	61.3929	19.8729	0.00115179	0.0309714	PCDH9	21.4764	-1.52246	0.0129503	TRUE	FALSE	TRUE	FALSE	BosSINE2	+	3
ctg12-40121784-40121997	81.6324	87.9985	73.1196	14.879	7.73607e-05	0.0124599	PCDH9	21.4764	-1.52246	0.0129503	TRUE	FALSE	TRUE	FALSE	BosSINE2	+	4
ctg12-40178968-40179254	88.4348	93.9136	82.2787	11.6349	0.0021373	0.0396247	PCDH9	21.4764	-1.52246	0.0129503	TRUE	FALSE	TRUE	FALSE	BosSINE1	-	4
ctg12-40223394-40223626	54.8125	60.1083	48.5177	11.5906	0.000924575	0.0278673	PCDH9	21.4764	-1.52246	0.0129503	TRUE	FALSE	TRUE	FALSE	BosSINE2	-	3
ctg12-40394172-40394438	82.3667	87.8247	75.6282	12.1965	0.000707298	0.0243453	PCDH9	21.4764	-1.52246	0.0129503	TRUE	FALSE	TRUE	FALSE	BosSINEL	-	5
ctg12-40511161-40511366	90.2357	94.7156	84.5948	10.1209	0.000676282	0.0243453	PCDH9	21.4764	-1.52246	0.0129503	TRUE	FALSE	TRUE	FALSE	BosSINE3	+	4
ctg12-40577674-40577946	90.3755	95.0913	84.5966	10.4946	0.00149782	0.0334817	PCDH9	21.4764	-1.52246	0.0129503	TRUE	FALSE	TRUE	FALSE	BosSINEL	-	5
ctg12-75220735-75220869	68.1756	76.5001	57.9705	18.5296	0.000530614	0.0224556	FARP1	84.9814	-2.11122	0.000190874	TRUE	FALSE	TRUE	FALSE	BosSINE1	-	3
ctg12-75221321-75221588	87.8688	94.2613	79.5387	14.7226	2.00696e-05	0.0097305	FARP1	84.9814	-2.11122	0.000190874	TRUE	FALSE	TRUE	FALSE	BosSINEL	+	5
ctg12-75438812-75438970	83.9966	91.3992	74.8856	16.5136	0.000707298	0.0243453	FARP1	84.9814	-2.11122	0.000190874	TRUE	FALSE	TRUE	FALSE	BosSINE3	-	4
ctg12-84547610-84547773	21.2728	6.46674	38.4838	-32.017	5.9973e-05	0.011619	LOC101905776	55.0255	3.0134	0.000661861	TRUE	FALSE	FALSE	TRUE	BosSINE3	+	9
ctg12-85109886-85109977	85.2054	90.3129	79.5046	10.8083	0.00124915	0.0309714	COL4A2	25.2918	-2.24741	0.0227424	TRUE	FALSE	TRUE	FALSE	BosSINE2	-	5
ctg12-85112338-85112413	46.3198	39.3	54.9596	-15.6596	0.00103778	0.0285926	COL4A2	25.2918	-2.24741	0.0227424	TRUE	FALSE	TRUE	FALSE	BosSINE6	+	4
ctg12-85192193-85192298	77.108	90.2875	60.8872	29.4003	5.9973e-05	0.011619	RAB20	260.507	2.60265	5.65e-05	TRUE	FALSE	TRUE	FALSE	BosSINE6	+	3
ctg12-86590626-86590743	20.1222	6.99896	36.5249	-29.5259	2.00696e-05	0.0097305	LOC112449100	493.488	3.31991	7.05e-06	TRUE	TRUE	FALSE	FALSE	BosSINE6	+	6
ctg13-12471252-12471452	76.6592	89.5333	60.8141	28.7192	0.00015926	0.0148443	PROSER2	36.85	-3.37705	0.000141766	TRUE	FALSE	TRUE	FALSE	BosSINE2	-	3
ctg13-13146743-13146937	78.4372	92.7313	60.8446	31.8866	1.09926e-05	0.00901759	CELF2	143.871	1.19296	6.07e-05	TRUE	FALSE	TRUE	FALSE	BosSINE3	+	5
ctg13-17259479-17259684	89.0557	94.5021	82.3526	12.1495	0.0024763	0.0430208	PFKFB3	6855.78	1.02854	0.0417902	TRUE	TRUE	FALSE	FALSE	BosSINE3	-	3
ctg13-17298900-17299014	86.9007	94.4145	77.7999	16.6146	5.9973e-05	0.011619	PFKFB3	6855.78	1.02854	0.0417902	TRUE	FALSE	TRUE	FALSE	BosSINE3	+	10
ctg13-17325243-17325414	27.6259	16.3675	41.4823	-25.1148	0.00038477	0.0194558	PFKFB3	6855.78	1.02854	0.0417902	TRUE	FALSE	TRUE	FALSE	BosSINE3	+	5
ctg13-17326549-17326634	19.3201	7.52292	33.8397	-26.3168	0.000486604	0.0212516	PFKFB3	6855.78	1.02854	0.0417902	TRUE	FALSE	TRUE	FALSE	BosSINE2	-	3
ctg13-17453769-17453990	84.075	92.4027	73.9218	18.4809	0.000708506	0.0243847	IL2RA	595.383	1.82953	0.000273841	TRUE	FALSE	FALSE	TRUE	BosSINE2	+	4
ctg13-17472316-17472532	84.9466	95.949	71.4051	24.5438	0.000147279	0.0148443	IL2RA	595.383	1.82953	0.000273841	TRUE	FALSE	TRUE	FALSE	BosSINE2	+	3
ctg13-17525173-17525375	58.0234	49.7469	69.0299	-19.283	0.0021373	0.0396247	IL15RA	175.299	1.80763	0.00074251	TRUE	FALSE	TRUE	FALSE	BosSINE3	+	3
ctg13-20306642-20306916	85.1411	90.705	78.2391	12.4658	0.00178879	0.0363949	CCDC7	11.7109	-1.99266	0.00969656	TRUE	FALSE	FALSE	TRUE	BosSINEL	-	8
ctg13-25065918-25066183	73.7894	86.2896	58.2622	28.0274	0.000250236	0.0167908	LOC104973739	5.85233	-3.5709	0.00739038	TRUE	TRUE	FALSE	FALSE	BosSINEL	-	10
ctg13-25070829-25070957	76.4143	91.4875	57.3749	34.1126	1.09926e-05	0.00901759	LOC104973739	5.85233	-3.5709	0.00739038	TRUE	TRUE	FALSE	FALSE	BosSINE3	-	3
ctg13-25155114-25155329	72.0547	81.4518	60.7958	20.6559	0.000707298	0.0243453	KIAA1217	203.586	-3.32301	6.49e-06	TRUE	FALSE	TRUE	FALSE	BosSINE3	-	6
ctg13-25208868-25209142	81.4637	87.4999	75.2682	12.2317	0.000580014	0.0224556	KIAA1217	203.586	-3.32301	6.49e-06	TRUE	FALSE	TRUE	FALSE	BosSINEL	+	9
ctg13-25237129-25237265	87.6142	94.1867	79.525	14.6617	0.00100411	0.0285926	KIAA1217	203.586	-3.32301	6.49e-06	TRUE	FALSE	TRUE	FALSE	BosSINEL	-	4
ctg13-25325698-25325880	86.4539	91.091	80.7318	10.3592	0.00178879	0.0363949	KIAA1217	203.586	-3.32301	6.49e-06	TRUE	FALSE	TRUE	FALSE	BosSINE3	-	5
ctg13-35314231-35314457	90.6817	96.4788	83.5842	12.8946	5.99431e-05	0.011619	MAP3K8	3795.88	1.92147	7.42e-05	TRUE	FALSE	TRUE	FALSE	BosSINE2	+	5
ctg13-35401213-35401475	81.5789	87.5133	74.275	13.2383	0.00124915	0.0309714	LOC101903449	17.5556	3.17514	8.41e-05	TRUE	FALSE	TRUE	FALSE	BosSINEL	-	4
ctg13-37003497-37003693	81.8299	92.7104	68.4385	24.272	0.00156854	0.0348971	RAB18	1764.21	-1.24017	0.0286208	TRUE	FALSE	TRUE	FALSE	BosSINE1	-	3
ctg13-37024307-37024500	79.5443	88.0396	69.0885	18.9511	0.000311152	0.0180281	RAB18	1764.21	-1.24017	0.0286208	TRUE	FALSE	TRUE	FALSE	BosSINE2	-	3
ctg13-38553819-38553938	77.6812	82.2883	72.0649	10.2234	0.00147813	0.0334817	RBBP9	68.3338	-1.19159	0.000129848	TRUE	FALSE	TRUE	FALSE	BosSINEL	-	4
ctg13-39343130-39343400	85.7441	92.1315	77.8056	14.3259	0.00103778	0.0285926	LOC101905154	5.64813	-2.62257	0.00434169	TRUE	TRUE	FALSE	FALSE	BosSINEL	-	7
ctg13-39358407-39358626	78.0319	89.1998	64.6487	24.5511	0.000473624	0.0209513	LOC101905154	5.64813	-2.62257	0.00434169	TRUE	FALSE	TRUE	FALSE	BosSINE2	-	3
ctg13-53335147-53335358	79.0394	91.6421	64.1708	27.4714	1.49417e-05	0.0093863	LOC101902869	24.1691	1.7553	0.00385076	TRUE	FALSE	TRUE	FALSE	BosSINE2	-	5
ctg13-61244278-61244535	56.4243	65.2068	45.6542	19.5526	0.000200254	0.0158399	LOC107133075	20.0308	1.51862	0.0443522	TRUE	TRUE	FALSE	FALSE	BosSINEL	+	11
ctg13-61258905-61259170	79.6082	94.0672	61.959	32.1083	3.52765e-05	0.0107934	BCL2L1	1225.68	1.03341	0.00810104	TRUE	FALSE	TRUE	FALSE	BosSINEL	-	9
ctg13-61271863-61271929	77.8259	83.3635	71.0103	12.3533	0.00149782	0.0334817	BCL2L1	1225.68	1.03341	0.00810104	TRUE	FALSE	FALSE	TRUE	BosSINEL	-	3
ctg13-61561669-61561856	62.7702	72.9384	50.2555	22.6829	0.000473624	0.0209513	HCK	3131.06	2.21154	0.000245308	TRUE	FALSE	FALSE	TRUE	BosSINE3	+	7
ctg13-62218637-62218759	89.7151	96.9316	81.1026	15.829	0.000286946	0.0180281	EFCAB8	87.243	1.04062	0.0016387	TRUE	FALSE	TRUE	FALSE	BosSINE6	-	3
ctg13-64188674-64188943	81.4155	89.1719	71.4044	17.7675	0.000858483	0.026256	ACSS2	1578.66	-3.31762	2.19e-05	TRUE	FALSE	TRUE	FALSE	BosSINEL	+	5
ctg13-64189980-64190247	89.8359	95.237	83.1885	12.0485	1.49417e-05	0.0093863	ACSS2	1578.66	-3.31762	2.19e-05	TRUE	FALSE	TRUE	FALSE	BosSINEL	-	6
ctg13-64202403-64202677	86.473	94.1493	77.016	17.1333	0.00103778	0.0285926	ACSS2	1578.66	-3.31762	2.19e-05	TRUE	FALSE	TRUE	FALSE	BosSINEL	+	7
ctg13-64244372-64244500	77.8907	90.7906	62.0138	28.7768	0.000580014	0.0224556	GSS	217.28	-1.21741	0.00110587	TRUE	FALSE	TRUE	FALSE	BosSINEL	-	5
ctg13-64492376-64492598	77.0989	85.2655	67.2194	18.046	0.00126597	0.0309714	MMP24	1.98392	-2.50506	0.031914	TRUE	FALSE	TRUE	FALSE	BosSINE3	+	3
ctg13-64532167-64532348	88.7006	93.7161	82.6298	11.0863	0.000580014	0.0224556	MMP24	1.98392	-2.50506	0.031914	TRUE	FALSE	TRUE	FALSE	BosSINE3	-	4
ctg13-65238308-65238534	80.8571	92.6294	66.4667	26.1627	5.9973e-05	0.011619	EPB41L1	129.285	-2.77647	0.000100719	TRUE	FALSE	TRUE	FALSE	BosSINE2	-	6
ctg13-65239904-65240032	71.0474	84.6133	54.3738	30.2396	0.000556538	0.0224556	EPB41L1	129.285	-2.77647	0.000100719	TRUE	FALSE	TRUE	FALSE	BosSINE6	-	3
ctg13-65246819-65247094	78.2128	89.196	64.8494	24.3466	0.00124915	0.0309714	EPB41L1	129.285	-2.77647	0.000100719	TRUE	FALSE	TRUE	FALSE	BosSINEL	-	11
ctg13-65248781-65249197	83.6187	93.4003	72.0532	21.3472	0.0013664	0.0331412	EPB41L1	129.285	-2.77647	0.000100719	TRUE	FALSE	TRUE	FALSE	BosSINEL	-	6
ctg13-65251269-65251381	75.6856	90.4	57.5756	32.8244	0.000707298	0.0243453	EPB41L1	129.285	-2.77647	0.000100719	TRUE	FALSE	TRUE	FALSE	BosSINE6	-	3
ctg13-65274148-65274261	80.8135	90.7883	69.1996	21.5887	0.00124915	0.0309714	EPB41L1	129.285	-2.77647	0.000100719	TRUE	FALSE	TRUE	FALSE	BosSINE6	+	3
ctg13-65309022-65309130	82.1529	90.8728	71.5537	19.3191	0.00286031	0.0468558	EPB41L1	129.285	-2.77647	0.000100719	TRUE	FALSE	TRUE	FALSE	BosSINE6	-	4
ctg13-65314300-65314400	77.4809	82.8199	71.1256	11.6942	0.00298141	0.0468558	EPB41L1	129.285	-2.77647	0.000100719	TRUE	FALSE	TRUE	FALSE	BosSINE1	-	3
ctg13-6642897-6643111	75.5247	81.6656	67.9667	13.699	0.00126597	0.0309714	SPTLC3	322.115	-4.26542	3.54e-05	TRUE	FALSE	TRUE	FALSE	BosSINE3	-	3
ctg13-6739780-6739904	50.1903	55.5986	43.7546	11.8439	0.000414629	0.0205211	SPTLC3	322.115	-4.26542	3.54e-05	TRUE	FALSE	TRUE	FALSE	BosSINE3	+	4
ctg13-6847186-6847345	71.6101	80.3582	60.7021	19.6561	0.000707298	0.0243453	ISM1	6.34896	-3.82112	0.00871527	TRUE	TRUE	FALSE	FALSE	BosSINE2	+	13
ctg13-71291579-71291841	78.2328	85.1183	69.8689	15.2494	0.000473624	0.0209513	PTPRT	39.2904	-2.13135	0.0438496	TRUE	FALSE	TRUE	FALSE	BosSINEL	-	8
ctg13-71651023-71651138	79.7013	88.6158	69.1718	19.444	0.000488955	0.0212516	PTPRT	39.2904	-2.13135	0.0438496	TRUE	FALSE	TRUE	FALSE	BosSINE6	+	3
ctg13-71846668-71846895	83.0189	90.3938	73.6086	16.7852	0.000580014	0.0224556	PTPRT	39.2904	-2.13135	0.0438496	TRUE	FALSE	TRUE	FALSE	BosSINE2	+	9
ctg13-73321374-73321498	77.2824	85.5708	66.3942	19.1767	0.000540337	0.0224556	PABPC1L	8.0118	1.39482	0.0158927	TRUE	TRUE	FALSE	FALSE	BosSINE6	+	5
ctg13-74631771-74631991	92.7419	97.2073	87.1891	10.0182	0.00204911	0.0396247	ZSWIM3	25.7643	-1.84174	0.0016028	TRUE	FALSE	TRUE	FALSE	BosSINE2	-	3
ctg13-75243883-75244102	84.1027	88.5275	78.3161	10.2114	0.00178879	0.0363949	OCSTAMP	800.123	2.10388	0.0038755	TRUE	FALSE	TRUE	FALSE	BosSINE2	-	5
ctg13-75244928-75245148	55.1502	45.45	67.6613	-22.2113	0.00252352	0.0430208	OCSTAMP	800.123	2.10388	0.0038755	TRUE	FALSE	TRUE	FALSE	BosSINE3	+	5
ctg13-76167644-76167792	86.6816	93.5496	77.9987	15.551	0.000126017	0.013894	SULF2	479.577	-1.33378	0.0335769	TRUE	FALSE	TRUE	FALSE	BosSINE5	+	6
ctg13-76917905-76917958	72.7319	84.7653	57.797	26.9683	0.000200254	0.0158399	PREX1	8980.84	1.54889	0.000377678	TRUE	FALSE	TRUE	FALSE	BosSINE6	+	4
ctg13-76962077-76962202	38.7249	27.2972	52.9049	-25.6078	0.000250089	0.0167908	LOC112449342	114.463	2.62265	0.000968305	TRUE	TRUE	FALSE	FALSE	BosSINE6	+	3
ctg13-76987384-76987585	85.9073	95.6643	73.7189	21.9453	0.0021157	0.0396247	PREX1	8980.84	1.54889	0.000377678	TRUE	FALSE	TRUE	FALSE	BosSINE2	-	6
ctg13-77500230-77500426	72.2284	84.2734	57.1352	27.1382	0.000473624	0.0209513	KCNB1	21.5421	-1.79358	0.0292471	TRUE	FALSE	TRUE	FALSE	BosSINE3	-	8
ctg13-77514327-77514531	78.0349	91.6462	60.4776	31.1686	5.9973e-05	0.011619	LOC101906754	10.6209	-1.59567	0.00999595	TRUE	TRUE	FALSE	FALSE	BosSINE3	+	5
ctg13-77544752-77544979	59.2344	68.3219	47.4967	20.8252	0.00212864	0.0396247	KCNB1	21.5421	-1.79358	0.0292471	TRUE	FALSE	TRUE	FALSE	BosSINE2	+	6
ctg13-77550389-77550560	83.518	88.3386	77.494	10.8446	0.0012514	0.0309714	KCNB1	21.5421	-1.79358	0.0292471	TRUE	FALSE	TRUE	FALSE	BosSINE1	-	4
ctg13-78360865-78361137	67.8196	79.7523	53.605	26.1472	9.90217e-05	0.0132745	LOC112449348	7.30492	3.06759	0.00417453	TRUE	FALSE	TRUE	FALSE	BosSINEL	+	10
ctg13-78620911-78621126	86.0708	92.849	77.8177	15.0313	0.00038477	0.0194558	RIPOR3	3.84963	-2.96039	0.00140917	TRUE	FALSE	TRUE	FALSE	BosSINE3	-	5
ctg13-78672213-78672435	52.1126	40.9688	65.8282	-24.8595	0.00252352	0.0430208	RIPOR3	3.84963	-2.96039	0.00140917	TRUE	FALSE	TRUE	FALSE	BosSINE2	+	3
ctg13-78712473-78712654	78.0796	91.3899	61.9808	29.4091	0.000858483	0.026256	PARD6B	66.7644	-3.30188	1.35e-05	TRUE	FALSE	TRUE	FALSE	BosSINE3	+	4
ctg13-78712668-78712789	73.6483	87.7531	56.2885	31.4647	0.000707298	0.0243453	PARD6B	66.7644	-3.30188	1.35e-05	TRUE	FALSE	TRUE	FALSE	BosSINEL	-	3
ctg13-81496427-81496544	81.1427	91.9516	67.8394	24.1121	2.67594e-05	0.0103792	BCAS1	15.0732	-5.36731	8.75e-06	TRUE	FALSE	TRUE	FALSE	BosSINE5	-	4
ctg13-81509890-81510075	58.8931	67.1792	48.1855	18.9937	0.000707298	0.0243453	BCAS1	15.0732	-5.36731	8.75e-06	TRUE	FALSE	TRUE	FALSE	BosSINE4	-	3
ctg14-14784234-14784455	79.5044	93.993	61.3667	32.6262	0.00038477	0.0194558	TRIB1	14987.5	2.18968	8.11e-05	TRUE	FALSE	TRUE	FALSE	BosSINE2	+	4
ctg14-14957840-14958040	81.8341	94.2089	66.1852	28.0237	0.00230253	0.0418835	NSMCE2	167.028	1.15529	0.00137019	TRUE	FALSE	TRUE	FALSE	BosSINE3	-	6
ctg14-16235940-16236133	80.994	93.7694	65.8974	27.872	4.62101e-05	0.0113782	KLHL38	4.5348	-1.94473	0.0391561	TRUE	FALSE	TRUE	FALSE	BosSINE3	-	6
ctg14-16592797-16593117	83.343	91.0726	74.8115	16.2611	0.00100411	0.0285926	FAM83A	3.555	-2.3843	0.0493976	TRUE	FALSE	TRUE	FALSE	BosSINE1	+	3
ctg14-16605052-16605319	78.4865	87.1633	68.4	18.7633	0.000473624	0.0209513	FAM83A	3.555	-2.3843	0.0493976	TRUE	FALSE	TRUE	FALSE	BosSINEL	-	5
ctg14-22338088-22338312	87.986	95.777	78.497	17.2801	3.94134e-05	0.0113782	RP1	3.24213	-2.97269	0.0445642	TRUE	FALSE	TRUE	FALSE	BosSINE2	+	3
ctg14-23139663-23139743	20.024	10.7469	32.1053	-21.3585	7.73607e-05	0.0124599	LYN	5193.71	1.42472	0.00388835	TRUE	FALSE	TRUE	FALSE	BosSINE3	-	3
ctg14-23216363-23216601	88.4497	97.6805	76.6774	21.0031	2.59791e-05	0.0103792	LYN	5193.71	1.42472	0.00388835	TRUE	FALSE	TRUE	FALSE	BosSINE2	+	4
ctg14-24358190-24358398	87.1148	93.3705	79.5154	13.8551	0.00298141	0.0468558	FAM110B	7.43863	-1.93443	0.00137743	TRUE	FALSE	TRUE	FALSE	BosSINE2	+	6
ctg14-25984736-25984900	83.3373	91.2197	73.6937	17.526	0.000176916	0.0158399	CA8	150.311	-3.18195	0.000258076	TRUE	FALSE	TRUE	FALSE	BosSINE1	-	4
ctg14-26010407-26010609	77.722	89.3448	63.0605	26.2843	1.90124e-05	0.0097305	CA8	150.311	-3.18195	0.000258076	TRUE	FALSE	TRUE	FALSE	BosSINE3	-	3
ctg14-30880838-30881122	55.4652	45.6966	68.0227	-22.3261	0.00038477	0.0194558	VCPIP1	2697.71	1.02419	0.000386525	TRUE	FALSE	TRUE	FALSE	BosSINEL	+	10
ctg14-37089294-37089512	46.6584	37.0771	58.9372	-21.8601	0.00224827	0.0414285	UBE2W	1743.7	1.05981	0.005798	TRUE	FALSE	TRUE	FALSE	BosSINE2	+	3
ctg14-37413890-37414110	85.8699	90.8201	79.7293	11.0909	0.000858483	0.026256	LOC112449517	3.55322	2.13638	0.0440058	TRUE	FALSE	TRUE	FALSE	BosSINE3	-	3
ctg14-43928759-43928913	75.2469	80.9819	68.1843	12.7976	0.00103778	0.0285926	ZNF704	125.983	-2.83085	3.03e-06	TRUE	FALSE	TRUE	FALSE	BosSINE3	+	6
ctg14-43954698-43954898	76.6509	86.8328	64.1192	22.7136	0.00149782	0.0334817	ZNF704	125.983	-2.83085	3.03e-06	TRUE	FALSE	TRUE	FALSE	BosSINE2	+	4
ctg14-45014497-45014752	90.2411	94.659	84.5719	10.0871	0.00015926	0.0148443	MAL2	430.657	-2.88998	2.15e-05	TRUE	FALSE	TRUE	FALSE	BosSINEL	+	4
ctg14-45021100-45021366	79.9336	88.3391	69.5885	18.7506	0.000580014	0.0224556	MAL2	430.657	-2.88998	2.15e-05	TRUE	FALSE	FALSE	TRUE	BosSINEL	+	6
ctg14-45268807-45269007	39.5423	33.7906	46.6214	-12.8307	0.00124915	0.0309714	COLEC10	2.62231	-3.37016	0.0234503	TRUE	FALSE	TRUE	FALSE	BosSINEL	+	9
ctg14-45906146-45906239	84.6029	91.8406	75.6949	16.1458	0.000250236	0.0167908	SAMD12	267.807	-3.55859	0.000103635	TRUE	FALSE	TRUE	FALSE	BosSINE2	+	3
ctg14-45961168-45961366	80.3781	89.587	69.0502	20.5368	0.000793191	0.026256	SAMD12	267.807	-3.55859	0.000103635	TRUE	FALSE	TRUE	FALSE	BosSINE3	+	6
ctg14-54733588-54733749	75.3741	82.2314	67.2141	15.0173	0.00147414	0.0334817	SYBU	8.80755	-2.61944	0.00563918	TRUE	FALSE	TRUE	FALSE	BosSINE3	+	3
ctg14-54795021-54795232	72.4766	80.9104	61.8528	19.0576	0.000707298	0.0243453	SYBU	8.80755	-2.61944	0.00563918	TRUE	FALSE	TRUE	FALSE	BosSINE3	+	4
ctg14-54828238-54828416	79.5697	87.621	69.7833	17.8376	0.00212864	0.0396247	SYBU	8.80755	-2.61944	0.00563918	TRUE	FALSE	TRUE	FALSE	BosSINE4	+	3
ctg14-60269369-60269642	79.1605	84.0713	73.886	10.1854	0.00252352	0.0430208	DCSTAMP	673.972	1.17488	0.0241901	TRUE	FALSE	TRUE	FALSE	BosSINEL	-	12
ctg14-60276412-60276677	83.3124	90.0115	74.4131	15.5984	0.00298141	0.0468558	DCSTAMP	673.972	1.17488	0.0241901	TRUE	TRUE	FALSE	FALSE	BosSINEL	+	8
ctg14-60509638-60509772	90.1305	95.4644	83.7239	11.7405	0.00141899	0.0334817	RIMS2	7.89029	-3.60774	0.00167929	TRUE	FALSE	TRUE	FALSE	BosSINE2	+	3
ctg14-60577432-60577665	84.396	90.6115	76.7462	13.8653	0.000200254	0.0158399	RIMS2	7.89029	-3.60774	0.00167929	TRUE	FALSE	TRUE	FALSE	BosSINE2	-	3
ctg14-60608476-60608607	88.4242	93.497	82.488	11.009	0.000853379	0.026256	RIMS2	7.89029	-3.60774	0.00167929	TRUE	FALSE	TRUE	FALSE	BosSINEL	-	6
ctg14-60746644-60746843	76.5	84.6531	66.4654	18.1877	0.00212864	0.0396247	RIMS2	7.89029	-3.60774	0.00167929	TRUE	FALSE	TRUE	FALSE	BosSINE3	+	4
ctg14-60780603-60780807	84.0965	88.8981	78.3359	10.5622	0.000250236	0.0167908	RIMS2	7.89029	-3.60774	0.00167929	TRUE	FALSE	TRUE	FALSE	BosSINE3	-	3
ctg14-60939555-60939834	85.2885	92.1054	76.977	15.1284	5.9973e-05	0.011619	RIMS2	7.89029	-3.60774	0.00167929	TRUE	FALSE	TRUE	FALSE	BosSINEL	+	6
ctg14-62778626-62778753	66.4095	80.6741	50.3731	30.301	0.00178879	0.0363949	GRHL2	59.7739	-3.90946	1.17e-06	TRUE	FALSE	TRUE	FALSE	BosSINEL	-	6
ctg14-62778631-62778768	66.4095	80.6741	50.3731	30.301	0.00178879	0.0363949	GRHL2	59.7739	-3.90946	1.17e-06	TRUE	FALSE	TRUE	FALSE	BosSINE2	-	6
ctg14-62874003-62874196	76.6307	86.6414	64.4846	22.1568	0.000707298	0.0243453	GRHL2	59.7739	-3.90946	1.17e-06	TRUE	FALSE	TRUE	FALSE	BosSINE3	+	3
ctg14-62875299-62875518	80.4608	89.1484	69.7683	19.3802	0.000707298	0.0243453	GRHL2	59.7739	-3.90946	1.17e-06	TRUE	FALSE	TRUE	FALSE	BosSINE3	-	4
ctg14-62883025-62883300	73.5156	86.8179	58.96	27.8579	9.90217e-05	0.0132745	GRHL2	59.7739	-3.90946	1.17e-06	TRUE	FALSE	TRUE	FALSE	BosSINEL	-	11
ctg14-65069615-65069800	85.4534	96.7877	71.8271	24.9606	0.000401153	0.0202233	VPS13B	4891.47	1.33217	3.38e-05	TRUE	FALSE	TRUE	FALSE	BosSINE1	+	4
ctg14-65087441-65087709	86.2028	92.7145	78.0776	14.6369	0.00198806	0.0394187	VPS13B	4891.47	1.33217	3.38e-05	TRUE	FALSE	TRUE	FALSE	BosSINEL	-	8
ctg14-65962719-65962939	84.2463	95.2438	70.8342	24.4097	0.000580014	0.0224556	NIPAL2	522.643	-3.68536	9.37e-05	TRUE	FALSE	TRUE	FALSE	BosSINE3	-	5
ctg14-66336526-66336605	81.567	94.6194	65.6278	28.9916	0.000778136	0.026256	MATN2	5.18344	-2.53298	0.0269543	TRUE	FALSE	TRUE	FALSE	BosSINE3	+	3
ctg14-67136425-67136698	83.9032	88.4449	78.3135	10.1315	0.00124915	0.0309714	CPQ	4.69387	-3.30617	0.0163922	TRUE	FALSE	TRUE	FALSE	BosSINEL	+	8
ctg14-67286423-67286532	83.6856	89.1549	77.2235	11.9313	0.000200254	0.0158399	CPQ	4.69387	-3.30617	0.0163922	TRUE	FALSE	TRUE	FALSE	BosSINEL	+	7
ctg14-67630563-67630771	83.7966	90.4201	75.6445	14.7756	0.00212864	0.0396247	SDC2	395.744	-5.74683	2.11e-07	TRUE	FALSE	TRUE	FALSE	BosSINE2	+	7
ctg14-69658469-69658666	33.2951	38.8446	26.4648	12.3798	0.00178879	0.0363949	ESRP1	208.317	-3.42283	3.37e-05	TRUE	FALSE	TRUE	FALSE	BosSINE3	+	7
ctg14-7688205-7688402	84.0571	89.0411	77.9513	11.0898	0.0021373	0.0396247	LOC107133100	12.5244	-2.01298	0.0402785	TRUE	FALSE	TRUE	FALSE	BosSINE2	+	3
ctg14-81901103-81901285	91.3912	96.4652	85.2324	11.2328	0.00198042	0.0394187	SNTB1	590.241	-1.97694	0.00375417	TRUE	FALSE	TRUE	FALSE	BosSINE2	+	7
ctg14-81903036-81903116	87.2225	95.7437	76.3764	19.3673	0.000467736	0.0209513	SNTB1	590.241	-1.97694	0.00375417	TRUE	FALSE	TRUE	FALSE	BosSINE3	+	5
ctg14-82016574-82016783	80.4545	91.9868	67.3864	24.6004	0.000250236	0.0167908	SNTB1	590.241	-1.97694	0.00375417	TRUE	FALSE	TRUE	FALSE	BosSINE2	-	8
ctg14-82018596-82018823	88.5732	95.5433	79.8411	15.7023	0.000126017	0.013894	SNTB1	590.241	-1.97694	0.00375417	TRUE	FALSE	TRUE	FALSE	BosSINE2	+	11
ctg14-82026823-82027024	19.3303	11.2159	29.0852	-17.8692	0.00149782	0.0334817	SNTB1	590.241	-1.97694	0.00375417	TRUE	FALSE	TRUE	FALSE	BosSINE3	-	7
ctg14-82032247-82032371	80.4239	89.8	68.884	20.916	0.000858483	0.026256	SNTB1	590.241	-1.97694	0.00375417	TRUE	FALSE	TRUE	FALSE	BosSINE6	-	6
ctg14-82058447-82058572	83.3533	94.6782	70.0677	24.6105	0.000296023	0.0180281	SNTB1	590.241	-1.97694	0.00375417	TRUE	FALSE	TRUE	FALSE	BosSINE6	+	5
ctg14-82100194-82100415	83.8819	91.8347	74.4079	17.4267	4.62101e-05	0.0113782	SNTB1	590.241	-1.97694	0.00375417	TRUE	FALSE	TRUE	FALSE	BosSINE3	-	3
ctg14-82114159-82114369	78.3184	84.5302	70.9038	13.6264	0.00252352	0.0430208	SNTB1	590.241	-1.97694	0.00375417	TRUE	FALSE	TRUE	FALSE	BosSINE3	+	4
ctg14-8270041-8270256	16.0504	4.60514	32.027	-27.4219	0.00105466	0.0290366	TG	391.005	1.90261	0.000365034	TRUE	FALSE	TRUE	FALSE	BosSINE3	+	3
ctg14-8373912-8374136	89.5844	94.2634	83.8864	10.377	0.00260089	0.0442301	TG	391.005	1.90261	0.000365034	TRUE	FALSE	TRUE	FALSE	BosSINE2	-	4
ctg14-8415567-8415788	86.5346	95.2011	76.1454	19.0557	0.000350963	0.0194558	TG	391.005	1.90261	0.000365034	TRUE	FALSE	TRUE	FALSE	BosSINE3	+	5
ctg15-13901292-13901361	85.7442	95.1938	74.559	20.6348	0.00277563	0.0464498	MAML2	2473.18	1.77288	0.000218498	TRUE	FALSE	TRUE	FALSE	BosSINEL	+	3
ctg15-14057429-14057686	79.0587	87.6123	68.6197	18.9926	4.62101e-05	0.0113782	MAML2	2473.18	1.77288	0.000218498	TRUE	FALSE	TRUE	FALSE	BosSINEL	-	9
ctg15-14093432-14093648	90.4647	96.6308	82.8957	13.7351	0.000200254	0.0158399	MAML2	2473.18	1.77288	0.000218498	TRUE	TRUE	FALSE	FALSE	BosSINE2	+	9
ctg15-14101709-14101982	87.888	95.1138	78.9048	16.209	0.000311152	0.0180281	MAML2	2473.18	1.77288	0.000218498	TRUE	TRUE	FALSE	FALSE	BosSINEL	+	5
ctg15-14133055-14133254	73.4657	79.7806	65.9467	13.8339	0.00171346	0.0363949	MAML2	2473.18	1.77288	0.000218498	TRUE	TRUE	FALSE	FALSE	BosSINE3	+	7
ctg15-15599822-15600044	85.0567	93.2559	75.368	17.888	3.52765e-05	0.0107934	AMOTL1	130.535	-2.84507	1.03e-05	TRUE	FALSE	TRUE	FALSE	BosSINE2	+	7
ctg15-22251963-22252082	87.6978	96.1613	77.1061	19.0552	0.00186895	0.0376271	C15H11orf52	8.15675	-2.62548	0.0124997	TRUE	FALSE	TRUE	FALSE	BosSINE6	-	3
ctg15-28527765-28527969	86.6333	92.041	80.009	12.0321	7.73607e-05	0.0124599	FXYD6	297.917	-1.24765	0.0279381	TRUE	FALSE	TRUE	FALSE	BosSINE2	-	3
ctg15-28528528-28528820	88.5525	94.737	80.8348	13.9022	4.62101e-05	0.0113782	FXYD6	297.917	-1.24765	0.0279381	TRUE	TRUE	TRUE	FALSE	BosSINEL	-	8
ctg15-28781835-28782038	85.7433	92.6129	77.3521	15.2607	2.67594e-05	0.0103792	TMPRSS4	30.3454	-3.5176	0.00399942	TRUE	FALSE	TRUE	FALSE	BosSINE2	-	8
ctg15-28859702-28859977	59.7274	65.7343	52.0977	13.6366	0.000580014	0.0224556	SCN2B	148.18	2.59082	0.00137019	TRUE	FALSE	TRUE	FALSE	BosSINEL	-	10
ctg15-28951511-28951680	84.893	93.6256	73.8477	19.7779	0.000126017	0.013894	MPZL2	45.4669	-2.00244	0.00506042	TRUE	FALSE	TRUE	FALSE	BosSINE4	+	5
ctg15-29218731-29218898	54.7124	60.8571	47.333	13.5241	0.00298141	0.0468558	IFT46	58.9671	-1.3001	0.02312	TRUE	FALSE	TRUE	FALSE	BosSINE3	+	6
ctg15-30696133-30696327	68.7723	83.0052	51.4301	31.5751	7.73607e-05	0.0124599	TRIM29	92.2702	-2.3381	0.00322099	TRUE	FALSE	TRUE	FALSE	BosSINE3	+	4
ctg15-31146195-31146401	78.6004	85.6515	70.4782	15.1732	0.00212864	0.0396247	GRIK4	4.30319	-3.63135	0.0247922	TRUE	FALSE	TRUE	FALSE	BosSINE2	-	4
ctg15-31194484-31194758	67.4926	72.7439	60.9313	11.8126	8.01604e-06	0.00881238	GRIK4	4.30319	-3.63135	0.0247922	TRUE	FALSE	TRUE	FALSE	BosSINEL	-	7
ctg15-31250902-31251124	74.8012	80.6397	67.7128	12.9269	0.00103778	0.0285926	GRIK4	4.30319	-3.63135	0.0247922	TRUE	FALSE	TRUE	FALSE	BosSINE2	-	3
ctg15-32085018-32085215	88.2077	94.1357	80.8965	13.2392	0.000707298	0.0243453	SORL1	7923.71	1.59916	0.000371588	TRUE	FALSE	TRUE	FALSE	BosSINE3	-	4
ctg15-32113836-32114018	44.5711	31.1155	61.5423	-30.4268	0.000858483	0.026256	SORL1	7923.71	1.59916	0.000371588	TRUE	FALSE	TRUE	FALSE	BosSINE4	+	3
ctg15-32114720-32114893	53.8172	48.8883	59.8837	-10.9954	0.00212864	0.0396247	SORL1	7923.71	1.59916	0.000371588	TRUE	FALSE	TRUE	FALSE	BosSINEL	+	4
ctg15-33472714-33472823	39.2517	30.6354	49.9387	-19.3033	3.52765e-05	0.0107934	CRTAM	155.988	-2.25046	0.00941065	TRUE	FALSE	TRUE	FALSE	BosSINE2	+	6
ctg15-35449921-35450187	76.1361	86.1969	63.3254	22.8715	0.000200254	0.0158399	PLEKHA7	29.0767	-2.75416	0.000220541	TRUE	FALSE	TRUE	FALSE	BosSINEL	-	4
ctg15-35535987-35536195	79.261	93.2606	62.0308	31.2299	0.000250236	0.0167908	PLEKHA7	29.0767	-2.75416	0.000220541	TRUE	FALSE	TRUE	FALSE	BosSINE2	+	5
ctg15-35571808-35571868	89.1272	97.5172	79.1008	18.4164	0.00124926	0.0309714	PLEKHA7	29.0767	-2.75416	0.000220541	TRUE	FALSE	TRUE	FALSE	BosSINE3	+	5
ctg15-35606478-35606690	84.3809	94.4296	72.4632	21.9664	0.00103778	0.0285926	PLEKHA7	29.0767	-2.75416	0.000220541	TRUE	FALSE	TRUE	FALSE	BosSINE3	-	5
ctg15-40001667-40001872	86.8402	92.4002	79.5428	12.8574	0.000580014	0.0224556	TEAD1	554.037	-3.59716	1.49e-05	TRUE	FALSE	TRUE	FALSE	BosSINE3	-	4
ctg15-44001146-44001359	30.4183	21.251	41.8829	-20.6319	0.000200254	0.0158399	STK33	2.69743	-2.25468	0.0262599	TRUE	FALSE	TRUE	FALSE	BosSINE3	+	3
ctg15-45090716-45090928	88.7019	96.1865	79.099	17.0874	0.000192688	0.0158399	PPFIBP2	115.003	-1.60416	0.000370477	TRUE	FALSE	TRUE	FALSE	BosSINE3	-	3
ctg15-45208984-45209154	61.0559	55.9818	67.3127	-11.3309	0.000793191	0.026256	PPFIBP2	115.003	-1.60416	0.000370477	TRUE	FALSE	TRUE	FALSE	BosSINEL	+	6
ctg15-46363404-46363606	77.9	85.9437	69.0768	16.867	0.00268785	0.0450824	LOC783920	1161.06	1.49953	0.000922245	TRUE	TRUE	FALSE	FALSE	BosSINE3	+	3
ctg15-51782202-51782330	85.1298	95.3822	73.3	22.0822	0.00218265	0.040347	FOLR3	110.046	-4.37065	0.00158932	TRUE	FALSE	FALSE	TRUE	BosSINE6	-	3
ctg15-51785946-51786170	80.3115	92.1167	65.7821	26.3346	0.000350963	0.0194558	FOLR3	110.046	-4.37065	0.00158932	TRUE	FALSE	TRUE	FALSE	BosSINE2	-	3
ctg15-52307638-52307911	82.4961	89.8618	73.5692	16.2926	0.00124915	0.0309714	STARD10	25.2548	-1.92591	0.0150752	TRUE	FALSE	TRUE	FALSE	BosSINEL	-	7
ctg15-52328510-52328781	87.327	92.2159	81.566	10.6498	0.000580014	0.0224556	STARD10	25.2548	-1.92591	0.0150752	TRUE	FALSE	TRUE	FALSE	BosSINEL	-	7
ctg15-52824537-52824753	89.2525	95.3067	81.6299	13.6768	0.000350963	0.0194558	ARHGEF17	65.9912	-1.0293	0.00147269	TRUE	FALSE	TRUE	FALSE	BosSINE2	+	5
ctg15-53123423-53123637	87.3941	93.2011	79.961	13.2401	0.000858483	0.026256	PLEKHB1	25.3261	-2.23401	0.00876336	TRUE	FALSE	TRUE	FALSE	BosSINE2	-	5
ctg15-53125884-53126145	68.9006	63.0797	76.0549	-12.9752	0.00252352	0.0430208	PLEKHB1	25.3261	-2.23401	0.00876336	TRUE	FALSE	TRUE	FALSE	BosSINEL	-	7
ctg15-55190896-55191101	86.7296	92.7149	79.5066	13.2083	0.00015926	0.0148443	DGAT2	2503.21	3.07609	0.000123047	TRUE	FALSE	TRUE	FALSE	BosSINE3	-	3
ctg15-58131202-58131474	86.7793	91.6241	80.8165	10.8076	0.000473624	0.0209513	LGR4	95.1668	-3.49836	0.000100719	TRUE	FALSE	TRUE	FALSE	BosSINEL	+	7
ctg15-58155054-58155279	80.4363	85.8042	73.6992	12.105	0.000858483	0.026256	LGR4	95.1668	-3.49836	0.000100719	TRUE	FALSE	TRUE	FALSE	BosSINE3	+	4
ctg15-6409193-6409467	71.4074	85.5828	53.5631	32.0197	0.000707298	0.0243453	BIRC3	16272.6	2.11529	4.19e-05	TRUE	FALSE	TRUE	FALSE	BosSINEL	-	5
ctg15-64822114-64822251	22.9024	6.53498	41.5521	-35.0171	0.000167451	0.0155172	ABTB2	782.487	1.13565	0.0384436	TRUE	FALSE	TRUE	FALSE	BosSINE6	-	3
ctg15-65021284-65021497	87.1639	93.1827	79.9346	13.2481	0.00103778	0.0285926	ELF5	5075.41	-5.20331	3.57e-07	TRUE	FALSE	TRUE	FALSE	BosSINE2	-	7
ctg15-65030445-65030668	89.8879	96.1794	82.1446	14.0348	5.99431e-05	0.011619	ELF5	5075.41	-5.20331	3.57e-07	TRUE	FALSE	TRUE	FALSE	BosSINE2	+	5
ctg15-65041430-65041650	81.0144	90.576	69.2462	21.3299	0.00038477	0.0194558	ELF5	5075.41	-5.20331	3.57e-07	TRUE	FALSE	TRUE	FALSE	BosSINE2	-	3
ctg15-65041849-65042059	82.7523	92.2719	71.0359	21.236	0.000322675	0.0185482	ELF5	5075.41	-5.20331	3.57e-07	TRUE	FALSE	TRUE	FALSE	BosSINE1	-	3
ctg15-65049280-65049456	76.3126	90.5521	58.7872	31.7649	0.000200254	0.0158399	ELF5	5075.41	-5.20331	3.57e-07	TRUE	FALSE	TRUE	FALSE	BosSINE4	+	3
ctg15-65200008-65200164	82.9614	93.6556	69.9603	23.6953	5.74679e-06	0.00881238	EHF	2357.8	-3.75051	1.3e-05	TRUE	FALSE	TRUE	FALSE	BosSINE2	+	3
ctg15-65202467-65202739	84.1911	95.4475	70.7554	24.6921	7.73607e-05	0.0124599	EHF	2357.8	-3.75051	1.3e-05	TRUE	FALSE	TRUE	FALSE	BosSINEL	-	5
ctg15-65204581-65204715	79.1505	86.2045	70.5638	15.6407	0.00103778	0.0285926	EHF	2357.8	-3.75051	1.3e-05	TRUE	FALSE	TRUE	FALSE	BosSINEL	-	5
ctg15-65823930-65824140	90.5518	97.0162	82.2558	14.7604	0.00169099	0.0363949	SLC1A2	310.373	-2.86302	0.000968305	TRUE	FALSE	TRUE	FALSE	BosSINE2	-	4
ctg15-6584881-6585002	76.0017	92.4472	56.3786	36.0687	0.000291459	0.0180281	YAP1	261.323	-2.77921	4.9e-05	TRUE	FALSE	TRUE	FALSE	BosSINE6	+	4
ctg15-65878729-65878808	76.2492	87.8046	62.2641	25.5405	0.000250236	0.0167908	SLC1A2	310.373	-2.86302	0.000968305	TRUE	FALSE	TRUE	FALSE	BosSINE3	+	3
ctg15-65881360-65881577	83.2391	95.6023	67.4141	28.1882	0.000414629	0.0205211	SLC1A2	310.373	-2.86302	0.000968305	TRUE	FALSE	TRUE	FALSE	BosSINE2	+	4
ctg15-65926846-65927060	84.6004	90.2977	77.5885	12.7092	0.000250236	0.0167908	SLC1A2	310.373	-2.86302	0.000968305	TRUE	FALSE	TRUE	FALSE	BosSINE2	+	4
ctg15-66189597-66189860	90.0141	94.7564	84.4497	10.3067	0.00252352	0.0430208	TRIM44	31.8383	-2.07671	0.0019457	TRUE	FALSE	TRUE	FALSE	BosSINEL	-	13
ctg15-66776691-66776886	87.8284	96.427	77.5346	18.8924	0.000443087	0.0209513	PRR5L	1274.56	1.35257	0.00611909	TRUE	FALSE	TRUE	FALSE	BosSINE3	-	3
ctg15-70646925-70647129	57.306	63.2774	50.4256	12.8518	0.000250236	0.0167908	LRRC4C	7.04824	-2.47005	0.016537	TRUE	FALSE	TRUE	FALSE	BosSINE2	-	3
ctg15-71044210-71044432	66.0611	73.2909	56.6798	16.6111	0.00103778	0.0285926	LRRC4C	7.04824	-2.47005	0.016537	TRUE	FALSE	TRUE	FALSE	BosSINE2	+	3
ctg15-71600631-71600754	70.8316	77.9094	63.1646	14.7448	0.00205697	0.0396247	LRRC4C	7.04824	-2.47005	0.016537	TRUE	FALSE	TRUE	FALSE	BosSINE2	+	3
ctg15-71604241-71604320	59.7448	53.5702	67.229	-13.6587	0.000858483	0.026256	LRRC4C	7.04824	-2.47005	0.016537	TRUE	FALSE	TRUE	FALSE	BosSINE3	-	3
ctg15-71778202-71778505	75.9882	81.5597	69.2878	12.2719	0.00015926	0.0148443	LRRC4C	7.04824	-2.47005	0.016537	TRUE	FALSE	TRUE	FALSE	BosSINE1	+	5
ctg15-74663214-74663332	88.504	95.911	80.1577	15.7533	0.000130497	0.014367	CD82	2220.81	2.01009	9.86e-05	TRUE	FALSE	TRUE	FALSE	BosSINE3	-	3
ctg15-76012375-76012529	89.1679	95.1933	82.2154	12.9779	0.00124226	0.0309714	PHF21A	691.231	1.22643	0.000332487	TRUE	FALSE	TRUE	FALSE	BosSINE6	-	3
ctg15-76094361-76094631	85.7823	91.8893	78.2659	13.6234	0.00103778	0.0285926	PHF21A	691.231	1.22643	0.000332487	TRUE	FALSE	TRUE	FALSE	BosSINEL	+	7
ctg15-77475076-77475345	54.8705	45.6817	65.789	-20.1073	4.62101e-05	0.0113782	AGBL2	45.1289	1.22211	0.0371651	TRUE	FALSE	TRUE	FALSE	BosSINEL	-	7
ctg15-77665473-77665881	65.9194	59.9573	73.2681	-13.3108	0.00252352	0.0430208	LOC104974328	15.3723	2.74678	0.00064863	TRUE	TRUE	FALSE	FALSE	BosSINEL	+	14
ctg15-77719693-77719874	76.1048	92.2847	56.2824	36.0023	0.00169322	0.0363949	PTPRJ	11878	1.74718	0.00032785	TRUE	FALSE	TRUE	FALSE	BosSINE3	+	4
ctg15-77737391-77737509	81.0514	94.8425	64.7795	30.063	0.000722647	0.0248307	PTPRJ	11878	1.74718	0.00032785	TRUE	FALSE	TRUE	FALSE	BosSINE2	-	3
ctg15-77756217-77756271	78.3029	91.3354	62.2628	29.0726	0.00171346	0.0363949	PTPRJ	11878	1.74718	0.00032785	TRUE	FALSE	TRUE	FALSE	BosSINE1	-	3
ctg15-7858737-7858987	75.0754	83.2827	65.2787	18.004	0.000707298	0.0243453	PGR	34.6273	-5.54259	2.78e-07	TRUE	FALSE	TRUE	FALSE	BosSINEL	-	5
ctg15-80524345-80524461	74.2544	88.9839	56.1258	32.8581	5.9973e-05	0.011619	TNKS1BP1	85.8306	-1.54865	0.000475789	TRUE	TRUE	FALSE	FALSE	BosSINE6	+	7
ctg15-80676778-80676981	38.7446	26.8703	53.3591	-26.4888	0.00124915	0.0309714	SLC43A3	80	2.01181	0.0434378	TRUE	FALSE	TRUE	FALSE	BosSINE3	+	8
ctg15-80687921-80688029	20.8617	5.88125	40.514	-34.6327	0.000317216	0.0183486	SLC43A3	80	2.01181	0.0434378	TRUE	FALSE	TRUE	FALSE	BosSINE6	-	4
ctg15-80690419-80690494	30.6448	14.8237	47.9462	-33.1224	0.00313508	0.048485	SLC43A3	80	2.01181	0.0434378	TRUE	FALSE	TRUE	FALSE	BosSINE6	-	5
ctg15-80771333-80771556	79.8647	90.0951	67.8624	22.2327	0.00149782	0.0334817	SLC43A1	62.9915	-3.16639	0.000449254	TRUE	FALSE	TRUE	FALSE	BosSINE2	-	5
ctg15-80822074-80822193	31.1689	15.545	49.9577	-34.4127	0.00178879	0.0363949	UBE2L6	211.565	2.07104	0.00020385	TRUE	FALSE	TRUE	FALSE	BosSINE5	+	8
ctg15-8214956-8215217	70.2258	82.6762	54.2168	28.4594	0.00038477	0.0194558	ARHGAP42	115.81	-2.05181	0.00498815	TRUE	FALSE	TRUE	FALSE	BosSINEL	-	7
ctg15-8286270-8286460	78.7991	89.1466	65.4871	23.6595	9.90217e-05	0.0132745	ARHGAP42	115.81	-2.05181	0.00498815	TRUE	TRUE	FALSE	FALSE	BosSINE3	-	10
ctg15-83196369-83196518	89.2974	95.0531	82.2135	12.8397	0.000249649	0.0167908	MS4A7	66.9804	1.63838	0.015652	TRUE	FALSE	TRUE	FALSE	BosSINE2	-	4
ctg15-83285103-83285201	16.7189	4.45276	31.4967	-27.0439	0.00151653	0.0338576	MS4A1	295.24	2.22901	0.0117054	TRUE	FALSE	TRUE	FALSE	BosSINE6	-	4
ctg15-83287456-83287571	13.5311	3.82917	25.6048	-21.7756	0.000241821	0.0167908	MS4A1	295.24	2.22901	0.0117054	TRUE	FALSE	TRUE	FALSE	BosSINE6	-	3
ctg16-1088751-1088928	82.0011	92.5873	69.25	23.3373	0.00108524	0.0293547	BTG2	4156.58	1.34684	0.011752	TRUE	FALSE	TRUE	FALSE	BosSINE2	+	5
ctg16-1432870-1433061	79.798	90.1629	68.1433	22.0196	0.000858436	0.026256	ATP2B4	1716.6	-1.46121	5.52e-05	TRUE	FALSE	TRUE	FALSE	BosSINE2	-	5
ctg16-1449619-1449812	90.9589	97.1076	83.3912	13.7164	0.00298141	0.0468558	ATP2B4	1716.6	-1.46121	5.52e-05	TRUE	FALSE	TRUE	FALSE	BosSINE3	-	7
ctg16-1888084-1888146	86.4098	92.6177	78.7692	13.8485	0.00306115	0.0476466	SOX13	104.5	-2.39874	0.000797907	TRUE	FALSE	TRUE	FALSE	BosSINE1	-	3
ctg16-18941861-18942045	82.1724	89.8816	72.4827	17.3989	0.00214001	0.0396247	USH2A	3.84444	-3.10458	0.022125	TRUE	FALSE	TRUE	FALSE	BosSINE1	+	3
ctg16-1898350-1898604	90.4982	96.85	83.1692	13.6808	0.00208309	0.0396247	SOX13	104.5	-2.39874	0.000797907	TRUE	FALSE	TRUE	FALSE	BosSINEL	+	3
ctg16-18996259-18996534	79.5365	85.1088	73.0067	12.102	0.000858483	0.026256	USH2A	3.84444	-3.10458	0.022125	TRUE	FALSE	TRUE	FALSE	BosSINEL	-	4
ctg16-1921256-1921530	79.661	86.6324	70.9366	15.6958	7.73607e-05	0.0124599	ETNK2	45.0079	-4.10183	1.21e-05	TRUE	FALSE	TRUE	FALSE	BosSINEL	-	6
ctg16-21817246-21817464	85.131	92.574	75.9551	16.6188	0.000707298	0.0243453	TGFB2	277.928	-3.42497	1.53e-05	TRUE	FALSE	TRUE	FALSE	BosSINE2	+	4
ctg16-24177215-24177458	76.1958	88.4669	60.9994	27.4674	0.00124915	0.0309714	C16H1orf115	19.5429	-1.41883	0.0223244	TRUE	FALSE	TRUE	FALSE	BosSINEL	+	8
ctg16-26017611-26017825	82.0902	92.5438	69.2244	23.3194	0.00108524	0.0293547	HHIPL2	273.058	-6.37813	6.74e-06	TRUE	FALSE	TRUE	FALSE	BosSINE3	-	3
ctg16-27190433-27190652	80.1329	86.9736	71.9019	15.0716	0.00124915	0.0309714	TP53BP2	105.397	-3.05786	5.5e-05	TRUE	FALSE	TRUE	FALSE	BosSINE2	+	4
ctg16-28666542-28666726	78.998	88.2398	66.9981	21.2418	0.000707298	0.0243453	ENAH	191.138	-1.9456	0.000189489	TRUE	FALSE	TRUE	FALSE	BosSINE2	+	4
ctg16-28834877-28835095	90.5402	95.4969	84.4397	11.0571	0.00316858	0.0489652	EPHX1	76.3368	-1.80572	0.00814183	TRUE	TRUE	FALSE	FALSE	BosSINE2	+	3
ctg16-30598001-30598276	29.5214	16.0206	46.0914	-30.0707	0.00103778	0.0285926	SCCPDH	60.9137	-1.03876	0.00709097	TRUE	FALSE	TRUE	FALSE	BosSINEL	-	9
ctg16-3082126-3082315	65.7224	81.1146	46.7782	34.3364	0.000311152	0.0180281	NUAK2	88.9025	-1.25832	0.0270992	TRUE	FALSE	TRUE	FALSE	BosSINE3	+	3
ctg16-31737040-31737242	50.2581	41.8436	60.7919	-18.9483	0.00181226	0.0368407	KIF26B	42.851	-2.13017	0.000110036	TRUE	FALSE	TRUE	FALSE	BosSINE3	-	4
ctg16-31907536-31907743	78.431	86.8828	68.0288	18.854	2.00696e-05	0.0097305	KIF26B	42.851	-2.13017	0.000110036	TRUE	FALSE	TRUE	FALSE	BosSINE3	-	4
ctg16-3296527-3296724	28.6376	20.716	38.8468	-18.1308	0.000580014	0.0224556	LOC112441812	6.08885	-1.89875	0.030554	TRUE	FALSE	TRUE	FALSE	BosSINEL	+	9
ctg16-3352086-3352183	77.4178	86.3792	66.3885	19.9907	0.000229514	0.0167908	MFSD4A	322.005	-4.97906	1.17e-06	TRUE	FALSE	TRUE	FALSE	BosSINE3	+	3
ctg16-35095475-35095704	85.477	92.0217	78.1495	13.8722	0.000311152	0.0180281	WDR64	4.64306	2.67337	0.0326297	TRUE	FALSE	TRUE	FALSE	BosSINEL	+	7
ctg16-35226601-35226815	88.6244	93.806	82.0308	11.7752	0.00158754	0.0351234	KMO	562.736	3.329	7.17e-05	TRUE	FALSE	TRUE	FALSE	BosSINE3	+	3
ctg16-3542340-3542610	85.7517	92.6595	76.8798	15.7797	0.000473624	0.0209513	SLC41A1	599.899	-1.39803	0.000333076	TRUE	FALSE	TRUE	FALSE	BosSINEL	-	8
ctg16-3547204-3547334	81.1218	92.6271	66.9615	25.6655	0.00092863	0.0278673	SLC41A1	599.899	-1.39803	0.000333076	TRUE	FALSE	TRUE	FALSE	BosSINEL	+	3
ctg16-37346495-37346722	57.0911	65.0021	47.3545	17.6476	0.00298141	0.0468558	SELL	6757.54	2.63805	9.39e-05	TRUE	FALSE	TRUE	FALSE	BosSINE2	-	6
ctg16-38228128-38228398	83.1339	88.4474	76.3931	12.0543	0.000530614	0.0224556	PRRX1	3.06568	-2.47653	0.0354759	TRUE	FALSE	TRUE	FALSE	BosSINEL	+	6
ctg16-41530478-41530595	81.1945	89.4064	71.2115	18.1948	0.00126597	0.0309714	TNFRSF1B	5677.04	1.12084	0.00246805	TRUE	FALSE	TRUE	FALSE	BosSINE6	-	5
ctg16-41530528-41530607	79.3896	85.6943	71.7187	13.9756	0.000473624	0.0209513	TNFRSF1B	5677.04	1.12084	0.00246805	TRUE	FALSE	TRUE	FALSE	BosSINE1	-	7
ctg16-41563399-41563610	90.9887	96.8394	83.6121	13.2273	0.00100411	0.0285926	TNFRSF8	68.8191	1.97989	4.67e-05	TRUE	TRUE	FALSE	FALSE	BosSINE2	+	5
ctg16-41612680-41612875	83.4741	91.6673	73.599	18.0683	0.00108524	0.0293547	TNFRSF8	68.8191	1.97989	4.67e-05	TRUE	FALSE	TRUE	FALSE	BosSINE3	-	4
ctg16-42816872-42817146	84.561	92.2333	75.1817	17.0516	0.000858483	0.026256	CASZ1	285.486	-2.37094	0.000338111	TRUE	FALSE	TRUE	FALSE	BosSINEL	-	12
ctg16-42829957-42830171	67.9952	81.1044	52.8692	28.2352	0.000200254	0.0158399	CASZ1	285.486	-2.37094	0.000338111	TRUE	FALSE	TRUE	FALSE	BosSINE3	+	3
ctg16-44441696-44441910	85.7187	95.1344	73.4114	21.7229	0.000123526	0.013894	CA6	3.98837	-3.13432	0.016454	TRUE	FALSE	TRUE	FALSE	BosSINE3	-	3
ctg16-44465638-44465839	53.4147	63.4055	41.1183	22.2872	0.00124915	0.0309714	CA6	3.98837	-3.13432	0.016454	TRUE	FALSE	TRUE	FALSE	BosSINE2	-	4
ctg16-45441194-45441465	77.0759	81.7201	71.5095	10.2106	0.000858483	0.026256	TNFRSF9	73.9074	-2.26654	0.0114743	TRUE	FALSE	TRUE	FALSE	BosSINEL	-	6
ctg16-46801647-46801780	64.461	76.7417	49.0909	27.6507	0.000200254	0.0158399	KLHL21	376.568	-1.49346	0.000451463	TRUE	FALSE	TRUE	FALSE	BosSINEL	-	6
ctg16-46876086-46876303	88.7815	93.3352	83.1769	10.1582	0.00298141	0.0468558	PLEKHG5	18.1067	-1.50823	0.00189019	TRUE	TRUE	FALSE	FALSE	BosSINE2	-	4
ctg16-46948545-46948820	71.3188	84.6547	54.9054	29.7493	0.000250236	0.0167908	HES2	74.132	-4.10016	1.99e-06	TRUE	FALSE	FALSE	TRUE	BosSINEL	+	10
ctg16-4741900-4742175	87.8389	93.5001	81.1342	12.3659	0.00124915	0.0309714	FCAMR	29.4317	-3.8342	0.00201197	TRUE	FALSE	TRUE	FALSE	BosSINEL	+	9
ctg16-51796950-51797072	30.2707	16.57	47.1331	-30.5631	0.000200254	0.0158399	FBLIM1	58.6131	-2.00727	0.00413346	TRUE	FALSE	TRUE	FALSE	BosSINE6	+	5
ctg16-52032369-52032571	29.82	18.5538	43.6862	-25.1324	2.85866e-06	0.00818994	CELA2A	20.6255	3.38916	0.00248799	TRUE	FALSE	TRUE	FALSE	BosSINE3	-	5
ctg16-52065022-52065218	71.4918	82.357	58.1192	24.2378	0.00252352	0.0430208	EFHD2	14134.4	1.05064	0.00765428	TRUE	FALSE	TRUE	FALSE	BosSINE3	+	4
ctg16-52524442-52524653	83.7526	92.0476	74.3083	17.7393	0.000580014	0.0224556	KAZN	17.4112	-1.6417	0.00055595	TRUE	FALSE	TRUE	FALSE	BosSINE2	+	4
ctg16-52545270-52545469	63.9388	76.8499	48.3885	28.4614	0.000473624	0.0209513	KAZN	17.4112	-1.6417	0.00055595	TRUE	TRUE	FALSE	FALSE	BosSINE3	+	3
ctg16-52546063-52546252	78.8578	91.4001	64.0992	27.3009	2.00696e-05	0.0097305	KAZN	17.4112	-1.6417	0.00055595	TRUE	TRUE	FALSE	FALSE	BosSINE3	+	5
ctg16-52547335-52547537	79.0179	89.5711	65.6138	23.9574	2.67594e-05	0.0103792	KAZN	17.4112	-1.6417	0.00055595	TRUE	TRUE	FALSE	FALSE	BosSINE3	+	4
ctg16-52980444-52980673	76.0458	86.2564	65.3186	20.9378	0.000885616	0.0270574	KAZN	17.4112	-1.6417	0.00055595	TRUE	FALSE	TRUE	FALSE	BosSINE2	-	3
ctg16-53423602-53423820	57.1509	66.454	46.1471	20.3068	0.00178879	0.0363949	KAZN	17.4112	-1.6417	0.00055595	TRUE	FALSE	TRUE	FALSE	BosSINE2	+	4
ctg16-53608037-53608264	59.8586	67.9859	49.8558	18.1302	0.00124915	0.0309714	KAZN	17.4112	-1.6417	0.00055595	TRUE	FALSE	TRUE	FALSE	BosSINE2	+	4
ctg16-54112917-54113087	40.5369	30.2297	53.4911	-23.2614	0.000200254	0.0158399	LRRC38	1.18251	-5.19948	0.0227165	TRUE	FALSE	TRUE	FALSE	BosSINE3	+	4
ctg16-54118909-54119119	84.9603	92.7415	76.103	16.6385	5.74679e-06	0.00881238	LRRC38	1.18251	-5.19948	0.0227165	TRUE	FALSE	TRUE	FALSE	BosSINE3	-	6
ctg16-57434819-57434999	63.1223	58.2002	69.1154	-10.9152	0.00149782	0.0334817	LOC101902053	69.2458	3.62159	0.0001382	TRUE	FALSE	TRUE	FALSE	BosSINE3	+	3
ctg16-57443278-57443545	27.3204	11.1112	46.0981	-34.9869	0.00108524	0.0293547	LOC101902053	69.2458	3.62159	0.0001382	TRUE	FALSE	TRUE	FALSE	BosSINEL	-	7
ctg16-57947024-57947150	78.6483	84.5086	71.4356	13.073	0.000148393	0.0148443	PAPPA2	5.85276	-2.03757	0.0466805	TRUE	FALSE	TRUE	FALSE	BosSINE6	-	4
ctg16-59413837-59413939	89.6408	94.8427	83.2385	11.6042	0.000345092	0.0194558	LOC100299281	1536.67	-1.34918	0.000166422	TRUE	FALSE	TRUE	FALSE	BosSINE3	-	3
ctg16-59436202-59436348	90.9359	97.2956	83.2205	14.0751	0.000443811	0.0209513	LOC100299281	1536.67	-1.34918	0.000166422	TRUE	FALSE	TRUE	FALSE	BosSINE3	-	4
ctg16-60776465-60776679	76.4954	87.3438	63.1436	24.2002	0.000311152	0.0180281	AXDND1	53.8713	1.74229	0.00172665	TRUE	FALSE	TRUE	FALSE	BosSINE3	+	3
ctg16-63551698-63551828	80.635	88.0818	71.7282	16.3536	0.00015926	0.0148443	RGSL1	19.2636	-1.39926	0.0257589	TRUE	FALSE	TRUE	FALSE	BosSINE3	-	3
ctg16-64241638-64241825	25.8298	15.6071	38.4115	-22.8044	0.00103778	0.0285926	LAMC2	70.1588	-4.00526	4.55e-06	TRUE	FALSE	TRUE	FALSE	BosSINE2	-	7
ctg16-64325224-64325421	80.4457	91.5177	66.0044	25.5133	0.000250236	0.0167908	NMNAT2	43.3173	-1.23863	0.00704392	TRUE	FALSE	TRUE	FALSE	BosSINE3	+	3
ctg16-65704528-65704741	77.704	88.6479	65.0671	23.5808	0.000858483	0.026256	LOC107133260	11.0756	-5.6678	5.52e-05	TRUE	FALSE	FALSE	TRUE	BosSINE2	-	4
ctg16-66268584-66268801	94.0586	98.5615	88.5167	10.0448	0.000165129	0.015317	SWT1	498.918	1.50084	0.000197958	TRUE	FALSE	TRUE	FALSE	BosSINE3	+	3
ctg16-68078826-68079100	55.003	59.652	49.4206	10.2314	0.000707298	0.0243453	PLA2G4A	131.294	1.30595	0.00302051	TRUE	FALSE	TRUE	FALSE	BosSINEL	+	8
ctg16-69071060-69071262	74.1361	85.4502	59.9196	25.5307	0.00124915	0.0309714	PTPN14	143.253	-3.14058	1.7e-05	TRUE	FALSE	TRUE	FALSE	BosSINE3	-	4
ctg16-69091998-69092160	91.698	96.3165	86.0464	10.2701	0.000676282	0.0243453	PTPN14	143.253	-3.14058	1.7e-05	TRUE	FALSE	TRUE	FALSE	BosSINEL	-	4
ctg16-78855838-78856048	82.5851	90.5229	72.8154	17.7075	0.000793191	0.026256	NR5A2	2.80439	-4.25974	0.00361201	TRUE	FALSE	TRUE	FALSE	BosSINE3	-	3
ctg16-78898433-78898598	89.7385	94.676	83.6615	11.0145	0.000210536	0.0163489	NR5A2	2.80439	-4.25974	0.00361201	TRUE	FALSE	TRUE	FALSE	BosSINE4	+	3
ctg16-78928517-78928661	23.7586	18.0344	30.8038	-12.7695	0.0024763	0.0430208	NR5A2	2.80439	-4.25974	0.00361201	TRUE	FALSE	TRUE	FALSE	BosSINE2	-	3
ctg17-16640039-16640285	32.6178	21.0187	46.6924	-25.6738	0.000450363	0.0209513	RNF150	1109.51	1.08397	0.0057537	TRUE	FALSE	TRUE	FALSE	BosSINEL	+	5
ctg17-16649671-16649946	27.3251	14.5167	43.1716	-28.6549	1.97454e-06	0.00754262	RNF150	1109.51	1.08397	0.0057537	TRUE	FALSE	TRUE	FALSE	BosSINEL	+	9
ctg17-16660103-16660377	81.9174	88.3035	73.867	14.4365	0.000580014	0.0224556	RNF150	1109.51	1.08397	0.0057537	TRUE	FALSE	TRUE	FALSE	BosSINEL	+	8
ctg17-16699258-16699533	58.5356	52.4756	65.5454	-13.0698	0.00178879	0.0363949	RNF150	1109.51	1.08397	0.0057537	TRUE	FALSE	TRUE	FALSE	BosSINEL	-	10
ctg17-16810967-16811162	52.9157	42.8681	65.331	-22.463	4.62101e-05	0.0113782	RNF150	1109.51	1.08397	0.0057537	TRUE	FALSE	TRUE	FALSE	BosSINE3	+	5
ctg17-19426298-19426574	33.7699	21.705	48.9006	-27.1956	5.74679e-06	0.00881238	SLC7A11	890.29	1.19122	0.0190032	TRUE	FALSE	TRUE	FALSE	BosSINEL	+	10
ctg17-32410136-32410343	71.4311	79.645	61.2407	18.4043	0.000311152	0.0180281	FAT4	21.1346	-2.50515	0.000878056	TRUE	FALSE	TRUE	FALSE	BosSINE3	+	3
ctg17-39758905-39759164	68.5637	79.9926	54.9032	25.0894	0.000789641	0.026256	RAPGEF2	861.019	-1.50128	5.33e-05	TRUE	FALSE	TRUE	FALSE	BosSINEL	-	4
ctg17-39759177-39759441	86.4088	94.6824	76.7858	17.8966	0.000474196	0.020952	RAPGEF2	861.019	-1.50128	5.33e-05	TRUE	FALSE	TRUE	FALSE	BosSINEL	-	5
ctg17-39760301-39760565	70.2167	76.7289	62.7545	13.9744	0.000176916	0.0158399	RAPGEF2	861.019	-1.50128	5.33e-05	TRUE	FALSE	TRUE	FALSE	BosSINEL	+	5
ctg17-39803022-39803150	53.484	64.9892	39.854	25.1352	0.00298141	0.0468558	RAPGEF2	861.019	-1.50128	5.33e-05	TRUE	FALSE	TRUE	FALSE	BosSINEL	+	4
ctg17-39895632-39895760	87.0626	95.3021	76.605	18.6971	0.00265228	0.0446645	RAPGEF2	861.019	-1.50128	5.33e-05	TRUE	FALSE	TRUE	FALSE	BosSINE2	-	3
ctg17-42256507-42256775	71.4306	78.312	63.0686	15.2435	0.00149782	0.0334817	PDGFC	88.3799	-1.98066	0.000281828	TRUE	FALSE	TRUE	FALSE	BosSINEL	+	6
ctg17-42318229-42318361	74.833	88.7989	58.6589	30.14	7.73607e-05	0.0124599	PDGFC	88.3799	-1.98066	0.000281828	TRUE	FALSE	TRUE	FALSE	BosSINEL	-	4
ctg17-42362200-42362399	75.886	70.8943	81.8479	-10.9536	0.00178879	0.0363949	PDGFC	88.3799	-1.98066	0.000281828	TRUE	FALSE	TRUE	FALSE	BosSINE1	-	3
ctg17-42403275-42403338	76.616	87.4487	64.8806	22.5682	0.00220693	0.0407202	PDGFC	88.3799	-1.98066	0.000281828	TRUE	FALSE	TRUE	FALSE	BosSINE3	-	3
ctg17-46618010-46618240	77.0029	85.5885	66.7506	18.8378	0.000580014	0.0224556	RIMBP2	22.2736	1.31917	0.0432001	TRUE	FALSE	TRUE	FALSE	BosSINE3	-	5
ctg17-46625936-46626142	77.2564	84.0439	68.7501	15.2938	0.00298141	0.0468558	RIMBP2	22.2736	1.31917	0.0432001	TRUE	FALSE	TRUE	FALSE	BosSINE2	-	5
ctg17-47214387-47214592	74.9952	81.9533	66.9667	14.9867	0.00068698	0.0243453	TMEM132D	2.05844	-5.59437	0.00413346	TRUE	FALSE	TRUE	FALSE	BosSINE3	+	3
ctg17-47483077-47483285	61.7684	70.3659	51.1175	19.2484	0.00103778	0.0285926	TMEM132D	2.05844	-5.59437	0.00413346	TRUE	FALSE	TRUE	FALSE	BosSINE3	+	3
ctg17-47841183-47841428	74.2617	79.5438	67.566	11.9777	0.00252352	0.0430208	TMEM132D	2.05844	-5.59437	0.00413346	TRUE	FALSE	TRUE	FALSE	BosSINE2	-	3
ctg17-47916429-47916550	67.6636	73.9661	60.1022	13.8639	0.000200254	0.0158399	TMEM132D	2.05844	-5.59437	0.00413346	TRUE	FALSE	TRUE	FALSE	BosSINE6	-	4
ctg17-4982562-4982837	75.1226	82.2444	66.0664	16.178	0.00015926	0.0148443	LOC104974562	173.851	3.61829	0.000164484	TRUE	TRUE	FALSE	FALSE	BosSINEL	-	9
ctg17-4996815-4997083	87.5543	92.9421	80.7136	12.2285	0.00171346	0.0363949	TMEM154	4690.42	2.57348	6.78e-05	TRUE	FALSE	TRUE	FALSE	BosSINEL	+	4
ctg17-5016625-5016765	78.1472	85.59	69.1015	16.4885	0.00038477	0.0194558	TMEM154	4690.42	2.57348	6.78e-05	TRUE	FALSE	TRUE	FALSE	BosSINE5	+	3
ctg17-5035083-5035352	84.3328	89.8723	77.5149	12.3574	0.000311152	0.0180281	TMEM154	4690.42	2.57348	6.78e-05	TRUE	FALSE	TRUE	FALSE	BosSINEL	+	8
ctg17-5038499-5038691	75.781	71.1469	81.7641	-10.6172	0.00298141	0.0468558	TMEM154	4690.42	2.57348	6.78e-05	TRUE	TRUE	FALSE	FALSE	BosSINE4	-	3
ctg17-50750584-50750702	79.5859	92.3095	63.9865	28.323	0.000318992	0.0184259	AACS	323.16	-1.33357	0.00266362	TRUE	FALSE	TRUE	FALSE	BosSINE6	+	3
ctg17-51684932-51685093	40.6122	32.9506	50.5877	-17.637	0.00149782	0.0334817	LOC101904642	43.7896	-1.65189	1.96e-05	TRUE	FALSE	TRUE	FALSE	BosSINE5	-	4
ctg17-51787393-51787588	80.0662	88.4657	70.665	17.8008	0.00252352	0.0430208	CCDC92	16.813	-1.99221	0.00363198	TRUE	FALSE	TRUE	FALSE	BosSINE3	-	9
ctg17-52005689-52005952	55.4407	44.1021	68.6469	-24.5448	0.000580014	0.0224556	TCTN2	32.0655	-1.23917	0.00148908	TRUE	FALSE	TRUE	FALSE	BosSINEL	-	5
ctg17-52686409-52686610	85.2013	94.8343	73.321	21.5133	0.000250236	0.0167908	HIP1R	4133.77	2.72092	7.91e-05	TRUE	FALSE	TRUE	FALSE	BosSINE3	+	5
ctg17-53235938-53236207	79.7472	86.6351	71.405	15.2301	0.000580014	0.0224556	MLXIP	6422.07	1.31885	0.00248666	TRUE	FALSE	TRUE	FALSE	BosSINEL	-	9
ctg17-53259450-53259660	85.2682	96.4401	71.6877	24.7524	8.506e-05	0.0132745	MLXIP	6422.07	1.31885	0.00248666	TRUE	FALSE	TRUE	FALSE	BosSINE3	-	5
ctg17-53282327-53282456	26.3506	34.695	15.5374	19.1576	0.00103778	0.0285926	MLXIP	6422.07	1.31885	0.00248666	TRUE	FALSE	TRUE	FALSE	BosSINE2	+	9
ctg17-53555471-53555698	78.964	92.5132	61.9358	30.5774	0.00147414	0.0334817	TMEM120B	829.234	-3.34104	7.39e-05	TRUE	FALSE	TRUE	FALSE	BosSINE2	+	4
ctg17-53559941-53560059	77.9718	85.8823	68.2359	17.6464	0.000707298	0.0243453	TMEM120B	829.234	-3.34104	7.39e-05	TRUE	FALSE	TRUE	FALSE	BosSINE6	-	3
ctg17-55034188-55034379	82.1138	87.1047	75.9712	11.1335	0.00149782	0.0334817	CUX2	1.94252	-2.45745	0.0255156	TRUE	FALSE	TRUE	FALSE	BosSINE1	-	4
ctg17-57754634-57754844	77.95	84.0883	70.3952	13.6931	0.00178879	0.0363949	NOS1	107.947	-3.16402	7.16e-05	TRUE	FALSE	TRUE	FALSE	BosSINE3	+	4
ctg17-61012940-61013041	64.0713	72.297	53.3447	18.9523	0.00252352	0.0430208	SDSL	79.3596	2.57593	0.000102748	TRUE	FALSE	TRUE	FALSE	BosSINE2	+	4
ctg17-61288674-61288778	86.493	96.1219	74.3907	21.7312	8.64413e-05	0.0132745	SLC8B1	2111.85	1.83608	0.000317296	TRUE	FALSE	TRUE	FALSE	BosSINE3	+	3
ctg17-61292592-61292818	91.8717	97.1971	85.3363	11.8608	0.000311152	0.0180281	SLC8B1	2111.85	1.83608	0.000317296	TRUE	FALSE	TRUE	FALSE	BosSINE2	-	9
ctg17-61356661-61356872	85.0773	90.5217	78.1161	12.4056	0.000311152	0.0180281	OAS2	266.618	2.39576	0.000792316	TRUE	FALSE	TRUE	FALSE	BosSINE3	-	6
ctg17-61422934-61423142	57.4874	65.7	47.3795	18.3205	0.00212864	0.0396247	RPH3A	24.3525	3.06698	0.000454283	TRUE	FALSE	TRUE	FALSE	BosSINE3	-	3
ctg17-61558412-61558653	85.476	91.0052	78.5885	12.4167	0.00092863	0.0278673	RPH3A	24.3525	3.06698	0.000454283	TRUE	FALSE	TRUE	FALSE	BosSINE2	+	3
ctg17-61601865-61601985	26.7733	20.2719	34.775	-14.5031	5.74679e-06	0.00881238	RPH3A	24.3525	3.06698	0.000454283	TRUE	FALSE	TRUE	FALSE	BosSINE6	+	4
ctg17-61668857-61669073	86.9194	91.7898	80.925	10.8648	0.000707298	0.0243453	RPH3A	24.3525	3.06698	0.000454283	TRUE	FALSE	TRUE	FALSE	BosSINE2	-	4
ctg17-62410713-62411025	68.3431	74.7056	60.8146	13.891	5.9973e-05	0.011619	BICDL1	187.83	-2.35113	0.00143237	TRUE	FALSE	TRUE	FALSE	BosSINE1	+	5
ctg17-62468404-62468676	79.9062	85.1985	73.4688	11.7297	0.00103778	0.0285926	BICDL1	187.83	-2.35113	0.00143237	TRUE	FALSE	TRUE	FALSE	BosSINEL	-	6
ctg17-63612437-63612648	82.7603	88.195	76.0715	12.1235	0.000200254	0.0158399	MVK	155.804	-1.13968	0.00537506	TRUE	FALSE	TRUE	FALSE	BosSINE2	-	5
ctg17-64320890-64321103	83.7352	90.5229	75.5769	14.9459	0.000200254	0.0158399	TMEM119	55.2179	2.65681	4.47e-05	TRUE	TRUE	FALSE	FALSE	BosSINE3	+	4
ctg17-6647785-6648057	90.736	95.7524	84.8183	10.9341	0.00252352	0.0430208	SH3D19	125.56	-2.76504	0.000156512	TRUE	FALSE	TRUE	FALSE	BosSINEL	+	8
ctg17-67738608-67738832	86.4333	94.3421	76.5998	17.7423	0.00038477	0.0194558	TTC28	30.4554	-2.06393	5.83e-05	TRUE	FALSE	TRUE	FALSE	BosSINE2	-	4
ctg17-68921957-68922157	76.6309	93.6201	56.0029	37.6172	0.000731465	0.0250149	LOC101904268	1.51369	-5.85537	0.00210226	TRUE	TRUE	FALSE	FALSE	BosSINE2	-	4
ctg17-69987349-69987551	68.1078	77.5738	56.3478	21.226	0.000200254	0.0158399	PLA2G3	4.24212	-3.5042	0.0223614	TRUE	FALSE	TRUE	FALSE	BosSINEL	+	8
ctg17-69987696-69987905	80.7457	92.5159	65.6412	26.8747	4.62101e-05	0.0113782	PLA2G3	4.24212	-3.5042	0.0223614	TRUE	FALSE	TRUE	FALSE	BosSINE3	+	8
ctg17-70045466-70045739	89.3318	94.5184	83.1462	11.3722	0.000200254	0.0158399	LIMK2	1027.03	1.76917	0.00550626	TRUE	FALSE	TRUE	FALSE	BosSINEL	+	7
ctg17-70575332-70575526	81.02	90.7144	68.7286	21.9858	0.000858483	0.026256	SLC5A1	65.0955	-3.10375	0.00131842	TRUE	FALSE	TRUE	FALSE	BosSINE3	-	5
ctg17-70581370-70581633	75.5509	87.1345	61.378	25.7565	0.000311152	0.0180281	SLC5A1	65.0955	-3.10375	0.00131842	TRUE	FALSE	TRUE	FALSE	BosSINEL	+	11
ctg17-71451403-71451607	25.9418	16.1104	39.0637	-22.9534	0.000580014	0.0224556	GGT5	539.011	2.24429	9.32e-05	TRUE	TRUE	FALSE	FALSE	BosSINE3	-	5
ctg17-71468475-71468615	88.3044	92.8696	82.7679	10.1016	0.000858483	0.026256	GGT1	168.382	-3.19306	0.000231727	TRUE	FALSE	TRUE	FALSE	BosSINE2	+	3
ctg17-71472673-71472851	41.3291	48.2623	32.9869	15.2754	0.00252352	0.0430208	GGT1	168.382	-3.19306	0.000231727	TRUE	FALSE	FALSE	TRUE	BosSINE1	+	5
ctg17-71524790-71525000	81.0485	90.141	69.8895	20.2515	0.00124915	0.0309714	UPB1	183.368	3.01494	2.68e-06	TRUE	TRUE	TRUE	FALSE	BosSINE3	+	9
ctg17-71726136-71726225	90.8772	96.332	83.6286	12.7034	0.00312165	0.0483505	BCR	113.714	-1.76115	0.000617731	TRUE	FALSE	TRUE	FALSE	BosSINE6	-	8
ctg17-71758561-71758751	86.8762	93.231	79.2716	13.9594	0.00252352	0.0430208	BCR	113.714	-1.76115	0.000617731	TRUE	FALSE	TRUE	FALSE	BosSINE3	-	8
ctg17-71802277-71802494	78.3767	83.7922	71.7115	12.0806	0.00103778	0.0285926	RAB36	4.25596	-4.44993	0.000184114	TRUE	TRUE	TRUE	FALSE	BosSINE2	+	4
ctg17-72294876-72295075	82.8786	88.0549	76.5077	11.5472	0.00038477	0.0194558	CRKL	3214.97	1.3719	0.00135802	TRUE	FALSE	TRUE	FALSE	BosSINE2	-	7
ctg17-73112229-73112444	89.0866	93.7438	83.3548	10.3889	0.00124915	0.0309714	PRODH	256.669	1.10944	0.0110986	TRUE	FALSE	TRUE	FALSE	BosSINE2	-	4
ctg17-9690443-9690732	79.5496	86.2371	71.5385	14.6986	0.00124915	0.0309714	NR3C2	975.095	-5.07352	1.01e-06	TRUE	FALSE	TRUE	FALSE	BosSINEL	+	9
ctg17-9695900-9696102	71.5052	80.2906	60.6923	19.5983	0.000580014	0.0224556	NR3C2	975.095	-5.07352	1.01e-06	TRUE	FALSE	TRUE	FALSE	BosSINE3	-	3
ctg17-9697295-9697489	80.2957	90.1467	68.2644	21.8822	0.000450363	0.0209513	NR3C2	975.095	-5.07352	1.01e-06	TRUE	FALSE	TRUE	FALSE	BosSINE3	+	4
ctg17-9768729-9768941	82.8247	89.7214	74.8483	14.8731	0.000191287	0.0158399	NR3C2	975.095	-5.07352	1.01e-06	TRUE	FALSE	TRUE	FALSE	BosSINE3	+	3
ctg17-9813553-9813635	85.4917	91.5956	78.4487	13.1468	0.00151984	0.0338594	NR3C2	975.095	-5.07352	1.01e-06	TRUE	FALSE	TRUE	FALSE	BosSINE3	-	3
ctg18-10624821-10625096	86.4818	92.1016	79.6156	12.4859	0.00149782	0.0334817	ATP2C2	334.854	-5.33093	1.61e-07	TRUE	FALSE	TRUE	FALSE	BosSINEL	+	7
ctg18-11136315-11136514	58.6437	70.0764	44.8179	25.2584	0.000200254	0.0158399	KIAA0513	2758.95	1.08401	0.0059027	TRUE	FALSE	TRUE	FALSE	BosSINE3	+	3
ctg18-12362714-12362798	27.3817	15.8569	41.5662	-25.7093	0.000126017	0.013894	MTHFSD	23.4861	-1.19326	0.00278677	TRUE	FALSE	TRUE	FALSE	BosSINE6	+	5
ctg18-14390267-14390393	27.8261	10.2583	48.6981	-38.4398	0.000200254	0.0158399	ANKRD11	5006.81	1.4797	2.58e-05	TRUE	FALSE	TRUE	FALSE	BosSINE6	+	4
ctg18-19089039-19089118	63.0937	73.7635	49.9615	23.802	0.000126017	0.013894	NOD2	984.871	1.54897	9.8e-05	TRUE	FALSE	TRUE	FALSE	BosSINE2	+	3
ctg18-19092591-19092711	85.3073	92.1773	76.8519	15.3254	0.000296533	0.0180281	NOD2	984.871	1.54897	9.8e-05	TRUE	FALSE	TRUE	FALSE	BosSINE3	+	4
ctg18-23811787-23811969	85.5124	90.838	79.2898	11.5481	0.000858483	0.026256	LPCAT2	643.021	2.21929	0.000454283	TRUE	FALSE	TRUE	FALSE	BosSINEL	+	8
ctg18-25067940-25068122	77.0825	83.2078	69.7603	13.4476	0.00198806	0.0394187	NLRC5	2434.4	1.73624	3.68e-06	TRUE	FALSE	TRUE	FALSE	BosSINE3	+	3
ctg18-25282524-25282747	23.0825	8.20222	39.8477	-31.6455	1.49417e-05	0.0093863	PLLP	39.8238	-3.70306	4.36e-05	TRUE	FALSE	TRUE	FALSE	BosSINE2	+	5
ctg18-25596643-25596873	76.322	88.1777	61.7303	26.4474	4.11811e-05	0.0113782	ADGRG1	189.613	-2.70727	7.16e-05	TRUE	FALSE	TRUE	FALSE	BosSINE2	-	8
ctg18-25644253-25644477	45.1974	31.824	60.7665	-28.9425	0.00212864	0.0396247	ADGRG3	279.732	2.36024	0.00286982	TRUE	FALSE	FALSE	TRUE	BosSINE3	-	7
ctg18-25646518-25646749	60.7872	56.235	66.2809	-10.0459	0.00178879	0.0363949	ADGRG3	279.732	2.36024	0.00286982	TRUE	FALSE	TRUE	FALSE	BosSINEL	+	5
ctg18-26267640-26267915	81.1718	88.8208	71.621	17.1998	0.000858483	0.026256	NDRG4	231.212	-4.61029	1.18e-08	TRUE	FALSE	TRUE	FALSE	BosSINEL	+	11
ctg18-36064621-36064812	87.5823	95.9248	76.4148	19.51	0.000999205	0.0285926	CDH1	572.325	-2.44841	1.15e-05	TRUE	FALSE	TRUE	FALSE	BosSINE1	+	3
ctg18-43467924-43468112	85.0629	91.4411	77.2128	14.2283	0.00103778	0.0285926	RHPN2	160.653	-4.08183	3.54e-06	TRUE	FALSE	TRUE	FALSE	BosSINE3	+	6
ctg18-45785670-45785887	36.5422	41.371	30.7393	10.6317	0.000250236	0.0167908	HPN	68.5362	-3.58357	0.000104267	TRUE	FALSE	TRUE	FALSE	BosSINE2	+	7
ctg18-45787659-45787872	86.4664	92.6266	78.8846	13.7419	4.62101e-05	0.0113782	HPN	68.5362	-3.58357	0.000104267	TRUE	FALSE	TRUE	FALSE	BosSINE3	+	4
ctg18-46582518-46582726	86.01	91.8769	78.7892	13.0876	0.00252352	0.0430208	NFKBID	838.736	1.09069	0.00527961	TRUE	FALSE	TRUE	FALSE	BosSINE2	+	5
ctg18-46681256-46681449	50.4397	60.049	38.6128	21.4361	7.73607e-05	0.0124599	SYNE4	5.82466	-3.9309	0.00449824	TRUE	FALSE	FALSE	TRUE	BosSINE3	-	3
ctg18-48101193-48101322	81.6513	90.7875	70.4067	20.3808	0.000311152	0.0180281	SPINT2	554.682	-2.04804	0.00172642	TRUE	FALSE	TRUE	FALSE	BosSINE5	-	4
ctg18-48336307-48336577	81.1445	89.4837	71.3533	18.1304	0.000311152	0.0180281	RYR1	93.8414	1.23241	0.0220681	TRUE	FALSE	TRUE	FALSE	BosSINEL	+	7
ctg18-48350151-48350273	48.3102	34.7288	65.1796	-30.4508	0.00252352	0.0430208	RYR1	93.8414	1.23241	0.0220681	TRUE	FALSE	TRUE	FALSE	BosSINE6	-	3
ctg18-48553893-48554125	39.2525	46.5419	30.3071	16.2348	2.00696e-05	0.0097305	ECH1	218.374	-1.01676	0.000436893	TRUE	FALSE	TRUE	FALSE	BosSINE2	-	7
ctg18-48857347-48857550	74.7653	90.6477	55.3365	35.3112	0.000126017	0.013894	PAK4	177.265	-1.42135	0.00074664	TRUE	FALSE	TRUE	FALSE	BosSINE2	-	7
ctg18-48860136-48860432	67.7514	78.2051	54.8231	23.382	0.000250236	0.0167908	PAK4	177.265	-1.42135	0.00074664	TRUE	FALSE	TRUE	FALSE	BosSINE1	-	5
ctg18-48877733-48877931	81.6253	94.6995	65.534	29.1655	0.00230253	0.0418835	PAK4	177.265	-1.42135	0.00074664	TRUE	FALSE	TRUE	FALSE	BosSINE3	-	6
ctg18-48889587-48889705	90.843	95.8451	85.0256	10.8194	1.49417e-05	0.0093863	PAK4	177.265	-1.42135	0.00074664	TRUE	FALSE	TRUE	FALSE	BosSINE2	+	6
ctg18-51154895-51155094	79.6282	89.1458	67.9141	21.2317	0.000473624	0.0209513	POU2F2	112.807	1.6327	0.00322064	TRUE	FALSE	TRUE	FALSE	BosSINE3	-	3
ctg18-51160860-51161084	89.244	94.2595	83.273	10.9865	1.49417e-05	0.0093863	POU2F2	112.807	1.6327	0.00322064	TRUE	TRUE	TRUE	FALSE	BosSINE2	-	12
ctg18-51189489-51189664	75.7156	88.6472	59.6909	28.9563	0.00252352	0.0430208	GRIK5	6.11316	-1.9881	0.0230116	TRUE	FALSE	TRUE	FALSE	BosSINE2	-	3
ctg18-51201762-51201967	90.1897	95.3817	83.7995	11.5822	0.000200254	0.0158399	GRIK5	6.11316	-1.9881	0.0230116	TRUE	FALSE	TRUE	FALSE	BosSINE3	-	7
ctg18-51545606-51545818	31.9194	11.6778	56.6973	-45.0195	0.000549531	0.0224556	CD177	15.98	2.55208	0.000395434	TRUE	TRUE	TRUE	FALSE	BosSINE2	+	6
ctg18-51895877-51896063	81.6575	94.0031	66.4628	27.5403	0.00198806	0.0394187	LOC512005	75.6409	2.1467	0.000893252	TRUE	FALSE	TRUE	FALSE	BosSINE4	-	3
ctg18-52269676-52269870	60.1272	71.5805	46.1056	25.4749	0.000200254	0.0158399	ZNF112	13.9397	-3.05413	0.00287572	TRUE	FALSE	TRUE	FALSE	BosSINE2	+	8
ctg18-53193131-53193338	80.3599	89.0828	69.624	19.4588	0.00178879	0.0363949	GPR4	300.85	2.46019	0.000372492	TRUE	FALSE	TRUE	FALSE	BosSINE3	+	4
ctg18-53193978-53194243	88.6026	93.4013	82.4337	10.9676	7.90549e-05	0.0126412	GPR4	300.85	2.46019	0.000372492	TRUE	FALSE	TRUE	FALSE	BosSINEL	+	5
ctg18-54317512-54317710	74.9061	86.5594	60.2403	26.3191	9.90217e-05	0.0132745	C5AR1	6087.03	1.52635	0.018752	TRUE	FALSE	TRUE	FALSE	BosSINE3	-	3
ctg18-54321594-54321720	83.9523	90.2698	76.1769	14.0929	0.000858483	0.026256	C5AR1	6087.03	1.52635	0.018752	TRUE	FALSE	TRUE	FALSE	BosSINE3	+	3
ctg18-54337385-54337505	12.0954	2.675	23.6897	-21.0147	0.000729818	0.0250149	C5AR2	2086.37	1.62022	0.00810809	TRUE	FALSE	FALSE	TRUE	BosSINE6	-	3
ctg18-55240339-55240553	73.5314	78.6287	67.2577	11.3711	0.00178879	0.0363949	SULT2B1	4.59547	-3.05602	0.0113654	TRUE	FALSE	TRUE	FALSE	BosSINE2	+	5
ctg18-55427828-55427967	81.431	89.4443	72.2481	17.1962	7.73607e-05	0.0124599	HSD17B14	13.696	-2.97607	0.000102261	TRUE	FALSE	TRUE	FALSE	BosSINE2	+	4
ctg18-55431611-55431829	47.7722	56.7319	36.6031	20.1288	0.000250236	0.0167908	HSD17B14	13.696	-2.97607	0.000102261	TRUE	FALSE	TRUE	FALSE	BosSINE2	+	3
ctg18-56512454-56512558	50.9503	41.1519	63.01	-21.8581	0.00149782	0.0334817	NAPSA	116.406	2.06701	9.37e-05	TRUE	FALSE	TRUE	FALSE	BosSINE6	+	5
ctg18-60903663-60903741	92.845	98.2785	85.2682	13.0103	0.00177818	0.0363949	NLRP12	339.603	2.52115	0.00468277	TRUE	TRUE	FALSE	FALSE	BosSINEL	-	4
ctg18-60905455-60905669	83.8273	92.6089	72.9891	19.6199	9.90217e-05	0.0132745	NLRP12	339.603	2.52115	0.00468277	TRUE	TRUE	FALSE	FALSE	BosSINE2	-	5
ctg18-61008326-61008539	88.7642	95.3739	80.7744	14.5995	0.00270651	0.0453895	MGC157082	632.084	2.90038	2.28e-05	TRUE	FALSE	TRUE	FALSE	BosSINE3	-	3
ctg18-61021335-61021626	94.1696	99.2462	88.1212	11.1249	0.00143017	0.0334817	MGC157082	632.084	2.90038	2.28e-05	TRUE	TRUE	FALSE	FALSE	BosSINEL	-	3
ctg18-61140089-61140210	85.7178	90.9479	79.2808	11.6671	0.00149782	0.0334817	LOC513941	31.9575	3.17182	0.00176584	TRUE	TRUE	FALSE	FALSE	BosSINE6	+	3
ctg18-61187357-61187585	79.5424	86.4983	71.9008	14.5975	0.000210536	0.0163489	LOC527385	7.66869	5.35119	7.57e-06	TRUE	FALSE	TRUE	FALSE	BosSINE2	+	4
ctg18-62324696-62324771	77.9868	85.9281	68.2128	17.7153	0.00038477	0.0194558	EPS8L1	99.0864	-3.52255	1.36e-05	TRUE	FALSE	FALSE	TRUE	BosSINE3	-	3
ctg18-62367072-62367189	9.6289	0.979911	20.8103	-19.8303	0.00119406	0.0309714	LOC100848752	171.025	2.86578	0.000288731	TRUE	FALSE	TRUE	FALSE	BosSINE6	+	3
ctg18-62508541-62508756	84.5788	91.0961	76.7947	14.3014	0.00171346	0.0363949	NCR1	85.9481	2.04498	0.00877578	TRUE	TRUE	TRUE	FALSE	BosSINE2	+	4
ctg18-63298980-63299151	15.0042	2.39479	31.8167	-29.4219	0.000168846	0.0156387	TARM1	421.551	3.46323	2.49e-05	TRUE	FALSE	TRUE	FALSE	BosSINE2	-	3
ctg18-8347250-8347419	24.7927	14.8234	37.0625	-22.2391	0.000200254	0.0158399	PLCG2	1492.83	1.1816	0.000892137	TRUE	FALSE	TRUE	FALSE	BosSINEL	-	4
ctg18-8352089-8352363	40.4037	30.3072	52.7632	-22.456	2.00696e-05	0.0097305	PLCG2	1492.83	1.1816	0.000892137	TRUE	FALSE	TRUE	FALSE	BosSINEL	-	9
ctg18-8363938-8364023	17.5338	6.85195	30.8328	-23.9808	4.62101e-05	0.0113782	PLCG2	1492.83	1.1816	0.000892137	TRUE	FALSE	TRUE	FALSE	BosSINE2	+	8
ctg18-8364673-8364806	58.6879	50.8266	69.1698	-18.3432	7.79048e-05	0.0124996	PLCG2	1492.83	1.1816	0.000892137	TRUE	FALSE	TRUE	FALSE	BosSINE5	-	4
ctg19-10712754-10712961	49.9346	58.5312	39.0631	19.4682	0.000473624	0.0209513	VMP1	7036.11	2.23086	0.000667484	TRUE	FALSE	TRUE	FALSE	BosSINE3	+	6
ctg19-10778726-10779000	73.17	67.4923	79.7249	-12.2326	0.00038477	0.0194558	VMP1	7036.11	2.23086	0.000667484	TRUE	FALSE	TRUE	FALSE	BosSINEL	-	6
ctg19-10798758-10798879	83.0918	92.0687	72.2718	19.7969	0.00178879	0.0363949	VMP1	7036.11	2.23086	0.000667484	TRUE	FALSE	TRUE	FALSE	BosSINE6	+	3
ctg19-12663780-12663910	90.3602	96.554	83.0976	13.4564	0.000847085	0.026256	USP32	2413.55	1.65541	0.000221625	TRUE	FALSE	TRUE	FALSE	BosSINE2	-	6
ctg19-12707850-12708260	83.0223	92.7985	70.7961	22.0025	0.000580014	0.0224556	USP32	2413.55	1.65541	0.000221625	TRUE	FALSE	TRUE	FALSE	BosSINEL	+	11
ctg19-14466950-14467071	88.081	92.9234	82.1212	10.8023	0.000580014	0.0224556	CCL16	263.796	1.98859	0.010252	TRUE	FALSE	FALSE	TRUE	BosSINE2	-	6
ctg19-17346164-17346354	76.1642	81.5594	69.6998	11.8596	0.00298141	0.0468558	MYO1D	395.892	-1.42873	0.000443903	TRUE	FALSE	TRUE	FALSE	BosSINE3	-	4
ctg19-17547849-17548051	84.9718	90.364	78.9987	11.3653	0.00306841	0.0476466	MYO1D	395.892	-1.42873	0.000443903	TRUE	FALSE	TRUE	FALSE	BosSINE2	-	3
ctg19-17596484-17596692	90.8444	96.7271	83.2827	13.4444	0.000322675	0.0185482	MYO1D	395.892	-1.42873	0.000443903	TRUE	FALSE	TRUE	FALSE	BosSINE3	+	6
ctg19-17670913-17670976	89.632	95.786	82.4101	13.376	0.0012329	0.0309714	MYO1D	395.892	-1.42873	0.000443903	TRUE	FALSE	TRUE	FALSE	BosSINE5	+	4
ctg19-18650653-18650856	44.5677	32.9562	58.8588	-25.9025	0.00252352	0.0430208	NF1	377.675	1.03953	0.000294165	TRUE	FALSE	TRUE	FALSE	BosSINE3	-	7
ctg19-18782922-18783139	83.6275	95.0636	70.026	25.0376	0.000575562	0.0224556	NF1	377.675	1.03953	0.000294165	TRUE	FALSE	TRUE	FALSE	BosSINE2	-	4
ctg19-18860515-18860706	64.1174	74.2358	50.8027	23.4331	0.00198806	0.0394187	NF1	377.675	1.03953	0.000294165	TRUE	FALSE	TRUE	FALSE	BosSINE3	+	4
ctg19-18909880-18910082	86.1336	93.3703	77.2269	16.1434	0.00103778	0.0285926	LOC112442614	117.788	3.03638	1.64e-06	TRUE	FALSE	TRUE	FALSE	BosSINE3	-	4
ctg19-18916245-18916519	61.9581	56.241	69.4442	-13.2032	0.00298141	0.0468558	LOC112442614	117.788	3.03638	1.64e-06	TRUE	FALSE	TRUE	FALSE	BosSINEL	-	3
ctg19-19137842-19137898	86.1167	94.674	75.5846	19.0893	0.0015476	0.0344556	KSR1	673.148	1.3929	1.56e-05	TRUE	FALSE	TRUE	FALSE	BosSINE1	+	3
ctg19-19137867-19137947	79.2421	89.9994	66.0023	23.9971	0.000858483	0.026256	KSR1	673.148	1.3929	1.56e-05	TRUE	FALSE	TRUE	FALSE	BosSINE2	+	5
ctg19-19137896-19137964	79.0927	89.1328	66.7356	22.3972	0.00038477	0.0194558	KSR1	673.148	1.3929	1.56e-05	TRUE	FALSE	TRUE	FALSE	BosSINE1	+	4
ctg19-19194891-19195123	85.0431	95.4283	72.1789	23.2495	0.000148393	0.0148443	KSR1	673.148	1.3929	1.56e-05	TRUE	FALSE	TRUE	FALSE	BosSINE2	+	7
ctg19-19227655-19227842	20.0797	9.93594	32.5644	-22.6285	9.90217e-05	0.0132745	KSR1	673.148	1.3929	1.56e-05	TRUE	FALSE	TRUE	FALSE	BosSINE3	+	4
ctg19-19236210-19236485	73.9788	78.5865	68.0599	10.5266	0.00212864	0.0396247	KSR1	673.148	1.3929	1.56e-05	TRUE	FALSE	TRUE	FALSE	BosSINEL	+	6
ctg19-19432580-19432832	67.1574	72.3621	60.7516	11.6104	0.00103778	0.0285926	NOS2	7341.98	1.93245	0.00754336	TRUE	FALSE	FALSE	TRUE	BosSINEL	+	7
ctg19-20952096-20952202	59.3914	68.3323	48.3872	19.9451	0.000311152	0.0180281	SSH2	7364.64	1.51985	0.0184741	TRUE	FALSE	TRUE	FALSE	BosSINE6	-	3
ctg19-20971672-20971858	86.2857	95.2555	75.4715	19.784	0.00196518	0.0394135	SSH2	7364.64	1.51985	0.0184741	TRUE	FALSE	TRUE	FALSE	BosSINE3	+	5
ctg19-20979177-20979375	28.7466	21.2913	37.9223	-16.6311	5.9973e-05	0.011619	SSH2	7364.64	1.51985	0.0184741	TRUE	FALSE	TRUE	FALSE	BosSINE3	+	5
ctg19-20991749-20992014	88.421	94.8805	80.6301	14.2504	0.000250236	0.0167908	SSH2	7364.64	1.51985	0.0184741	TRUE	FALSE	TRUE	FALSE	BosSINEL	+	10
ctg19-21090987-21091159	19.8909	6.37083	36.3137	-29.9428	0.00247324	0.0430208	SSH2	7364.64	1.51985	0.0184741	TRUE	FALSE	TRUE	FALSE	BosSINE3	-	3
ctg19-21916900-21917080	88.5285	93.3539	82.5163	10.8375	0.000473624	0.0209513	NXN	158.264	-2.01702	0.000335554	TRUE	FALSE	TRUE	FALSE	BosSINE1	-	3
ctg19-21985473-21985689	91.4079	96.4087	85.2531	11.1557	0.00149782	0.0334817	NXN	158.264	-2.01702	0.000335554	TRUE	FALSE	TRUE	FALSE	BosSINE2	-	5
ctg19-21989507-21989777	85.9432	90.907	80.1163	10.7907	0.00100411	0.0285926	NXN	158.264	-2.01702	0.000335554	TRUE	FALSE	TRUE	FALSE	BosSINEL	+	7
ctg19-24941374-24941489	66.7725	58.731	76.2553	-17.5243	0.000250236	0.0167908	SPNS2	240.582	-3.13321	8.19e-06	TRUE	FALSE	TRUE	FALSE	BosSINE6	+	4
ctg19-24943725-24943941	84.7571	91.333	77.2394	14.0935	0.00149782	0.0334817	SPNS2	240.582	-3.13321	8.19e-06	TRUE	FALSE	TRUE	FALSE	BosSINE2	+	4
ctg19-24946352-24946493	73.0631	85.3525	57.9377	27.4148	0.000250236	0.0167908	SPNS2	240.582	-3.13321	8.19e-06	TRUE	FALSE	TRUE	FALSE	BosSINE3	+	5
ctg19-24995467-24995739	84.0709	88.9227	78.0922	10.8305	0.00103778	0.0285926	SPNS2	240.582	-3.13321	8.19e-06	TRUE	FALSE	TRUE	FALSE	BosSINEL	-	9
ctg19-25182004-25182180	81.7402	88.7292	73.1385	15.5907	0.00038477	0.0194558	SLC13A5	2814.93	2.13603	0.00187155	TRUE	FALSE	TRUE	FALSE	BosSINE1	-	3
ctg19-25651845-25652116	80.277	88.2703	70.4634	17.8069	0.00149782	0.0334817	WSCD1	4.46822	-3.16144	0.00331911	TRUE	FALSE	TRUE	FALSE	BosSINEL	-	7
ctg19-28342896-28343015	9.68879	1.00078	20.3817	-19.3809	6.2648e-05	0.0121248	PIK3R6	233.74	2.12174	9.97e-05	TRUE	FALSE	FALSE	TRUE	BosSINE6	-	4
ctg19-28383028-28383087	79.904	93.9873	62.6292	31.3582	0.00015429	0.0148443	PIK3R5	2502.21	2.16047	5.22e-06	TRUE	TRUE	TRUE	FALSE	BosSINE2	+	4
ctg19-28485908-28486023	84.7868	91.2016	76.8767	14.3249	0.000858483	0.026256	NTN1	79.3484	-2.09839	0.002399	TRUE	FALSE	TRUE	FALSE	BosSINE6	-	4
ctg19-28576352-28576546	90.0282	95.4365	83.4434	11.9931	0.00229104	0.0418835	NTN1	79.3484	-2.09839	0.002399	TRUE	FALSE	TRUE	FALSE	BosSINE3	-	4
ctg19-28942132-28942259	63.3605	73.3983	51.2846	22.1136	0.000858483	0.026256	USP43	65.2158	-2.95649	1.15e-05	TRUE	FALSE	TRUE	FALSE	BosSINE3	-	3
ctg19-31166796-31166958	81.8017	90.1635	71.5103	18.6533	9.90217e-05	0.0132745	MYOCD	13.2233	-1.8527	0.00374078	TRUE	FALSE	TRUE	FALSE	BosSINE5	-	3
ctg19-40073976-40074171	68.2287	80.5734	51.9963	28.577	0.000223199	0.0167908	ERBB2	153.177	-2.83058	7.37e-05	TRUE	FALSE	TRUE	FALSE	BosSINE3	+	3
ctg19-40077514-40077621	86.2316	96.2844	73.859	22.4254	0.0001861	0.0158399	ERBB2	153.177	-2.83058	7.37e-05	TRUE	FALSE	TRUE	FALSE	BosSINE6	-	3
ctg19-40086969-40087244	80.0285	85.7606	73.0832	12.6774	0.00103778	0.0285926	ERBB2	153.177	-2.83058	7.37e-05	TRUE	FALSE	TRUE	FALSE	BosSINEL	-	4
ctg19-40466555-40466837	91.899	96.2973	85.6448	10.6525	0.00103778	0.0285926	RAPGEFL1	26.3434	-2.50593	0.000923725	TRUE	FALSE	TRUE	FALSE	BosSINEL	-	8
ctg19-40716943-40717164	79.4721	85.2422	72.3705	12.8717	0.00149782	0.0334817	TNS4	52.1998	-3.09543	0.000617731	TRUE	FALSE	TRUE	FALSE	BosSINE2	+	6
ctg19-41733956-41734146	74.6094	90.5441	54.9974	35.5467	0.000414629	0.0205211	KRT19	1530.8	-3.55599	2.21e-05	TRUE	FALSE	TRUE	FALSE	BosSINE2	+	9
ctg19-41981211-41981428	82.8276	91.7909	71.9555	19.8354	0.000473624	0.0209513	JUP	464.652	-2.59973	5.13e-05	TRUE	FALSE	TRUE	FALSE	BosSINE2	+	7
ctg19-42441940-42442158	50.7817	44.8702	58.0986	-13.2283	0.00298141	0.0468558	STAT3	5549.42	1.02159	0.0130101	TRUE	FALSE	TRUE	FALSE	BosSINE2	-	8
ctg19-42443261-42443385	54.2095	46.6604	64.275	-17.6146	0.00181226	0.0368407	STAT3	5549.42	1.02159	0.0130101	TRUE	FALSE	TRUE	FALSE	BosSINE6	+	3
ctg19-42445617-42445793	88.0456	96.2211	77.8925	18.3287	7.07991e-05	0.0124599	STAT3	5549.42	1.02159	0.0130101	TRUE	FALSE	TRUE	FALSE	BosSINE3	+	4
ctg19-42446900-42447152	85.9428	92.9797	77.4571	15.5226	0.000473624	0.0209513	STAT3	5549.42	1.02159	0.0130101	TRUE	FALSE	TRUE	FALSE	BosSINEL	+	11
ctg19-44867404-44867515	21.9469	11.2926	34.9703	-23.6777	0.000473624	0.0209513	FMNL1	4085.87	1.44967	0.00101446	TRUE	FALSE	TRUE	FALSE	BosSINE6	+	7
ctg19-48572425-48572547	19.9217	10.4578	31.4808	-21.0229	0.000473624	0.0209513	PECAM1	149.672	1.19737	0.0457106	TRUE	FALSE	TRUE	FALSE	BosSINE6	-	5
ctg19-48581707-48581918	86.9707	94.4944	77.5781	16.9164	0.000311152	0.0180281	PECAM1	149.672	1.19737	0.0457106	TRUE	FALSE	TRUE	FALSE	BosSINE3	-	6
ctg19-48607036-48607231	56.0674	63.0344	47.6218	15.4126	1.09926e-05	0.00901759	PECAM1	149.672	1.19737	0.0457106	TRUE	FALSE	TRUE	FALSE	BosSINE3	+	3
ctg19-50780341-50780498	84.929	96.9208	69.9363	26.9845	0.000852117	0.026256	FASN	30565.6	-4.57587	5.6e-07	TRUE	FALSE	TRUE	FALSE	BosSINE2	+	6
ctg19-52646793-52646994	84.8409	93.507	74.175	19.332	0.000450363	0.0209513	LOC101907247	8.77796	-4.14117	0.000353802	TRUE	FALSE	TRUE	FALSE	BosSINE2	-	4
ctg19-53799173-53799300	82.4586	87.701	76.0064	11.6946	0.00149782	0.0334817	PGS1	972.326	1.6141	0.000111912	TRUE	FALSE	TRUE	FALSE	BosSINE6	-	3
ctg19-5528072-5528199	17.0684	5.70312	31.0564	-25.3533	0.000707298	0.0243453	HLF	440.433	-2.55833	0.00110205	TRUE	FALSE	TRUE	FALSE	BosSINE6	-	3
ctg19-55739762-55740037	89.6521	94.0815	83.8566	10.2248	0.000250236	0.0167908	TRIM47	71.9444	-1.09235	0.00583154	TRUE	FALSE	FALSE	TRUE	BosSINEL	+	7
ctg19-55870814-55871010	86.3239	93.0099	78.0949	14.915	0.00158754	0.0351234	ITGB4	100.688	-2.38638	0.000372973	TRUE	FALSE	TRUE	FALSE	BosSINE3	-	6
ctg19-56005983-56006249	85.5317	94.6278	74.6375	19.9903	9.90217e-05	0.0132745	LLGL2	289.362	-1.6053	0.000218082	TRUE	FALSE	TRUE	FALSE	BosSINEL	-	8
ctg19-56013682-56013851	86.0784	95.0563	75.0288	20.0274	0.000789641	0.026256	LLGL2	289.362	-1.6053	0.000218082	TRUE	FALSE	TRUE	FALSE	BosSINE3	-	4
ctg19-56461345-56461554	90.1769	94.8662	84.4054	10.4609	0.00171346	0.0363949	HID1	166.099	-2.95334	6.71e-05	TRUE	FALSE	TRUE	FALSE	BosSINE3	+	5
ctg19-56950930-56951054	89.7942	96.3837	81.6708	14.7129	0.00103778	0.0285926	CD300A	402.202	2.10191	0.00135802	TRUE	FALSE	TRUE	FALSE	BosSINE2	-	4
ctg19-57175083-57175162	81.8931	92.7344	68.55	24.1844	0.000858483	0.026256	TTYH2	387.388	1.07349	0.0314513	TRUE	FALSE	TRUE	FALSE	BosSINE3	-	4
ctg19-57672838-57673019	85.2411	92.3714	76.8935	15.4779	0.000473624	0.0209513	SDK2	5.21013	-3.41379	0.000887119	TRUE	FALSE	TRUE	FALSE	BosSINE3	+	8
ctg19-57896685-57896891	77.3229	83.8601	69.8528	14.0073	0.00178879	0.0363949	SDK2	5.21013	-3.41379	0.000887119	TRUE	FALSE	TRUE	FALSE	BosSINE3	-	3
ctg19-57923555-57923636	85.9045	94.6519	74.9592	19.6927	0.000200254	0.0158399	SDK2	5.21013	-3.41379	0.000887119	TRUE	FALSE	TRUE	FALSE	BosSINE3	+	5
ctg19-58006757-58006916	84.4853	92.1819	74.6957	17.4862	0.000707298	0.0243453	SDK2	5.21013	-3.41379	0.000887119	TRUE	FALSE	TRUE	FALSE	BosSINE3	+	5
ctg19-58009048-58009250	85.5199	90.5566	79.4796	11.0771	0.000580014	0.0224556	SDK2	5.21013	-3.41379	0.000887119	TRUE	FALSE	TRUE	FALSE	BosSINE2	+	8
ctg19-58563594-58563800	59.577	68.3359	48.9074	19.4285	0.00149782	0.0334817	LOC101907523	48.7845	-2.47778	0.000233316	TRUE	FALSE	TRUE	FALSE	BosSINE3	-	6
ctg19-58595196-58595396	85.6563	90.1921	80.0506	10.1415	0.000707298	0.0243453	LOC101907523	48.7845	-2.47778	0.000233316	TRUE	FALSE	TRUE	FALSE	BosSINE3	-	8
ctg19-58608035-58608228	86.3363	81.8396	91.9464	-10.1068	0.00252352	0.0430208	LOC101907523	48.7845	-2.47778	0.000233316	TRUE	TRUE	FALSE	FALSE	BosSINE3	-	6
ctg19-58665214-58665438	88.8208	94.5283	81.4404	13.088	0.00015926	0.0148443	LOC101907523	48.7845	-2.47778	0.000233316	TRUE	FALSE	TRUE	FALSE	BosSINE2	+	10
ctg19-58680420-58680641	83.887	89.8149	76.1895	13.6253	0.00286031	0.0468558	LOC101907523	48.7845	-2.47778	0.000233316	TRUE	FALSE	TRUE	FALSE	BosSINE2	+	5
ctg19-60679920-60680136	79.3763	90.2357	65.9628	24.2729	0.00298141	0.0468558	KCNJ16	83.612	1.85424	0.00526129	TRUE	TRUE	TRUE	FALSE	BosSINE3	+	3
ctg19-60691816-60692025	70.1724	82.7354	54.7103	28.0252	0.00015926	0.0148443	KCNJ16	83.612	1.85424	0.00526129	TRUE	TRUE	TRUE	FALSE	BosSINE3	+	3
ctg19-60714712-60714898	78.3821	88.0559	66.476	21.5799	0.00178879	0.0363949	KCNJ16	83.612	1.85424	0.00526129	TRUE	FALSE	TRUE	FALSE	BosSINE3	+	8
ctg19-61367696-61367890	82.5427	92.5871	69.921	22.6661	1.49417e-05	0.0093863	ABCA10	339.774	1.28049	0.0176168	TRUE	FALSE	TRUE	FALSE	BosSINE4	+	6
ctg19-61640242-61640456	83.5494	94.3801	68.8707	25.5094	0.000203265	0.0160501	LOC107131549	12.4912	-3.36097	0.00597563	TRUE	FALSE	TRUE	FALSE	BosSINE3	-	3
ctg19-61754991-61755151	91.4816	98.0323	83.4192	14.6131	2.45122e-05	0.0103792	WIPI1	350.821	-1.42619	0.0131455	TRUE	FALSE	TRUE	FALSE	BosSINE5	+	3
ctg19-61823914-61824112	70.8411	66.3667	76.8069	-10.4403	0.000580014	0.0224556	ARSG	497.616	1.94312	0.000402318	TRUE	FALSE	TRUE	FALSE	BosSINE3	+	3
ctg19-61834402-61834516	12.5367	0.542969	26.9115	-26.3686	3.18907e-05	0.0107934	ARSG	497.616	1.94312	0.000402318	TRUE	FALSE	TRUE	FALSE	BosSINE6	-	4
ctg19-62008743-62008853	84.5519	91.2571	76.4715	14.7856	0.00124915	0.0309714	LOC112442742	9.95727	-2.46182	0.0408333	TRUE	TRUE	FALSE	FALSE	BosSINE5	-	9
ctg19-8084860-8085078	80.0874	93.2404	63.8474	29.393	0.00124915	0.0309714	LOC101904698	5.98793	-2.38477	0.0340161	TRUE	FALSE	TRUE	FALSE	BosSINE2	+	5
ctg19-8227523-8227609	58.2604	47.831	69.1401	-21.3091	0.00124915	0.0309714	MSI2	651.09	-1.62792	0.0122537	TRUE	FALSE	TRUE	FALSE	BosSINE4	+	4
ctg19-8725071-8725200	79.944	90.1156	67.425	22.6906	0.00124915	0.0309714	CUEDC1	179.534	-3.30057	8.25e-06	TRUE	FALSE	TRUE	FALSE	BosSINE2	-	4
ctg19-8734347-8734583	92.3479	96.8083	86.4855	10.3229	0.00260089	0.0442301	CUEDC1	179.534	-3.30057	8.25e-06	TRUE	FALSE	TRUE	FALSE	BosSINE1	+	3
ctg19-8750321-8750664	69.8932	77.8021	60.1259	17.6762	4.62101e-05	0.0113782	CUEDC1	179.534	-3.30057	8.25e-06	TRUE	FALSE	TRUE	FALSE	BosSINEL	+	9
ctg19-8750670-8750938	86.3485	93.5964	77.2943	16.3021	0.000575562	0.0224556	CUEDC1	179.534	-3.30057	8.25e-06	TRUE	FALSE	TRUE	FALSE	BosSINEL	+	6
ctg19-9340147-9340330	86.5498	96.8029	74.8287	21.9741	7.16786e-05	0.0124599	RNF43	36.0856	-1.49491	0.0142352	TRUE	FALSE	TRUE	FALSE	BosSINE2	+	8
ctg19-9342793-9343066	91.3857	95.9652	85.7951	10.1701	0.00124915	0.0309714	RNF43	36.0856	-1.49491	0.0142352	TRUE	FALSE	TRUE	FALSE	BosSINEL	-	7
ctg19-9556399-9556565	67.4098	74.5604	58.609	15.9514	0.00212864	0.0396247	TEX14	11.4775	-1.57036	0.0088822	TRUE	FALSE	TRUE	FALSE	BosSINE2	-	3
ctg2-100320186-100320409	82.5776	87.6479	76.3372	11.3107	0.00178879	0.0363949	ERBB4	34.5087	-2.22582	0.00133048	TRUE	FALSE	TRUE	FALSE	BosSINE3	+	3
ctg2-101470941-101471063	56.7827	65.6389	46.1994	19.4395	0.000858436	0.026256	SPAG16	10.2423	-2.04262	0.00602002	TRUE	FALSE	TRUE	FALSE	BosSINE2	-	3
ctg2-101752190-101752320	82.7796	90.6064	73.5736	17.0329	0.000311152	0.0180281	SPAG16	10.2423	-2.04262	0.00602002	TRUE	FALSE	TRUE	FALSE	BosSINEL	+	4
ctg2-105955846-105956059	77.4414	88.7481	63.5254	25.2227	0.000473624	0.0209513	TNS1	1718.87	1.77723	0.0024101	TRUE	FALSE	TRUE	FALSE	BosSINE3	-	5
ctg2-106068793-106069066	89.5846	94.738	83.2221	11.5159	0.00178879	0.0363949	TNS1	1718.87	1.77723	0.0024101	TRUE	FALSE	TRUE	FALSE	BosSINEL	-	7
ctg2-118189871-118190088	85.1287	90.0969	79.0141	11.0828	0.00149782	0.0334817	SP110	367.535	1.42089	3.73e-05	TRUE	FALSE	TRUE	FALSE	BosSINE3	+	3
ctg2-118201048-118201264	78.6022	92.7566	61.4254	31.3312	0.000624034	0.0239174	SP110	367.535	1.42089	3.73e-05	TRUE	FALSE	TRUE	FALSE	BosSINE2	-	5
ctg2-118218889-118218997	86.347	93.0396	78.9349	14.1046	0.00197787	0.0394187	SP110	367.535	1.42089	3.73e-05	TRUE	FALSE	TRUE	FALSE	BosSINE6	-	4
ctg2-118373593-118373866	35.9709	23.4187	51.6677	-28.249	0.00158966	0.0351234	SP140L	1137.16	2.65111	1.05e-06	TRUE	FALSE	TRUE	FALSE	BosSINEL	-	6
ctg2-118482830-118483039	57.0333	48.3375	67.7359	-19.3984	0.000707298	0.0243453	LOC112443148	18.3395	2.60551	0.000468713	TRUE	FALSE	TRUE	FALSE	BosSINE3	-	3
ctg2-118996840-118996968	77.9843	73.2422	84.1785	-10.9363	0.00178879	0.0363949	ARMC9	23.5322	-1.4749	0.00197417	TRUE	FALSE	TRUE	FALSE	BosSINE6	+	4
ctg2-119048738-119048861	87.5374	94.5462	78.9292	15.617	0.000148393	0.0148443	ARMC9	23.5322	-1.4749	0.00197417	TRUE	FALSE	TRUE	FALSE	BosSINE5	+	4
ctg2-119073392-119073609	44.4834	38.7957	51.7692	-12.9735	0.00252352	0.0430208	ARMC9	23.5322	-1.4749	0.00197417	TRUE	FALSE	TRUE	FALSE	BosSINE2	+	5
ctg2-121287832-121287947	12.944	2.84375	25.375	-22.5312	0.000318992	0.0184259	FAM167B	51.3188	2.39169	6.76e-05	TRUE	FALSE	FALSE	TRUE	BosSINE6	+	4
ctg2-122289167-122289366	88.6474	95.8906	79.7327	16.1579	0.001156	0.0309714	FABP3	5565.44	-5.55373	5.13e-08	TRUE	FALSE	TRUE	FALSE	BosSINE2	-	4
ctg2-124253612-124253739	82.6473	91.1984	72.2538	18.9445	0.000473624	0.0209513	PTPRU	24.3053	-3.54689	0.000474973	TRUE	FALSE	TRUE	FALSE	BosSINE6	+	4
ctg2-125690421-125690531	54.3764	45.3512	65.7079	-20.3567	0.000473624	0.0209513	FGR	2741.99	1.78389	3.6e-05	TRUE	TRUE	FALSE	FALSE	BosSINE6	-	6
ctg2-126256897-126257114	89.6759	94.4561	83.6718	10.7843	0.00149782	0.0334817	KDF1	17.7399	-3.6847	0.00129405	TRUE	FALSE	FALSE	TRUE	BosSINE2	+	5
ctg2-126357016-126357210	87.8918	96.5455	77.4404	19.1052	0.00158966	0.0351234	ZDHHC18	4299.47	1.1753	0.00349202	TRUE	FALSE	TRUE	FALSE	BosSINE3	+	4
ctg2-126831701-126831832	21.5368	13.6365	31.2603	-17.6238	1.97454e-06	0.00754262	UBXN11	9.22182	-1.23034	0.0230116	TRUE	FALSE	TRUE	FALSE	BosSINE6	-	3
ctg2-127048546-127048731	78.0443	85.1841	68.8803	16.3038	0.000473624	0.0209513	SLC30A2	60.801	-5.92806	7.06e-06	TRUE	TRUE	TRUE	FALSE	BosSINE3	+	3
ctg2-129335781-129335899	76.8971	90.0292	60.7346	29.2946	0.000473624	0.0209513	E2F2	1218.56	2.94156	1.11e-05	TRUE	FALSE	TRUE	FALSE	BosSINE6	-	3
ctg2-129372959-129373189	80.029	88.9879	68.8491	20.1387	0.000473624	0.0209513	ASAP3	31.406	-2.21634	0.00703929	TRUE	FALSE	TRUE	FALSE	BosSINEL	+	8
ctg2-129395900-129396174	82.1979	92.4819	69.5406	22.9413	7.73607e-05	0.0124599	ASAP3	31.406	-2.21634	0.00703929	TRUE	FALSE	TRUE	FALSE	BosSINEL	+	9
ctg2-131326437-131326563	87.0437	94.525	77.8359	16.6891	0.000923226	0.0278673	ECE1	2832.04	1.58695	0.00205688	TRUE	FALSE	TRUE	FALSE	BosSINE6	+	3
ctg2-132472950-132473047	75.7178	87.6729	60.1717	27.5012	2.67594e-05	0.0103792	PLA2G2C	2.57397	-4.19782	0.00976416	TRUE	FALSE	TRUE	FALSE	BosSINE2	+	3
ctg2-132480829-132481035	70.9574	82.6269	56.2054	26.4214	0.00038477	0.0194558	PLA2G2C	2.57397	-4.19782	0.00976416	TRUE	FALSE	TRUE	FALSE	BosSINE3	-	6
ctg2-132647755-132647959	76.9773	83.6504	68.9375	14.7129	0.00103778	0.0285926	PLA2G5	113.669	2.36027	0.0016387	TRUE	FALSE	TRUE	FALSE	BosSINE3	-	3
ctg2-134185716-134185918	83.4277	92.3363	72.6606	19.6757	0.00286031	0.0468558	KLHDC7A	122.353	-4.10998	6.32e-06	TRUE	TRUE	FALSE	FALSE	BosSINE3	+	4
ctg2-135279452-135279580	22.6236	9.28389	37.1718	-27.8879	0.00106627	0.0293027	PADI4	236.965	2.01116	0.00372433	TRUE	FALSE	TRUE	FALSE	BosSINE6	+	3
ctg2-135350586-135350706	88.201	93.894	81.0868	12.8072	0.00178879	0.0363949	PADI1	6.56396	-4.47	0.0100241	TRUE	FALSE	TRUE	FALSE	BosSINE6	+	5
ctg2-135367040-135367220	84.4767	90.7646	76.7378	14.0268	0.000250236	0.0167908	PADI1	6.56396	-4.47	0.0100241	TRUE	FALSE	TRUE	FALSE	BosSINE1	-	6
ctg2-135385288-135385487	52.9933	61.0418	43.2762	17.7656	0.00212864	0.0396247	PADI1	6.56396	-4.47	0.0100241	TRUE	FALSE	TRUE	FALSE	BosSINE2	+	5
ctg2-18746630-18746878	89.3139	95.9846	81.1567	14.8279	0.000580014	0.0224556	LOC112442547	158.212	1.32743	0.004826	TRUE	FALSE	TRUE	FALSE	BosSINEL	+	8
ctg2-18746762-18746892	83.7621	95.2242	69.6548	25.5694	0.000148393	0.0148443	LOC112442547	158.212	1.32743	0.004826	TRUE	FALSE	TRUE	FALSE	BosSINE1	+	4
ctg2-22149507-22149672	62.3606	70.8567	52.1365	18.7202	0.00178879	0.0363949	WIPF1	5678.46	1.13152	0.00142152	TRUE	FALSE	TRUE	FALSE	BosSINE3	-	4
ctg2-24505058-24505252	77.5169	71.21	85.1794	-13.9694	0.00252352	0.0430208	METAP1D	20.0348	-1.23819	0.00147324	TRUE	FALSE	TRUE	FALSE	BosSINE2	+	3
ctg2-27542418-27542677	81.9877	91.6065	70.4144	21.192	0.00286031	0.0468558	CERS6	453.51	1.22559	0.00390573	TRUE	FALSE	TRUE	FALSE	BosSINEL	-	4
ctg2-27548108-27548374	89.5632	94.5906	83.0338	11.5568	0.000250236	0.0167908	CERS6	453.51	1.22559	0.00390573	TRUE	FALSE	TRUE	FALSE	BosSINEL	+	7
ctg2-29059435-29059545	85.7715	90.6227	79.4425	11.1802	2.00696e-05	0.0097305	XIRP2	7.85301	-3.26421	0.00605791	TRUE	FALSE	TRUE	FALSE	BosSINEL	-	4
ctg2-30724101-30724310	62.2714	67.7367	55.6721	12.0646	0.00038477	0.0194558	CSRNP3	7.17798	-2.87086	0.0117417	TRUE	FALSE	TRUE	FALSE	BosSINE2	-	4
ctg2-31145307-31145574	73.5107	78.4159	67.5419	10.874	0.00307205	0.0476466	SCN3A	24.4912	1.26841	0.0186873	TRUE	FALSE	TRUE	FALSE	BosSINEL	-	7
ctg2-31452624-31452832	77.7677	83.343	70.9058	12.4372	4.62101e-05	0.0113782	COBLL1	791.311	-3.36623	0.000121846	TRUE	FALSE	TRUE	FALSE	BosSINE2	-	4
ctg2-34086372-34086686	88.95	94.7881	81.8029	12.9852	0.000858436	0.026256	GCA	32.5236	1.11011	0.0192883	TRUE	FALSE	TRUE	FALSE	BosSINE1	-	4
ctg2-34136510-34136720	52.0957	38.9948	68.641	-29.6462	0.00298141	0.0468558	IFIH1	1382.01	1.84845	0.000189489	TRUE	FALSE	TRUE	FALSE	BosSINE2	-	3
ctg2-34238861-34239053	69.9856	84.4667	52.1628	32.3038	0.00108524	0.0293547	FAP	23.6421	3.52354	0.000102853	TRUE	FALSE	TRUE	FALSE	BosSINE3	+	3
ctg2-36224426-36224657	89.3666	95.1575	82.2392	12.9183	0.000126017	0.013894	ITGB6	324.574	-2.48439	2.14e-05	TRUE	FALSE	TRUE	FALSE	BosSINE2	-	5
ctg2-36491431-36491705	88.6186	96.0926	79.3244	16.7682	0.000148393	0.0148443	LY75	1825.17	1.2341	0.000745603	TRUE	FALSE	TRUE	FALSE	BosSINEL	+	9
ctg2-44756771-44756941	47.7292	38.3921	59.2659	-20.8738	0.000126017	0.013894	TNFAIP6	281.919	2.75166	0.00107797	TRUE	FALSE	TRUE	FALSE	BosSINEL	-	6
ctg2-47357262-47357480	83.5431	92.9367	71.9817	20.955	0.0017112	0.0363949	KIF5C	22.3359	-2.10279	0.0076891	TRUE	FALSE	TRUE	FALSE	BosSINE2	+	4
ctg2-52289316-52289590	42.1707	33.5464	52.7853	-19.2389	0.000580014	0.0224556	ZEB2	588.615	1.49025	0.00549399	TRUE	FALSE	TRUE	FALSE	BosSINEL	-	6
ctg2-53435299-53435522	86.728	92.8863	79.803	13.0833	7.42742e-05	0.0124599	ARHGAP15	560.761	1.1629	0.0110142	TRUE	FALSE	TRUE	FALSE	BosSINE3	-	5
ctg2-53859804-53860077	22.8962	14.7826	32.4564	-17.6738	0.000580014	0.0224556	KYNU	149.588	1.06367	0.0275013	TRUE	FALSE	FALSE	TRUE	BosSINEL	-	5
ctg2-62266451-62266671	86.1802	95.8382	74.1319	21.7063	5.46107e-05	0.011619	MAP3K19	6.58467	-3.813	0.011705	TRUE	FALSE	TRUE	FALSE	BosSINE2	+	7
ctg2-62300668-62300943	78.4512	83.0209	72.9087	10.1122	0.00103778	0.0285926	MAP3K19	6.58467	-3.813	0.011705	TRUE	FALSE	TRUE	FALSE	BosSINEL	+	8
ctg2-63491173-63491446	85.7833	90.6373	79.8665	10.7708	0.00212864	0.0396247	LOC112442684	1.62466	-3.27754	0.0304402	TRUE	FALSE	TRUE	FALSE	BosSINEL	-	7
ctg2-63987384-63987500	83.7514	94.5135	70.1543	24.3593	0.000991155	0.0285926	NCKAP5	9.97796	-4.78635	0.000244611	TRUE	FALSE	TRUE	FALSE	BosSINE2	+	3
ctg2-64877998-64878262	83.151	88.5828	76.2071	12.3757	0.000473624	0.0209513	LYPD1	6.07223	-2.8875	0.0111185	TRUE	FALSE	TRUE	FALSE	BosSINEL	-	5
ctg2-79813254-79813393	62.1448	56.5083	69.0821	-12.5737	0.000707298	0.0243453	MYO1B	80.7223	-1.61498	0.000821045	TRUE	FALSE	TRUE	FALSE	BosSINE5	+	3
ctg2-85974223-85974497	84.0988	91.0384	75.8217	15.2167	0.000473624	0.0209513	SF3B1	10535.1	1.14361	0.00209181	TRUE	FALSE	TRUE	FALSE	BosSINEL	-	6
ctg2-86103367-86103561	83.5011	93.401	71.3167	22.0844	0.00298141	0.0468558	RFTN2	72.8501	-3.19499	0.000555945	TRUE	FALSE	TRUE	FALSE	BosSINE1	-	3
ctg2-88882875-88883098	77.5957	91.3751	60.4234	30.9517	0.00038477	0.0194558	SPATS2L	242.853	-1.96815	4.36e-05	TRUE	FALSE	TRUE	FALSE	BosSINE2	+	5
ctg2-88904737-88905051	87.7118	94.0206	80.7594	13.2612	2.67594e-05	0.0103792	SPATS2L	242.853	-1.96815	4.36e-05	TRUE	FALSE	TRUE	FALSE	BosSINE1	-	5
ctg2-88915487-88915703	84.6161	95.0031	71.8321	23.1711	0.000295004	0.0180281	SPATS2L	242.853	-1.96815	4.36e-05	TRUE	FALSE	TRUE	FALSE	BosSINE2	+	3
ctg2-89117640-89117774	90.3841	97.7862	81.4	16.3863	0.000152041	0.0148443	AOX1	42.1381	-3.02402	0.0012536	TRUE	FALSE	TRUE	FALSE	BosSINEL	+	5
ctg2-89146362-89146586	85.7326	90.9904	79.5415	11.4489	0.000200254	0.0158399	AOX1	42.1381	-3.02402	0.0012536	TRUE	FALSE	TRUE	FALSE	BosSINE2	-	5
ctg2-90655252-90655466	83.9787	91.1917	75.1013	16.0904	0.00038477	0.0194558	KIAA2012	9.92868	-3.85904	0.00116634	TRUE	FALSE	TRUE	FALSE	BosSINE2	-	3
ctg2-90676480-90676607	78.3741	91.2662	63.1207	28.1455	1.27763e-05	0.0093863	KIAA2012	9.92868	-3.85904	0.00116634	TRUE	FALSE	TRUE	FALSE	BosSINEL	+	6
ctg2-90731662-90731793	37.5511	30.4438	46.2987	-15.855	0.00124915	0.0309714	KIAA2012	9.92868	-3.85904	0.00116634	TRUE	FALSE	TRUE	FALSE	BosSINEL	+	3
ctg2-92072382-92072601	55.1837	45.902	66.3115	-20.4095	0.000707298	0.0243453	CTLA4	55.967	1.16506	0.0495435	TRUE	TRUE	FALSE	FALSE	BosSINE3	+	4
ctg2-92927697-92927776	81.7577	90.1596	71.1744	18.9853	0.00171346	0.0363949	PARD3B	90.3874	-2.59678	0.000220845	TRUE	FALSE	TRUE	FALSE	BosSINE3	-	4
ctg2-93958514-93958708	78.6185	85.5327	70.1946	15.3381	0.00198806	0.0394187	PARD3B	90.3874	-2.59678	0.000220845	TRUE	TRUE	FALSE	FALSE	BosSINE3	-	5
ctg2-96445019-96445239	83.5075	92.5521	72.3756	20.1764	0.000250089	0.0167908	C2H2orf80	83.1903	-8.57336	1.28e-07	TRUE	FALSE	TRUE	FALSE	BosSINE2	-	3
ctg2-96526522-96526650	82.5259	90.1321	73.2951	16.837	4.62101e-05	0.0113782	IDH1	3700.83	-3.00659	3.71e-05	TRUE	FALSE	TRUE	FALSE	BosSINEL	+	7
ctg2-96528258-96528462	87.8915	96.0897	78.5	17.5897	0.000924575	0.0278673	IDH1	3700.83	-3.00659	3.71e-05	TRUE	FALSE	TRUE	FALSE	BosSINE2	-	4
ctg2-96529657-96529919	72.4705	83.6642	59.4869	24.1773	0.00149782	0.0334817	IDH1	3700.83	-3.00659	3.71e-05	TRUE	FALSE	TRUE	FALSE	BosSINEL	-	6
ctg2-97966289-97966499	57.3221	62.2427	51.1218	11.1209	0.000488955	0.0212516	KANSL1L	321.48	-1.3822	0.0179433	TRUE	FALSE	TRUE	FALSE	BosSINE3	-	3
ctg2-98029661-98029785	84.9753	92.2327	75.6599	16.5728	0.000200254	0.0158399	ACADL	4.80431	-4.43968	0.00149061	TRUE	FALSE	FALSE	TRUE	BosSINE2	-	5
ctg20-10091169-10091349	22.2933	27.5132	15.9393	11.5738	3.52765e-05	0.0107934	SERF1A	7.09867	-3.09281	0.000369524	TRUE	FALSE	FALSE	TRUE	BosSINE1	+	8
ctg20-10091257-10091363	23.7937	29.6442	16.5634	13.0809	0.000580014	0.0224556	SERF1A	7.09867	-3.09281	0.000369524	TRUE	FALSE	FALSE	TRUE	BosSINEL	+	6
ctg20-12473450-12473664	84.8362	80.3161	90.3994	-10.0832	5.9973e-05	0.011619	MAST4	353.167	-1.61934	0.0128728	TRUE	FALSE	TRUE	FALSE	BosSINE3	+	6
ctg20-12477615-12477763	76.2792	66.9212	88.5073	-21.5861	1.97454e-06	0.00754262	MAST4	353.167	-1.61934	0.0128728	TRUE	FALSE	TRUE	FALSE	BosSINE1	+	3
ctg20-12581438-12581632	82.8283	93.2889	70.149	23.1399	0.00252352	0.0430208	MAST4	353.167	-1.61934	0.0128728	TRUE	FALSE	TRUE	FALSE	BosSINE3	+	4
ctg20-12583525-12583743	86.7345	92.0979	80.2985	11.7994	1.09926e-05	0.00901759	MAST4	353.167	-1.61934	0.0128728	TRUE	FALSE	TRUE	FALSE	BosSINE2	-	5
ctg20-12595879-12596106	78.0684	85.874	68.4615	17.4124	0.00298141	0.0468558	MAST4	353.167	-1.61934	0.0128728	TRUE	FALSE	TRUE	FALSE	BosSINE3	+	3
ctg20-12783934-12784154	81.7718	87.8021	74.35	13.4521	0.000580014	0.0224556	MAST4	353.167	-1.61934	0.0128728	TRUE	FALSE	TRUE	FALSE	BosSINE2	-	3
ctg20-12831521-12831648	83.2323	78.9718	89.0148	-10.0431	0.000858483	0.026256	MAST4	353.167	-1.61934	0.0128728	TRUE	FALSE	TRUE	FALSE	BosSINE2	+	5
ctg20-12931979-12932115	87.8633	93.6127	81.0705	12.5422	0.000858483	0.026256	MAST4	353.167	-1.61934	0.0128728	TRUE	FALSE	TRUE	FALSE	BosSINEL	-	4
ctg20-13036095-13036221	82.1219	88.7242	73.8507	14.8735	0.00212864	0.0396247	MAST4	353.167	-1.61934	0.0128728	TRUE	FALSE	TRUE	FALSE	BosSINE6	-	3
ctg20-15254398-15254568	69.1857	76.9013	59.8717	17.0297	0.00178879	0.0363949	RNF180	4.45737	-2.50988	0.03138	TRUE	FALSE	TRUE	FALSE	BosSINE1	-	3
ctg20-20810266-20810375	28.7277	13.3093	48.3701	-35.0608	4.62101e-05	0.0113782	GAPT	815.32	1.90292	0.00320829	TRUE	FALSE	TRUE	FALSE	BosSINEL	-	5
ctg20-23339791-23339898	88.5228	93.8088	82.0169	11.7918	0.00212864	0.0396247	IL31RA	17.6559	-4.23467	0.000141961	TRUE	FALSE	TRUE	FALSE	BosSINE2	-	5
ctg20-24551033-24551248	80.2271	94.844	63.0005	31.8435	0.000262583	0.0175662	SNX18	4320.7	1.51523	0.0026431	TRUE	FALSE	TRUE	FALSE	BosSINE3	-	3
ctg20-24551868-24552086	87.5297	94.005	79.56	14.445	0.000707298	0.0243453	SNX18	4320.7	1.51523	0.0026431	TRUE	FALSE	TRUE	FALSE	BosSINE2	+	5
ctg20-24561031-24561247	68.9241	78.7917	56.5032	22.2885	0.000126017	0.013894	SNX18	4320.7	1.51523	0.0026431	TRUE	FALSE	TRUE	FALSE	BosSINE3	+	3
ctg20-24824934-24825162	51.2432	43.9417	60.2782	-16.3365	0.000676282	0.0243453	ARL15	277.119	-1.99178	0.00118871	TRUE	FALSE	TRUE	FALSE	BosSINE2	+	3
ctg20-2683512-2683741	82.1563	90.0599	73.3807	16.6792	0.00252352	0.0430208	GABRP	68.3018	-3.66634	6.27e-06	TRUE	FALSE	TRUE	FALSE	BosSINEL	-	8
ctg20-31398965-31399109	85.9035	92.3984	77.5588	14.8396	0.00214001	0.0396247	CCL28	33.218	-3.45599	0.00115761	TRUE	FALSE	TRUE	FALSE	BosSINE3	+	4
ctg20-32669015-32669229	46.3271	52.1478	39.1632	12.9846	2.67594e-05	0.0103792	OXCT1	734.455	-1.01322	0.00566928	TRUE	FALSE	TRUE	FALSE	BosSINE2	-	7
ctg20-32806817-32807029	42.5055	27.9274	59.5088	-31.5814	0.000858483	0.026256	OXCT1	734.455	-1.01322	0.00566928	TRUE	FALSE	TRUE	FALSE	BosSINE3	+	3
ctg20-33718912-33719134	80.1218	91.7672	65.304	26.4632	0.000473624	0.0209513	TTC33	274.053	1.10244	0.0138364	TRUE	FALSE	TRUE	FALSE	BosSINE2	+	4
ctg20-35209460-35209592	82.3328	95.018	66.7202	28.2978	9.46667e-05	0.0132745	FYB1	2880.3	1.64295	0.000429606	TRUE	FALSE	TRUE	FALSE	BosSINEL	-	4
ctg20-35269214-35269429	90.0894	94.9488	84.2048	10.744	0.000707298	0.0243453	FYB1	2880.3	1.64295	0.000429606	TRUE	FALSE	TRUE	FALSE	BosSINE2	-	4
ctg20-36237574-36237794	88.4237	93.5508	82.1135	11.4373	0.00247324	0.0430208	EGFLAM	5.5144	-7.70893	0.000367435	TRUE	FALSE	TRUE	FALSE	BosSINE2	+	4
ctg20-36315249-36315381	65.7792	73.4506	56.1746	17.276	5.9973e-05	0.011619	EGFLAM	5.5144	-7.70893	0.000367435	TRUE	FALSE	TRUE	FALSE	BosSINEL	+	5
ctg20-39035182-39035388	84.354	89.5458	78.3441	11.2017	0.000200254	0.0158399	PRLR	609.983	-2.97012	0.000233295	TRUE	FALSE	TRUE	FALSE	BosSINE3	+	3
ctg20-39036698-39036880	67.9426	80.131	53.7429	26.388	2.00696e-05	0.0097305	PRLR	609.983	-2.97012	0.000233295	TRUE	FALSE	TRUE	FALSE	BosSINE2	+	3
ctg20-39309311-39309434	88.9155	96.3896	79.7167	16.6729	0.000161763	0.0150402	LOC112443006	6.4814	-2.29689	0.0335431	TRUE	FALSE	TRUE	FALSE	BosSINE2	+	3
ctg20-39452955-39453226	83.1187	91.9907	72.2256	19.765	0.00149782	0.0334817	RAI14	339.067	-1.92835	8.55e-06	TRUE	FALSE	TRUE	FALSE	BosSINEL	-	10
ctg20-39468735-39468995	74.1132	81.7519	64.2957	17.4563	1.49417e-05	0.0093863	RAI14	339.067	-1.92835	8.55e-06	TRUE	FALSE	TRUE	FALSE	BosSINEL	-	5
ctg20-41642177-41642449	80.4539	90.6863	67.4645	23.2219	0.00108524	0.0293547	PDZD2	63.7669	-2.45387	0.000104242	TRUE	FALSE	TRUE	FALSE	BosSINEL	+	3
ctg20-41718576-41718788	81.5121	90.4562	70.5038	19.9524	0.00229391	0.0418835	PDZD2	63.7669	-2.45387	0.000104242	TRUE	FALSE	TRUE	FALSE	BosSINE3	-	3
ctg20-56248698-56248907	78.5502	85.5992	69.8745	15.7247	0.00124915	0.0309714	MYO10	262.754	-1.84877	0.00111462	TRUE	FALSE	TRUE	FALSE	BosSINE2	+	8
ctg20-56263120-56263334	76.8817	85.1354	66.5222	18.6131	5.9973e-05	0.011619	MYO10	262.754	-1.84877	0.00111462	TRUE	FALSE	TRUE	FALSE	BosSINE3	+	4
ctg20-56614651-56614841	78.8468	88.9732	66.7095	22.2638	0.00092863	0.0278673	RETREG1	847.356	-2.34374	0.00112675	TRUE	FALSE	TRUE	FALSE	BosSINE3	+	4
ctg20-56638736-56639029	79.4696	88.3506	68.0019	20.3487	5.9973e-05	0.011619	RETREG1	847.356	-2.34374	0.00112675	TRUE	FALSE	TRUE	FALSE	BosSINE1	-	3
ctg20-57582083-57582292	82.719	88.0019	76.1872	11.8147	0.000311152	0.0180281	FBXL7	14.4415	-1.72935	0.015961	TRUE	FALSE	TRUE	FALSE	BosSINE3	+	5
ctg20-59177600-59177825	86.3585	91.2653	80.3878	10.8775	0.000473624	0.0209513	DNAH5	6.5255	-4.16248	1.44e-05	TRUE	FALSE	TRUE	FALSE	BosSINE2	-	5
ctg20-61224519-61224782	34.5885	24.2999	47.0985	-22.7986	0.00298141	0.0468558	CTNND2	3.76906	-3.98349	0.0024101	TRUE	FALSE	TRUE	FALSE	BosSINEL	-	5
ctg20-61335234-61335509	83.4864	87.9183	77.8663	10.052	9.90217e-05	0.0132745	CTNND2	3.76906	-3.98349	0.0024101	TRUE	FALSE	TRUE	FALSE	BosSINEL	-	6
ctg20-61701482-61701694	84.6907	89.958	78.2038	11.7542	0.00126597	0.0309714	CTNND2	3.76906	-3.98349	0.0024101	TRUE	FALSE	TRUE	FALSE	BosSINE3	+	5
ctg20-61926951-61927160	90.6058	95.207	85.0188	10.1881	0.00252352	0.0430208	CTNND2	3.76906	-3.98349	0.0024101	TRUE	FALSE	TRUE	FALSE	BosSINE2	-	5
ctg20-61937787-61938012	80.6861	88.7799	70.9286	17.8513	0.00252352	0.0430208	CTNND2	3.76906	-3.98349	0.0024101	TRUE	FALSE	TRUE	FALSE	BosSINE3	-	4
ctg20-62516665-62516888	9.53319	2.77813	17.8471	-15.069	0.000135296	0.014822	DAP	2333.27	-1.03719	0.0013855	TRUE	FALSE	TRUE	FALSE	BosSINE2	+	4
ctg20-62634728-62634937	77.6119	91.8267	59.7221	32.1046	0.00149782	0.0334817	ANKRD33B	698.21	1.21992	0.00999232	TRUE	FALSE	TRUE	FALSE	BosSINE3	-	6
ctg20-62670991-62671200	68.5443	61.8805	76.4882	-14.6078	0.000359381	0.0194558	ANKRD33B	698.21	1.21992	0.00999232	TRUE	FALSE	TRUE	FALSE	BosSINE3	-	3
ctg20-62677263-62677439	23.4983	10.6297	39.5196	-28.8898	0.00214001	0.0396247	ANKRD33B	698.21	1.21992	0.00999232	TRUE	FALSE	TRUE	FALSE	BosSINEL	+	6
ctg20-62679510-62679719	50.2348	39.8946	62.8192	-22.9246	0.000473624	0.0209513	ANKRD33B	698.21	1.21992	0.00999232	TRUE	FALSE	TRUE	FALSE	BosSINE3	-	4
ctg20-62697496-62697610	10.319	2.64375	19.7654	-17.1216	0.000318441	0.0183997	ANKRD33B	698.21	1.21992	0.00999232	TRUE	FALSE	TRUE	FALSE	BosSINE6	+	3
ctg20-64208671-64208826	68.454	75.5438	59.1194	16.4244	0.000707298	0.0243453	SEMA5A	19.4517	-3.63062	7.19e-07	TRUE	FALSE	TRUE	FALSE	BosSINE1	-	4
ctg20-65674430-65674546	79.5348	89.4489	68.176	21.2728	9.90217e-05	0.0132745	ADCY2	4.3566	-3.3861	0.00418906	TRUE	FALSE	TRUE	FALSE	BosSINE2	+	7
ctg20-65793088-65793314	77.5732	85.3589	67.4816	17.8772	0.000210536	0.0163489	ADCY2	4.3566	-3.3861	0.00418906	TRUE	FALSE	TRUE	FALSE	BosSINE2	-	6
ctg20-7713016-7713290	76.9152	89.6462	63.6496	25.9966	0.000139575	0.0148443	ARHGEF28	88.715	-3.07405	4.63e-08	TRUE	FALSE	TRUE	FALSE	BosSINEL	-	12
ctg20-7983860-7984133	88.3112	93.9364	81.0476	12.8887	5.9973e-05	0.011619	ARHGEF28	88.715	-3.07405	4.63e-08	TRUE	FALSE	TRUE	FALSE	BosSINEL	-	6
ctg21-12801926-12802133	91.4968	96.4736	85.4786	10.995	0.000998338	0.0285926	MCTP2	798.389	3.2148	1.96e-06	TRUE	FALSE	TRUE	FALSE	BosSINE3	+	6
ctg21-13983120-13983341	50.9779	60.7641	38.8279	21.9362	3.52765e-05	0.0107934	RGMA	24.7665	-3.49758	0.000582178	TRUE	FALSE	TRUE	FALSE	BosSINE2	+	4
ctg21-14009732-14009880	72.25	78.0427	65.1205	12.9222	4.62101e-05	0.0113782	RGMA	24.7665	-3.49758	0.000582178	TRUE	FALSE	TRUE	FALSE	BosSINE2	+	3
ctg21-14024398-14024596	81.504	91.8754	68.5793	23.2961	0.000580014	0.0224556	RGMA	24.7665	-3.49758	0.000582178	TRUE	FALSE	TRUE	FALSE	BosSINE2	+	8
ctg21-16320280-16320499	88.4617	95.4855	79.866	15.6195	0.00149782	0.0334817	AKAP13	10305	1.2389	0.00122946	TRUE	FALSE	TRUE	FALSE	BosSINE2	+	12
ctg21-16337666-16337783	79.3607	86.4885	69.8569	16.6316	5.92339e-05	0.011619	AKAP13	10305	1.2389	0.00122946	TRUE	FALSE	TRUE	FALSE	BosSINE6	+	3
ctg21-16376749-16376970	74.4364	86.7648	59.5577	27.2072	0.00124915	0.0309714	AKAP13	10305	1.2389	0.00122946	TRUE	FALSE	TRUE	FALSE	BosSINE2	+	4
ctg21-16405714-16405785	87.0431	96.2833	75.6705	20.6128	0.000192337	0.0158399	AKAP13	10305	1.2389	0.00122946	TRUE	FALSE	TRUE	FALSE	BosSINE3	-	3
ctg21-16406357-16406561	83.8388	95.172	70.0301	25.1419	0.00178879	0.0363949	AKAP13	10305	1.2389	0.00122946	TRUE	FALSE	TRUE	FALSE	BosSINE1	+	6
ctg21-16421440-16421655	75.001	81.1256	67.4631	13.6625	0.00298141	0.0468558	AKAP13	10305	1.2389	0.00122946	TRUE	FALSE	TRUE	FALSE	BosSINE3	-	5
ctg21-16501331-16501460	75.6814	82.09	67.7938	14.2962	0.00038477	0.0194558	AKAP13	10305	1.2389	0.00122946	TRUE	FALSE	TRUE	FALSE	BosSINE2	-	5
ctg21-16582883-16582955	83.3399	93.1458	71.2712	21.8747	0.00298141	0.0468558	KLHL25	31.4067	-1.3771	0.00454549	TRUE	FALSE	TRUE	FALSE	BosSINE3	+	6
ctg21-18843290-18843504	40.6701	47.2632	32.5527	14.7105	0.000473624	0.0209513	NTRK3	3.8724	-2.24365	0.0316503	TRUE	FALSE	TRUE	FALSE	BosSINE3	+	4
ctg21-18854896-18854975	81.1154	92.4635	66.3465	26.1171	0.000200254	0.0158399	NTRK3	3.8724	-2.24365	0.0316503	TRUE	FALSE	TRUE	FALSE	BosSINE3	-	3
ctg21-19125066-19125243	78.1712	87.601	66.2524	21.3487	0.000580014	0.0224556	NTRK3	3.8724	-2.24365	0.0316503	TRUE	FALSE	TRUE	FALSE	BosSINE2	-	4
ctg21-19185838-19186054	81.9383	90.1476	71.6014	18.5462	4.62101e-05	0.0113782	NTRK3	3.8724	-2.24365	0.0316503	TRUE	FALSE	TRUE	FALSE	BosSINE3	+	6
ctg21-19202979-19203090	20.6658	7.22474	36.9279	-29.7031	0.000135813	0.0148443	NTRK3	3.8724	-2.24365	0.0316503	TRUE	FALSE	TRUE	FALSE	BosSINE6	+	4
ctg21-20475313-20475518	80.9616	88.2188	72.3974	15.8213	0.00212864	0.0396247	MFGE8	4690.39	-3.49936	8.78e-05	TRUE	FALSE	TRUE	FALSE	BosSINE3	+	3
ctg21-21675609-21675740	53.7772	59.5015	46.8968	12.6047	0.000126017	0.013894	PRC1	136.598	-1.06687	0.033111	TRUE	FALSE	FALSE	TRUE	BosSINE3	+	5
ctg21-21675739-21675873	50.3554	56.3649	42.6254	13.7395	0.000473624	0.0209513	PRC1	136.598	-1.06687	0.033111	TRUE	FALSE	FALSE	TRUE	BosSINEL	-	5
ctg21-21731899-21732171	63.382	74.0657	50.5942	23.4715	0.00149782	0.0334817	HDDC3	56.0207	-1.09319	7.74e-05	TRUE	FALSE	FALSE	TRUE	BosSINEL	+	8
ctg21-22507473-22507650	73.8707	84.1083	61.2705	22.8378	0.000311152	0.0180281	ALPK3	253.968	1.01195	0.00726177	TRUE	FALSE	TRUE	FALSE	BosSINE1	-	3
ctg21-23134371-23134480	56.2845	46.1156	68.0179	-21.9024	0.00263206	0.0446486	HOMER2	107.58	-2.66402	0.000265888	TRUE	FALSE	TRUE	FALSE	BosSINE6	+	3
ctg21-24275753-24276018	60.6054	55.1842	67.2772	-12.0929	3.53649e-07	0.00754262	ADAMTSL3	3.87612	-3.21658	0.00169211	TRUE	FALSE	TRUE	FALSE	BosSINEL	+	10
ctg21-24484061-24484237	76.9293	84.9151	67.1006	17.8145	2.67594e-05	0.0103792	ADAMTSL3	3.87612	-3.21658	0.00169211	TRUE	FALSE	TRUE	FALSE	BosSINE3	+	6
ctg21-26134284-26134617	78.3473	90.3897	63.8492	26.5404	0.00212864	0.0396247	FAH	232.071	-1.22474	0.00786248	TRUE	FALSE	TRUE	FALSE	BosSINE1	-	4
ctg21-26134675-26134804	77.0552	90.4771	60.5359	29.9412	0.000200254	0.0158399	FAH	232.071	-1.22474	0.00786248	TRUE	FALSE	TRUE	FALSE	BosSINE6	-	3
ctg21-26274806-26275004	73.5528	78.7054	67.117	11.5884	0.000250089	0.0167908	ARNT2	8.12594	-2.60514	0.00619417	TRUE	FALSE	TRUE	FALSE	BosSINE3	+	7
ctg21-26289186-26289386	81.5568	86.3887	75.5968	10.7919	9.48551e-05	0.0132745	ARNT2	8.12594	-2.60514	0.00619417	TRUE	FALSE	TRUE	FALSE	BosSINE2	-	3
ctg21-26336483-26336692	82.1633	88.0891	74.7326	13.3565	0.00298141	0.0468558	ARNT2	8.12594	-2.60514	0.00619417	TRUE	FALSE	TRUE	FALSE	BosSINE2	-	4
ctg21-26369275-26369459	82.267	89.3701	73.7229	15.6471	0.000707298	0.0243453	ARNT2	8.12594	-2.60514	0.00619417	TRUE	FALSE	TRUE	FALSE	BosSINE3	-	4
ctg21-26546227-26546439	78.3437	91.6469	61.9705	29.6764	3.52765e-05	0.0107934	ABHD17C	72.4519	-3.03619	1.03e-05	TRUE	FALSE	FALSE	TRUE	BosSINE3	-	3
ctg21-28490547-28490740	76.4527	83.0624	68.3802	14.6823	0.000580014	0.0224556	TJP1	405.466	-2.81596	1.34e-05	TRUE	FALSE	TRUE	FALSE	BosSINE2	-	4
ctg21-289638-289809	84.7708	89.6804	78.7587	10.9218	0.00252352	0.0430208	LOC112443201	68.9309	2.44243	0.024708	TRUE	FALSE	FALSE	TRUE	BosSINE3	-	4
ctg21-31396351-31396553	73.0978	85.4398	57.9077	27.5322	2.67594e-05	0.0103792	TMEM266	11.4179	-5.98183	9.38e-06	TRUE	FALSE	TRUE	FALSE	BosSINE3	+	4
ctg21-32139447-32139666	77.6794	88.1713	64.0333	24.138	1.32618e-06	0.00754262	PSTPIP1	414.491	1.23847	0.00564525	TRUE	FALSE	TRUE	FALSE	BosSINE2	-	5
ctg21-35059533-35059662	85.2467	92.1728	77.6429	14.53	0.0017067	0.0363949	STXBP6	222.56	-1.33424	0.000748698	TRUE	FALSE	TRUE	FALSE	BosSINEL	+	7
ctg21-40224683-40224879	84.0287	89.4927	77.3038	12.1889	0.00252352	0.0430208	PRKD1	35.6493	-3.64614	0.000869785	TRUE	FALSE	TRUE	FALSE	BosSINE3	+	3
ctg21-4062434-4062653	81.294	87.9255	73.7203	14.2052	0.00212864	0.0396247	GABRB3	4.0047	-7.56063	0.000132023	TRUE	FALSE	TRUE	FALSE	BosSINE2	-	3
ctg21-4111649-4111919	72.3932	77.3515	66.2763	11.0752	0.000250236	0.0167908	GABRB3	4.0047	-7.56063	0.000132023	TRUE	FALSE	TRUE	FALSE	BosSINEL	+	5
ctg21-42828525-42828681	90.4745	95.6856	84.0608	11.6249	0.000414629	0.0205211	AKAP6	121.126	-1.07017	0.043128	TRUE	FALSE	TRUE	FALSE	BosSINEL	+	5
ctg21-43098018-43098231	73.0238	79.6072	65.0989	14.5083	0.000311152	0.0180281	AKAP6	121.126	-1.07017	0.043128	TRUE	FALSE	TRUE	FALSE	BosSINE2	+	7
ctg21-46977927-46978127	62.9486	54.8813	73.6994	-18.8181	0.00038477	0.0194558	SLC25A21	22.3436	-5.16333	0.000238151	TRUE	FALSE	TRUE	FALSE	BosSINE3	+	3
ctg21-47026969-47027106	88.4989	93.121	82.5264	10.5946	0.00235655	0.0428105	SLC25A21	22.3436	-5.16333	0.000238151	TRUE	FALSE	TRUE	FALSE	BosSINE2	-	3
ctg21-47326503-47326777	83.0905	88.4891	76.627	11.8621	0.00038477	0.0194558	SLC25A21	22.3436	-5.16333	0.000238151	TRUE	FALSE	TRUE	FALSE	BosSINEL	+	9
ctg21-5303517-5303729	88.1292	95.3799	79.2534	16.1265	0.00024877	0.0167908	CHSY1	1228.29	1.22887	0.00681188	TRUE	FALSE	TRUE	FALSE	BosSINE3	+	8
ctg21-56531884-56532151	35.5103	40.5929	29.0845	11.5085	0.00252352	0.0430208	TC2N	259.542	-2.94441	0.000199823	TRUE	FALSE	FALSE	TRUE	BosSINEL	+	8
ctg21-56532425-56532618	83.9713	92.8052	72.584	20.2212	0.00198806	0.0394187	TC2N	259.542	-2.94441	0.000199823	TRUE	FALSE	FALSE	TRUE	BosSINE3	+	3
ctg21-60167794-60168018	81.4763	92.0855	68.1303	23.9552	0.00015926	0.0148443	CLMN	1676.12	-4.92149	3.65e-07	TRUE	FALSE	TRUE	FALSE	BosSINE2	+	4
ctg21-60169316-60169533	78.3216	90.525	63.3019	27.2231	0.000200254	0.0158399	CLMN	1676.12	-4.92149	3.65e-07	TRUE	FALSE	TRUE	FALSE	BosSINE2	+	4
ctg21-60170077-60170279	83.9025	93.7027	71.5876	22.1152	2.85866e-06	0.00818994	CLMN	1676.12	-4.92149	3.65e-07	TRUE	FALSE	TRUE	FALSE	BosSINE2	-	5
ctg21-64537758-64537925	51.975	47.3891	57.6192	-10.2302	0.00178879	0.0363949	CCDC85C	52.2808	-3.03616	0.000263612	TRUE	FALSE	TRUE	FALSE	BosSINEL	-	6
ctg21-64667207-64667409	77.3125	87.5592	65.3087	22.2506	0.00149782	0.0334817	CYP46A1	2.29785	-19.9505	2.27e-12	TRUE	FALSE	FALSE	TRUE	BosSINE2	+	4
ctg21-64793750-64793933	77.2583	83.5795	68.847	14.7325	0.00124915	0.0309714	EML1	16.6248	-3.27202	0.00192222	TRUE	FALSE	TRUE	FALSE	BosSINE3	+	4
ctg21-6657354-6657553	73.9218	82.5026	63.8308	18.6718	0.00252352	0.0430208	ADAMTS17	12.6054	-1.82586	0.0264035	TRUE	FALSE	TRUE	FALSE	BosSINE2	-	3
ctg21-7355042-7355238	82.515	93.2479	69.5365	23.7114	7.73607e-05	0.0124599	LRRC28	181.88	-1.45553	0.00119025	TRUE	FALSE	TRUE	FALSE	BosSINE1	-	4
ctg22-10106719-10106917	78.2911	88.4402	65.7577	22.6825	0.00015926	0.0148443	STAC	5.79799	-3.93085	0.0018023	TRUE	FALSE	TRUE	FALSE	BosSINE3	-	6
ctg22-1059131-1059405	73.859	83.1271	62.5192	20.6079	0.000707298	0.0243453	EGFR	116.754	-2.63901	0.000186851	TRUE	FALSE	TRUE	FALSE	BosSINEL	+	7
ctg22-10610815-10610936	80.0746	92.5717	65.6548	26.9169	0.000178462	0.0158399	TRANK1	3132.61	2.11631	5.24e-05	TRUE	FALSE	TRUE	FALSE	BosSINE5	+	4
ctg22-10666868-10666995	86.2271	94.4445	75.5611	18.8835	0.00212864	0.0396247	TRANK1	3132.61	2.11631	5.24e-05	TRUE	FALSE	TRUE	FALSE	BosSINE6	-	4
ctg22-11401388-11401516	88.5815	94.7169	81.0912	13.6256	0.0021373	0.0396247	CTDSPL	98.2282	-2.03027	0.000446134	TRUE	FALSE	TRUE	FALSE	BosSINE6	-	3
ctg22-11763183-11763312	88.1871	93.2693	82.1534	11.1159	0.000580014	0.0224556	SLC22A14	232.995	3.06818	0.000148084	TRUE	FALSE	TRUE	FALSE	BosSINE6	+	3
ctg22-11834061-11834249	55.3634	47.8111	64.7521	-16.941	0.00298141	0.0468558	ACVR2B	782.021	1.10388	0.0116716	TRUE	FALSE	TRUE	FALSE	BosSINE1	-	4
ctg22-11837514-11837718	85.938	93.1009	77.1904	15.9105	0.00147414	0.0334817	ACVR2B	782.021	1.10388	0.0116716	TRUE	FALSE	TRUE	FALSE	BosSINE2	+	4
ctg22-13924801-13924880	74.2658	67.893	82.6365	-14.7436	2.00696e-05	0.0097305	ULK4	100.353	-1.61034	0.00015256	TRUE	FALSE	TRUE	FALSE	BosSINE3	-	4
ctg22-13961432-13961707	85.7655	92.6101	77.384	15.2262	0.00015926	0.0148443	ULK4	100.353	-1.61034	0.00015256	TRUE	FALSE	TRUE	FALSE	BosSINEL	-	6
ctg22-13989048-13989253	85.7775	91.7303	78.6115	13.1187	0.000126017	0.013894	ULK4	100.353	-1.61034	0.00015256	TRUE	FALSE	TRUE	FALSE	BosSINE2	-	3
ctg22-21404448-21404507	78.6621	91.5531	62.7962	28.757	0.000858483	0.026256	BHLHE40	8684.84	1.47461	0.00743574	TRUE	FALSE	TRUE	FALSE	BosSINE3	+	3
ctg22-28171857-28171982	78.8424	86.8208	68.8757	17.9451	3.52765e-05	0.0107934	PDZRN3	10.0316	-1.89931	0.0173427	TRUE	FALSE	TRUE	FALSE	BosSINE6	-	3
ctg22-34984301-34984431	78.3391	86.5281	68.2603	18.2679	0.000473624	0.0209513	LRIG1	167.162	-1.35701	0.0317199	TRUE	FALSE	TRUE	FALSE	BosSINEL	+	3
ctg22-34997803-34998013	82.1591	88.6773	74.1365	14.5408	0.00212864	0.0396247	LRIG1	167.162	-1.35701	0.0317199	TRUE	FALSE	TRUE	FALSE	BosSINE3	-	4
ctg22-35474313-35474535	78.1472	86.3267	68.1868	18.1399	0.00298141	0.0468558	MAGI1	157.954	-2.11123	0.0014623	TRUE	FALSE	TRUE	FALSE	BosSINE2	-	5
ctg22-35484235-35484450	83.2052	88.7047	76.047	12.6577	0.000200254	0.0158399	MAGI1	157.954	-2.11123	0.0014623	TRUE	FALSE	TRUE	FALSE	BosSINE2	-	4
ctg22-35494098-35494376	83.4172	88.9625	76.5291	12.4334	7.73607e-05	0.0124599	MAGI1	157.954	-2.11123	0.0014623	TRUE	FALSE	TRUE	FALSE	BosSINEL	-	9
ctg22-36622356-36622489	77.5158	88.5429	63.6908	24.8522	0.000126017	0.013894	LOC101906240	3.7076	-3.00407	0.0354565	TRUE	FALSE	TRUE	FALSE	BosSINEL	+	5
ctg22-39245573-39245793	35.1569	25.4366	47.2026	-21.7659	0.000580014	0.0224556	PTPRG	151.26	-1.45579	0.00207874	TRUE	FALSE	TRUE	FALSE	BosSINE2	+	9
ctg22-39287677-39287874	84.4782	92.35	74.7897	17.5603	0.00286031	0.0468558	PTPRG	151.26	-1.45579	0.00207874	TRUE	FALSE	TRUE	FALSE	BosSINE3	-	3
ctg22-39342627-39342811	82.3828	93.0517	69.5087	23.5431	0.000250236	0.0167908	PTPRG	151.26	-1.45579	0.00207874	TRUE	FALSE	TRUE	FALSE	BosSINE3	+	4
ctg22-39418617-39418744	87.5373	93.1064	80.8282	12.2782	0.00015926	0.0148443	PTPRG	151.26	-1.45579	0.00207874	TRUE	FALSE	TRUE	FALSE	BosSINE6	-	3
ctg22-39451008-39451200	88.3274	94.5673	80.3943	14.173	0.000575562	0.0224556	PTPRG	151.26	-1.45579	0.00207874	TRUE	FALSE	TRUE	FALSE	BosSINE2	-	9
ctg22-39769475-39769682	78.5286	86.3482	69.4774	16.8708	0.00178879	0.0363949	PTPRG	151.26	-1.45579	0.00207874	TRUE	FALSE	TRUE	FALSE	BosSINE3	+	3
ctg22-4020748-4020937	72.8767	78.574	65.783	12.791	0.000200254	0.0158399	RBMS3	32.1924	-3.7861	0.00233955	TRUE	FALSE	TRUE	FALSE	BosSINE2	+	3
ctg22-42765776-42765906	32.0174	24.0351	42.0371	-18.002	0.00298141	0.0468558	FAM107A	415.037	-5.69962	9.76e-08	TRUE	FALSE	TRUE	FALSE	BosSINE6	+	5
ctg22-42783040-42783230	86.0293	92.0742	78.5894	13.4848	0.000473624	0.0209513	FAM107A	415.037	-5.69962	9.76e-08	TRUE	FALSE	TRUE	FALSE	BosSINE2	-	4
ctg22-42807905-42808107	60.2041	71.9732	46.1919	25.7813	0.00298141	0.0468558	FAM107A	415.037	-5.69962	9.76e-08	TRUE	FALSE	TRUE	FALSE	BosSINE2	+	9
ctg22-42992094-42992296	89.6044	96.9667	80.799	16.1677	0.00040182	0.0202233	PXK	1367.24	1.20373	0.00980998	TRUE	FALSE	TRUE	FALSE	BosSINE3	-	4
ctg22-47731339-47731555	80.8162	87.9944	71.9815	16.0128	0.00298141	0.0468558	LOC104975561	66.0379	1.68527	0.000518319	TRUE	TRUE	FALSE	FALSE	BosSINE3	-	5
ctg22-50419526-50419667	92.7087	98.0149	86.9695	11.0454	0.00178804	0.0363949	UBA7	734.798	1.8053	0.00066799	TRUE	FALSE	FALSE	TRUE	BosSINE1	+	3
ctg22-527434-527594	92.5489	97.5229	86.4269	11.096	0.00113977	0.0307747	VOPP1	101.167	-1.16593	0.0124921	TRUE	FALSE	TRUE	FALSE	BosSINE5	-	3
ctg22-52958506-52958709	87.5488	94.1067	79.8279	14.2788	0.000286255	0.0180281	LTF	5738.81	-1.79695	0.0341344	TRUE	FALSE	TRUE	FALSE	BosSINE3	+	5
ctg22-52980130-52980401	85.0633	90.9106	77.9663	12.9442	0.00124915	0.0309714	LTF	5738.81	-1.79695	0.0341344	TRUE	FALSE	TRUE	FALSE	BosSINEL	-	8
ctg22-53000622-53000807	63.4815	55.7586	72.9865	-17.2279	1.49417e-05	0.0093863	CCRL2	3304.84	2.57732	0.000120377	TRUE	FALSE	TRUE	FALSE	BosSINE1	+	4
ctg22-53050462-53050662	83.6961	93.2561	71.8895	21.3666	9.90217e-05	0.0132745	CCR2	791.225	1.15099	0.014102	TRUE	FALSE	FALSE	TRUE	BosSINE3	+	5
ctg22-54401456-54401715	64.173	74.4352	52.7624	21.6728	0.00263206	0.0446486	ATP2B2	39.6391	-1.52241	0.0119728	TRUE	FALSE	TRUE	FALSE	BosSINEL	+	3
ctg22-54567847-54568053	80.2771	89.2165	69.2509	19.9657	0.000707298	0.0243453	ATP2B2	39.6391	-1.52241	0.0119728	TRUE	FALSE	TRUE	FALSE	BosSINE3	-	3
ctg22-54674361-54674547	71.324	80.0229	60.2844	19.7385	0.00178879	0.0363949	ATP2B2	39.6391	-1.52241	0.0119728	TRUE	FALSE	TRUE	FALSE	BosSINE3	-	3
ctg22-54740259-54740456	81.0813	86.8712	73.7864	13.0848	0.00103778	0.0285926	ATP2B2	39.6391	-1.52241	0.0119728	TRUE	FALSE	TRUE	FALSE	BosSINE3	-	3
ctg22-56801533-56801757	92.7284	97.3977	86.9817	10.4159	0.000528092	0.0224556	PPARG-TSEN2	7.33725	3.71361	0.0482094	TRUE	FALSE	TRUE	FALSE	BosSINE2	-	4
ctg22-58766197-58766403	88.0428	92.8956	82.1109	10.7847	0.00015926	0.0148443	IQSEC1	1963.95	2.37416	2.39e-05	TRUE	FALSE	TRUE	FALSE	BosSINE2	+	4
ctg22-58785312-58785429	77.7224	88.8445	63.7176	25.1269	3.52765e-05	0.0107934	IQSEC1	1963.95	2.37416	2.39e-05	TRUE	FALSE	TRUE	FALSE	BosSINE6	-	4
ctg22-58801828-58801967	87.0328	94.4573	77.8949	16.5624	0.000707298	0.0243453	IQSEC1	1963.95	2.37416	2.39e-05	TRUE	FALSE	TRUE	FALSE	BosSINEL	+	3
ctg22-58815385-58815591	73.9259	84.5804	60.9396	23.6408	0.00178879	0.0363949	IQSEC1	1963.95	2.37416	2.39e-05	TRUE	FALSE	TRUE	FALSE	BosSINE3	+	7
ctg22-58824490-58824569	87.8031	96.6816	77.1346	19.547	0.000847085	0.026256	IQSEC1	1963.95	2.37416	2.39e-05	TRUE	FALSE	TRUE	FALSE	BosSINE3	-	3
ctg22-6497406-6497577	49.0693	53.7896	43.2785	10.5112	0.00178879	0.0363949	OSBPL10	107.012	-3.09757	9.07e-05	TRUE	FALSE	TRUE	FALSE	BosSINE3	+	5
ctg22-6595249-6595396	85.9594	92.825	76.4988	16.3262	0.00212864	0.0396247	GPD1L	154.662	-1.62615	0.00201397	TRUE	FALSE	TRUE	FALSE	BosSINE6	-	4
ctg22-6615294-6615498	85.9445	97.0792	70.8659	26.2133	0.00271407	0.0455041	GPD1L	154.662	-1.62615	0.00201397	TRUE	FALSE	TRUE	FALSE	BosSINE3	-	4
ctg22-6618624-6618823	89.6614	96.6381	81.0746	15.5635	0.000176916	0.0158399	GPD1L	154.662	-1.62615	0.00201397	TRUE	FALSE	TRUE	FALSE	BosSINE2	+	5
ctg22-6720778-6720914	88.7593	96.2814	79.3018	16.9796	0.00117183	0.0309714	CMTM8	28.8332	-3.7796	0.000782753	TRUE	FALSE	TRUE	FALSE	BosSINE2	-	4
ctg22-6720927-6721054	89.6094	95.1467	82.9934	12.1532	0.00315356	0.048749	CMTM8	28.8332	-3.7796	0.000782753	TRUE	FALSE	TRUE	FALSE	BosSINE6	-	4
ctg22-6722968-6723193	53.8308	59.062	47.5163	11.5457	0.00103778	0.0285926	CMTM8	28.8332	-3.7796	0.000782753	TRUE	FALSE	TRUE	FALSE	BosSINE2	-	4
ctg22-6784715-6784884	82.3797	95.393	66.3635	29.0295	2.67594e-05	0.0103792	CMTM8	28.8332	-3.7796	0.000782753	TRUE	FALSE	TRUE	FALSE	BosSINE1	+	4
ctg22-988861-989072	80.787	92.0314	67.8108	24.2205	0.000473624	0.0209513	EGFR	116.754	-2.63901	0.000186851	TRUE	FALSE	TRUE	FALSE	BosSINE2	-	5
ctg23-10060608-10060759	89.204	95.9938	80.8474	15.1463	0.000102814	0.0136341	MAPK13	199.328	-2.16372	0.00338719	TRUE	FALSE	TRUE	FALSE	BosSINE2	-	3
ctg23-10664828-10664915	79.3977	91.6021	64.3769	27.2252	0.000707298	0.0243453	CPNE5	38.2462	1.97121	0.00484937	TRUE	FALSE	TRUE	FALSE	BosSINE2	+	6
ctg23-10666634-10666828	85.6954	94.2328	75.1878	19.045	0.000311152	0.0180281	CPNE5	38.2462	1.97121	0.00484937	TRUE	FALSE	TRUE	FALSE	BosSINE3	+	6
ctg23-10681569-10681794	51.0134	41.1234	63.1856	-22.0621	0.00298141	0.0468558	CPNE5	38.2462	1.97121	0.00484937	TRUE	FALSE	TRUE	FALSE	BosSINE2	-	4
ctg23-10685237-10685449	75.0852	90.5119	57.2449	33.267	0.00108524	0.0293547	CPNE5	38.2462	1.97121	0.00484937	TRUE	FALSE	TRUE	FALSE	BosSINE3	-	5
ctg23-10686170-10686379	67.2345	75.2237	57.4015	17.8222	0.000126017	0.013894	CPNE5	38.2462	1.97121	0.00484937	TRUE	FALSE	TRUE	FALSE	BosSINE3	-	5
ctg23-13070805-13071007	79.76	87.6594	70.0377	17.6217	0.00212864	0.0396247	KCNK5	90.4196	-3.00924	4.19e-05	TRUE	FALSE	TRUE	FALSE	BosSINE3	+	5
ctg23-13076389-13076596	87.5303	94.4831	78.9731	15.51	1.09926e-05	0.00901759	KCNK5	90.4196	-3.00924	4.19e-05	TRUE	FALSE	TRUE	FALSE	BosSINE3	-	5
ctg23-13171735-13171886	82.2914	95.5259	67.5727	27.9531	0.00198855	0.0394263	KCNK17	17.2215	2.00396	0.0021001	TRUE	FALSE	TRUE	FALSE	BosSINE5	-	4
ctg23-13829084-13829212	83.5155	95.4354	67.6222	27.8132	0.000416854	0.0206258	DAAM2	11.2162	-4.45639	0.00212309	TRUE	FALSE	TRUE	FALSE	BosSINE3	-	3
ctg23-15147519-15147713	91.3615	97.2927	84.0615	13.2312	0.000481924	0.021234	TREM1	2301.86	1.94911	0.00291564	TRUE	FALSE	TRUE	FALSE	BosSINE3	+	3
ctg23-15847740-15848014	81.1122	88.0483	72.9273	15.121	1.09926e-05	0.00901759	C23H6orf132	110.356	-2.7912	8.92e-06	TRUE	FALSE	TRUE	FALSE	BosSINEL	+	7
ctg23-15849827-15850048	89.5475	96.1514	81.4084	14.743	0.00015926	0.0148443	C23H6orf132	110.356	-2.7912	8.92e-06	TRUE	FALSE	TRUE	FALSE	BosSINE2	-	8
ctg23-19642040-19642360	67.0031	71.7622	60.7418	11.0204	0.00252352	0.0430208	RCAN2	7.13692	-2.21142	0.0402416	TRUE	FALSE	TRUE	FALSE	BosSINE1	+	4
ctg23-20250598-20250764	83.6652	93.858	71.6979	22.1602	0.000291459	0.0180281	ADGRF1	145.408	-3.99275	0.000443321	TRUE	FALSE	TRUE	FALSE	BosSINE2	-	3
ctg23-20472618-20472886	90.6044	95.1272	85.0556	10.0716	0.00212864	0.0396247	TNFRSF21	1782.6	-1.41984	0.0014063	TRUE	FALSE	TRUE	FALSE	BosSINEL	+	9
ctg23-20472987-20473175	85.5103	92.9022	76.5415	16.3606	7.73607e-05	0.0124599	TNFRSF21	1782.6	-1.41984	0.0014063	TRUE	FALSE	TRUE	FALSE	BosSINE3	-	5
ctg23-20475185-20475458	87.2135	93.0227	80.0636	12.9591	0.000473624	0.0209513	TNFRSF21	1782.6	-1.41984	0.0014063	TRUE	FALSE	TRUE	FALSE	BosSINEL	-	11
ctg23-20479409-20479509	86.7149	94.3427	77.3269	17.0158	0.000250236	0.0167908	TNFRSF21	1782.6	-1.41984	0.0014063	TRUE	FALSE	TRUE	FALSE	BosSINE6	-	3
ctg23-25726237-25726460	13.8371	7.06282	22.113	-15.0502	3.52765e-05	0.0107934	BOLA-DRB3	6942.61	1.53117	0.000968448	TRUE	FALSE	TRUE	FALSE	BosSINE2	+	6
ctg23-27294000-27294210	81.1626	85.8196	75.1361	10.6835	0.00178879	0.0363949	TNXB	49.3672	-1.53243	0.0122871	TRUE	FALSE	TRUE	FALSE	BosSINE3	+	5
ctg23-28493871-28493964	8.6731	0.73372	18.3742	-17.6405	0.00169868	0.0363949	LOC512672	2408.02	1.31111	0.0010343	TRUE	FALSE	TRUE	FALSE	BosSINE2	+	7
ctg23-28935859-28936043	82.4266	88.3941	75.3317	13.0624	0.000858483	0.026256	ZFP57	54.3016	-2.18355	3.26e-05	TRUE	FALSE	FALSE	TRUE	BosSINE3	+	4
ctg23-32432439-32432592	90.2538	95.5618	83.9628	11.599	0.00015926	0.0148443	CARMIL1	562.035	-2.31716	3.1e-05	TRUE	FALSE	TRUE	FALSE	BosSINE3	+	3
ctg23-39675169-39675374	88.2909	93.2554	82.1808	11.0746	0.000707298	0.0243453	KIF13A	262.142	-1.08544	0.000168739	TRUE	FALSE	TRUE	FALSE	BosSINE3	+	7
ctg23-39696282-39696479	86.4946	96.5926	74.2167	22.3759	0.000192688	0.0158399	KIF13A	262.142	-1.08544	0.000168739	TRUE	FALSE	TRUE	FALSE	BosSINE3	+	4
ctg23-39697653-39697861	81.0138	94.868	63.9625	30.9055	0.000793191	0.026256	KIF13A	262.142	-1.08544	0.000168739	TRUE	FALSE	TRUE	FALSE	BosSINE3	+	4
ctg23-40422425-40422645	68.6914	75.5695	60.5269	15.0426	0.00149782	0.0334817	ATXN1	775.061	1.13731	0.00638073	TRUE	TRUE	FALSE	FALSE	BosSINE2	+	4
ctg23-40553756-40554024	59.652	52.6507	68.306	-15.6553	0.000858483	0.026256	ATXN1	775.061	1.13731	0.00638073	TRUE	FALSE	TRUE	FALSE	BosSINEL	+	7
ctg23-40721158-40721360	75.4197	85.3627	63.9995	21.3632	0.00015926	0.0148443	ATXN1	775.061	1.13731	0.00638073	TRUE	FALSE	TRUE	FALSE	BosSINE3	-	7
ctg23-43165890-43166099	86.3657	93.1937	78.8615	14.3322	0.00124915	0.0309714	GFOD1	467.093	-1.06343	0.0182606	TRUE	FALSE	TRUE	FALSE	BosSINE3	-	3
ctg23-43377233-43377434	84.0587	93.5646	72.6988	20.8658	0.00015926	0.0148443	PHACTR1	835.393	1.31189	0.000215899	TRUE	FALSE	TRUE	FALSE	BosSINE3	+	3
ctg23-43390792-43391005	74.7899	69.3617	81.3744	-12.0127	0.000473624	0.0209513	PHACTR1	835.393	1.31189	0.000215899	TRUE	FALSE	TRUE	FALSE	BosSINE2	+	7
ctg23-43459775-43459996	74.1742	80.1006	66.9597	13.1409	0.00149782	0.0334817	PHACTR1	835.393	1.31189	0.000215899	TRUE	FALSE	TRUE	FALSE	BosSINE2	+	4
ctg23-43535455-43535654	77.1345	89.8833	61.7744	28.109	7.73607e-05	0.0124599	PHACTR1	835.393	1.31189	0.000215899	TRUE	FALSE	TRUE	FALSE	BosSINE3	+	3
ctg23-45364617-45364810	31.2258	22.3127	42.0357	-19.723	7.73607e-05	0.0124599	MAK	17.0194	-3.0737	0.000166134	TRUE	FALSE	TRUE	FALSE	BosSINEL	-	7
ctg23-45381608-45381793	81.135	92.5897	67.6679	24.9218	0.000676282	0.0243453	MAK	17.0194	-3.0737	0.000166134	TRUE	FALSE	TRUE	FALSE	BosSINE4	-	3
ctg23-47856786-47856928	79.6331	91.1637	65.4415	25.7222	4.62101e-05	0.0113782	DSP	737.816	-3.23388	3.98e-05	TRUE	FALSE	TRUE	FALSE	BosSINE5	-	5
ctg23-50041843-50041938	88.4793	93.899	81.809	12.09	0.000676282	0.0243453	ECI2	51.0968	-1.39931	6.17e-05	TRUE	FALSE	TRUE	FALSE	BosSINE2	-	3
ctg23-51212162-51212416	86.9569	93.5299	78.9987	14.5312	0.000858483	0.026256	GMDS	174.331	-1.07053	0.0206582	TRUE	FALSE	TRUE	FALSE	BosSINEL	-	3
ctg23-51338894-51339104	86.4729	93.1878	78.75	14.4378	0.00198042	0.0394187	GMDS	174.331	-1.07053	0.0206582	TRUE	FALSE	TRUE	FALSE	BosSINE3	-	3
ctg23-51371224-51371493	16.0902	3.56615	31.5045	-27.9383	0.000123526	0.013894	GMDS	174.331	-1.07053	0.0206582	TRUE	FALSE	TRUE	FALSE	BosSINEL	-	6
ctg23-51724040-51724256	79.6656	87.5242	70.5168	17.0074	1.49417e-05	0.0093863	LOC101904396	1.75192	-4.44547	0.00819728	TRUE	FALSE	TRUE	FALSE	BosSINE2	+	7
ctg23-52203587-52203855	63.0013	58.0416	68.859	-10.8174	0.00212864	0.0396247	IRF4	587.182	1.12463	0.00158932	TRUE	TRUE	FALSE	FALSE	BosSINEL	-	6
ctg23-6644232-6644427	88.1213	95.9688	78.4628	17.5059	0.00170445	0.0363949	LRRC1	254.247	-2.75882	0.000303421	TRUE	FALSE	TRUE	FALSE	BosSINE2	+	3
ctg23-7251914-7252189	45.5542	37.5045	55.4919	-17.9874	0.00212864	0.0396247	BOLA-DMB	491.807	1.37631	0.00258965	TRUE	FALSE	TRUE	FALSE	BosSINEL	-	8
ctg23-7322866-7323054	21.7007	6.78464	39.4221	-32.6375	1.09926e-05	0.00901759	BOLA-DOA	251.071	1.60927	4.34e-05	TRUE	FALSE	TRUE	FALSE	BosSINE4	+	4
ctg23-9443182-9443323	87.156	92.4617	80.626	11.8358	0.000148393	0.0148443	TEAD3	38.9614	-1.81849	0.00135019	TRUE	FALSE	TRUE	FALSE	BosSINE5	+	4
ctg24-20472496-20472578	78.9137	86.4628	70.0526	16.4102	1.09926e-05	0.00901759	FHOD3	11.7833	-2.73976	0.0021001	TRUE	FALSE	TRUE	FALSE	BosSINE1	-	3
ctg24-24777711-24777902	61.7464	69.2565	52.8923	16.3642	0.00212864	0.0396247	GAREM1	156.934	-3.67918	1.82e-05	TRUE	FALSE	TRUE	FALSE	BosSINE2	-	3
ctg24-24792109-24792381	65.2722	57.9211	74.0022	-16.0811	0.000858483	0.026256	GAREM1	156.934	-3.67918	1.82e-05	TRUE	FALSE	TRUE	FALSE	BosSINEL	+	7
ctg24-24914054-24914262	82.9909	94.5859	68.7202	25.8657	7.73607e-05	0.0124599	GAREM1	156.934	-3.67918	1.82e-05	TRUE	FALSE	TRUE	FALSE	BosSINE3	-	4
ctg24-26034112-26034323	70.536	83.5197	54.0198	29.4999	0.00103778	0.0285926	DSC2	164.256	-2.74643	0.000238727	TRUE	FALSE	TRUE	FALSE	BosSINE3	-	4
ctg24-28734939-28735205	79.4589	74.4852	84.7587	-10.2735	0.000858483	0.026256	CDH2	7.10173	-2.60267	0.0105807	TRUE	FALSE	TRUE	FALSE	BosSINEL	-	4
ctg24-32848332-32848531	77.0672	92.5333	58.0321	34.5013	0.000250236	0.0167908	LAMA3	170.359	-1.27842	0.00514861	TRUE	FALSE	TRUE	FALSE	BosSINE3	+	3
ctg24-34869086-34869230	83.3141	90.3681	74.4329	15.9352	0.000311152	0.0180281	GREB1L	13.7906	-2.78406	0.000668894	TRUE	FALSE	TRUE	FALSE	BosSINE2	-	5
ctg24-35618264-35618515	79.3911	90.1069	65.9867	24.1202	0.00178879	0.0363949	YES1	124.082	-3.38009	3.67e-05	TRUE	FALSE	TRUE	FALSE	BosSINEL	+	6
ctg24-37147858-37148152	85.6317	94.8143	74.3097	20.5046	0.000200254	0.0158399	LPIN2	2599.12	1.22594	0.00302462	TRUE	FALSE	TRUE	FALSE	BosSINEL	-	11
ctg24-37212267-37212477	88.917	94.1417	82.4865	11.6551	0.000148393	0.0148443	LPIN2	2599.12	1.22594	0.00302462	TRUE	FALSE	TRUE	FALSE	BosSINE3	+	6
ctg24-37226990-37227202	90.6163	95.6218	84.4126	11.2092	0.00230253	0.0418835	LPIN2	2599.12	1.22594	0.00302462	TRUE	FALSE	TRUE	FALSE	BosSINE3	+	5
ctg24-40358589-40358718	73.168	85.3714	59.9177	25.4537	0.000413267	0.0205211	PTPRM	19.1082	-3.0689	0.00325948	TRUE	FALSE	TRUE	FALSE	BosSINE3	-	3
ctg24-40522834-40523045	73.4668	85.4718	59.3359	26.1359	0.000126017	0.013894	PTPRM	19.1082	-3.0689	0.00325948	TRUE	FALSE	TRUE	FALSE	BosSINE2	+	5
ctg24-40542531-40542745	77.1073	82.9703	69.8913	13.079	0.000200254	0.0158399	PTPRM	19.1082	-3.0689	0.00325948	TRUE	FALSE	TRUE	FALSE	BosSINE3	-	4
ctg24-40588329-40588541	83.4124	88.976	76.4078	12.5682	0.000580014	0.0224556	PTPRM	19.1082	-3.0689	0.00325948	TRUE	FALSE	TRUE	FALSE	BosSINE2	-	5
ctg24-40618223-40618367	85.5653	95.1841	74.1634	21.0207	0.000618051	0.0238258	PTPRM	19.1082	-3.0689	0.00325948	TRUE	FALSE	TRUE	FALSE	BosSINE2	-	3
ctg24-40642591-40642811	65.3332	60.6812	71.0587	-10.3774	0.00252352	0.0430208	PTPRM	19.1082	-3.0689	0.00325948	TRUE	FALSE	TRUE	FALSE	BosSINE2	-	4
ctg24-40771759-40772087	82.4489	89.742	72.7181	17.024	0.000131814	0.014474	PTPRM	19.1082	-3.0689	0.00325948	TRUE	FALSE	TRUE	FALSE	BosSINE1	-	3
ctg24-40795785-40795930	86.5116	91.0604	80.8073	10.2532	0.00298141	0.0468558	PTPRM	19.1082	-3.0689	0.00325948	TRUE	FALSE	TRUE	FALSE	BosSINE2	+	3
ctg24-40820656-40820851	57.1687	66.4832	45.4098	21.0734	0.000126017	0.013894	PTPRM	19.1082	-3.0689	0.00325948	TRUE	FALSE	TRUE	FALSE	BosSINE2	+	3
ctg24-40856917-40857050	44.1696	32.7308	57.4779	-24.7471	0.001255	0.0309714	PTPRM	19.1082	-3.0689	0.00325948	TRUE	FALSE	TRUE	FALSE	BosSINEL	-	4
ctg24-40894865-40895127	82.6597	91.2783	72.4904	18.788	3.52765e-05	0.0107934	PTPRM	19.1082	-3.0689	0.00325948	TRUE	FALSE	TRUE	FALSE	BosSINEL	+	6
ctg24-41788185-41788263	90.7667	96.5479	83.6513	12.8966	0.000210157	0.0163489	RAB31	3653.75	1.19509	0.0134307	TRUE	FALSE	TRUE	FALSE	BosSINE3	+	3
ctg24-41881155-41881349	82.0145	88.1613	74.6099	13.5513	3.52765e-05	0.0107934	TXNDC2	60.2251	2.52329	0.00468155	TRUE	TRUE	FALSE	FALSE	BosSINE3	-	4
ctg24-42169372-42169571	78.6023	90.949	63.1563	27.7927	5.9973e-05	0.011619	APCDD1	32.6363	-2.14254	0.00154576	TRUE	TRUE	FALSE	FALSE	BosSINE1	-	6
ctg24-42299563-42299683	64.9277	69.61	59.4496	10.1604	0.000843915	0.026256	PIEZO2	9.5255	-2.40344	0.00666525	TRUE	FALSE	TRUE	FALSE	BosSINE3	-	5
ctg24-42418451-42418673	71.9052	77.775	64.6276	13.1474	0.000858483	0.026256	PIEZO2	9.5255	-2.40344	0.00666525	TRUE	FALSE	TRUE	FALSE	BosSINE2	-	4
ctg24-4265139-4265358	31.7835	15.8802	51.795	-35.9148	0.00298141	0.0468558	FBXO15	7.89142	-1.30573	0.0214587	TRUE	FALSE	TRUE	FALSE	BosSINE2	+	3
ctg24-45687607-45687829	87.3759	92.252	81.2324	11.0197	0.000707298	0.0243453	EPG5	3241.23	1.62307	1.41e-05	TRUE	FALSE	TRUE	FALSE	BosSINE3	+	6
ctg24-47805424-47805625	62.1263	72.7719	49.024	23.7478	0.000250236	0.0167908	ZBTB7C	18.7748	-2.10161	0.00207984	TRUE	FALSE	TRUE	FALSE	BosSINE3	+	4
ctg24-47973253-47973471	82.4975	90.4713	72.7628	17.7085	0.00124915	0.0309714	ZBTB7C	18.7748	-2.10161	0.00207984	TRUE	FALSE	TRUE	FALSE	BosSINE2	-	6
ctg24-48010531-48010749	79.2269	85.2856	71.77	13.5156	0.000858483	0.026256	ZBTB7C	18.7748	-2.10161	0.00207984	TRUE	FALSE	TRUE	FALSE	BosSINE2	-	5
ctg24-49517677-49517950	87.2933	92.1317	81.0955	11.0362	0.000580014	0.0224556	MYO5B	256.256	-2.98252	0.000109366	TRUE	FALSE	TRUE	FALSE	BosSINEL	+	6
ctg24-5075656-5075871	73.2833	78.7844	66.5128	12.2716	0.000250236	0.0167908	LOC100848447	2.66919	-3.0541	0.0364073	TRUE	TRUE	FALSE	FALSE	BosSINE3	-	3
ctg24-51800355-51800558	85.2821	90.9042	78.3243	12.5799	0.00149782	0.0334817	DCC	2.03848	-3.30748	0.0360041	TRUE	FALSE	TRUE	FALSE	BosSINEL	+	6
ctg24-54768962-54769170	80.1357	92.8864	64.6599	28.2265	0.00124915	0.0309714	TCF4	649.705	1.45047	0.00137743	TRUE	FALSE	TRUE	FALSE	BosSINE3	+	7
ctg24-54923258-54923468	45.8509	37.525	56.0981	-18.5731	1.4121e-05	0.0093863	TCF4	649.705	1.45047	0.00137743	TRUE	FALSE	TRUE	FALSE	BosSINE2	-	4
ctg24-56712317-56712512	71.4766	78.0192	64.3397	13.6795	0.000473624	0.0209513	ONECUT2	24.1289	-1.25108	0.0399146	TRUE	FALSE	TRUE	FALSE	BosSINE3	-	3
ctg24-56950254-56950484	50.2643	40.8048	62.1679	-21.3631	0.000473624	0.0209513	ATP8B1	153.458	-1.67548	1.33e-05	TRUE	FALSE	TRUE	FALSE	BosSINE2	+	4
ctg24-60314255-60314379	81.1161	89.7656	70.4705	19.2951	0.000473624	0.0209513	RNF152	16.2576	-1.53934	0.0359256	TRUE	FALSE	TRUE	FALSE	BosSINE4	-	3
ctg24-61529117-61529325	79.7119	89.0583	68.5606	20.4977	0.00038477	0.0194558	BCL2	1016.5	1.17071	0.000253378	TRUE	FALSE	TRUE	FALSE	BosSINE3	+	4
ctg24-61530654-61530772	84.4452	94.7503	72.1242	22.6261	0.00214001	0.0396247	BCL2	1016.5	1.17071	0.000253378	TRUE	FALSE	TRUE	FALSE	BosSINE6	-	7
ctg24-61542065-61542247	81.1461	75.8092	86.9298	-11.1206	0.00038477	0.0194558	BCL2	1016.5	1.17071	0.000253378	TRUE	FALSE	TRUE	FALSE	BosSINE3	+	7
ctg24-61731249-61731375	71.8518	88.8211	52.2718	36.5493	7.42479e-06	0.00881238	SERPINB5	118.252	-3.50094	6.42e-05	TRUE	FALSE	TRUE	FALSE	BosSINE6	-	3
ctg24-7520443-7520633	51.8349	56.9487	45.1767	11.772	3.53649e-07	0.00754262	DOK6	5.45547	-2.95453	0.00608786	TRUE	FALSE	TRUE	FALSE	BosSINE3	+	3
ctg24-7527438-7527661	81.1529	90.3075	69.4812	20.8263	0.00298141	0.0468558	DOK6	5.45547	-2.95453	0.00608786	TRUE	FALSE	TRUE	FALSE	BosSINE2	-	5
ctg24-9459679-9459891	86.3345	81.3333	92.4897	-11.1564	0.00286031	0.0468558	DSEL	10.6131	-2.53222	0.000827426	TRUE	FALSE	TRUE	FALSE	BosSINE2	-	3
ctg25-10256910-10257130	61.4568	52.5008	73.5749	-21.0741	0.000248332	0.0167908	LITAF	6254	1.49493	0.00129476	TRUE	FALSE	TRUE	FALSE	BosSINE1	+	4
ctg25-12000293-12000450	78.7545	83.4302	73.4051	10.0251	0.00252352	0.0430208	SHISA9	2.36316	-2.91227	0.0200563	TRUE	FALSE	TRUE	FALSE	BosSINE3	-	3
ctg25-12036150-12036275	64.7921	69.4385	58.7721	10.6664	0.000858483	0.026256	SHISA9	2.36316	-2.91227	0.0200563	TRUE	FALSE	TRUE	FALSE	BosSINEL	+	3
ctg25-12040916-12041126	76.4137	81.2273	70.314	10.9133	0.00103778	0.0285926	SHISA9	2.36316	-2.91227	0.0200563	TRUE	FALSE	TRUE	FALSE	BosSINE2	-	4
ctg25-12095935-12096159	64.4695	70.8267	56.742	14.0846	0.00124915	0.0309714	SHISA9	2.36316	-2.91227	0.0200563	TRUE	FALSE	TRUE	FALSE	BosSINE2	+	4
ctg25-16747500-16747695	59.3438	70.0363	46.0878	23.9485	0.000707298	0.0243453	SYT17	115.952	-5.58345	1.99e-06	TRUE	FALSE	TRUE	FALSE	BosSINE1	-	4
ctg25-1691188-1691455	52.309	62.095	40.2646	21.8304	0.00015926	0.0148443	LOC100847802	401.274	-2.15864	0.00159901	TRUE	TRUE	FALSE	FALSE	BosSINEL	+	10
ctg25-17084111-17084325	78.4936	83.0885	72.7641	10.3244	0.00252352	0.0430208	TMC5	71.2338	-5.83919	2.23e-05	TRUE	FALSE	TRUE	FALSE	BosSINE3	-	3
ctg25-17451442-17451688	86.4617	92.8297	78.8026	14.0271	0.000250236	0.0167908	IQCK	5.33805	-2.05684	0.0177964	TRUE	FALSE	TRUE	FALSE	BosSINEL	+	8
ctg25-18505991-18506195	80.2635	85.4583	72.9854	12.473	0.00235655	0.0428105	ACSM3	4.90529	-2.76697	0.00463211	TRUE	FALSE	TRUE	FALSE	BosSINE1	-	3
ctg25-20142875-20143093	64.7231	57.2587	73.91	-16.6513	0.000580014	0.0224556	IGSF6	2968.87	2.56617	0.000324801	TRUE	TRUE	FALSE	FALSE	BosSINE2	-	5
ctg25-2448691-2448858	74.5155	83.1542	63.8833	19.2708	0.000148393	0.0148443	BICDL2	15.6494	-3.46457	0.00016458	TRUE	FALSE	TRUE	FALSE	BosSINE3	-	3
ctg25-25697810-25698025	85.6128	95.3863	73.5838	21.8024	0.00092863	0.0278673	XPO6	8813.1	1.67151	0.000996087	TRUE	FALSE	TRUE	FALSE	BosSINE2	+	5
ctg25-26507438-26507657	23.0815	10.8438	38.2723	-27.4285	0.000858483	0.026256	QPRT	16.9509	-4.12396	1.51e-05	TRUE	FALSE	FALSE	TRUE	BosSINE2	-	7
ctg25-28086821-28087031	76.4101	90.1318	59.7774	30.3545	0.000200254	0.0158399	TPST1	36.7162	-1.26961	0.00463343	TRUE	FALSE	TRUE	FALSE	BosSINE3	-	3
ctg25-29837201-29837423	76.4444	87.8397	62.675	25.1647	5.59944e-07	0.00754262	AUTS2	1136.48	1.24344	0.0249031	TRUE	FALSE	TRUE	FALSE	BosSINE2	-	6
ctg25-29919733-29919940	80.2759	88.6439	69.9002	18.7437	0.00212864	0.0396247	AUTS2	1136.48	1.24344	0.0249031	TRUE	FALSE	TRUE	FALSE	BosSINE2	-	3
ctg25-30023274-30023417	78.8924	88.0068	68.0745	19.9323	0.000414629	0.0205211	AUTS2	1136.48	1.24344	0.0249031	TRUE	FALSE	TRUE	FALSE	BosSINE3	-	4
ctg25-30088696-30088897	73.5608	85.6454	58.9923	26.6531	0.00149782	0.0334817	AUTS2	1136.48	1.24344	0.0249031	TRUE	FALSE	TRUE	FALSE	BosSINE3	+	3
ctg25-30089281-30089497	74.7218	88.3651	59.3687	28.9964	0.00220693	0.0407202	AUTS2	1136.48	1.24344	0.0249031	TRUE	FALSE	TRUE	FALSE	BosSINE2	+	4
ctg25-30159013-30159217	87.0492	93.7985	78.1355	15.663	0.000473624	0.0209513	AUTS2	1136.48	1.24344	0.0249031	TRUE	FALSE	TRUE	FALSE	BosSINE3	-	7
ctg25-30682936-30683150	77.563	90.1538	62.2385	27.9153	0.0013664	0.0331412	AUTS2	1136.48	1.24344	0.0249031	TRUE	FALSE	TRUE	FALSE	BosSINE2	+	3
ctg25-32768850-32768975	11.0761	1.60833	23.0673	-21.459	0.000151363	0.0148443	NCF1	4969.37	3.14179	2.15e-05	TRUE	FALSE	TRUE	FALSE	BosSINE6	+	3
ctg25-32769205-32769330	17.9283	4.08166	35.0394	-30.9578	0.00252352	0.0430208	NCF1	4969.37	3.14179	2.15e-05	TRUE	FALSE	TRUE	FALSE	BosSINE3	-	7
ctg25-33287349-33287557	32.7665	23.1081	44.5147	-21.4066	0.000580014	0.0224556	ELN	33.3958	1.32513	0.0407558	TRUE	FALSE	TRUE	FALSE	BosSINE3	+	6
ctg25-33480810-33480994	52.4321	64.3145	37.7924	26.5221	0.00015926	0.0148443	CLDN4	864.04	-3.4051	8.19e-06	TRUE	FALSE	FALSE	TRUE	BosSINE4	+	6
ctg25-34615179-34615412	18.8879	7.35875	33.1781	-25.8193	0.000858483	0.026256	LOC104970450	15.3913	2.21436	0.00610258	TRUE	FALSE	TRUE	FALSE	BosSINEL	-	6
ctg25-35580829-35581028	88.7495	94.347	81.9688	12.3782	0.000580014	0.0224556	AP1S1	325.787	-1.08966	0.00240653	TRUE	FALSE	TRUE	FALSE	BosSINE3	-	6
ctg25-35582872-35583136	78.4672	89.1906	65.2692	23.9214	0.000311152	0.0180281	AP1S1	325.787	-1.08966	0.00240653	TRUE	TRUE	FALSE	FALSE	BosSINEL	-	8
ctg25-36447356-36447567	88.1811	93.6043	81.483	12.1213	0.00307205	0.0476466	LOC112444279	14.8093	-1.90555	0.00865142	TRUE	TRUE	FALSE	FALSE	BosSINE3	+	5
ctg25-39131661-39131779	75.5613	83.9128	65.5679	18.3448	0.0021373	0.0396247	RADIL	10.1629	-4.05232	0.000133306	TRUE	FALSE	TRUE	FALSE	BosSINE6	+	4
ctg25-39153286-39153398	75.8136	91.7746	56.164	35.6106	9.90217e-05	0.0132745	RADIL	10.1629	-4.05232	0.000133306	TRUE	FALSE	TRUE	FALSE	BosSINE5	+	9
ctg25-39716539-39716754	81.3372	90.0633	70.7279	19.3353	0.00038477	0.0194558	SDK1	72.7772	-2.20662	0.000133804	TRUE	FALSE	TRUE	FALSE	BosSINE2	-	5
ctg25-39939482-39939757	79.0203	83.6121	73.5152	10.0968	0.00103778	0.0285926	SDK1	72.7772	-2.20662	0.000133804	TRUE	FALSE	TRUE	FALSE	BosSINEL	+	5
ctg25-41792888-41792975	92.8805	97.7562	86.8795	10.8768	0.000776789	0.026256	ADAP1	871.696	1.1188	0.00891759	TRUE	FALSE	TRUE	FALSE	BosSINE6	-	3
ctg25-41792902-41792995	92.8805	97.7562	86.8795	10.8768	0.000776789	0.026256	ADAP1	871.696	1.1188	0.00891759	TRUE	FALSE	TRUE	FALSE	BosSINE4	-	3
ctg25-8675153-8675377	73.7268	78.5011	67.5509	10.9503	0.00103778	0.0285926	GRIN2A	3.40696	-3.1329	0.0113654	TRUE	FALSE	TRUE	FALSE	BosSINE2	-	4
ctg25-8783652-8783814	80.2427	87.8981	70.5448	17.3533	0.00124915	0.0309714	GRIN2A	3.40696	-3.1329	0.0113654	TRUE	FALSE	TRUE	FALSE	BosSINE5	-	5
ctg25-8819996-8820205	74.769	79.301	69.191	10.11	0.000250236	0.0167908	GRIN2A	3.40696	-3.1329	0.0113654	TRUE	FALSE	TRUE	FALSE	BosSINE2	+	3
ctg25-9308412-9308630	63.2494	76.305	47.4321	28.8728	0.00015926	0.0148443	EMP2	41.0553	-3.51461	6.54e-05	TRUE	FALSE	TRUE	FALSE	BosSINE2	-	5
ctg25-9559876-9560006	70.6016	64.6717	77.8582	-13.1865	0.00124915	0.0309714	CIITA	353.229	1.45269	0.000129901	TRUE	FALSE	TRUE	FALSE	BosSINEL	-	5
ctg25-9562061-9562278	86.7082	92.5693	79.7974	12.7719	0.00103778	0.0285926	CIITA	353.229	1.45269	0.000129901	TRUE	FALSE	TRUE	FALSE	BosSINE2	+	4
ctg26-10532593-10532695	82.8351	95.4	67.3705	28.0295	0.000858483	0.026256	ANKRD22	1568.07	1.61089	0.00530432	TRUE	FALSE	TRUE	FALSE	BosSINE1	+	3
ctg26-12539326-12539519	88.7374	93.9552	82.3154	11.6398	0.00108524	0.0293547	ANKRD1	28.1198	-2.9813	4.74e-05	TRUE	FALSE	TRUE	FALSE	BosSINE3	+	3
ctg26-15790529-15790751	75.8634	90.2279	58.6008	31.6271	1.09926e-05	0.00901759	PLCE1	64.6666	-4.62046	6.22e-07	TRUE	FALSE	TRUE	FALSE	BosSINE2	+	5
ctg26-15798631-15798905	79.8511	86.2645	71.795	14.4694	3.52765e-05	0.0107934	PLCE1	64.6666	-4.62046	6.22e-07	TRUE	FALSE	TRUE	FALSE	BosSINEL	-	8
ctg26-16774309-16774582	83.9034	90.3819	75.93	14.4519	4.62101e-05	0.0113782	PDLIM1	33.6872	-3.18635	3.67e-05	TRUE	FALSE	TRUE	FALSE	BosSINEL	-	5
ctg26-16885588-16885781	80.0961	86.4567	72.3182	14.1385	0.000126017	0.013894	SORBS1	77.1837	-2.02476	0.0021001	TRUE	FALSE	TRUE	FALSE	BosSINEL	+	8
ctg26-18038389-18038662	90.4363	95.8102	84.3622	11.448	0.000200254	0.0158399	PIK3AP1	4634.7	1.48049	0.000852562	TRUE	FALSE	TRUE	FALSE	BosSINEL	+	11
ctg26-19146099-19146328	56.4431	47.8073	67.0718	-19.2645	0.00038477	0.0194558	CRTAC1	18.0495	-2.82449	0.0105469	TRUE	FALSE	TRUE	FALSE	BosSINE2	-	3
ctg26-19338548-19338764	74.5874	87.8921	58.1592	29.733	0.000858483	0.026256	LOXL4	37.1547	-1.55014	0.0396058	TRUE	FALSE	TRUE	FALSE	BosSINE2	+	5
ctg26-20076368-20076501	51.6663	43.1135	61.78	-18.6665	0.00103778	0.0285926	HPSE2	13.5628	-7.38639	3.64e-06	TRUE	FALSE	TRUE	FALSE	BosSINEL	-	5
ctg26-24286343-24286546	85.7434	93.9003	75.5292	18.3712	0.00312165	0.0483505	SH3PXD2A	118.421	-1.89158	2.19e-05	TRUE	FALSE	TRUE	FALSE	BosSINE3	-	3
ctg26-24336672-24336870	88.421	95.9297	79.0918	16.8379	2.54922e-05	0.0103792	SH3PXD2A	118.421	-1.89158	2.19e-05	TRUE	FALSE	TRUE	FALSE	BosSINE1	-	4
ctg26-24362986-24363245	82.4094	87.088	76.9431	10.1449	0.000858483	0.026256	SH3PXD2A	118.421	-1.89158	2.19e-05	TRUE	FALSE	TRUE	FALSE	BosSINEL	+	8
ctg26-32721765-32721992	85.975	96.6169	73.238	23.3789	0.000304386	0.0180281	GPAM	2295.61	-4.47195	5.7e-06	TRUE	FALSE	TRUE	FALSE	BosSINE2	+	3
ctg26-32735923-32736075	89.9531	95.7659	82.5787	13.1872	0.00260089	0.0442301	GPAM	2295.61	-4.47195	5.7e-06	TRUE	FALSE	TRUE	FALSE	BosSINE1	+	4
ctg26-32832417-32832608	57.3449	49.0623	67.3644	-18.3021	0.000580014	0.0224556	TECTB	43.5434	-3.37514	0.00320011	TRUE	FALSE	TRUE	FALSE	BosSINE2	+	4
ctg26-34792147-34792357	77.6965	89.0208	63.3206	25.7002	0.000575562	0.0224556	AFAP1L2	79.6489	-3.33212	2.32e-05	TRUE	FALSE	TRUE	FALSE	BosSINE2	+	3
ctg26-37133027-37133212	82.506	91.8738	71.9269	19.9469	0.000126017	0.013894	HSPA12A	15.6721	-5.25113	7.01e-05	TRUE	FALSE	TRUE	FALSE	BosSINE3	-	3
ctg26-37158856-37159064	81.5829	90.9147	69.8005	21.1142	0.000200254	0.0158399	HSPA12A	15.6721	-5.25113	7.01e-05	TRUE	FALSE	TRUE	FALSE	BosSINE2	-	7
ctg26-37159927-37160150	83.6912	89.3838	76.7471	12.6367	0.000707298	0.0243453	HSPA12A	15.6721	-5.25113	7.01e-05	TRUE	FALSE	TRUE	FALSE	BosSINE2	+	4
ctg26-41483194-41483361	76.1879	86.9146	62.9859	23.9287	0.00126597	0.0309714	FGFR2	14.3407	-2.96399	0.00196313	TRUE	FALSE	TRUE	FALSE	BosSINE3	-	3
ctg26-42032424-42032500	82.1086	89.5531	72.9462	16.607	0.000580014	0.0224556	TACC2	96.4835	-2.53623	1.78e-07	TRUE	FALSE	TRUE	FALSE	BosSINE3	-	4
ctg26-42503662-42503850	82.4996	92.5055	70.2656	22.2399	0.00229966	0.0418835	LOC100295703	1.49082	-6.08296	0.00762987	TRUE	FALSE	TRUE	FALSE	BosSINE1	+	3
ctg26-43624128-43624332	82.3066	91.0367	71.4405	19.5963	0.000200254	0.0158399	CPXM2	4.95853	-3.49031	0.0109819	TRUE	FALSE	TRUE	FALSE	BosSINE3	+	4
ctg26-43787563-43787768	72.3664	67.8158	77.8971	-10.0813	0.00038477	0.0194558	CHST15	4045.47	1.42411	0.00982101	TRUE	FALSE	TRUE	FALSE	BosSINE2	+	5
ctg26-48919341-48919447	76.0437	84.0146	66.2333	17.7812	0.000580014	0.0224556	MGMT	49.8835	-1.04843	0.0376915	TRUE	FALSE	TRUE	FALSE	BosSINE6	+	3
ctg26-50662045-50662174	85.4716	92.3065	76.6835	15.623	0.000200254	0.0158399	KNDC1	3.44309	-2.21505	0.0398847	TRUE	FALSE	TRUE	FALSE	BosSINEL	-	5
ctg26-7678961-7679187	83.208	92.3633	71.6588	20.7045	0.00124915	0.0309714	PRKG1	49.5835	-5.48073	4.64e-06	TRUE	FALSE	TRUE	FALSE	BosSINE2	+	4
ctg26-7955858-7956040	82.62	93.5492	69.3788	24.1703	0.00126597	0.0309714	PRKG1	49.5835	-5.48073	4.64e-06	TRUE	FALSE	TRUE	FALSE	BosSINE3	+	4
ctg26-8202555-8202829	84.4194	93.5839	73.3128	20.271	1.49417e-05	0.0093863	PRKG1	49.5835	-5.48073	4.64e-06	TRUE	FALSE	TRUE	FALSE	BosSINEL	-	6
ctg26-9429732-9429942	72.0436	80.304	61.2551	19.0489	5.9973e-05	0.011619	LOC101902784	13.3145	1.59194	0.0132823	TRUE	TRUE	FALSE	FALSE	BosSINE2	-	3
ctg27-13031430-13031650	74.8185	80.2156	68.176	12.0397	0.00178879	0.0363949	TENM3	4.27354	-2.1195	0.0215334	TRUE	FALSE	TRUE	FALSE	BosSINE3	-	4
ctg27-13508155-13508370	70.8445	76.72	63.8303	12.8897	0.000580014	0.0224556	TENM3	4.27354	-2.1195	0.0215334	TRUE	FALSE	TRUE	FALSE	BosSINE2	+	3
ctg27-13539744-13539828	81.0931	87.8448	72.7833	15.0615	0.00124915	0.0309714	TENM3	4.27354	-2.1195	0.0215334	TRUE	FALSE	TRUE	FALSE	BosSINEL	+	3
ctg27-1432348-1432542	76.2115	83.975	66.6564	17.3186	0.000707298	0.0243453	KBTBD11	74.0436	-1.27234	0.000585696	TRUE	TRUE	FALSE	FALSE	BosSINE3	+	3
ctg27-14471830-14472040	73.9891	82.9432	63.1951	19.7481	0.000311152	0.0180281	STOX2	41.3035	-2.9106	0.00023286	TRUE	FALSE	TRUE	FALSE	BosSINE3	+	6
ctg27-15894778-15894984	56.3083	65.5146	44.6879	20.8267	5.74679e-06	0.00881238	SORBS2	19.4812	-2.97601	0.000279306	TRUE	FALSE	TRUE	FALSE	BosSINE3	+	3
ctg27-15964126-15964249	82.9067	90.0167	73.9786	16.0382	0.00124915	0.0309714	SORBS2	19.4812	-2.97601	0.000279306	TRUE	FALSE	TRUE	FALSE	BosSINEL	-	3
ctg27-15979286-15979487	76.0039	83.6292	66.043	17.5862	0.000350963	0.0194558	SORBS2	19.4812	-2.97601	0.000279306	TRUE	FALSE	TRUE	FALSE	BosSINE3	+	3
ctg27-16260508-16260718	77.5957	67.1172	90.4923	-23.3751	0.000676282	0.0243453	CYP4V2	707.587	1.15075	0.0218752	TRUE	FALSE	TRUE	FALSE	BosSINE3	+	4
ctg27-19443920-19444178	80.9242	90.9706	69.2187	21.7519	1.09926e-05	0.00901759	MTUS1	224.702	-3.07335	9.15e-08	TRUE	FALSE	FALSE	TRUE	BosSINEL	-	7
ctg27-19772675-19772878	77.0111	88.1302	63.1396	24.9906	5.74679e-06	0.00881238	SLC7A2	5.23501	-2.69475	0.0181372	TRUE	FALSE	TRUE	FALSE	BosSINE3	+	4
ctg27-25902313-25902473	59.0539	49.0528	71.1154	-22.0626	0.000126017	0.013894	LOC101904305	9.46355	2.47798	0.0117385	TRUE	TRUE	FALSE	FALSE	BosSINEL	-	8
ctg27-35231109-35231326	85.9294	90.633	80.3327	10.3003	0.000473624	0.0209513	TCIM	78.9162	-3.64474	1.23e-05	TRUE	FALSE	FALSE	TRUE	BosSINE2	-	6
ctg27-37156037-37156156	22.3272	11.375	35.8069	-24.4319	0.00212864	0.0396247	IKBKB	1144.83	1.32589	0.000143635	TRUE	FALSE	TRUE	FALSE	BosSINE6	-	5
ctg27-38259551-38259753	73.9544	69.5422	79.9726	-10.4304	0.00252352	0.0430208	SH2D4A	43.0501	-3.12033	9.63e-05	TRUE	FALSE	TRUE	FALSE	BosSINE2	+	4
ctg27-41458850-41458969	74.5914	88.599	57.3513	31.2477	7.73607e-05	0.0124599	THRB	401.041	-2.16533	0.00187141	TRUE	FALSE	FALSE	TRUE	BosSINE6	+	3
ctg27-41536519-41536827	62.1436	55.8989	69.9611	-14.0622	0.000200254	0.0158399	THRB	401.041	-2.16533	0.00187141	TRUE	FALSE	TRUE	FALSE	BosSINE1	+	4
ctg27-41592088-41592300	73.3967	82.1069	62.4395	19.6674	0.000580014	0.0224556	THRB	401.041	-2.16533	0.00187141	TRUE	FALSE	TRUE	FALSE	BosSINE3	+	5
ctg27-41636768-41636985	87.004	93.1948	79.3846	13.8102	0.000486604	0.0212516	THRB	401.041	-2.16533	0.00187141	TRUE	FALSE	TRUE	FALSE	BosSINE2	+	3
ctg27-41642009-41642230	87.8163	94.3404	80.2516	14.0888	0.000858483	0.026256	THRB	401.041	-2.16533	0.00187141	TRUE	FALSE	TRUE	FALSE	BosSINE2	-	10
ctg27-41698730-41698955	71.7467	79.92	61.5331	18.3869	0.000488955	0.0212516	THRB	401.041	-2.16533	0.00187141	TRUE	FALSE	TRUE	FALSE	BosSINE2	+	5
ctg27-675576-675862	63.015	72.8818	53.4258	19.4561	0.00149782	0.0334817	DLGAP2	3.49671	-3.88851	0.00266726	TRUE	FALSE	TRUE	FALSE	BosSINE1	-	4
ctg28-10185945-10186146	76.2055	83.8667	66.8711	16.9956	0.000126017	0.013894	RYR2	5.10164	-3.10524	0.0142716	TRUE	FALSE	TRUE	FALSE	BosSINE1	-	5
ctg28-15895658-15895892	82.2844	86.9007	76.2949	10.6057	0.00252352	0.0430208	ANK3	249.64	-3.05297	2.33e-05	TRUE	FALSE	TRUE	FALSE	BosSINEL	+	5
ctg28-16363728-16364003	73.5589	85.8925	58.9091	26.9834	3.52765e-05	0.0107934	ANK3	249.64	-3.05297	2.33e-05	TRUE	FALSE	TRUE	FALSE	BosSINEL	-	8
ctg28-16379356-16379581	75.5862	82.6677	66.7537	15.914	0.00103778	0.0285926	ANK3	249.64	-3.05297	2.33e-05	TRUE	FALSE	TRUE	FALSE	BosSINE2	+	3
ctg28-16447640-16447909	67.7054	78.4308	54.5049	23.9259	0.000580014	0.0224556	ANK3	249.64	-3.05297	2.33e-05	TRUE	FALSE	FALSE	TRUE	BosSINEL	+	7
ctg28-16712507-16712727	73.6819	81.807	63.6817	18.1253	0.00038477	0.0194558	RHOBTB1	43.3818	-1.55817	0.000159917	TRUE	FALSE	TRUE	FALSE	BosSINE2	-	4
ctg28-18055143-18055244	86.3883	98.0388	72.3679	25.6709	0.000284957	0.0180281	ARID5B	3651.84	1.04129	0.0124774	TRUE	FALSE	TRUE	FALSE	BosSINE6	-	3
ctg28-18055279-18055499	90.6517	97.9148	81.7125	16.2023	3.8127e-05	0.0113782	ARID5B	3651.84	1.04129	0.0124774	TRUE	FALSE	TRUE	FALSE	BosSINE2	+	4
ctg28-19493719-19493900	89.2534	97.4794	79.2071	18.2723	0.0020099	0.0396247	JMJD1C	6460.32	1.35802	0.000824157	TRUE	FALSE	TRUE	FALSE	BosSINE4	-	3
ctg28-19592311-19592527	87.7752	96.8898	76.4888	20.401	0.00108524	0.0293547	JMJD1C	6460.32	1.35802	0.000824157	TRUE	TRUE	FALSE	FALSE	BosSINE2	-	5
ctg28-22769581-22769855	85.4135	91.5477	77.9951	13.5526	9.90217e-05	0.0132745	CTNNA3	24.5664	-2.84137	0.00983934	TRUE	FALSE	TRUE	FALSE	BosSINEL	+	3
ctg28-22867517-22867685	90.2398	94.6375	84.6191	10.0184	0.00198806	0.0394187	CTNNA3	24.5664	-2.84137	0.00983934	TRUE	FALSE	TRUE	FALSE	BosSINEL	-	4
ctg28-23027402-23027598	40.3105	32.7765	49.5011	-16.7246	2.00696e-05	0.0097305	CTNNA3	24.5664	-2.84137	0.00983934	TRUE	FALSE	TRUE	FALSE	BosSINEL	+	7
ctg28-23115339-23115509	84.7676	89.8047	78.7487	11.0559	0.000488955	0.0212516	CTNNA3	24.5664	-2.84137	0.00983934	TRUE	FALSE	TRUE	FALSE	BosSINE3	-	3
ctg28-24032127-24032331	76.1997	84.4517	66.4192	18.0324	0.000311152	0.0180281	CTNNA3	24.5664	-2.84137	0.00983934	TRUE	FALSE	TRUE	FALSE	BosSINE3	+	3
ctg28-24249694-24249968	84.8867	91.4418	76.6295	14.8123	0.00298141	0.0468558	DNAJC12	1432.87	-6.11643	1.74e-06	TRUE	FALSE	TRUE	FALSE	BosSINEL	+	8
ctg28-24250539-24250797	76.9631	92.4273	61.317	31.1103	0.00198296	0.0394187	DNAJC12	1432.87	-6.11643	1.74e-06	TRUE	FALSE	TRUE	FALSE	BosSINEL	-	4
ctg28-24281352-24281613	77.6351	83.943	69.8887	14.0543	0.00103778	0.0285926	DNAJC12	1432.87	-6.11643	1.74e-06	TRUE	FALSE	TRUE	FALSE	BosSINEL	-	11
ctg28-25852204-25852424	87.3718	94.9133	77.941	16.9723	0.000250236	0.0167908	TSPAN15	18.4773	-1.50204	0.0127891	TRUE	FALSE	TRUE	FALSE	BosSINE2	+	4
ctg28-28371085-28371310	74.927	87.7083	59.1962	28.5122	5.9973e-05	0.011619	LOC107131941	1315.2	3.47194	2.19e-05	TRUE	TRUE	FALSE	FALSE	BosSINE2	+	3
ctg28-29792649-29792848	71.2963	80.7981	59.3995	21.3986	0.00178879	0.0363949	PLAU	6519.21	1.68992	0.0121236	TRUE	FALSE	FALSE	TRUE	BosSINE2	-	5
ctg28-31889864-31890058	90.1594	95.763	83.374	12.389	0.00198806	0.0394187	LRMDA	155.022	1.07301	0.00410661	TRUE	FALSE	TRUE	FALSE	BosSINE3	+	4
ctg28-32884197-32884437	89.0875	94.6652	82.1149	12.5503	0.0013664	0.0331412	KCNMA1	29.2883	-5.42253	5.17e-05	TRUE	FALSE	TRUE	FALSE	BosSINE2	+	5
ctg28-33279136-33279410	14.4172	3.76198	27.5314	-23.7694	0.000412587	0.0205211	KCNMA1	29.2883	-5.42253	5.17e-05	TRUE	FALSE	TRUE	FALSE	BosSINEL	+	6
ctg28-37231150-37231362	69.3733	76.7476	60.4058	16.3418	0.000707298	0.0243453	NRG3	3.00914	-3.73334	0.01338	TRUE	FALSE	TRUE	FALSE	BosSINE2	-	4
ctg28-41375492-41375621	84.4167	89.6771	77.9423	11.7348	0.00198806	0.0394187	LDB3	2.23773	-2.81037	0.0340603	TRUE	FALSE	TRUE	FALSE	BosSINEL	-	3
ctg28-41501720-41501827	87.5757	95.254	78.551	16.703	0.00279216	0.0467015	BMPR1A	121.983	-1.56297	0.0118828	TRUE	FALSE	TRUE	FALSE	BosSINE6	+	4
ctg28-44660692-44660903	89.6972	94.3308	83.9094	10.4214	7.73607e-05	0.0124599	TMEM72	4.25832	-3.45618	0.00413021	TRUE	FALSE	TRUE	FALSE	BosSINE2	-	7
ctg28-4750814-4751021	66.1103	57.2978	77.1869	-19.8891	0.000250236	0.0167908	DISC1	107.734	1.15349	0.0153259	TRUE	FALSE	TRUE	FALSE	BosSINE2	+	3
ctg28-699980-700193	87.2078	94.4437	78.3019	16.1418	0.00307205	0.0476466	RHOU	385.557	-2.57538	0.00023246	TRUE	FALSE	TRUE	FALSE	BosSINE3	-	4
ctg28-8055259-8055522	92.9504	97.6067	87.271	10.3357	0.000294496	0.0180281	ARID4B	1357.26	1.15698	0.00267028	TRUE	FALSE	TRUE	FALSE	BosSINEL	-	7
ctg28-8306198-8306466	84.6597	90.102	78.0981	12.004	0.000858483	0.026256	GNG4	45.4303	1.78182	5e-05	TRUE	FALSE	TRUE	FALSE	BosSINEL	+	4
ctg28-9787996-9788178	75.7912	80.6952	70.1365	10.5588	1.09926e-05	0.00901759	RYR2	5.10164	-3.10524	0.0142716	TRUE	FALSE	TRUE	FALSE	BosSINE3	-	5
ctg29-10716078-10716307	80.8983	88.9144	71.1585	17.7559	0.00171346	0.0363949	DLG2	21.2322	-1.68922	0.0311416	TRUE	FALSE	TRUE	FALSE	BosSINE3	+	4
ctg29-10716156-10716308	80.8983	88.9144	71.1585	17.7559	0.00171346	0.0363949	DLG2	21.2322	-1.68922	0.0311416	TRUE	FALSE	TRUE	FALSE	BosSINEL	+	4
ctg29-10932697-10932920	78.4784	86.1385	69.1346	17.0039	0.00178879	0.0363949	DLG2	21.2322	-1.68922	0.0311416	TRUE	FALSE	TRUE	FALSE	BosSINE2	+	6
ctg29-11116115-11116327	71.3187	76.5781	64.4878	12.0903	0.00178879	0.0363949	DLG2	21.2322	-1.68922	0.0311416	TRUE	FALSE	TRUE	FALSE	BosSINE3	+	3
ctg29-11193804-11194019	77.0614	89.0323	61.9354	27.0969	0.000473624	0.0209513	DLG2	21.2322	-1.68922	0.0311416	TRUE	FALSE	TRUE	FALSE	BosSINE2	+	3
ctg29-11457346-11457548	81.6772	86.7368	75.3995	11.3373	0.000126017	0.013894	DLG2	21.2322	-1.68922	0.0311416	TRUE	FALSE	TRUE	FALSE	BosSINE3	-	4
ctg29-12235969-12236097	87.6832	92.5134	81.6615	10.8519	0.00252352	0.0430208	DLG2	21.2322	-1.68922	0.0311416	TRUE	FALSE	TRUE	FALSE	BosSINEL	+	7
ctg29-1550330-1550509	59.6641	74.7214	41.1283	33.5931	0.000185966	0.0158399	DEUP1	24.0025	-3.52972	0.0017734	TRUE	FALSE	TRUE	FALSE	BosSINE1	+	3
ctg29-17182861-17183084	80.2438	85.3121	73.6093	11.7029	0.00298141	0.0468558	TENM4	11.75	-2.58914	0.00372551	TRUE	FALSE	TRUE	FALSE	BosSINE3	+	4
ctg29-17257239-17257425	51.4994	43.8195	61.1848	-17.3654	0.000580014	0.0224556	TENM4	11.75	-2.58914	0.00372551	TRUE	FALSE	TRUE	FALSE	BosSINE3	-	5
ctg29-17353902-17353953	84.5299	92.2115	75.0756	17.1358	0.00108369	0.0293547	TENM4	11.75	-2.58914	0.00372551	TRUE	FALSE	TRUE	FALSE	BosSINE3	+	3
ctg29-17616101-17616336	29.4808	17.3566	44.2542	-26.8976	0.000858483	0.026256	GAB2	4414.3	1.80806	0.00018707	TRUE	FALSE	TRUE	FALSE	BosSINE3	+	10
ctg29-17764504-17764710	46.2797	34.6945	60.5385	-25.8439	0.000473624	0.0209513	GAB2	4414.3	1.80806	0.00018707	TRUE	FALSE	TRUE	FALSE	BosSINE3	+	4
ctg29-18018497-18018771	80.2462	91.3595	67.2806	24.079	0.000519923	0.0224556	KCTD14	21.58	-1.61474	0.034133	TRUE	FALSE	FALSE	TRUE	BosSINEL	-	3
ctg29-18018979-18019347	76.9295	89.6574	61.1598	28.4976	0.000250236	0.0167908	KCTD14	21.58	-1.61474	0.034133	TRUE	FALSE	FALSE	TRUE	BosSINEL	-	11
ctg29-24940998-24941185	88.146	94.276	80.6013	13.6748	0.00307205	0.0476466	NAV2	249.072	-1.41299	0.00258762	TRUE	FALSE	TRUE	FALSE	BosSINE1	+	3
ctg29-24960383-24960609	85.1778	92.1871	76.5511	15.636	0.000311152	0.0180281	NAV2	249.072	-1.41299	0.00258762	TRUE	FALSE	TRUE	FALSE	BosSINE2	+	7
ctg29-25096593-25096728	49.8392	40.6602	61.1365	-20.4764	0.00124915	0.0309714	NAV2	249.072	-1.41299	0.00258762	TRUE	FALSE	TRUE	FALSE	BosSINE2	+	4
ctg29-25104537-25104706	91.3537	95.9396	85.7096	10.23	0.00178879	0.0363949	NAV2	249.072	-1.41299	0.00258762	TRUE	FALSE	TRUE	FALSE	BosSINE2	-	6
ctg29-25121170-25121369	72.6299	88.1646	55.0686	33.096	0.000311152	0.0180281	NAV2	249.072	-1.41299	0.00258762	TRUE	FALSE	TRUE	FALSE	BosSINE2	-	6
ctg29-32366247-32366446	86.4643	94.9299	75.9971	18.9329	0.0017067	0.0363949	ARHGAP32	142.059	-1.31774	0.0010485	TRUE	FALSE	TRUE	FALSE	BosSINE2	+	5
ctg29-32643130-32643253	76.133	87.4647	62.3783	25.0864	7.73607e-05	0.0124599	BARX2	19.2878	-1.77629	0.0252992	TRUE	FALSE	TRUE	FALSE	BosSINE2	-	4
ctg29-32743824-32744034	71.8073	77.0692	65.5771	11.4921	0.00149782	0.0334817	LOC101902145	6.04635	-3.23585	0.00188303	TRUE	TRUE	FALSE	FALSE	BosSINE3	+	4
ctg29-32767794-32768065	75.8633	87.0466	61.1092	25.9374	0.000473624	0.0209513	LOC101902145	6.04635	-3.23585	0.00188303	TRUE	FALSE	TRUE	FALSE	BosSINEL	+	6
ctg29-33825338-33825553	79.4156	84.7858	72.8037	11.9821	0.00298141	0.0468558	OPCML	5.12044	-3.21579	0.00637456	TRUE	FALSE	TRUE	FALSE	BosSINE2	-	5
ctg29-33863844-33863972	77.7454	84.1115	69.9103	14.2012	0.00252352	0.0430208	OPCML	5.12044	-3.21579	0.00637456	TRUE	FALSE	TRUE	FALSE	BosSINE5	-	3
ctg29-41965526-41965800	77.694	87.1984	67.2612	19.9372	0.00015926	0.0148443	PLA2G16	265.357	-1.42278	0.00623097	TRUE	FALSE	TRUE	FALSE	BosSINEL	+	7
ctg29-42329563-42329777	82.0934	90.1066	72.774	17.3326	0.000296533	0.0180281	MACROD1	103.472	-1.21827	0.00623568	TRUE	FALSE	TRUE	FALSE	BosSINE3	-	4
ctg29-42337129-42337334	56.3651	47.7325	67.1575	-19.425	0.00298141	0.0468558	MACROD1	103.472	-1.21827	0.00623568	TRUE	FALSE	TRUE	FALSE	BosSINE2	-	5
ctg29-43355712-43355923	88.0009	93.4203	81.3308	12.0895	5.9973e-05	0.011619	SPDYC	4.21933	-3.06881	0.0113164	TRUE	FALSE	TRUE	FALSE	BosSINE1	-	4
ctg29-43368600-43368874	84.0248	90.2575	76.108	14.1495	0.00158966	0.0351234	SPDYC	4.21933	-3.06881	0.0113164	TRUE	FALSE	TRUE	FALSE	BosSINEL	+	5
ctg29-43922786-43922888	87.0481	94.249	78.0296	16.2194	0.000176916	0.0158399	LOC101904071	3.82332	-2.70383	0.0289489	TRUE	FALSE	TRUE	FALSE	BosSINE6	-	3
ctg29-44944673-44944872	86.5386	92.3348	79.4048	12.93	0.00149782	0.0334817	PC	98.5664	-1.55188	9.94e-05	TRUE	FALSE	TRUE	FALSE	BosSINE2	+	8
ctg29-44966923-44967197	87.9776	93.3058	81.5493	11.7565	7.73607e-05	0.0124599	PC	98.5664	-1.55188	9.94e-05	TRUE	FALSE	FALSE	TRUE	BosSINEL	-	9
ctg29-45038239-45038438	89.2417	95.6119	81.3182	14.2938	0.000250236	0.0167908	RHOD	21.8051	-1.67927	0.00716428	TRUE	FALSE	FALSE	TRUE	BosSINE2	+	9
ctg29-45505975-45506095	24.1237	14.36	35.5141	-21.1541	0.00018896	0.0158399	LOC508879	232.537	-4.00708	2.92e-05	TRUE	FALSE	FALSE	TRUE	BosSINE6	+	3
ctg29-45569887-45570116	87.7678	96.3581	76.7431	19.615	0.000789641	0.026256	TCIRG1	5090.24	1.60764	0.000161331	TRUE	FALSE	TRUE	FALSE	BosSINE2	-	5
ctg29-45577771-45577906	83.8356	95.6719	69.2679	26.4039	0.00146817	0.0334817	TCIRG1	5090.24	1.60764	0.000161331	TRUE	TRUE	FALSE	FALSE	BosSINE6	+	3
ctg29-46212544-46212760	91.0907	98.0555	82.8669	15.1885	0.000697842	0.0243453	CPT1A	4586.73	1.12542	0.0185612	TRUE	FALSE	TRUE	FALSE	BosSINE3	+	5
ctg29-46214478-46214694	63.3308	72.5656	51.3028	21.2628	0.000707298	0.0243453	CPT1A	4586.73	1.12542	0.0185612	TRUE	FALSE	TRUE	FALSE	BosSINE2	-	4
ctg29-46309826-46310053	54.0022	47.1894	63.0987	-15.9093	0.00252352	0.0430208	LOC507247	397.936	3.04302	4.74e-05	TRUE	TRUE	FALSE	FALSE	BosSINE2	-	11
ctg29-46310244-46310445	82.0109	90.7201	71.35	19.3701	0.000250236	0.0167908	LOC507247	397.936	3.04302	4.74e-05	TRUE	TRUE	FALSE	FALSE	BosSINE3	+	6
ctg29-48031962-48032089	87.2767	91.9196	81.4779	10.4418	0.00212864	0.0396247	SHANK2	162.336	-2.97453	6.42e-05	TRUE	FALSE	TRUE	FALSE	BosSINE1	+	7
ctg29-48032726-48032926	81.8904	90.8777	70.6869	20.1908	0.00103778	0.0285926	SHANK2	162.336	-2.97453	6.42e-05	TRUE	FALSE	TRUE	FALSE	BosSINE3	-	7
ctg29-48040496-48040702	74.2933	80.1377	67.1438	12.9939	0.00298141	0.0468558	SHANK2	162.336	-2.97453	6.42e-05	TRUE	FALSE	TRUE	FALSE	BosSINE3	-	5
ctg29-48041575-48041776	73.5736	86.8542	57.2282	29.626	0.0017112	0.0363949	SHANK2	162.336	-2.97453	6.42e-05	TRUE	FALSE	TRUE	FALSE	BosSINE2	-	3
ctg29-48071711-48071830	65.6224	79.1269	46.3848	32.7421	2.80844e-05	0.0107389	SHANK2	162.336	-2.97453	6.42e-05	TRUE	FALSE	TRUE	FALSE	BosSINE6	-	3
ctg29-48088451-48088661	77.4073	84.8024	68.7038	16.0985	0.00103778	0.0285926	SHANK2	162.336	-2.97453	6.42e-05	TRUE	FALSE	TRUE	FALSE	BosSINE3	+	3
ctg29-48089474-48089651	81.658	90.6208	70.6269	19.9939	9.90217e-05	0.0132745	SHANK2	162.336	-2.97453	6.42e-05	TRUE	FALSE	TRUE	FALSE	BosSINEL	+	3
ctg29-48114818-48114964	87.4848	92.779	81.3808	11.3982	0.00178879	0.0363949	SHANK2	162.336	-2.97453	6.42e-05	TRUE	FALSE	TRUE	FALSE	BosSINE4	-	5
ctg29-48344997-48345193	85.8908	93.3328	76.6596	16.6731	0.000473624	0.0209513	LOC112444883	2.14189	-3.03054	0.045215	TRUE	FALSE	FALSE	TRUE	BosSINE3	+	4
ctg29-48449216-48449640	67.3732	72.6453	60.9083	11.737	0.000707298	0.0243453	OSBPL5	121.399	-1.03384	0.00148025	TRUE	FALSE	FALSE	TRUE	BosSINEL	-	12
ctg29-48491633-48491850	80.837	91.9787	69.7452	22.2335	0.000350963	0.0194558	OSBPL5	121.399	-1.03384	0.00148025	TRUE	FALSE	TRUE	FALSE	BosSINE3	-	4
ctg29-49140515-49140722	75.0093	82.5844	65.4415	17.1428	0.00312165	0.0483505	KCNQ1	5.27934	-4.25191	6.42e-05	TRUE	FALSE	FALSE	TRUE	BosSINE3	+	3
ctg29-50944278-50944405	15.9	3.04241	31.7247	-28.6823	0.000295004	0.0180281	LOC613699	126.275	3.21229	9.46e-06	TRUE	TRUE	FALSE	FALSE	BosSINEL	-	7
ctg29-50945603-50945903	63.6694	59.2353	69.249	-10.0136	0.00298141	0.0468558	LOC613699	126.275	3.21229	9.46e-06	TRUE	TRUE	FALSE	FALSE	BosSINEL	+	13
ctg29-50946468-50946634	82.4971	87.6073	76.2077	11.3996	0.00178879	0.0363949	LOC613699	126.275	3.21229	9.46e-06	TRUE	FALSE	FALSE	TRUE	BosSINE4	+	3
ctg29-6809759-6810014	42.0784	37.575	47.6212	-10.0462	0.00212864	0.0396247	GRM5	2.81272	-3.9596	0.0109836	TRUE	FALSE	TRUE	FALSE	BosSINEL	+	6
ctg29-7436921-7437130	49.9737	55.0203	43.7625	11.2578	0.000126017	0.013894	LOC104976218	4.85075	1.42805	0.0458419	TRUE	FALSE	TRUE	FALSE	BosSINE2	-	4
ctg29-8638400-8638583	47.0351	38.1351	57.9234	-19.7882	0.00149782	0.0334817	LOC101905908	3.38953	-3.56927	0.0053422	TRUE	TRUE	FALSE	FALSE	BosSINEL	-	7
ctg3-102146016-102146209	87.7819	95.8859	77.5098	18.3762	0.000955758	0.0285926	ST3GAL3	227.701	1.88394	0.000677163	TRUE	FALSE	TRUE	FALSE	BosSINE2	+	4
ctg3-104161343-104161617	86.0388	91.837	78.821	13.016	0.00038477	0.0194558	HIVEP3	2959.4	1.45161	0.000403808	TRUE	FALSE	TRUE	FALSE	BosSINEL	-	8
ctg3-104197052-104197171	84.3827	95.6929	70.6064	25.0865	0.00117239	0.0309714	HIVEP3	2959.4	1.45161	0.000403808	TRUE	FALSE	TRUE	FALSE	BosSINEL	-	6
ctg3-104284068-104284229	87.7033	93.4406	80.8135	12.6271	0.00178879	0.0363949	HIVEP3	2959.4	1.45161	0.000403808	TRUE	FALSE	TRUE	FALSE	BosSINE3	+	4
ctg3-104357763-104357986	70.147	80.0718	57.9835	22.0883	0.000707298	0.0243453	HIVEP3	2959.4	1.45161	0.000403808	TRUE	FALSE	TRUE	FALSE	BosSINE2	+	4
ctg3-104366874-104367149	88.2744	93.0721	82.8984	10.1737	0.000311152	0.0180281	HIVEP3	2959.4	1.45161	0.000403808	TRUE	FALSE	TRUE	FALSE	BosSINEL	+	7
ctg3-104580015-104580284	81.782	89.276	72.5415	16.7345	7.73607e-05	0.0124599	HIVEP3	2959.4	1.45161	0.000403808	TRUE	FALSE	TRUE	FALSE	BosSINEL	-	8
ctg3-104675154-104675369	47.2007	35.7762	61.2615	-25.4853	1.09926e-05	0.00901759	EDN2	12.9854	-2.52304	0.000161759	TRUE	FALSE	FALSE	TRUE	BosSINE2	-	5
ctg3-104703387-104703507	74.8677	88.1195	58.5577	29.5618	0.00178879	0.0363949	EDN2	12.9854	-2.52304	0.000161759	TRUE	FALSE	TRUE	FALSE	BosSINE3	-	4
ctg3-109473342-109473499	79.9386	89.6656	67.9669	21.6987	0.00178879	0.0363949	OSCP1	44.1079	1.69168	0.0222519	TRUE	TRUE	FALSE	FALSE	BosSINE2	+	5
ctg3-112362463-112362674	84.2621	95.5875	70.3231	25.2644	0.00038477	0.0194558	LOC104971852	3.80232	-3.37085	0.00124099	TRUE	FALSE	TRUE	FALSE	BosSINE3	+	3
ctg3-112398863-112399029	83.5609	93.6459	72.1978	21.4481	0.00306115	0.0476466	EFHD1	623.981	-4.52254	1.01e-06	TRUE	FALSE	TRUE	FALSE	BosSINE2	+	5
ctg3-112405448-112405673	78.2811	89.07	66.9837	22.0863	0.000148393	0.0148443	EFHD1	623.981	-4.52254	1.01e-06	TRUE	FALSE	TRUE	FALSE	BosSINE3	+	6
ctg3-112407702-112407829	82.6728	97.1805	65.3913	31.7891	0.00115214	0.0309714	EFHD1	623.981	-4.52254	1.01e-06	TRUE	FALSE	TRUE	FALSE	BosSINE6	+	4
ctg3-112417390-112417453	78.8908	94.5067	59.5211	34.9857	0.000450363	0.0209513	EFHD1	623.981	-4.52254	1.01e-06	TRUE	FALSE	TRUE	FALSE	BosSINE3	-	5
ctg3-112417465-112417613	89.7962	97.3226	80.7055	16.6171	0.000250089	0.0167908	EFHD1	623.981	-4.52254	1.01e-06	TRUE	FALSE	TRUE	FALSE	BosSINE2	+	6
ctg3-112422717-112422926	82.8609	93.7034	69.7744	23.929	0.000209401	0.0163489	EFHD1	623.981	-4.52254	1.01e-06	TRUE	FALSE	TRUE	FALSE	BosSINE3	-	3
ctg3-112427203-112427350	84.8095	94.4302	72.7753	21.6549	0.000707298	0.0243453	EFHD1	623.981	-4.52254	1.01e-06	TRUE	FALSE	TRUE	FALSE	BosSINE3	-	3
ctg3-112431715-112431794	87.0462	92.8781	79.8685	13.0097	0.000200254	0.0158399	EFHD1	623.981	-4.52254	1.01e-06	TRUE	FALSE	TRUE	FALSE	BosSINE3	-	5
ctg3-114538842-114539051	75.6092	87.7884	61.0494	26.739	0.000473624	0.0209513	SH3BP4	1115.72	-3.11518	4.36e-06	TRUE	TRUE	FALSE	FALSE	BosSINE3	+	6
ctg3-114544627-114544795	88.213	94.2971	80.9169	13.3802	8.01604e-06	0.00881238	SH3BP4	1115.72	-3.11518	4.36e-06	TRUE	TRUE	FALSE	FALSE	BosSINE2	-	5
ctg3-114546587-114546761	84.9477	90.6771	77.8962	12.7809	0.000126017	0.013894	SH3BP4	1115.72	-3.11518	4.36e-06	TRUE	TRUE	FALSE	FALSE	BosSINE5	-	3
ctg3-114557729-114557943	81.5831	89.8838	71.3669	18.5168	0.00124915	0.0309714	SH3BP4	1115.72	-3.11518	4.36e-06	TRUE	TRUE	FALSE	FALSE	BosSINE3	+	5
ctg3-114560795-114560993	73.9064	85.3118	59.8492	25.4626	4.62101e-05	0.0113782	SH3BP4	1115.72	-3.11518	4.36e-06	TRUE	TRUE	FALSE	FALSE	BosSINE2	-	4
ctg3-114565024-114565143	85.2132	89.8187	79.5449	10.2739	0.00103778	0.0285926	SH3BP4	1115.72	-3.11518	4.36e-06	TRUE	TRUE	FALSE	FALSE	BosSINEL	-	3
ctg3-114575149-114575431	84.0737	89.2883	77.6558	11.6325	0.000200254	0.0158399	SH3BP4	1115.72	-3.11518	4.36e-06	TRUE	FALSE	TRUE	FALSE	BosSINE1	-	8
ctg3-114599109-114599308	86.9031	91.4534	81.1799	10.2735	0.00038477	0.0194558	SH3BP4	1115.72	-3.11518	4.36e-06	TRUE	FALSE	TRUE	FALSE	BosSINE3	-	4
ctg3-115083948-115084046	87.1577	92.8922	81.5482	11.344	0.00265228	0.0446645	AGAP1	131.895	-1.29642	0.000465105	TRUE	FALSE	TRUE	FALSE	BosSINE3	-	4
ctg3-115083963-115084053	87.1577	92.8922	81.5482	11.344	0.00265228	0.0446645	AGAP1	131.895	-1.29642	0.000465105	TRUE	FALSE	TRUE	FALSE	BosSINE1	-	4
ctg3-115092216-115092415	54.0473	62.0386	44.5852	17.4535	0.000311152	0.0180281	AGAP1	131.895	-1.29642	0.000465105	TRUE	FALSE	TRUE	FALSE	BosSINE1	-	7
ctg3-115137268-115137473	76.8642	88.7812	61.9198	26.8615	0.000575562	0.0224556	AGAP1	131.895	-1.29642	0.000465105	TRUE	FALSE	TRUE	FALSE	BosSINE3	-	3
ctg3-115147892-115147966	70.5496	75.1367	64.9038	10.2329	0.00212864	0.0396247	AGAP1	131.895	-1.29642	0.000465105	TRUE	FALSE	TRUE	FALSE	BosSINE3	-	4
ctg3-115188801-115188999	85.9075	92.5334	77.7977	14.7357	0.000126017	0.013894	AGAP1	131.895	-1.29642	0.000465105	TRUE	FALSE	TRUE	FALSE	BosSINE3	+	5
ctg3-115212683-115212909	86.6529	92.0284	80.082	11.9464	1.49417e-05	0.0093863	AGAP1	131.895	-1.29642	0.000465105	TRUE	FALSE	TRUE	FALSE	BosSINE2	-	4
ctg3-115229267-115229478	82.4531	91.0726	71.7922	19.2803	9.90217e-05	0.0132745	AGAP1	131.895	-1.29642	0.000465105	TRUE	FALSE	TRUE	FALSE	BosSINE1	+	4
ctg3-115229292-115229493	82.4531	91.0726	71.7922	19.2803	9.90217e-05	0.0132745	AGAP1	131.895	-1.29642	0.000465105	TRUE	FALSE	TRUE	FALSE	BosSINE2	+	4
ctg3-115278289-115278476	84.5272	89.4594	78.4567	11.0026	0.00252352	0.0430208	AGAP1	131.895	-1.29642	0.000465105	TRUE	FALSE	TRUE	FALSE	BosSINE3	-	4
ctg3-115306159-115306375	59.1065	45.1385	74.7068	-29.5684	0.000477339	0.0210762	AGAP1	131.895	-1.29642	0.000465105	TRUE	FALSE	TRUE	FALSE	BosSINE2	+	3
ctg3-115350501-115350631	86.0086	93.2771	77.0628	16.2143	0.000580014	0.0224556	AGAP1	131.895	-1.29642	0.000465105	TRUE	FALSE	TRUE	FALSE	BosSINE2	+	6
ctg3-115512651-115512863	87.2359	91.9961	80.9632	11.0329	0.000858483	0.026256	AGAP1	131.895	-1.29642	0.000465105	TRUE	FALSE	TRUE	FALSE	BosSINE3	-	4
ctg3-118428877-118429072	85.8331	90.842	79.596	11.246	9.90217e-05	0.0132745	HDAC4	390.855	1.12722	0.00155561	TRUE	FALSE	TRUE	FALSE	BosSINE3	+	7
ctg3-118478410-118478628	29.6903	14.5183	48.1128	-33.5946	0.000311152	0.0180281	HDAC4	390.855	1.12722	0.00155561	TRUE	FALSE	TRUE	FALSE	BosSINE2	-	6
ctg3-118489496-118489574	77.0544	85.2301	67.1415	18.0886	0.00149782	0.0334817	HDAC4	390.855	1.12722	0.00155561	TRUE	FALSE	TRUE	FALSE	BosSINE3	-	5
ctg3-119455916-119456149	23.956	15.9071	33.3882	-17.481	0.00103778	0.0285926	LOC100336476	335.143	1.76863	0.000188788	TRUE	FALSE	TRUE	FALSE	BosSINEL	-	8
ctg3-119458744-119458901	26.7921	10.7888	46.4885	-35.6996	0.00015926	0.0148443	LOC100336476	335.143	1.76863	0.000188788	TRUE	FALSE	TRUE	FALSE	BosSINE2	-	7
ctg3-120265701-120265850	22.5971	6.80417	42.0346	-35.2304	3.40393e-05	0.0107934	SNED1	7.71771	-3.4559	0.00091584	TRUE	FALSE	TRUE	FALSE	BosSINE2	+	3
ctg3-120282445-120282708	73.5827	85.0926	60.7544	24.3382	0.00124915	0.0309714	SNED1	7.71771	-3.4559	0.00091584	TRUE	FALSE	TRUE	FALSE	BosSINEL	-	8
ctg3-13521628-13521832	85.9462	91.0478	79.8135	11.2343	0.00252352	0.0430208	LOC101906408	43.062	-2.69919	0.00396359	TRUE	FALSE	TRUE	FALSE	BosSINE2	+	4
ctg3-14546587-14546684	82.7422	94.1745	68.6718	25.5027	0.000200254	0.0158399	PAQR6	86.5312	1.03283	0.00864127	TRUE	TRUE	FALSE	FALSE	BosSINE6	-	6
ctg3-15969309-15969571	70.0822	80.1465	57.9808	22.1657	0.000707298	0.0243453	ADAR	3959.65	1.23407	0.00117174	TRUE	FALSE	TRUE	FALSE	BosSINEL	-	6
ctg3-16035328-16035543	87.7848	94.6332	79.4938	15.1394	0.00298141	0.0468558	TDRD10	15.9979	3.69833	0.000348537	TRUE	FALSE	TRUE	FALSE	BosSINE3	-	4
ctg3-16810521-16810746	80.2237	92.9738	65.6462	27.3277	0.00252352	0.0430208	S100A2	166.457	-1.53965	0.0271323	TRUE	FALSE	TRUE	FALSE	BosSINE2	-	5
ctg3-19009929-19010123	82.4241	90.6117	72.9769	17.6347	0.000108327	0.013894	TDRKH	5.28093	-2.86238	0.0314934	TRUE	TRUE	FALSE	FALSE	BosSINE3	-	4
ctg3-19271954-19272054	79.9002	93.4414	63.3645	30.0768	0.000311152	0.0180281	CGN	50.3297	-2.53818	0.00124958	TRUE	FALSE	TRUE	FALSE	BosSINE6	+	3
ctg3-20042528-20042796	89.9538	96.5006	81.8962	14.6045	4.11811e-05	0.0113782	GOLPH3L	430.887	-1.43318	0.00389519	TRUE	FALSE	TRUE	FALSE	BosSINEL	-	5
ctg3-23215385-23215514	85.8451	92.0922	78.1564	13.9358	0.000311152	0.0180281	NOTCH2	24212.1	1.31619	0.00286298	TRUE	FALSE	TRUE	FALSE	BosSINE2	-	6
ctg3-23337275-23337592	90.9994	95.7328	85.1594	10.5734	5.9973e-05	0.011619	NOTCH2	24212.1	1.31619	0.00286298	TRUE	FALSE	TRUE	FALSE	BosSINE1	-	4
ctg3-24206485-24206720	62.1303	68.8226	54.8256	13.997	0.00212864	0.0396247	TBX15	3.33672	-3.46037	0.0154885	TRUE	FALSE	TRUE	FALSE	BosSINE3	+	3
ctg3-27361664-27361850	65.1433	57.69	74.7386	-17.0486	0.00124915	0.0309714	SLC22A15	127.969	1.19293	0.00197763	TRUE	FALSE	TRUE	FALSE	BosSINE2	+	5
ctg3-30620774-30620968	82.4966	91.1734	71.8173	19.3561	0.00298141	0.0468558	RHOC	356.243	-2.69327	7.83e-06	TRUE	FALSE	TRUE	FALSE	BosSINE3	-	4
ctg3-30826827-30827040	66.7112	74.1291	57.6624	16.4666	0.00124915	0.0309714	ST7L	412.827	1.44826	0.000466002	TRUE	FALSE	TRUE	FALSE	BosSINE3	-	5
ctg3-31459171-31459299	87.3009	94.5245	78.4942	16.0303	0.0024763	0.0430208	KCND3	3.67929	-2.3943	0.0272444	TRUE	FALSE	TRUE	FALSE	BosSINE3	+	4
ctg3-31486925-31487175	86.2893	91.4507	79.867	11.5837	0.000858436	0.026256	KCND3	3.67929	-2.3943	0.0272444	TRUE	FALSE	TRUE	FALSE	BosSINE2	+	3
ctg3-32531209-32531434	16.6306	9.06	25.4753	-16.4153	0.000286255	0.0180281	CD53	5075.22	1.19305	0.00525316	TRUE	FALSE	TRUE	FALSE	BosSINEL	-	6
ctg3-33684388-33684652	82.4239	93.5334	68.1265	25.4068	1.09926e-05	0.00901759	LOC615514	4.88263	-4.30747	0.000891878	TRUE	FALSE	TRUE	FALSE	BosSINEL	-	9
ctg3-33686570-33686886	82.6152	94.52	68.2041	26.3159	0.00232758	0.0423188	LOC615514	4.88263	-4.30747	0.000891878	TRUE	FALSE	FALSE	TRUE	BosSINE1	-	3
ctg3-39852576-39852790	89.9178	96.9969	81.2051	15.7917	0.00199161	0.0394807	RNPC3	418.637	1.46256	0.00578517	TRUE	FALSE	TRUE	FALSE	BosSINE3	-	3
ctg3-43434018-43434315	80.5059	88.9195	70.1461	18.7735	0.000707298	0.0243453	FRRS1	17.1971	-1.30488	0.00826208	TRUE	TRUE	FALSE	FALSE	BosSINEL	+	11
ctg3-4392485-4392691	80.3075	87.4099	72.2894	15.1204	0.00286031	0.0468558	PBX1	115.269	-3.63205	1.31e-05	TRUE	FALSE	TRUE	FALSE	BosSINE1	-	4
ctg3-4399430-4399705	84.4359	89.5569	78.1102	11.4467	0.000580014	0.0224556	PBX1	115.269	-3.63205	1.31e-05	TRUE	FALSE	TRUE	FALSE	BosSINEL	+	11
ctg3-48434825-48435100	73.7732	84.2253	60.8335	23.3919	0.000473624	0.0209513	ALG14	124.614	-1.04369	0.000609136	TRUE	FALSE	TRUE	FALSE	BosSINEL	+	10
ctg3-48482115-48482386	86.5064	92.5455	79.2252	13.3202	0.00286031	0.0468558	ALG14	124.614	-1.04369	0.000609136	TRUE	FALSE	TRUE	FALSE	BosSINEL	-	9
ctg3-48655400-48655532	87.8484	95.9526	78.1269	17.8257	0.000349194	0.0194558	SLC44A3	79.564	-2.3307	4.88e-05	TRUE	FALSE	TRUE	FALSE	BosSINEL	-	4
ctg3-50039937-50040203	89.5527	94.1751	83.797	10.378	0.000250236	0.0167908	FNBP1L	390.263	-1.70042	0.002399	TRUE	FALSE	TRUE	FALSE	BosSINEL	+	8
ctg3-51635151-51635353	85.5586	91.6016	78.1212	13.4804	3.52765e-05	0.0107934	TGFBR3	702.559	-2.17307	0.00263788	TRUE	FALSE	TRUE	FALSE	BosSINE2	+	6
ctg3-51658947-51659161	77.2132	88.7956	62.7989	25.9967	0.00158966	0.0351234	TGFBR3	702.559	-2.17307	0.00263788	TRUE	FALSE	TRUE	FALSE	BosSINE2	-	4
ctg3-55036716-55036982	25.4556	13.4938	40.38	-26.8862	0.00252352	0.0430208	GTF2B	514.234	1.44192	0.0016277	TRUE	FALSE	TRUE	FALSE	BosSINEL	-	7
ctg3-58756660-58756797	15.3481	2.47461	31.3325	-28.8579	0.000133609	0.0146583	DDAH1	266.677	-6.13452	6.76e-08	TRUE	FALSE	TRUE	FALSE	BosSINEL	-	8
ctg3-62567483-62567775	79.6702	84.6007	73.8592	10.7414	3.52765e-05	0.0107934	ADGRL2	105.956	-2.75838	0.000654704	TRUE	FALSE	TRUE	FALSE	BosSINEL	-	5
ctg3-62860619-62860852	65.0374	72.0083	56.4577	15.5506	0.000473624	0.0209513	ADGRL2	105.956	-2.75838	0.000654704	TRUE	FALSE	TRUE	FALSE	BosSINE3	+	3
ctg3-67649032-67649232	78.9784	84.2648	72.4548	11.81	0.00124915	0.0309714	ST6GALNAC5	22.6039	-4.82474	0.00176497	TRUE	FALSE	TRUE	FALSE	BosSINE2	+	4
ctg3-68646402-68646524	81.3056	86.2008	75.2808	10.92	0.00015926	0.0148443	ST6GALNAC3	62.3929	-4.62492	0.000250685	TRUE	FALSE	TRUE	FALSE	BosSINE6	+	4
ctg3-68692254-68692392	86.4768	90.9844	80.4667	10.5177	0.00181226	0.0368407	ST6GALNAC3	62.3929	-4.62492	0.000250685	TRUE	FALSE	TRUE	FALSE	BosSINEL	+	3
ctg3-74343626-74343850	82.0084	87.3937	75.5692	11.8245	0.00103778	0.0285926	PTGER3	6.62025	-1.95457	0.0251162	TRUE	FALSE	TRUE	FALSE	BosSINEL	+	6
ctg3-77115380-77115700	79.0539	85.1437	71.5587	13.5851	0.000311152	0.0180281	WLS	4906.84	3.02859	3.37e-05	TRUE	FALSE	TRUE	FALSE	BosSINE1	-	4
ctg3-776238-776471	90.5629	95.9867	83.8875	12.0992	0.00136453	0.0331412	MPC2	179.391	-1.9692	0.000479079	TRUE	FALSE	TRUE	FALSE	BosSINE1	-	4
ctg3-78605784-78605969	51.0838	55.9135	45.2174	10.6962	0.00212864	0.0396247	SGIP1	27.3077	1.12236	0.0344574	TRUE	FALSE	TRUE	FALSE	BosSINEL	+	6
ctg3-79040199-79040470	61.2711	56.779	66.8009	-10.0218	0.00103778	0.0285926	PDE4B	8845.65	1.925	0.000571231	TRUE	FALSE	TRUE	FALSE	BosSINEL	+	9
ctg3-79067312-79067535	88.4946	93.0349	82.9115	10.1234	7.73607e-05	0.0124599	PDE4B	8845.65	1.925	0.000571231	TRUE	FALSE	TRUE	FALSE	BosSINE2	-	5
ctg3-79109844-79110102	50.0309	41.3901	60.4641	-19.074	0.000473624	0.0209513	PDE4B	8845.65	1.925	0.000571231	TRUE	FALSE	TRUE	FALSE	BosSINEL	-	9
ctg3-79110799-79111011	63.2262	67.8824	57.7385	10.144	0.00158966	0.0351234	PDE4B	8845.65	1.925	0.000571231	TRUE	FALSE	TRUE	FALSE	BosSINE2	+	3
ctg3-80846428-80846609	76.6862	85.1979	66.2103	18.9877	0.00038477	0.0194558	CACHD1	63.636	-2.91146	0.000103635	TRUE	FALSE	TRUE	FALSE	BosSINE4	-	3
ctg3-80901958-80902093	77.9987	88.8359	64.6606	24.1754	0.000858483	0.026256	CACHD1	63.636	-2.91146	0.000103635	TRUE	FALSE	TRUE	FALSE	BosSINE3	-	4
ctg3-80976398-80976662	83.633	90.4177	75.2827	15.135	0.000858483	0.026256	CACHD1	63.636	-2.91146	0.000103635	TRUE	FALSE	TRUE	FALSE	BosSINEL	+	6
ctg3-80999259-80999467	81.4696	92.2485	68.7654	23.4832	0.000148393	0.0148443	CACHD1	63.636	-2.91146	0.000103635	TRUE	FALSE	TRUE	FALSE	BosSINE3	+	3
ctg3-81363764-81363897	80.9461	91.393	68.0885	23.3045	9.90217e-05	0.0132745	ROR1	11.3515	-2.37372	0.00431153	TRUE	FALSE	TRUE	FALSE	BosSINEL	-	4
ctg3-83877000-83877062	86.1623	81.2747	91.9097	-10.635	0.00126597	0.0309714	PATJ	325.221	-3.28471	2.18e-05	TRUE	FALSE	TRUE	FALSE	BosSINE3	-	3
ctg3-83931757-83931957	86.307	94.1314	76.0878	18.0436	0.000349194	0.0194558	PATJ	325.221	-3.28471	2.18e-05	TRUE	FALSE	TRUE	FALSE	BosSINE2	+	3
ctg3-84225986-84226122	32.5132	18.7226	49.0723	-30.3497	3.52765e-05	0.0107934	NFIA	245.238	-1.59525	0.00799438	TRUE	FALSE	TRUE	FALSE	BosSINE6	-	5
ctg3-8435216-8435429	35.2628	26.9728	45.3974	-18.4246	0.000250236	0.0167908	USF1	558.891	1.03429	0.000321423	TRUE	FALSE	FALSE	TRUE	BosSINE2	+	3
ctg3-84375097-84375310	87.6822	92.6739	81.6885	10.9855	0.000311152	0.0180281	NFIA	245.238	-1.59525	0.00799438	TRUE	FALSE	TRUE	FALSE	BosSINE2	+	5
ctg3-84387645-84387852	90.4506	95.2479	84.4161	10.8318	0.000200254	0.0158399	NFIA	245.238	-1.59525	0.00799438	TRUE	FALSE	TRUE	FALSE	BosSINE2	-	3
ctg3-84493083-84493138	79.4075	88.6604	68.0192	20.6412	0.000449632	0.0209513	NFIA	245.238	-1.59525	0.00799438	TRUE	FALSE	TRUE	FALSE	BosSINE3	-	3
ctg3-84509736-84509920	77.2305	88.8378	63.0487	25.7891	0.000488955	0.0212516	NFIA	245.238	-1.59525	0.00799438	TRUE	FALSE	TRUE	FALSE	BosSINE3	-	3
ctg3-84511017-84511231	79.6755	94.4974	61.8256	32.6718	2.30751e-05	0.0103792	NFIA	245.238	-1.59525	0.00799438	TRUE	FALSE	TRUE	FALSE	BosSINE3	-	3
ctg3-84538659-84538919	89.2027	94.7817	82.4786	12.3032	0.00178879	0.0363949	NFIA	245.238	-1.59525	0.00799438	TRUE	FALSE	TRUE	FALSE	BosSINEL	+	7
ctg3-86637129-86637334	92.5527	98.0274	86.4817	11.5457	0.00105618	0.0290529	FGGY	245.308	1.48747	0.00116819	TRUE	FALSE	TRUE	FALSE	BosSINE3	+	7
ctg3-86642712-86642918	82.846	93.7313	69.4487	24.2825	0.000924575	0.0278673	FGGY	245.308	1.48747	0.00116819	TRUE	FALSE	TRUE	FALSE	BosSINE3	-	3
ctg3-8720904-8721120	91.6351	97.4272	84.8218	12.6054	0.00260089	0.0442301	CD244	296.332	1.07639	0.0436401	TRUE	FALSE	TRUE	FALSE	BosSINE2	-	5
ctg3-87456954-87457113	57.7891	64.7713	49.2875	15.4838	0.00212864	0.0396247	TACSTD2	1016.82	-3.33387	4.38e-06	TRUE	FALSE	FALSE	TRUE	BosSINE2	+	4
ctg3-89550455-89550648	82.8731	90.2246	73.7867	16.4379	1.09926e-05	0.00901759	PRKAA2	304.947	-5.54834	1.74e-08	TRUE	FALSE	FALSE	TRUE	BosSINE3	+	6
ctg3-9075164-9075373	87.2822	92.9125	80.3526	12.5599	0.00124915	0.0309714	CD84	632.934	-1.38479	0.000999919	TRUE	FALSE	FALSE	TRUE	BosSINE2	+	3
ctg3-91958186-91958269	18.4393	7.59911	31.3155	-23.7164	0.00169322	0.0363949	SSBP3	219.532	-1.40568	0.00572834	TRUE	FALSE	TRUE	FALSE	BosSINE3	-	4
ctg3-96449189-96449413	74.1433	78.7365	68.5309	10.2056	0.00178879	0.0363949	BEND5	21.6081	-2.28726	0.00606974	TRUE	FALSE	TRUE	FALSE	BosSINE2	-	4
ctg3-96700723-96700930	62.7791	68.4724	55.9126	12.5598	0.000858483	0.026256	BEND5	21.6081	-2.28726	0.00606974	TRUE	FALSE	TRUE	FALSE	BosSINE2	-	3
ctg3-96889018-96889214	79.4482	84.7993	72.8831	11.9161	0.0013664	0.0331412	BEND5	21.6081	-2.28726	0.00606974	TRUE	FALSE	TRUE	FALSE	BosSINE3	+	5
ctg3-97473140-97473409	83.9623	91.631	75.6204	16.0106	0.00107135	0.0293547	BEND5	21.6081	-2.28726	0.00606974	TRUE	TRUE	TRUE	FALSE	BosSINEL	+	5
ctg3-97516102-97516290	82.0293	91.9144	70.6325	21.2819	9.90217e-05	0.0132745	BEND5	21.6081	-2.28726	0.00606974	TRUE	FALSE	TRUE	FALSE	BosSINE3	-	3
ctg3-98305072-98305272	70.6887	75.4383	64.6034	10.8348	0.000473624	0.0209513	TRABD2B	56.5043	-3.14799	6.47e-06	TRUE	FALSE	TRUE	FALSE	BosSINE2	-	4
ctg3-98364917-98365110	69.7414	76.2331	62.0434	14.1897	0.00298141	0.0468558	TRABD2B	56.5043	-3.14799	6.47e-06	TRUE	FALSE	TRUE	FALSE	BosSINE3	+	7
ctg3-98428243-98428321	88.7497	96.4513	79.2708	17.1805	0.000656807	0.0243453	TRABD2B	56.5043	-3.14799	6.47e-06	TRUE	FALSE	TRUE	FALSE	BosSINE3	+	5
ctg30-105718125-105718386	75.579	81.5219	68.0143	13.5076	0.000311152	0.0180281	XK	162.37	-4.67507	6.58e-07	TRUE	FALSE	TRUE	FALSE	BosSINEL	-	6
ctg30-119341869-119341965	77.9238	83.8656	70.6108	13.2549	9.90217e-05	0.0132745	APOO	71.1185	-1.32635	0.000309656	TRUE	FALSE	TRUE	FALSE	BosSINE2	+	5
ctg30-125663837-125664110	82.3762	87.5081	76.06	11.4481	0.000858483	0.026256	RAI2	11.9967	-3.32295	0.00917503	TRUE	FALSE	TRUE	FALSE	BosSINEL	+	5
ctg30-132197055-132197211	69.8092	76.3302	61.7833	14.5469	0.00178879	0.0363949	MID1	351.074	-4.30866	5.51e-06	TRUE	FALSE	TRUE	FALSE	BosSINE3	-	3
ctg30-132265802-132266013	55.5328	63.8324	45.5351	18.2973	0.000580014	0.0224556	MID1	351.074	-4.30866	5.51e-06	TRUE	FALSE	TRUE	FALSE	BosSINE2	+	4
ctg30-133235557-133235830	77.515	90.051	63.5413	26.5096	0.000126017	0.013894	SHROOM2	33.5825	-2.86161	1.21e-05	TRUE	FALSE	TRUE	FALSE	BosSINEL	-	8
ctg30-138625043-138625224	87.9318	92.8374	81.824	11.0135	0.00307205	0.0476466	ARSH	4.46346	-2.12848	0.00963002	TRUE	FALSE	TRUE	FALSE	BosSINE3	+	4
ctg30-138633381-138633568	75.7613	90.194	57.8516	32.3424	0.000126017	0.013894	ARSH	4.46346	-2.12848	0.00963002	TRUE	FALSE	TRUE	FALSE	BosSINE2	-	11
ctg30-138634108-138634312	72.4735	87.0469	55.0644	31.9825	0.00149782	0.0334817	ARSH	4.46346	-2.12848	0.00963002	TRUE	FALSE	TRUE	FALSE	BosSINE2	-	8
ctg30-16267367-16267543	85.9615	91.9375	78.2067	13.7308	0.000200254	0.0158399	MBNL3	416.311	-1.17244	0.00189642	TRUE	FALSE	TRUE	FALSE	BosSINE3	-	5
ctg30-31574597-31574788	86.4944	92.3026	80.319	11.9836	0.00146927	0.0334817	AFF2	124.371	1.47515	0.00195648	TRUE	FALSE	TRUE	FALSE	BosSINE3	-	3
ctg30-33133939-33134129	66.2555	77.099	51.852	25.2469	0.000200254	0.0158399	MAMLD1	207.391	-3.28157	1.4e-05	TRUE	FALSE	TRUE	FALSE	BosSINE2	+	3
ctg30-3394834-3394900	83.7529	89.9125	76.1718	13.7407	9.90217e-05	0.0132745	LONRF3	1963.92	1.15571	0.00176584	TRUE	FALSE	TRUE	FALSE	BosSINE1	-	3
ctg30-53097165-53097475	78.2915	84.4689	70.4388	14.0301	0.000126017	0.013894	IL1RAPL2	2.50637	-2.39005	0.0375096	TRUE	TRUE	FALSE	FALSE	BosSINE1	-	4
ctg30-53177676-53177901	56.5537	62.3552	48.7758	13.5795	0.00214001	0.0396247	IL1RAPL2	2.50637	-2.39005	0.0375096	TRUE	FALSE	TRUE	FALSE	BosSINE2	+	3
ctg30-53197846-53198063	53.6455	58.9009	47.1419	11.759	0.00212864	0.0396247	IL1RAPL2	2.50637	-2.39005	0.0375096	TRUE	FALSE	TRUE	FALSE	BosSINE2	-	3
ctg30-54106556-54106735	69.3781	73.9653	63.7002	10.2651	0.00178879	0.0363949	IL1RAPL2	2.50637	-2.39005	0.0375096	TRUE	FALSE	TRUE	FALSE	BosSINE3	+	3
ctg30-54187711-54187929	72.2102	77.4997	65.325	12.1747	0.00108524	0.0293547	IL1RAPL2	2.50637	-2.39005	0.0375096	TRUE	FALSE	TRUE	FALSE	BosSINEL	-	3
ctg30-54323311-54323586	65.134	71.8713	57.2641	14.6072	0.000580014	0.0224556	IL1RAPL2	2.50637	-2.39005	0.0375096	TRUE	FALSE	TRUE	FALSE	BosSINEL	+	5
ctg30-54443956-54444274	76.7721	81.5322	71.1761	10.3561	0.00015926	0.0148443	IL1RAPL2	2.50637	-2.39005	0.0375096	TRUE	FALSE	TRUE	FALSE	BosSINE1	+	5
ctg30-59600223-59600439	65.8342	75.9336	55.0457	20.8879	0.000580014	0.0224556	DCX	18.3336	-2.54523	0.00091446	TRUE	FALSE	TRUE	FALSE	BosSINE3	-	6
ctg30-76274289-76274505	73.2995	78.0385	67.1635	10.8749	0.00298141	0.0468558	NEXMIF	33.9858	-2.00375	0.00422865	TRUE	FALSE	TRUE	FALSE	BosSINE3	-	4
ctg30-8874415-8874630	64.9639	76.2667	52.7859	23.4808	1.09926e-05	0.00901759	TENM1	16.422	1.68169	0.0330081	TRUE	FALSE	TRUE	FALSE	BosSINE3	-	3
ctg30-9455469-9455676	61.3981	68.7436	53.2106	15.5331	7.73607e-05	0.0124599	TENM1	16.422	1.68169	0.0330081	TRUE	FALSE	TRUE	FALSE	BosSINE1	+	4
ctg30-9525409-9525684	65.0239	71.0861	57.8409	13.2452	0.00178879	0.0363949	TENM1	16.422	1.68169	0.0330081	TRUE	FALSE	TRUE	FALSE	BosSINEL	+	8
ctg30-99946580-99946776	74.042	79.7438	67.0244	12.7194	0.00178879	0.0363949	MAOA	261.872	1.41151	0.000923725	TRUE	FALSE	TRUE	FALSE	BosSINE2	-	3
ctg4-100725307-100725501	84.716	90.7345	77.7498	12.9847	0.00220078	0.0406247	CHRM2	3.02095	-2.91209	0.00858411	TRUE	FALSE	TRUE	FALSE	BosSINE2	+	3
ctg4-103359585-103359661	82.7247	95.4958	67.0064	28.4894	0.00204647	0.0396247	TBXAS1	332.035	1.47425	0.0413643	TRUE	FALSE	TRUE	FALSE	BosSINE3	-	3
ctg4-103367729-103367943	75.8926	82.8337	66.8859	15.9478	0.00178879	0.0363949	TBXAS1	332.035	1.47425	0.0413643	TRUE	FALSE	TRUE	FALSE	BosSINE3	-	5
ctg4-103461986-103462102	80.1615	89.4458	68.7346	20.7112	0.000350963	0.0194558	TBXAS1	332.035	1.47425	0.0413643	TRUE	FALSE	TRUE	FALSE	BosSINE6	+	3
ctg4-105288337-105288531	87.4747	92.2567	81.6885	10.5683	0.00307205	0.0476466	MGAM	342.927	1.79975	0.00808391	TRUE	FALSE	TRUE	FALSE	BosSINE1	+	3
ctg4-106196969-106197193	77.495	87.9095	64.8627	23.0468	0.000473624	0.0209513	TRPV6	42.8142	-3.63221	5.1e-05	TRUE	FALSE	TRUE	FALSE	BosSINE2	+	4
ctg4-107012569-107012794	88.0576	92.6258	82.4354	10.1904	0.00103778	0.0285926	TCAF2	40.1672	-1.31492	0.0278353	TRUE	FALSE	TRUE	FALSE	BosSINE2	+	7
ctg4-107025252-107025434	86.3761	91.2282	80.4605	10.7677	0.00103778	0.0285926	TCAF1	99.1653	-2.63294	2.08e-05	TRUE	FALSE	TRUE	FALSE	BosSINE2	-	3
ctg4-107639085-107639357	87.1373	81.842	92.6744	-10.8324	0.00147414	0.0334817	ARHGEF5	137.064	-3.42303	1.52e-05	TRUE	FALSE	TRUE	FALSE	BosSINEL	+	4
ctg4-109511450-109511654	64.3356	74.8217	52.5115	22.3102	0.000250236	0.0167908	CNTNAP2	4.56782	-2.63654	0.0302098	TRUE	FALSE	TRUE	FALSE	BosSINE3	+	3
ctg4-109817477-109817561	64.7218	74.8573	52.2474	22.6099	0.000200254	0.0158399	CNTNAP2	4.56782	-2.63654	0.0302098	TRUE	FALSE	TRUE	FALSE	BosSINE3	-	3
ctg4-110479383-110479585	70.4414	75.3167	64.3787	10.938	0.000707298	0.0243453	CNTNAP2	4.56782	-2.63654	0.0302098	TRUE	FALSE	TRUE	FALSE	BosSINE2	-	4
ctg4-110733841-110734144	61.217	69.2823	51.4747	17.8076	7.73607e-05	0.0124599	CNTNAP2	4.56782	-2.63654	0.0302098	TRUE	FALSE	TRUE	FALSE	BosSINE1	+	5
ctg4-110773146-110773360	71.8441	78.8143	63.7131	15.1012	0.0004339	0.0209513	CNTNAP2	4.56782	-2.63654	0.0302098	TRUE	FALSE	TRUE	FALSE	BosSINE3	-	3
ctg4-114494367-114494566	86.1132	93.3223	77.6896	15.6327	0.00224827	0.0414285	GALNTL5	8.3255	2.93307	0.0148166	TRUE	FALSE	TRUE	FALSE	BosSINE2	+	3
ctg4-114507470-114507590	33.9601	23.4176	46.7656	-23.348	0.000580014	0.0224556	GALNTL5	8.3255	2.93307	0.0148166	TRUE	FALSE	TRUE	FALSE	BosSINE6	+	3
ctg4-114849487-114849636	82.0523	91.4844	70.4436	21.0408	0.00307205	0.0476466	KMT2C	4981.66	1.05522	0.000422735	TRUE	FALSE	TRUE	FALSE	BosSINE5	-	3
ctg4-115055073-115055278	71.8346	80.0027	62.0103	17.9923	0.000580014	0.0224556	XRCC2	27.1174	-1.21032	0.00528392	TRUE	FALSE	FALSE	TRUE	BosSINE1	+	6
ctg4-119642259-119642456	89.1328	93.9	83.2654	10.6346	0.00178879	0.0363949	VIPR2	55.5883	1.1229	0.0447331	TRUE	FALSE	TRUE	FALSE	BosSINE2	-	3
ctg4-12316039-12316255	72.7082	84.4576	58.5769	25.8806	0.000580014	0.0224556	PPP1R9A	220.702	1.08296	0.0147509	TRUE	FALSE	TRUE	FALSE	BosSINE2	-	3
ctg4-12470474-12470686	39.0712	28.4603	52.05	-23.5897	0.000126017	0.013894	PPP1R9A	220.702	1.08296	0.0147509	TRUE	FALSE	TRUE	FALSE	BosSINE2	+	9
ctg4-16304821-16304935	83.0862	94.2001	69.6436	24.5565	0.000792006	0.026256	ICA1	114.032	-1.51621	0.000709934	TRUE	FALSE	TRUE	FALSE	BosSINE2	+	3
ctg4-28806177-28806402	15.5345	9.44571	22.7192	-13.2735	0.000858483	0.026256	MACC1	140.496	-2.20403	0.00221959	TRUE	FALSE	TRUE	FALSE	BosSINE2	+	7
ctg4-31004121-31004396	85.2212	89.741	79.4324	10.3085	0.000311152	0.0180281	RAPGEF5	32.4087	-3.33634	0.000261939	TRUE	FALSE	TRUE	FALSE	BosSINEL	-	7
ctg4-31033996-31034117	81.7091	91.3578	69.8337	21.5242	0.000676282	0.0243453	RAPGEF5	32.4087	-3.33634	0.000261939	TRUE	FALSE	TRUE	FALSE	BosSINE6	+	4
ctg4-36335747-36336044	85.0164	90.6927	78.1085	12.5842	1.49417e-05	0.0093863	SEMA3A	250.757	-1.97733	0.000220468	TRUE	FALSE	TRUE	FALSE	BosSINEL	-	9
ctg4-36526442-36526652	81.9727	91.7175	70.522	21.1955	0.0017067	0.0363949	SEMA3A	250.757	-1.97733	0.000220468	TRUE	FALSE	TRUE	FALSE	BosSINE3	-	4
ctg4-37161817-37162087	80.5011	87.4896	71.9717	15.5179	0.000311152	0.0180281	SEMA3E	3.22716	-3.35902	0.0101085	TRUE	FALSE	TRUE	FALSE	BosSINEL	-	4
ctg4-43835552-43835748	91.9797	96.9164	85.9038	11.0126	0.00134778	0.0329154	GSAP	2121.43	2.24621	4.3e-06	TRUE	FALSE	TRUE	FALSE	BosSINE3	+	4
ctg4-43853736-43853921	85.0615	92.7463	75.6072	17.1391	0.000200254	0.0158399	GSAP	2121.43	2.24621	4.3e-06	TRUE	FALSE	TRUE	FALSE	BosSINE1	-	4
ctg4-43865582-43865703	74.5557	67.8237	83.8911	-16.0675	0.000580014	0.0224556	GSAP	2121.43	2.24621	4.3e-06	TRUE	FALSE	TRUE	FALSE	BosSINE2	-	3
ctg4-43890689-43890893	81.3109	94.6844	64.8513	29.8331	0.000350963	0.0194558	GSAP	2121.43	2.24621	4.3e-06	TRUE	FALSE	TRUE	FALSE	BosSINE3	+	3
ctg4-43914087-43914344	83.6463	89.4568	76.6331	12.8237	0.00178879	0.0363949	GSAP	2121.43	2.24621	4.3e-06	TRUE	TRUE	FALSE	FALSE	BosSINEL	+	5
ctg4-43919525-43919788	85.6194	94.6112	74.2454	20.3658	0.000311152	0.0180281	CCDC146	14.1458	1.75369	0.00609144	TRUE	FALSE	TRUE	FALSE	BosSINEL	-	10
ctg4-44025918-44026181	76.848	86.0888	65.5703	20.5186	0.00038477	0.0194558	CCDC146	14.1458	1.75369	0.00609144	TRUE	FALSE	TRUE	FALSE	BosSINEL	+	7
ctg4-4744048-4744242	80.6659	91.2031	67.6971	23.506	0.000200254	0.0158399	COBL	35.8819	-3.31702	0.000146542	TRUE	FALSE	TRUE	FALSE	BosSINE3	+	4
ctg4-48184159-48184373	81.5137	92.1883	68.4317	23.7566	0.00298141	0.0468558	PRKAR2B	107.9	-1.75851	0.0109536	TRUE	FALSE	TRUE	FALSE	BosSINE3	-	4
ctg4-48220199-48220616	85.6305	92.5334	77.2667	15.2667	0.00124915	0.0309714	PRKAR2B	107.9	-1.75851	0.0109536	TRUE	FALSE	TRUE	FALSE	BosSINEL	-	8
ctg4-48223278-48223487	91.6503	96.6925	85.4446	11.2479	0.000707298	0.0243453	PRKAR2B	107.9	-1.75851	0.0109536	TRUE	FALSE	TRUE	FALSE	BosSINE2	-	5
ctg4-49460917-49461132	60.2014	69.6977	48.1841	21.5135	0.00252352	0.0430208	NRCAM	22.9227	-3.26232	0.00225223	TRUE	FALSE	TRUE	FALSE	BosSINE2	-	4
ctg4-51699817-51700066	77.1948	87.6769	64.2938	23.383	0.000311152	0.0180281	MET	318.947	-3.15096	2.42e-06	TRUE	FALSE	TRUE	FALSE	BosSINEL	+	5
ctg4-51713353-51713624	83.6402	89.6936	76.2778	13.4158	0.000250236	0.0167908	MET	318.947	-3.15096	2.42e-06	TRUE	FALSE	TRUE	FALSE	BosSINEL	+	10
ctg4-51724430-51724684	86.3566	91.7202	79.9479	11.7723	0.00038477	0.0194558	MET	318.947	-3.15096	2.42e-06	TRUE	FALSE	TRUE	FALSE	BosSINEL	+	7
ctg4-51728614-51728887	76.66	87.5252	64.1736	23.3516	3.52765e-05	0.0107934	MET	318.947	-3.15096	2.42e-06	TRUE	FALSE	TRUE	FALSE	BosSINEL	+	6
ctg4-53787914-53788137	61.904	71.2958	50.3449	20.951	0.000707298	0.0243453	FOXP2	9.22683	-1.63468	0.0331084	TRUE	FALSE	TRUE	FALSE	BosSINE3	-	3
ctg4-53927803-53928023	83.1254	78.6127	88.73	-10.1172	0.0024763	0.0430208	FOXP2	9.22683	-1.63468	0.0331084	TRUE	FALSE	TRUE	FALSE	BosSINE2	+	3
ctg4-54334375-54334655	66.6046	72.0385	59.9167	12.1219	0.000200254	0.0158399	FOXP2	9.22683	-1.63468	0.0331084	TRUE	FALSE	TRUE	FALSE	BosSINE1	+	3
ctg4-59693122-59693390	41.8166	33.2803	52.3005	-19.0202	9.90217e-05	0.0132745	GPR141	203.711	2.48002	5.6e-05	TRUE	FALSE	TRUE	FALSE	BosSINEL	-	8
ctg4-59693788-59694087	28.0645	15.8066	42.8291	-27.0224	1.49417e-05	0.0093863	GPR141	203.711	2.48002	5.6e-05	TRUE	FALSE	TRUE	FALSE	BosSINE1	+	5
ctg4-59694413-59694689	68.2496	61.3708	76.67	-15.2992	2.67594e-05	0.0103792	GPR141	203.711	2.48002	5.6e-05	TRUE	FALSE	TRUE	FALSE	BosSINEL	+	7
ctg4-60637980-60638246	92.318	97.1828	86.428	10.7548	0.00103778	0.0285926	AOAH	500.73	2.10993	2.47e-05	TRUE	FALSE	TRUE	FALSE	BosSINEL	-	7
ctg4-63771494-63771764	60.6252	55.8346	66.67	-10.8354	0.000580014	0.0224556	NT5C3A	236.551	1.06772	0.00824459	TRUE	FALSE	TRUE	FALSE	BosSINEL	-	8
ctg4-68653313-68653530	78.1458	72.2286	85.2957	-13.0671	7.73607e-05	0.0124599	HIBADH	702.505	-2.33416	0.000211869	TRUE	FALSE	TRUE	FALSE	BosSINE2	-	3
ctg4-7215946-7216020	78.5856	85.1573	70.4974	14.6599	0.00103778	0.0285926	ABCA13	59.4827	2.44942	0.00127077	TRUE	FALSE	TRUE	FALSE	BosSINE1	+	3
ctg4-7286585-7286832	67.6534	72.946	61.5792	11.3668	0.000229514	0.0167908	ABCA13	59.4827	2.44942	0.00127077	TRUE	FALSE	TRUE	FALSE	BosSINEL	-	4
ctg4-7346298-7346410	88.4218	95.0867	80.4218	14.6649	9.26776e-05	0.0132745	ABCA13	59.4827	2.44942	0.00127077	TRUE	FALSE	TRUE	FALSE	BosSINE6	+	3
ctg4-7349061-7349271	91.4157	96.0906	85.4068	10.6837	0.000580014	0.0224556	ABCA13	59.4827	2.44942	0.00127077	TRUE	FALSE	TRUE	FALSE	BosSINE2	+	6
ctg4-7469745-7469970	87.1862	92.2948	80.8987	11.3961	0.000523074	0.0224556	ABCA13	59.4827	2.44942	0.00127077	TRUE	FALSE	TRUE	FALSE	BosSINE2	+	3
ctg4-7564399-7564617	57.6321	66.0777	46.8267	19.251	0.00212864	0.0396247	ABCA13	59.4827	2.44942	0.00127077	TRUE	FALSE	TRUE	FALSE	BosSINE2	+	4
ctg4-77142697-77142919	88.2331	94.7736	80.0793	14.6943	5.74679e-06	0.00881238	GCK	340.599	-4.96069	1.69e-06	TRUE	FALSE	TRUE	FALSE	BosSINE2	+	9
ctg4-78879245-78879368	78.6472	87.5021	67.9644	19.5377	0.00149782	0.0334817	GLI3	53.9962	-4.18357	5.88e-06	TRUE	FALSE	TRUE	FALSE	BosSINE6	+	4
ctg4-80325269-80325495	49.96	40.9769	60.9573	-19.9804	0.00149782	0.0334817	SUGCT	54.7381	-2.59252	0.0024101	TRUE	FALSE	TRUE	FALSE	BosSINEL	-	10
ctg4-80757881-80758097	87.0125	91.6041	81.4735	10.1306	0.000473624	0.0209513	SUGCT	54.7381	-2.59252	0.0024101	TRUE	FALSE	TRUE	FALSE	BosSINE2	+	3
ctg4-8664343-8664548	87.1806	93.4825	79.7038	13.7787	0.00108524	0.0293547	FZD1	28.0209	-1.70255	0.0181463	TRUE	FALSE	FALSE	TRUE	BosSINEL	-	3
ctg4-86844240-86844451	87.9766	92.7847	81.9917	10.793	0.000540337	0.0224556	CADPS2	82.0477	-2.93795	0.000148946	TRUE	FALSE	TRUE	FALSE	BosSINE3	-	3
ctg4-86985054-86985326	82.8587	91.863	71.4878	20.3752	0.000707298	0.0243453	CADPS2	82.0477	-2.93795	0.000148946	TRUE	FALSE	TRUE	FALSE	BosSINEL	-	6
ctg4-87015032-87015172	82.8345	88.224	76.2013	12.0227	0.00252352	0.0430208	CADPS2	82.0477	-2.93795	0.000148946	TRUE	FALSE	TRUE	FALSE	BosSINE2	+	3
ctg4-87269592-87269779	54.2484	62.8809	43.576	19.3048	0.000580014	0.0224556	CADPS2	82.0477	-2.93795	0.000148946	TRUE	FALSE	TRUE	FALSE	BosSINE3	+	4
ctg4-94733551-94733627	80.0057	93.6146	63.2564	30.3582	0.000707298	0.0243453	LOC107131356	713.928	1.34123	0.0051648	TRUE	FALSE	TRUE	FALSE	BosSINE3	-	6
ctg4-94733769-94733961	86.2183	95.185	75.1823	20.0027	0.00038477	0.0194558	LOC107131356	713.928	1.34123	0.0051648	TRUE	FALSE	TRUE	FALSE	BosSINE3	-	5
ctg4-94808899-94809108	90.6851	95.081	84.9921	10.0889	0.00124915	0.0309714	LOC107131356	713.928	1.34123	0.0051648	TRUE	TRUE	FALSE	FALSE	BosSINE2	-	6
ctg4-96058545-96058754	83.2975	89.0113	76.7046	12.3067	0.00183285	0.0371616	PLXNA4	10.815	-3.11238	0.000520629	TRUE	FALSE	TRUE	FALSE	BosSINE3	+	5
ctg4-97815516-97815720	74.6807	83.4198	63.5821	19.8377	0.000858483	0.026256	LRGUK	1.8939	-3.48175	0.0378019	TRUE	FALSE	TRUE	FALSE	BosSINE3	+	3
ctg4-97822865-97823129	88.9883	93.5141	83.43	10.084	0.000126017	0.013894	LRGUK	1.8939	-3.48175	0.0378019	TRUE	FALSE	TRUE	FALSE	BosSINEL	+	12
ctg4-98586591-98586762	76.903	85.8048	66.4144	19.3904	0.00124915	0.0309714	CALD1	286.458	-1.6803	8.3e-05	TRUE	FALSE	TRUE	FALSE	BosSINE3	+	4
ctg4-98616201-98616476	85.182	90.5384	78.7671	11.7713	0.00124915	0.0309714	CALD1	286.458	-1.6803	8.3e-05	TRUE	FALSE	TRUE	FALSE	BosSINEL	+	9
ctg4-98638579-98638765	81.243	93.3656	66.8885	26.4772	0.000147557	0.0148443	CALD1	286.458	-1.6803	8.3e-05	TRUE	FALSE	TRUE	FALSE	BosSINE2	+	3
ctg4-98970738-98970961	73.149	80.2148	64.3522	15.8626	0.000311152	0.0180281	LOC514257	54.5536	1.4883	0.0260126	TRUE	FALSE	FALSE	TRUE	BosSINE2	+	4
ctg5-100071219-100071414	78.7759	91.9917	62.0392	29.9525	5.99431e-05	0.011619	CLEC2B	260.504	1.20098	0.00297341	TRUE	FALSE	TRUE	FALSE	BosSINE2	+	3
ctg5-100093520-100093576	15.184	4.60778	27.9577	-23.3499	0.00247324	0.0430208	LOC617565	645.598	1.64469	0.000824157	TRUE	TRUE	FALSE	FALSE	BosSINE1	+	3
ctg5-100094897-100095160	12.4493	2.93382	23.7897	-20.8559	4.19403e-05	0.0113782	LOC617565	645.598	1.64469	0.000824157	TRUE	TRUE	FALSE	FALSE	BosSINEL	+	3
ctg5-100097531-100097726	22.0069	13.4906	32.4885	-18.9978	0.00103778	0.0285926	LOC617565	645.598	1.64469	0.000824157	TRUE	FALSE	TRUE	FALSE	BosSINE1	+	3
ctg5-100100342-100100612	15.1825	2.74846	29.809	-27.0605	2.00696e-05	0.0097305	LOC617565	645.598	1.64469	0.000824157	TRUE	TRUE	FALSE	FALSE	BosSINEL	-	9
ctg5-100884296-100884567	86.0451	94.8294	76.347	18.4823	9.90217e-05	0.0132745	A2M	2022.02	1.69607	0.00312559	TRUE	FALSE	TRUE	FALSE	BosSINEL	-	6
ctg5-101134457-101134670	87.8842	92.4753	82.2059	10.2694	0.00100266	0.0285926	RIMKLB	68.2831	-2.23759	0.000263612	TRUE	FALSE	TRUE	FALSE	BosSINE3	+	3
ctg5-101484505-101484631	91.3764	96.6948	84.6792	12.0156	0.00144838	0.0334817	SLC2A3	49244.7	2.28996	0.00013002	TRUE	FALSE	TRUE	FALSE	BosSINE6	+	3
ctg5-101510146-101510370	60.5949	45.559	79.7306	-34.1715	7.73607e-05	0.0124599	SLC2A3	49244.7	2.28996	0.00013002	TRUE	FALSE	TRUE	FALSE	BosSINE2	+	4
ctg5-101708488-101708606	43.3901	35.2431	54.2613	-19.0182	2.67594e-05	0.0103792	CLEC4E	144.261	1.3232	0.0146856	TRUE	FALSE	TRUE	FALSE	BosSINEL	+	5
ctg5-103287932-103288059	83.5604	91.5898	73.8827	17.7072	0.00307205	0.0476466	C1RL	218.453	1.54798	0.0117417	TRUE	TRUE	TRUE	FALSE	BosSINE6	-	4
ctg5-10362796-10363044	86.3722	95.1865	75.2646	19.9219	0.000197928	0.0158399	LIN7A	139.357	-6.07923	1.69e-06	TRUE	FALSE	TRUE	FALSE	BosSINE2	-	4
ctg5-106783899-106784119	81.2047	93.4828	66.0933	27.3895	0.000349194	0.0194558	TEAD4	39.7245	-2.94033	7.87e-06	TRUE	FALSE	TRUE	FALSE	BosSINE2	-	4
ctg5-106949113-106949205	91.6328	96.1863	86.0549	10.1313	0.00282611	0.0468558	FKBP4	536.881	-1.06917	0.000858322	TRUE	FALSE	TRUE	FALSE	BosSINE6	-	5
ctg5-107376181-107376377	84.6286	89.5113	78.6192	10.892	5.9973e-05	0.011619	B4GALNT3	116.393	-3.5124	6.22e-05	TRUE	FALSE	TRUE	FALSE	BosSINE4	-	5
ctg5-107385337-107385464	84.9718	94.5542	73.1782	21.376	0.00214001	0.0396247	B4GALNT3	116.393	-3.5124	6.22e-05	TRUE	FALSE	TRUE	FALSE	BosSINE6	-	3
ctg5-107401915-107402142	80.1613	88.0412	70.6115	17.4297	0.000473624	0.0209513	B4GALNT3	116.393	-3.5124	6.22e-05	TRUE	FALSE	TRUE	FALSE	BosSINE2	-	5
ctg5-107418665-107418804	75.396	80.551	69.3808	11.1702	0.00252352	0.0430208	B4GALNT3	116.393	-3.5124	6.22e-05	TRUE	FALSE	TRUE	FALSE	BosSINE2	-	5
ctg5-108407463-108407652	67.4503	76.4436	56.1415	20.3021	0.00015926	0.0148443	CACNA1C	21.3785	-2.43731	0.000482978	TRUE	FALSE	TRUE	FALSE	BosSINE4	+	5
ctg5-108464352-108464503	35.9313	21.4149	54.0741	-32.6592	0.000226803	0.0167908	CACNA1C	21.3785	-2.43731	0.000482978	TRUE	FALSE	TRUE	FALSE	BosSINEL	+	4
ctg5-108478934-108479166	88.1627	93.3186	81.9346	11.384	0.00212864	0.0396247	CACNA1C	21.3785	-2.43731	0.000482978	TRUE	FALSE	TRUE	FALSE	BosSINE2	+	11
ctg5-109422758-109422928	70.0968	81.6276	56.3788	25.2487	0.00103778	0.0285926	CDC42EP1	282.501	-2.69413	1.15e-05	TRUE	FALSE	FALSE	TRUE	BosSINE2	+	4
ctg5-109786959-109787183	84.7071	91.5782	76.4899	15.0882	0.000250236	0.0167908	LOC101905166	43.1273	-4.29278	0.000208919	TRUE	FALSE	TRUE	FALSE	BosSINEL	-	8
ctg5-110777333-110777525	87.982	95.1533	79.4872	15.6661	0.00092863	0.0278673	SYNGR1	52.6673	-1.7598	0.001062	TRUE	FALSE	FALSE	TRUE	BosSINE3	-	3
ctg5-110791843-110792112	81.3365	89.361	71.4696	17.8914	0.000858483	0.026256	SYNGR1	52.6673	-1.7598	0.001062	TRUE	FALSE	TRUE	FALSE	BosSINEL	+	7
ctg5-110873857-110874069	76.3367	70.5297	82.9949	-12.4651	0.00178879	0.0363949	MGAT3	12.3293	-1.63618	0.0176065	TRUE	FALSE	TRUE	FALSE	BosSINE2	-	3
ctg5-110897941-110898127	86.8975	92.1055	80.8401	11.2654	0.000858483	0.026256	MGAT3	12.3293	-1.63618	0.0176065	TRUE	TRUE	FALSE	FALSE	BosSINE1	-	4
ctg5-111359628-111359895	81.4745	93.3437	68.1296	25.2141	2.67594e-05	0.0103792	FAM83F	125.726	-2.07806	0.000439364	TRUE	FALSE	TRUE	FALSE	BosSINEL	-	13
ctg5-112442522-112442714	81.5111	92.0363	68.759	23.2773	0.00229391	0.0418835	ZC3H7B	252.412	-1.11956	0.0117003	TRUE	FALSE	TRUE	FALSE	BosSINE3	+	6
ctg5-113518355-113518492	80.0317	92.4323	64.3256	28.1067	0.000200254	0.0158399	LOC104972597	1.21043	-6.64064	0.0355049	TRUE	FALSE	TRUE	FALSE	BosSINE5	-	3
ctg5-113523652-113523860	89.4929	94.032	83.9583	10.0736	0.00252352	0.0430208	LOC104972597	1.21043	-6.64064	0.0355049	TRUE	TRUE	FALSE	FALSE	BosSINE3	+	4
ctg5-113526387-113526596	64.1201	69.2083	57.8577	11.3506	0.00149782	0.0334817	LOC104972597	1.21043	-6.64064	0.0355049	TRUE	FALSE	TRUE	FALSE	BosSINE2	+	6
ctg5-114775553-114775772	84.3172	90.9783	76.2933	14.685	0.00103778	0.0285926	PARVB	172.146	-1.34647	0.000689964	TRUE	FALSE	TRUE	FALSE	BosSINE2	+	10
ctg5-116242105-116242420	75.0529	70.4467	80.6394	-10.1927	0.00252352	0.0430208	WNT7B	15.0962	-2.54227	0.00124631	TRUE	FALSE	TRUE	FALSE	BosSINE1	-	4
ctg5-1251857-1252124	67.423	59.8267	76.5615	-16.7348	0.00178879	0.0363949	ZFC3H1	2960.09	1.21123	0.00377482	TRUE	FALSE	TRUE	FALSE	BosSINEL	-	10
ctg5-12586373-12586497	75.123	80.076	69.0269	11.0491	0.00212864	0.0396247	TMTC2	72.0122	-1.06536	0.00110885	TRUE	FALSE	TRUE	FALSE	BosSINE6	-	3
ctg5-1285290-1285539	58.4993	68.1025	46.68	21.4225	4.62101e-05	0.0113782	ZFC3H1	2960.09	1.21123	0.00377482	TRUE	FALSE	TRUE	FALSE	BosSINEL	-	5
ctg5-24347221-24347495	59.0228	53.9189	65.2603	-11.3414	0.00015926	0.0148443	TMCC3	228.693	-1.37819	0.000998503	TRUE	FALSE	TRUE	FALSE	BosSINEL	-	9
ctg5-24418380-24418499	73.2017	86.5482	57.5892	28.959	0.00149782	0.0334817	TMCC3	228.693	-1.37819	0.000998503	TRUE	FALSE	TRUE	FALSE	BosSINE6	-	5
ctg5-24481926-24482118	86.5306	91.082	80.9572	10.1248	0.00103778	0.0285926	TMCC3	228.693	-1.37819	0.000998503	TRUE	FALSE	TRUE	FALSE	BosSINE1	-	5
ctg5-25479629-25479902	86.393	94.2491	76.7798	17.4693	2.00696e-05	0.0097305	GLYCAM1	52612.3	-6.76119	5.23e-09	TRUE	FALSE	TRUE	FALSE	BosSINEL	+	11
ctg5-25709127-25709324	20.3619	4.52852	39.849	-35.3205	0.000135813	0.0148443	GPR84	2054.72	2.66166	6.35e-05	TRUE	FALSE	FALSE	TRUE	BosSINEL	-	8
ctg5-25709264-25709355	19.3836	2.82422	39.7644	-36.9402	0.000159654	0.0148638	GPR84	2054.72	2.66166	6.35e-05	TRUE	FALSE	FALSE	TRUE	BosSINE1	-	4
ctg5-27678261-27678456	62.5314	76.8573	46.3513	30.506	0.00038477	0.0194558	KRT7	551.007	-2.53474	0.000235691	TRUE	FALSE	TRUE	FALSE	BosSINE3	-	3
ctg5-27684406-27684705	80.0703	88.1707	70.4175	17.7532	0.00178879	0.0363949	KRT7	551.007	-2.53474	0.000235691	TRUE	FALSE	TRUE	FALSE	BosSINE1	+	6
ctg5-27687201-27687479	71.8498	86.025	53.6548	32.3702	0.00015926	0.0148443	KRT7	551.007	-2.53474	0.000235691	TRUE	FALSE	TRUE	FALSE	BosSINEL	-	4
ctg5-29795501-29795754	89.5327	95.0188	83.0715	11.9473	0.000858483	0.026256	GPD1	237.892	-3.07706	0.000339814	TRUE	FALSE	FALSE	TRUE	BosSINEL	-	10
ctg5-33453535-33453732	66.0295	74.7958	55.3423	19.4535	0.000200254	0.0158399	SLC38A4	6.74168	-4.21081	0.00319187	TRUE	FALSE	TRUE	FALSE	BosSINE2	-	3
ctg5-35835926-35836156	74.3872	85.7194	60.1967	25.5228	0.000473624	0.0209513	NELL2	290.202	-1.85894	0.0268138	TRUE	FALSE	TRUE	FALSE	BosSINEL	-	9
ctg5-47329698-47329910	79.7885	85.1385	73.2038	11.9347	0.00252352	0.0430208	GRIP1	31.3088	-4.42486	3.47e-05	TRUE	FALSE	TRUE	FALSE	BosSINE2	+	3
ctg5-4993136-4993402	80.3503	84.9828	74.6155	10.3673	0.00212864	0.0396247	GLIPR1	1124.79	1.67952	0.000593594	TRUE	FALSE	TRUE	FALSE	BosSINEL	-	8
ctg5-50738624-50738858	83.9682	89.7665	76.8949	12.8716	0.00126597	0.0309714	PPM1H	1285.93	1.01612	0.00055595	TRUE	FALSE	TRUE	FALSE	BosSINEL	-	5
ctg5-51255503-51255714	85.0817	95.0288	73.0962	21.9326	0.00134963	0.0329373	USP15	2328.37	1.47122	0.000427572	TRUE	FALSE	TRUE	FALSE	BosSINE3	+	3
ctg5-56551699-56551930	85.8862	93.9242	75.9933	17.9309	0.00298141	0.0468558	SDR9C7	2.52066	-2.94489	0.0220686	TRUE	FALSE	TRUE	FALSE	BosSINE2	-	4
ctg5-57550833-57551057	88.7724	93.8531	82.4224	11.4307	0.00178879	0.0363949	ITGA7	29.1109	-2.38955	0.00122213	TRUE	FALSE	TRUE	FALSE	BosSINE2	-	8
ctg5-65492532-65492659	86.8183	93.8834	77.7874	16.096	0.000488171	0.0212516	MYBPC1	93.541	-7.57391	2.77e-06	TRUE	FALSE	TRUE	FALSE	BosSINE2	+	3
ctg5-65734669-65734950	85.7628	90.7107	79.6505	11.0602	0.000858483	0.026256	DRAM1	745.248	1.34828	0.00649907	TRUE	FALSE	TRUE	FALSE	BosSINEL	-	8
ctg5-66649432-66649643	86.0205	91.0633	79.8274	11.2359	0.0024763	0.0430208	PAH	1653.84	-7.63084	1.07e-09	TRUE	FALSE	TRUE	FALSE	BosSINE2	-	4
ctg5-66678432-66678592	87.5437	92.6509	81.4947	11.1562	0.00124915	0.0309714	PAH	1653.84	-7.63084	1.07e-09	TRUE	FALSE	TRUE	FALSE	BosSINE4	-	4
ctg5-68005205-68005429	76.9567	72.0875	83.6717	-11.5842	0.000858483	0.026256	CHST11	2233.38	1.59802	0.000240296	TRUE	FALSE	TRUE	FALSE	BosSINE2	+	3
ctg5-68056243-68056437	64.6367	58.193	72.5808	-14.3878	0.000473624	0.0209513	CHST11	2233.38	1.59802	0.000240296	TRUE	FALSE	TRUE	FALSE	BosSINE2	+	4
ctg5-68583683-68583956	84.9516	90.5216	77.6055	12.9162	0.000580014	0.0224556	ALDH1L2	43.0938	-1.75406	0.00635078	TRUE	FALSE	TRUE	FALSE	BosSINEL	+	5
ctg5-70354161-70354360	86.081	91.1314	80.285	10.8464	0.000178462	0.0158399	CRY1	261.728	-1.07001	0.00187429	TRUE	FALSE	TRUE	FALSE	BosSINE1	-	6
ctg5-72155045-72155319	65.1895	58.8322	73.2184	-14.3862	0.00149782	0.0334817	LARGE1	182.545	-1.73137	2.15e-05	TRUE	FALSE	TRUE	FALSE	BosSINEL	+	12
ctg5-72245917-72246133	86.9248	91.9778	80.6947	11.2831	0.00124915	0.0309714	LARGE1	182.545	-1.73137	2.15e-05	TRUE	FALSE	TRUE	FALSE	BosSINE2	-	4
ctg5-72323179-72323253	87.5974	92.9492	81.0106	11.9386	0.000200254	0.0158399	LARGE1	182.545	-1.73137	2.15e-05	TRUE	FALSE	TRUE	FALSE	BosSINE3	+	4
ctg5-73998752-73998829	87.8321	95.2668	78.9777	16.2891	7.42742e-05	0.0124599	RBFOX2	135.251	-1.46594	0.000415694	TRUE	FALSE	TRUE	FALSE	BosSINE3	-	4
ctg5-74067311-74067581	82.3506	90.7353	72.087	18.6483	0.000250236	0.0167908	RBFOX2	135.251	-1.46594	0.000415694	TRUE	FALSE	TRUE	FALSE	BosSINEL	-	10
ctg5-74163588-74163814	86.076	91.876	79.1038	12.7722	0.00108524	0.0293547	RBFOX2	135.251	-1.46594	0.000415694	TRUE	TRUE	FALSE	FALSE	BosSINE1	-	3
ctg5-77554697-77554870	87.3373	92.7578	80.6355	12.1224	0.000488955	0.0212516	BICD1	60.6035	-3.3752	3.11e-06	TRUE	FALSE	TRUE	FALSE	BosSINE3	+	3
ctg5-77586600-77586806	81.8049	91.9643	70.5641	21.4002	0.000858483	0.026256	BICD1	60.6035	-3.3752	3.11e-06	TRUE	FALSE	TRUE	FALSE	BosSINE2	-	3
ctg5-82071656-82071928	82.4191	88.1721	75.4583	12.7138	0.000250236	0.0167908	MANSC4	85.2978	-6.87343	1.09e-05	TRUE	FALSE	TRUE	FALSE	BosSINEL	-	5
ctg5-82212926-82213003	87.944	92.9945	81.7279	11.2666	0.00103778	0.0285926	PPFIBP1	175.129	-2.70434	2.38e-06	TRUE	FALSE	TRUE	FALSE	BosSINE3	-	4
ctg5-91524451-91524570	83.9517	79.0646	89.9667	-10.9021	0.000311152	0.0180281	PIK3C2G	39.9397	-5.76885	4.66e-05	TRUE	FALSE	TRUE	FALSE	BosSINEL	+	3
ctg5-91651525-91651737	78.9753	83.5948	73.2897	10.305	0.00298141	0.0468558	PIK3C2G	39.9397	-5.76885	4.66e-05	TRUE	FALSE	TRUE	FALSE	BosSINE2	-	3
ctg5-94128256-94128468	83.7543	90.7883	75.0971	15.6912	0.000200254	0.0158399	EPS8	418.025	-1.7335	0.00679815	TRUE	FALSE	TRUE	FALSE	BosSINE3	-	4
ctg5-94173798-94174005	18.0011	13.3306	24.0581	-10.7274	0.00214001	0.0396247	EPS8	418.025	-1.7335	0.00679815	TRUE	FALSE	TRUE	FALSE	BosSINE3	+	3
ctg5-96816578-96816790	86.1884	92.6445	78.137	14.5075	0.000580014	0.0224556	FAM234B	430.114	-1.90666	0.000222563	TRUE	FALSE	TRUE	FALSE	BosSINE2	+	6
ctg5-96819468-96819648	82.3101	91.3853	71.3596	20.0256	0.000858483	0.026256	FAM234B	430.114	-1.90666	0.000222563	TRUE	FALSE	TRUE	FALSE	BosSINE3	+	4
ctg5-99971100-99971293	92.2151	97.6222	85.2793	12.3429	0.000257625	0.0172468	LOC785168	199.32	2.35096	0.00524338	TRUE	FALSE	TRUE	FALSE	BosSINE3	-	3
ctg6-101549828-101550037	83.6859	90.4908	76.0081	14.4827	0.000286255	0.0180281	PTPN13	81.7011	-2.24379	0.00139138	TRUE	FALSE	TRUE	FALSE	BosSINE2	+	3
ctg6-101600108-101600316	83.7517	88.2697	78.2338	10.0359	0.00230253	0.0418835	PTPN13	81.7011	-2.24379	0.00139138	TRUE	FALSE	TRUE	FALSE	BosSINE2	-	3
ctg6-101611576-101611762	85.3646	91.026	78.9313	12.0948	0.000858483	0.026256	PTPN13	81.7011	-2.24379	0.00139138	TRUE	FALSE	TRUE	FALSE	BosSINEL	+	8
ctg6-103219972-103220100	72.5577	85.6463	57.1122	28.5341	1.49417e-05	0.0093863	C6H4orf50	7.16735	-1.73326	0.0296166	TRUE	FALSE	TRUE	FALSE	BosSINEL	+	4
ctg6-103221480-103221693	81.9481	87.7216	74.8062	12.9154	0.000624034	0.0239174	C6H4orf50	7.16735	-1.73326	0.0296166	TRUE	FALSE	TRUE	FALSE	BosSINE3	+	6
ctg6-103221855-103222066	64.3863	77.3479	49.1492	28.1987	0.00149782	0.0334817	C6H4orf50	7.16735	-1.73326	0.0296166	TRUE	FALSE	TRUE	FALSE	BosSINE2	-	5
ctg6-105111425-105111613	77.5518	87.6772	65.591	22.0862	0.00198806	0.0394187	SLC2A9	1009.52	1.97381	0.000550541	TRUE	FALSE	TRUE	FALSE	BosSINE2	-	3
ctg6-105111438-105111645	77.5518	87.6772	65.591	22.0862	0.00198806	0.0394187	SLC2A9	1009.52	1.97381	0.000550541	TRUE	FALSE	TRUE	FALSE	BosSINE3	-	3
ctg6-105221778-105222004	61.8134	57.1523	67.55	-10.3977	0.00149782	0.0334817	SLC2A9	1009.52	1.97381	0.000550541	TRUE	FALSE	TRUE	FALSE	BosSINE2	+	4
ctg6-110811345-110811533	60.1952	51.8352	71.0909	-19.2558	0.00178879	0.0363949	FBXL5	6932.94	1.4141	0.00240905	TRUE	FALSE	TRUE	FALSE	BosSINE3	-	4
ctg6-111399706-111399915	84.8268	93.7591	73.9994	19.7598	0.00124915	0.0309714	TAPT1	603.649	1.18253	0.000553745	TRUE	FALSE	TRUE	FALSE	BosSINE3	-	6
ctg6-111411423-111411634	87.1898	95.937	76.088	19.8489	0.00306841	0.0476466	TAPT1	603.649	1.18253	0.000553745	TRUE	FALSE	TRUE	FALSE	BosSINE3	-	6
ctg6-111418510-111418592	91.148	98.0848	82.6908	15.3941	9.09582e-05	0.0132745	TAPT1	603.649	1.18253	0.000553745	TRUE	FALSE	TRUE	FALSE	BosSINE2	+	5
ctg6-113400118-113400230	89.3276	94.7198	82.691	12.0288	0.00103778	0.0285926	TBC1D14	1406.85	1.09143	0.00124656	TRUE	FALSE	TRUE	FALSE	BosSINE6	-	3
ctg6-113425842-113426069	88.8052	95.4219	80.6615	14.7603	0.0024763	0.0430208	TBC1D14	1406.85	1.09143	0.00124656	TRUE	FALSE	TRUE	FALSE	BosSINE3	-	4
ctg6-113434621-113434795	87.1212	93.9052	78.5877	15.3175	0.000580014	0.0224556	TBC1D14	1406.85	1.09143	0.00124656	TRUE	FALSE	TRUE	FALSE	BosSINE3	-	3
ctg6-113446570-113446649	18.628	8.28639	31.0474	-22.761	0.000858483	0.026256	TBC1D14	1406.85	1.09143	0.00124656	TRUE	FALSE	TRUE	FALSE	BosSINE3	-	3
ctg6-115532289-115532405	79.1851	91.5969	63.909	27.6879	0.00149782	0.0334817	RGS12	145.182	-2.45501	0.000138511	TRUE	FALSE	TRUE	FALSE	BosSINE6	+	3
ctg6-117652875-117653097	89.724	96.984	80.9571	16.0269	0.000210536	0.0163489	MYL5	5.44294	-1.59991	0.0280783	TRUE	FALSE	FALSE	TRUE	BosSINE2	-	6
ctg6-12307830-12308035	78.3759	92.9645	60.6519	32.3126	0.000793191	0.026256	ANK2	40.5498	-1.19511	0.0422047	TRUE	FALSE	TRUE	FALSE	BosSINE2	+	4
ctg6-12474747-12475014	85.8306	91.3179	79.2367	12.0813	0.00015926	0.0148443	ANK2	40.5498	-1.19511	0.0422047	TRUE	FALSE	TRUE	FALSE	BosSINEL	+	6
ctg6-12608964-12609148	81.2085	85.9038	75.3921	10.5117	0.00252352	0.0430208	ANK2	40.5498	-1.19511	0.0422047	TRUE	FALSE	TRUE	FALSE	BosSINE4	+	3
ctg6-13174344-13174546	79.4124	93.8907	62.4723	31.4184	0.000350963	0.0194558	ALPK1	528.14	2.16576	4.67e-05	TRUE	FALSE	TRUE	FALSE	BosSINE3	+	5
ctg6-16118412-16118604	72.7902	79.826	64.5043	15.3217	0.00149782	0.0334817	COL25A1	5.86473	-3.69975	0.000650981	TRUE	FALSE	TRUE	FALSE	BosSINE3	+	4
ctg6-16118933-16119207	58.2161	51.8544	65.956	-14.1016	0.000473624	0.0209513	COL25A1	5.86473	-3.69975	0.000650981	TRUE	FALSE	TRUE	FALSE	BosSINEL	+	9
ctg6-19246968-19247242	89.1251	95.685	81.0238	14.6612	0.00124915	0.0309714	NPNT	6.92886	-2.23763	0.0267577	TRUE	FALSE	TRUE	FALSE	BosSINEL	+	5
ctg6-19599548-19599764	84.4081	91.524	75.7015	15.8225	7.73607e-05	0.0124599	ARHGEF38	27.4842	-3.23879	0.00149815	TRUE	FALSE	TRUE	FALSE	BosSINE2	-	3
ctg6-24807144-24807355	92.3208	97.4912	85.7256	11.7657	5.74679e-06	0.00881238	DAPP1	267.922	1.33237	2.08e-05	TRUE	FALSE	TRUE	FALSE	BosSINE2	-	5
ctg6-24856467-24856672	49.1	38.5281	62.1115	-23.5834	0.00298141	0.0468558	DAPP1	267.922	1.33237	2.08e-05	TRUE	FALSE	TRUE	FALSE	BosSINE2	+	3
ctg6-30137548-30137821	87.3636	94.294	78.7537	15.5403	3.52765e-05	0.0107934	PDLIM5	580.033	-1.56684	7.24e-05	TRUE	FALSE	TRUE	FALSE	BosSINEL	-	9
ctg6-36292294-36292421	90.8806	98.3059	81.2592	17.0467	0.000202333	0.0159877	HERC5	698.748	1.86321	0.00133845	TRUE	FALSE	TRUE	FALSE	BosSINE6	+	3
ctg6-37278077-37278289	77.0846	86.3551	66.3519	20.0032	0.000250236	0.0167908	FAM184B	24.6362	-3.86181	0.000238982	TRUE	FALSE	TRUE	FALSE	BosSINE3	-	4
ctg6-39807679-39807874	80.5528	86.2879	72.8869	13.401	0.000414629	0.0205211	SLIT2	34.952	-3.10794	0.000627581	TRUE	FALSE	TRUE	FALSE	BosSINE1	+	3
ctg6-43576767-43576891	82.4632	87.1448	76.7013	10.4435	0.00252352	0.0430208	PPARGC1A	86.4325	-5.39822	3.91e-06	TRUE	FALSE	TRUE	FALSE	BosSINE2	-	3
ctg6-45185210-45185407	80.8004	86.0289	74.3654	11.6635	0.000858483	0.026256	SLC34A2	1622.4	-7.55251	2.13e-08	TRUE	FALSE	TRUE	FALSE	BosSINE2	+	4
ctg6-45187498-45187700	81.7746	87.8477	74.3	13.5477	0.000858483	0.026256	SLC34A2	1622.4	-7.55251	2.13e-08	TRUE	FALSE	TRUE	FALSE	BosSINE2	+	4
ctg6-4584242-4584445	86.019	90.7969	80.1385	10.6584	4.62101e-05	0.0113782	PRDM5	8.61267	-2.50763	0.00116495	TRUE	FALSE	TRUE	FALSE	BosSINE3	+	5
ctg6-58221777-58222037	18.6387	6.63807	33.4087	-26.7707	2.00696e-05	0.0097305	TMEM156	2278.89	1.97879	7.05e-05	TRUE	FALSE	TRUE	FALSE	BosSINEL	+	11
ctg6-60010054-60010223	80.8979	86.7984	73.4255	13.3729	0.000580014	0.0224556	APBB2	103.003	-1.88851	8.75e-05	TRUE	FALSE	TRUE	FALSE	BosSINE3	+	4
ctg6-60023640-60023913	73.939	85.9989	60.5758	25.4231	0.00015926	0.0148443	APBB2	103.003	-1.88851	8.75e-05	TRUE	FALSE	TRUE	FALSE	BosSINEL	+	7
ctg6-66718948-66719166	88.3148	94.1906	81.0831	13.1075	2.67594e-05	0.0103792	NIPAL1	38.7117	-1.12861	0.0489803	TRUE	FALSE	TRUE	FALSE	BosSINE2	+	5
ctg6-66823864-66824072	48.3239	54.024	41.3083	12.7156	0.000707298	0.0243453	TEC	325.409	1.58204	0.00150447	TRUE	FALSE	TRUE	FALSE	BosSINE3	-	6
ctg6-66840413-66840487	18.3476	5.44896	34.6118	-29.1628	0.00214765	0.0397468	TEC	325.409	1.58204	0.00150447	TRUE	FALSE	TRUE	FALSE	BosSINE1	-	3
ctg6-66901749-66902023	89.9103	95.9908	83.2855	12.7053	0.000924575	0.0278673	TEC	325.409	1.58204	0.00150447	TRUE	FALSE	TRUE	FALSE	BosSINEL	-	10
ctg6-69550519-69550699	19.3155	5.83529	35.7946	-29.9593	0.000858483	0.026256	CHIC2	667.743	1.42947	0.000986638	TRUE	FALSE	TRUE	FALSE	BosSINEL	+	5
ctg6-70169761-70169918	20.9046	9.33958	35.1385	-25.7989	0.000858483	0.026256	KIT	1143.49	-3.7118	4.83e-05	TRUE	FALSE	TRUE	FALSE	BosSINE2	+	3
ctg6-76858071-76858345	78.9612	87.1424	67.966	19.1764	7.73607e-05	0.0124599	ADGRL3	14.5902	-2.83909	0.000343553	TRUE	FALSE	TRUE	FALSE	BosSINEL	-	6
ctg6-78166335-78166607	67.389	71.7561	61.6827	10.0734	0.000311152	0.0180281	LOC112447161	1.2299	-20.2378	4.55e-06	TRUE	FALSE	FALSE	TRUE	BosSINEL	-	6
ctg6-85410147-85410370	79.4475	87.0927	70.1327	16.96	0.00286031	0.0468558	CSN1S1	304366	-6.55164	1.45e-08	TRUE	FALSE	FALSE	TRUE	BosSINE2	-	4
ctg6-85413639-85413905	74.08	80.9515	65.5069	15.4445	0.000126017	0.013894	CSN1S1	304366	-6.55164	1.45e-08	TRUE	FALSE	TRUE	FALSE	BosSINEL	-	5
ctg6-85414165-85414433	82.9796	91.8115	71.8784	19.9331	7.73607e-05	0.0124599	CSN1S1	304366	-6.55164	1.45e-08	TRUE	FALSE	TRUE	FALSE	BosSINEL	-	7
ctg6-85453505-85453779	68.7635	75.3819	60.6894	14.6925	0.00178879	0.0363949	CSN2	494708	-6.89847	0.000435558	TRUE	FALSE	TRUE	FALSE	BosSINEL	+	5
ctg6-85454401-85454665	79.843	88.1359	69.7656	18.3703	0.000473624	0.0209513	CSN2	494708	-6.89847	0.000435558	TRUE	FALSE	TRUE	FALSE	BosSINEL	-	10
ctg6-85470712-85470922	81.4599	87.1109	74.3563	12.7546	0.00126597	0.0309714	HSTN	6452.19	-7.33069	1.1e-08	TRUE	FALSE	TRUE	FALSE	BosSINE3	-	6
ctg6-85653875-85654140	76.3241	82.8934	68.0526	14.8408	0.00126597	0.0309714	CSN3	105876	-5.96768	9.55e-07	TRUE	FALSE	TRUE	FALSE	BosSINEL	-	4
ctg6-87460009-87460225	89.106	94.6875	81.8425	12.845	0.00169322	0.0363949	ADAMTS3	27.8253	-3.96885	0.000184748	TRUE	FALSE	TRUE	FALSE	BosSINE2	+	3
ctg6-89868453-89868656	82.3302	94.2921	68.8436	25.4485	0.000223561	0.0167908	PARM1	779.673	1.98961	0.000450876	TRUE	FALSE	TRUE	FALSE	BosSINE3	-	3
ctg6-91220754-91220908	88.6661	93.4677	82.2639	11.2038	0.00319092	0.0492782	STBD1	18.3248	-2.74048	0.000560688	TRUE	FALSE	TRUE	FALSE	BosSINE3	-	3
ctg6-91453159-91453356	76.2391	90.8292	58.2821	32.5471	0.000311152	0.0180281	SHROOM3	242.625	-2.98047	8.19e-06	TRUE	FALSE	TRUE	FALSE	BosSINE3	+	3
ctg6-91505727-91505938	79.4558	87.6639	70.5608	17.1032	0.00092863	0.0278673	SHROOM3	242.625	-2.98047	8.19e-06	TRUE	FALSE	TRUE	FALSE	BosSINE2	+	5
ctg6-91575099-91575371	85.6139	90.9107	79.5661	11.3446	0.000473624	0.0209513	SHROOM3	242.625	-2.98047	8.19e-06	TRUE	FALSE	TRUE	FALSE	BosSINEL	-	7
ctg6-91597748-91597965	87.0732	93.5625	78.3909	15.1716	0.00149782	0.0334817	SHROOM3	242.625	-2.98047	8.19e-06	TRUE	FALSE	TRUE	FALSE	BosSINE3	+	4
ctg6-92868454-92868647	75.9744	87.0219	62.1442	24.8777	0.00252352	0.0430208	FRAS1	3.26105	-3.02141	0.0449652	TRUE	FALSE	TRUE	FALSE	BosSINE1	-	4
ctg6-93195207-93195432	78.1156	84.2419	70.5534	13.6885	0.00266198	0.0446645	FRAS1	3.26105	-3.02141	0.0449652	TRUE	FALSE	TRUE	FALSE	BosSINE2	+	3
ctg6-93196142-93196236	82.2034	93.1083	68.0338	25.0745	0.00146618	0.0334817	FRAS1	3.26105	-3.02141	0.0449652	TRUE	FALSE	TRUE	FALSE	BosSINE1	+	3
ctg6-93258206-93258424	83.9296	91.6052	74.7558	16.8495	0.0024763	0.0430208	FRAS1	3.26105	-3.02141	0.0449652	TRUE	FALSE	TRUE	FALSE	BosSINE2	-	3
ctg6-93434221-93434350	20.7402	3.32221	40.0121	-36.6899	0.00112835	0.0304751	LOC112447104	51.5049	2.82652	0.00244775	TRUE	TRUE	FALSE	FALSE	BosSINE6	-	3
ctg6-93616186-93616448	57.5135	63.6916	50.0997	13.5919	0.00124915	0.0309714	BMP2K	3578.46	1.02321	2.21e-05	TRUE	FALSE	TRUE	FALSE	BosSINEL	+	7
ctg6-94591243-94591489	88.1484	92.8079	82.1612	10.6468	0.00298141	0.0468558	ANTXR2	4213.03	1.78986	4.36e-05	TRUE	FALSE	TRUE	FALSE	BosSINEL	+	7
ctg6-95826798-95827053	71.7173	80.3601	61.594	18.7661	0.00252352	0.0430208	BMP3	6.61561	-8.06274	6.92e-05	TRUE	FALSE	TRUE	FALSE	BosSINEL	+	5
ctg6-97308383-97308575	82.0214	88.523	74.5037	14.0193	0.00263206	0.0446486	TMEM150C	35.7866	-2.0566	0.00826208	TRUE	FALSE	TRUE	FALSE	BosSINE2	-	4
ctg6-97327103-97327351	78.5801	91.5978	63.1671	28.4307	7.73607e-05	0.0124599	TMEM150C	35.7866	-2.0566	0.00826208	TRUE	FALSE	TRUE	FALSE	BosSINEL	+	6
ctg6-97469589-97469706	74.0243	87.7493	56.586	31.1633	0.00252352	0.0430208	SCD5	14.4655	-5.47234	3.07e-05	TRUE	FALSE	TRUE	FALSE	BosSINE6	+	3
ctg6-97495629-97495817	83.3365	91.4327	74.0969	17.3358	4.62101e-05	0.0113782	SCD5	14.4655	-5.47234	3.07e-05	TRUE	FALSE	TRUE	FALSE	BosSINE3	+	5
ctg6-97617955-97618172	80.6077	87.4361	73.5062	13.9299	0.000296533	0.0180281	SCD5	14.4655	-5.47234	3.07e-05	TRUE	FALSE	TRUE	FALSE	BosSINEL	-	5
ctg6-97619257-97619476	86.959	92.4287	80.2269	12.2018	0.00178879	0.0363949	SCD5	14.4655	-5.47234	3.07e-05	TRUE	FALSE	TRUE	FALSE	BosSINE2	-	5
ctg7-106603453-106603653	71.1966	82.6881	58.4551	24.233	0.000473624	0.0209513	EFNA5	38.1253	-2.33128	0.00348367	TRUE	FALSE	TRUE	FALSE	BosSINE3	+	3
ctg7-106643942-106644166	82.2082	91.5841	71.1411	20.443	0.000473624	0.0209513	EFNA5	38.1253	-2.33128	0.00348367	TRUE	FALSE	TRUE	FALSE	BosSINE3	+	7
ctg7-10968923-10969097	35.0399	21.778	49.7795	-28.0016	0.00120795	0.0309714	LOC100299045	50.7704	2.47968	0.00273513	TRUE	FALSE	TRUE	FALSE	BosSINE2	+	3
ctg7-12511395-12511539	89.8073	94.9719	83.451	11.5209	0.000311152	0.0180281	NFIX	464.921	-3.63491	1.45e-05	TRUE	FALSE	TRUE	FALSE	BosSINE3	+	4
ctg7-12512368-12512494	84.7306	90.6898	77.3962	13.2937	0.000927277	0.0278673	NFIX	464.921	-3.63491	1.45e-05	TRUE	FALSE	TRUE	FALSE	BosSINEL	-	4
ctg7-12516020-12516231	87.1954	94.3734	78.679	15.6944	0.00038477	0.0194558	NFIX	464.921	-3.63491	1.45e-05	TRUE	FALSE	TRUE	FALSE	BosSINE2	-	7
ctg7-12534134-12534395	71.0859	82.2877	57.7276	24.5601	0.000126017	0.013894	NFIX	464.921	-3.63491	1.45e-05	TRUE	FALSE	TRUE	FALSE	BosSINEL	-	11
ctg7-12537901-12538115	81.1983	91.6228	68.3681	23.2547	0.000200254	0.0158399	NFIX	464.921	-3.63491	1.45e-05	TRUE	FALSE	TRUE	FALSE	BosSINE2	+	10
ctg7-12606847-12606981	66.5701	73.2433	58.8702	14.3731	3.63761e-05	0.0110761	GADD45GIP1	63.2622	-1.03553	0.0324504	TRUE	FALSE	FALSE	TRUE	BosSINE3	+	4
ctg7-12606867-12606982	60.9149	68.0933	52.6321	15.4613	6.38318e-05	0.0122973	GADD45GIP1	63.2622	-1.03553	0.0324504	TRUE	FALSE	FALSE	TRUE	BosSINE2	+	3
ctg7-12608109-12608296	82.2868	88.7969	74.2744	14.5225	9.90217e-05	0.0132745	GADD45GIP1	63.2622	-1.03553	0.0324504	TRUE	FALSE	TRUE	FALSE	BosSINE1	+	3
ctg7-13202869-13203059	50.3536	60.2698	37.1319	23.1378	0.00021649	0.0167665	MUC16	2266.27	-3.38462	6.65e-05	TRUE	FALSE	TRUE	FALSE	BosSINE3	-	3
ctg7-13253793-13253983	80.8181	87.3788	73.2123	14.1665	0.00103778	0.0285926	MUC16	2266.27	-3.38462	6.65e-05	TRUE	FALSE	TRUE	FALSE	BosSINE2	+	6
ctg7-13300297-13300513	79.3252	84.5269	72.9136	11.6132	0.000793191	0.026256	MUC16	2266.27	-3.38462	6.65e-05	TRUE	FALSE	TRUE	FALSE	BosSINE3	+	4
ctg7-14902351-14902522	86.0155	95.1863	74.7284	20.458	0.000126017	0.013894	TYK2	5749.14	1.58217	0.000157133	TRUE	FALSE	TRUE	FALSE	BosSINE5	+	8
ctg7-15574592-15574730	82.594	95.7228	65.7969	29.926	0.000413947	0.0205211	LDLR	1303.5	-1.38019	0.000130854	TRUE	FALSE	TRUE	FALSE	BosSINE3	+	3
ctg7-15674085-15674309	77.4849	86.3649	66.1799	20.1849	5.9973e-05	0.011619	DOCK6	104.682	-1.59706	7.68e-05	TRUE	FALSE	TRUE	FALSE	BosSINE3	+	6
ctg7-15677055-15677277	66.642	60.0391	74.7686	-14.7295	0.00038477	0.0194558	DOCK6	104.682	-1.59706	7.68e-05	TRUE	FALSE	FALSE	TRUE	BosSINE2	+	6
ctg7-15829815-15830043	83.9307	88.6038	78.1792	10.4245	0.00298141	0.0468558	ELAVL3	10.0924	-3.0953	0.00509522	TRUE	FALSE	TRUE	FALSE	BosSINE2	+	5
ctg7-15830063-15830176	86.0351	93.376	77	16.376	0.000858483	0.026256	ELAVL3	10.0924	-3.0953	0.00509522	TRUE	FALSE	TRUE	FALSE	BosSINE6	-	3
ctg7-16452679-16452901	80.8424	87.2067	73.053	14.1537	4.62101e-05	0.0113782	CAMSAP3	131.078	-3.89696	1.66e-05	TRUE	FALSE	TRUE	FALSE	BosSINE2	+	4
ctg7-16771557-16771756	78.4793	88.999	65.5321	23.4669	9.90217e-05	0.0132745	CCL25	32.6106	-1.36256	0.00224899	TRUE	FALSE	TRUE	FALSE	BosSINE3	-	3
ctg7-16841927-16842137	84.0833	89.4274	77.5139	11.9134	0.000250236	0.0167908	FBN3	2.45152	-2.95312	0.0240825	TRUE	FALSE	TRUE	FALSE	BosSINE3	-	4
ctg7-17561868-17561990	87.1534	93.375	79.4962	13.8788	0.00178879	0.0363949	LOC508459	12204.2	3.15861	6.57e-05	TRUE	FALSE	TRUE	FALSE	BosSINE3	-	3
ctg7-17583625-17583828	90.1149	97.0656	81.5603	15.5054	0.00156854	0.0348971	LOC508459	12204.2	3.15861	6.57e-05	TRUE	FALSE	TRUE	FALSE	BosSINE2	+	3
ctg7-17700679-17700786	21.4057	4.73646	41.9218	-37.1853	5.95673e-05	0.011619	VAV1	1486.94	1.41756	0.00280096	TRUE	FALSE	TRUE	FALSE	BosSINE6	+	3
ctg7-17734076-17734289	85.5477	94.925	74.0064	20.9186	0.000676282	0.0243453	SH2D3A	10.4038	-1.40396	0.0212194	TRUE	FALSE	TRUE	FALSE	BosSINE3	+	3
ctg7-18539089-18539219	79.2984	86.4951	70.5276	15.9676	0.000200254	0.0158399	NRTN	37.2273	-1.48533	0.0205971	TRUE	FALSE	TRUE	FALSE	BosSINEL	+	6
ctg7-19750702-19750995	71.6433	79.807	61.5957	18.2114	0.00252352	0.0430208	STAP2	99.1224	-3.08966	0.000252088	TRUE	FALSE	TRUE	FALSE	BosSINEL	-	8
ctg7-19751845-19752119	84.6022	91.2056	76.9234	14.2821	5.74679e-06	0.00881238	STAP2	99.1224	-3.08966	0.000252088	TRUE	FALSE	TRUE	FALSE	BosSINEL	-	7
ctg7-20594851-20595161	77.6491	84.109	69.7606	14.3484	0.00252352	0.0430208	CELF5	20.6137	1.50997	0.00663725	TRUE	TRUE	TRUE	FALSE	BosSINEL	-	8
ctg7-20659444-20659719	83.7811	89.9338	76.2387	13.695	1.49417e-05	0.0093863	S1PR4	155.362	1.53573	0.00153279	TRUE	TRUE	FALSE	FALSE	BosSINEL	+	8
ctg7-20661340-20661552	30.0171	19.1537	43.945	-24.7913	0.00298141	0.0468558	S1PR4	155.362	1.53573	0.00153279	TRUE	FALSE	FALSE	TRUE	BosSINE2	+	5
ctg7-22053965-22054239	88.0231	95.2103	79.4615	15.7489	0.000858483	0.026256	SLC22A5	81.955	-1.83349	0.000604259	TRUE	FALSE	TRUE	FALSE	BosSINEL	+	9
ctg7-25828213-25828413	47.2424	38.1104	58.4391	-20.3287	0.00298141	0.0468558	SLC12A2	443.306	-1.01502	0.0246889	TRUE	FALSE	TRUE	FALSE	BosSINE3	-	3
ctg7-27284560-27284679	83.7557	94.4979	70.5346	23.9633	0.000229106	0.0167908	ALDH7A1	321.553	-1.02538	0.00608786	TRUE	FALSE	TRUE	FALSE	BosSINE6	+	3
ctg7-33137652-33137864	68.6477	78.5708	56.041	22.5298	0.000200254	0.0158399	PRR16	40.6673	-4.36448	9.69e-05	TRUE	FALSE	TRUE	FALSE	BosSINE3	-	3
ctg7-38997751-38998022	86.9499	94.6618	77.8027	16.859	9.90217e-05	0.0132745	DOK3	82.4005	2.21985	5.04e-05	TRUE	TRUE	FALSE	FALSE	BosSINEL	-	7
ctg7-39008661-39008821	25.9668	10.6188	44.8567	-34.238	0.000200254	0.0158399	DOK3	82.4005	2.21985	5.04e-05	TRUE	FALSE	TRUE	FALSE	BosSINE5	+	4
ctg7-39759440-39759642	89.8345	95.286	83.4981	11.788	0.00214001	0.0396247	CLK4	1165.84	1.11196	0.00617543	TRUE	FALSE	TRUE	FALSE	BosSINE3	+	4
ctg7-43223241-43223445	85.0917	91.4656	77.2468	14.2188	4.62101e-05	0.0113782	HCN2	155.656	-1.46305	0.00210226	TRUE	FALSE	TRUE	FALSE	BosSINE2	-	6
ctg7-43225446-43225637	78.2362	84.8195	70.1337	14.6859	0.00103778	0.0285926	HCN2	155.656	-1.46305	0.00210226	TRUE	FALSE	TRUE	FALSE	BosSINE3	-	4
ctg7-43559929-43560145	89.4952	94.2607	83.6529	10.6078	0.000250236	0.0167908	ABCA7	294.285	1.00081	0.014436	TRUE	FALSE	TRUE	FALSE	BosSINE3	+	8
ctg7-4702419-4702623	85.9678	92.4729	77.9615	14.5114	0.00252352	0.0430208	ELL	1805.92	1.64806	0.000593065	TRUE	FALSE	TRUE	FALSE	BosSINE3	-	3
ctg7-4708274-4708385	78.3029	92.074	61.0968	30.9771	0.000530614	0.0224556	ELL	1805.92	1.64806	0.000593065	TRUE	FALSE	TRUE	FALSE	BosSINE3	-	6
ctg7-51039809-51039983	85.9513	91.5814	79.1221	12.4593	0.000473624	0.0209513	NRG2	2.41248	-2.95847	0.0286434	TRUE	FALSE	TRUE	FALSE	BosSINE3	+	4
ctg7-5264622-5264735	75.1081	85.4539	62.3092	23.1447	0.000707298	0.0243453	SLC5A5	15.3346	-3.40153	0.00794517	TRUE	FALSE	TRUE	FALSE	BosSINE3	+	3
ctg7-5277540-5277652	78.9988	90.1129	66.0128	24.1001	0.00252352	0.0430208	SLC5A5	15.3346	-3.40153	0.00794517	TRUE	TRUE	FALSE	FALSE	BosSINE6	-	3
ctg7-5278162-5278358	90.4	95.1974	84.4955	10.7019	0.000580014	0.0224556	SLC5A5	15.3346	-3.40153	0.00794517	TRUE	TRUE	FALSE	FALSE	BosSINE2	-	6
ctg7-5347906-5348114	85.753	96.1758	72.925	23.2508	0.00213459	0.0396247	B3GNT3	51.0094	1.64275	2.79e-05	TRUE	FALSE	TRUE	FALSE	BosSINE2	-	4
ctg7-5365263-5365403	17.6357	3.6774	35.3347	-31.6573	0.00157064	0.0349295	B3GNT3	51.0094	1.64275	2.79e-05	TRUE	FALSE	FALSE	TRUE	BosSINE3	+	6
ctg7-5365546-5365685	13.4746	2.12266	27.4462	-25.3235	0.00164183	0.0362187	B3GNT3	51.0094	1.64275	2.79e-05	TRUE	FALSE	FALSE	TRUE	BosSINE2	-	4
ctg7-5496120-5496322	85.6661	90.6464	79.5365	11.1098	0.00252352	0.0430208	UNC13A	9.21118	-1.8667	0.00937659	TRUE	FALSE	TRUE	FALSE	BosSINE3	+	6
ctg7-58639189-58639314	77.6466	84.986	69.1134	15.8726	0.000139575	0.0148443	DPYSL3	70.3016	-1.9638	0.00764679	TRUE	FALSE	TRUE	FALSE	BosSINE6	+	3
ctg7-58667795-58667981	81.8095	86.6102	75.901	10.7092	5.9973e-05	0.011619	DPYSL3	70.3016	-1.9638	0.00764679	TRUE	FALSE	TRUE	FALSE	BosSINE3	-	4
ctg7-59801461-59801668	58.8635	68.4579	47.2123	21.2456	9.90217e-05	0.0132745	FBXO38	1346.97	1.07984	0.00312124	TRUE	FALSE	TRUE	FALSE	BosSINE3	+	5
ctg7-60941718-60941919	85.38	95.5602	72.5681	22.992	0.00024877	0.0167908	ARHGEF37	41.9597	-3.14307	0.000137277	TRUE	FALSE	TRUE	FALSE	BosSINE2	-	4
ctg7-61221498-61221773	76.9407	90.3853	59.8467	30.5386	0.000311152	0.0180281	PDE6A	2.47884	-2.69151	0.0227951	TRUE	FALSE	TRUE	FALSE	BosSINEL	-	7
ctg7-61268543-61268740	85.8129	91.3547	78.9923	12.3624	0.00108524	0.0293547	PDE6A	2.47884	-2.69151	0.0227951	TRUE	FALSE	TRUE	FALSE	BosSINE1	-	6
ctg7-61276173-61276397	76.9935	86.0047	65.9029	20.1018	0.00038477	0.0194558	PDE6A	2.47884	-2.69151	0.0227951	TRUE	FALSE	TRUE	FALSE	BosSINE2	+	4
ctg7-62166164-62166432	74.0617	81.4681	64.5831	16.8851	0.00103778	0.0285926	LOC112447457	3.47158	2.60103	0.0248644	TRUE	FALSE	TRUE	FALSE	BosSINEL	+	7
ctg7-62779042-62779168	81.8006	93.3969	67.5282	25.8687	0.00244891	0.0430208	FAT2	43.0315	-2.89243	0.000163476	TRUE	FALSE	TRUE	FALSE	BosSINE3	+	3
ctg7-62780284-62780556	76.6603	90.1024	60.1207	29.9818	0.000473624	0.0209513	FAT2	43.0315	-2.89243	0.000163476	TRUE	FALSE	TRUE	FALSE	BosSINEL	+	10
ctg7-62789635-62789910	79.6235	86.9942	70.7856	16.2087	0.00298141	0.0468558	FAT2	43.0315	-2.89243	0.000163476	TRUE	FALSE	TRUE	FALSE	BosSINEL	-	8
ctg7-69132696-69132921	72.5662	77.1831	66.4069	10.7762	0.00252352	0.0430208	ADAM19	2471	2.96561	2.14e-05	TRUE	FALSE	TRUE	FALSE	BosSINE2	-	5
ctg7-70514213-70514380	86.2202	90.7733	80.5991	10.1742	1.49417e-05	0.0093863	EBF1	24.2155	2.07951	0.0268625	TRUE	FALSE	TRUE	FALSE	BosSINE2	-	5
ctg7-71854122-71854265	84.35	94.2784	72.0862	22.1922	0.00147414	0.0334817	CCNJL	208.785	3.30865	2.62e-05	TRUE	FALSE	TRUE	FALSE	BosSINE3	-	4
ctg7-80356801-80357075	75.1053	86.066	61.9566	24.1094	0.00149782	0.0334817	WWC1	192.168	-2.97472	4.77e-05	TRUE	FALSE	TRUE	FALSE	BosSINEL	-	12
ctg7-80384969-80385099	78.7178	87.3291	68.4578	18.8713	0.00305752	0.0476466	WWC1	192.168	-2.97472	4.77e-05	TRUE	FALSE	TRUE	FALSE	BosSINE6	-	3
ctg7-80497847-80497975	85.1659	93.6625	74.4155	19.247	0.00307205	0.0476466	WWC1	192.168	-2.97472	4.77e-05	TRUE	TRUE	FALSE	FALSE	BosSINE6	+	3
ctg7-81000315-81000409	80.4406	90.4643	68.0566	22.4077	9.90217e-05	0.0132745	RASGRF2	6.4321	-2.14466	0.0395797	TRUE	FALSE	TRUE	FALSE	BosSINE3	-	4
ctg7-90033216-90033363	74.5414	85.0187	61.413	23.6058	0.00124915	0.0309714	MBLAC2	35.0763	-1.68836	0.000512973	TRUE	FALSE	TRUE	FALSE	BosSINE3	+	4
ctg7-90146726-90146940	88.7504	94.6578	81.4798	13.178	0.000350963	0.0194558	ADGRV1	66.8671	-2.55023	0.00113266	TRUE	FALSE	TRUE	FALSE	BosSINE3	-	4
ctg7-90381583-90381792	26.2978	12.926	42.7576	-29.8316	0.00210486	0.0396247	ADGRV1	66.8671	-2.55023	0.00113266	TRUE	FALSE	TRUE	FALSE	BosSINE1	+	3
ctg7-90490440-90490629	89.1332	96.0053	80.5677	15.4377	0.00182455	0.0370529	ADGRV1	66.8671	-2.55023	0.00113266	TRUE	FALSE	TRUE	FALSE	BosSINEL	+	5
ctg7-90560915-90561139	81.8914	89.574	72.4359	17.1381	0.000793191	0.026256	ADGRV1	66.8671	-2.55023	0.00113266	TRUE	FALSE	TRUE	FALSE	BosSINE2	-	3
ctg7-90578481-90578607	83.4153	92.5697	72.072	20.4976	0.00158966	0.0351234	ADGRV1	66.8671	-2.55023	0.00113266	TRUE	FALSE	TRUE	FALSE	BosSINE6	+	3
ctg7-90597740-90597951	79.1546	85.7656	71.0179	14.7477	0.00149782	0.0334817	ADGRV1	66.8671	-2.55023	0.00113266	TRUE	FALSE	TRUE	FALSE	BosSINE3	+	3
ctg7-95105763-95105981	87.6459	95.2717	78.5141	16.7576	0.000623067	0.0239174	RHOBTB3	312.937	-2.67885	1.45e-05	TRUE	FALSE	TRUE	FALSE	BosSINE2	-	3
ctg7-95105982-95106194	84.9873	94.6603	73.1288	21.5314	0.00015926	0.0148443	RHOBTB3	312.937	-2.67885	1.45e-05	TRUE	FALSE	TRUE	FALSE	BosSINE2	-	4
ctg7-95360331-95360604	91.7159	96.2842	86.0773	10.2068	9.90217e-05	0.0132745	LOC107132664	73.4663	1.5025	0.00547763	TRUE	FALSE	TRUE	FALSE	BosSINEL	+	6
ctg7-95399246-95399484	87.8138	94.6266	79.4288	15.1977	0.000858483	0.026256	LOC107132664	73.4663	1.5025	0.00547763	TRUE	FALSE	TRUE	FALSE	BosSINE3	+	4
ctg7-95452405-95452680	51.1839	42.6832	61.428	-18.7448	0.000126017	0.013894	LOC107132664	73.4663	1.5025	0.00547763	TRUE	FALSE	TRUE	FALSE	BosSINEL	-	8
ctg7-95501265-95501539	92.2734	97.0075	86.4469	10.5606	0.000176916	0.0158399	LOC107132664	73.4663	1.5025	0.00547763	TRUE	FALSE	TRUE	FALSE	BosSINEL	+	5
ctg7-95642524-95642727	66.6083	60.4389	74.2745	-13.8356	0.00298141	0.0468558	LOC107132664	73.4663	1.5025	0.00547763	TRUE	TRUE	FALSE	FALSE	BosSINE2	-	7
ctg7-95678271-95678370	90.9245	96.554	83.7648	12.7892	0.00265747	0.0446645	LOC107132664	73.4663	1.5025	0.00547763	TRUE	TRUE	FALSE	FALSE	BosSINE6	-	3
ctg7-98010209-98010324	46.9581	39.4763	56.1665	-16.6901	4.09643e-06	0.00846538	RGMB	112.167	-2.06938	0.000129314	TRUE	FALSE	TRUE	FALSE	BosSINE2	-	7
ctg8-100488354-100488628	87.3351	94.429	78.9241	15.5049	0.00298141	0.0468558	LPAR1	58.7406	-1.59384	0.000705422	TRUE	FALSE	TRUE	FALSE	BosSINEL	+	10
ctg8-102627124-102627295	82.3157	88.8012	74.4238	14.3773	0.00178879	0.0363949	BSPRY	118.568	-2.8767	0.000238727	TRUE	FALSE	TRUE	FALSE	BosSINE2	+	5
ctg8-10276978-10277102	42.2493	25.3499	61.7333	-36.3834	0.00212864	0.0396247	FBXO16	97.9064	-1.60461	0.0092861	TRUE	FALSE	TRUE	FALSE	BosSINEL	+	4
ctg8-110041264-110041569	82.6931	88.6302	75.3859	13.2443	0.00178879	0.0363949	MEGF9	842.977	1.34655	0.0133869	TRUE	FALSE	TRUE	FALSE	BosSINE1	-	3
ctg8-110107550-110107662	80.646	93.5573	64.7551	28.8022	2.00696e-05	0.0097305	MEGF9	842.977	1.34655	0.0133869	TRUE	FALSE	TRUE	FALSE	BosSINE2	+	3
ctg8-11134082-11134266	79.2272	89.1758	66.9827	22.1931	0.000311152	0.0180281	SCARA3	41.0601	-1.52306	0.0445556	TRUE	FALSE	TRUE	FALSE	BosSINE3	-	4
ctg8-11140434-11140650	80.1694	88.6093	69.7703	18.839	0.0013664	0.0331412	SCARA3	41.0601	-1.52306	0.0445556	TRUE	FALSE	TRUE	FALSE	BosSINE3	-	6
ctg8-11151485-11151686	87.1699	94.4027	78.0946	16.308	0.000246148	0.0167908	SCARA3	41.0601	-1.52306	0.0445556	TRUE	FALSE	TRUE	FALSE	BosSINE3	+	3
ctg8-11178729-11179003	68.0064	78.9062	54.5912	24.315	1.09926e-05	0.00901759	CLU	880.572	-1.70725	0.000612427	TRUE	FALSE	TRUE	FALSE	BosSINEL	-	7
ctg8-112798296-112798501	82.4414	88.5083	74.9744	13.534	0.00124915	0.0309714	SH3YL1	155.18	-1.71635	0.00119025	TRUE	FALSE	TRUE	FALSE	BosSINE2	+	3
ctg8-23891763-23891949	86.4552	92.3396	79.2128	13.1268	0.000707298	0.0243453	MLLT3	92.0766	-1.30102	0.0293286	TRUE	FALSE	TRUE	FALSE	BosSINE3	+	3
ctg8-25965563-25965765	82.3603	77.0552	89.4452	-12.39	1.49417e-05	0.0093863	ADAMTSL1	3.16221	-3.16725	0.0419528	TRUE	FALSE	TRUE	FALSE	BosSINE2	+	3
ctg8-26042505-26042717	76.5581	84.2617	66.9073	17.3543	7.73607e-05	0.0124599	ADAMTSL1	3.16221	-3.16725	0.0419528	TRUE	FALSE	TRUE	FALSE	BosSINE3	-	3
ctg8-29803554-29803747	79.6726	90.219	67.4678	22.7512	2.00696e-05	0.0097305	LOC101903205	272.255	-4.26753	8.19e-06	TRUE	FALSE	TRUE	FALSE	BosSINE3	+	5
ctg8-29887351-29887558	83.8407	92.2122	73.5331	18.6791	0.000200254	0.0158399	NFIB	1578.08	-3.67052	3.94e-05	TRUE	FALSE	TRUE	FALSE	BosSINE3	-	5
ctg8-29907125-29907251	78.1772	87.7414	66.4058	21.3356	1.97454e-06	0.00754262	NFIB	1578.08	-3.67052	3.94e-05	TRUE	FALSE	TRUE	FALSE	BosSINE2	+	4
ctg8-29911672-29911844	73.3014	84.8898	58.1106	26.7793	0.00149782	0.0334817	NFIB	1578.08	-3.67052	3.94e-05	TRUE	FALSE	TRUE	FALSE	BosSINEL	+	4
ctg8-29939835-29940053	84.8573	96.4027	73.064	23.3388	6.72233e-05	0.0124599	NFIB	1578.08	-3.67052	3.94e-05	TRUE	FALSE	TRUE	FALSE	BosSINE2	+	5
ctg8-29984593-29984816	62.1776	72.7977	49.1067	23.6909	0.000126017	0.013894	NFIB	1578.08	-3.67052	3.94e-05	TRUE	FALSE	TRUE	FALSE	BosSINE3	+	4
ctg8-30017889-30017963	70.9662	80.0206	59.8718	20.1488	0.00178879	0.0363949	NFIB	1578.08	-3.67052	3.94e-05	TRUE	FALSE	TRUE	FALSE	BosSINE3	-	3
ctg8-30026084-30026356	84.8927	94.1784	74.0015	20.1769	0.00147215	0.0334817	NFIB	1578.08	-3.67052	3.94e-05	TRUE	FALSE	TRUE	FALSE	BosSINEL	-	5
ctg8-34270213-34270482	83.2601	89.2865	75.3181	13.9684	0.00212864	0.0396247	PTPRD	9.90203	-2.51611	0.0382409	TRUE	FALSE	TRUE	FALSE	BosSINEL	+	6
ctg8-34516075-34516207	76.0345	81.5648	69.2279	12.337	0.000580014	0.0224556	PTPRD	9.90203	-2.51611	0.0382409	TRUE	FALSE	TRUE	FALSE	BosSINEL	+	4
ctg8-34528847-34528983	78.2771	85.6577	69.9692	15.6885	0.00151984	0.0338594	PTPRD	9.90203	-2.51611	0.0382409	TRUE	FALSE	TRUE	FALSE	BosSINE3	+	3
ctg8-34549171-34549377	75.9771	81.5238	69.7917	11.7321	0.00183285	0.0371616	PTPRD	9.90203	-2.51611	0.0382409	TRUE	FALSE	TRUE	FALSE	BosSINEL	-	4
ctg8-34572614-34572917	72.127	76.9428	66.1529	10.7899	0.00298141	0.0468558	PTPRD	9.90203	-2.51611	0.0382409	TRUE	FALSE	TRUE	FALSE	BosSINE1	+	4
ctg8-34616902-34617110	69.444	78.6192	57.975	20.6442	0.000580014	0.0224556	PTPRD	9.90203	-2.51611	0.0382409	TRUE	FALSE	TRUE	FALSE	BosSINE3	-	4
ctg8-34616915-34617134	69.444	78.6192	57.975	20.6442	0.000580014	0.0224556	PTPRD	9.90203	-2.51611	0.0382409	TRUE	FALSE	TRUE	FALSE	BosSINE1	-	4
ctg8-36403801-36404034	83.0406	78.5037	88.9383	-10.4345	4.62101e-05	0.0113782	PTPRD	9.90203	-2.51611	0.0382409	TRUE	FALSE	TRUE	FALSE	BosSINE2	+	5
ctg8-36509427-36509630	71.7508	65.6609	79.2255	-13.5646	0.000473624	0.0209513	PTPRD	9.90203	-2.51611	0.0382409	TRUE	FALSE	TRUE	FALSE	BosSINE1	-	5
ctg8-39145341-39145558	87.546	92.4031	81.5679	10.8352	0.00103778	0.0285926	LOC104969334	171.791	2.361	9.94e-05	TRUE	TRUE	FALSE	FALSE	BosSINE2	-	3
ctg8-39474169-39474444	82.5564	91.7777	71.2071	20.5705	3.52765e-05	0.0107934	JAK2	2314.93	1.44154	0.000873317	TRUE	FALSE	TRUE	FALSE	BosSINEL	-	7
ctg8-39490365-39490489	89.9546	94.8406	83.941	10.8996	0.000250236	0.0167908	JAK2	2314.93	1.44154	0.000873317	TRUE	FALSE	TRUE	FALSE	BosSINE3	-	3
ctg8-39906895-39907006	81.042	76.2198	86.9769	-10.7571	0.0013664	0.0331412	SPATA6L	30.968	1.83379	0.00775451	TRUE	FALSE	TRUE	FALSE	BosSINE2	+	3
ctg8-39995655-39995885	85.3276	93.6492	75.0856	18.5636	0.000858483	0.026256	SLC1A1	42.4272	-1.9048	0.018752	TRUE	FALSE	TRUE	FALSE	BosSINE2	-	4
ctg8-43943246-43943427	83.7983	93.2027	72.6244	20.5783	0.000296533	0.0180281	KANK1	617.725	-1.27964	0.00325205	TRUE	FALSE	TRUE	FALSE	BosSINE3	-	3
ctg8-45313549-45313742	80.5462	89.1927	70.6611	18.5316	0.00015926	0.0148443	TJP2	501.983	-1.81232	0.000730088	TRUE	FALSE	FALSE	TRUE	BosSINE2	-	4
ctg8-45331441-45331569	55.0075	62.6	45.6628	16.9372	0.000176916	0.0158399	TJP2	501.983	-1.81232	0.000730088	TRUE	FALSE	TRUE	FALSE	BosSINE2	-	3
ctg8-45338048-45338322	79.8158	88.6664	69.6528	19.0136	0.000200254	0.0158399	TJP2	501.983	-1.81232	0.000730088	TRUE	FALSE	TRUE	FALSE	BosSINEL	+	8
ctg8-45351348-45351478	87.5686	94.2033	78.4992	15.7041	0.000359381	0.0194558	TJP2	501.983	-1.81232	0.000730088	TRUE	FALSE	TRUE	FALSE	BosSINE6	-	3
ctg8-45362652-45362846	81.1654	87.4219	73.4982	13.9236	0.00178879	0.0363949	TJP2	501.983	-1.81232	0.000730088	TRUE	FALSE	TRUE	FALSE	BosSINE3	-	4
ctg8-59533265-59533482	79.408	91.0771	65.0462	26.0309	0.000707298	0.0243453	UNC13B	347.396	-3.21687	2.83e-05	TRUE	FALSE	TRUE	FALSE	BosSINE2	+	3
ctg8-62124606-62124819	83.6755	93.5723	71.491	22.0813	0.000250089	0.0167908	SHB	42.337	-1.2364	0.00256665	TRUE	FALSE	TRUE	FALSE	BosSINE2	-	3
ctg8-62684360-62684501	89.7128	98.1044	79.3846	18.7198	0.000462012	0.0209513	TDRD7	1008.54	1.31976	0.00135764	TRUE	FALSE	TRUE	FALSE	BosSINEL	+	5
ctg8-62743899-62744048	78.8914	85.1828	71.1481	14.0347	0.00212864	0.0396247	TMOD1	8.96839	-1.62133	0.0168397	TRUE	FALSE	TRUE	FALSE	BosSINEL	+	4
ctg8-66991536-66991716	82.8282	91.3622	72.4676	18.8946	0.000473624	0.0209513	LPL	4485.88	-1.99323	2.13e-06	TRUE	FALSE	TRUE	FALSE	BosSINE2	+	5
ctg8-66992315-66992589	51.5834	57.8215	44.0308	13.7907	0.00178879	0.0363949	LPL	4485.88	-1.99323	2.13e-06	TRUE	FALSE	TRUE	FALSE	BosSINEL	+	7
ctg8-67427855-67428073	50.771	57.1525	42.9169	14.2356	7.73607e-05	0.0124599	LZTS1	7.16636	-1.97523	0.003844	TRUE	FALSE	TRUE	FALSE	BosSINE2	-	5
ctg8-69682033-69682252	86.5241	94.276	76.9833	17.2927	0.000732573	0.0250149	SLC39A14	190.783	-1.09317	0.00233072	TRUE	TRUE	FALSE	FALSE	BosSINE2	-	3
ctg8-69686830-69687032	87.0357	92.0867	81.2077	10.879	0.00038477	0.0194558	SLC39A14	190.783	-1.09317	0.00233072	TRUE	TRUE	FALSE	FALSE	BosSINE3	-	3
ctg8-69688085-69688265	60.7183	67.8547	52.4767	15.378	0.000580014	0.0224556	SLC39A14	190.783	-1.09317	0.00233072	TRUE	TRUE	FALSE	FALSE	BosSINE3	-	3
ctg8-69693789-69694064	74.6984	83.6353	63.7778	19.8575	0.000311152	0.0180281	SLC39A14	190.783	-1.09317	0.00233072	TRUE	TRUE	FALSE	FALSE	BosSINEL	-	6
ctg8-70098230-70098440	81.8552	91.7305	69.701	22.0295	0.00103778	0.0285926	PEBP4	18.1426	-1.4181	0.0222946	TRUE	FALSE	TRUE	FALSE	BosSINE3	-	4
ctg8-70173075-70173243	80.9839	90.4594	69.3218	21.1376	0.00298141	0.0468558	PEBP4	18.1426	-1.4181	0.0222946	TRUE	FALSE	TRUE	FALSE	BosSINE3	+	3
ctg8-70592430-70592636	75.273	89.1271	58.2218	30.9053	0.000200254	0.0158399	LOC107132707	27.975	3.75008	0.0002739	TRUE	TRUE	FALSE	FALSE	BosSINE3	+	3
ctg8-70632100-70632299	80.9925	91.3481	67.0061	24.342	0.00158792	0.0351234	LOC107132707	27.975	3.75008	0.0002739	TRUE	FALSE	TRUE	FALSE	BosSINE3	-	3
ctg8-70988484-70988677	61.8209	70.9881	50.4895	20.4986	0.00212864	0.0396247	STC1	5.29642	-3.44819	0.0133268	TRUE	FALSE	TRUE	FALSE	BosSINE3	-	3
ctg8-71601700-71601908	87.4572	93.665	80.4213	13.2437	0.00220078	0.0406247	ADAMDEC1	474.857	1.92218	0.00754384	TRUE	FALSE	TRUE	FALSE	BosSINE3	-	3
ctg8-74475093-74475302	72.6014	67.6471	78.6236	-10.9764	0.00178879	0.0363949	PTK2B	4074.49	1.94016	4.06e-05	TRUE	FALSE	TRUE	FALSE	BosSINE3	-	8
ctg8-74485030-74485240	23.3388	8.00547	42.2106	-34.2051	0.000707298	0.0243453	PTK2B	4074.49	1.94016	4.06e-05	TRUE	FALSE	TRUE	FALSE	BosSINE3	-	4
ctg8-74521504-74521712	88.2189	98.1411	76.0541	22.087	8.16041e-05	0.0130323	PTK2B	4074.49	1.94016	4.06e-05	TRUE	FALSE	TRUE	FALSE	BosSINE2	-	4
ctg8-74551088-74551362	68.8638	61.5233	77.9027	-16.3794	0.00212864	0.0396247	PTK2B	4074.49	1.94016	4.06e-05	TRUE	FALSE	TRUE	FALSE	BosSINEL	-	7
ctg8-74590217-74590352	78.7351	94.3031	59.5744	34.7288	0.000575562	0.0224556	EPHX2	10.1649	-2.3537	0.00111794	TRUE	FALSE	FALSE	TRUE	BosSINE3	-	3
ctg8-74591790-74591983	26.9816	31.9293	21.1317	10.7977	0.000473624	0.0209513	EPHX2	10.1649	-2.3537	0.00111794	TRUE	FALSE	TRUE	FALSE	BosSINE1	+	8
ctg8-76265393-76265608	78.4135	93.8726	59.0782	34.7944	2.00696e-05	0.0097305	RASEF	418.737	-5.55051	3.57e-07	TRUE	FALSE	TRUE	FALSE	BosSINE2	-	4
ctg8-78081748-78082013	78.5532	83.9428	72.1321	11.8107	0.00103778	0.0285926	NTRK2	8.35805	-3.82275	0.00220123	TRUE	FALSE	TRUE	FALSE	BosSINEL	-	5
ctg8-7862854-7863065	14.403	1.77188	30.7704	-28.9985	0.000918948	0.0278673	BLK	78.6578	1.4131	0.0301563	TRUE	FALSE	TRUE	FALSE	BosSINE3	+	3
ctg8-84690836-84691103	58.5877	50.0457	69.166	-19.1203	9.90217e-05	0.0132745	WNK2	120.017	-1.98709	0.000234747	TRUE	FALSE	TRUE	FALSE	BosSINEL	-	6
ctg8-88697511-88697718	87.7744	94.5938	79.3814	15.2123	0.000858483	0.026256	SEMA4D	5441.5	1.69673	3.5e-05	TRUE	FALSE	TRUE	FALSE	BosSINE3	+	6
ctg8-928172-928382	80.8537	87.2128	73.1567	14.0561	5.9973e-05	0.011619	PALLD	77.054	-2.12732	0.000147716	TRUE	FALSE	TRUE	FALSE	BosSINE2	-	4
ctg8-98741580-98741807	75.8609	90.0857	59.0628	31.0229	0.000858483	0.026256	EPB41L4B	207.412	-3.93583	7.57e-06	TRUE	FALSE	TRUE	FALSE	BosSINE2	-	3
ctg8-98827466-98827683	75.1829	88.564	58.9192	29.6448	4.62101e-05	0.0113782	EPB41L4B	207.412	-3.93583	7.57e-06	TRUE	FALSE	TRUE	FALSE	BosSINE3	+	5
ctg8-98858496-98858679	74.3081	85.5522	61.0137	24.5386	0.000200254	0.0158399	EPB41L4B	207.412	-3.93583	7.57e-06	TRUE	FALSE	TRUE	FALSE	BosSINEL	-	5
ctg8-98869806-98869856	73.4655	86.6086	57.2894	29.3192	1.09926e-05	0.00901759	EPB41L4B	207.412	-3.93583	7.57e-06	TRUE	FALSE	FALSE	TRUE	BosSINE2	-	4
ctg8-99004221-99004409	74.5889	87.3938	58.1068	29.287	5.9973e-05	0.011619	PTPN3	40.2803	-2.96741	7.87e-05	TRUE	FALSE	TRUE	FALSE	BosSINE2	+	5
ctg8-99013480-99013746	67.1005	75.6054	56.633	18.9724	0.00298141	0.0468558	PTPN3	40.2803	-2.96741	7.87e-05	TRUE	FALSE	TRUE	FALSE	BosSINEL	-	7
ctg8-99027825-99028077	81.1136	85.6461	75.6038	10.0423	0.000250236	0.0167908	PTPN3	40.2803	-2.96741	7.87e-05	TRUE	FALSE	TRUE	FALSE	BosSINEL	+	8
ctg8-99059682-99059956	82.2259	89.3878	73.9622	15.4256	0.000108327	0.013894	PTPN3	40.2803	-2.96741	7.87e-05	TRUE	FALSE	TRUE	FALSE	BosSINEL	+	6
ctg8-99063122-99063322	79.5617	87.3653	70.0583	17.3069	0.000250236	0.0167908	PTPN3	40.2803	-2.96741	7.87e-05	TRUE	FALSE	TRUE	FALSE	BosSINE3	-	6
ctg9-12119184-12119380	75.8952	85.6805	64.2413	21.4391	0.000707298	0.0243453	LOC112448016	20.9773	2.02768	0.000450821	TRUE	TRUE	FALSE	FALSE	BosSINE2	+	4
ctg9-13242881-13243090	79.0128	85.6172	70.7264	14.8907	0.000126017	0.013894	CD109	188.869	-2.50408	2.32e-05	TRUE	FALSE	TRUE	FALSE	BosSINE3	-	4
ctg9-14690218-14690423	72.9677	83.4016	60.126	23.2756	0.000250236	0.0167908	COL12A1	32.9047	-3.29643	3.79e-05	TRUE	FALSE	TRUE	FALSE	BosSINE3	+	4
ctg9-15396070-15396248	28.0137	17.9176	39.8378	-21.9203	0.000707298	0.0243453	MYO6	274.857	-1.86872	2.49e-05	TRUE	FALSE	FALSE	TRUE	BosSINE3	-	5
ctg9-19266029-19266237	74.0845	86.3009	59.0489	27.252	9.90217e-05	0.0132745	SH3BGRL2	1124.05	-4.80999	3.81e-07	TRUE	FALSE	TRUE	FALSE	BosSINEL	+	7
ctg9-19282042-19282253	71.6978	80.525	60.6665	19.8585	0.000732573	0.0250149	SH3BGRL2	1124.05	-4.80999	3.81e-07	TRUE	FALSE	TRUE	FALSE	BosSINE3	+	4
ctg9-19291994-19292098	88.5621	96.0792	79.3103	16.7689	0.00224827	0.0414285	SH3BGRL2	1124.05	-4.80999	3.81e-07	TRUE	FALSE	TRUE	FALSE	BosSINE2	-	3
ctg9-19296734-19296815	85.4213	94.3552	74.9279	19.4273	0.000858483	0.026256	SH3BGRL2	1124.05	-4.80999	3.81e-07	TRUE	FALSE	TRUE	FALSE	BosSINE3	+	4
ctg9-23958309-23958578	85.6115	94.9102	73.8959	21.0143	1.32618e-06	0.00754262	ECHDC1	1026.6	-2.58151	0.000166422	TRUE	FALSE	TRUE	FALSE	BosSINEL	+	10
ctg9-26034823-26035037	86.5029	92.219	79.6242	12.5948	0.000200254	0.0158399	TPD52L1	90.1017	-6.0671	7.75e-06	TRUE	FALSE	TRUE	FALSE	BosSINE2	-	6
ctg9-26059509-26059680	82.7476	87.4821	77.0625	10.4196	0.00103778	0.0285926	TPD52L1	90.1017	-6.0671	7.75e-06	TRUE	FALSE	TRUE	FALSE	BosSINE3	+	4
ctg9-26400034-26400309	84.0767	93.8758	72.3878	21.4881	0.00015926	0.0148443	NKAIN2	2.05123	-3.09537	0.0489135	TRUE	FALSE	TRUE	FALSE	BosSINEL	+	8
ctg9-26927375-26927484	60.2925	68.7898	49.855	18.9348	0.00178879	0.0363949	NKAIN2	2.05123	-3.09537	0.0489135	TRUE	FALSE	TRUE	FALSE	BosSINEL	+	5
ctg9-27189282-27189482	77.2593	92.1897	59.3338	32.8559	4.97299e-05	0.011619	NKAIN2	2.05123	-3.09537	0.0489135	TRUE	FALSE	TRUE	FALSE	BosSINE3	+	5
ctg9-34591475-34591658	86.1701	93.9052	76.2591	17.6461	0.00212918	0.0396247	FRK	29.9056	-3.11224	0.000167	TRUE	FALSE	FALSE	TRUE	BosSINE2	-	3
ctg9-34592015-34592225	90.0316	96.2836	82.791	13.4926	0.000101805	0.0135938	FRK	29.9056	-3.11224	0.000167	TRUE	FALSE	FALSE	TRUE	BosSINE3	+	3
ctg9-34601116-34601298	79.4248	86.0359	71.4742	14.5616	0.000600557	0.0232129	FRK	29.9056	-3.11224	0.000167	TRUE	FALSE	TRUE	FALSE	BosSINE2	-	4
ctg9-37042842-37043111	82.0467	91.7638	70.7179	21.0459	0.000473624	0.0209513	LOC104969531	52.2748	4.36333	1.49e-07	TRUE	FALSE	TRUE	FALSE	BosSINEL	+	7
ctg9-37065110-37065397	87.6635	92.1646	81.9525	10.2121	9.90217e-05	0.0132745	LOC104969531	52.2748	4.36333	1.49e-07	TRUE	FALSE	TRUE	FALSE	BosSINEL	+	5
ctg9-37071573-37071707	87.3587	93.768	79.3051	14.4628	0.00178879	0.0363949	LOC104969531	52.2748	4.36333	1.49e-07	TRUE	TRUE	FALSE	FALSE	BosSINE2	-	4
ctg9-37076196-37076470	85.8502	93.7735	76.4986	17.2749	9.90217e-05	0.0132745	LOC104969531	52.2748	4.36333	1.49e-07	TRUE	TRUE	FALSE	FALSE	BosSINEL	+	11
ctg9-37106636-37106893	87.6845	93.2433	80.888	12.3553	0.000676282	0.0243453	LOC104969531	52.2748	4.36333	1.49e-07	TRUE	TRUE	FALSE	FALSE	BosSINEL	+	4
ctg9-42310697-42310884	85.6599	94.2958	75.5109	18.7849	0.00266198	0.0446645	SCML4	166.718	-1.46406	0.0312981	TRUE	FALSE	TRUE	FALSE	BosSINE3	-	6
ctg9-60603827-60604101	84.3804	91.538	76.0885	15.4495	0.00149782	0.0334817	ANKRD6	28.5836	-2.56026	0.00151734	TRUE	FALSE	TRUE	FALSE	BosSINEL	+	6
ctg9-61060053-61060320	68.5556	62.5967	75.4308	-12.8341	0.00149782	0.0334817	LOC104969735	25.1529	2.10509	0.000775313	TRUE	TRUE	FALSE	FALSE	BosSINEL	+	4
ctg9-62657331-62657552	88.7464	95.7821	79.5474	16.2347	0.000656807	0.0243453	ZNF292	5054.15	2.03283	1.41e-05	TRUE	FALSE	TRUE	FALSE	BosSINE2	-	4
ctg9-62661441-62661617	89.4569	97.2354	79.8833	17.3521	0.0015722	0.0349579	ZNF292	5054.15	2.03283	1.41e-05	TRUE	FALSE	TRUE	FALSE	BosSINE3	+	3
ctg9-66073570-66073834	78.8461	73.9767	85.2614	-11.2847	0.000477339	0.0210762	PTPRK	231.87	-3.00674	8.63e-05	TRUE	FALSE	TRUE	FALSE	BosSINEL	-	5
ctg9-66542772-66543030	78.7661	87.5449	68.3466	19.1983	0.00103778	0.0285926	PTPRK	231.87	-3.00674	8.63e-05	TRUE	FALSE	TRUE	FALSE	BosSINEL	-	9
ctg9-66620918-66621109	75.1323	89.7374	56.4759	33.2615	9.90217e-05	0.0132745	PTPRK	231.87	-3.00674	8.63e-05	TRUE	FALSE	FALSE	TRUE	BosSINE2	+	3
ctg9-71630418-71630473	81.9655	91.3414	70.426	20.9154	0.00015926	0.0148443	EYA4	7.66534	-3.85194	0.00145806	TRUE	FALSE	TRUE	FALSE	BosSINE1	-	4
ctg9-74527429-74527693	84.7604	93.4267	74.7606	18.6661	0.000473624	0.0209513	MAP7	186.667	-3.12451	2.65e-05	TRUE	TRUE	FALSE	FALSE	BosSINEL	+	8
ctg9-75097179-75097384	81.7573	93.4047	66.9341	26.4706	0.000793191	0.026256	IFNGR1	3752.74	1.66237	0.000558136	TRUE	FALSE	TRUE	FALSE	BosSINE3	-	3
ctg9-75106820-75106939	12.1112	4.06094	22.0192	-17.9583	0.000311152	0.0180281	IFNGR1	3752.74	1.66237	0.000558136	TRUE	FALSE	FALSE	TRUE	BosSINEL	-	4
ctg9-76247290-76247553	74.0348	89.7273	53.8797	35.8476	0.000580014	0.0224556	NHSL1	98.1992	-1.41221	0.000686094	TRUE	FALSE	TRUE	FALSE	BosSINEL	-	7
ctg9-76280560-76280759	84.2504	89.5883	77.6808	11.9075	0.00212864	0.0396247	NHSL1	98.1992	-1.41221	0.000686094	TRUE	FALSE	TRUE	FALSE	BosSINE3	+	4
ctg9-81027633-81027721	67.4351	60.3385	76.1692	-15.8307	0.00124915	0.0309714	PHACTR2	2097.89	1.08985	0.000166677	TRUE	FALSE	TRUE	FALSE	BosSINE6	-	3
ctg9-81221416-81221636	91.3129	96.5417	85.0865	11.4552	0.0011691	0.0309714	PHACTR2	2097.89	1.08985	0.000166677	TRUE	FALSE	TRUE	FALSE	BosSINE2	+	4
ctg9-81559928-81560102	78.0529	85.4417	68.959	16.4827	0.000858483	0.026256	STX11	1220.21	2.76638	5.87e-06	TRUE	FALSE	TRUE	FALSE	BosSINE4	-	3
ctg9-83949053-83949378	86.6139	93.1906	78.6491	14.5416	5.9973e-05	0.011619	ADGB	38.833	1.39643	0.00152475	TRUE	FALSE	TRUE	FALSE	BosSINE1	+	3
ctg9-83996851-83997061	88.7189	94.7814	81.4438	13.3375	0.000574659	0.0224556	ADGB	38.833	1.39643	0.00152475	TRUE	FALSE	TRUE	FALSE	BosSINE3	-	5
ctg9-88839816-88840010	90.3814	95.4071	85.1686	10.2385	0.000391908	0.019785	ESR1	245.421	-3.38145	2.33e-05	TRUE	FALSE	TRUE	FALSE	BosSINE3	-	4
ctg9-89001259-89001534	88.73	93.4477	82.7914	10.6562	0.000858483	0.026256	ESR1	245.421	-3.38145	2.33e-05	TRUE	FALSE	TRUE	FALSE	BosSINEL	+	4
ctg9-89025204-89025418	86.4648	91.7617	79.4744	12.2873	0.000707298	0.0243453	ESR1	245.421	-3.38145	2.33e-05	TRUE	FALSE	TRUE	FALSE	BosSINE2	-	4
ctg9-89054952-89055167	84.5402	89.7836	78.3675	11.4161	0.00230253	0.0418835	ESR1	245.421	-3.38145	2.33e-05	TRUE	FALSE	TRUE	FALSE	BosSINE3	+	4
ctg9-89063791-89064006	89.9613	94.6443	84.256	10.3884	0.00266198	0.0446645	ESR1	245.421	-3.38145	2.33e-05	TRUE	FALSE	TRUE	FALSE	BosSINE2	+	3
ctg9-89181972-89182169	91.9866	98.0007	84.6167	13.384	0.000121633	0.013894	SYNE1	4323.95	1.05266	0.0222846	TRUE	FALSE	TRUE	FALSE	BosSINE2	-	3
ctg9-89200508-89200739	92.08	97.6459	85.472	12.1739	0.000226704	0.0167908	SYNE1	4323.95	1.05266	0.0222846	TRUE	FALSE	TRUE	FALSE	BosSINE2	+	3
ctg9-89254283-89254547	92.6317	97.0803	87.0557	10.0245	0.0014074	0.0334817	SYNE1	4323.95	1.05266	0.0222846	TRUE	FALSE	TRUE	FALSE	BosSINEL	+	5
ctg9-89290339-89290401	29.5539	12.1784	49.5526	-37.3742	0.000572858	0.0224556	SYNE1	4323.95	1.05266	0.0222846	TRUE	FALSE	TRUE	FALSE	BosSINE2	-	3
ctg9-89608711-89608924	81.2211	89.0492	71.6679	17.3812	0.000707298	0.0243453	SYNE1	4323.95	1.05266	0.0222846	TRUE	FALSE	TRUE	FALSE	BosSINE2	+	3
ctg9-90009410-90009600	86.1044	91.3724	79.2572	12.1151	3.52765e-05	0.0107934	RGS17	3.65423	-3.77851	0.00120191	TRUE	FALSE	TRUE	FALSE	BosSINEL	+	10
ctg9-91130476-91130653	81.338	91.6368	68.5659	23.0709	3.52765e-05	0.0107934	CNKSR3	19.5635	-2.02085	0.000292023	TRUE	FALSE	TRUE	FALSE	BosSINE2	+	3
ctg9-91777378-91777501	78.2458	90.6808	63.55	27.1308	0.00305722	0.0476466	TIAM2	545.98	2.70723	8.49e-05	TRUE	FALSE	TRUE	FALSE	BosSINE3	-	4
ctg9-91778459-91778650	77.3144	85.8365	66.8256	19.0108	9.90217e-05	0.0132745	TIAM2	545.98	2.70723	8.49e-05	TRUE	FALSE	TRUE	FALSE	BosSINE2	+	3
ctg9-9321258-9321527	78.0496	89.2676	64.2428	25.0248	4.62101e-05	0.0113782	COL9A1	41.9973	-6.13343	1.24e-05	TRUE	FALSE	TRUE	FALSE	BosSINEL	-	8
ctg9-94545537-94545701	83.9783	91.6376	74.7523	16.8853	0.00149782	0.0334817	SYNJ2	197.016	-2.10508	0.000199041	TRUE	FALSE	TRUE	FALSE	BosSINEL	+	4
ctg9-95998930-95999104	78.1264	85.675	68.8359	16.8391	5.9973e-05	0.011619	WTAP	1504.59	1.1982	0.00111794	TRUE	TRUE	TRUE	FALSE	BosSINE3	-	3

## Sheet: S5B_DM_LINE_overlap_DEgene
Table S5B Differentially methylated LINE retrotransposons overlap with differentially expressed genes related to Subclinical mastitis
ID (a unique identifier based on LINE genomic coordinates, combining chromosome, start, and end positions)	mean DNA methylation level in all samples	mean DNA methylation level in samples with S.aureus subclinical masistiis	mean DNA methylation level in controls samples	DNA methylation change	p_value	p_adj	gene	baseMean	log2FoldChange	padj	family	strand	n_cpg	If overlap with gene	If overlap with exon	If overlap with intron	If overlap with promoter
ctg1-107652499-107652988	77.7376	82.955	71.3162	11.6388	0.00149782	0.0450387	SCHIP1	24.9911	-1.93573	7.13e-05	BosBovB	-	5	TRUE	FALSE	TRUE	FALSE
ctg1-113397256-113397362	90.0803	96.9805	82.1716	14.8089	0.000591754	0.0328095	ARHGEF26	111.628	-3.62293	1.15e-05	BosBovB	-	4	TRUE	FALSE	TRUE	FALSE
ctg1-116889378-116889500	49.9293	56.849	41.4128	15.4361	0.000473624	0.0303043	MED12L	147.836	1.03782	0.0128677	BosBovB	-	3	TRUE	FALSE	TRUE	FALSE
ctg1-142194953-142195637	87.5169	92.2882	81.5674	10.7208	0.00184607	0.0497498	C2CD2	110.813	-1.52558	5.46e-06	BosBovB	-	3	TRUE	FALSE	TRUE	FALSE
ctg1-142536984-142537135	74.1059	69.5914	79.9729	-10.3815	0.00124915	0.0422702	ABCG1	363.168	1.92361	0.00140137	BosBovB	-	4	TRUE	FALSE	TRUE	FALSE
ctg1-145031453-145032105	73.7	81.3187	64.3231	16.9957	0.000473624	0.0303043	ADARB1	172.601	-1.16128	0.0032829	BosL1A4	+	4	TRUE	FALSE	TRUE	FALSE
ctg1-145492641-145493592	81.5007	87.8284	73.7029	14.1255	3.52765e-05	0.0168683	PCBP3	14.6669	-2.06395	0.00267358	BosL1B	-	4	TRUE	FALSE	TRUE	FALSE
ctg1-150704851-150705554	86.0471	91.2765	79.4821	11.7945	0.00149782	0.0450387	ERG	54.6941	1.52704	0.00411014	BosBovB	+	6	TRUE	FALSE	TRUE	FALSE
ctg1-150712867-150713046	15.6272	3.59095	30.7667	-27.1757	0.000265387	0.0262875	ERG	54.6941	1.52704	0.00411014	BosL1B	+	3	TRUE	FALSE	TRUE	FALSE
ctg1-150712878-150713066	15.6272	3.59095	30.7667	-27.1757	0.000265387	0.0262875	ERG	54.6941	1.52704	0.00411014	BosL1A7	+	3	TRUE	FALSE	TRUE	FALSE
ctg1-150760675-150761145	83.0314	89.6763	74.9184	14.7579	0.000311152	0.0262875	ERG	54.6941	1.52704	0.00411014	BosBovB	-	4	TRUE	FALSE	TRUE	FALSE
ctg1-150922974-150923588	80.4579	86.8471	72.7278	14.1193	0.00038477	0.028234	ERG	54.6941	1.52704	0.00411014	BosBovB	-	3	TRUE	FALSE	TRUE	FALSE
ctg1-41037310-41037639	75.1301	81.5998	66.7864	14.8134	0.000200254	0.0236464	EPHA6	2.31299	-3.43001	0.0465657	BosBovB	+	4	TRUE	FALSE	TRUE	FALSE
ctg1-41624124-41625175	45.114	38.7301	52.8408	-14.1106	0.000858483	0.0368467	EPHA6	2.31299	-3.43001	0.0465657	BosBovB	+	5	TRUE	FALSE	TRUE	FALSE
ctg1-43032389-43032535	24.2098	8.89896	42.4731	-33.5741	0.00038477	0.028234	ST3GAL6	947.698	1.23889	2.58e-05	BosBovB	-	4	TRUE	FALSE	TRUE	FALSE
ctg1-43078535-43079045	71.1147	66.0042	77.4045	-11.4003	0.000858483	0.0368467	ST3GAL6	947.698	1.23889	2.58e-05	BosBovB	-	6	TRUE	FALSE	TRUE	FALSE
ctg1-45199671-45199770	91.3628	96.1161	85.8782	10.2379	0.00068698	0.0344551	ABI3BP	2.07121	-3.11223	0.0251641	BosBovB	-	6	TRUE	FALSE	TRUE	FALSE
ctg1-49957282-49957726	90.9025	96.4696	84.1974	12.2721	0.00136453	0.0450387	ALCAM	2208.03	1.09066	0.00154662	BosBovB	+	3	TRUE	FALSE	TRUE	FALSE
ctg1-65702200-65703496	77.1344	81.9688	70.9998	10.969	0.00015926	0.0223249	STXBP5L	3.27303	-3.58522	0.0141306	BosL1A6	-	5	TRUE	FALSE	TRUE	FALSE
ctg1-65750935-65752464	78.7282	86.0038	69.7735	16.2303	0.000250236	0.0249233	STXBP5L	3.27303	-3.58522	0.0141306	BosL1B	-	9	TRUE	FALSE	TRUE	FALSE
ctg1-6843448-6843653	80.7747	91.8076	67.4534	24.3542	0.000200254	0.0236464	BACH1	3687.93	1.37376	0.000867828	BosBovB	+	8	TRUE	FALSE	TRUE	FALSE
ctg1-73885878-73885984	84.7955	94.0813	73.5062	20.5751	0.000580014	0.032187	LOC104970904	2.8435	-7.32827	8.93e-05	BosBovB	-	5	TRUE	FALSE	TRUE	FALSE
ctg1-73895785-73895851	87.9843	94.3191	80.2997	14.0194	5.9973e-05	0.0184022	ATP13A4	169.758	-2.34846	0.0148312	BosBovB	-	4	TRUE	FALSE	TRUE	FALSE
ctg1-73952027-73952851	85.6803	93.4698	76.3247	17.1451	0.000200254	0.0236464	ATP13A4	169.758	-2.34846	0.0148312	BosBovB	-	4	TRUE	FALSE	TRUE	FALSE
ctg1-80904964-80905813	88.7026	94.0625	82.1058	11.9567	0.00124915	0.0422702	DGKG	74.0567	1.37028	0.026941	BosL1B	-	4	TRUE	FALSE	TRUE	FALSE
ctg1-81850448-81850743	71.279	76.776	64.8006	11.9754	0.00124915	0.0422702	MAP3K13	155.048	-1.46162	0.00349994	BosBovB	+	6	TRUE	FALSE	TRUE	FALSE
ctg1-81927776-81928374	89.0595	94.1115	82.7927	11.3188	0.000473624	0.0303043	EHHADH	226.193	-3.58139	2.36e-05	BosL1A5	-	3	TRUE	FALSE	TRUE	FALSE
ctg1-91453248-91454787	73.3221	68.3121	79.8782	-11.5661	0.00147414	0.0450387	NAALADL2	145.544	-3.44397	0.00012676	BosL1B	-	3	TRUE	FALSE	TRUE	FALSE
ctg1-91967161-91967513	75.8082	82.4406	67.2712	15.1695	0.000200254	0.0236464	NAALADL2	145.544	-3.44397	0.00012676	BosL1B	+	3	TRUE	FALSE	TRUE	FALSE
ctg1-94507499-94508142	71.4034	77.582	63.799	13.783	4.62101e-05	0.017501	SPATA16	7.53213	-3.19986	0.0252035	BosBovB	+	4	TRUE	FALSE	TRUE	FALSE
ctg10-101786735-101786851	39.9694	28.9826	53.6504	-24.6678	5.74679e-06	0.0139836	LOC112448536	23.421	1.62944	0.00239719	BosBovB	-	7	TRUE	TRUE	FALSE	FALSE
ctg10-101786954-101787010	21.303	9.19688	36.2558	-27.0589	9.90217e-05	0.0201357	LOC112448536	23.421	1.62944	0.00239719	BosBovB	+	5	TRUE	TRUE	FALSE	FALSE
ctg10-101791305-101791780	75.729	81.5563	68.5569	12.9993	0.000858483	0.0368467	LOC112448536	23.421	1.62944	0.00239719	BosBovB	+	5	TRUE	TRUE	FALSE	FALSE
ctg10-15514418-15514718	86.0937	90.9458	80.1218	10.824	0.00038477	0.028234	CORO2B	14.1916	-4.21417	0.00011297	BosL1A3	-	3	TRUE	FALSE	TRUE	FALSE
ctg10-26630262-26631000	90.9971	97.2875	83.2551	14.0324	5.99431e-05	0.0184022	RNASE10	430.037	1.75823	0.018315	BosBovB	+	3	TRUE	TRUE	FALSE	FALSE
ctg10-28812198-28812259	91.3327	97.4707	83.8769	13.5937	0.000567478	0.032187	RYR3	49.5664	-3.59811	2.31e-05	BosBovB	-	5	TRUE	FALSE	TRUE	FALSE
ctg10-36411835-36412038	58.9328	68.4894	47.1708	21.3186	0.00149782	0.0450387	RHOV	14.3945	-1.68621	0.00764943	BosL1B	+	5	TRUE	FALSE	TRUE	FALSE
ctg10-60103372-60104263	82.6763	87.5586	76.6123	10.9463	0.000858483	0.0368467	ATP8B4	683.331	1.28229	0.00702541	BosBovB	+	6	TRUE	FALSE	TRUE	FALSE
ctg10-65583754-65584396	82.9303	89.5337	74.8031	14.7307	5.74679e-06	0.0139836	FERMT2	112.454	-3.70684	5.4e-05	BosL1B	+	5	TRUE	FALSE	TRUE	FALSE
ctg10-733458-733517	83.2599	91.1891	73.501	17.6881	3.52765e-05	0.0168683	MCC	58.906	-3.75885	2.39e-05	BosBovB	+	4	TRUE	FALSE	TRUE	FALSE
ctg10-73721847-73722078	93.4747	98.3514	87.0679	11.2835	0.000130765	0.0218116	LOC112448510	4.79225	2.30024	0.0240678	BosL1B	-	3	TRUE	TRUE	FALSE	FALSE
ctg10-74082437-74082578	84.6288	89.3607	78.9936	10.3671	0.000311152	0.0262875	SYT16	22.8171	1.52369	0.0457713	BosL1B	-	3	TRUE	FALSE	TRUE	FALSE
ctg10-8023427-8023532	42.6694	50.4914	33.2323	17.2591	0.000250236	0.0249233	F2RL1	181.33	-2.59806	0.000132023	BosBovB	-	5	TRUE	FALSE	TRUE	FALSE
ctg10-85041505-85041852	72.1029	82.8185	59.3175	23.501	0.00038477	0.028234	LOC512541	4.00052	-2.74659	0.0309285	BosBovB	+	11	TRUE	TRUE	FALSE	FALSE
ctg11-14220179-14220724	89.1886	96.8213	79.7946	17.0266	0.000793191	0.0368467	XDH	16603.9	-1.49286	0.0269182	BosBovB	+	5	TRUE	FALSE	TRUE	FALSE
ctg11-15802642-15803284	85.086	92.7992	75.7962	17.003	0.000580014	0.032187	LTBP1	87.4741	-2.85789	8.72e-05	BosL1B	-	4	TRUE	FALSE	TRUE	FALSE
ctg11-1775803-1775949	80.5297	91.5578	66.9567	24.6011	9.90217e-05	0.0201357	MALL	129.724	-3.01363	0.000155717	BosL1A3	-	4	TRUE	FALSE	TRUE	FALSE
ctg11-1775822-1776035	80.5297	91.5578	66.9567	24.6011	9.90217e-05	0.0201357	MALL	129.724	-3.01363	0.000155717	BosL1B	-	4	TRUE	FALSE	TRUE	FALSE
ctg11-25474481-25475136	60.1383	51.8094	70.4517	-18.6423	0.000858483	0.0368467	LOC112448767	11.7202	2.44046	0.00236092	BosL1B	-	5	TRUE	TRUE	FALSE	FALSE
ctg11-55415421-55416118	63.5075	57.3283	71.5425	-14.2142	9.90217e-05	0.0201357	CTNNA2	7.94382	-4.24187	0.000437829	BosL1B	-	8	TRUE	FALSE	TRUE	FALSE
ctg11-55903314-55903710	54.8265	60.6376	47.2316	13.406	0.000707298	0.0344551	CTNNA2	7.94382	-4.24187	0.000437829	BosBovB	+	3	TRUE	FALSE	TRUE	FALSE
ctg11-5834963-5835505	78.3681	84.6433	70.6658	13.9775	0.000250236	0.0249233	NPAS2	36.136	-1.91975	0.0163505	BosBovB	-	5	TRUE	FALSE	TRUE	FALSE
ctg11-6027860-6028020	79.1494	84.9125	72.0564	12.8561	0.000580014	0.032187	TBC1D8	464.155	1.01886	0.0109539	BosBovB	-	3	TRUE	FALSE	TRUE	FALSE
ctg11-6083124-6083569	45.6247	31.457	64.05	-32.593	7.73607e-05	0.0192534	TBC1D8	464.155	1.01886	0.0109539	BosBovB	-	4	TRUE	FALSE	TRUE	FALSE
ctg11-6451985-6452352	46.2117	38.9588	55.2638	-16.305	0.00038477	0.028234	LOC107132901	83.7812	3.20724	0.000355534	BosL1B	+	6	TRUE	FALSE	TRUE	FALSE
ctg11-68685873-68685992	75.0793	68.6469	82.9962	-14.3493	0.000858483	0.0368467	EHD3	194.336	1.82923	0.0139778	BosBovB	+	3	TRUE	FALSE	TRUE	FALSE
ctg11-7183044-7183431	17.6793	5.00462	33.486	-28.4814	0.000473624	0.0303043	IL18R1	306.673	1.43746	0.000687875	BosL1B	+	11	TRUE	FALSE	TRUE	FALSE
ctg11-9572691-9574487	83.9314	90.476	76.0122	14.4638	0.000580014	0.032187	TACR1	10.4001	-4.30364	0.00170264	BosL1B	+	5	TRUE	FALSE	TRUE	FALSE
ctg12-10645037-10645650	7.34095	1.06105	15.2245	-14.1635	0.000250291	0.0249233	OLFM4	206.844	2.64538	0.00152023	BosL1B	+	5	TRUE	FALSE	TRUE	FALSE
ctg12-19196624-19196887	79.4271	89.8438	65.5751	24.2688	0.000858483	0.0368467	ARL11	394.957	1.37933	0.000819233	BosL1A8	+	5	TRUE	FALSE	TRUE	FALSE
ctg12-33422397-33422582	79.8815	85.2492	73.201	12.0483	0.00103778	0.0393834	ATP8A2	18.8794	-1.04055	0.0464068	BosL1A6	+	4	TRUE	FALSE	TRUE	FALSE
ctg12-39853792-39854409	81.4417	86.6309	74.8995	11.7314	0.000250236	0.0249233	PCDH9	21.4764	-1.52246	0.0129503	BosBovB	-	5	TRUE	FALSE	TRUE	FALSE
ctg12-39871242-39871383	84.7255	89.3154	78.4888	10.8266	0.00149782	0.0450387	PCDH9	21.4764	-1.52246	0.0129503	BosBovB	-	3	TRUE	FALSE	TRUE	FALSE
ctg12-40155447-40155887	79.3777	87.7056	70.3983	17.3073	0.000473624	0.0303043	PCDH9	21.4764	-1.52246	0.0129503	BosL1A8	+	6	TRUE	FALSE	TRUE	FALSE
ctg12-40458673-40459198	86.5504	92.0844	79.9207	12.1638	0.00015926	0.0223249	PCDH9	21.4764	-1.52246	0.0129503	BosL1A3	+	9	TRUE	FALSE	TRUE	FALSE
ctg12-40459880-40460458	48.0704	39.2907	58.533	-19.2423	7.73607e-05	0.0192534	PCDH9	21.4764	-1.52246	0.0129503	BosBovB	+	7	TRUE	FALSE	TRUE	FALSE
ctg12-40553996-40554601	87.176	93.5205	79.5256	13.9948	0.000858483	0.0368467	PCDH9	21.4764	-1.52246	0.0129503	BosBovB	+	3	TRUE	FALSE	TRUE	FALSE
ctg12-46256772-46257352	85.8398	90.7132	80.0728	10.6404	0.00149782	0.0450387	DACH1	45.0978	1.98258	0.0104091	BosBovB	+	4	TRUE	FALSE	TRUE	FALSE
ctg12-5139286-5139683	80.6177	85.8625	74.0897	11.7728	0.000858483	0.0368467	PCDH17	49.1788	-2.54846	3.78e-05	BosBovB	-	3	TRUE	FALSE	TRUE	FALSE
ctg12-71012167-71012631	67.2161	74.3534	59.2471	15.1063	0.00038477	0.028234	LOC100337053	86.0211	2.06446	0.00952607	BosBovB	-	5	TRUE	FALSE	TRUE	FALSE
ctg13-12997149-12997574	88.6742	94.2555	81.5926	12.6628	0.00038477	0.028234	CELF2	143.871	1.19296	6.07e-05	BosBovB	+	4	TRUE	FALSE	TRUE	FALSE
ctg13-13092439-13092542	22.4228	9.65859	38.1327	-28.4741	0.00038477	0.028234	CELF2	143.871	1.19296	6.07e-05	BosBovB	-	4	TRUE	FALSE	TRUE	FALSE
ctg13-17325935-17326265	20.9153	5.98653	40.0089	-34.0223	0.00078728	0.0368467	PFKFB3	6855.78	1.02854	0.0417902	BosL1B	+	3	TRUE	FALSE	TRUE	FALSE
ctg13-25401952-25402406	61.6241	54.8656	69.9423	-15.0767	0.00149782	0.0450387	KIAA1217	203.586	-3.32301	6.49e-06	BosL1B	+	3	TRUE	FALSE	TRUE	FALSE
ctg13-29255092-29256336	83.6664	88.1617	78.1389	10.0228	0.000580014	0.032187	FAM107B	1496.09	1.14306	0.00201972	BosBovB	-	8	TRUE	FALSE	TRUE	FALSE
ctg13-313272-315150	35.9752	42.0841	28.5664	13.5178	0.00178879	0.0484939	LOC784898	112.493	-2.68491	0.000117943	BosL1A2	+	4	TRUE	FALSE	TRUE	FALSE
ctg13-33924193-33924305	91.8429	97.5625	84.6335	12.929	0.000641708	0.0344551	LOC104973760	223.624	1.54465	0.00109196	BosBovB	+	6	TRUE	TRUE	FALSE	FALSE
ctg13-47139729-47139910	86.1685	96.9685	73.1597	23.8087	0.000241392	0.0249233	RASSF2	3351.02	1.41062	0.000318875	BosL1B	+	3	TRUE	FALSE	TRUE	FALSE
ctg13-58561882-58562056	75.9745	80.913	70.0115	10.9015	0.000126017	0.0210476	ZBP1	262.806	1.14153	0.000202618	BosBovB	-	8	TRUE	FALSE	FALSE	TRUE
ctg13-65309937-65310181	90.6324	96.4732	83.3314	13.1418	0.000989722	0.0393834	EPB41L1	129.285	-2.77647	0.000100719	BosL1B	-	7	TRUE	FALSE	TRUE	FALSE
ctg13-76217482-76218031	82.7079	88.8717	75.2182	13.6535	0.000250236	0.0249233	SULF2	479.577	-1.33378	0.0335769	BosL1B	+	16	TRUE	FALSE	TRUE	FALSE
ctg13-76966914-76967203	63.2621	58.1669	69.5331	-11.3662	0.00124915	0.0422702	LOC112449342	114.463	2.62265	0.000968305	BosL1B	+	5	TRUE	TRUE	FALSE	FALSE
ctg13-78401735-78401791	89.0125	97.4258	78.6577	18.7681	6.93517e-05	0.0192534	LOC112449349	162.2	2.45833	0.00033992	BosBovB	+	4	TRUE	TRUE	FALSE	FALSE
ctg13-81440307-81440477	79.3593	87.8246	68.9404	18.8842	0.000229514	0.0249233	BCAS1	15.0732	-5.36731	8.75e-06	BosBovB	+	8	TRUE	FALSE	TRUE	FALSE
ctg14-23139674-23140218	58.5589	53.5422	65.0557	-11.5135	9.90217e-05	0.0201357	LYN	5193.71	1.42472	0.00388835	BosBovB	-	8	TRUE	FALSE	TRUE	FALSE
ctg14-23140852-23141198	74.5007	69.9056	80.1562	-10.2505	0.000707298	0.0344551	LYN	5193.71	1.42472	0.00388835	BosL1B	-	5	TRUE	FALSE	TRUE	FALSE
ctg14-26010685-26011838	63.0014	68.415	56.3385	12.0765	0.000311152	0.0262875	CA8	150.311	-3.18195	0.000258076	BosL1B	+	10	TRUE	FALSE	TRUE	FALSE
ctg14-60614940-60615664	86.4141	93.621	77.6999	15.9211	0.000311152	0.0262875	RIMS2	7.89029	-3.60774	0.00167929	BosL1B	-	3	TRUE	FALSE	TRUE	FALSE
ctg14-60783584-60783934	66.5562	79.4794	50.7601	28.7193	2.67594e-05	0.0161846	RIMS2	7.89029	-3.60774	0.00167929	BosBovB	-	7	TRUE	FALSE	TRUE	FALSE
ctg14-64951951-64952835	56.5079	45.1198	70.5927	-25.4729	0.000126017	0.0210476	VPS13B	4891.47	1.33217	3.38e-05	BosBovB	-	5	TRUE	FALSE	TRUE	FALSE
ctg14-790633-792442	80.1263	84.8057	74.5439	10.2618	0.000311152	0.0262875	SPATC1	2.47356	-2.47178	0.0375332	BosL1B	+	4	TRUE	FALSE	TRUE	FALSE
ctg14-82048958-82049908	84.2392	90.3146	76.7596	13.555	0.00103778	0.0393834	SNTB1	590.241	-1.97694	0.00375417	BosBovB	+	4	TRUE	FALSE	TRUE	FALSE
ctg15-14152968-14153441	85.6737	93.9022	75.7352	18.167	0.000311152	0.0262875	MAML2	2473.18	1.77288	0.000218498	BosBovB	+	5	TRUE	TRUE	FALSE	FALSE
ctg15-28658303-28658877	84.0942	90.9576	75.691	15.2665	0.00126597	0.0424657	IL10RA	1360.76	1.23507	0.000932703	BosBovB	-	3	TRUE	FALSE	FALSE	TRUE
ctg15-31194850-31195981	85.4001	91.5229	77.9175	13.6054	3.53649e-07	0.0111046	GRIK4	4.30319	-3.63135	0.0247922	BosBovB	+	4	TRUE	FALSE	TRUE	FALSE
ctg15-43093993-43094485	58.9666	50.3694	70.0704	-19.701	0.00038477	0.028234	LOC112441628	8.67114	-1.85974	0.0103223	BosBovB	-	10	TRUE	FALSE	TRUE	FALSE
ctg15-43397183-43397694	90.8789	97.2173	83.4141	13.8033	0.00055658	0.032187	DENND5A	4640.1	1.39773	0.000470104	BosBovB	+	7	TRUE	FALSE	TRUE	FALSE
ctg15-51795640-51796292	57.5316	50.9154	65.5432	-14.6277	9.90217e-05	0.0201357	FOLR1	75.5257	-9.69626	1.28e-07	BosBovB	-	9	TRUE	FALSE	TRUE	FALSE
ctg15-65197013-65197288	76.3462	91.4743	57.9615	33.5128	0.00092863	0.0393834	EHF	2357.8	-3.75051	1.3e-05	BosL1B	-	4	TRUE	FALSE	TRUE	FALSE
ctg15-65217401-65217737	88.4523	93.4188	82.3397	11.079	0.00103778	0.0393834	EHF	2357.8	-3.75051	1.3e-05	BosL1B	-	3	TRUE	FALSE	TRUE	FALSE
ctg15-70567815-70568982	67.406	73.738	59.0401	14.6979	0.000580014	0.032187	LRRC4C	7.04824	-2.47005	0.016537	BosBovB	+	3	TRUE	FALSE	TRUE	FALSE
ctg15-71550763-71551204	58.6633	64.923	51.3465	13.5765	0.00103778	0.0393834	LRRC4C	7.04824	-2.47005	0.016537	BosBovB	+	3	TRUE	FALSE	TRUE	FALSE
ctg15-71786143-71788333	80.5617	85.9987	73.8135	12.1853	0.00015926	0.0223249	LRRC4C	7.04824	-2.47005	0.016537	BosBovB	-	16	TRUE	FALSE	TRUE	FALSE
ctg15-75962167-75962347	88.412	94.2613	81.2202	13.0412	0.00146817	0.0450387	PHF21A	691.231	1.22643	0.000332487	BosBovB	+	9	TRUE	FALSE	TRUE	FALSE
ctg15-76033694-76034407	68.4572	76.1888	59.021	17.1677	0.000858483	0.0368467	PHF21A	691.231	1.22643	0.000332487	BosL1B	+	6	TRUE	FALSE	TRUE	FALSE
ctg15-77733589-77733759	77.7353	90.0844	62.5365	27.5478	0.000580014	0.032187	PTPRJ	11878	1.74718	0.00032785	BosL1B	-	4	TRUE	FALSE	TRUE	FALSE
ctg15-7881667-7882297	81.7626	88.9198	72.1157	16.8041	0.000272385	0.0262875	PGR	34.6273	-5.54259	2.78e-07	BosBovB	+	7	TRUE	FALSE	TRUE	FALSE
ctg15-80752199-80752401	86.7347	93.5084	78.5255	14.9829	0.000135813	0.0223249	SLC43A1	62.9915	-3.16639	0.000449254	BosBovB	-	6	TRUE	FALSE	TRUE	FALSE
ctg15-83553798-83554521	77.726	87.9962	64.8357	23.1605	3.53649e-07	0.0111046	LOC613282	3.05334	-6.49326	0.00139014	BosBovB	+	12	TRUE	FALSE	FALSE	TRUE
ctg16-1438977-1439762	89.5876	95.7411	82.4922	13.2489	0.000200254	0.0236464	ATP2B4	1716.6	-1.46121	5.52e-05	BosBovB	-	9	TRUE	FALSE	TRUE	FALSE
ctg16-19704833-19705559	73.815	81.2514	64.9185	16.3329	5.9973e-05	0.0184022	USH2A	3.84444	-3.10458	0.022125	BosBovB	+	6	TRUE	FALSE	TRUE	FALSE
ctg16-26821128-26821298	48.4457	39.9769	58.3163	-18.3394	2.67594e-05	0.0161846	SUSD4	4.00455	-2.75737	0.00473351	BosBovB	-	10	TRUE	FALSE	FALSE	TRUE
ctg16-28562546-28565021	73.8414	69.3255	79.4012	-10.0757	0.000296533	0.0262875	ENAH	191.138	-1.9456	0.000189489	BosBovB	+	11	TRUE	FALSE	TRUE	FALSE
ctg16-28611473-28612243	89.1366	93.9961	83.1558	10.8403	0.00103778	0.0393834	ENAH	191.138	-1.9456	0.000189489	BosBovB	-	4	TRUE	FALSE	TRUE	FALSE
ctg16-35185602-35186671	66.3195	60.6517	73.724	-13.0723	3.52765e-05	0.0168683	KMO	562.736	3.329	7.17e-05	BosL1B	+	11	TRUE	FALSE	TRUE	FALSE
ctg16-35202917-35203429	84.0375	89.5086	77.2823	12.2263	8.35422e-05	0.0201357	KMO	562.736	3.329	7.17e-05	BosBovB	+	4	TRUE	FALSE	TRUE	FALSE
ctg16-38248212-38249874	83.0452	88.6921	76.0497	12.6424	0.00149782	0.0450387	PRRX1	3.06568	-2.47653	0.0354759	BosBovB	+	14	TRUE	FALSE	TRUE	FALSE
ctg16-41544594-41545283	25.4256	13.8782	38.6246	-24.7464	2.06295e-07	0.0111046	TNFRSF1B	5677.04	1.12084	0.00246805	BosL1B	-	5	TRUE	FALSE	TRUE	FALSE
ctg16-42870535-42870959	80.3825	91.4884	66.7137	24.7747	0.000311152	0.0262875	CASZ1	285.486	-2.37094	0.000338111	BosBovB	-	7	TRUE	FALSE	TRUE	FALSE
ctg16-52846321-52847276	80.8665	87.891	72.4562	15.4348	4.09643e-06	0.0139836	KAZN	17.4112	-1.6417	0.00055595	BosL1A6	+	9	TRUE	FALSE	TRUE	FALSE
ctg16-53440793-53440958	72.1241	82.9195	58.8375	24.082	9.90217e-05	0.0201357	KAZN	17.4112	-1.6417	0.00055595	BosBovB	+	4	TRUE	FALSE	TRUE	FALSE
ctg16-57751354-57752018	77.0015	83.2557	69.7023	13.5534	5.9973e-05	0.0184022	PAPPA2	5.85276	-2.03757	0.0466805	BosBovB	-	6	TRUE	FALSE	TRUE	FALSE
ctg16-59441754-59442363	74.3917	83.9542	62.6224	21.3317	5.9973e-05	0.0184022	LOC100299281	1536.67	-1.34918	0.000166422	BosBovB	-	6	TRUE	FALSE	TRUE	FALSE
ctg16-67905445-67905652	44.5085	33.6326	58.3345	-24.7019	0.000580014	0.032187	PLA2G4A	131.294	1.30595	0.00302051	BosL1B	+	3	TRUE	FALSE	FALSE	TRUE
ctg16-67905925-67906155	13.4501	2.05944	27.61	-25.5506	8.45622e-05	0.0201357	PLA2G4A	131.294	1.30595	0.00302051	BosL1B	+	3	TRUE	FALSE	FALSE	TRUE
ctg16-73616883-73617174	87.4727	94.9688	78.2468	16.722	0.000707298	0.0344551	HSD11B1	125.889	3.94246	2.01e-05	BosL1B	-	6	TRUE	FALSE	TRUE	FALSE
ctg16-75697589-75698334	86.3357	94.6346	76.5892	18.0454	0.00149782	0.0450387	LOC518224	2.37276	-3.15433	0.0204608	BosL1B	+	5	TRUE	FALSE	TRUE	FALSE
ctg16-79788493-79788578	78.3356	88.3281	66.0372	22.2909	0.000858483	0.0368467	PKP1	84.2915	-2.4837	0.00155618	BosBovB	-	3	TRUE	FALSE	TRUE	FALSE
ctg17-12824398-12825025	87.1375	92.8475	80.1682	12.6793	0.00124915	0.0422702	SMAD1	87.0319	-2.26367	0.000543109	BosBovB	-	8	TRUE	FALSE	FALSE	TRUE
ctg17-47310108-47310717	67.9412	75.1818	60.9326	14.2491	7.73607e-05	0.0192534	TMEM132D	2.05844	-5.59437	0.00413346	BosBovB	+	5	TRUE	FALSE	TRUE	FALSE
ctg17-47875840-47877098	63.9018	69.2766	56.9285	12.348	0.000250236	0.0249233	TMEM132D	2.05844	-5.59437	0.00413346	BosL1A3	+	4	TRUE	FALSE	TRUE	FALSE
ctg17-47895471-47895751	63.5221	72.1566	52.3949	19.7617	0.00149782	0.0450387	TMEM132D	2.05844	-5.59437	0.00413346	BosL1B	-	3	TRUE	FALSE	TRUE	FALSE
ctg17-52005874-52006628	52.1298	37.69	68.791	-31.101	0.00103778	0.0393834	TCTN2	32.0655	-1.23917	0.00148908	BosBovB	-	3	TRUE	FALSE	TRUE	FALSE
ctg17-52023345-52023867	58.3647	51.7806	66.3873	-14.6067	8.01604e-06	0.0139836	TCTN2	32.0655	-1.23917	0.00148908	BosL1B	+	13	TRUE	FALSE	TRUE	FALSE
ctg17-53537809-53538245	81.7891	93.7625	66.7529	27.0096	0.000250236	0.0249233	TMEM120B	829.234	-3.34104	7.39e-05	BosBovB	+	4	TRUE	FALSE	TRUE	FALSE
ctg17-55811206-55811880	79.4563	85.0162	72.7077	12.3086	0.000793191	0.0368467	TMEM233	28.9592	-5.98675	1.03e-05	BosL1B	+	5	TRUE	FALSE	TRUE	FALSE
ctg17-61465650-61466645	71.2768	77.1301	64.348	12.7821	0.000858483	0.0368467	RPH3A	24.3525	3.06698	0.000454283	BosBovB	-	7	TRUE	FALSE	TRUE	FALSE
ctg17-61491380-61492111	80.403	86.7007	72.794	13.9067	1.09926e-05	0.0145334	RPH3A	24.3525	3.06698	0.000454283	BosBovB	-	9	TRUE	FALSE	TRUE	FALSE
ctg17-67433156-67434025	69.0897	64.3604	74.9103	-10.5498	0.000250236	0.0249233	TTC28	30.4554	-2.06393	5.83e-05	BosL1B	+	3	TRUE	FALSE	TRUE	FALSE
ctg17-67576783-67577118	79.4015	89.2122	67.1551	22.057	0.00038477	0.028234	TTC28	30.4554	-2.06393	5.83e-05	BosBovB	+	4	TRUE	FALSE	TRUE	FALSE
ctg17-71721814-71721848	52.1293	63.4646	38.1782	25.2864	0.00149782	0.0450387	BCR	113.714	-1.76115	0.000617731	BosBovB	+	3	TRUE	FALSE	TRUE	FALSE
ctg17-72482244-72482319	91.2989	95.8958	85.641	10.2548	0.000672149	0.0344551	KLHL22	441.074	1.45501	0.0238794	BosBovB	-	3	TRUE	FALSE	FALSE	TRUE
ctg18-10681024-10681272	79.4138	87.5885	69.3526	18.236	0.00149782	0.0450387	ATP2C2	334.854	-5.33093	1.61e-07	BosL1B	-	3	TRUE	FALSE	TRUE	FALSE
ctg18-14050838-14050904	85.8429	95.3906	73.4843	21.9063	0.00108524	0.0407167	CBFA2T3	150.453	1.05054	0.00974015	BosBovB	-	3	TRUE	TRUE	FALSE	FALSE
ctg18-14378315-14378810	79.5566	84.434	73.7146	10.7194	0.00038477	0.028234	ANKRD11	5006.81	1.4797	2.58e-05	BosBovB	-	5	TRUE	TRUE	TRUE	FALSE
ctg18-16657777-16658247	68.0023	77.9002	56.1462	21.7541	3.52765e-05	0.0168683	ABCC11	9.59537	-2.37484	0.0371164	BosBovB	+	7	TRUE	FALSE	TRUE	FALSE
ctg18-25071113-25071569	91.1213	95.9595	85.3795	10.58	0.000161763	0.0226505	NLRC5	2434.4	1.73624	3.68e-06	BosL1B	+	3	TRUE	FALSE	TRUE	FALSE
ctg18-36079585-36079660	83.8063	94.7646	70.3192	24.4454	0.000210536	0.0245301	CDH1	572.325	-2.44841	1.15e-05	BosBovB	-	3	TRUE	FALSE	TRUE	FALSE
ctg18-48086544-48089577	85.4425	90.3343	79.583	10.7513	0.00149782	0.0450387	SPINT2	554.682	-2.04804	0.00172642	BosBovB	-	14	TRUE	FALSE	TRUE	FALSE
ctg18-48100703-48101178	84.8875	92.1656	75.9298	16.2358	0.00038477	0.028234	SPINT2	554.682	-2.04804	0.00172642	BosBovB	-	4	TRUE	FALSE	TRUE	FALSE
ctg18-51409491-51410090	48.3302	42.5079	55.7642	-13.2563	0.000858483	0.0368467	LOC112442324	10.6172	1.46856	0.0322587	BosBovB	-	4	TRUE	FALSE	FALSE	TRUE
ctg18-5165758-5165892	38.6287	44.4781	31.4293	13.0488	0.000200254	0.0236464	VAT1L	323.431	2.9613	0.00095197	BosBovB	+	8	TRUE	FALSE	TRUE	FALSE
ctg18-52269817-52269877	31.9153	39.0293	23.4021	15.6272	0.000126017	0.0210476	ZNF112	13.9397	-3.05413	0.00287572	BosBovB	+	3	TRUE	FALSE	TRUE	FALSE
ctg18-54343792-54343991	80.1166	84.6859	74.4928	10.1931	0.000580014	0.032187	DHX34	597.603	1.12388	0.00935558	BosBovB	+	8	TRUE	FALSE	TRUE	FALSE
ctg18-60851392-60852360	87.8962	94.3506	81.158	13.1926	0.0017067	0.0484939	MGC139164	880.858	1.33658	0.0445105	BosL1A8	+	6	TRUE	TRUE	FALSE	FALSE
ctg18-60996739-60999005	89.4178	93.9885	83.7283	10.2602	0.000311152	0.0262875	MGC157082	632.084	2.90038	2.28e-05	BosBovB	-	13	TRUE	FALSE	FALSE	TRUE
ctg18-61069358-61070939	73.4916	79.093	67.0779	12.0151	4.62101e-05	0.017501	LOC104968422	1715.08	3.19716	6.61e-06	BosL1A3	+	31	TRUE	FALSE	TRUE	FALSE
ctg18-61072976-61076252	75.5657	80.84	68.9708	11.8692	3.52765e-05	0.0168683	LOC104968422	1715.08	3.19716	6.61e-06	BosL1A3	+	18	TRUE	FALSE	TRUE	FALSE
ctg18-61089069-61089880	77.0032	83.039	70.0446	12.9944	0.000200254	0.0236464	LOC104968422	1715.08	3.19716	6.61e-06	BosL1B	+	10	TRUE	FALSE	TRUE	FALSE
ctg18-62324704-62325245	81.0384	87.0203	73.676	13.3444	0.000858483	0.0368467	EPS8L1	99.0864	-3.52255	1.36e-05	BosBovB	-	4	TRUE	FALSE	FALSE	TRUE
ctg18-62427840-62430360	59.6349	68.4948	48.8672	19.6276	5.74679e-06	0.0139836	NLRP2	39.7745	2.25561	0.00826608	BosL1A3	+	5	TRUE	FALSE	TRUE	FALSE
ctg18-62436277-62436546	78.0799	88.1815	66.3958	21.7857	0.000455786	0.0303043	NLRP2	39.7745	2.25561	0.00826608	BosL1B	+	3	TRUE	FALSE	TRUE	FALSE
ctg18-62440120-62441099	58.9354	66.8764	50.5005	16.3758	0.00038477	0.028234	NLRP2	39.7745	2.25561	0.00826608	BosBovB	-	6	TRUE	FALSE	FALSE	TRUE
ctg18-62519270-62519404	88.7985	94.6385	81.6949	12.9436	0.000348606	0.028234	NCR1	85.9481	2.04498	0.00877578	BosL1B	-	3	TRUE	TRUE	FALSE	FALSE
ctg18-62519401-62520591	79.0061	89.6644	65.5926	24.0717	0.000200254	0.0236464	NCR1	85.9481	2.04498	0.00877578	BosL1A6	-	5	TRUE	TRUE	FALSE	FALSE
ctg19-13640033-13640524	88.4791	94.8641	80.8346	14.0295	0.000473624	0.0303043	ACACA	1974.98	-2.5045	0.000417678	BosBovB	+	5	TRUE	TRUE	FALSE	FALSE
ctg19-17393260-17393339	19.8159	7.82875	35.3821	-27.5533	0.000656807	0.0344551	MYO1D	395.892	-1.42873	0.000443903	BosBovB	-	5	TRUE	FALSE	TRUE	FALSE
ctg19-18658689-18659150	75.1489	69.7244	81.7139	-11.9896	0.00149782	0.0450387	NF1	377.675	1.03953	0.000294165	BosBovB	+	8	TRUE	FALSE	TRUE	FALSE
ctg19-28403089-28403832	87.2037	93.9589	78.8897	15.0691	0.00103778	0.0393834	PIK3R5	2502.21	2.16047	5.22e-06	BosL1B	-	6	TRUE	TRUE	FALSE	FALSE
ctg19-40105540-40105625	74.537	93.0302	51.2566	41.7736	8.45937e-05	0.0201357	GRB7	61.6269	-3.11788	1.7e-05	BosBovB	+	3	TRUE	FALSE	TRUE	FALSE
ctg19-48573148-48573519	70.6688	65.6859	77.3236	-11.6377	9.90217e-05	0.0201357	PECAM1	149.672	1.19737	0.0457106	BosL1B	+	4	TRUE	FALSE	TRUE	FALSE
ctg19-50792580-50792691	78.0223	85.8636	68.4204	17.4432	0.00124915	0.0422702	FASN	30565.6	-4.57587	5.6e-07	BosBovB	-	7	TRUE	FALSE	TRUE	FALSE
ctg19-53788713-53789029	90.4024	96.1698	83.6687	12.5011	0.00124915	0.0422702	PGS1	972.326	1.6141	0.000111912	BosL1B	+	9	TRUE	TRUE	FALSE	FALSE
ctg19-61371339-61371870	51.7096	41.1328	64.2716	-23.1388	0.00015926	0.0223249	ABCA10	339.774	1.28049	0.0176168	BosL1B	-	8	TRUE	FALSE	TRUE	FALSE
ctg19-61460932-61461116	90.2793	97.2083	81.4556	15.7528	0.000618251	0.0342283	ABCA6	1148.93	1.86946	0.00207268	BosL1B	-	6	TRUE	FALSE	TRUE	FALSE
ctg19-61834028-61834360	38.3772	29.4994	49.2075	-19.7081	0.000580014	0.032187	ARSG	497.616	1.94312	0.000402318	BosL1B	-	10	TRUE	FALSE	TRUE	FALSE
ctg19-63263276-63264183	77.9766	73.2279	83.819	-10.5911	0.00015926	0.0223249	HELZ	2498.26	1.04156	0.000430798	BosBovB	-	9	TRUE	FALSE	TRUE	FALSE
ctg2-114934921-114935324	75.9231	82.3456	68.1596	14.186	0.000450363	0.0303043	IRS1	429.749	-2.87268	0.000156797	BosBovB	+	4	TRUE	FALSE	TRUE	FALSE
ctg2-117123320-117124084	65.1028	72.4855	55.6178	16.8678	0.000250236	0.0249233	PID1	81.566	1.32527	0.0201498	BosL1A6	-	5	TRUE	FALSE	TRUE	FALSE
ctg2-118823003-118823045	76.3985	89.4539	61.0218	28.4321	0.000580014	0.032187	SPATA3	5.50638	-7.21501	2.05e-05	BosBovB	-	3	TRUE	FALSE	TRUE	FALSE
ctg2-119072484-119072591	82.1678	94.8448	66.5654	28.2794	0.0009165	0.0392742	ARMC9	23.5322	-1.4749	0.00197417	BosBovB	-	3	TRUE	FALSE	TRUE	FALSE
ctg2-135291756-135292414	62.6744	55.1251	72.0295	-16.9044	2.67594e-05	0.0161846	PADI4	236.965	2.01116	0.00372433	BosL1A6	-	27	TRUE	FALSE	FALSE	TRUE
ctg2-17608137-17608378	80.2923	93.4231	64.2359	29.1872	1.09926e-05	0.0145334	LOC112442544	2.16668	-3.82543	0.0227193	BosBovB	+	9	TRUE	FALSE	TRUE	FALSE
ctg2-31511837-31512479	81.3971	74.674	89.6718	-14.9978	0.000311152	0.0262875	COBLL1	791.311	-3.36623	0.000121846	BosBovB	+	3	TRUE	FALSE	TRUE	FALSE
ctg2-53315271-53315829	92.0522	97.0582	85.7585	11.2996	0.000768568	0.0368467	ARHGAP15	560.761	1.1629	0.0110142	BosBovB	-	3	TRUE	FALSE	TRUE	FALSE
ctg2-53315834-53316006	89.1722	96.6745	80.2058	16.4687	0.000412587	0.0301142	ARHGAP15	560.761	1.1629	0.0110142	BosBovB	+	4	TRUE	FALSE	TRUE	FALSE
ctg2-53839067-53840033	84.6519	93.0687	74.6308	18.438	0.00149782	0.0450387	KYNU	149.588	1.06367	0.0275013	BosBovB	+	3	TRUE	FALSE	TRUE	FALSE
ctg2-62353323-62354194	77.5279	82.5065	71.4877	11.0188	0.00124915	0.0422702	CCNT2	973.015	1.03433	0.00160465	BosL1A4	+	5	TRUE	FALSE	FALSE	TRUE
ctg2-63935462-63935716	82.4801	93.0174	69.8205	23.1968	9.90217e-05	0.0201357	NCKAP5	9.97796	-4.78635	0.000244611	BosBovB	-	3	TRUE	FALSE	TRUE	FALSE
ctg2-85984934-85985137	90.5546	95.3144	84.5738	10.7406	0.000126017	0.0210476	SF3B1	10535.1	1.14361	0.00209181	BosBovB	+	10	TRUE	FALSE	FALSE	TRUE
ctg2-89156303-89156871	67.9134	59.8694	77.5339	-17.6645	2.00696e-05	0.0154155	AOX1	42.1381	-3.02402	0.0012536	BosBovB	-	6	TRUE	FALSE	TRUE	FALSE
ctg2-92074071-92074369	53.6014	43.9838	64.9846	-21.0008	0.00178879	0.0484939	CTLA4	55.967	1.16506	0.0495435	BosL1B	+	3	TRUE	FALSE	TRUE	FALSE
ctg2-96441373-96441459	86.581	94.8664	76.3837	18.4828	0.000123526	0.0210476	C2H2orf80	83.1903	-8.57336	1.28e-07	BosBovB	-	4	TRUE	FALSE	TRUE	FALSE
ctg20-10254632-10254899	77.5187	87.8615	65.8861	21.9754	0.00038477	0.028234	OCLN	232.262	-3.53302	1.31e-05	BosL1B	+	6	TRUE	FALSE	TRUE	FALSE
ctg20-23336420-23336463	37.8048	26.1978	52.456	-26.2582	0.000858483	0.0368467	IL31RA	17.6559	-4.23467	0.000141961	BosBovB	-	3	TRUE	FALSE	TRUE	FALSE
ctg20-28457388-28457446	62.2353	56.2547	69.5962	-13.3415	0.000200254	0.0236464	PARP8	1198.55	1.04609	0.000421817	BosBovB	+	4	TRUE	FALSE	TRUE	FALSE
ctg20-31374015-31374544	78.6266	87.4105	68.4808	18.9297	5.9973e-05	0.0184022	CCL28	33.218	-3.45599	0.00115761	BosBovB	-	4	TRUE	FALSE	TRUE	FALSE
ctg20-36014707-36015226	71.0173	80.4998	60.1974	20.3024	0.000286255	0.0262875	EGFLAM	5.5144	-7.70893	0.000367435	BosBovB	-	3	TRUE	FALSE	TRUE	FALSE
ctg20-36286224-36286601	85.3914	90.0009	79.9179	10.083	0.000707298	0.0344551	EGFLAM	5.5144	-7.70893	0.000367435	BosBovB	+	4	TRUE	FALSE	TRUE	FALSE
ctg20-38919596-38920029	73.0214	80.0221	64.5	15.5221	0.000126017	0.0210476	PRLR	609.983	-2.97012	0.000233295	BosBovB	-	4	TRUE	FALSE	TRUE	FALSE
ctg20-38959027-38959855	77.9323	84.678	69.559	15.119	0.000473624	0.0303043	PRLR	609.983	-2.97012	0.000233295	BosBovB	-	8	TRUE	FALSE	TRUE	FALSE
ctg20-41517602-41517647	90.1484	96.474	82.3374	14.1366	0.000412181	0.0301142	PDZD2	63.7669	-2.45387	0.000104242	BosBovB	-	3	TRUE	FALSE	TRUE	FALSE
ctg20-56259623-56260018	64.2385	59.3291	70.125	-10.7959	0.000311152	0.0262875	MYO10	262.754	-1.84877	0.00111462	BosL1B	+	4	TRUE	FALSE	TRUE	FALSE
ctg20-56619713-56620158	77.4325	90.0802	61.9267	28.1535	0.000707298	0.0344551	RETREG1	847.356	-2.34374	0.00112675	BosBovB	+	9	TRUE	FALSE	TRUE	FALSE
ctg20-61481109-61481612	81.0496	86.0287	75.15	10.8787	0.000250236	0.0249233	CTNND2	3.76906	-3.98349	0.0024101	BosBovB	-	3	TRUE	FALSE	TRUE	FALSE
ctg20-62222733-62222868	63.0722	54.8452	73.0814	-18.2362	0.00178879	0.0484939	CTNND2	3.76906	-3.98349	0.0024101	BosBovB	+	6	TRUE	FALSE	TRUE	FALSE
ctg20-62267416-62267852	55.9443	51.4141	61.979	-10.5649	0.00178879	0.0484939	CTNND2	3.76906	-3.98349	0.0024101	BosBovB	-	4	TRUE	FALSE	TRUE	FALSE
ctg20-65808514-65809173	54.7516	60.6445	47.75	12.8945	0.00117239	0.0422702	ADCY2	4.3566	-3.3861	0.00418906	BosL1A3	-	3	TRUE	FALSE	TRUE	FALSE
ctg20-7802123-7802467	65.6937	75.1371	53.5514	21.5857	0.000473624	0.0303043	ARHGEF28	88.715	-3.07405	4.63e-08	BosBovB	+	6	TRUE	FALSE	TRUE	FALSE
ctg21-16587358-16587476	81.3177	92.4663	67.3434	25.123	9.90217e-05	0.0201357	KLHL25	31.4067	-1.3771	0.00454549	BosL1A6	+	7	TRUE	FALSE	TRUE	FALSE
ctg21-24251937-24252727	67.4299	75.4813	57.5205	17.9607	0.000210536	0.0245301	ADAMTSL3	3.87612	-3.21658	0.00169211	BosL1A6	+	3	TRUE	FALSE	TRUE	FALSE
ctg21-26424585-26424841	40.2345	32.126	50.2141	-18.0881	9.90217e-05	0.0201357	ARNT2	8.12594	-2.60514	0.00619417	BosL1B	+	3	TRUE	FALSE	TRUE	FALSE
ctg21-2858566-2859248	79.8743	85.379	73.0876	12.2915	7.73607e-05	0.0192534	ATP10A	65.0021	-2.60621	9.94e-05	BosL1A6	-	5	TRUE	FALSE	TRUE	FALSE
ctg21-35174850-35176051	89.6833	94.6157	83.4963	11.1193	0.000580014	0.032187	STXBP6	222.56	-1.33424	0.000748698	BosBovB	+	8	TRUE	FALSE	TRUE	FALSE
ctg21-35253472-35254043	69.963	64.3479	77.3415	-12.9935	5.9973e-05	0.0184022	STXBP6	222.56	-1.33424	0.000748698	BosBovB	+	3	TRUE	FALSE	TRUE	FALSE
ctg21-3877527-3879608	64.7189	70.9003	57.4581	13.4422	0.000580014	0.032187	GABRB3	4.0047	-7.56063	0.000132023	BosBovB	+	10	TRUE	FALSE	TRUE	FALSE
ctg21-3894847-3896506	71.3497	76.2734	65.1072	11.1663	0.000473624	0.0303043	GABRB3	4.0047	-7.56063	0.000132023	BosBovB	+	11	TRUE	FALSE	TRUE	FALSE
ctg21-60141969-60142094	12.0885	3.81771	22.2679	-18.4502	0.0017112	0.0484939	CLMN	1676.12	-4.92149	3.65e-07	BosL1B	+	3	TRUE	FALSE	TRUE	FALSE
ctg21-6359091-6359516	78.2914	83.6	71.7577	11.8423	0.000200254	0.0236464	ADAMTS17	12.6054	-1.82586	0.0264035	BosL1B	-	3	TRUE	FALSE	TRUE	FALSE
ctg21-7375032-7375473	84.3881	93.776	72.0426	21.7334	0.00149782	0.0450387	LRRC28	181.88	-1.45553	0.00119025	BosBovB	-	3	TRUE	FALSE	TRUE	FALSE
ctg22-28205640-28206067	82.466	87.7703	75.9067	11.8637	0.000473624	0.0303043	PDZRN3	10.0316	-1.89931	0.0173427	BosBovB	-	7	TRUE	FALSE	TRUE	FALSE
ctg22-42770245-42771122	74.8218	83.4427	64.2115	19.2312	0.000311152	0.0262875	FAM107A	415.037	-5.69962	9.76e-08	BosL1B	-	3	TRUE	FALSE	TRUE	FALSE
ctg22-42990370-42990719	91.5624	96.0836	85.7015	10.3821	0.000793191	0.0368467	PXK	1367.24	1.20373	0.00980998	BosL1B	+	4	TRUE	FALSE	TRUE	FALSE
ctg22-44615728-44616068	73.7626	79.3874	66.3167	13.0707	0.00038477	0.028234	ERC2	4.06909	-2.98635	0.0126196	BosBovB	-	3	TRUE	FALSE	TRUE	FALSE
ctg22-44864315-44864845	71.8432	79.1711	62.0706	17.1005	0.00149782	0.0450387	ERC2	4.06909	-2.98635	0.0126196	BosBovB	-	4	TRUE	FALSE	TRUE	FALSE
ctg22-53421924-53422310	59.5788	52.3274	68.2048	-15.8774	0.00015926	0.0223249	CCR9	58.3333	-1.31483	0.0484706	BosBovB	-	4	TRUE	FALSE	TRUE	FALSE
ctg22-54145149-54145623	79.3774	86.4303	70.8524	15.5779	0.000126017	0.0210476	CDCP1	310.03	-2.70464	7.34e-06	BosBovB	-	7	TRUE	TRUE	FALSE	FALSE
ctg22-583726-585847	88.0121	93.6734	80.8203	12.8531	0.00171346	0.0484939	VOPP1	101.167	-1.16593	0.0124921	BosL1B	-	6	TRUE	FALSE	TRUE	FALSE
ctg22-58700014-58701768	81.6713	89.6029	72.0425	17.5604	0.000473624	0.0303043	IQSEC1	1963.95	2.37416	2.39e-05	BosL1B	+	18	TRUE	FALSE	TRUE	FALSE
ctg22-58799082-58799282	46.2968	37.0151	57.7205	-20.7054	0.00103778	0.0393834	IQSEC1	1963.95	2.37416	2.39e-05	BosL1B	-	6	TRUE	FALSE	TRUE	FALSE
ctg22-58824501-58825214	87.9848	94.83	79.4548	15.3752	0.00103778	0.0393834	IQSEC1	1963.95	2.37416	2.39e-05	BosBovB	-	7	TRUE	FALSE	TRUE	FALSE
ctg22-638891-639270	93.0547	97.77	87.6153	10.1547	0.00012652	0.0211128	VOPP1	101.167	-1.16593	0.0124921	BosBovB	+	6	TRUE	FALSE	TRUE	FALSE
ctg22-6459068-6462707	75.3392	80.9495	68.3259	12.6236	2.67594e-05	0.0161846	OSBPL10	107.012	-3.09757	9.07e-05	BosL1A3	+	52	TRUE	FALSE	TRUE	FALSE
ctg22-6463837-6465505	83.7249	88.9312	77.2501	11.6811	0.000858483	0.0368467	OSBPL10	107.012	-3.09757	9.07e-05	BosL1A3	+	5	TRUE	FALSE	TRUE	FALSE
ctg22-6478452-6478578	49.4908	37.9594	63.6833	-25.724	0.00038477	0.028234	OSBPL10	107.012	-3.09757	9.07e-05	BosL1B	+	3	TRUE	FALSE	TRUE	FALSE
ctg22-678892-679560	89.0723	94.5165	83.0812	11.4353	0.000286946	0.0262875	VOPP1	101.167	-1.16593	0.0124921	BosBovB	+	4	TRUE	FALSE	TRUE	FALSE
ctg23-13102902-13104510	85.0375	91.8526	77.0148	14.8378	2.85866e-06	0.0138096	KCNK5	90.4196	-3.00924	4.19e-05	BosL1B	+	7	TRUE	FALSE	FALSE	TRUE
ctg23-15145112-15145427	84.1862	94.0867	71.1411	22.9456	0.00184607	0.0497498	TREM1	2301.86	1.94911	0.00291564	BosBovB	-	3	TRUE	FALSE	TRUE	FALSE
ctg23-19673451-19673796	87.0513	93.7267	79.8404	13.8863	5.9973e-05	0.0184022	RCAN2	7.13692	-2.21142	0.0402416	BosL1B	+	5	TRUE	FALSE	TRUE	FALSE
ctg23-20711680-20711923	78.33	85.5113	69.7045	15.8068	0.00149782	0.0450387	ADGRF2	3.68287	-2.2043	0.0342279	BosBovB	-	4	TRUE	FALSE	TRUE	FALSE
ctg23-28493911-28493981	8.6731	0.73372	18.3742	-17.6405	0.00169868	0.0484939	LOC512672	2408.02	1.31111	0.0010343	BosBovB	+	7	TRUE	FALSE	TRUE	FALSE
ctg23-32336117-32336874	13.3433	2.77986	25.2489	-22.4691	6.64263e-05	0.0192534	CARMIL1	562.035	-2.31716	3.1e-05	BosL1B	+	3	TRUE	FALSE	TRUE	FALSE
ctg23-40605181-40605254	89.1393	97.8932	78.6564	19.2368	0.000180747	0.0236464	ATXN1	775.061	1.13731	0.00638073	BosBovB	+	3	TRUE	FALSE	TRUE	FALSE
ctg23-43771971-43772694	78.5376	84.5569	71.1292	13.4276	0.00124915	0.0422702	PHACTR1	835.393	1.31189	0.000215899	BosL1B	+	5	TRUE	FALSE	TRUE	FALSE
ctg23-9090903-9091412	85.7235	93.6743	76.4711	17.2033	0.000250236	0.0249233	TCP11	17.7134	1.86	0.0197425	BosBovB	+	4	TRUE	FALSE	TRUE	FALSE
ctg24-20554256-20555283	81.9431	89.1225	73.1069	16.0156	0.00038477	0.028234	FHOD3	11.7833	-2.73976	0.0021001	BosL1A6	-	5	TRUE	FALSE	TRUE	FALSE
ctg24-37163529-37164036	62.9846	58.3196	68.7262	-10.4066	0.000200254	0.0236464	LPIN2	2599.12	1.22594	0.00302462	BosBovB	+	11	TRUE	FALSE	TRUE	FALSE
ctg24-37313552-37314594	80.5748	85.3138	74.9319	10.3819	0.00038477	0.028234	MYOM1	36.3073	-2.7772	0.000168402	BosL1B	+	7	TRUE	FALSE	TRUE	FALSE
ctg24-42345362-42345434	89.5661	94.4281	83.5821	10.8461	0.000488955	0.0309333	PIEZO2	9.5255	-2.40344	0.00666525	BosBovB	-	3	TRUE	FALSE	TRUE	FALSE
ctg24-45789422-45789545	26.4979	8.82583	48.7767	-39.9508	4.62101e-05	0.017501	PSTPIP2	3390.86	2.75314	1.43e-05	BosBovB	-	4	TRUE	FALSE	TRUE	FALSE
ctg24-45821270-45821525	92.2391	96.7698	86.6628	10.107	0.00181979	0.0492778	PSTPIP2	3390.86	2.75314	1.43e-05	BosBovB	-	3	TRUE	FALSE	TRUE	FALSE
ctg24-49517177-49517674	84.4647	93.2535	73.7737	19.4798	0.00015926	0.0223249	MYO5B	256.256	-2.98252	0.000109366	BosBovB	-	6	TRUE	FALSE	TRUE	FALSE
ctg24-49521594-49521786	60.9333	69.6346	50.1671	19.4675	0.000858483	0.0368467	MYO5B	256.256	-2.98252	0.000109366	BosBovB	+	9	TRUE	FALSE	TRUE	FALSE
ctg24-50179812-50179932	87.259	94.2706	78.6292	15.6414	7.73607e-05	0.0192534	MAPK4	86.4877	-5.35713	1.35e-05	BosBovB	+	5	TRUE	FALSE	TRUE	FALSE
ctg24-52483050-52483371	72.6709	84.7473	57.6407	27.1066	5.9973e-05	0.0184022	DCC	2.03848	-3.30748	0.0360041	BosL1B	-	8	TRUE	FALSE	TRUE	FALSE
ctg24-7561439-7561799	84.7838	90.7435	78.6566	12.0869	7.73607e-05	0.0192534	DOK6	5.45547	-2.95453	0.00608786	BosL1B	+	7	TRUE	FALSE	TRUE	FALSE
ctg24-7725968-7727383	76.139	81.5798	69.4685	12.1113	3.52765e-05	0.0168683	DOK6	5.45547	-2.95453	0.00608786	BosL1A6	+	6	TRUE	FALSE	TRUE	FALSE
ctg25-10263988-10264174	56.9475	48.5879	67.1154	-18.5275	0.000126017	0.0210476	LITAF	6254	1.49493	0.00129476	BosBovB	-	10	TRUE	FALSE	FALSE	TRUE
ctg25-17015973-17016052	78.1642	83.4189	71.589	11.8299	0.000580014	0.032187	TMC5	71.2338	-5.83919	2.23e-05	BosBovB	+	7	TRUE	FALSE	TRUE	FALSE
ctg25-17427515-17428231	79.1097	87.0179	69.572	17.4458	0.00103778	0.0393834	IQCK	5.33805	-2.05684	0.0177964	BosBovB	-	3	TRUE	FALSE	TRUE	FALSE
ctg25-1826930-1827047	82.2342	95.3802	65.9822	29.398	2.30751e-05	0.0161846	ABCA3	878.893	1.00805	0.00193685	BosL1B	-	4	TRUE	FALSE	TRUE	FALSE
ctg25-25710080-25710417	23.2893	11.7057	38.1763	-26.4706	0.00103778	0.0393834	XPO6	8813.1	1.67151	0.000996087	BosL1A6	+	6	TRUE	FALSE	TRUE	FALSE
ctg25-34120817-34121008	86.781	93.4357	78.5907	14.8451	2.67594e-05	0.0161846	RHBDD2	765.617	1.06642	0.00272091	BosBovB	-	7	TRUE	FALSE	FALSE	TRUE
ctg25-37709445-37710077	82.2243	90.0826	72.5007	17.582	0.000707298	0.0344551	BAIAP2L1	119.605	-2.54119	0.000268571	BosL1A6	-	11	TRUE	FALSE	TRUE	FALSE
ctg25-3954969-3955722	57.6595	62.3061	51.7718	10.5343	0.00103778	0.0393834	PPL	166.485	-2.92739	1.3e-05	BosL1B	+	15	TRUE	FALSE	TRUE	FALSE
ctg25-39583169-39583582	87.3971	93.5949	79.3729	14.2221	9.90217e-05	0.0201357	SDK1	72.7772	-2.20662	0.000133804	BosL1B	+	8	TRUE	FALSE	TRUE	FALSE
ctg26-15545896-15547681	66.9067	75.7493	56.6539	19.0954	0.00103778	0.0393834	PLCE1	64.6666	-4.62046	6.22e-07	BosL1B	-	18	TRUE	FALSE	TRUE	FALSE
ctg26-24263259-24263357	78.869	93.4386	63.2331	30.2055	7.21215e-05	0.0192534	SH3PXD2A	118.421	-1.89158	2.19e-05	BosBovB	+	5	TRUE	FALSE	TRUE	FALSE
ctg26-32709864-32710805	88.3287	96.2516	78.5776	17.674	0.000250236	0.0249233	GPAM	2295.61	-4.47195	5.7e-06	BosL1B	+	6	TRUE	FALSE	TRUE	FALSE
ctg26-32712612-32713771	86.1297	92.6347	78.2069	14.4278	9.90217e-05	0.0201357	GPAM	2295.61	-4.47195	5.7e-06	BosBovB	+	7	TRUE	FALSE	TRUE	FALSE
ctg26-41933607-41933814	86.7908	92.2127	80.3392	11.8735	0.00038477	0.028234	TACC2	96.4835	-2.53623	1.78e-07	BosBovB	-	8	TRUE	FALSE	TRUE	FALSE
ctg26-49040767-49040806	87.2286	94.8229	77.3978	17.4252	0.000722647	0.035171	MGMT	49.8835	-1.04843	0.0376915	BosBovB	+	3	TRUE	FALSE	TRUE	FALSE
ctg26-49043085-49043926	86.0691	90.9155	80.1039	10.8116	0.00149782	0.0450387	MGMT	49.8835	-1.04843	0.0376915	BosBovB	+	7	TRUE	FALSE	TRUE	FALSE
ctg26-7357869-7357942	80.6099	91.4281	67.4865	23.9416	0.000250236	0.0249233	PRKG1	49.5835	-5.48073	4.64e-06	BosBovB	-	4	TRUE	FALSE	TRUE	FALSE
ctg26-7742451-7743351	81.3386	88.4867	72.8511	15.6356	0.000200254	0.0236464	PRKG1	49.5835	-5.48073	4.64e-06	BosBovB	+	8	TRUE	FALSE	TRUE	FALSE
ctg26-788914-789623	90.9484	95.8538	84.4363	11.4174	0.00124915	0.0422702	IPMK	1133.31	1.15256	0.000229347	BosBovB	-	5	TRUE	FALSE	TRUE	FALSE
ctg26-8015359-8015579	78.6089	90.4807	63.9974	26.4833	0.00124915	0.0422702	PRKG1	49.5835	-5.48073	4.64e-06	BosBovB	+	6	TRUE	FALSE	TRUE	FALSE
ctg26-8263913-8264702	77.4783	85.3394	68.241	17.0984	0.00108524	0.0407167	PRKG1	49.5835	-5.48073	4.64e-06	BosBovB	+	5	TRUE	FALSE	TRUE	FALSE
ctg27-1145794-1147480	70.0367	75.7314	63.323	12.4085	0.000250236	0.0249233	DLGAP2	3.49671	-3.88851	0.00266726	BosL1A5	+	6	TRUE	FALSE	TRUE	FALSE
ctg27-15792730-15793234	80.3738	75.6879	86.2147	-10.5268	0.00178879	0.0484939	SORBS2	19.4812	-2.97601	0.000279306	BosBovB	+	7	TRUE	FALSE	TRUE	FALSE
ctg27-21486103-21486517	75.2785	84.262	63.9462	20.3158	0.00178879	0.0484939	TUSC3	16.0526	-2.93666	0.00240653	BosL1B	+	6	TRUE	FALSE	TRUE	FALSE
ctg27-37157749-37157905	66.4862	55.7869	79.3891	-23.6022	4.09643e-06	0.0139836	IKBKB	1144.83	1.32589	0.000143635	BosL1B	-	4	TRUE	FALSE	TRUE	FALSE
ctg27-37161261-37161474	71.5859	80.0962	61.1115	18.9847	5.9973e-05	0.0184022	IKBKB	1144.83	1.32589	0.000143635	BosL1A6	-	5	TRUE	FALSE	TRUE	FALSE
ctg27-41525246-41526182	82.2144	87.1548	75.5951	11.5597	0.00117239	0.0422702	THRB	401.041	-2.16533	0.00187141	BosBovB	-	4	TRUE	FALSE	TRUE	FALSE
ctg27-669816-672013	71.1655	76.875	64.6408	12.2342	0.000473624	0.0303043	DLGAP2	3.49671	-3.88851	0.00266726	BosBovB	+	5	TRUE	FALSE	TRUE	FALSE
ctg27-701454-706407	62.7258	67.4735	56.8111	10.6624	0.000858483	0.0368467	DLGAP2	3.49671	-3.88851	0.00266726	BosL1A3	-	15	TRUE	FALSE	TRUE	FALSE
ctg27-865469-865973	84.8396	90.2188	78.0932	12.1257	0.000250236	0.0249233	DLGAP2	3.49671	-3.88851	0.00266726	BosL1B	+	6	TRUE	FALSE	TRUE	FALSE
ctg27-903096-903612	55.4088	61.3664	48.2423	13.1241	0.00103778	0.0393834	DLGAP2	3.49671	-3.88851	0.00266726	BosBovB	+	3	TRUE	FALSE	TRUE	FALSE
ctg28-10515509-10516655	63.3824	69.3836	55.7276	13.656	0.000473624	0.0303043	RYR2	5.10164	-3.10524	0.0142716	BosL1B	+	3	TRUE	FALSE	TRUE	FALSE
ctg28-22548341-22549163	63.6933	72.0783	54.0487	18.0296	3.52765e-05	0.0168683	CTNNA3	24.5664	-2.84137	0.00983934	BosBovB	-	3	TRUE	FALSE	TRUE	FALSE
ctg28-22778935-22780545	81.7097	87.1444	75.0208	12.1236	0.00124915	0.0422702	CTNNA3	24.5664	-2.84137	0.00983934	BosBovB	-	5	TRUE	FALSE	TRUE	FALSE
ctg28-22810603-22811505	81.0226	86.6795	74.726	11.9534	0.000707298	0.0344551	CTNNA3	24.5664	-2.84137	0.00983934	BosBovB	+	4	TRUE	FALSE	TRUE	FALSE
ctg28-22838692-22839640	85.1217	90.0206	79.3522	10.6684	0.00124915	0.0422702	CTNNA3	24.5664	-2.84137	0.00983934	BosBovB	-	5	TRUE	FALSE	TRUE	FALSE
ctg28-22884781-22885103	75.1266	83.7813	65.0937	18.6876	5.74679e-06	0.0139836	CTNNA3	24.5664	-2.84137	0.00983934	BosL1A8	+	3	TRUE	FALSE	TRUE	FALSE
ctg28-23125045-23125654	85.0219	90.0743	79.0677	11.0066	0.00178879	0.0484939	CTNNA3	24.5664	-2.84137	0.00983934	BosL1B	+	6	TRUE	FALSE	TRUE	FALSE
ctg28-23598891-23600118	81.6856	86.5865	75.7635	10.823	0.000707298	0.0344551	CTNNA3	24.5664	-2.84137	0.00983934	BosBovB	-	4	TRUE	FALSE	TRUE	FALSE
ctg28-26612760-26613356	87.1986	92.9719	80.0931	12.8788	0.00015926	0.0223249	EIF4EBP2	813.436	-1.09049	0.00133021	BosL1B	-	5	TRUE	FALSE	TRUE	FALSE
ctg28-29543020-29543478	85.7191	95.8431	73.1569	22.6862	0.000210536	0.0245301	USP54	268.424	-1.74008	2.88e-05	BosBovB	+	6	TRUE	FALSE	TRUE	FALSE
ctg28-31717868-31718936	89.0811	94.5387	82.4505	12.0882	0.000858483	0.0368467	LRMDA	155.022	1.07301	0.00410661	BosBovB	+	4	TRUE	FALSE	TRUE	FALSE
ctg28-33254312-33254618	83.6371	89.8833	75.8782	14.0051	5.9973e-05	0.0184022	KCNMA1	29.2883	-5.42253	5.17e-05	BosL1B	+	5	TRUE	FALSE	TRUE	FALSE
ctg28-33573580-33574137	83.9136	91.511	74.296	17.2149	0.000311152	0.0262875	DLG5	190.592	-1.52434	0.000439364	BosBovB	+	5	TRUE	FALSE	TRUE	FALSE
ctg28-36965798-36966234	77.0224	84.4955	68.2623	16.2332	0.00149782	0.0450387	NRG3	3.00914	-3.73334	0.01338	BosL1A5	-	5	TRUE	FALSE	TRUE	FALSE
ctg28-41434330-41434801	84.4542	91.2151	75.9608	15.2543	0.000473624	0.0303043	BMPR1A	121.983	-1.56297	0.0118828	BosBovB	-	9	TRUE	FALSE	TRUE	FALSE
ctg28-43033802-43034258	89.6764	94.193	84.1051	10.0879	0.00149782	0.0450387	WDFY4	7568.47	1.03481	0.0190865	BosBovB	+	6	TRUE	FALSE	TRUE	FALSE
ctg29-10072283-10073122	77.8524	85.0869	68.4239	16.663	7.73607e-05	0.0192534	DLG2	21.2322	-1.68922	0.0311416	BosL1A6	-	5	TRUE	FALSE	TRUE	FALSE
ctg29-10078016-10080321	70.0438	75.1415	63.8429	11.2987	0.000580014	0.032187	DLG2	21.2322	-1.68922	0.0311416	BosL1A6	-	12	TRUE	FALSE	TRUE	FALSE
ctg29-10153514-10155355	70.9263	75.8745	64.8307	11.0437	0.000707298	0.0344551	DLG2	21.2322	-1.68922	0.0311416	BosL1A6	-	11	TRUE	FALSE	TRUE	FALSE
ctg29-11721848-11722673	79.2867	85.8559	71.1038	14.752	1.09926e-05	0.0145334	DLG2	21.2322	-1.68922	0.0311416	BosL1B	-	8	TRUE	FALSE	TRUE	FALSE
ctg29-1485369-1485686	84.0835	91.6537	74.9048	16.7489	0.000380922	0.028234	DEUP1	24.0025	-3.52972	0.0017734	BosL1B	-	3	TRUE	FALSE	TRUE	FALSE
ctg29-16946118-16946286	78.6316	84.3177	71.6333	12.6844	0.000473624	0.0303043	TENM4	11.75	-2.58914	0.00372551	BosBovB	-	3	TRUE	FALSE	TRUE	FALSE
ctg29-18004007-18004703	85.8129	91.089	79.5146	11.5744	0.000200254	0.0236464	LOC112444864	3.25965	-2.65723	0.0105063	BosBovB	-	5	TRUE	FALSE	FALSE	TRUE
ctg29-18019264-18019369	80.7408	94.0908	64.0957	29.9951	7.73607e-05	0.0192534	KCTD14	21.58	-1.61474	0.034133	BosBovB	-	9	TRUE	FALSE	FALSE	TRUE
ctg29-41990066-41990390	57.5149	46.2359	71.5098	-25.2739	0.000473624	0.0303043	PLA2G16	265.357	-1.42278	0.00623097	BosL1B	+	3	TRUE	FALSE	TRUE	FALSE
ctg29-42478795-42479623	83.2084	92.5806	71.571	21.0096	0.000200254	0.0236464	MACROD1	103.472	-1.21827	0.00623568	BosBovB	-	6	TRUE	FALSE	FALSE	TRUE
ctg29-43105276-43105434	66.5221	61.8956	72.2162	-10.3205	0.00103778	0.0393834	EHD1	2110.58	1.16688	0.0189698	BosBovB	-	10	TRUE	TRUE	FALSE	FALSE
ctg29-46213047-46213219	83.1627	94.2574	69.3382	24.9192	0.00117074	0.0422702	CPT1A	4586.73	1.12542	0.0185612	BosBovB	+	7	TRUE	FALSE	TRUE	FALSE
ctg29-47302527-47302596	53.7911	43.4829	66.4966	-23.0137	0.000792006	0.0368467	ANO1	34.9214	-1.48502	0.0385969	BosBovB	+	3	TRUE	FALSE	TRUE	FALSE
ctg29-48061572-48062090	43.0764	32.7979	55.7269	-22.929	0.000126017	0.0210476	SHANK2	162.336	-2.97453	6.42e-05	BosL1B	+	3	TRUE	FALSE	TRUE	FALSE
ctg29-48089647-48090190	80.1897	89.2231	68.9107	20.3124	7.73607e-05	0.0192534	SHANK2	162.336	-2.97453	6.42e-05	BosL1B	+	6	TRUE	FALSE	TRUE	FALSE
ctg29-49252985-49253105	20.5541	3.51042	41.0615	-37.5511	0.000925319	0.0393834	LOC112444889	56.03	1.85254	0.00213233	BosL1B	+	3	TRUE	TRUE	FALSE	FALSE
ctg29-50602939-50603682	90.3907	95.0931	84.4869	10.6062	0.000250236	0.0249233	LOC101903832	127.746	1.28967	0.0217615	BosBovB	+	7	TRUE	FALSE	TRUE	FALSE
ctg29-6726709-6726858	74.2929	85.13	61.1888	23.9412	0.000858436	0.0368467	GRM5	2.81272	-3.9596	0.0109836	BosBovB	+	7	TRUE	FALSE	TRUE	FALSE
ctg29-7039710-7039889	81.6265	90.4169	70.9647	19.4522	0.000858483	0.0368467	GRM5	2.81272	-3.9596	0.0109836	BosBovB	-	4	TRUE	FALSE	TRUE	FALSE
ctg3-102231272-102231783	88.7809	94.2153	82.8176	11.3977	0.000126017	0.0210476	ST3GAL3	227.701	1.88394	0.000677163	BosBovB	-	7	TRUE	FALSE	TRUE	FALSE
ctg3-102255675-102255998	89.6336	95.6317	83.0942	12.5374	0.000924575	0.0393834	ST3GAL3	227.701	1.88394	0.000677163	BosBovB	+	8	TRUE	FALSE	TRUE	FALSE
ctg3-104452543-104453147	49.3175	38.7839	62.2821	-23.4982	2.80844e-05	0.0167972	LOC107132340	770.92	3.32211	6.38e-05	BosBovB	-	6	TRUE	TRUE	FALSE	FALSE
ctg3-110695507-110695582	68.1816	79.5417	54.2	25.3417	0.000250236	0.0249233	TMEM35B	43.2602	-1.93386	0.00292682	BosBovB	+	6	TRUE	FALSE	TRUE	FALSE
ctg3-118446634-118446878	77.959	88.2	65.3546	22.8454	0.00103778	0.0393834	HDAC4	390.855	1.12722	0.00155561	BosL1B	+	5	TRUE	FALSE	TRUE	FALSE
ctg3-118563261-118563803	83.1237	91.2024	73.1913	18.0111	0.00015926	0.0223249	LOC101907483	2.1253	-2.5359	0.0458026	BosBovB	-	4	TRUE	TRUE	FALSE	FALSE
ctg3-120273052-120273375	81.1114	89.8719	70.3292	19.5426	0.00103778	0.0393834	SNED1	7.71771	-3.4559	0.00091584	BosL1B	-	5	TRUE	FALSE	TRUE	FALSE
ctg3-24148081-24148398	81.8813	88.0366	75.1509	12.8857	0.000473624	0.0303043	TBX15	3.33672	-3.46037	0.0154885	BosL1B	-	5	TRUE	FALSE	TRUE	FALSE
ctg3-50030866-50031625	88.5488	94.6202	82.2951	12.3251	0.00111787	0.0419245	FNBP1L	390.263	-1.70042	0.002399	BosBovB	+	4	TRUE	FALSE	TRUE	FALSE
ctg3-51513467-51513786	87.5534	93.0871	80.754	12.3331	0.00103778	0.0393834	TGFBR3	702.559	-2.17307	0.00263788	BosBovB	-	10	TRUE	FALSE	TRUE	FALSE
ctg3-66557190-66559808	81.8286	88.6913	73.5956	15.0956	7.73607e-05	0.0192534	GIPC2	187.379	-6.1227	1.8e-05	BosL1A3	+	18	TRUE	FALSE	TRUE	FALSE
ctg3-74336823-74337830	77.898	83.2253	71.4722	11.7531	0.00149782	0.0450387	PTGER3	6.62025	-1.95457	0.0251162	BosBovB	+	3	TRUE	FALSE	TRUE	FALSE
ctg3-83918713-83919499	77.9281	90.6318	62.4543	28.1775	0.000707298	0.0344551	PATJ	325.221	-3.28471	2.18e-05	BosL1A3	+	23	TRUE	FALSE	TRUE	FALSE
ctg3-86256564-86256916	22.0158	10.2424	35.7404	-25.498	0.000707298	0.0344551	FGGY	245.308	1.48747	0.00116819	BosL1B	+	4	TRUE	FALSE	TRUE	FALSE
ctg3-89513372-89514828	79.3371	84.8544	72.3553	12.4991	0.000200254	0.0236464	PRKAA2	304.947	-5.54834	1.74e-08	BosL1B	+	5	TRUE	FALSE	TRUE	FALSE
ctg3-93445076-93445606	71.8878	80.7474	62.3882	18.3593	5.9973e-05	0.0184022	ECHDC2	79.849	-3.14438	0.000875546	BosBovB	-	7	TRUE	FALSE	TRUE	FALSE
ctg3-96405628-96406269	64.5099	69.5786	58.4149	11.1637	0.00103778	0.0393834	BEND5	21.6081	-2.28726	0.00606974	BosBovB	-	4	TRUE	FALSE	TRUE	FALSE
ctg3-96840973-96846073	66.1359	71.1333	60.0568	11.0765	0.00124915	0.0422702	BEND5	21.6081	-2.28726	0.00606974	BosL1A6	-	9	TRUE	FALSE	TRUE	FALSE
ctg30-102109447-102109512	84.5899	90.5921	77.1304	13.4617	3.52765e-05	0.0168683	NYX	113.48	3.19285	4.28e-05	BosBovB	+	5	TRUE	TRUE	FALSE	FALSE
ctg30-105080435-105081097	70.8749	78.545	61.9841	16.5609	0.000250236	0.0249233	SRPX	10.3211	-2.89153	0.00172159	BosL1B	+	5	TRUE	FALSE	TRUE	FALSE
ctg30-119358757-119359389	72.0722	77.3307	65.8864	11.4442	0.00149782	0.0450387	APOO	71.1185	-1.32635	0.000309656	BosL1B	+	3	TRUE	FALSE	TRUE	FALSE
ctg30-119381823-119382053	76.9733	82.7109	69.9115	12.7994	0.000473624	0.0303043	APOO	71.1185	-1.32635	0.000309656	BosL1A6	-	4	TRUE	FALSE	TRUE	FALSE
ctg30-124844030-124844550	76.8142	81.7311	70.4788	11.2523	0.00149782	0.0450387	CDKL5	60.4522	-1.58838	0.0152702	BosL1A6	+	3	TRUE	FALSE	TRUE	FALSE
ctg30-31487573-31488028	79.3084	84.9947	73.0684	11.9263	0.00135658	0.0450387	AFF2	124.371	1.47515	0.00195648	BosBovB	-	3	TRUE	FALSE	TRUE	FALSE
ctg30-53353151-53354174	67.1376	73.1994	59.4883	13.711	1.49417e-05	0.014777	IL1RAPL2	2.50637	-2.39005	0.0375096	BosL1A6	-	5	TRUE	FALSE	TRUE	FALSE
ctg30-53736863-53737689	46.2761	52.2208	38.4774	13.7434	0.000200254	0.0236464	IL1RAPL2	2.50637	-2.39005	0.0375096	BosL1A6	-	3	TRUE	FALSE	TRUE	FALSE
ctg30-76255467-76256541	73.1243	78.0964	66.8763	11.2201	0.000126017	0.0210476	NEXMIF	33.9858	-2.00375	0.00422865	BosL1B	-	5	TRUE	FALSE	TRUE	FALSE
ctg30-76911590-76912117	85.7103	91.4204	78.9113	12.5091	0.00149782	0.0450387	LOC104970537	314.729	1.46879	7.22e-05	BosL1A3	-	9	TRUE	FALSE	TRUE	FALSE
ctg30-79964615-79964692	88.3114	92.8863	82.6808	10.2055	0.00178879	0.0484939	DLG3	88.5209	-2.62564	0.000147716	BosBovB	-	5	TRUE	FALSE	TRUE	FALSE
ctg4-104336152-104337117	76.6057	81.7126	70.1173	11.5953	0.000488955	0.0309333	TMEM178B	6.57328	-2.30355	0.0366264	BosL1B	-	7	TRUE	FALSE	TRUE	FALSE
ctg4-104500532-104501050	67.2603	74.5	58.35	16.15	0.000126017	0.0210476	TMEM178B	6.57328	-2.30355	0.0366264	BosL1B	-	3	TRUE	FALSE	TRUE	FALSE
ctg4-104510043-104510740	64.076	73.8739	51.8889	21.985	0.000580014	0.032187	TMEM178B	6.57328	-2.30355	0.0366264	BosL1A8	-	3	TRUE	FALSE	TRUE	FALSE
ctg4-104618343-104618616	64.3611	70.7062	56.2127	14.4935	0.000580014	0.032187	TMEM178B	6.57328	-2.30355	0.0366264	BosL1B	+	3	TRUE	FALSE	TRUE	FALSE
ctg4-109685395-109685867	73.1912	79.9777	64.5955	15.3822	0.00103778	0.0393834	CNTNAP2	4.56782	-2.63654	0.0302098	BosBovB	+	4	TRUE	FALSE	TRUE	FALSE
ctg4-110989598-110990115	68.8909	74.2106	62.1817	12.0288	4.62101e-05	0.017501	CNTNAP2	4.56782	-2.63654	0.0302098	BosL1B	-	5	TRUE	FALSE	TRUE	FALSE
ctg4-111179342-111180141	70.9612	77.3757	62.8706	14.5052	0.000250236	0.0249233	CNTNAP2	4.56782	-2.63654	0.0302098	BosBovB	+	7	TRUE	FALSE	TRUE	FALSE
ctg4-114751637-114752212	90.9731	95.7518	85.1869	10.5649	0.000311152	0.0262875	KMT2C	4981.66	1.05522	0.000422735	BosBovB	-	5	TRUE	FALSE	TRUE	FALSE
ctg4-119646837-119647521	34.472	22.3761	48.9354	-26.5593	0.00103778	0.0393834	VIPR2	55.5883	1.1229	0.0447331	BosL1A5	+	5	TRUE	FALSE	TRUE	FALSE
ctg4-32614747-32617677	80.1507	86.3517	72.3664	13.9853	0.000311152	0.0262875	RUNDC3B	59.3739	-4.35946	3.41e-05	BosL1A3	-	42	TRUE	FALSE	TRUE	FALSE
ctg4-32689524-32691114	70.3387	76.0998	62.9766	13.1232	0.000580014	0.032187	RUNDC3B	59.3739	-4.35946	3.41e-05	BosBovB	+	13	TRUE	FALSE	TRUE	FALSE
ctg4-36637768-36637832	86.5061	93.9524	77.4467	16.5057	0.00124915	0.0422702	SEMA3A	250.757	-1.97733	0.000220468	BosBovB	-	8	TRUE	TRUE	FALSE	FALSE
ctg4-44035773-44036652	61.025	53.1648	70.699	-17.5342	0.00015926	0.0223249	CCDC146	14.1458	1.75369	0.00609144	BosL1B	-	4	TRUE	FALSE	TRUE	FALSE
ctg4-49469189-49469815	74.8853	69.183	81.2939	-12.1108	0.000200254	0.0236464	NRCAM	22.9227	-3.26232	0.00225223	BosL1A6	+	6	TRUE	FALSE	TRUE	FALSE
ctg4-5202393-5202801	80.6478	90.5289	67.6767	22.8522	0.000473624	0.0303043	GRB10	82.7579	-1.18569	0.00718352	BosBovB	-	7	TRUE	FALSE	TRUE	FALSE
ctg4-66186381-66187277	71.6044	67.2441	77.447	-10.2029	9.90217e-05	0.0201357	MTURN	526.535	-1.77489	0.00107635	BosL1B	+	6	TRUE	FALSE	TRUE	FALSE
ctg4-7279890-7280723	87.9918	94.0698	80.6212	13.4487	0.00124915	0.0422702	ABCA13	59.4827	2.44942	0.00127077	BosL1A3	+	11	TRUE	FALSE	TRUE	FALSE
ctg4-7281662-7285872	67.6765	74.0074	59.6244	14.383	0.000858483	0.0368467	ABCA13	59.4827	2.44942	0.00127077	BosL1A3	+	6	TRUE	FALSE	TRUE	FALSE
ctg4-7297131-7298136	80.5281	89.2382	69.903	19.3353	0.00103778	0.0393834	ABCA13	59.4827	2.44942	0.00127077	BosBovB	+	4	TRUE	FALSE	TRUE	FALSE
ctg4-7409317-7410106	84.5176	89.8687	77.7506	12.1181	0.00038477	0.028234	ABCA13	59.4827	2.44942	0.00127077	BosBovB	+	5	TRUE	FALSE	TRUE	FALSE
ctg4-78986880-78987011	82.4627	90.0083	73.8303	16.1779	0.00147414	0.0450387	GLI3	53.9962	-4.18357	5.88e-06	BosL1A8	-	3	TRUE	FALSE	TRUE	FALSE
ctg4-93166678-93167437	91.273	96.9806	84.5231	12.4575	0.00158966	0.0475045	AHCYL2	377.101	-1.35428	0.00531909	BosBovB	+	7	TRUE	FALSE	TRUE	FALSE
ctg4-94716120-94716844	53.2783	47.1256	61.054	-13.9284	4.62101e-05	0.017501	LOC107131356	713.928	1.34123	0.0051648	BosBovB	+	7	TRUE	FALSE	TRUE	FALSE
ctg4-98809536-98809626	68.8437	64.4237	74.5574	-10.1337	1.09926e-05	0.0145334	TMEM140	910.307	2.63639	1.31e-05	BosBovB	+	5	TRUE	FALSE	TRUE	FALSE
ctg5-100516748-100517286	87.1466	92.2022	80.8146	11.3875	0.00171346	0.0484939	KLRB1	17.2987	1.71666	0.0261549	BosBovB	-	3	TRUE	FALSE	TRUE	FALSE
ctg5-10405823-10405972	70.4765	63.7215	78.359	-14.6375	0.00149782	0.0450387	LIN7A	139.357	-6.07923	1.69e-06	BosBovB	+	6	TRUE	FALSE	TRUE	FALSE
ctg5-108643349-108643990	84.569	89.5875	78.3923	11.1952	0.000858483	0.0368467	CACNA1C	21.3785	-2.43731	0.000482978	BosL1B	-	3	TRUE	FALSE	TRUE	FALSE
ctg5-110463091-110463188	80.3042	87.8275	71.3897	16.4378	0.00103778	0.0393834	NPTXR	12.9827	-2.29474	0.00020385	BosBovB	+	3	TRUE	FALSE	TRUE	FALSE
ctg5-12233331-12233495	86.7796	81.5245	92.6686	-11.144	3.52765e-05	0.0168683	TMTC2	72.0122	-1.06536	0.00110885	BosL1A6	-	4	TRUE	FALSE	TRUE	FALSE
ctg5-25481223-25481470	78.1617	84.6801	69.8384	14.8416	0.00149782	0.0450387	GLYCAM1	52612.3	-6.76119	5.23e-09	BosL1B	+	4	TRUE	FALSE	TRUE	FALSE
ctg5-43790587-43790885	80.7541	91.9094	66.5342	25.3752	0.00149782	0.0450387	BEST3	13.0121	-6.784	5.13e-06	BosL1B	-	4	TRUE	FALSE	TRUE	FALSE
ctg5-50777122-50777739	90.6236	95.6698	84.4128	11.257	0.000676282	0.0344551	PPM1H	1285.93	1.01612	0.00055595	BosBovB	-	3	TRUE	FALSE	TRUE	FALSE
ctg5-60631587-60633357	91.446	97.2659	83.8266	13.4393	0.000656807	0.0344551	CDK17	1385.49	1.17379	0.0136426	BosBovB	+	6	TRUE	FALSE	TRUE	FALSE
ctg5-60651736-60652406	58.6088	50.4336	69.5874	-19.1538	0.000126017	0.0210476	CDK17	1385.49	1.17379	0.0136426	BosBovB	-	11	TRUE	FALSE	TRUE	FALSE
ctg5-66699657-66700920	82.7959	87.7904	76.6423	11.1481	0.00015926	0.0223249	PAH	1653.84	-7.63084	1.07e-09	BosBovB	+	13	TRUE	FALSE	TRUE	FALSE
ctg5-67696751-67696849	77.2033	90.5324	60.9373	29.5952	0.00124915	0.0422702	GLT8D2	13.8035	-5.7305	0.00036812	BosL1B	-	3	TRUE	FALSE	FALSE	TRUE
ctg5-70297989-70298214	81.9121	93.2409	67.5925	25.6484	2.67594e-05	0.0161846	CRY1	261.728	-1.07001	0.00187429	BosL1A2	-	4	TRUE	FALSE	TRUE	FALSE
ctg5-79993363-79993771	82.5185	89.0721	75.2806	13.7916	4.62101e-05	0.017501	TMTC1	23.2435	-2.16493	0.000139605	BosL1B	-	3	TRUE	FALSE	TRUE	FALSE
ctg5-94124314-94124472	78.5515	85.7372	69.6864	16.0508	2.67594e-05	0.0161846	EPS8	418.025	-1.7335	0.00679815	BosBovB	+	6	TRUE	FALSE	FALSE	TRUE
ctg6-102100229-102100487	45.6756	34.9219	60.0266	-25.1047	0.000250236	0.0249233	KLHL8	4892.28	2.83334	1.93e-06	BosL1B	-	3	TRUE	TRUE	FALSE	FALSE
ctg6-114145665-114145710	34.6358	18.0031	55.1067	-37.1036	0.000311152	0.0262875	AFAP1	100.036	-1.70574	0.00127091	BosBovB	-	4	TRUE	FALSE	TRUE	FALSE
ctg6-115531837-115532282	78.6031	87.9576	66.9237	21.0338	0.000707298	0.0344551	RGS12	145.182	-2.45501	0.000138511	BosL1B	+	11	TRUE	FALSE	TRUE	FALSE
ctg6-115925934-115926288	64.6672	70.0962	57.9854	12.1109	0.00103778	0.0393834	SH3BP2	5505.43	1.62142	0.000391574	BosL1A1	+	5	TRUE	FALSE	TRUE	FALSE
ctg6-116292865-116293130	84.9665	91.4022	77.3446	14.0576	0.000707298	0.0344551	ZFYVE28	243.984	2.83217	2.19e-05	BosL1B	+	9	TRUE	FALSE	TRUE	FALSE
ctg6-116343543-116344018	78.7362	83.9982	72.2599	11.7383	0.00149782	0.0450387	ZFYVE28	243.984	2.83217	2.19e-05	BosL1B	-	7	TRUE	FALSE	TRUE	FALSE
ctg6-16180023-16180063	85.0259	92.4832	76.5731	15.9101	0.000126017	0.0210476	COL25A1	5.86473	-3.69975	0.000650981	BosBovB	+	3	TRUE	FALSE	TRUE	FALSE
ctg6-24525379-24525673	85.8585	91.4466	78.9338	12.5127	4.62101e-05	0.017501	DDIT4L	3.37096	-3.52955	0.0311803	BosL1B	+	4	TRUE	FALSE	FALSE	TRUE
ctg6-36542075-36542551	89.5984	94.408	83.7187	10.6893	2.31287e-05	0.0161846	ABCG2	1325.53	-4.06944	2.33e-05	BosBovB	+	7	TRUE	FALSE	TRUE	FALSE
ctg6-44412967-44413514	71.6578	65.8753	79.9374	-14.0622	0.000250089	0.0249233	CCDC149	58.9986	-1.59472	0.00154436	BosBovB	+	6	TRUE	FALSE	TRUE	FALSE
ctg6-4543092-4543328	80.2262	91.432	69.0328	22.3992	0.00183285	0.049578	PRDM5	8.61267	-2.50763	0.00116495	BosL1B	-	5	TRUE	FALSE	TRUE	FALSE
ctg6-66961688-66962232	80.8893	87.0028	73.4803	13.5225	0.000793191	0.0368467	TEC	325.409	1.58204	0.00150447	BosL1B	+	3	TRUE	FALSE	TRUE	FALSE
ctg6-69565618-69565757	82.8266	90.5225	73.3546	17.1679	2.00696e-05	0.0154155	CHIC2	667.743	1.42947	0.000986638	BosBovB	-	5	TRUE	FALSE	TRUE	FALSE
ctg6-85650426-85651469	73.6638	80.7943	65.1729	15.6214	0.00015926	0.0223249	CSN3	105876	-5.96768	9.55e-07	BosBovB	+	9	TRUE	FALSE	TRUE	FALSE
ctg6-97470474-97470606	73.4681	87.219	56.472	30.747	7.73607e-05	0.0192534	SCD5	14.4655	-5.47234	3.07e-05	BosL1B	+	3	TRUE	FALSE	TRUE	FALSE
ctg6-97575784-97576139	53.5881	45.2145	63.8048	-18.5903	2.00696e-05	0.0154155	SCD5	14.4655	-5.47234	3.07e-05	BosL1B	+	4	TRUE	FALSE	TRUE	FALSE
ctg6-98346652-98346782	76.0685	87.9992	61.3846	26.6146	0.000200254	0.0236464	GPAT3	884.037	1.75127	0.00290744	BosBovB	+	4	TRUE	FALSE	TRUE	FALSE
ctg6-99677333-99677512	77.5211	70.9906	85.5587	-14.568	0.000250236	0.0249233	WDFY3	5203.07	1.19966	0.0107281	BosBovB	-	4	TRUE	FALSE	TRUE	FALSE
ctg7-101321538-101323501	82.6957	91.1201	73.5618	17.5583	9.90217e-05	0.0201357	SLCO4C1	115.15	1.72851	0.000358347	BosBovB	+	11	TRUE	FALSE	TRUE	FALSE
ctg7-10785444-10785994	89.4387	94.4583	84.2286	10.2297	0.00124915	0.0422702	LOC100299045	50.7704	2.47968	0.00273513	BosBovB	+	7	TRUE	FALSE	TRUE	FALSE
ctg7-10886096-10894434	80.0036	84.8249	73.9814	10.8435	0.000858483	0.0368467	LOC100299045	50.7704	2.47968	0.00273513	BosL1A2	-	22	TRUE	FALSE	TRUE	FALSE
ctg7-10900900-10901387	83.1801	92.45	73.3042	19.1457	0.00092863	0.0393834	LOC100299045	50.7704	2.47968	0.00273513	BosL1A3	+	6	TRUE	FALSE	TRUE	FALSE
ctg7-10921493-10922371	86.1746	91.6992	79.261	12.4382	0.000250236	0.0249233	LOC100299045	50.7704	2.47968	0.00273513	BosBovB	-	3	TRUE	FALSE	TRUE	FALSE
ctg7-10924398-10925602	78.9258	84.0772	72.5662	11.5111	0.00124915	0.0422702	LOC100299045	50.7704	2.47968	0.00273513	BosL1B	-	5	TRUE	FALSE	TRUE	FALSE
ctg7-10942415-10942900	83.7901	90.1638	75.7592	14.4046	0.000580014	0.032187	LOC100299045	50.7704	2.47968	0.00273513	BosBovB	-	4	TRUE	FALSE	TRUE	FALSE
ctg7-11144301-11144525	85.3448	92.7007	76.0905	16.6102	0.00126597	0.0424657	ADGRE3	3828.59	2.32453	0.00369355	BosL1B	-	5	TRUE	FALSE	TRUE	FALSE
ctg7-11283479-11283998	86.6226	95.2205	76.4428	18.7777	8.84122e-07	0.0126103	GIPC1	135.2	-1.14018	0.00330992	BosBovB	-	8	TRUE	FALSE	FALSE	TRUE
ctg7-12648408-12649232	87.0764	95.8193	76.8196	18.9996	0.000200254	0.0236464	SYCE2	19.8991	-1.04299	0.0424793	BosBovB	+	10	TRUE	FALSE	TRUE	FALSE
ctg7-17714648-17715102	63.7223	55.4732	73.901	-18.4278	8.84122e-07	0.0126103	VAV1	1486.94	1.41756	0.00280096	BosBovB	-	4	TRUE	TRUE	FALSE	FALSE
ctg7-19814216-19814344	90.2328	95.9844	83.1538	12.8305	0.000210536	0.0245301	EBI3	45.2034	1.39734	0.0336024	BosL1A3	-	3	TRUE	TRUE	FALSE	FALSE
ctg7-20242654-20243466	68.6417	76.8807	58.5013	18.3794	0.000707298	0.0344551	TJP3	174.633	-2.40419	4.28e-05	BosBovB	-	6	TRUE	FALSE	TRUE	FALSE
ctg7-20249500-20250036	66.5276	71.9728	59.9519	12.0208	0.00178879	0.0484939	TJP3	174.633	-2.40419	4.28e-05	BosBovB	+	4	TRUE	FALSE	TRUE	FALSE
ctg7-22652610-22653493	82.001	91.1004	71.2938	19.8066	0.000200254	0.0236464	MEIKIN	15.0132	1.80656	0.0087523	BosL1A3	-	22	TRUE	FALSE	TRUE	FALSE
ctg7-26464763-26465871	90.6407	95.1435	84.7378	10.4057	0.000210536	0.0245301	PRRC1	408.275	-1.17864	0.000677398	BosBovB	+	5	TRUE	FALSE	TRUE	FALSE
ctg7-46576472-46576581	6.82011	0.308333	14.8346	-14.5263	4.39091e-05	0.017501	LOC104969177	9.43683	2.17883	0.0259066	BosL1A6	-	3	TRUE	TRUE	FALSE	FALSE
ctg7-57810801-57811099	57.9478	65.1147	49.1254	15.9892	0.000250089	0.0249233	PPP2R2B	2.91576	-3.18718	0.0440775	BosL1A6	-	3	TRUE	FALSE	TRUE	FALSE
ctg7-5820356-5820394	54.4902	64.2115	42.5256	21.6858	2.67594e-05	0.0161846	MRPL34	98.8483	-1.0027	0.00652406	BosBovB	-	3	TRUE	TRUE	FALSE	FALSE
ctg7-62171006-62171598	52.216	43.9409	62.2145	-18.2735	0.000473624	0.0303043	LOC112447457	3.47158	2.60103	0.0248644	BosL1B	+	5	TRUE	FALSE	TRUE	FALSE
ctg7-80421008-80421284	83.0612	90.1203	74.3731	15.7472	0.00178879	0.0484939	WWC1	192.168	-2.97472	4.77e-05	BosL1B	+	6	TRUE	FALSE	TRUE	FALSE
ctg7-81057105-81057347	79.5327	86.6273	70.4599	16.1674	0.000126017	0.0210476	RASGRF2	6.4321	-2.14466	0.0395797	BosBovB	+	8	TRUE	FALSE	TRUE	FALSE
ctg7-95673966-95674405	87.2934	95.0294	77.7769	17.2525	0.000447443	0.0303043	LOC107132664	73.4663	1.5025	0.00547763	BosBovB	+	4	TRUE	TRUE	FALSE	FALSE
ctg8-112819962-112821620	90.7346	97.0052	83.6528	13.3524	0.00108524	0.0407167	SH3YL1	155.18	-1.71635	0.00119025	BosBovB	+	5	TRUE	FALSE	TRUE	FALSE
ctg8-1297648-1298371	81.0606	85.7056	75.3339	10.3717	0.00149782	0.0450387	SH3RF1	73.5021	-1.17427	0.0105329	BosBovB	+	10	TRUE	FALSE	TRUE	FALSE
ctg8-25473966-25474645	75.4076	79.9703	69.5942	10.3762	0.000473624	0.0303043	ADAMTSL1	3.16221	-3.16725	0.0419528	BosBovB	+	4	TRUE	FALSE	TRUE	FALSE
ctg8-29999554-30000208	85.8273	91.2555	79.2261	12.0294	0.00038477	0.028234	NFIB	1578.08	-3.67052	3.94e-05	BosBovB	-	4	TRUE	FALSE	TRUE	FALSE
ctg8-30017897-30019259	80.8953	87.7258	72.3788	15.347	0.000200254	0.0236464	NFIB	1578.08	-3.67052	3.94e-05	BosBovB	-	10	TRUE	FALSE	TRUE	FALSE
ctg8-31554575-31555135	86.4225	94.9785	75.7992	19.1793	0.000580014	0.032187	LURAP1L	105.297	-2.69633	0.000499961	BosBovB	+	7	TRUE	FALSE	TRUE	FALSE
ctg8-36509616-36510834	69.2491	62.9675	76.9527	-13.9852	0.000858483	0.0368467	PTPRD	9.90203	-2.51611	0.0382409	BosBovB	+	7	TRUE	FALSE	TRUE	FALSE
ctg8-59638551-59639082	87.2897	92.7008	80.6298	12.071	0.000311152	0.0262875	LOC516849	110.836	-6.07176	2.61e-06	BosL1B	+	4	TRUE	FALSE	TRUE	FALSE
ctg8-62124833-62125200	86.4216	95.5969	75.0761	20.5208	0.000673181	0.0344551	SHB	42.337	-1.2364	0.00256665	BosBovB	-	4	TRUE	FALSE	TRUE	FALSE
ctg8-63831731-63831938	85.5269	95.212	73.8716	21.3404	0.00178879	0.0484939	ANKS6	4.6311	-2.2958	0.0136916	BosBovB	-	11	TRUE	FALSE	TRUE	FALSE
ctg8-66996308-66996714	85.587	92.8084	76.692	16.1164	0.00092863	0.0393834	LPL	4485.88	-1.99323	2.13e-06	BosL1B	+	3	TRUE	FALSE	TRUE	FALSE
ctg8-66998581-66999365	88.5609	94.6871	81.0818	13.6054	0.000488955	0.0309333	LPL	4485.88	-1.99323	2.13e-06	BosBovB	-	5	TRUE	FALSE	TRUE	FALSE
ctg8-67000328-67000933	85.8987	93.1805	76.9365	16.2439	0.000200254	0.0236464	LPL	4485.88	-1.99323	2.13e-06	BosBovB	-	4	TRUE	FALSE	TRUE	FALSE
ctg8-70593074-70593290	78.0351	86.0524	68.2048	17.8477	0.000250236	0.0249233	LOC107132707	27.975	3.75008	0.0002739	BosBovB	+	9	TRUE	TRUE	FALSE	FALSE
ctg8-74546651-74546912	52.5228	39.8443	68.0359	-28.1916	0.000858483	0.0368467	PTK2B	4074.49	1.94016	4.06e-05	BosL1B	-	3	TRUE	FALSE	TRUE	FALSE
ctg9-15544219-15544918	71.6529	64.3785	80.169	-15.7905	0.00126597	0.0424657	MYO6	274.857	-1.86872	2.49e-05	BosL1B	-	3	TRUE	FALSE	TRUE	FALSE
ctg9-37055978-37056629	85.9028	93.6248	76.6686	16.9562	8.01604e-06	0.0139836	LOC104969531	52.2748	4.36333	1.49e-07	BosBovB	-	6	TRUE	FALSE	TRUE	FALSE
ctg9-66171378-66173124	79.289	74.574	84.7238	-10.1498	0.000311152	0.0262875	PTPRK	231.87	-3.00674	8.63e-05	BosBovB	+	6	TRUE	FALSE	TRUE	FALSE
ctg9-83947816-83948216	21.7624	8.20317	37.1889	-28.9857	0.000580014	0.032187	ADGB	38.833	1.39643	0.00152475	BosL1B	-	6	TRUE	FALSE	TRUE	FALSE
ctg9-88904800-88905234	85.4728	90.7585	79.1065	11.652	0.00103778	0.0393834	ESR1	245.421	-3.38145	2.33e-05	BosL1B	-	4	TRUE	FALSE	TRUE	FALSE
ctg9-89072206-89074687	84.5546	90.3768	77.6055	12.7713	0.000126017	0.0210476	ESR1	245.421	-3.38145	2.33e-05	BosBovB	-	12	TRUE	FALSE	TRUE	FALSE
ctg9-89214243-89214593	90.7134	96.3582	83.5551	12.803	0.000571959	0.032187	SYNE1	4323.95	1.05266	0.0222846	BosBovB	+	4	TRUE	FALSE	TRUE	FALSE
ctg9-89534248-89534297	87.9297	95.0336	79.1865	15.8471	0.00100256	0.0393834	SYNE1	4323.95	1.05266	0.0222846	BosBovB	+	4	TRUE	FALSE	TRUE	FALSE
ctg9-94551987-94552502	84.5528	92.7877	75.28	17.5077	8.66152e-05	0.0201357	SYNJ2	197.016	-2.10508	0.000199041	BosBovB	-	5	TRUE	FALSE	TRUE	FALSE
ctg9-9681808-9682272	64.3301	57.6735	72.4938	-14.8203	0.000250236	0.0249233	SDHAF4	80.1116	-1.08101	0.0224673	BosBovB	-	5	TRUE	FALSE	FALSE	TRUE

## Sheet: S5C_DM_ERV_overlap_DEgene
Table S5C Differentially methylated ERV retrotransposons overlap with differentially expressed genes related to Subclinical mastitis
ID (a unique identifier based on ERV genomic coordinates, combining chromosome, start, and end positions)	mean DNA methylation level in all samples	mean DNA methylation level in samples with S.aureus subclinical masistiis	mean DNA methylation level in controls samples	DNA methylation change	p_value	p_adj	gene	baseMean	log2FoldChange	padj	If overlap with gene	If overlap with exon	If overlap with intron	If overlap with promoter	family	strand	n_cpg
ctg1-107571156-107571520	48.9994	40.3539	59.6323	-19.2784	0.000580014	0.025158	SCHIP1	24.9911	-1.93573	7.13e-05	TRUE	FALSE	TRUE	FALSE	BosERV20	-	3
ctg1-107666701-107666914	76.4415	88.0624	62.805	25.2574	0.000707298	0.0271592	SCHIP1	24.9911	-1.93573	7.13e-05	TRUE	FALSE	TRUE	FALSE	BosERV12	+	4
ctg1-113507804-113508010	78.7093	90.6587	64.0023	26.6564	0.000311152	0.0207088	ARHGEF26	111.628	-3.62293	1.15e-05	TRUE	FALSE	TRUE	FALSE	BosERV12	-	5
ctg1-116868955-116869096	84.7486	96.5938	70.17	26.4237	0.00126071	0.0343076	P2RY14	135.755	1.39206	0.0217615	TRUE	TRUE	FALSE	FALSE	BosERV12	+	5
ctg1-116868988-116869187	88.131	96.8433	77.4082	19.4351	0.00214001	0.0436811	P2RY14	135.755	1.39206	0.0217615	TRUE	TRUE	FALSE	FALSE	BosERV12	-	7
ctg1-118345347-118345627	10.2469	1.92745	20.1242	-18.1967	0.00130376	0.0352913	RNF13	1634.08	1.36593	0.000813028	TRUE	FALSE	TRUE	FALSE	BosERV20	-	5
ctg1-118498703-118498773	83.4847	93.8789	70.3574	23.5215	0.000575562	0.025158	WWTR1	324.786	-1.58977	0.00176445	TRUE	FALSE	TRUE	FALSE	BosERV20	-	4
ctg1-118512903-118513102	81.7841	76.88	87.82	-10.94	0.000580014	0.025158	WWTR1	324.786	-1.58977	0.00176445	TRUE	FALSE	TRUE	FALSE	BosERV12	+	5
ctg1-118626027-118626340	82.3515	89.301	74.0149	15.2861	0.00124915	0.0343076	WWTR1	324.786	-1.58977	0.00176445	TRUE	FALSE	TRUE	FALSE	BosERV12	+	5
ctg1-118962970-118963161	62.347	68.9289	54.1493	14.7796	0.00015926	0.0168702	CP	31.8131	2.31311	0.047805	TRUE	FALSE	TRUE	FALSE	BosERV12	+	3
ctg1-142201952-142202031	77.0341	94.4756	55.6481	38.8275	0.000474196	0.0237007	C2CD2	110.813	-1.52558	5.46e-06	TRUE	FALSE	TRUE	FALSE	BosERV20	+	3
ctg1-146278541-146278681	78.1928	91.1273	61.9647	29.1626	0.000200254	0.0180833	S100B	1573.5	-4.58026	2.34e-06	TRUE	FALSE	TRUE	FALSE	BosERV12	+	4
ctg1-146576120-146576210	85.2052	92.1031	76.7154	15.3877	0.00092863	0.0308531	TDRP	36.0764	-4.87461	2.62e-06	TRUE	FALSE	TRUE	FALSE	BosERV19	-	3
ctg1-150708988-150709217	89.7506	95.6813	82.4513	13.23	0.000126017	0.015996	ERG	54.6941	1.52704	0.00411014	TRUE	FALSE	TRUE	FALSE	BosERV12	-	3
ctg1-150799522-150799661	19.0771	5.17679	36.1852	-31.0084	0.000317759	0.0210909	ERG	54.6941	1.52704	0.00411014	TRUE	FALSE	TRUE	FALSE	BosERV20	+	7
ctg1-150927438-150927657	85.0478	89.5728	79.4208	10.1519	0.000473624	0.0237007	ERG	54.6941	1.52704	0.00411014	TRUE	FALSE	TRUE	FALSE	BosERV20	-	4
ctg1-151167834-151167917	78.7201	93.5104	60.5167	32.9937	7.90549e-05	0.0148163	ETS2	2781.31	2.05866	0.00137743	TRUE	FALSE	TRUE	FALSE	BosERV11	+	3
ctg1-19338790-19338989	85.6437	97.55	72.1095	25.4405	0.00157908	0.0386752	LOC112447286	17.4248	1.01715	0.018315	TRUE	FALSE	TRUE	FALSE	BosERV12	+	5
ctg1-19340151-19340352	66.6195	79.124	51.2295	27.8945	0.000126017	0.015996	LOC112447286	17.4248	1.01715	0.018315	TRUE	FALSE	TRUE	FALSE	BosERV12	-	6
ctg1-22199475-22199708	84.5032	92.6359	74.4938	18.1422	4.62101e-05	0.013545	LOC107132175	199.099	1.20171	0.0358261	TRUE	FALSE	TRUE	FALSE	BosERV11	+	8
ctg1-24816511-24816714	77.867	85.9925	68.3237	17.6688	0.000200254	0.0180833	ROBO2	11.7305	-4.32834	0.000177088	TRUE	FALSE	TRUE	FALSE	BosERV12	-	6
ctg1-24973783-24973872	77.9629	87.2687	66.5096	20.7591	0.000311152	0.0207088	ROBO2	11.7305	-4.32834	0.000177088	TRUE	FALSE	TRUE	FALSE	BosERV11	-	4
ctg1-24982827-24982995	69.7845	64.9844	75.833	-10.8486	0.00178879	0.0402479	ROBO2	11.7305	-4.32834	0.000177088	TRUE	FALSE	TRUE	FALSE	BosERV12	-	3
ctg1-2511605-2511805	88.3336	93.7018	82.007	11.6948	8.60944e-05	0.0154941	LOC100848368	29.7224	3.2796	9.18e-05	TRUE	FALSE	FALSE	TRUE	BosERV12	-	3
ctg1-3834329-3834480	38.1224	47.1042	27.0679	20.0362	0.00178879	0.0402479	SOD1	424.808	-1.01188	0.00773246	TRUE	FALSE	FALSE	TRUE	BosERV20	+	3
ctg1-3835218-3835311	57.3451	65.3773	46.8381	18.5392	0.000473624	0.0237007	SOD1	424.808	-1.01188	0.00773246	TRUE	FALSE	FALSE	TRUE	BosERV11	-	4
ctg1-45903468-45903708	84.6666	79.4123	91.3058	-11.8935	5.59944e-07	0.00843159	SENP7	773.576	1.42156	0.000143782	TRUE	FALSE	TRUE	FALSE	BosERV12	-	6
ctg1-50025303-50025516	90.7244	96.1316	84.2462	11.8855	0.000250236	0.0190715	ALCAM	2208.03	1.09066	0.00154662	TRUE	FALSE	TRUE	FALSE	BosERV12	-	5
ctg1-56659975-56660174	82.822	89.4633	74.6481	14.8152	0.000580014	0.025158	PHLDB2	101.649	-3.14946	2.36e-05	TRUE	FALSE	TRUE	FALSE	BosERV12	+	4
ctg1-57237815-57237932	80.2247	94.931	62.5836	32.3475	2.99956e-05	0.0127862	BTLA	76.6203	3.29175	0.000202923	TRUE	FALSE	TRUE	FALSE	BosERV20	+	4
ctg1-64412650-64412849	85.6323	90.5492	79.5808	10.9684	0.00178879	0.0402479	POPDC2	3.33628	-3.05908	0.0326342	TRUE	FALSE	TRUE	FALSE	BosERV12	+	4
ctg1-65756799-65757000	82.5967	90.4938	73.0808	17.4131	0.00015926	0.0168702	STXBP5L	3.27303	-3.58522	0.0141306	TRUE	FALSE	TRUE	FALSE	BosERV12	+	3
ctg1-6790821-6791600	43.293	32.9984	56.0151	-23.0167	2.67594e-05	0.011936	BACH1	3687.93	1.37376	0.000867828	TRUE	TRUE	FALSE	FALSE	BosERV2	-	8
ctg1-6843581-6843674	79.7828	91.0563	65.9077	25.1486	0.00178879	0.0402479	BACH1	3687.93	1.37376	0.000867828	TRUE	FALSE	TRUE	FALSE	BosERV19	+	4
ctg1-6851980-6852090	46.7399	39.0592	56.0615	-17.0023	0.00212864	0.0436811	BACH1	3687.93	1.37376	0.000867828	TRUE	FALSE	TRUE	FALSE	BosERV19	-	5
ctg1-68544121-68544312	91.5764	96.0854	86.0269	10.0585	0.0012329	0.0343076	KALRN	45.2481	-1.70607	0.00197595	TRUE	FALSE	TRUE	FALSE	BosERV12	+	3
ctg1-68975081-68975294	75.0563	82.5875	65.7872	16.8003	0.00149782	0.0369542	KALRN	45.2481	-1.70607	0.00197595	TRUE	FALSE	TRUE	FALSE	BosERV12	+	3
ctg1-6965483-6965677	75.7084	87.5137	61.8327	25.681	0.00103778	0.0316416	LOC104970784	65.5585	2.20613	0.00155162	TRUE	FALSE	TRUE	FALSE	BosERV12	+	3
ctg1-72941589-72941782	88.9695	95.8937	79.7668	16.127	0.00136453	0.0365303	TMEM44	8.38848	-1.63676	0.00723013	TRUE	FALSE	TRUE	FALSE	BosERV12	+	3
ctg1-73887064-73887351	71.887	81.3564	61.29	20.0664	0.00124915	0.0343076	LOC104970904	2.8435	-7.32827	8.93e-05	TRUE	FALSE	TRUE	FALSE	BosERV12	+	6
ctg1-81617562-81617657	69.397	77.1437	59.8625	17.2812	0.000200254	0.0180833	SENP2	946.25	1.01215	0.0152488	TRUE	FALSE	TRUE	FALSE	BosERV12	-	4
ctg1-82627432-82627508	78.175	93.3461	59.5029	33.8432	0.000225856	0.0190715	EPHB3	43.2305	-3.0359	1.21e-05	TRUE	FALSE	TRUE	FALSE	BosERV20	-	4
ctg10-101776327-101776452	82.9606	93.2125	69.4097	23.8028	0.00171346	0.0402479	LOC112448536	23.421	1.62944	0.00239719	TRUE	TRUE	FALSE	FALSE	BosERV19	+	4
ctg10-102361723-102361830	86.6931	96.4625	74.6692	21.7933	0.000571959	0.025158	TTC7B	67.2	-1.49356	0.00561826	TRUE	FALSE	TRUE	FALSE	BosERV11	-	4
ctg10-1031952-1032138	91.9749	96.5296	86.4293	10.1003	0.00095436	0.0316416	DCP2	81.6292	1.16216	2.18e-05	TRUE	FALSE	TRUE	FALSE	BosERV12	-	4
ctg10-14909902-14910091	28.6234	11.1023	49.8346	-38.7323	4.62101e-05	0.013545	PIAS1	3035.31	1.10014	0.00134629	TRUE	FALSE	TRUE	FALSE	BosERV12	+	4
ctg10-14966843-14967095	93.5693	98.1178	87.8135	10.3043	0.000337567	0.0220793	PIAS1	3035.31	1.10014	0.00134629	TRUE	FALSE	TRUE	FALSE	BosERV11	+	3
ctg10-14993161-14993326	61.4734	70.9618	49.7808	21.181	0.00229678	0.0460661	PIAS1	3035.31	1.10014	0.00134629	TRUE	FALSE	TRUE	FALSE	BosERV12	-	3
ctg10-1527144-1527346	78.8737	89.2215	65.5054	23.7161	0.00038477	0.0220793	EPB41L4A	138.311	-3.80041	2.33e-05	TRUE	FALSE	TRUE	FALSE	BosERV12	+	5
ctg10-1676050-1676202	77.1254	83.6488	68.7678	14.881	0.00015926	0.0168702	EPB41L4A	138.311	-3.80041	2.33e-05	TRUE	FALSE	TRUE	FALSE	BosERV20	-	5
ctg10-20067001-20067127	43.9595	34.2999	55.7107	-21.4107	0.00103778	0.0316416	NEO1	88.1344	-3.60039	1.43e-05	TRUE	FALSE	TRUE	FALSE	BosERV12	+	4
ctg10-20067019-20067145	53.1069	44.9425	63.0902	-18.1477	0.000580014	0.025158	NEO1	88.1344	-3.60039	1.43e-05	TRUE	FALSE	TRUE	FALSE	BosERV19	-	5
ctg10-3367171-3367370	73.558	80.3242	66.0795	14.2447	0.00178879	0.0402479	KCNN2	4.89212	-4.66354	0.00877578	TRUE	FALSE	TRUE	FALSE	BosERV12	-	3
ctg10-36384168-36384273	83.2885	94.3719	69.6474	24.7244	0.00230253	0.0460661	SPINT1	178.855	-2.29977	0.000140752	TRUE	FALSE	TRUE	FALSE	BosERV20	-	3
ctg10-4162783-4162934	88.3086	94.2556	80.9892	13.2664	0.00124915	0.0343076	CCDC112	225.809	2.01301	1.44e-05	TRUE	FALSE	TRUE	FALSE	BosERV19	+	5
ctg10-44307889-44308017	88.0119	96.9771	76.5654	20.4117	0.00229356	0.0460661	FRMD6	115.931	-2.18131	0.000170198	TRUE	FALSE	TRUE	FALSE	BosERV20	-	3
ctg10-44556743-44556832	83.3807	94.0714	70.2231	23.8483	0.000707298	0.0271592	FRMD6	115.931	-2.18131	0.000170198	TRUE	FALSE	TRUE	FALSE	BosERV11	-	6
ctg10-46998618-46998889	88.6801	95.2936	80.6872	14.6064	0.000732573	0.0278892	TPM1	904.651	-2.38767	0.000377915	TRUE	FALSE	TRUE	FALSE	BosERV20	-	6
ctg10-47014889-47014931	87.9016	96.1766	76.6722	19.5044	4.8405e-05	0.0136462	TPM1	904.651	-2.38767	0.000377915	TRUE	FALSE	TRUE	FALSE	BosERV20	+	4
ctg10-47718110-47718243	86.5994	91.1031	81.0564	10.0467	0.000311152	0.0207088	TLN2	131.286	-3.86897	6.71e-05	TRUE	FALSE	TRUE	FALSE	BosERV12	-	3
ctg10-52717612-52717696	75.8862	82.5052	67.7397	14.7655	0.00212864	0.0436811	MYZAP	47.073	-3.16336	0.000320524	TRUE	FALSE	TRUE	FALSE	BosERV11	+	3
ctg10-52898242-52898448	78.6718	86.0504	70.3944	15.6559	0.00103778	0.0316416	CGNL1	57.0206	-3.22677	0.000150147	TRUE	FALSE	TRUE	FALSE	BosERV12	+	3
ctg10-60157683-60157943	89.5004	94.1462	83.7756	10.3706	0.000858483	0.0290793	ATP8B4	683.331	1.28229	0.00702541	TRUE	FALSE	TRUE	FALSE	BosERV11	+	6
ctg10-60214389-60214584	48.5879	39.5267	59.3933	-19.8666	0.00178879	0.0402479	ATP8B4	683.331	1.28229	0.00702541	TRUE	FALSE	TRUE	FALSE	BosERV12	+	4
ctg10-61258082-61258270	83.4511	93.1615	71.5	21.6615	0.00247324	0.047363	SHC4	20.0407	-1.9512	0.00826608	TRUE	FALSE	TRUE	FALSE	BosERV12	-	3
ctg10-64987913-64988109	86.5586	93.6156	77.8731	15.7425	0.00117074	0.0343076	LOC101902552	339.51	3.28626	3.26e-05	TRUE	FALSE	TRUE	FALSE	BosERV20	-	3
ctg10-78312571-78312799	86.4256	91.9511	80.0651	11.8861	0.00092863	0.0308531	LOC112448513	7.53135	-7.43857	7.17e-05	TRUE	FALSE	TRUE	FALSE	BosERV12	-	4
ctg10-78336164-78336358	81.9995	87.9621	74.333	13.6291	0.00149782	0.0369542	LOC112448513	7.53135	-7.43857	7.17e-05	TRUE	FALSE	TRUE	FALSE	BosERV12	-	3
ctg10-78355506-78355898	75.3508	87.0565	60.5706	26.4859	0.00235329	0.0470218	LOC112448513	7.53135	-7.43857	7.17e-05	TRUE	FALSE	TRUE	FALSE	BosERV20	+	3
ctg10-79408931-79409066	41.5181	48.3508	33.1087	15.2421	0.00252352	0.047363	PLEKHH1	55.4507	-1.75563	0.00249251	TRUE	FALSE	TRUE	FALSE	BosERV19	-	4
ctg10-79408953-79409164	50.5184	58.5349	40.6519	17.883	0.00103778	0.0316416	PLEKHH1	55.4507	-1.75563	0.00249251	TRUE	FALSE	TRUE	FALSE	BosERV12	-	6
ctg10-79427865-79427963	90.0728	95.26	84.0394	11.2206	0.000676282	0.0271592	PLEKHH1	55.4507	-1.75563	0.00249251	TRUE	FALSE	TRUE	FALSE	BosERV19	-	4
ctg10-81243822-81244175	73.6682	83.8793	61.4048	22.4745	0.000200254	0.0180833	PLEKHD1	35.8667	-2.11696	0.00411322	TRUE	FALSE	FALSE	TRUE	BosERV20	-	6
ctg10-842232-843797	83.337	90.0865	74.7055	15.381	2.67594e-05	0.011936	MCC	58.906	-3.75885	2.39e-05	TRUE	FALSE	TRUE	FALSE	BosERV2	+	24
ctg10-84389047-84389269	86.8096	92.4495	80.5094	11.9401	0.00038477	0.0220793	DPF3	79.0633	-1.05935	0.0379261	TRUE	FALSE	TRUE	FALSE	BosERV12	+	3
ctg10-844791-845577	81.0287	85.9197	74.9395	10.9802	0.000473624	0.0237007	MCC	58.906	-3.75885	2.39e-05	TRUE	FALSE	TRUE	FALSE	BosERV2	+	14
ctg10-845575-846692	83.8398	88.8668	77.5146	11.3522	0.00103778	0.0316416	MCC	58.906	-3.75885	2.39e-05	TRUE	FALSE	TRUE	FALSE	BosERV2	+	5
ctg10-87759119-87759338	77.9319	87.1312	65.8733	21.258	0.00149782	0.0369542	ESRRB	8.62888	-4.58051	0.000148333	TRUE	FALSE	TRUE	FALSE	BosERV12	+	3
ctg10-88019463-88019603	83.9491	89.6367	76.949	12.6877	0.00124915	0.0343076	VASH1	848.695	1.01374	0.0300628	TRUE	FALSE	TRUE	FALSE	BosERV19	+	4
ctg10-92569233-92569621	71.2602	76.7411	64.4425	12.2986	9.90217e-05	0.0154941	STON2	1060.67	-2.17927	3.96e-05	TRUE	FALSE	TRUE	FALSE	BosERV20	-	6
ctg10-92578496-92578811	81.2043	86.3083	74.6982	11.6101	0.000858436	0.0290793	STON2	1060.67	-2.17927	3.96e-05	TRUE	FALSE	TRUE	FALSE	BosERV20	+	6
ctg10-92715909-92716004	18.4735	7.11434	32.055	-24.9407	0.00124915	0.0343076	STON2	1060.67	-2.17927	3.96e-05	TRUE	FALSE	TRUE	FALSE	BosERV11	-	6
ctg11-100501328-100501542	88.1263	94.7482	80.4852	14.263	0.00225547	0.0457332	NCS1	21.8033	-1.5854	0.000826909	TRUE	FALSE	TRUE	FALSE	BosERV11	-	4
ctg11-101747403-101747619	88.0689	95.5803	78.3416	17.2387	0.000567478	0.025158	RAPGEF1	7377.91	1.37465	0.00129921	TRUE	TRUE	FALSE	FALSE	BosERV12	-	4
ctg11-103996486-103996672	81.2523	93.9533	66.0523	27.901	0.000126017	0.015996	LOC112448856	47.3695	1.49894	0.0193554	TRUE	TRUE	FALSE	FALSE	BosERV12	+	5
ctg11-104207414-104207556	81.3266	91.9652	68.1538	23.8114	2.67594e-05	0.011936	ABO	85.8964	-1.67605	0.00193502	TRUE	TRUE	FALSE	FALSE	BosERV20	-	3
ctg11-104207432-104207642	81.3266	91.9652	68.1538	23.8114	2.67594e-05	0.011936	ABO	85.8964	-1.67605	0.00193502	TRUE	TRUE	FALSE	FALSE	BosERV12	-	3
ctg11-104210907-104211108	83.7237	89.2298	76.6518	12.5779	0.00261477	0.0488774	ABO	85.8964	-1.67605	0.00193502	TRUE	TRUE	FALSE	FALSE	BosERV12	-	8
ctg11-10506250-10506446	89.9172	95.4119	83.1546	12.2573	0.00124915	0.0343076	BOLA3	71.0228	-1.14116	0.00095603	TRUE	FALSE	TRUE	FALSE	BosERV12	+	5
ctg11-105068104-105068482	86.9945	94.9103	77.1952	17.7151	1.09926e-05	0.0110846	RXRA	3806.83	1.09891	0.00486927	TRUE	FALSE	TRUE	FALSE	BosERV20	-	10
ctg11-10604876-10605072	86.0576	93.4669	78.3686	15.0983	0.00252352	0.047363	TET3	1062.08	1.24895	0.000185831	TRUE	FALSE	TRUE	FALSE	BosERV12	-	7
ctg11-106185466-106185663	81.1264	89.6021	70.6949	18.9072	0.000311152	0.0207088	GRIN1	10.5798	-1.09625	0.0427261	TRUE	FALSE	TRUE	FALSE	BosERV12	+	3
ctg11-1310576-1310746	87.0701	93.249	79.4654	13.7836	0.00015926	0.0168702	ACOXL	24.4189	1.95979	0.000242311	TRUE	FALSE	TRUE	FALSE	BosERV12	-	3
ctg11-1403467-1403832	85.8341	93.919	76.1877	17.7313	0.00252352	0.047363	ACOXL	24.4189	1.95979	0.000242311	TRUE	FALSE	TRUE	FALSE	BosERV20	-	5
ctg11-14892056-14892204	90.6901	96.2272	83.9768	12.2505	0.000782573	0.0290793	YIPF4	1610.64	1.22783	0.000642787	TRUE	FALSE	TRUE	FALSE	BosERV19	-	4
ctg11-15550259-15550464	87.0188	92.5727	79.8508	12.722	0.00038477	0.0220793	LTBP1	87.4741	-2.85789	8.72e-05	TRUE	FALSE	TRUE	FALSE	BosERV12	+	6
ctg11-15575486-15575867	82.7981	90.4261	73.0755	17.3506	0.000126017	0.015996	LTBP1	87.4741	-2.85789	8.72e-05	TRUE	FALSE	TRUE	FALSE	BosERV20	-	5
ctg11-24542043-24542168	91.0207	95.9865	84.909	11.0775	0.00265874	0.0490488	LOC112448762	40.8142	1.27719	0.0279046	TRUE	FALSE	TRUE	FALSE	BosERV11	-	3
ctg11-24556582-24556752	28.1397	13.8742	45.6971	-31.8229	4.62101e-05	0.013545	LOC112448762	40.8142	1.27719	0.0279046	TRUE	TRUE	FALSE	FALSE	BosERV12	-	4
ctg11-29572328-29572456	88.2101	97.3338	77.35	19.9838	0.000148393	0.0168702	STPG4	35.4852	1.34324	0.00507553	TRUE	FALSE	TRUE	FALSE	BosERV20	+	5
ctg11-37629473-37629648	88.3375	95.9244	79.5833	16.3411	0.00157641	0.038626	EML6	10.255	-1.78928	0.0292228	TRUE	FALSE	TRUE	FALSE	BosERV12	+	3
ctg11-37704920-37705053	77.6307	91.0383	61.3685	29.6698	0.000250236	0.0190715	EML6	10.255	-1.78928	0.0292228	TRUE	FALSE	TRUE	FALSE	BosERV12	+	5
ctg11-44377708-44377855	81.5574	92.0893	68.4738	23.6155	0.00103778	0.0316416	SH3RF3	21.4151	-2.35483	3.3e-07	TRUE	FALSE	TRUE	FALSE	BosERV20	-	5
ctg11-49735168-49735506	83.6517	88.4336	77.5402	10.8934	0.00015926	0.0168702	TCF7L1	34.0816	-2.32422	0.000418559	TRUE	FALSE	TRUE	FALSE	BosERV20	-	5
ctg11-6062789-6063154	68.8914	76.3011	60.2505	16.0507	0.000580014	0.025158	TBC1D8	464.155	1.01886	0.0109539	TRUE	FALSE	TRUE	FALSE	BosERV20	-	6
ctg11-6063073-6063166	58.3188	67.1129	48.3325	18.7803	0.00198806	0.0434352	TBC1D8	464.155	1.01886	0.0109539	TRUE	FALSE	TRUE	FALSE	BosERV12	-	4
ctg11-6439902-6440103	87.8746	95.5717	78.6731	16.8986	0.00100411	0.0316416	LOC107132901	83.7812	3.20724	0.000355534	TRUE	FALSE	TRUE	FALSE	BosERV12	+	6
ctg11-6443584-6443740	19.4864	8.22255	33.2154	-24.9928	0.000311152	0.0207088	LOC107132901	83.7812	3.20724	0.000355534	TRUE	TRUE	FALSE	FALSE	BosERV20	+	4
ctg11-6717102-6717289	78.7203	89.2773	65.7269	23.5504	0.000311152	0.0207088	IL1R2	571.577	3.05776	8.19e-06	TRUE	FALSE	TRUE	FALSE	BosERV12	+	4
ctg11-6727875-6728075	86.2721	94.2891	75.7209	18.5681	0.000413947	0.0231235	IL1R2	571.577	3.05776	8.19e-06	TRUE	FALSE	TRUE	FALSE	BosERV20	+	5
ctg11-71980405-71980621	80.2869	90.5745	67.2702	23.3043	0.00178879	0.0402479	LOC101905151	81.7117	-3.27805	2.01e-05	TRUE	TRUE	FALSE	FALSE	BosERV12	+	3
ctg11-71980536-71980608	80.2869	90.5745	67.2702	23.3043	0.00178879	0.0402479	LOC101905151	81.7117	-3.27805	2.01e-05	TRUE	TRUE	FALSE	FALSE	BosERV12	-	3
ctg11-7386789-7386881	74.0615	83.9554	61.3957	22.5597	0.000707298	0.0271592	SLC9A2	1.9954	-2.73885	0.0371602	TRUE	FALSE	TRUE	FALSE	BosERV19	+	3
ctg11-86157148-86157279	78.3483	86.9885	67.7141	19.2744	0.00149782	0.0369542	LPIN1	639.921	-2.37097	0.000611077	TRUE	FALSE	TRUE	FALSE	BosERV12	-	3
ctg11-86170786-86171076	75.2442	80.7246	68.8368	11.8877	0.000311152	0.0207088	LPIN1	639.921	-2.37097	0.000611077	TRUE	FALSE	TRUE	FALSE	BosERV20	+	3
ctg11-86186843-86187052	85.2198	90.4133	78.9994	11.4139	0.00202323	0.0436811	LPIN1	639.921	-2.37097	0.000611077	TRUE	FALSE	TRUE	FALSE	BosERV12	-	6
ctg11-86723986-86724407	77.9867	88.0114	65.9339	22.0775	0.00038477	0.0220793	LOC101904759	6.36672	-4.0364	0.00432171	TRUE	FALSE	TRUE	FALSE	BosERV10	+	9
ctg11-86724852-86725048	81.1822	91.101	68.9744	22.1267	0.0017112	0.0402479	LOC101904759	6.36672	-4.0364	0.00432171	TRUE	FALSE	TRUE	FALSE	BosERV12	+	3
ctg11-86729885-86729998	82.3844	95.2715	69.2923	25.9792	0.000113027	0.015996	LOC101904759	6.36672	-4.0364	0.00432171	TRUE	FALSE	TRUE	FALSE	BosERV12	+	5
ctg11-86729903-86730034	82.9873	95.726	69.9923	25.7337	5.92734e-05	0.0136462	LOC101904759	6.36672	-4.0364	0.00432171	TRUE	FALSE	TRUE	FALSE	BosERV19	-	4
ctg11-87602149-87602358	77.9874	92.0104	60.7282	31.2822	7.73607e-05	0.0146299	GRHL1	134.188	-2.53901	0.000819233	TRUE	FALSE	TRUE	FALSE	BosERV12	+	3
ctg11-9593815-9593943	76.6935	88.0766	62.6837	25.3929	2.00696e-05	0.0117801	TACR1	10.4001	-4.30364	0.00170264	TRUE	FALSE	TRUE	FALSE	BosERV20	-	4
ctg11-97174958-97175165	88.488	94.3375	81.1389	13.1986	0.000731465	0.0278892	MVB12B	168.038	-1.07419	0.0109845	TRUE	FALSE	TRUE	FALSE	BosERV12	-	3
ctg11-97720600-97720685	38.039	25.4911	54.8452	-29.3541	0.000229868	0.0190715	RALGPS1	74.9779	-1.02764	0.00295923	TRUE	FALSE	TRUE	FALSE	BosERV20	-	3
ctg11-97720623-97720853	55.7201	47.7907	66.2643	-18.4735	0.000669587	0.0271592	RALGPS1	74.9779	-1.02764	0.00295923	TRUE	FALSE	TRUE	FALSE	BosERV20	+	6
ctg11-97931818-97931852	87.0797	95.625	76.5623	19.0627	0.0013664	0.0365303	RALGPS1	74.9779	-1.02764	0.00295923	TRUE	FALSE	TRUE	FALSE	BosERV11	+	5
ctg11-99396741-99396892	81.1468	94.0494	64.4908	29.5586	0.000126017	0.015996	LRRC8A	473.767	-1.24281	2.69e-08	TRUE	FALSE	TRUE	FALSE	BosERV11	-	5
ctg12-25496034-25496150	72.3385	83.2021	58.9679	24.2341	0.000126017	0.015996	DCLK1	100.242	-2.90527	1.71e-06	TRUE	FALSE	TRUE	FALSE	BosERV20	+	3
ctg12-25667742-25667915	23.4849	9.33062	41.4021	-32.0714	0.000473624	0.0237007	DCLK1	100.242	-2.90527	1.71e-06	TRUE	FALSE	TRUE	FALSE	BosERV19	+	5
ctg12-33776838-33777118	88.0954	93.0918	81.9564	11.1354	0.00103778	0.0316416	ATP8A2	18.8794	-1.04055	0.0464068	TRUE	FALSE	TRUE	FALSE	BosERV20	-	6
ctg12-33823177-33823419	87.944	95.6504	78.0907	17.5597	0.000580014	0.025158	ATP8A2	18.8794	-1.04055	0.0464068	TRUE	FALSE	TRUE	FALSE	BosERV6	-	7
ctg12-33825008-33825313	86.3431	94.8949	76.1951	18.6999	4.03782e-05	0.013545	ATP8A2	18.8794	-1.04055	0.0464068	TRUE	FALSE	TRUE	FALSE	BosERV6	+	3
ctg12-39806315-39806713	66.0849	72.1976	58.6417	13.5559	0.000858483	0.0290793	PCDH9	21.4764	-1.52246	0.0129503	TRUE	FALSE	TRUE	FALSE	BosERV20	-	3
ctg12-39936969-39937282	65.6611	72.8732	57.1779	15.6953	0.00149782	0.0369542	PCDH9	21.4764	-1.52246	0.0129503	TRUE	FALSE	TRUE	FALSE	BosERV20	+	4
ctg12-40042779-40042916	84.9574	91.095	77.609	13.486	0.000858483	0.0290793	PCDH9	21.4764	-1.52246	0.0129503	TRUE	FALSE	TRUE	FALSE	BosERV20	-	3
ctg12-40165312-40165505	86.4109	91.3656	80.3128	11.0528	0.000311152	0.0207088	PCDH9	21.4764	-1.52246	0.0129503	TRUE	FALSE	TRUE	FALSE	BosERV12	-	3
ctg12-40482419-40482627	84.8168	93.1631	74.8202	18.3429	0.000200254	0.0180833	PCDH9	21.4764	-1.52246	0.0129503	TRUE	FALSE	TRUE	FALSE	BosERV12	-	4
ctg12-46081100-46081292	87.3321	94.8677	78.4729	16.3948	0.000350963	0.0220793	DACH1	45.0978	1.98258	0.0104091	TRUE	FALSE	TRUE	FALSE	BosERV12	+	6
ctg12-50795557-50795758	85.9447	91.3646	79.2217	12.1429	0.00178879	0.0402479	LMO7	343.766	-3.1717	2.44e-05	TRUE	FALSE	TRUE	FALSE	BosERV12	+	4
ctg12-5113396-5113622	71.5355	79.6789	62.3591	17.3198	4.62101e-05	0.013545	PCDH17	49.1788	-2.54846	3.78e-05	TRUE	FALSE	TRUE	FALSE	BosERV12	+	5
ctg12-75162685-75162779	81.1816	90.4052	69.8295	20.5757	0.00178879	0.0402479	FARP1	84.9814	-2.11122	0.000190874	TRUE	FALSE	TRUE	FALSE	BosERV12	-	3
ctg12-75163685-75163806	50.9868	60.0375	39.8474	20.1901	0.00178879	0.0402479	FARP1	84.9814	-2.11122	0.000190874	TRUE	FALSE	TRUE	FALSE	BosERV19	+	3
ctg12-75299613-75299809	85.5989	92.3542	77.2846	15.0696	2.67594e-05	0.011936	FARP1	84.9814	-2.11122	0.000190874	TRUE	FALSE	TRUE	FALSE	BosERV12	+	3
ctg12-75299744-75299821	80.0782	89.6281	68.3244	21.3038	8.01604e-06	0.0103358	FARP1	84.9814	-2.11122	0.000190874	TRUE	FALSE	TRUE	FALSE	BosERV12	-	3
ctg12-84953685-84953871	76.5536	87.1551	63.3572	23.7979	0.000858483	0.0290793	COL4A1	53.8828	-2.93114	0.00273941	TRUE	FALSE	TRUE	FALSE	BosERV11	-	8
ctg12-84953803-84953886	73.7134	87.0312	57.3221	29.7091	0.00038477	0.0220793	COL4A1	53.8828	-2.93114	0.00273941	TRUE	FALSE	TRUE	FALSE	BosERV20	+	4
ctg13-12993969-12994226	86.3968	92.8904	78.3252	14.5652	0.00124915	0.0343076	CELF2	143.871	1.19296	6.07e-05	TRUE	FALSE	TRUE	FALSE	BosERV20	-	6
ctg13-12994155-12994241	86.292	94.2656	76.4782	17.7874	0.000732573	0.0278892	CELF2	143.871	1.19296	6.07e-05	TRUE	FALSE	TRUE	FALSE	BosERV12	-	3
ctg13-13054163-13054375	91.8332	96.4719	85.8834	10.5885	0.00105618	0.0321526	CELF2	143.871	1.19296	6.07e-05	TRUE	FALSE	TRUE	FALSE	BosERV12	+	5
ctg13-13134793-13134986	78.9181	91.2062	63.7942	27.412	5.9973e-05	0.0136462	CELF2	143.871	1.19296	6.07e-05	TRUE	FALSE	TRUE	FALSE	BosERV12	-	4
ctg13-17125213-17125480	91.152	95.8207	85.4528	10.3679	4.62101e-05	0.013545	PFKFB3	6855.78	1.02854	0.0417902	TRUE	FALSE	TRUE	FALSE	BosERV20	-	9
ctg13-17326537-17326626	19.3201	7.52292	33.8397	-26.3168	0.000486604	0.0239265	PFKFB3	6855.78	1.02854	0.0417902	TRUE	FALSE	TRUE	FALSE	BosERV20	+	3
ctg13-17344509-17344624	29.2109	9.48926	52.2683	-42.779	0.00126597	0.0343076	PFKFB3	6855.78	1.02854	0.0417902	TRUE	FALSE	TRUE	FALSE	BosERV20	-	4
ctg13-17472290-17472511	84.9466	95.949	71.4051	24.5438	0.000147279	0.0168702	IL2RA	595.383	1.82953	0.000273841	TRUE	FALSE	TRUE	FALSE	BosERV12	+	3
ctg13-17526847-17526944	25.4609	7.53229	47.5269	-39.9946	0.0017067	0.0402479	IL15RA	175.299	1.80763	0.00074251	TRUE	FALSE	TRUE	FALSE	BosERV20	+	3
ctg13-22240085-22240284	79.9086	89.0472	68.2375	20.8097	0.000250236	0.0190715	NEBL	632.503	-4.63635	1.71e-06	TRUE	FALSE	TRUE	FALSE	BosERV12	-	9
ctg13-22439030-22439236	82.3596	90.3575	72.7833	17.5742	3.52765e-05	0.0127862	NEBL	632.503	-4.63635	1.71e-06	TRUE	FALSE	TRUE	FALSE	BosERV12	-	3
ctg13-25066069-25066227	74.287	86.5332	58.4921	28.0411	0.00101178	0.0316416	LOC104973739	5.85233	-3.5709	0.00739038	TRUE	TRUE	FALSE	FALSE	BosERV12	-	5
ctg13-25070813-25070929	76.4143	91.4875	57.3749	34.1126	1.09926e-05	0.0110846	LOC104973739	5.85233	-3.5709	0.00739038	TRUE	TRUE	FALSE	FALSE	BosERV12	+	3
ctg13-25207935-25208134	72.0714	78.156	64.8705	13.2855	0.00124915	0.0343076	KIAA1217	203.586	-3.32301	6.49e-06	TRUE	FALSE	TRUE	FALSE	BosERV12	-	3
ctg13-25237145-25237340	84.1224	89.0637	78.0408	11.023	0.00252352	0.047363	KIAA1217	203.586	-3.32301	6.49e-06	TRUE	FALSE	TRUE	FALSE	BosERV12	-	5
ctg13-25336048-25336225	81.9647	91.9609	69.6615	22.2994	2.67594e-05	0.011936	KIAA1217	203.586	-3.32301	6.49e-06	TRUE	FALSE	TRUE	FALSE	BosERV11	-	6
ctg13-32436126-32436216	84.4667	93.1802	73.7423	19.4379	0.000311152	0.0207088	SLC39A12	10.4337	-4.41019	0.000705422	TRUE	FALSE	TRUE	FALSE	BosERV11	-	3
ctg13-35089328-35089438	88.7251	93.6977	81.8458	11.8518	0.00149926	0.0369542	JCAD	31.9266	-1.26174	0.0228118	TRUE	FALSE	TRUE	FALSE	BosERV11	+	4
ctg13-37953412-37953718	81.5274	88.602	72.8202	15.7818	7.73607e-05	0.0146299	DSTN	288.323	-2.21032	5.66e-06	TRUE	FALSE	FALSE	TRUE	BosERV12	+	8
ctg13-38554130-38554331	60.7151	65.5977	54.7058	10.8919	0.00124915	0.0343076	RBBP9	68.3338	-1.19159	0.000129848	TRUE	FALSE	TRUE	FALSE	BosERV12	+	4
ctg13-51221060-51221192	81.3905	95.2603	65.5369	29.7234	0.00082636	0.0290793	RNF24	605.016	1.55163	0.00366384	TRUE	FALSE	TRUE	FALSE	BosERV19	-	3
ctg13-61258858-61258976	82.5168	95.1188	67.0067	28.112	0.000245712	0.0190715	BCL2L1	1225.68	1.03341	0.00810104	TRUE	FALSE	TRUE	FALSE	BosERV20	+	4
ctg13-64192815-64193023	92.3673	97.2633	86.5006	10.7626	0.000130715	0.0165646	ACSS2	1578.66	-3.31762	2.19e-05	TRUE	FALSE	TRUE	FALSE	BosERV12	-	3
ctg13-64256132-64256337	88.5119	95.0092	80.2823	14.7269	0.000311152	0.0207088	GSS	217.28	-1.21741	0.00110587	TRUE	FALSE	TRUE	FALSE	BosERV12	+	7
ctg13-64256253-64256347	81.9799	92.4938	69.0397	23.454	0.00015926	0.0168702	GSS	217.28	-1.21741	0.00110587	TRUE	FALSE	TRUE	FALSE	BosERV19	+	3
ctg13-64512344-64512409	67.5718	77.7854	55.0013	22.7841	0.00171346	0.0402479	MMP24	1.98392	-2.50506	0.031914	TRUE	FALSE	TRUE	FALSE	BosERV19	+	3
ctg13-64512351-64512551	67.5718	77.7854	55.0013	22.7841	0.00171346	0.0402479	MMP24	1.98392	-2.50506	0.031914	TRUE	FALSE	TRUE	FALSE	BosERV12	-	3
ctg13-64538169-64538358	84.6082	96.3148	70.2	26.1148	0.000924575	0.0308531	MMP24	1.98392	-2.50506	0.031914	TRUE	FALSE	TRUE	FALSE	BosERV12	+	4
ctg13-65243665-65243873	83.8569	94.1552	71.1821	22.9732	0.00015926	0.0168702	EPB41L1	129.285	-2.77647	0.000100719	TRUE	FALSE	TRUE	FALSE	BosERV12	+	3
ctg13-6664187-6664399	73.144	82.193	62.0067	20.1862	0.00015926	0.0168702	SPTLC3	322.115	-4.26542	3.54e-05	TRUE	FALSE	TRUE	FALSE	BosERV12	-	4
ctg13-67025964-67026016	14.2414	6.90521	23.6842	-16.779	0.00211301	0.0436811	TGM2	973.341	1.46267	0.00347591	TRUE	FALSE	TRUE	FALSE	BosERV20	+	3
ctg13-67025978-67026018	14.2414	6.90521	23.6842	-16.779	0.00211301	0.0436811	TGM2	973.341	1.46267	0.00347591	TRUE	FALSE	TRUE	FALSE	BosERV20	-	3
ctg13-6739828-6739916	55.7687	61.0664	49.3254	11.741	0.000707298	0.0271592	SPTLC3	322.115	-4.26542	3.54e-05	TRUE	FALSE	TRUE	FALSE	BosERV20	-	5
ctg13-71684512-71684593	39.4196	34.0115	46.1754	-12.1639	0.00124915	0.0343076	PTPRT	39.2904	-2.13135	0.0438496	TRUE	FALSE	TRUE	FALSE	BosERV19	-	3
ctg13-71846652-71846798	81.6359	90.2978	70.5462	19.7516	0.000126017	0.015996	PTPRT	39.2904	-2.13135	0.0438496	TRUE	FALSE	TRUE	FALSE	BosERV12	+	7
ctg13-76221428-76221527	84.9925	93.2365	74.8462	18.3903	9.90217e-05	0.0154941	SULF2	479.577	-1.33378	0.0335769	TRUE	FALSE	TRUE	FALSE	BosERV12	-	3
ctg13-76221457-76221544	84.9925	93.2365	74.8462	18.3903	9.90217e-05	0.0154941	SULF2	479.577	-1.33378	0.0335769	TRUE	FALSE	TRUE	FALSE	BosERV11	+	3
ctg13-77535986-77536187	79.4634	91.815	64.2615	27.5535	2.85866e-06	0.00843159	KCNB1	21.5421	-1.79358	0.0292471	TRUE	FALSE	TRUE	FALSE	BosERV12	+	5
ctg13-78361058-78361149	76.7243	88.992	62.5692	26.4228	3.63761e-05	0.0131243	LOC112449348	7.30492	3.06759	0.00417453	TRUE	FALSE	TRUE	FALSE	BosERV12	-	5
ctg13-78441147-78441338	84.6613	92.4929	75.1644	17.3285	9.90217e-05	0.0154941	LOC101907588	8.15196	1.35677	0.0322422	TRUE	FALSE	TRUE	FALSE	BosERV12	-	4
ctg14-15041748-15041872	89.3254	94.9742	82.3731	12.6011	0.00146817	0.0369542	NSMCE2	167.028	1.15529	0.00137019	TRUE	FALSE	TRUE	FALSE	BosERV20	-	4
ctg14-25992016-25992355	82.9155	88.5647	75.5027	13.062	0.000580014	0.025158	CA8	150.311	-3.18195	0.000258076	TRUE	FALSE	TRUE	FALSE	BosERV20	-	7
ctg14-26014553-26015009	79.3801	91.9062	63.7691	28.137	2.00696e-05	0.0117801	CA8	150.311	-3.18195	0.000258076	TRUE	FALSE	TRUE	FALSE	BosERV6	+	7
ctg14-38160750-38160861	79.8019	92.8231	66.7808	26.0423	0.000330225	0.0217228	PI15	55.8041	-4.03881	0.000179795	TRUE	FALSE	TRUE	FALSE	BosERV19	-	4
ctg14-38160772-38160968	78.1867	90.2229	64.6978	25.5251	7.73607e-05	0.0146299	PI15	55.8041	-4.03881	0.000179795	TRUE	FALSE	TRUE	FALSE	BosERV12	-	7
ctg14-45787130-45787326	74.7636	84.5365	62.5137	22.0228	0.000414629	0.0231235	SAMD12	267.807	-3.55859	0.000103635	TRUE	FALSE	TRUE	FALSE	BosERV12	-	3
ctg14-45906144-45906228	84.9052	92.1508	75.9875	16.1633	0.000250236	0.0190715	SAMD12	267.807	-3.55859	0.000103635	TRUE	FALSE	TRUE	FALSE	BosERV19	+	4
ctg14-45968089-45968353	73.7303	82.2177	63.4916	18.7261	0.000473624	0.0237007	SAMD12	267.807	-3.55859	0.000103635	TRUE	FALSE	TRUE	FALSE	BosERV12	-	4
ctg14-60740309-60742111	89.7565	94.5071	84.3425	10.1646	2.00696e-05	0.0117801	RIMS2	7.89029	-3.60774	0.00167929	TRUE	FALSE	TRUE	FALSE	BosERV2	+	14
ctg14-66360640-66360829	82.1226	92.1769	69.594	22.5829	0.000858483	0.0290793	MATN2	5.18344	-2.53298	0.0269543	TRUE	FALSE	FALSE	TRUE	BosERV12	-	5
ctg14-67655333-67655532	81.3086	88.2625	72.75	15.5125	9.48551e-05	0.0154941	SDC2	395.744	-5.74683	2.11e-07	TRUE	FALSE	TRUE	FALSE	BosERV12	+	6
ctg14-67691327-67691510	82.6577	89.5524	74.1201	15.4322	8.01604e-06	0.0103358	SDC2	395.744	-5.74683	2.11e-07	TRUE	FALSE	TRUE	FALSE	BosERV11	+	7
ctg14-81722387-81722527	32.1707	24.3086	41.8471	-17.5385	0.00108524	0.0324592	COL14A1	124.774	-1.58322	0.00229311	TRUE	FALSE	TRUE	FALSE	BosERV12	+	4
ctg14-81902799-81903104	89.491	95.3671	82.2218	13.1453	4.62101e-05	0.013545	SNTB1	590.241	-1.97694	0.00375417	TRUE	FALSE	TRUE	FALSE	BosERV20	-	7
ctg14-81995140-81995304	87.7487	95.7448	78.2433	17.5015	0.000575562	0.025158	SNTB1	590.241	-1.97694	0.00375417	TRUE	FALSE	TRUE	FALSE	BosERV12	-	4
ctg14-82074363-82074514	75.1297	90.4423	56.9812	33.4611	0.00212864	0.0436811	SNTB1	590.241	-1.97694	0.00375417	TRUE	FALSE	TRUE	FALSE	BosERV12	+	5
ctg14-82076269-82076599	86.8829	93.2405	78.9972	14.2433	9.90217e-05	0.0154941	SNTB1	590.241	-1.97694	0.00375417	TRUE	FALSE	TRUE	FALSE	BosERV20	-	7
ctg15-13979405-13979499	88.4697	97.073	77.739	19.3339	0.000170804	0.0179282	MAML2	2473.18	1.77288	0.000218498	TRUE	FALSE	TRUE	FALSE	BosERV12	+	4
ctg15-14093558-14093664	89.2055	97.0211	79.5135	17.5077	0.000246148	0.0190715	MAML2	2473.18	1.77288	0.000218498	TRUE	TRUE	FALSE	FALSE	BosERV19	+	4
ctg15-14149565-14149763	89.1605	97.2812	79.7907	17.4905	0.000757589	0.0287766	MAML2	2473.18	1.77288	0.000218498	TRUE	TRUE	FALSE	FALSE	BosERV12	-	5
ctg15-28528427-28528660	87.2471	93.9584	79.111	14.8474	5.9973e-05	0.0136462	FXYD6	297.917	-1.24765	0.0279381	TRUE	TRUE	TRUE	FALSE	BosERV20	-	7
ctg15-31196743-31196859	79.9615	88.2082	70.9284	17.2798	0.000376671	0.0220793	GRIK4	4.30319	-3.63135	0.0247922	TRUE	FALSE	TRUE	FALSE	BosERV12	-	3
ctg15-31426569-31426665	87.4398	93.69	79.9655	13.7245	0.00212864	0.0436811	GRIK4	4.30319	-3.63135	0.0247922	TRUE	FALSE	TRUE	FALSE	BosERV19	+	3
ctg15-45116274-45116454	27.092	14.1781	42.9859	-28.8078	0.000250236	0.0190715	PPFIBP2	115.003	-1.60416	0.000370477	TRUE	FALSE	TRUE	FALSE	BosERV12	-	3
ctg15-45128770-45128833	77.696	88.8219	64.0026	24.8193	0.000530614	0.025158	PPFIBP2	115.003	-1.60416	0.000370477	TRUE	FALSE	TRUE	FALSE	BosERV19	-	6
ctg15-46237082-46237277	84.0865	90.2382	76.7583	13.4799	0.00212864	0.0436811	LOC101903126	385.015	1.18583	0.0114569	TRUE	TRUE	FALSE	FALSE	BosERV12	+	4
ctg15-46342389-46342576	86.324	91.799	79.7269	12.072	0.000473624	0.0237007	LOC783920	1161.06	1.49953	0.000922245	TRUE	FALSE	TRUE	FALSE	BosERV12	+	3
ctg15-53123410-53123496	84.6454	93.3415	73.4658	19.8756	0.00108061	0.0324592	PLEKHB1	25.3261	-2.23401	0.00876336	TRUE	FALSE	TRUE	FALSE	BosERV11	+	3
ctg15-63532849-63533038	64.7072	70.862	57.3423	13.5197	0.00252352	0.047363	PRRG4	62.9743	-3.28681	0.00017557	TRUE	TRUE	FALSE	FALSE	BosERV12	-	4
ctg15-65041409-65041559	81.5082	91.15	69.6413	21.5087	0.000707298	0.0271592	ELF5	5075.41	-5.20331	3.57e-07	TRUE	FALSE	TRUE	FALSE	BosERV19	-	4
ctg15-65042838-65043045	85.9902	95.7365	74.6686	21.0679	0.000672149	0.0271592	ELF5	5075.41	-5.20331	3.57e-07	TRUE	FALSE	TRUE	FALSE	BosERV12	-	4
ctg15-65204777-65205098	80.7859	91.2967	67.7987	23.498	5.9973e-05	0.0136462	EHF	2357.8	-3.75051	1.3e-05	TRUE	FALSE	TRUE	FALSE	BosERV12	+	5
ctg15-65207691-65207809	73.6126	88.3542	55.4692	32.8849	0.000473624	0.0237007	EHF	2357.8	-3.75051	1.3e-05	TRUE	FALSE	TRUE	FALSE	BosERV20	-	3
ctg15-65823921-65824005	88.8929	96.626	78.8538	17.7722	0.00124849	0.0343076	SLC1A2	310.373	-2.86302	0.000968305	TRUE	FALSE	TRUE	FALSE	BosERV11	+	3
ctg15-65910924-65911085	65.4672	73.674	55.3667	18.3073	0.000126017	0.015996	SLC1A2	310.373	-2.86302	0.000968305	TRUE	FALSE	TRUE	FALSE	BosERV12	-	3
ctg15-66216434-66216650	80.4117	87.7917	71.5023	16.2894	0.000473624	0.0237007	TRIM44	31.8383	-2.07671	0.0019457	TRUE	FALSE	TRUE	FALSE	BosERV12	+	5
ctg15-6636184-6636277	76.3736	90.425	59.0795	31.3455	4.62101e-05	0.013545	YAP1	261.323	-2.77921	4.9e-05	TRUE	FALSE	FALSE	TRUE	BosERV19	-	3
ctg15-6636208-6636569	76.292	87.1055	63.4405	23.665	0.000200254	0.0180833	YAP1	261.323	-2.77921	4.9e-05	TRUE	FALSE	FALSE	TRUE	BosERV20	+	8
ctg15-70840778-70840982	70.2205	75.3654	64.5152	10.8502	0.000580014	0.025158	LRRC4C	7.04824	-2.47005	0.016537	TRUE	FALSE	TRUE	FALSE	BosERV12	-	4
ctg15-71374999-71375112	71.961	76.3333	66.0212	10.3121	0.00103778	0.0316416	LRRC4C	7.04824	-2.47005	0.016537	TRUE	FALSE	TRUE	FALSE	BosERV12	+	3
ctg15-77510502-77510636	58.1563	64.0505	50.9019	13.1486	0.000707298	0.0271592	FNBP4	2919.31	1.31969	0.00124577	TRUE	FALSE	TRUE	FALSE	BosERV12	-	6
ctg15-77772632-77772728	84.0695	92.5786	73.5434	19.0353	0.00178879	0.0402479	PTPRJ	11878	1.74718	0.00032785	TRUE	FALSE	TRUE	FALSE	BosERV12	-	6
ctg15-77804459-77804585	51.5384	44.9609	59.6337	-14.6727	0.00015926	0.0168702	PTPRJ	11878	1.74718	0.00032785	TRUE	FALSE	TRUE	FALSE	BosERV20	-	4
ctg15-7882226-7882308	83.6798	94.3932	69.0015	25.3917	8.66152e-05	0.0154941	PGR	34.6273	-5.54259	2.78e-07	TRUE	FALSE	TRUE	FALSE	BosERV12	-	4
ctg15-82116493-82116945	70.5228	78.0094	61.3085	16.7009	0.00149782	0.0369542	GAT	2.63448	-3.66565	0.0172805	TRUE	FALSE	TRUE	FALSE	BosERV6	-	5
ctg15-8217870-8218076	74.4931	90.2741	56.1809	34.0932	0.000250236	0.0190715	ARHGAP42	115.81	-2.05181	0.00498815	TRUE	FALSE	TRUE	FALSE	BosERV12	-	5
ctg15-83554448-83554536	69.8365	84.8	50.1528	34.6472	4.09643e-06	0.00863027	LOC613282	3.05334	-6.49326	0.00139014	TRUE	TRUE	FALSE	TRUE	BosERV19	+	3
ctg16-1406463-1406563	90.2968	98.0687	80.6323	17.4365	0.000655793	0.0271592	ATP2B4	1716.6	-1.46121	5.52e-05	TRUE	FALSE	TRUE	FALSE	BosERV12	-	3
ctg16-1417408-1417543	86.8748	94.8487	77.0608	17.788	0.00124915	0.0343076	ATP2B4	1716.6	-1.46121	5.52e-05	TRUE	FALSE	TRUE	FALSE	BosERV19	+	5
ctg16-18961554-18961758	89.7634	96.0879	82.2258	13.8621	0.00212864	0.0436811	USH2A	3.84444	-3.10458	0.022125	TRUE	FALSE	TRUE	FALSE	BosERV12	-	7
ctg16-19124431-19124525	72.9619	80.647	63.3859	17.2611	1.49417e-05	0.0115594	USH2A	3.84444	-3.10458	0.022125	TRUE	FALSE	TRUE	FALSE	BosERV12	+	4
ctg16-20464448-20464598	70.3902	86.6042	50.4346	36.1696	1.97454e-06	0.00843159	ESRRG	22.5192	-3.40971	0.000439364	TRUE	FALSE	TRUE	FALSE	BosERV11	-	3
ctg16-27204108-27204230	77.5661	91.5125	60.4013	31.1112	0.000126017	0.015996	TP53BP2	105.397	-3.05786	5.5e-05	TRUE	FALSE	TRUE	FALSE	BosERV12	-	3
ctg16-27208612-27208939	75.9331	86.9791	62.2511	24.7279	2.67594e-05	0.011936	TP53BP2	105.397	-3.05786	5.5e-05	TRUE	FALSE	FALSE	TRUE	BosERV20	+	8
ctg16-2847908-2848039	60.823	70.4021	49.0333	21.3687	0.00015926	0.0168702	CNTN2	3.51763	-2.3027	0.045215	TRUE	FALSE	TRUE	FALSE	BosERV20	+	6
ctg16-3341601-3341786	86.0232	93.2207	77.0804	16.1403	0.00149782	0.0369542	MFSD4A	322.005	-4.97906	1.17e-06	TRUE	FALSE	TRUE	FALSE	BosERV12	-	5
ctg16-41535948-41536167	82.5482	89.5583	73.8608	15.6975	0.00178879	0.0402479	TNFRSF1B	5677.04	1.12084	0.00246805	TRUE	FALSE	TRUE	FALSE	BosERV12	-	6
ctg16-41627114-41627327	50.1454	44.7818	56.7468	-11.965	0.00178879	0.0402479	TNFRSF8	68.8191	1.97989	4.67e-05	TRUE	FALSE	TRUE	FALSE	BosERV20	-	6
ctg16-4719077-4719428	25.2017	14.7375	38.0808	-23.3433	0.000707298	0.0271592	PIGR	2455.36	-3.41066	0.000444177	TRUE	FALSE	TRUE	FALSE	BosERV20	-	3
ctg16-4878547-4878866	49.3302	43.4911	57.1409	-13.6497	0.000858483	0.0290793	PFKFB2	112.499	-1.26671	0.0448674	TRUE	FALSE	TRUE	FALSE	BosERV12	+	6
ctg16-51805498-51805760	57.8865	66.488	47.1129	19.3751	0.00184367	0.0411174	FBLIM1	58.6131	-2.00727	0.00413346	TRUE	FALSE	FALSE	TRUE	BosERV20	-	4
ctg16-52070363-52070509	72.7753	86.801	55.5128	31.2882	0.000707298	0.0271592	EFHD2	14134.4	1.05064	0.00765428	TRUE	FALSE	TRUE	FALSE	BosERV20	-	3
ctg16-52070379-52070591	76.3911	88.9043	61.5417	27.3626	0.000707298	0.0271592	EFHD2	14134.4	1.05064	0.00765428	TRUE	FALSE	TRUE	FALSE	BosERV12	-	6
ctg16-52474096-52474226	70.8241	81.149	58.1167	23.0323	0.000707298	0.0271592	KAZN	17.4112	-1.6417	0.00055595	TRUE	FALSE	TRUE	FALSE	BosERV12	+	3
ctg16-52494146-52494222	88.4671	96.0326	79.0878	16.9448	0.000484909	0.0239265	KAZN	17.4112	-1.6417	0.00055595	TRUE	FALSE	TRUE	FALSE	BosERV11	+	3
ctg16-52494148-52494241	88.4671	96.0326	79.0878	16.9448	0.000484909	0.0239265	KAZN	17.4112	-1.6417	0.00055595	TRUE	FALSE	TRUE	FALSE	BosERV20	-	3
ctg16-52545353-52545489	67.7959	80.8499	51.9846	28.8653	0.000250236	0.0190715	KAZN	17.4112	-1.6417	0.00055595	TRUE	TRUE	FALSE	FALSE	BosERV20	+	4
ctg16-52545402-52545500	76.5408	91.7344	57.841	33.8933	5.9973e-05	0.0136462	KAZN	17.4112	-1.6417	0.00055595	TRUE	TRUE	FALSE	FALSE	BosERV20	-	3
ctg16-52808798-52809010	65.9905	73.0631	57.2029	15.8602	0.00124915	0.0343076	KAZN	17.4112	-1.6417	0.00055595	TRUE	FALSE	TRUE	FALSE	BosERV12	+	3
ctg16-53281922-53282123	80.1832	90.6236	68.712	21.9116	0.00038477	0.0220793	KAZN	17.4112	-1.6417	0.00055595	TRUE	FALSE	TRUE	FALSE	BosERV12	-	4
ctg16-59410272-59410366	81.7868	91.1447	70.4526	20.6922	0.000311152	0.0207088	LOC100299281	1536.67	-1.34918	0.000166422	TRUE	FALSE	TRUE	FALSE	BosERV12	+	3
ctg16-59436187-59436271	90.9359	97.2956	83.2205	14.0751	0.000443811	0.0237007	LOC100299281	1536.67	-1.34918	0.000166422	TRUE	FALSE	TRUE	FALSE	BosERV11	+	4
ctg16-73101963-73102036	90.1241	95.35	83.6923	11.6577	0.000572858	0.025158	SERTAD4	74.5999	-3.22287	0.000189897	TRUE	FALSE	TRUE	FALSE	BosERV11	+	3
ctg16-73666404-73666485	89.3595	95.1492	82.2337	12.9156	0.000210157	0.0184471	LAMB3	672.372	2.84912	0.000218457	TRUE	FALSE	TRUE	FALSE	BosERV11	+	4
ctg16-73666419-73666613	86.1381	94.325	75.7159	18.6091	0.000350963	0.0220793	LAMB3	672.372	2.84912	0.000218457	TRUE	FALSE	TRUE	FALSE	BosERV12	-	6
ctg16-73696790-73696964	90.0371	96.0346	82.8165	13.2181	2.85866e-06	0.00843159	LAMB3	672.372	2.84912	0.000218457	TRUE	FALSE	TRUE	FALSE	BosERV12	+	4
ctg16-75690221-75690407	87.5871	94.9625	78.5096	16.4529	0.00212864	0.0436811	LOC518224	2.37276	-3.15433	0.0204608	TRUE	FALSE	TRUE	FALSE	BosERV12	+	6
ctg16-79788510-79788712	78.8712	89.5211	65.7029	23.8182	0.00038477	0.0220793	PKP1	84.2915	-2.4837	0.00155618	TRUE	FALSE	TRUE	FALSE	BosERV12	-	4
ctg16-80571762-80571889	87.0859	93.1967	79.7337	13.4631	0.000858483	0.0290793	LMOD1	2.45185	-2.89391	0.013248	TRUE	FALSE	TRUE	FALSE	BosERV20	+	4
ctg17-14325877-14326082	82.3805	88.6892	75.3115	13.3777	2.00696e-05	0.0117801	FREM3	3.92587	-3.24433	0.00779404	TRUE	FALSE	TRUE	FALSE	BosERV12	+	3
ctg17-16744622-16744829	76.8968	87.8255	63.4462	24.3794	0.00252352	0.047363	RNF150	1109.51	1.08397	0.0057537	TRUE	FALSE	TRUE	FALSE	BosERV12	+	6
ctg17-39703919-39704110	89.6043	96.2225	81.5212	14.7013	0.00212864	0.0436811	RAPGEF2	861.019	-1.50128	5.33e-05	TRUE	FALSE	TRUE	FALSE	BosERV12	-	6
ctg17-39759165-39759309	87.9317	95.0989	79.3664	15.7325	0.00103361	0.0316416	RAPGEF2	861.019	-1.50128	5.33e-05	TRUE	FALSE	TRUE	FALSE	BosERV20	-	4
ctg17-39762209-39762405	87.6616	95.9245	76.7344	19.19	0.00176328	0.0402479	RAPGEF2	861.019	-1.50128	5.33e-05	TRUE	FALSE	TRUE	FALSE	BosERV12	+	4
ctg17-42248466-42248583	86.2798	92.8379	78.7808	14.0571	0.000572858	0.025158	PDGFC	88.3799	-1.98066	0.000281828	TRUE	FALSE	TRUE	FALSE	BosERV20	+	4
ctg17-4434957-4435155	82.6117	90.6625	72.9154	17.7471	0.000126017	0.015996	TRIM2	746.638	-3.10638	8.11e-05	TRUE	FALSE	TRUE	FALSE	BosERV12	+	5
ctg17-47409092-47409395	46.5807	55.0534	35.8014	19.252	0.000473624	0.0237007	TMEM132D	2.05844	-5.59437	0.00413346	TRUE	FALSE	TRUE	FALSE	BosERV12	+	3
ctg17-47973832-47974150	74.9924	80.0086	69.0346	10.974	2.00696e-05	0.0117801	TMEM132D	2.05844	-5.59437	0.00413346	TRUE	FALSE	TRUE	FALSE	BosERV20	+	4
ctg17-48034551-48034907	77.1753	82.899	70.1308	12.7682	4.97299e-05	0.0136462	TMEM132D	2.05844	-5.59437	0.00413346	TRUE	FALSE	TRUE	FALSE	BosERV20	+	3
ctg17-52692909-52693103	84.5314	96.5373	69.9623	26.5749	0.000294496	0.0207088	HIP1R	4133.77	2.72092	7.91e-05	TRUE	TRUE	FALSE	FALSE	BosERV12	-	5
ctg17-53329312-53329445	88.0207	95.318	79.0394	16.2785	9.90217e-05	0.0154941	BCL7A	51.9448	-1.83619	0.000370854	TRUE	FALSE	TRUE	FALSE	BosERV20	+	4
ctg17-53543184-53543464	81.9064	90.4644	71.3961	19.0683	0.00178879	0.0402479	TMEM120B	829.234	-3.34104	7.39e-05	TRUE	FALSE	TRUE	FALSE	BosERV20	+	7
ctg17-55068864-55069241	89.46	94.7426	83.2449	11.4977	0.000488171	0.0239265	CUX2	1.94252	-2.45745	0.0255156	TRUE	FALSE	TRUE	FALSE	BosERV20	+	3
ctg17-61288675-61288819	86.493	96.1219	74.3907	21.7312	8.64413e-05	0.0154941	SLC8B1	2111.85	1.83608	0.000317296	TRUE	FALSE	TRUE	FALSE	BosERV20	+	3
ctg17-61289851-61289991	85.2417	92.8962	75.8208	17.0755	0.000858483	0.0290793	SLC8B1	2111.85	1.83608	0.000317296	TRUE	FALSE	TRUE	FALSE	BosERV12	-	5
ctg17-61386382-61386529	25.13	8.16741	45.8196	-37.6522	0.00260089	0.0486564	OAS1X	457.597	2.3603	0.0107313	TRUE	FALSE	FALSE	TRUE	BosERV20	+	9
ctg17-61459646-61459781	85.378	91.5597	77.9538	13.6059	0.00124915	0.0343076	RPH3A	24.3525	3.06698	0.000454283	TRUE	FALSE	TRUE	FALSE	BosERV20	-	3
ctg17-61459667-61459865	85.378	91.5597	77.9538	13.6059	0.00124915	0.0343076	RPH3A	24.3525	3.06698	0.000454283	TRUE	FALSE	TRUE	FALSE	BosERV12	-	3
ctg17-63616090-63616288	79.8913	90.3191	66.9696	23.3495	3.52765e-05	0.0127862	MVK	155.804	-1.13968	0.00537506	TRUE	FALSE	TRUE	FALSE	BosERV12	-	8
ctg17-63634059-63634156	84.6353	90.0109	78.0192	11.9917	0.00015926	0.0168702	MMAB	60.226	-1.29344	0.00438606	TRUE	FALSE	TRUE	FALSE	BosERV19	-	4
ctg17-68922669-68922803	77.6828	93.824	57.8167	36.0073	0.000209023	0.0184471	LOC101904268	1.51369	-5.85537	0.00210226	TRUE	TRUE	FALSE	FALSE	BosERV11	+	3
ctg17-71748698-71748763	82.2293	89.2244	73.62	15.6044	0.000473624	0.0237007	BCR	113.714	-1.76115	0.000617731	TRUE	FALSE	TRUE	FALSE	BosERV20	-	5
ctg17-71754586-71754811	61.1599	55.2296	68.3915	-13.1618	0.00103778	0.0316416	BCR	113.714	-1.76115	0.000617731	TRUE	FALSE	TRUE	FALSE	BosERV12	-	8
ctg17-72298072-72298199	82.7655	91.8312	71.6077	20.2236	0.00178879	0.0402479	CRKL	3214.97	1.3719	0.00135802	TRUE	FALSE	TRUE	FALSE	BosERV12	-	3
ctg17-72303210-72303413	80.2825	93.4453	64.0821	29.3633	9.90217e-05	0.0154941	CRKL	3214.97	1.3719	0.00135802	TRUE	FALSE	TRUE	FALSE	BosERV12	-	6
ctg17-72482261-72482357	91.2989	95.8958	85.641	10.2548	0.000672149	0.0271592	KLHL22	441.074	1.45501	0.0238794	TRUE	FALSE	FALSE	TRUE	BosERV20	-	3
ctg17-9737177-9737375	77.7474	83.4763	70.6179	12.8584	0.00252352	0.047363	NR3C2	975.095	-5.07352	1.01e-06	TRUE	FALSE	TRUE	FALSE	BosERV12	-	3
ctg17-9889261-9889469	47.4391	39.507	56.3822	-16.8752	0.00103778	0.0316416	NR3C2	975.095	-5.07352	1.01e-06	TRUE	FALSE	TRUE	FALSE	BosERV12	+	4
ctg18-10608430-10608633	85.5684	93.2083	76.1654	17.0429	0.000473624	0.0237007	ATP2C2	334.854	-5.33093	1.61e-07	TRUE	FALSE	TRUE	FALSE	BosERV12	+	3
ctg18-2169973-2170035	92.3593	97.0954	86.5309	10.5644	0.00131473	0.0355516	FA2H	10.0212	-3.81129	0.00011564	TRUE	FALSE	TRUE	FALSE	BosERV12	-	4
ctg18-2181062-2181193	70.8922	83.683	55.4628	28.2202	0.000473624	0.0237007	FA2H	10.0212	-3.81129	0.00011564	TRUE	FALSE	TRUE	FALSE	BosERV12	+	6
ctg18-2181077-2181269	70.8922	83.683	55.4628	28.2202	0.000473624	0.0237007	FA2H	10.0212	-3.81129	0.00011564	TRUE	FALSE	TRUE	FALSE	BosERV20	-	6
ctg18-24043752-24043872	47.3005	53.633	39.7123	13.9207	0.00178879	0.0402479	MT2A	151.607	-1.62247	0.00094367	TRUE	FALSE	FALSE	TRUE	BosERV20	+	5
ctg18-25938526-25938731	70.7654	81.7232	58.1139	23.6093	0.000707298	0.0271592	MMP15	114.962	-3.14593	0.000116922	TRUE	FALSE	FALSE	TRUE	BosERV12	-	8
ctg18-34398472-34398775	85.9474	90.729	80.2647	10.4642	0.00252352	0.047363	CMTM4	98.6323	-1.35397	0.00486422	TRUE	FALSE	TRUE	FALSE	BosERV20	-	4
ctg18-36095145-36095358	82.6804	93.3814	69.3968	23.9845	0.00015926	0.0168702	CDH1	572.325	-2.44841	1.15e-05	TRUE	FALSE	TRUE	FALSE	BosERV12	-	6
ctg18-43468053-43468124	84.5943	92.1813	75.2564	16.9248	0.000707298	0.0271592	RHPN2	160.653	-4.08183	3.54e-06	TRUE	FALSE	TRUE	FALSE	BosERV11	-	3
ctg18-45770027-45770231	82.6514	91.6663	71.5562	20.1101	0.000126017	0.015996	SCN1B	36.0431	-2.17601	0.00828782	TRUE	FALSE	FALSE	TRUE	BosERV12	+	5
ctg18-46680397-46680606	87.3749	95.2598	78.0632	17.1966	0.00230253	0.0460661	SYNE4	5.82466	-3.9309	0.00449824	TRUE	FALSE	TRUE	FALSE	BosERV12	-	6
ctg18-48099035-48099238	71.9323	76.9703	65.7317	11.2386	0.00266198	0.0490488	SPINT2	554.682	-2.04804	0.00172642	TRUE	FALSE	TRUE	FALSE	BosERV12	+	4
ctg18-48274691-48274804	85.5966	91.4302	78.4167	13.0135	0.000580014	0.025158	RYR1	93.8414	1.23241	0.0220681	TRUE	FALSE	TRUE	FALSE	BosERV19	+	3
ctg18-48553606-48553804	82.9341	89.768	74.5231	15.2449	0.00252352	0.047363	ECH1	218.374	-1.01676	0.000436893	TRUE	FALSE	TRUE	FALSE	BosERV12	+	4
ctg18-48865807-48865937	78.0792	94.6312	54.678	39.9532	0.00021489	0.0188215	PAK4	177.265	-1.42135	0.00074664	TRUE	TRUE	TRUE	FALSE	BosERV11	-	3
ctg18-48890181-48890382	89.3998	96.5507	81.0306	15.5201	0.0012329	0.0343076	PAK4	177.265	-1.42135	0.00074664	TRUE	FALSE	TRUE	FALSE	BosERV12	-	8
ctg18-50299765-50299964	40.4224	46.9465	31.5535	15.3929	0.00252352	0.047363	CYP2B6	11.75	-5.15789	1.49e-05	TRUE	FALSE	TRUE	FALSE	BosERV12	+	4
ctg18-51214641-51214768	88.0943	94.2685	80.7319	13.5365	0.000987143	0.0316416	GRIK5	6.11316	-1.9881	0.0230116	TRUE	FALSE	TRUE	FALSE	BosERV12	-	3
ctg18-51235273-51235327	87.8216	94.2406	79.9212	14.3195	0.000858436	0.0290793	GRIK5	6.11316	-1.9881	0.0230116	TRUE	FALSE	TRUE	FALSE	BosERV12	+	4
ctg18-52707902-52707999	58.2185	71.9021	40.5282	31.3739	0.00212864	0.0436811	RELB	969.682	1.65383	4.67e-05	TRUE	FALSE	TRUE	FALSE	BosERV19	-	3
ctg18-54367121-54367328	91.6761	96.88	84.8118	12.0683	0.00185087	0.0411853	DHX34	597.603	1.12388	0.00935558	TRUE	FALSE	TRUE	FALSE	BosERV12	+	3
ctg18-60873162-60873371	8.53042	1.22611	17.0708	-15.8447	0.000547301	0.025158	MGC139164	880.858	1.33658	0.0445105	TRUE	FALSE	TRUE	FALSE	BosERV12	+	9
ctg18-60911912-60912325	35.5899	27.0184	46.3886	-19.3701	0.000580014	0.025158	NLRP12	339.603	2.52115	0.00468277	TRUE	FALSE	TRUE	FALSE	BosERV14	+	10
ctg18-62318437-62318771	36.6478	26.587	49.5103	-22.9233	9.90217e-05	0.0154941	EPS8L1	99.0864	-3.52255	1.36e-05	TRUE	FALSE	TRUE	FALSE	BosERV20	-	8
ctg18-62411007-62411351	85.7936	90.3413	80.0252	10.3161	7.73607e-05	0.0146299	NLRP2	39.7745	2.25561	0.00826608	TRUE	FALSE	TRUE	FALSE	BosERV20	-	5
ctg18-62447893-62448178	83.3251	89.6318	75.7091	13.9227	0.000126017	0.015996	LOC100336589	842.083	1.69005	0.021192	TRUE	TRUE	FALSE	FALSE	BosERV20	-	8
ctg18-62451274-62452017	87.4612	94.0857	79.3508	14.735	0.00100256	0.0316416	LOC100336589	842.083	1.69005	0.021192	TRUE	FALSE	TRUE	FALSE	BosERV8	+	3
ctg18-63298964-63299100	15.0042	2.39479	31.8167	-29.4219	0.000168846	0.0177781	TARM1	421.551	3.46323	2.49e-05	TRUE	FALSE	TRUE	FALSE	BosERV20	-	3
ctg18-8347219-8347358	26.0448	16.7531	37.4808	-20.7276	0.000580014	0.025158	PLCG2	1492.83	1.1816	0.000892137	TRUE	FALSE	TRUE	FALSE	BosERV12	+	3
ctg18-8363926-8364007	13.0307	3.5675	24.6777	-21.1102	5.9973e-05	0.0136462	PLCG2	1492.83	1.1816	0.000892137	TRUE	FALSE	TRUE	FALSE	BosERV20	+	5
ctg18-8396865-8397045	89.2072	96.1828	80.6697	15.5131	0.000412587	0.0231235	PLCG2	1492.83	1.1816	0.000892137	TRUE	FALSE	TRUE	FALSE	BosERV12	-	3
ctg19-10772026-10772306	85.8961	95.9041	73.6461	22.258	0.000103831	0.0158678	VMP1	7036.11	2.23086	0.000667484	TRUE	FALSE	TRUE	FALSE	BosERV20	-	6
ctg19-13489770-13489951	87.8909	82.9733	94.1094	-11.1361	0.00103778	0.0316416	ACACA	1974.98	-2.5045	0.000417678	TRUE	FALSE	TRUE	FALSE	BosERV11	-	6
ctg19-13661508-13661628	90.9929	96.5523	83.8095	12.7429	0.000855905	0.0290793	ACACA	1974.98	-2.5045	0.000417678	TRUE	FALSE	TRUE	FALSE	BosERV19	-	4
ctg19-13802177-13802373	92.3563	97.8604	85.5821	12.2784	0.0021449	0.0437583	DUSP14	97.5709	-1.17115	0.0210194	TRUE	FALSE	TRUE	FALSE	BosERV12	-	3
ctg19-17425778-17426008	72.4096	79.0169	64.7404	14.2765	0.00252352	0.047363	MYO1D	395.892	-1.42873	0.000443903	TRUE	FALSE	TRUE	FALSE	BosERV12	+	4
ctg19-17596617-17596705	92.3095	97.4365	85.3564	12.0801	0.000427478	0.0237007	MYO1D	395.892	-1.42873	0.000443903	TRUE	FALSE	TRUE	FALSE	BosERV20	-	3
ctg19-17622339-17622558	89.9637	96.1909	82.3019	13.8889	0.00149782	0.0369542	MYO1D	395.892	-1.42873	0.000443903	TRUE	FALSE	TRUE	FALSE	BosERV12	-	6
ctg19-19102229-19102353	79.9597	94.8711	61.1518	33.7193	0.000349194	0.0220793	KSR1	673.148	1.3929	1.56e-05	TRUE	FALSE	TRUE	FALSE	BosERV12	+	4
ctg19-19102254-19102572	87.3227	96.2477	76.1105	20.1372	0.000250236	0.0190715	KSR1	673.148	1.3929	1.56e-05	TRUE	FALSE	TRUE	FALSE	BosERV12	-	8
ctg19-19174959-19175182	90.8195	95.7415	84.7692	10.9722	0.00136453	0.0365303	KSR1	673.148	1.3929	1.56e-05	TRUE	FALSE	TRUE	FALSE	BosERV12	-	3
ctg19-19185935-19186155	80.8946	90.0892	69.4759	20.6132	0.00124915	0.0343076	KSR1	673.148	1.3929	1.56e-05	TRUE	FALSE	TRUE	FALSE	BosERV12	+	5
ctg19-21113108-21113484	90.1764	95.3785	83.7676	11.6109	7.73607e-05	0.0146299	SSH2	7364.64	1.51985	0.0184741	TRUE	FALSE	TRUE	FALSE	BosERV20	+	4
ctg19-22012549-22012746	86.7138	93.1117	78.8378	14.2738	0.00212864	0.0436811	NXN	158.264	-2.01702	0.000335554	TRUE	FALSE	TRUE	FALSE	BosERV12	+	6
ctg19-24946376-24946511	76.6957	89.8312	60.5288	29.3024	0.000200254	0.0180833	SPNS2	240.582	-3.13321	8.19e-06	TRUE	FALSE	TRUE	FALSE	BosERV20	+	4
ctg19-24960747-24960936	88.6176	93.6044	82.48	11.1244	0.000200254	0.0180833	SPNS2	240.582	-3.13321	8.19e-06	TRUE	FALSE	TRUE	FALSE	BosERV12	+	5
ctg19-24960850-24960947	88.0328	94.2708	80.3551	13.9157	0.000126017	0.015996	SPNS2	240.582	-3.13321	8.19e-06	TRUE	FALSE	TRUE	FALSE	BosERV19	+	3
ctg19-28313833-28313976	89.1213	95.2833	81.5372	13.7462	0.000792006	0.0290793	PIK3R6	233.74	2.12174	9.97e-05	TRUE	FALSE	TRUE	FALSE	BosERV20	-	3
ctg19-33192570-33192777	74.563	88.1754	58.6264	29.549	0.00103778	0.0316416	LRRC75A	19.3945	-3.20936	3.58e-05	TRUE	FALSE	TRUE	FALSE	BosERV12	+	7
ctg19-34914745-34914909	86.4821	93.3725	78.3819	14.9906	0.000311152	0.0207088	FLCN	1168.18	1.16625	0.000211869	TRUE	FALSE	FALSE	TRUE	BosERV12	+	4
ctg19-34917343-34917544	72.966	79.8921	64.6185	15.2737	0.00212864	0.0436811	FLCN	1168.18	1.16625	0.000211869	TRUE	FALSE	TRUE	FALSE	BosERV12	-	5
ctg19-40080233-40080430	83.2278	89.1752	75.9682	13.207	0.00178879	0.0402479	ERBB2	153.177	-2.83058	7.37e-05	TRUE	FALSE	TRUE	FALSE	BosERV12	+	4
ctg19-40105402-40105608	74.537	93.0302	51.2566	41.7736	8.45937e-05	0.0154941	GRB7	61.6269	-3.11788	1.7e-05	TRUE	FALSE	TRUE	FALSE	BosERV12	+	3
ctg19-41976699-41976919	87.0218	93.9445	78.2477	15.6968	0.000200254	0.0180833	JUP	464.652	-2.59973	5.13e-05	TRUE	FALSE	TRUE	FALSE	BosERV12	+	8
ctg19-48249110-48249406	44.9451	33.8684	58.32	-24.4516	5.9973e-05	0.0136462	LOC616254	2146.31	1.48995	0.00167929	TRUE	FALSE	TRUE	FALSE	BosERV7	+	5
ctg19-49439637-49439873	87.375	93.1174	80.4929	12.6244	0.000858483	0.0290793	LOC104975111	2.48402	-3.72117	0.0358895	TRUE	TRUE	TRUE	FALSE	BosERV12	+	6
ctg19-55638637-55638748	65.1718	73.9802	54.3308	19.6494	0.000311152	0.0207088	EVPL	42.8962	-3.54095	1.39e-05	TRUE	FALSE	TRUE	FALSE	BosERV20	-	3
ctg19-55638651-55638835	72.4134	79.757	63.375	16.382	0.00015926	0.0168702	EVPL	42.8962	-3.54095	1.39e-05	TRUE	FALSE	TRUE	FALSE	BosERV12	+	4
ctg19-56015444-56015649	78.0089	84.6599	69.8231	14.8368	0.00103778	0.0316416	LLGL2	289.362	-1.6053	0.000218082	TRUE	FALSE	TRUE	FALSE	BosERV12	-	6
ctg19-56123695-56123945	88.0167	92.6475	82.5173	10.1302	0.000580014	0.025158	GRB2	4058.82	1.20592	0.00182049	TRUE	FALSE	TRUE	FALSE	BosERV20	-	4
ctg19-56176403-56176577	60.8566	55.6938	67.397	-11.7032	0.00149782	0.0369542	GRB2	4058.82	1.20592	0.00182049	TRUE	FALSE	TRUE	FALSE	BosERV20	-	7
ctg19-56942881-56943001	44.2276	31.0019	60.5054	-29.5035	0.00149782	0.0369542	CD300A	402.202	2.10191	0.00135802	TRUE	FALSE	TRUE	FALSE	BosERV11	+	5
ctg19-56983024-56983433	74.5573	86.168	60.2673	25.9007	0.000707298	0.0271592	GPRC5C	41.5529	-3.5504	1.41e-05	TRUE	FALSE	TRUE	FALSE	BosERV20	+	4
ctg19-56983339-56983450	76.7994	88.5656	62.3179	26.2477	0.00038477	0.0220793	GPRC5C	41.5529	-3.5504	1.41e-05	TRUE	FALSE	TRUE	FALSE	BosERV11	-	3
ctg19-57727871-57727982	89.3505	94.2152	83.4623	10.7529	0.000676282	0.0271592	SDK2	5.21013	-3.41379	0.000887119	TRUE	FALSE	TRUE	FALSE	BosERV20	+	5
ctg19-57933585-57933663	85.8141	95.0808	74.9394	20.1414	0.00196108	0.0434352	SDK2	5.21013	-3.41379	0.000887119	TRUE	FALSE	TRUE	FALSE	BosERV19	+	3
ctg19-58006798-58006930	86.3751	92.2719	78.8077	13.4642	3.52765e-05	0.0127862	SDK2	5.21013	-3.41379	0.000887119	TRUE	FALSE	TRUE	FALSE	BosERV20	+	3
ctg19-58539061-58539320	78.5105	86.6177	69.1067	17.511	0.00178879	0.0402479	LOC101907523	48.7845	-2.47778	0.000233316	TRUE	FALSE	TRUE	FALSE	BosERV20	+	4
ctg19-60719719-60719883	88.8366	95.9344	79.8702	16.0642	0.00116581	0.0343076	KCNJ16	83.612	1.85424	0.00526129	TRUE	FALSE	TRUE	FALSE	BosERV20	+	4
ctg19-8097033-8097245	54.8666	44.3177	68.0829	-23.7652	4.62101e-05	0.013545	MSI2	651.09	-1.62792	0.0122537	TRUE	FALSE	TRUE	FALSE	BosERV12	+	6
ctg19-8750536-8750669	63.8474	72.4984	53.2	19.2984	0.000580014	0.025158	CUEDC1	179.534	-3.30057	8.25e-06	TRUE	FALSE	TRUE	FALSE	BosERV20	+	4
ctg19-9218917-9219135	83.3249	89.743	75.7638	13.9793	0.00252352	0.047363	LPO	1197.56	-6.53412	2.73e-07	TRUE	FALSE	TRUE	FALSE	BosERV12	+	5
ctg19-9340127-9340308	84.7998	96.2413	72.1439	24.0974	5.94424e-05	0.0136462	RNF43	36.0856	-1.49491	0.0142352	TRUE	FALSE	TRUE	FALSE	BosERV12	+	6
ctg2-101520184-101520387	77.9546	83.9417	70.5859	13.3558	0.00124915	0.0343076	SPAG16	10.2423	-2.04262	0.00602002	TRUE	FALSE	TRUE	FALSE	BosERV12	+	3
ctg2-101582078-101582352	75.7636	81.5342	68.51	13.0242	0.00212864	0.0436811	SPAG16	10.2423	-2.04262	0.00602002	TRUE	FALSE	TRUE	FALSE	BosERV20	+	4
ctg2-112494487-112494686	86.3178	91.931	79.1231	12.8079	0.00038477	0.0220793	FAM124B	33.6187	-4.42487	0.000288933	TRUE	FALSE	TRUE	FALSE	BosERV12	-	3
ctg2-117070238-117070325	17.4617	6.94365	29.8327	-22.889	7.73607e-05	0.0146299	PID1	81.566	1.32527	0.0201498	TRUE	FALSE	TRUE	FALSE	BosERV12	+	4
ctg2-117108067-117108377	63.8549	72.3931	53.5231	18.87	0.000473624	0.0237007	PID1	81.566	1.32527	0.0201498	TRUE	FALSE	TRUE	FALSE	BosERV20	-	4
ctg2-117108288-117108392	57.1888	67.7251	44.4564	23.2687	0.00038477	0.0220793	PID1	81.566	1.32527	0.0201498	TRUE	FALSE	TRUE	FALSE	BosERV20	+	3
ctg2-117146497-117146602	75.452	88.7001	58.9771	29.723	8.66152e-05	0.0154941	PID1	81.566	1.32527	0.0201498	TRUE	FALSE	TRUE	FALSE	BosERV12	+	3
ctg2-117260448-117260654	72.548	79.2862	64.3094	14.9768	0.00038477	0.0220793	PID1	81.566	1.32527	0.0201498	TRUE	FALSE	TRUE	FALSE	BosERV12	-	3
ctg2-118201032-118201139	79.7155	93.4115	62.859	30.5525	0.000473624	0.0237007	SP110	367.535	1.42089	3.73e-05	TRUE	FALSE	TRUE	FALSE	BosERV19	-	3
ctg2-118668812-118668906	39.354	28.6687	52.5051	-23.8364	0.00015926	0.0168702	ITM2C	1826.07	2.13418	8.08e-05	TRUE	FALSE	TRUE	FALSE	BosERV12	+	3
ctg2-118668822-118668995	45.5749	36.9325	56.0744	-19.1419	0.000793191	0.0290793	ITM2C	1826.07	2.13418	8.08e-05	TRUE	FALSE	TRUE	FALSE	BosERV12	-	3
ctg2-118808632-118808726	75.9695	71.2799	81.7347	-10.4549	0.00235329	0.0470218	SPATA3	5.50638	-7.21501	2.05e-05	TRUE	FALSE	TRUE	FALSE	BosERV19	+	3
ctg2-119072473-119072562	82.5319	95.0844	67.0827	28.0017	0.00107141	0.0324592	ARMC9	23.5322	-1.4749	0.00197417	TRUE	FALSE	TRUE	FALSE	BosERV19	-	4
ctg2-125409684-125410575	74.7841	84.8427	62.9614	21.8813	0.000311152	0.0207088	LOC112443407	10.0422	3.28931	0.00345322	TRUE	TRUE	FALSE	FALSE	BosERV16	+	4
ctg2-125699576-125699703	82.8195	91.1794	72.4087	18.7707	0.000580014	0.025158	FGR	2741.99	1.78389	3.6e-05	TRUE	FALSE	TRUE	FALSE	BosERV20	-	5
ctg2-125699592-125699773	67.8595	72.7475	61.7218	11.0257	0.000250236	0.0190715	FGR	2741.99	1.78389	3.6e-05	TRUE	FALSE	TRUE	FALSE	BosERV12	-	5
[truncated: 593 more rows]

## Sheet: S5D_summary
Table S5D Summary of diiffeentially methylated genes overlapping differentialy methylated retrotranposons
[truncated: 1,366 more rows]

[truncated: 1 more sheets: S5E_GO_KEGG]
